# Supplementary material
Source: PubMed Central journal article supplement (PMC5483916)
Supplement: JCM.00164-17_zjm999095555s2.pdf [file JCM.00164-17_zjm999095555s2.pdf]

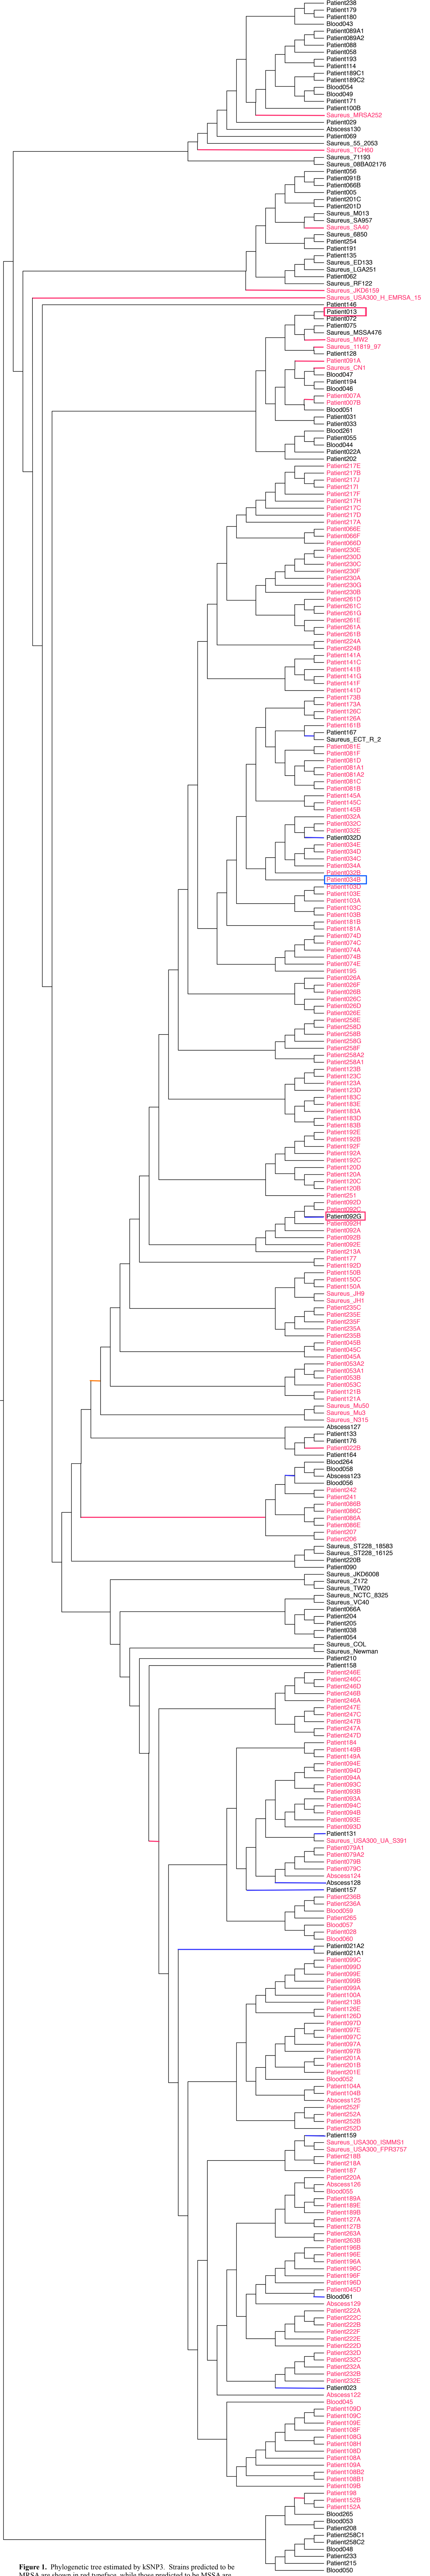

**Figure 1.** Phylogenetic tree estimated by kSNP3. Strains predicted to be MRSA are shown in red typeface, while those predicted to be MSSA are shown in black typeface. The three strains in which there is a conflict between the predicted phenotype and the experimentally determined phenotype are enclosed in boxes. Branches along which the predicted phenotype changed from MSSA to MRSA are shown in red, while those in which the predicted phenotype changed from MRSA to MSSA are shown in blue.
