# Supplementary material
Source: PubMed Central journal article supplement (PMC5483916)
Supplement: JCM.00164-17_zjm999095555s6.pdf [file JCM.00164-17_zjm999095555s6.pdf]

**Table S3 Isolate Information**

| <b>Accession</b> | <b>SampleID</b> | <b>PatientNo</b> | <b>Date</b> | <b>Obs MRMS</b> | <b>Predic MRMS</b> |
|------------------|-----------------|------------------|-------------|-----------------|--------------------|
| 143510732        | CFSA199         | Patient005       | 12/17/14    | MSSA            | MSSA               |
| 141201151        | CFSA006         | Patient007A      | 4/30/14     | MRSA            | MRSA               |
| 141551839        | CFSA005         | Patient007B      | 6/4/14      | MRSA            | MRSA               |
| 150561012        | CFSA225         | Patient013       | 2/25/15     | MRSA            | MSSA               |
| 142670669        | CFSA108         | Patient021A1     | 9/24/14     | MSSA            | MSSA               |
| 142670669        | CFSA164         | Patient021A2     | 9/24/14     | MSSA            | MSSA               |
| 143282240        | CFSA163         | Patient022A      | 11/24/14    | MSSA            | MSSA               |
| 150541841        | CFSA227         | Patient022B      | 2/23/15     | MRSA            | MRSA               |
| 143372662        | CFSA162         | Patient023       | 12/3/14     | MSSA            | MSSA               |
| 142031128        | CFSA033         | Patient026A      | 7/23/14     | MRSA            | MRSA               |
| 142941321        | CFSA117         | Patient026B      | 10/21/14    | MRSA            | MRSA               |
| 150061036        | CFSA237         | Patient026C      | 1/6/15      | MRSA            | MRSA               |
| 151461139        | CFSA325         | Patient026D      | 5/26/15     | MRSA            | MRSA               |
| 152270157        | CFSA284         | Patient026E      | 8/16/15     | MRSA            | MRSA               |
| 153062574        | CFSA308         | Patient026F      | 11/2/15     | MRSA            | MRSA               |
| 141531496        | CFSA004         | Patient028       | 6/2/14      | MRSA            | MRSA               |
| 143631648        | CFSA231         | Patient029       | 12/29/14    | MSSA            | MSSA               |
| 142651145        | CFSA171         | Patient031       | 9/22/14     | MSSA            | MSSA               |
| 141340946        | CFSA003         | Patient032A      | 5/14/14     | MRSA            | MRSA               |
| 142950773        | CFSA118         | Patient032B      | 10/22/14    | MRSA            | MRSA               |
| 150771262        | CFSA206         | Patient032C      | 3/18/15     | MRSA            | MRSA               |
| 152170783        | CFSA343         | Patient032D      | 8/5/15      | MRSA            | MSSA               |
| 153361087        | CFSA314         | Patient032E      | 12/2/15     | MRSA            | MRSA               |
| 143440714        | CFSA190         | Patient033       | 12/10/14    | MSSA            | MSSA               |
| 142480928        | CFSA088         | Patient034A      | 9/5/14      | MRSA            | MRSA               |
| 142530949        | CFSA095         | Patient034B      | 9/10/14     | MSSA            | MRSA               |
| 143440715        | CFSA189         | Patient034C      | 12/10/14    | MRSA            | MRSA               |
| 153011052        | CFSA274         | Patient034D      | 10/28/15    | MRSA            | MRSA               |
| 160130993        | CFSA315         | Patient034E      | 1/13/16     | MRSA            | MRSA               |
| 143501082        | CFSA202         | Patient038       | 12/22/14    | MSSA            | MSSA               |
| 141111813        | CFSA093         | Patient045A      | 4/24/14     | MRSA            | MRSA               |
| 142722774        | CFSA102         | Patient045B      | 9/29/14     | MRSA            | MRSA               |
| 150961970        | CFSA347         | Patient045C      | 4/6/15      | MRSA            | MRSA               |
| 153210998        | CFSA344         | Patient045D      | 11/17/15    | MRSA            | MRSA               |

Siblings  
(032,  
033,034)

|           |         |              |          |      |      |
|-----------|---------|--------------|----------|------|------|
| 141400818 | CFSA001 | Patient053A1 | 5/20/14  | MRSA | MRSA |
| 141400818 | CFSA079 | Patient053A2 | 5/20/14  | MRSA | MRSA |
| 141760858 | CFSA080 | Patient053B  | 6/25/14  | MRSA | MRSA |
| 142470880 | CFSA098 | Patient053C  | 9/4/14   | MRSA | MRSA |
| 142660931 | CFSA140 | Patient054   | 9/23/14  | MSSA | MSSA |
| 142661070 | CFSA139 | Patient055   | 9/23/14  | MSSA | MSSA |
| 143631715 | CFSA232 | Patient056   | 12/29/14 | MSSA | MSSA |
| 143151423 | CFSA138 | Patient058   | 11/11/14 | MSSA | MSSA |
| 143220873 | CFSA137 | Patient062   | 11/18/14 | MSSA | MSSA |
| 150080646 | CFSA241 | Patient066A  | 1/8/15   | MSSA | MSSA |
| 150651607 | CFSA204 | Patient066B  | 3/6/15   | MSSA | MSSA |
| 152040717 | CFSA324 | Patient066D  | 7/23/15  | MRSA | MRSA |
| 152790746 | CFSA304 | Patient066E  | 10/6/15  | MRSA | MRSA |
| 160120614 | CFSA273 | Patient066F  | 1/12/16  | MRSA | MRSA |
| 142601044 | CFSA136 | Patient069   | 9/21/14  | MSSA | MSSA |
| 142581804 | CFSA070 | Patient072   | 9/19/14  | MSSA | MSSA |
| 141701004 | CFSA034 | Patient074A  | 6/19/14  | MRSA | MSSA |
| 142591223 | CFSA094 | Patient074B  | 9/16/14  | MRSA | MRSA |
| 150500760 | CFSA223 | Patient074C  | 2/19/15  | MRSA | MRSA |
| 152661184 | CFSA317 | Patient074D  | 9/23/15  | MRSA | MRSA |
| 160060668 | CFSA299 | Patient074E  | 1/6/16   | MRSA | MRSA |
| 142512052 | CFSA074 | Patient075   | 9/8/14   | MSSA | MRSA |
| 142180991 | CFSA035 | Patient079A1 | 8/6/14   | MRSA | MSSA |
| 142180991 | CFSA096 | Patient079A2 | 8/6/14   | MRSA | MRSA |
| 142861510 | CFSA103 | Patient079B  | 10/15/14 | MRSA | MRSA |
| 150210750 | CFSA250 | Patient079C  | 1/21/15  | MRSA | MRSA |
| 141881884 | CFSA036 | Patient081A1 | 7/7/14   | MRSA | MRSA |
| 141881884 | CFSA085 | Patient081A2 | 7/7/14   | MRSA | MRSA |
| 142731506 | CFSA101 | Patient081B  | 9/29/14  | MRSA | MRSA |
| 150821884 | CFSA207 | Patient081C  | 3/23/15  | MRSA | MRSA |
| 152081963 | CFSA353 | Patient081D  | 7/27/15  | MRSA | MRSA |
| 153510342 | CFSA277 | Patient081E  | 12/17/15 | MRSA | MRSA |
| 160111096 | CFSA290 | Patient081F  | 1/11/16  | MRSA | MRSA |
| 142052025 | CFSA037 | Patient086A  | 7/24/14  | MRSA | MRSA |
| 143221475 | CFSA195 | Patient086B  | 11/18/14 | MRSA | MRSA |
| 150611227 | CFSA228 | Patient086C  | 3/2/15   | MRSA | MRSA |
| 160130855 | CFSA316 | Patient086E  | 1/13/16  | MRSA | MRSA |
| 150140914 | CFSA246 | Patient088   | 1/14/15  | MSSA | MSSA |

Siblings  
(054, 055)

|           |         |              |          |      |      |                           |
|-----------|---------|--------------|----------|------|------|---------------------------|
| 150140760 | CFSA245 | Patient089A1 | 1/14/15  | MSSA | MSSA | Siblings<br>(088,089)     |
| 150141261 | CFSA247 | Patient089A2 | 1/14/15  | MSSA | MSSA |                           |
| 150841137 | CFSA210 | Patient090   | 3/25/15  | MSSA | MSSA |                           |
| 141540612 | CFSA012 | Patient091A  | 6/5/14   | MRSA | MRSA |                           |
| 142520910 | CFSA089 | Patient091B  | 9/9/14   | MSSA | MSSA |                           |
| 141100677 | CFSA011 | Patient092A  | 4/24/14  | MRSA | MRSA |                           |
| 143071678 | CFSA150 | Patient092B  | 11/3/14  | MRSA | MRSA |                           |
| 143492632 | CFSA173 | Patient092C  | 12/15/14 | MRSA | MRSA |                           |
| 150551081 | CFSA224 | Patient092D  | 2/24/15  | MRSA | MRSA |                           |
| 151382053 | CFSA296 | Patient092E  | 5/18/15  | MRSA | MRSA |                           |
| 153272518 | CFSA352 | Patient092G  | 11/23/15 | MRSA | MSSA |                           |
| 153351476 | CFSA288 | Patient092H  | 12/2/15  | MRSA | MRSA |                           |
| 150271376 | CFSA215 | Patient093A  | 1/27/15  | MRSA | MRSA |                           |
| 150831473 | CFSA209 | Patient093B  | 3/24/15  | MRSA | MRSA |                           |
| 151550644 | CFSA362 | Patient093C  | 6/4/15   | MRSA | MRSA |                           |
| 152660962 | CFSA365 | Patient093D  | 9/23/15  | MRSA | MRSA | Siblings<br>(093,<br>094) |
| 153361477 | CFSA359 | Patient093E  | 12/2/15  | MRSA | MRSA |                           |
| 150271267 | CFSA259 | Patient094A  | 1/27/15  | MRSA | MRSA |                           |
| 151032188 | CFSA361 | Patient094B  | 4/13/15  | MRSA | MRSA |                           |
| 152030935 | CFSA358 | Patient094C  | 7/22/15  | MRSA | MRSA |                           |
| 153011064 | CFSA355 | Patient094D  | 10/28/15 | MRSA | MRSA |                           |
| 160341439 | CFSA369 | Patient094E  | 2/3/16   | MRSA | MRSA |                           |
| 111340719 | CFSA091 | Patient097A  | 5/14/11  | MRSA | MRSA |                           |
| 141540873 | CFSA010 | Patient097B  | 6/3/14   | MRSA | MRSA |                           |
| 142691477 | CFSA109 | Patient097C  | 9/26/14  | MRSA | MRSA |                           |
| 150360864 | CFSA219 | Patient097D  | 2/5/15   | MRSA | MRSA |                           |
| 151631356 | CFSA349 | Patient097E  | 6/12/15  | MRSA | MRSA |                           |
| 142051070 | CFSA038 | Patient099A  | 7/24/14  | MRSA | MRSA |                           |
| 142961100 | CFSA119 | Patient099B  | 10/23/14 | MRSA | MRSA |                           |
| 150851018 | CFSA213 | Patient099C  | 3/26/15  | MRSA | MRSA | Siblings<br>(099,<br>100) |
| 151690722 | CFSA323 | Patient099D  | 6/18/15  | MRSA | MRSA |                           |
| 153241491 | CFSA301 | Patient099E  | 11/20/15 | MRSA | MRSA |                           |
| 141400777 | CFSA009 | Patient100A  | 5/20/14  | MRSA | MRSA |                           |
| 150061142 | CFSA238 | Patient100B  | 1/6/15   | MSSA | MSSA |                           |
| 141620941 | CFSA039 | Patient103A  | 6/11/14  | MRSA | MRSA |                           |
| 142951843 | CFSA104 | Patient103B  | 10/22/14 | MRSA | MRSA |                           |
| 150140675 | CFSA244 | Patient103C  | 1/14/15  | MRSA | MRSA |                           |
| 151242204 | CFSA334 | Patient103D  | 5/4/15   | MRSA | MRSA |                           |

|           |         |              |          |      |      |
|-----------|---------|--------------|----------|------|------|
| 152041823 | CFSA328 | Patient103E  | 7/23/15  | MRSA | MRSA |
| 142600599 | CFSA105 | Patient104A  | 9/17/14  | MRSA | MRSA |
| 143510930 | CFSA197 | Patient104B  | 12/17/14 | MRSA | MRSA |
| 141140800 | CFSA008 | Patient108A  | 4/29/14  | MRSA | MRSA |
| 142191118 | CFSA055 | Patient108B1 | 8/7/14   | MRSA | MRSA |
| 142191118 | CFSA194 | Patient108B2 | 8/7/14   | MRSA | MRSA |
| 143430882 | CFSA193 | Patient108D  | 12/9/14  | MRSA | MRSA |
| 151941352 | CFSA329 | Patient108F  | 7/13/15  | MRSA | MRSA |
| 153341154 | CFSA289 | Patient108G  | 11/30/15 | MRSA | MRSA |
| 160070813 | CFSA321 | Patient108H  | 1/7/16   | MRSA | MRSA |
| 142191119 | CFSA040 | Patient109A  | 8/7/14   | MRSA | MRSA |
| 143430883 | CFSA192 | Patient109B  | 12/9/14  | MRSA | MRSA |
| 151410852 | CFSA303 | Patient109C  | 5/21/15  | MRSA | MRSA |
| 152431375 | CFSA281 | Patient109D  | 8/31/15  | MRSA | MRSA |
| 160070814 | CFSA293 | Patient109E  | 1/7/16   | MRSA | MRSA |
| 150070576 | CFSA239 | Patient114   | 1/7/15   | MSSA | MSSA |
| 142380962 | CFSA087 | Patient120A  | 8/26/14  | MRSA | MRSA |
| 143430965 | CFSA191 | Patient120B  | 12/9/14  | MRSA | MRSA |
| 152221415 | CFSA313 | Patient120C  | 8/13/15  | MRSA | MRSA |
| 160141890 | CFSA272 | Patient120D  | 1/14/16  | MRSA | MRSA |
| 142870939 | CFSA114 | Patient121A  | 10/14/14 | MRSA | MRSA |
| 150831281 | CFSA208 | Patient121B  | 3/24/15  | MRSA | MRSA |
| 141630919 | CFSA041 | Patient123A  | 6/12/14  | MRSA | MRSA |
| 142460933 | CFSA097 | Patient123B  | 9/3/14   | MRSA | MRSA |
| 143361437 | CFSA149 | Patient123C  | 12/2/14  | MRSA | MRSA |
| 150841337 | CFSA211 | Patient123D  | 3/25/15  | MRSA | MRSA |
| 150261350 | CFSA256 | Patient126   | 1/22/15  | MRSA | MRSA |
| 152041007 | CFSA337 | Patient126C  | 7/23/15  | MRSA | MRSA |
| 152891654 | CFSA311 | Patient126D  | 10/15/15 | MRSA | MRSA |
| 160061449 | CFSA335 | Patient126E  | 1/6/16   | MRSA | MRSA |
| 141251406 | CFSA007 | Patient127A  | 5/5/14   | MRSA | MRSA |
| 142871001 | CFSA115 | Patient127B  | 10/14/14 | MRSA | MRSA |
| 150140586 | CFSA243 | Patient128   | 1/14/15  | MSSA | MSSA |
| 143370825 | CFSA135 | Patient131   | 12/3/14  | MSSA | MSSA |
| 143360971 | CFSA134 | Patient133   | 12/2/14  | MSSA | MSSA |
| 143631167 | CFSA230 | Patient135   | 12/29/14 | MSSA | MSSA |
| 141322333 | CFSA018 | Patient141A  | 5/12/14  | MRSA | MRSA |
| 142250958 | CFSA078 | Patient141B  | 8/13/14  | MRSA | MRSA |

Siblings  
(108,  
109)

|           |         |             |          |      |      |
|-----------|---------|-------------|----------|------|------|
| 143370703 | CFSA148 | Patient141C | 12/3/14  | MRSA | MRSA |
| 151181371 | CFSA320 | Patient141D | 4/29/15  | MRSA | MRSA |
| 152780962 | CFSA276 | Patient141F | 10/5/15  | MRSA | MRSA |
| 160111251 | CFSA287 | Patient141G | 1/11/16  | MRSA | MRSA |
| 141480956 | CFSA017 | Patient145A | 5/28/14  | MRSA | MRSA |
| 142230991 | CFSA076 | Patient145B | 8/11/14  | MRSA | MRSA |
| 143151951 | CFSA147 | Patient145C | 11/11/14 | MRSA | MRSA |
| 150130669 | CFSA242 | Patient146  | 1/13/15  | MSSA | MSSA |
| 142050705 | CFSA042 | Patient149A | 7/24/14  | MRSA | MRSA |
| 143170965 | CFSA165 | Patient149B | 10/13/14 | MRSA | MRSA |
| 141530698 | CFSA016 | Patient150A | 6/2/14   | MRSA | MRSA |
| 142451622 | CFSA072 | Patient150B | 9/4/14   | MRSA | MRSA |
| 150050950 | CFSA234 | Patient150C | 1/5/15   | MRSA | MRSA |
| 142400731 | CFSA086 | Patient152A | 8/28/14  | MRSA | MRSA |
| 150220894 | CFSA252 | Patient152B | 1/22/15  | MRSA | MRSA |
| 143510989 | CFSA196 | Patient157  | 12/17/14 | MSSA | MSSA |
| 143350744 | CFSA132 | Patient158  | 12/3/14  | MSSA | MSSA |
| 142530742 | CFSA081 | Patient159  | 9/10/14  | MSSA | MSSA |
| 160341590 | CFSA368 | Patient161B | 2/3/16   | MRSA | MRSA |
| 150161450 | CFSA248 | Patient164  | 1/16/15  | MSSA | MSSA |
| 150221249 | CFSA254 | Patient167  | 1/22/15  | MSSA | MSSA |
| 150220949 | CFSA253 | Patient171  | 1/22/15  | MSSA | MSSA |
| 152101661 | CFSA360 | Patient173A | 7/29/15  | MRSA | MRSA |
| 160201543 | CFSA357 | Patient173B | 1/20/16  | MRSA | MRSA |
| 142521082 | CFSA090 | Patient176  | 9/9/14   | MSSA | MSSA |
| 150351059 | CFSA218 | Patient177  | 2/4/15   | MRSA | MRSA |
| 150050652 | CFSA235 | Patient179  | 1/5/15   | MSSA | MSSA |
| 150201476 | CFSA249 | Patient180  | 1/20/15  | MSSA | MSSA |
| 141252250 | CFSA015 | Patient181A | 5/5/14   | MRSA | MRSA |
| 143631987 | CFSA233 | Patient181B | 12/29/14 | MRSA | MRSA |
| 141480665 | CFSA014 | Patient183A | 5/28/14  | MRSA | MRSA |
| 142661205 | CFSA107 | Patient183B | 9/26/14  | MRSA | MRSA |
| 150331046 | CFSA216 | Patient183C | 2/2/15   | MRSA | MRSA |
| 152851734 | CFSA291 | Patient183D | 10/12/15 | MRSA | MRSA |
| 153191051 | CFSA332 | Patient183E | 11/16/15 | MRSA | MRSA |
| 141742054 | CFSA043 | Patient184  | 6/23/14  | MRSA | MRSA |
| 150611125 | CFSA229 | Patient187  | 3/2/15   | MRSA | MRSA |
| 141110689 | CFSA013 | Patient189A | 4/24/14  | MRSA | MRSA |

siblings  
(179,  
180)

|           |         |              |          |      |      |                           |
|-----------|---------|--------------|----------|------|------|---------------------------|
| 141531090 | CFSA024 | Patient189B  | 6/2/14   | MRSA | MRSA |                           |
| 142791024 | CFSA110 | Patient189C1 | 10/6/14  | MSSA | MSSA |                           |
| 142791024 | CFSA141 | Patient189C2 | 10/6/14  | MSSA | MSSA |                           |
| 152880917 | CFSA364 | Patient189E  | 10/15/15 | MRSA | MRSA |                           |
| 143221614 | CFSA160 | Patient191   | 11/18/14 | MSSA | MSSA |                           |
| 142390640 | CFSA084 | Patient192A  | 8/27/14  | MRSA | MRSA |                           |
| 143371220 | CFSA159 | Patient192B  | 12/3/14  | MSSA | MRSA |                           |
| 150210850 | CFSA251 | Patient192C  | 1/21/15  | MRSA | MRSA |                           |
| 151680806 | CFSA319 | Patient192D  | 6/17/15  | MRSA | MRSA |                           |
| 152521147 | CFSA348 | Patient192E  | 9/9/15   | MRSA | MRSA |                           |
| 153500846 | CFSA310 | Patient192F  | 12/16/15 | MRSA | MRSA |                           |
| 143350826 | CFSA158 | Patient193   | 12/1/14  | MSSA | MSSA |                           |
| 143221407 | CFSA157 | Patient194   | 11/18/14 | MSSA | MSSA |                           |
| 142161521 | CFSA044 | Patient195   | 8/4/14   | MRSA | MRSA |                           |
| 141541103 | CFSA023 | Patient196A  | 6/3/14   | MRSA | MRSA |                           |
| 143170892 | CFSA146 | Patient196B  | 11/13/14 | MRSA | MRSA |                           |
| 150541430 | CFSA226 | Patient196C  | 2/23/15  | MRSA | MRSA |                           |
| 151871031 | CFSA300 | Patient196D  | 7/6/15   | MRSA | MRSA |                           |
| 153061377 | CFSA280 | Patient196E  | 11/2/15  | MRSA | MRSA |                           |
| 160041188 | CFSA295 | Patient196F  | 1/4/16   | MRSA | MRSA |                           |
| 141910702 | CFSA045 | Patient198   | 7/10/14  | MRSA | MRSA |                           |
| 141900852 | CFSA046 | Patient201A  | 7/9/14   | MRSA | MRSA |                           |
| 142880765 | CFSA116 | Patient201B  | 10/15/14 | MRSA | MRSA |                           |
| 143370666 | CFSA156 | Patient201C  | 12/3/14  | MSSA | MSSA |                           |
| 151331177 | CFSA322 | Patient201D  | 5/13/15  | MRSA | MSSA |                           |
| 153500902 | CFSA285 | Patient201E  | 12/16/15 | MRSA | MRSA |                           |
| 142580969 | CFSA073 | Patient202   | 9/19/14  | MSSA | MSSA |                           |
| 143160920 | CFSA155 | Patient204   | 11/12/14 | MSSA | MSSA | Siblings<br>(204,<br>205) |
| 143510568 | CFSA200 | Patient205   | 12/17/14 | MSSA | MSSA |                           |
| 142041222 | CFSA047 | Patient206   | 7/23/14  | MRSA | MRSA | Siblings<br>(206,<br>207) |
| 142041224 | CFSA048 | Patient207   | 7/23/14  | MRSA | MRSA |                           |
| 143501086 | CFSA201 | Patient208   | 12/16/14 | MSSA | MSSA |                           |
| 142091813 | CFSA049 | Patient210   | 7/28/14  | MSSA | MSSA |                           |
| 143361825 | CFSA145 | Patient213A  | 12/2/14  | MRSA | MRSA |                           |
| 150411045 | CFSA220 | Patient213B  | 2/10/15  | MRSA | MRSA |                           |
| 143492256 | CFSA203 | Patient215   | 12/15/14 | MSSA | MSSA |                           |
| 141110955 | CFSA022 | Patient217A  | 4/24/14  | MRSA | MRSA |                           |
| 141541208 | CFSA021 | Patient217B  | 6/3/14   | MRSA | MRSA |                           |

|           |         |             |          |      |      |
|-----------|---------|-------------|----------|------|------|
| 142611705 | CFSA154 | Patient217C | 9/18/14  | MRSA | MRSA |
| 142651144 | CFSA106 | Patient217D | 9/22/14  | MRSA | MRSA |
| 143361089 | CFSA144 | Patient217E | 12/2/14  | MRSA | MRSA |
| 150841974 | CFSA212 | Patient217F | 3/25/15  | MRSA | MRSA |
| 152431277 | CFSA278 | Patient217H | 8/31/15  | MRSA | MRSA |
| 153130894 | CFSA298 | Patient217I | 11/9/15  | MRSA | MRSA |
| 160111742 | CFSA    | Patient217J | 1/11/16  | MRSA | MRSA |
| 141321890 | CFSA020 | Patient218A | 5/12/14  | MRSA | MRSA |
| 150471486 | CFSA222 | Patient218B | 2/16/15  | MRSA | MRSA |
| 141401011 | CFSA019 | Patient220A | 5/20/14  | MRSA | MRSA |
| 143042214 | CFSA153 | Patient220B | 10/31/14 | MSSA | MSSA |
| 141420930 | CFSA029 | Patient222A | 5/22/14  | MRSA | MRSA |
| 142400928 | CFSA083 | Patient222B | 8/28/14  | MRSA | MRSA |
| 143141847 | CFSA143 | Patient222C | 11/10/14 | MRSA | MRSA |
| 150341057 | CFSA217 | Patient222D | 2/3/15   | MRSA | MRSA |
| 151320812 | CFSA336 | Patient222E | 5/12/15  | MRSA | MRSA |
| 152821713 | CFSA270 | Patient222F | 10/9/15  | MRSA | MRSA |
| 141391455 | CFSA030 | Patient224A | 5/19/14  | MRSA | MRSA |
| 143360959 | CFSA142 | Patient224B | 12/2/14  | MRSA | MRSA |
| 141321023 | CFSA028 | Patient230A | 5/12/14  | MRSA | MRSA |
| 142521190 | CFSA092 | Patient230B | 9/9/14   | MRSA | MRSA |
| 150271154 | CFSA258 | Patient230C | 1/27/15  | MRSA | MRSA |
| 151121513 | CFSA327 | Patient230D | 4/22/15  | MRSA | MRSA |
| 152081838 | CFSA339 | Patient230E | 7/27/15  | MRSA | MRSA |
| 152770684 | CFSA351 | Patient230F | 10/4/15  | MRSA | MRSA |
| 160042020 | CFSA338 | Patient230G | 1/4/16   | MRSA | MRSA |
| 142020889 | CFSA050 | Patient232A | 7/21/14  | MRSA | MRSA |
| 143090896 | CFSA151 | Patient232B | 11/5/14  | MRSA | MRSA |
| 150760819 | CFSA205 | Patient232C | 3/17/15  | MRSA | MRSA |
| 152292383 | CFSA275 | Patient232D | 8/17/15  | MRSA | MRSA |
| 153551341 | CFSA326 | Patient232E | 12/21/15 | MRSA | MRSA |
| 143291477 | CFSA152 | Patient233  | 11/25/14 | MSSA | MSSA |
| 141270948 | CFSA027 | Patient235A | 5/7/14   | MRSA | MRSA |
| 142530883 | CFSA075 | Patient235B | 9/10/14  | MRSA | MRSA |
| 150071403 | CFSA240 | Patient235C | 1/7/15   | MRSA | MRSA |
| 152170980 | CFSA292 | Patient235E | 8/5/15   | MRSA | MRSA |
| 160130867 | CFSA305 | Patient235F | 1/13/16  | MRSA | MRSA |
| 142791380 | CFSA170 | Patient236A | 10/6/14  | MRSA | MRSA |

|           |         |              |          |      |      |                           |
|-----------|---------|--------------|----------|------|------|---------------------------|
| 150051314 | CFSA236 | Patient236B  | 1/5/15   | MRSA | MRSA |                           |
| 143510795 | CFSA198 | Patient238   | 12/17/14 | MSSA | MSSA |                           |
| 141770837 | CFSA051 | Patient241   | 6/26/14  | MRSA | MRSA | Siblings<br>(241,<br>242) |
| 141770838 | CFSA052 | Patient242   | 6/26/14  | MRSA | MRSA |                           |
| 141890830 | CFSA053 | Patient246A  | 7/8/14   | MRSA | MRSA |                           |
| 142791383 | CFSA112 | Patient246B  | 10/6/14  | MRSA | MRSA |                           |
| 150270931 | CFSA257 | Patient246C  | 1/26/15  | MRSA | MRSA |                           |
| 151871443 | CFSA340 | Patient246D  | 7/6/15   | MRSA | MRSA |                           |
| 152781594 | CFSA312 | Patient246E  | 10/5/15  | MRSA | MRSA | Siblings<br>(246,<br>247) |
| 141890831 | CFSA054 | Patient247A  | 7/8/14   | MRSA | MRSA |                           |
| 142791167 | CFSA111 | Patient247B  | 10/6/14  | MRSA | MRSA |                           |
| 150261256 | CFSA255 | Patient247C  | 1/26/15  | MRSA | MRSA |                           |
| 151870948 | CFSA297 | Patient247D  | 7/6/15   | MRSA | MRSA |                           |
| 152781603 | CFSA271 | Patient247E  | 10/5/15  | MRSA | MRSA |                           |
| 143421615 | CFSA187 | Patient251   | 12/8/14  | MRSA | MRSA |                           |
| 142891031 | CFSA169 | Patient252A  | 10/16/14 | MRSA | MRSA |                           |
| 150990996 | CFSA341 | Patient252B  | 4/9/15   | MRSA | MRSA |                           |
| 152320941 | CFSA283 | Patient252D  | 8/20/15  | MRSA | MRSA |                           |
| 153510813 | CFSA279 | Patient252F  | 12/16/15 | MRSA | MRSA |                           |
| 142581059 | CFSA071 | Patient254   | 9/19/14  | MSSA | MSSA |                           |
| 141251737 | CFSA026 | Patient258A1 | 5/5/14   | MRSA | MRSA |                           |
| 141251737 | CFSA032 | Patient258A2 | 5/5/14   | MRSA | MRSA |                           |
| 142231024 | CFSA082 | Patient258B  | 8/11/14  | MRSA | MRSA |                           |
| 142811273 | CFSA113 | Patient258C1 | 10/8/14  | MSSA | MSSA |                           |
| 142811273 | CFSA161 | Patient258C2 | 10/8/14  | MSSA | MSSA |                           |
| 143281153 | CFSA167 | Patient258D  | 11/24/14 | MRSA | MRSA |                           |
| 150471150 | CFSA221 | Patient258E  | 2/16/15  | MRSA | MRSA |                           |
| 151351605 | CFSA302 | Patient258F  | 5/15/15  | MRSA | MRSA |                           |
| 152361340 | CFSA309 | Patient258G  | 8/24/15  | MRSA | MRSA |                           |
| 141151016 | CFSA025 | Patient261A  | 4/29/14  | MRSA | MRSA |                           |
| 142261804 | CFSA077 | Patient261B  | 8/14/14  | MRSA | MRSA |                           |
| 143300653 | CFSA168 | Patient261C  | 11/26/14 | MRSA | MRSA |                           |
| 150851880 | CFSA214 | Patient261D  | 3/26/15  | MRSA | MRSA |                           |
| 151540945 | CFSA346 | Patient261E  | 6/3/15   | MRSA | MRSA |                           |
| 153491886 | CFSA286 | Patient261G  | 12/16/15 | MRSA | MRSA |                           |
| 141131288 | CFSA031 | Patient263A  | 4/28/14  | MRSA | MRSA |                           |
| 143161095 | CFSA166 | Patient263B  | 11/12/14 | MRSA | MRSA |                           |
| 160061197 | CFSA363 | Patient265   | 1/6/16   |      | MRSA |                           |



Accession number is a unique identifier for each isolate. SampleID is a unique identifier for each genome sequence. PatientNo identifies the patient from which the isolate was obtained, with letter suffixes indicating isolates taken at different times from the same patient.

Blocks of samples from the same patient are shaded in blue. Samples from the same patient and with the same accession number (shown in red) are replicate sequences of the same isolate and have PatientNo such as Patient021A1 and 021A2. MRSA = methicillin resistant, MSSA = methicillin sensitive. **Obs MRMS** is Observed MRSA or MSSA phenotype. **Predic MRMS** is the MRSA or MSSA phenotype predicted by the program PPF2.
