# Supplementary material
Source: PubMed Central journal article supplement (PMC5483916)
Supplement: JCM.00164-17_zjm999095555s7.pdf [file JCM.00164-17_zjm999095555s7.pdf]

**Table S4.** Number of SNP differences between pairs of isolates from CF patients

| <b>SNP differences</b> | <b>Isolate 1</b> | <b>Isolate 2</b> |
|------------------------|------------------|------------------|
| 0                      | Patient053A1     | Patient053A2     |
| 0                      | Patient258C1     | Patient258C2     |
| 1                      | Patient196A      | Patient196B      |
| 1                      | Patient217B      | Patient217D      |
| 1                      | Patient217C      | Patient217D      |
| 2                      | Patient007A      | Patient007B      |
| 2                      | Patient034D      | Patient034E      |
| 2                      | Patient053A1     | Patient053B      |
| 2                      | Patient053A2     | Patient053B      |
| 2                      | Patient079A1     | Patient079A2     |
| 2                      | Patient081A1     | Patient081A2     |
| 2                      | Patient089A1     | Patient089A2     |
| 2                      | Patient217B      | Patient217C      |
| 2                      | Patient222B      | Patient222C      |
| 2                      | Patient258A1     | Patient258A2     |
| 2                      | Patient258B      | Patient258E      |
| 2                      | Patient258B      | Patient258G      |
| 2                      | Patient258D      | Patient258G      |
| 2                      | Patient258E      | Patient258G      |
| 3                      | Patient053A1     | Patient053C      |
| 3                      | Patient053A2     | Patient053C      |
| 3                      | Patient079A1     | Patient079B      |
| 3                      | Patient099C      | Patient099D      |
| 3                      | Patient108G      | Patient108H      |
| 3                      | Patient109C      | Patient109E      |
| 3                      | Patient196B      | Patient196F      |
| 3                      | Patient201C      | Patient201D      |
| 3                      | Patient217B      | Patient217E      |
| 3                      | Patient217C      | Patient217E      |
| 3                      | Patient217C      | Patient217F      |
| 3                      | Patient217C      | Patient217H      |
| 3                      | Patient258B      | Patient258D      |
| 3                      | Patient258D      | Patient258E      |
| 3                      | Patient261A      | Patient261B      |
| 4                      | Patient079A1     | Patient079C      |
| 4                      | Patient079B      | Patient079C      |
| 4                      | Patient097C      | Patient097D      |
| 4                      | Patient189A      | Patient189B      |
| 4                      | Patient189C1     | Patient189C2     |
| 4                      | Patient217A      | Patient217C      |
| 4                      | Patient217A      | Patient217D      |
| 4                      | Patient217B      | Patient217F      |
| 4                      | Patient217D      | Patient217E      |
| 4                      | Patient217D      | Patient217H      |
| 4                      | Patient217E      | Patient217F      |
| 4                      | Patient230C      | Patient230E      |
| 4                      | Patient235C      | Patient235F      |

|   |              |              |
|---|--------------|--------------|
| 4 | Patient236A  | Patient236B  |
| 4 | Patient258B  | Patient258F  |
| 4 | Patient258E  | Patient258F  |
| 4 | Patient258F  | Patient258G  |
| 5 | Patient021A1 | Patient021A2 |
| 5 | Patient053B  | Patient053C  |
| 5 | Patient099C  | Patient099E  |
| 5 | Patient150A  | Patient150B  |
| 5 | Patient196A  | Patient196F  |
| 5 | Patient201A  | Patient201B  |
| 5 | Patient217A  | Patient217B  |
| 5 | Patient217B  | Patient217H  |
| 5 | Patient217D  | Patient217F  |
| 5 | Patient222A  | Patient222C  |
| 5 | Patient230D  | Patient230E  |
| 5 | Patient232B  | Patient232D  |
| 5 | Patient258A1 | Patient258B  |
| 5 | Patient258D  | Patient258F  |
| 6 | Patient066E  | Patient066F  |
| 6 | Patient079A2 | Patient079B  |
| 6 | Patient079A2 | Patient079C  |
| 6 | Patient086A  | Patient086C  |
| 6 | Patient097C  | Patient097E  |
| 6 | Patient097D  | Patient097E  |
| 6 | Patient099D  | Patient099E  |
| 6 | Patient108B1 | Patient108B2 |
| 6 | Patient109C  | Patient109D  |
| 6 | Patient109D  | Patient109E  |
| 6 | Patient126A  | Patient126C  |
| 6 | Patient126D  | Patient126E  |
| 6 | Patient173A  | Patient173B  |
| 6 | Patient196B  | Patient196C  |
| 6 | Patient196B  | Patient196E  |
| 6 | Patient217E  | Patient217H  |
| 6 | Patient224A  | Patient224B  |
| 6 | Patient230C  | Patient230D  |
| 6 | Patient230E  | Patient230F  |
| 6 | Patient232A  | Patient232B  |
| 6 | Patient232B  | Patient232E  |
| 6 | Patient232D  | Patient232E  |
| 6 | Patient247C  | Patient247E  |
| 6 | Patient258A1 | Patient258E  |
| 6 | Patient258A1 | Patient258G  |
| 6 | Patient258A2 | Patient258B  |
| 6 | Patient261B  | Patient261E  |
| 6 | Patient263A  | Patient263B  |
| 7 | Patient032C  | Patient032E  |
| 7 | Patient034A  | Patient034E  |
| 7 | Patient045A  | Patient045B  |
| 7 | Patient081A2 | Patient081D  |

|   |              |             |
|---|--------------|-------------|
| 7 | Patient081E  | Patient081F |
| 7 | Patient086B  | Patient086C |
| 7 | Patient099A  | Patient100A |
| 7 | Patient099B  | Patient099E |
| 7 | Patient196A  | Patient196C |
| 7 | Patient196A  | Patient196E |
| 7 | Patient196C  | Patient196F |
| 7 | Patient217A  | Patient217E |
| 7 | Patient217A  | Patient217H |
| 7 | Patient217F  | Patient217H |
| 7 | Patient222A  | Patient222F |
| 7 | Patient230C  | Patient230F |
| 7 | Patient232A  | Patient232E |
| 7 | Patient232B  | Patient232C |
| 8 | Patient081A1 | Patient081D |
| 8 | Patient086A  | Patient086E |
| 8 | Patient099B  | Patient099C |
| 8 | Patient099B  | Patient100A |
| 8 | Patient127A  | Patient127B |
| 8 | Patient150A  | Patient150C |
| 8 | Patient189A  | Patient189E |
| 8 | Patient217A  | Patient217F |
| 8 | Patient222A  | Patient222B |
| 8 | Patient232A  | Patient232D |
| 8 | Patient232C  | Patient232D |
| 8 | Patient235C  | Patient235E |
| 8 | Patient235E  | Patient235F |
| 8 | Patient247B  | Patient247E |
| 8 | Patient258A1 | Patient258D |
| 8 | Patient258A2 | Patient258E |
| 8 | Patient258A2 | Patient258G |
| 9 | Patient034A  | Patient034D |
| 9 | Patient045B  | Patient045C |
| 9 | Patient086A  | Patient086B |
| 9 | Patient097A  | Patient097C |
| 9 | Patient099A  | Patient099B |
| 9 | Patient099A  | Patient099E |
| 9 | Patient099B  | Patient099D |
| 9 | Patient123B  | Patient123C |
| 9 | Patient150B  | Patient150C |
| 9 | Patient152A  | Patient152B |
| 9 | Patient196E  | Patient196F |
| 9 | Patient222A  | Patient222E |
| 9 | Patient222C  | Patient222F |
| 9 | Patient230D  | Patient230F |
| 9 | Patient232A  | Patient232C |
| 9 | Patient247A  | Patient247B |
| 9 | Patient247A  | Patient247E |
| 9 | Patient247B  | Patient247C |
| 9 | Patient252A  | Patient252B |

|    |              |             |
|----|--------------|-------------|
| 9  | Patient258A1 | Patient258F |
| 9  | Patient258A2 | Patient258D |
| 9  | Patient261A  | Patient261E |
| 10 | Patient045A  | Patient045C |
| 10 | Patient066D  | Patient066E |
| 10 | Patient086C  | Patient086E |
| 10 | Patient094D  | Patient094E |
| 10 | Patient097A  | Patient097D |
| 10 | Patient099A  | Patient099C |
| 10 | Patient179   | Patient180  |
| 10 | Patient189B  | Patient189E |
| 10 | Patient196C  | Patient196E |
| 10 | Patient217B  | Patient217I |
| 10 | Patient217C  | Patient217I |
| 10 | Patient232C  | Patient232E |
| 10 | Patient247A  | Patient247C |
| 10 | Patient258A2 | Patient258F |
| 11 | Patient032D  | Patient032E |
| 11 | Patient034A  | Patient034C |
| 11 | Patient066D  | Patient066F |
| 11 | Patient086B  | Patient086E |
| 11 | Patient092A  | Patient092B |
| 11 | Patient123A  | Patient123C |
| 11 | Patient183C  | Patient183E |
| 11 | Patient217D  | Patient217I |
| 11 | Patient217E  | Patient217I |
| 11 | Patient222B  | Patient222F |
| 11 | Patient222E  | Patient222F |
| 12 | Patient032A  | Patient032D |
| 12 | Patient034C  | Patient034D |
| 12 | Patient034C  | Patient034E |
| 12 | Patient074C  | Patient074D |
| 12 | Patient092C  | Patient092H |
| 12 | Patient092G  | Patient092H |
| 12 | Patient093A  | Patient094B |
| 12 | Patient093A  | Patient094C |
| 12 | Patient097A  | Patient097E |
| 12 | Patient099E  | Patient100A |
| 12 | Patient104A  | Patient104B |
| 12 | Patient123A  | Patient123B |
| 12 | Patient141A  | Patient141C |
| 12 | Patient141B  | Patient141G |
| 12 | Patient181A  | Patient181B |
| 12 | Patient217F  | Patient217I |
| 12 | Patient218A  | Patient218B |
| 12 | Patient222A  | Patient222D |
| 13 | Patient026D  | Patient026E |
| 13 | Patient032A  | Patient032E |
| 13 | Patient074A  | Patient074B |
| 13 | Patient092A  | Patient092H |

|    |              |              |
|----|--------------|--------------|
| 13 | Patient092D  | Patient092H  |
| 13 | Patient099A  | Patient099D  |
| 13 | Patient099C  | Patient100A  |
| 13 | Patient145B  | Patient145C  |
| 13 | Patient183A  | Patient183C  |
| 13 | Patient217H  | Patient217I  |
| 13 | Patient222C  | Patient222E  |
| 13 | Patient222D  | Patient222E  |
| 14 | Patient032A  | Patient032B  |
| 14 | Patient074A  | Patient074C  |
| 14 | Patient093B  | Patient093C  |
| 14 | Patient097A  | Patient097B  |
| 14 | Patient099D  | Patient100A  |
| 14 | Patient108A  | Patient108B1 |
| 14 | Patient108A  | Patient108B2 |
| 14 | Patient108B2 | Patient108D  |
| 14 | Patient149A  | Patient149B  |
| 14 | Patient217A  | Patient217I  |
| 14 | Patient222B  | Patient222E  |
| 14 | Patient222C  | Patient222D  |
| 14 | Patient247A  | Patient247D  |
| 14 | Patient252B  | Patient252F  |
| 15 | Patient092C  | Patient092D  |
| 15 | Patient092D  | Patient092G  |
| 15 | Patient094B  | Patient094C  |
| 15 | Patient217B  | Patient217J  |
| 15 | Patient217I  | Patient217J  |
| 15 | Patient222D  | Patient222F  |
| 15 | Patient252A  | Patient252F  |
| 15 | Patient261C  | Patient261G  |
| 16 | Patient032C  | Patient032D  |
| 16 | Patient092A  | Patient092C  |
| 16 | Patient092C  | Patient092G  |
| 16 | Patient103D  | Patient103E  |
| 16 | Patient141B  | Patient141C  |
| 16 | Patient141B  | Patient141F  |
| 16 | Patient201B  | Patient201E  |
| 16 | Patient217C  | Patient217J  |
| 16 | Patient217D  | Patient217J  |
| 16 | Patient222B  | Patient222D  |
| 17 | Patient032A  | Patient034A  |
| 17 | Patient032D  | Patient034A  |
| 17 | Patient074B  | Patient074C  |
| 17 | Patient092A  | Patient092G  |
| 17 | Patient094A  | Patient094D  |
| 17 | Patient108A  | Patient108D  |
| 17 | Patient108B1 | Patient108D  |
| 17 | Patient123A  | Patient123D  |
| 17 | Patient217E  | Patient217J  |
| 17 | Patient217F  | Patient217J  |

|    |              |             |
|----|--------------|-------------|
| 18 | Patient026B  | Patient026F |
| 18 | Patient032A  | Patient034D |
| 18 | Patient032A  | Patient034E |
| 18 | Patient032B  | Patient032D |
| 18 | Patient081A1 | Patient081B |
| 18 | Patient081A2 | Patient081B |
| 18 | Patient092A  | Patient092D |
| 18 | Patient092B  | Patient092H |
| 18 | Patient097B  | Patient097D |
| 18 | Patient108A  | Patient109A |
| 18 | Patient108B1 | Patient109A |
| 18 | Patient108B2 | Patient109A |
| 18 | Patient183A  | Patient183E |
| 18 | Patient230E  | Patient230G |
| 18 | Patient235B  | Patient235C |
| 18 | Patient247C  | Patient247D |
| 19 | Patient032A  | Patient032C |
| 19 | Patient032B  | Patient032E |
| 19 | Patient032B  | Patient034A |
| 19 | Patient081A2 | Patient081C |
| 19 | Patient081B  | Patient081C |
| 19 | Patient092B  | Patient092C |
| 19 | Patient094A  | Patient094E |
| 19 | Patient097B  | Patient097C |
| 19 | Patient230A  | Patient230G |
| 19 | Patient230C  | Patient230G |
| 19 | Patient230D  | Patient230G |
| 19 | Patient235B  | Patient235F |
| 19 | Patient247B  | Patient247D |
| 20 | Patient032D  | Patient034E |
| 20 | Patient032E  | Patient034A |
| 20 | Patient081A1 | Patient081C |
| 20 | Patient081B  | Patient081D |
| 20 | Patient092B  | Patient092D |
| 20 | Patient108B1 | Patient109B |
| 20 | Patient108B2 | Patient108G |
| 20 | Patient108B2 | Patient109B |
| 20 | Patient120B  | Patient120C |
| 20 | Patient141A  | Patient141B |
| 20 | Patient192B  | Patient192E |
| 20 | Patient217A  | Patient217J |
| 20 | Patient217H  | Patient217J |
| 20 | Patient230F  | Patient230G |
| 21 | Patient032A  | Patient034C |
| 21 | Patient092B  | Patient092G |
| 21 | Patient097B  | Patient097E |
| 21 | Patient108A  | Patient108G |
| 21 | Patient108B1 | Patient108G |
| 21 | Patient121A  | Patient121B |
| 21 | Patient183B  | Patient183D |

|    |              |             |
|----|--------------|-------------|
| 21 | Patient201A  | Patient201E |
| 21 | Patient252B  | Patient252D |
| 22 | Patient032B  | Patient034D |
| 22 | Patient032B  | Patient034E |
| 22 | Patient032D  | Patient034D |
| 22 | Patient032E  | Patient034D |
| 22 | Patient032E  | Patient034E |
| 22 | Patient074A  | Patient074D |
| 22 | Patient093A  | Patient093E |
| 22 | Patient108A  | Patient108H |
| 22 | Patient108D  | Patient108G |
| 22 | Patient108H  | Patient109C |
| 22 | Patient123C  | Patient123D |
| 23 | Patient074B  | Patient074D |
| 23 | Patient108B2 | Patient108H |
| 23 | Patient108B2 | Patient109D |
| 23 | Patient108B2 | Patient109E |
| 23 | Patient108G  | Patient109D |
| 23 | Patient108G  | Patient109E |
| 23 | Patient120A  | Patient120C |
| 23 | Patient141C  | Patient141G |
| 23 | Patient141F  | Patient141G |
| 23 | Patient235B  | Patient235E |
| 24 | Patient032B  | Patient032C |
| 24 | Patient032B  | Patient034C |
| 24 | Patient032D  | Patient034C |
| 24 | Patient081C  | Patient081D |
| 24 | Patient093A  | Patient093D |
| 24 | Patient108A  | Patient109B |
| 24 | Patient108B1 | Patient108H |
| 24 | Patient108D  | Patient109A |
| 24 | Patient108H  | Patient109E |
| 24 | Patient123B  | Patient123D |
| 24 | Patient247D  | Patient247E |
| 25 | Patient032C  | Patient034A |
| 25 | Patient032C  | Patient034D |
| 25 | Patient093E  | Patient094B |
| 25 | Patient108B1 | Patient109E |
| 25 | Patient108D  | Patient108H |
| 25 | Patient108D  | Patient109B |
| 25 | Patient108G  | Patient109C |
| 25 | Patient108H  | Patient109D |
| 25 | Patient141C  | Patient141D |
| 25 | Patient230A  | Patient230C |
| 25 | Patient230B  | Patient230G |
| 26 | Patient032E  | Patient034C |
| 26 | Patient093D  | Patient093E |
| 26 | Patient093D  | Patient094B |
| 26 | Patient103B  | Patient103C |
| 26 | Patient108A  | Patient109D |

|    |              |             |
|----|--------------|-------------|
| 26 | Patient108B2 | Patient108F |
| 26 | Patient108B2 | Patient109C |
| 26 | Patient108F  | Patient108G |
| 26 | Patient109A  | Patient109B |
| 26 | Patient120A  | Patient120B |
| 26 | Patient141B  | Patient141D |
| 26 | Patient145A  | Patient145B |
| 26 | Patient196A  | Patient196D |
| 27 | Patient032C  | Patient034E |
| 27 | Patient108B1 | Patient109C |
| 27 | Patient108B1 | Patient109D |
| 27 | Patient108D  | Patient109E |
| 27 | Patient108F  | Patient108H |
| 27 | Patient108G  | Patient109A |
| 27 | Patient141C  | Patient141F |
| 27 | Patient145A  | Patient145C |
| 27 | Patient196B  | Patient196D |
| 27 | Patient252A  | Patient252D |
| 28 | Patient093E  | Patient094C |
| 28 | Patient108A  | Patient109C |
| 28 | Patient108A  | Patient109E |
| 28 | Patient108B1 | Patient108F |
| 28 | Patient192A  | Patient192B |
| 28 | Patient230A  | Patient230D |
| 28 | Patient230A  | Patient230E |
| 28 | Patient252D  | Patient252F |
| 29 | Patient026C  | Patient026D |
| 29 | Patient108D  | Patient109D |
| 29 | Patient108G  | Patient109B |
| 29 | Patient108H  | Patient109A |
| 29 | Patient141A  | Patient141G |
| 29 | Patient196D  | Patient196F |
| 30 | Patient032C  | Patient034C |
| 30 | Patient074B  | Patient074E |
| 30 | Patient093D  | Patient094C |
| 30 | Patient108D  | Patient109C |
| 30 | Patient108F  | Patient109E |
| 30 | Patient206   | Patient207  |
| 31 | Patient074A  | Patient074E |
| 31 | Patient093B  | Patient094A |
| 31 | Patient108A  | Patient108F |
| 31 | Patient108D  | Patient108F |
| 31 | Patient108H  | Patient109B |
| 31 | Patient141A  | Patient141D |
| 31 | Patient141D  | Patient141G |
| 31 | Patient196C  | Patient196D |
| 31 | Patient230A  | Patient230F |
| 32 | Patient081A1 | Patient081E |
| 32 | Patient109A  | Patient109D |
| 32 | Patient230B  | Patient230C |



|    |              |              |
|----|--------------|--------------|
| 32 | Patient261B  | Patient261C  |
| 32 | Patient261C  | Patient261E  |
| 33 | Patient093B  | Patient094D  |
| 33 | Patient108F  | Patient109C  |
| 33 | Patient141A  | Patient141F  |
| 33 | Patient196D  | Patient196E  |
| 33 | Patient261A  | Patient261D  |
| 34 | Patient026D  | Patient026F  |
| 34 | Patient081A2 | Patient081E  |
| 34 | Patient081B  | Patient081E  |
| 34 | Patient109A  | Patient109C  |
| 34 | Patient109A  | Patient109E  |
| 34 | Patient109B  | Patient109C  |
| 34 | Patient109B  | Patient109E  |
| 34 | Patient261A  | Patient261C  |
| 34 | Patient261B  | Patient261D  |
| 35 | Patient026B  | Patient026D  |
| 35 | Patient074C  | Patient074E  |
| 35 | Patient081C  | Patient081E  |
| 35 | Patient093C  | Patient094A  |
| 35 | Patient141D  | Patient141F  |
| 35 | Patient230B  | Patient230E  |
| 36 | Patient081D  | Patient081E  |
| 36 | Patient088   | Patient089A1 |
| 36 | Patient093C  | Patient094D  |
| 36 | Patient108F  | Patient109D  |
| 36 | Patient109B  | Patient109D  |
| 36 | Patient230A  | Patient230B  |
| 36 | Patient230B  | Patient230D  |
| 36 | Patient246C  | Patient246D  |
| 37 | Patient026C  | Patient026E  |
| 37 | Patient081A1 | Patient081F  |
| 37 | Patient081A2 | Patient081F  |
| 37 | Patient081B  | Patient081F  |
| 37 | Patient081D  | Patient081F  |
| 37 | Patient088   | Patient089A2 |
| 37 | Patient093A  | Patient093B  |
| 37 | Patient093B  | Patient093D  |
| 37 | Patient093B  | Patient094E  |
| 37 | Patient108F  | Patient109A  |
| 37 | Patient108F  | Patient109B  |
| 37 | Patient183B  | Patient183C  |
| 38 | Patient081C  | Patient081F  |
| 38 | Patient093B  | Patient093E  |
| 38 | Patient230B  | Patient230F  |
| 39 | Patient093B  | Patient094B  |
| 39 | Patient093C  | Patient094E  |
| 39 | Patient103A  | Patient103C  |
| 39 | Patient261C  | Patient261D  |
| 39 | Patient261D  | Patient261E  |

|    |             |             |
|----|-------------|-------------|
| 40 | Patient026A | Patient026F |
| 40 | Patient093A | Patient093C |
| 40 | Patient093A | Patient094A |
| 41 | Patient026E | Patient026F |
| 41 | Patient074D | Patient074E |
| 41 | Patient092A | Patient092E |
| 41 | Patient093C | Patient093E |
| 41 | Patient093E | Patient094A |
| 41 | Patient261B | Patient261G |
| 41 | Patient261E | Patient261G |
| 42 | Patient026A | Patient026B |
| 42 | Patient026B | Patient026E |
| 42 | Patient026C | Patient026F |
| 42 | Patient032A | Patient034B |
| 42 | Patient092B | Patient092E |
| 42 | Patient093C | Patient093D |
| 42 | Patient192A | Patient192E |
| 42 | Patient235A | Patient235B |
| 42 | Patient235A | Patient235C |
| 43 | Patient026B | Patient026C |
| 43 | Patient120B | Patient120D |
| 43 | Patient183A | Patient183B |
| 43 | Patient183B | Patient183E |
| 43 | Patient183C | Patient183D |
| 43 | Patient192B | Patient192F |
| 43 | Patient246A | Patient246C |
| 44 | Patient093B | Patient094C |
| 44 | Patient093C | Patient094B |
| 44 | Patient093D | Patient094A |
| 44 | Patient261A | Patient261G |
| 45 | Patient032D | Patient034B |
| 45 | Patient094A | Patient094B |
| 45 | Patient120A | Patient120D |
| 46 | Patient032B | Patient034B |
| 46 | Patient032E | Patient034B |
| 46 | Patient034A | Patient034B |
| 46 | Patient092E | Patient092H |
| 46 | Patient093A | Patient094D |
| 46 | Patient103A | Patient103B |
| 46 | Patient192A | Patient192F |
| 47 | Patient093E | Patient094D |
| 47 | Patient094A | Patient094C |
| 47 | Patient120C | Patient120D |
| 47 | Patient183A | Patient183D |
| 47 | Patient235A | Patient235F |
| 48 | Patient034B | Patient034E |
| 48 | Patient092D | Patient092E |
| 48 | Patient093E | Patient094E |
| 48 | Patient183D | Patient183E |
| 48 | Patient261D | Patient261G |

|    |              |             |
|----|--------------|-------------|
| 49 | Patient034B  | Patient034D |
| 49 | Patient093C  | Patient094C |
| 49 | Patient093D  | Patient094D |
| 49 | Patient246A  | Patient246B |
| 50 | Patient092C  | Patient092E |
| 50 | Patient092E  | Patient092G |
| 50 | Patient093A  | Patient094E |
| 50 | Patient094B  | Patient094D |
| 50 | Patient246A  | Patient246E |
| 51 | Patient032C  | Patient034B |
| 51 | Patient235A  | Patient235E |
| 52 | Patient034B  | Patient034C |
| 53 | Patient026A  | Patient026D |
| 53 | Patient093D  | Patient094E |
| 53 | Patient094C  | Patient094D |
| 53 | Patient246C  | Patient246E |
| 55 | Patient246B  | Patient246C |
| 56 | Patient094B  | Patient094E |
| 56 | Patient246A  | Patient246D |
| 57 | Patient192E  | Patient192F |
| 58 | Patient094C  | Patient094E |
| 59 | Patient026A  | Patient026C |
| 60 | Patient026A  | Patient026E |
| 60 | Patient246B  | Patient246E |
| 64 | Patient192A  | Patient192C |
| 69 | Patient246D  | Patient246E |
| 70 | Patient246B  | Patient246D |
| 71 | Patient192B  | Patient192C |
| 79 | Patient127A  | Patient184  |
| 79 | Patient246A  | Patient247A |
| 79 | Patient246A  | Patient247B |
| 79 | Patient246A  | Patient247C |
| 80 | Patient079A1 | Patient184  |
| 81 | Patient079A1 | Patient127A |
| 81 | Patient246A  | Patient247E |
| 82 | Patient079C  | Patient184  |
| 83 | Patient079A2 | Patient184  |
| 83 | Patient079C  | Patient127A |
| 83 | Patient127B  | Patient184  |
| 83 | Patient149B  | Patient184  |
| 84 | Patient079A2 | Patient127A |
| 84 | Patient246C  | Patient247C |
| 85 | Patient079A1 | Patient127B |
| 85 | Patient079B  | Patient184  |
| 85 | Patient079C  | Patient127B |
| 85 | Patient192C  | Patient192E |
| 86 | Patient079B  | Patient127A |
| 86 | Patient246C  | Patient247A |
| 87 | Patient246C  | Patient247B |
| 88 | Patient079A2 | Patient127B |

|     |              |             |
|-----|--------------|-------------|
| 88  | Patient079B  | Patient127B |
| 88  | Patient079C  | Patient236B |
| 89  | Patient192C  | Patient192F |
| 90  | Patient079A1 | Patient236B |
| 90  | Patient246A  | Patient247D |
| 91  | Patient246C  | Patient247E |
| 91  | Patient246E  | Patient247A |
| 92  | Patient079A2 | Patient236B |
| 92  | Patient246E  | Patient247B |
| 93  | Patient079C  | Patient236A |
| 93  | Patient127A  | Patient220A |
| 93  | Patient246B  | Patient247B |
| 93  | Patient246E  | Patient247C |
| 94  | Patient079A1 | Patient149B |
| 94  | Patient079A1 | Patient220A |
| 94  | Patient079A1 | Patient236A |
| 94  | Patient079B  | Patient236B |
| 94  | Patient079C  | Patient149B |
| 94  | Patient184   | Patient220A |
| 94  | Patient246B  | Patient247A |
| 94  | Patient246B  | Patient247C |
| 95  | Patient079A2 | Patient220A |
| 95  | Patient149A  | Patient184  |
| 96  | Patient079A2 | Patient149B |
| 96  | Patient079C  | Patient220A |
| 96  | Patient127A  | Patient149B |
| 96  | Patient127B  | Patient220A |
| 96  | Patient246E  | Patient247E |
| 97  | Patient079A1 | Patient265  |
| 97  | Patient079A2 | Patient236A |
| 97  | Patient079B  | Patient149B |
| 97  | Patient079B  | Patient220A |
| 97  | Patient079C  | Patient263A |
| 97  | Patient079C  | Patient265  |
| 97  | Patient127A  | Patient236B |
| 98  | Patient079A1 | Patient263A |
| 98  | Patient079B  | Patient236A |
| 98  | Patient246B  | Patient247E |
| 99  | Patient079A1 | Patient263B |
| 99  | Patient079A2 | Patient265  |
| 99  | Patient079B  | Patient265  |
| 99  | Patient079C  | Patient263B |
| 99  | Patient127A  | Patient236A |
| 99  | Patient127B  | Patient236B |
| 99  | Patient181A  | Patient230G |
| 99  | Patient184   | Patient236B |
| 99  | Patient236B  | Patient265  |
| 99  | Patient246C  | Patient247D |
| 100 | Patient079A2 | Patient263A |
| 100 | Patient127B  | Patient149B |

|     |              |             |
|-----|--------------|-------------|
| 100 | Patient246D  | Patient247A |
| 100 | Patient246D  | Patient247B |
| 100 | Patient246D  | Patient247C |
| 101 | Patient079A2 | Patient263B |
| 101 | Patient152A  | Patient198  |
| 101 | Patient246D  | Patient247E |
| 102 | Patient127B  | Patient236A |
| 102 | Patient152B  | Patient198  |
| 102 | Patient184   | Patient236A |
| 103 | Patient127A  | Patient149A |
| 103 | Patient236A  | Patient265  |
| 104 | Patient079B  | Patient263A |
| 104 | Patient079B  | Patient263B |
| 105 | Patient184   | Patient265  |
| 105 | Patient246E  | Patient247D |
| 106 | Patient079C  | Patient157  |
| 106 | Patient127A  | Patient263B |
| 106 | Patient127A  | Patient265  |
| 106 | Patient127B  | Patient149A |
| 106 | Patient181A  | Patient230C |
| 107 | Patient079A1 | Patient157  |
| 107 | Patient149B  | Patient220A |
| 107 | Patient184   | Patient263B |
| 107 | Patient246B  | Patient247D |
| 108 | Patient079A2 | Patient157  |
| 108 | Patient127B  | Patient265  |
| 108 | Patient220A  | Patient236B |
| 108 | Patient236B  | Patient263A |
| 109 | Patient079C  | Patient093B |
| 109 | Patient093B  | Patient097A |
| 109 | Patient103A  | Patient103D |
| 109 | Patient103C  | Patient103D |
| 109 | Patient127B  | Patient263B |
| 109 | Patient181B  | Patient230G |
| 109 | Patient236B  | Patient263B |
| 110 | Patient127A  | Patient263A |
| 110 | Patient127B  | Patient263A |
| 110 | Patient149B  | Patient236B |
| 111 | Patient157   | Patient184  |
| 112 | Patient079A1 | Patient093B |
| 112 | Patient079A2 | Patient093B |
| 112 | Patient093C  | Patient097A |
| 112 | Patient149A  | Patient236B |
| 112 | Patient236A  | Patient263A |
| 113 | Patient079B  | Patient093B |
| 113 | Patient079B  | Patient157  |
| 113 | Patient079C  | Patient093C |
| 113 | Patient127A  | Patient157  |
| 113 | Patient220A  | Patient236A |
| 113 | Patient236A  | Patient263B |

|     |              |              |
|-----|--------------|--------------|
| 114 | Patient028   | Patient079A1 |
| 114 | Patient028   | Patient079C  |
| 114 | Patient079C  | Patient094A  |
| 114 | Patient127B  | Patient157   |
| 115 | Patient028   | Patient079A2 |
| 115 | Patient066D  | Patient230G  |
| 115 | Patient079A1 | Patient093C  |
| 115 | Patient079A1 | Patient094A  |
| 115 | Patient079A2 | Patient093C  |
| 115 | Patient079A2 | Patient094A  |
| 115 | Patient093B  | Patient097C  |
| 115 | Patient093B  | Patient097E  |
| 115 | Patient103A  | Patient103E  |
| 115 | Patient103C  | Patient103E  |
| 115 | Patient224B  | Patient230G  |
| 116 | Patient028   | Patient079B  |
| 116 | Patient079B  | Patient093C  |
| 116 | Patient093B  | Patient097D  |
| 116 | Patient149A  | Patient236A  |
| 116 | Patient149B  | Patient236A  |
| 116 | Patient181B  | Patient230C  |
| 116 | Patient189B  | Patient263A  |
| 116 | Patient246D  | Patient247D  |
| 116 | Patient263A  | Patient265   |
| 117 | Patient079A1 | Patient093E  |
| 117 | Patient079A1 | Patient213B  |
| 117 | Patient094A  | Patient097D  |
| 117 | Patient149A  | Patient220A  |
| 117 | Patient220A  | Patient265   |
| 117 | Patient224A  | Patient230G  |
| 117 | Patient263B  | Patient265   |
| 118 | Patient066E  | Patient230G  |
| 118 | Patient079A2 | Patient093E  |
| 118 | Patient079A2 | Patient213B  |
| 118 | Patient079C  | Patient093E  |
| 118 | Patient079C  | Patient213B  |
| 118 | Patient093B  | Patient213B  |
| 118 | Patient094D  | Patient097A  |
| 118 | Patient149B  | Patient265   |
| 118 | Patient157   | Patient220A  |
| 118 | Patient220A  | Patient263B  |
| 119 | Patient079A1 | Patient093A  |
| 119 | Patient079A2 | Patient093A  |
| 119 | Patient079B  | Patient094A  |
| 119 | Patient093B  | Patient184   |
| 119 | Patient093C  | Patient097D  |
| 119 | Patient093C  | Patient097E  |
| 119 | Patient103B  | Patient103D  |
| 119 | Patient149A  | Patient265   |
| 119 | Patient189A  | Patient263A  |

|     |              |              |
|-----|--------------|--------------|
| 120 | Patient066D  | Patient230C  |
| 120 | Patient066D  | Patient261E  |
| 120 | Patient066F  | Patient230G  |
| 120 | Patient079B  | Patient093E  |
| 120 | Patient079C  | Patient093A  |
| 120 | Patient079C  | Patient093D  |
| 120 | Patient093C  | Patient097C  |
| 120 | Patient126E  | Patient222A  |
| 120 | Patient189E  | Patient263A  |
| 120 | Patient220A  | Patient263A  |
| 121 | Patient079A1 | Patient093D  |
| 121 | Patient079A1 | Patient094D  |
| 121 | Patient079A2 | Patient094D  |
| 121 | Patient079C  | Patient094B  |
| 121 | Patient079C  | Patient094D  |
| 121 | Patient093B  | Patient097B  |
| 121 | Patient093B  | Patient252D  |
| 121 | Patient093C  | Patient213B  |
| 121 | Patient126E  | Patient222F  |
| 121 | Patient149B  | Patient263A  |
| 121 | Patient213B  | Patient252D  |
| 121 | Patient224B  | Patient230C  |
| 121 | Patient224B  | Patient261E  |
| 122 | Patient028   | Patient127A  |
| 122 | Patient028   | Patient184   |
| 122 | Patient066D  | Patient261C  |
| 122 | Patient079A1 | Patient252D  |
| 122 | Patient079A2 | Patient093D  |
| 122 | Patient079B  | Patient093A  |
| 122 | Patient079B  | Patient094D  |
| 122 | Patient079C  | Patient094E  |
| 122 | Patient079C  | Patient252D  |
| 122 | Patient093B  | Patient108B1 |
| 122 | Patient093B  | Patient108B2 |
| 122 | Patient093B  | Patient127A  |
| 122 | Patient093E  | Patient097D  |
| 122 | Patient094E  | Patient097A  |
| 122 | Patient126E  | Patient222B  |
| 122 | Patient126E  | Patient222D  |
| 122 | Patient149B  | Patient263B  |
| 122 | Patient224A  | Patient230C  |
| 122 | Patient224A  | Patient261E  |
| 123 | Patient066E  | Patient261E  |
| 123 | Patient079A1 | Patient094B  |
| 123 | Patient079A1 | Patient094E  |
| 123 | Patient079A2 | Patient094B  |
| 123 | Patient079A2 | Patient094E  |
| 123 | Patient079A2 | Patient252D  |
| 123 | Patient079B  | Patient094E  |
| 123 | Patient093A  | Patient097D  |

|     |              |              |
|-----|--------------|--------------|
| 123 | Patient093C  | Patient097B  |
| 123 | Patient093C  | Patient184   |
| 123 | Patient094A  | Patient097B  |
| 123 | Patient094A  | Patient213B  |
| 123 | Patient103B  | Patient103E  |
| 123 | Patient149A  | Patient263B  |
| 123 | Patient224B  | Patient261C  |
| 124 | Patient066E  | Patient230C  |
| 124 | Patient079A1 | Patient159   |
| 124 | Patient079B  | Patient213B  |
| 124 | Patient093A  | Patient213B  |
| 124 | Patient093B  | Patient127B  |
| 124 | Patient093C  | Patient252D  |
| 124 | Patient093E  | Patient097B  |
| 124 | Patient093E  | Patient213B  |
| 124 | Patient094A  | Patient097A  |
| 124 | Patient094A  | Patient108A  |
| 124 | Patient094A  | Patient108B1 |
| 124 | Patient094A  | Patient127A  |
| 124 | Patient094A  | Patient184   |
| 124 | Patient094D  | Patient097C  |
| 124 | Patient097A  | Patient213B  |
| 124 | Patient126E  | Patient222E  |
| 124 | Patient159   | Patient213B  |
| 124 | Patient159   | Patient252D  |
| 124 | Patient213B  | Patient222C  |
| 125 | Patient066E  | Patient261C  |
| 125 | Patient079C  | Patient159   |
| 125 | Patient093A  | Patient184   |
| 125 | Patient093B  | Patient108D  |
| 125 | Patient093D  | Patient097D  |
| 125 | Patient094D  | Patient097D  |
| 125 | Patient149A  | Patient263A  |
| 125 | Patient224A  | Patient261C  |
| 126 | Patient028   | Patient127B  |
| 126 | Patient028   | Patient189A  |
| 126 | Patient028   | Patient236B  |
| 126 | Patient079A1 | Patient094C  |
| 126 | Patient079A2 | Patient094C  |
| 126 | Patient079A2 | Patient159   |
| 126 | Patient079B  | Patient094B  |
| 126 | Patient079C  | Patient094C  |
| 126 | Patient093A  | Patient097B  |
| 126 | Patient093A  | Patient108A  |
| 126 | Patient093A  | Patient108B1 |
| 126 | Patient093A  | Patient127A  |
| 126 | Patient093B  | Patient108A  |
| 126 | Patient093C  | Patient108B1 |
| 126 | Patient093C  | Patient127A  |
| 126 | Patient093E  | Patient108B1 |



|     |             |              |
|-----|-------------|--------------|
| 126 | Patient093E | Patient184   |
| 126 | Patient094D | Patient097E  |
| 126 | Patient213B | Patient222A  |
| 127 | Patient028  | Patient189B  |
| 127 | Patient028  | Patient236A  |
| 127 | Patient066F | Patient230C  |
| 127 | Patient066F | Patient261E  |
| 127 | Patient079B | Patient093D  |
| 127 | Patient079B | Patient252D  |
| 127 | Patient093C | Patient108B2 |
| 127 | Patient093C | Patient127B  |
| 127 | Patient093D | Patient213B  |
| 127 | Patient094A | Patient108B2 |
| 127 | Patient094D | Patient213B  |
| 127 | Patient094E | Patient097D  |
| 128 | Patient066F | Patient261C  |
| 128 | Patient093A | Patient097A  |
| 128 | Patient093A | Patient108B2 |
| 128 | Patient093B | Patient159   |
| 128 | Patient093B | Patient236B  |
| 128 | Patient093C | Patient108A  |
| 128 | Patient093C | Patient108D  |
| 128 | Patient093E | Patient097A  |
| 128 | Patient093E | Patient108A  |
| 128 | Patient093E | Patient108B2 |
| 128 | Patient093E | Patient127A  |
| 128 | Patient094A | Patient097C  |
| 128 | Patient094B | Patient097D  |
| 128 | Patient094E | Patient097C  |
| 128 | Patient094E | Patient097E  |
| 128 | Patient126E | Patient213B  |
| 128 | Patient184  | Patient213B  |
| 128 | Patient213B | Patient222B  |
| 128 | Patient213B | Patient222E  |
| 128 | Patient213B | Patient222F  |
| 129 | Patient028  | Patient189E  |
| 129 | Patient093D | Patient097A  |
| 129 | Patient094A | Patient109A  |
| 129 | Patient094A | Patient252D  |
| 129 | Patient094B | Patient184   |
| 129 | Patient094B | Patient213B  |
| 129 | Patient094D | Patient097B  |
| 129 | Patient094D | Patient184   |
| 129 | Patient094D | Patient252D  |
| 129 | Patient097A | Patient184   |
| 129 | Patient097C | Patient213B  |
| 129 | Patient108A | Patient127A  |
| 129 | Patient108A | Patient213B  |
| 129 | Patient108D | Patient213B  |
| 129 | Patient127A | Patient213B  |

|     |             |              |
|-----|-------------|--------------|
| 130 | Patient079B | Patient159   |
| 130 | Patient093B | Patient109A  |
| 130 | Patient093C | Patient159   |
| 130 | Patient093D | Patient127A  |
| 130 | Patient093D | Patient184   |
| 130 | Patient094A | Patient108D  |
| 130 | Patient094B | Patient097A  |
| 130 | Patient094B | Patient108B2 |
| 130 | Patient094C | Patient097D  |
| 130 | Patient094C | Patient213B  |
| 130 | Patient094E | Patient213B  |
| 130 | Patient097A | Patient127A  |
| 130 | Patient097D | Patient213B  |
| 130 | Patient108A | Patient184   |
| 130 | Patient108D | Patient184   |
| 131 | Patient028  | Patient265   |
| 131 | Patient079B | Patient094C  |
| 131 | Patient093A | Patient108D  |
| 131 | Patient093B | Patient108H  |
| 131 | Patient093B | Patient109B  |
| 131 | Patient093D | Patient097B  |
| 131 | Patient093D | Patient108B1 |
| 131 | Patient093E | Patient108D  |
| 131 | Patient094A | Patient097E  |
| 131 | Patient094A | Patient127B  |
| 131 | Patient094B | Patient097B  |
| 131 | Patient094D | Patient108B1 |
| 131 | Patient094E | Patient097B  |
| 131 | Patient097A | Patient252D  |
| 131 | Patient108D | Patient127A  |
| 131 | Patient127B | Patient213B  |
| 131 | Patient196A | Patient213B  |
| 132 | Patient066D | Patient261G  |
| 132 | Patient093A | Patient109A  |
| 132 | Patient093A | Patient252D  |
| 132 | Patient093B | Patient108G  |
| 132 | Patient093B | Patient109C  |
| 132 | Patient093B | Patient109E  |
| 132 | Patient093B | Patient236A  |
| 132 | Patient093C | Patient236B  |
| 132 | Patient093E | Patient097C  |
| 132 | Patient093E | Patient252D  |
| 132 | Patient094A | Patient108H  |
| 132 | Patient094B | Patient108A  |
| 132 | Patient094B | Patient108B1 |
| 132 | Patient094B | Patient127A  |
| 132 | Patient094D | Patient108B2 |
| 132 | Patient094D | Patient127A  |
| 132 | Patient094E | Patient184   |
| 132 | Patient097E | Patient213B  |

|     |              |              |
|-----|--------------|--------------|
| 132 | Patient184   | Patient263A  |
| 132 | Patient224B  | Patient261G  |
| 133 | Patient079A2 | Patient222C  |
| 133 | Patient079C  | Patient222C  |
| 133 | Patient093B  | Patient108F  |
| 133 | Patient093B  | Patient265   |
| 133 | Patient093D  | Patient108B2 |
| 133 | Patient093E  | Patient109A  |
| 133 | Patient094A  | Patient108G  |
| 133 | Patient094C  | Patient108A  |
| 133 | Patient094C  | Patient108B1 |
| 133 | Patient094C  | Patient108B2 |
| 133 | Patient094C  | Patient127A  |
| 133 | Patient094E  | Patient108B1 |
| 133 | Patient097B  | Patient213B  |
| 133 | Patient108A  | Patient127B  |
| 133 | Patient109A  | Patient127A  |
| 133 | Patient109A  | Patient213B  |
| 133 | Patient127A  | Patient252D  |
| 133 | Patient157   | Patient236B  |
| 133 | Patient184   | Patient252D  |
| 133 | Patient187   | Patient213B  |
| 133 | Patient196F  | Patient213B  |
| 133 | Patient230G  | Patient261B  |
| 133 | Patient230G  | Patient261E  |
| 134 | Patient028   | Patient220A  |
| 134 | Patient079A1 | Patient126E  |
| 134 | Patient079A1 | Patient187   |
| 134 | Patient079A1 | Patient222C  |
| 134 | Patient093B  | Patient149B  |
| 134 | Patient093C  | Patient109A  |
| 134 | Patient093D  | Patient108A  |
| 134 | Patient093E  | Patient097E  |
| 134 | Patient093E  | Patient127B  |
| 134 | Patient094A  | Patient109C  |
| 134 | Patient094B  | Patient097E  |
| 134 | Patient094B  | Patient108D  |
| 134 | Patient094C  | Patient097B  |
| 134 | Patient094C  | Patient184   |
| 134 | Patient094D  | Patient108A  |
| 134 | Patient097A  | Patient127B  |
| 134 | Patient100A  | Patient213B  |
| 134 | Patient109A  | Patient184   |
| 134 | Patient159   | Patient187   |
| 134 | Patient187   | Patient252D  |
| 134 | Patient196B  | Patient213B  |
| 134 | Patient213B  | Patient252B  |
| 135 | Patient066E  | Patient261G  |
| 135 | Patient079A2 | Patient126E  |
| 135 | Patient093A  | Patient097C  |

|     |              |              |
|-----|--------------|--------------|
| 135 | Patient093A  | Patient108G  |
| 135 | Patient093A  | Patient127B  |
| 135 | Patient093B  | Patient220A  |
| 135 | Patient093C  | Patient108F  |
| 135 | Patient093C  | Patient108G  |
| 135 | Patient093C  | Patient108H  |
| 135 | Patient093C  | Patient109B  |
| 135 | Patient093C  | Patient109C  |
| 135 | Patient093C  | Patient109E  |
| 135 | Patient093C  | Patient236A  |
| 135 | Patient093D  | Patient097C  |
| 135 | Patient093D  | Patient097E  |
| 135 | Patient093D  | Patient252D  |
| 135 | Patient093E  | Patient108G  |
| 135 | Patient094A  | Patient109B  |
| 135 | Patient094A  | Patient109E  |
| 135 | Patient094A  | Patient159   |
| 135 | Patient094A  | Patient220A  |
| 135 | Patient094C  | Patient097A  |
| 135 | Patient094D  | Patient108D  |
| 135 | Patient094D  | Patient127B  |
| 135 | Patient094E  | Patient108A  |
| 135 | Patient094E  | Patient108B2 |
| 135 | Patient094E  | Patient127A  |
| 135 | Patient094E  | Patient252D  |
| 135 | Patient097D  | Patient127A  |
| 135 | Patient097D  | Patient184   |
| 135 | Patient099A  | Patient213B  |
| 135 | Patient108A  | Patient252D  |
| 135 | Patient108D  | Patient127B  |
| 135 | Patient109B  | Patient213B  |
| 135 | Patient149B  | Patient157   |
| 135 | Patient181A  | Patient261E  |
| 135 | Patient196C  | Patient213B  |
| 135 | Patient222C  | Patient252D  |
| 135 | Patient224A  | Patient261G  |
| 135 | Patient230G  | Patient261A  |
| 136 | Patient079A1 | Patient222A  |
| 136 | Patient079A1 | Patient222B  |
| 136 | Patient079A2 | Patient222A  |
| 136 | Patient079C  | Patient126E  |
| 136 | Patient079C  | Patient187   |
| 136 | Patient093A  | Patient097E  |
| 136 | Patient093A  | Patient108H  |
| 136 | Patient093A  | Patient159   |
| 136 | Patient093B  | Patient252B  |
| 136 | Patient093C  | Patient265   |
| 136 | Patient093D  | Patient108D  |
| 136 | Patient093D  | Patient159   |
| 136 | Patient093E  | Patient109B  |

|     |              |             |
|-----|--------------|-------------|
| 136 | Patient093E  | Patient159  |
| 136 | Patient094B  | Patient252D |
| 136 | Patient097A  | Patient159  |
| 136 | Patient097C  | Patient127A |
| 136 | Patient097C  | Patient184  |
| 136 | Patient097C  | Patient252D |
| 136 | Patient108G  | Patient213B |
| 136 | Patient109B  | Patient184  |
| 136 | Patient126E  | Patient252D |
| 136 | Patient213B  | Patient252A |
| 136 | Patient230G  | Patient261C |
| 137 | Patient079A1 | Patient196A |
| 137 | Patient079A2 | Patient187  |
| 137 | Patient079A2 | Patient222B |
| 137 | Patient079B  | Patient126E |
| 137 | Patient079B  | Patient187  |
| 137 | Patient079B  | Patient222C |
| 137 | Patient093A  | Patient108F |
| 137 | Patient093A  | Patient109C |
| 137 | Patient093A  | Patient109E |
| 137 | Patient093B  | Patient126E |
| 137 | Patient093B  | Patient187  |
| 137 | Patient093B  | Patient196B |
| 137 | Patient093B  | Patient201B |
| 137 | Patient093C  | Patient149B |
| 137 | Patient093D  | Patient127B |
| 137 | Patient094A  | Patient108F |
| 137 | Patient094B  | Patient097C |
| 137 | Patient094B  | Patient109A |
| 137 | Patient097D  | Patient252D |
| 137 | Patient099B  | Patient213B |
| 137 | Patient108D  | Patient252D |
| 137 | Patient108G  | Patient184  |
| 137 | Patient109A  | Patient127B |
| 137 | Patient109B  | Patient127A |
| 137 | Patient127A  | Patient159  |
| 137 | Patient157   | Patient236A |
| 137 | Patient159   | Patient184  |
| 137 | Patient181A  | Patient261C |
| 137 | Patient196E  | Patient213B |
| 138 | Patient028   | Patient263A |
| 138 | Patient028   | Patient263B |
| 138 | Patient066F  | Patient261G |
| 138 | Patient079A1 | Patient196B |
| 138 | Patient079A1 | Patient222F |
| 138 | Patient079A2 | Patient196A |
| 138 | Patient079A2 | Patient222F |
| 138 | Patient079C  | Patient196B |
| 138 | Patient079C  | Patient222B |
| 138 | Patient093A  | Patient109B |

|     |              |             |
|-----|--------------|-------------|
| 138 | Patient093A  | Patient220A |
| 138 | Patient093B  | Patient109D |
| 138 | Patient093B  | Patient131  |
| 138 | Patient093B  | Patient196A |
| 138 | Patient093D  | Patient109A |
| 138 | Patient093E  | Patient108H |
| 138 | Patient093E  | Patient220A |
| 138 | Patient094B  | Patient127B |
| 138 | Patient094C  | Patient108D |
| 138 | Patient094E  | Patient108D |
| 138 | Patient097A  | Patient236B |
| 138 | Patient097E  | Patient184  |
| 138 | Patient108A  | Patient236B |
| 138 | Patient108G  | Patient127A |
| 138 | Patient126E  | Patient222C |
| 138 | Patient196B  | Patient252D |
| 138 | Patient213B  | Patient236B |
| 138 | Patient222F  | Patient252D |
| 138 | Patient230C  | Patient261B |
| 138 | Patient230C  | Patient261C |
| 138 | Patient230C  | Patient261E |
| 138 | Patient230E  | Patient261C |
| 138 | Patient230E  | Patient261E |
| 139 | Patient028   | Patient149A |
| 139 | Patient079A2 | Patient196B |
| 139 | Patient079C  | Patient196A |
| 139 | Patient079C  | Patient196F |
| 139 | Patient079C  | Patient222A |
| 139 | Patient079C  | Patient222F |
| 139 | Patient093B  | Patient126D |
| 139 | Patient093B  | Patient149A |
| 139 | Patient093B  | Patient252A |
| 139 | Patient093C  | Patient220A |
| 139 | Patient093D  | Patient109E |
| 139 | Patient093E  | Patient108F |
| 139 | Patient093E  | Patient109E |
| 139 | Patient094A  | Patient109D |
| 139 | Patient094B  | Patient108G |
| 139 | Patient094B  | Patient109B |
| 139 | Patient094B  | Patient159  |
| 139 | Patient094C  | Patient109A |
| 139 | Patient094D  | Patient109A |
| 139 | Patient094D  | Patient236B |
| 139 | Patient097C  | Patient127B |
| 139 | Patient097E  | Patient127A |
| 139 | Patient099E  | Patient213B |
| 139 | Patient108B1 | Patient213B |
| 139 | Patient108B2 | Patient213B |
| 139 | Patient108F  | Patient213B |
| 139 | Patient108H  | Patient127A |

|     |              |             |
|-----|--------------|-------------|
| 139 | Patient108H  | Patient213B |
| 139 | Patient109A  | Patient252D |
| 139 | Patient109B  | Patient127B |
| 139 | Patient109E  | Patient184  |
| 139 | Patient127B  | Patient159  |
| 139 | Patient159   | Patient218A |
| 139 | Patient159   | Patient222C |
| 139 | Patient159   | Patient252A |
| 139 | Patient159   | Patient252B |
| 139 | Patient196F  | Patient252D |
| 139 | Patient213B  | Patient218A |
| 139 | Patient230A  | Patient261E |
| 139 | Patient230F  | Patient261C |
| 139 | Patient230F  | Patient261E |
| 140 | Patient028   | Patient149B |
| 140 | Patient079A1 | Patient196F |
| 140 | Patient079B  | Patient222A |
| 140 | Patient079B  | Patient222B |
| 140 | Patient079C  | Patient222E |
| 140 | Patient093C  | Patient131  |
| 140 | Patient093C  | Patient187  |
| 140 | Patient093C  | Patient196B |
| 140 | Patient093C  | Patient252B |
| 140 | Patient093D  | Patient108F |
| 140 | Patient093D  | Patient108H |
| 140 | Patient093D  | Patient109B |
| 140 | Patient093D  | Patient109C |
| 140 | Patient093E  | Patient109C |
| 140 | Patient094B  | Patient108H |
| 140 | Patient094C  | Patient252D |
| 140 | Patient094D  | Patient159  |
| 140 | Patient094E  | Patient109A |
| 140 | Patient094E  | Patient236B |
| 140 | Patient097B  | Patient184  |
| 140 | Patient097B  | Patient252D |
| 140 | Patient097C  | Patient159  |
| 140 | Patient097D  | Patient127B |
| 140 | Patient097E  | Patient127B |
| 140 | Patient097E  | Patient252D |
| 140 | Patient099C  | Patient213B |
| 140 | Patient108A  | Patient149B |
| 140 | Patient108B1 | Patient184  |
| 140 | Patient108B2 | Patient184  |
| 140 | Patient108D  | Patient159  |
| 140 | Patient108H  | Patient184  |
| 140 | Patient109E  | Patient127A |
| 140 | Patient126E  | Patient159  |
| 140 | Patient127B  | Patient252D |
| 140 | Patient230D  | Patient261C |
| 140 | Patient230D  | Patient261E |

|     |              |             |
|-----|--------------|-------------|
| 141 | Patient079A1 | Patient222E |
| 141 | Patient079A2 | Patient196F |
| 141 | Patient079A2 | Patient222E |
| 141 | Patient079B  | Patient196A |
| 141 | Patient079B  | Patient222F |
| 141 | Patient093B  | Patient196C |
| 141 | Patient093B  | Patient222F |
| 141 | Patient093B  | Patient252F |
| 141 | Patient093B  | Patient263B |
| 141 | Patient093C  | Patient109D |
| 141 | Patient093C  | Patient126E |
| 141 | Patient093C  | Patient149A |
| 141 | Patient093C  | Patient196A |
| 141 | Patient093D  | Patient108G |
| 141 | Patient094A  | Patient236B |
| 141 | Patient094B  | Patient109C |
| 141 | Patient094B  | Patient109E |
| 141 | Patient094C  | Patient097E |
| 141 | Patient094C  | Patient127B |
| 141 | Patient094D  | Patient108G |
| 141 | Patient094D  | Patient109E |
| 141 | Patient094E  | Patient127B |
| 141 | Patient097B  | Patient127A |
| 141 | Patient097D  | Patient159  |
| 141 | Patient108A  | Patient159  |
| 141 | Patient108H  | Patient127B |
| 141 | Patient109C  | Patient127A |
| 141 | Patient109E  | Patient213B |
| 141 | Patient126D  | Patient222A |
| 141 | Patient126D  | Patient222D |
| 141 | Patient126D  | Patient222F |
| 141 | Patient159   | Patient218B |
| 141 | Patient196A  | Patient252D |
| 141 | Patient213B  | Patient236A |
| 141 | Patient213B  | Patient252F |
| 141 | Patient222B  | Patient252D |
| 141 | Patient222E  | Patient252D |
| 141 | Patient230A  | Patient261C |
| 141 | Patient230C  | Patient261A |
| 141 | Patient230G  | Patient261D |
| 142 | Patient005   | Patient091B |
| 142 | Patient045D  | Patient213B |
| 142 | Patient079A1 | Patient218A |
| 142 | Patient079B  | Patient196B |
| 142 | Patient093A  | Patient109D |
| 142 | Patient093B  | Patient201A |
| 142 | Patient093B  | Patient222A |
| 142 | Patient093B  | Patient222E |
| 142 | Patient093C  | Patient126D |
| 142 | Patient093C  | Patient201B |



|     |              |             |
|-----|--------------|-------------|
| 142 | Patient093C  | Patient252A |
| 142 | Patient093E  | Patient109D |
| 142 | Patient094A  | Patient187  |
| 142 | Patient094B  | Patient108F |
| 142 | Patient094C  | Patient097C |
| 142 | Patient094C  | Patient108G |
| 142 | Patient094D  | Patient108F |
| 142 | Patient094D  | Patient108H |
| 142 | Patient094D  | Patient109B |
| 142 | Patient094E  | Patient108G |
| 142 | Patient097A  | Patient236A |
| 142 | Patient097C  | Patient236B |
| 142 | Patient097D  | Patient236B |
| 142 | Patient099D  | Patient213B |
| 142 | Patient108A  | Patient220A |
| 142 | Patient108A  | Patient236A |
| 142 | Patient108B1 | Patient127A |
| 142 | Patient108D  | Patient149B |
| 142 | Patient108D  | Patient236B |
| 142 | Patient108G  | Patient127B |
| 142 | Patient109A  | Patient236B |
| 142 | Patient109C  | Patient184  |
| 142 | Patient109D  | Patient127A |
| 142 | Patient109E  | Patient252D |
| 142 | Patient157   | Patient265  |
| 142 | Patient159   | Patient196A |
| 142 | Patient159   | Patient222A |
| 142 | Patient159   | Patient222F |
| 142 | Patient196C  | Patient252D |
| 142 | Patient213B  | Patient218B |
| 142 | Patient213B  | Patient220A |
| 142 | Patient236B  | Patient252D |
| 143 | Patient079A2 | Patient218A |
| 143 | Patient079C  | Patient196C |
| 143 | Patient079C  | Patient218A |
| 143 | Patient093B  | Patient196E |
| 143 | Patient093B  | Patient201E |
| 143 | Patient093B  | Patient222B |
| 143 | Patient093D  | Patient220A |
| 143 | Patient093E  | Patient187  |
| 143 | Patient094A  | Patient252A |
| 143 | Patient094A  | Patient252B |
| 143 | Patient094C  | Patient108H |
| 143 | Patient094D  | Patient109C |
| 143 | Patient094D  | Patient149B |
| 143 | Patient094D  | Patient236A |
| 143 | Patient094E  | Patient108F |
| 143 | Patient094E  | Patient108H |
| 143 | Patient097A  | Patient126E |
| 143 | Patient097A  | Patient149B |

|     |              |             |
|-----|--------------|-------------|
| 143 | Patient097A  | Patient220A |
| 143 | Patient097E  | Patient159  |
| 143 | Patient097E  | Patient236B |
| 143 | Patient108A  | Patient263A |
| 143 | Patient108A  | Patient263B |
| 143 | Patient108B1 | Patient126E |
| 143 | Patient108B2 | Patient127A |
| 143 | Patient108F  | Patient184  |
| 143 | Patient108G  | Patient252D |
| 143 | Patient108H  | Patient252D |
| 143 | Patient109B  | Patient252D |
| 143 | Patient109C  | Patient127B |
| 143 | Patient109D  | Patient184  |
| 143 | Patient126D  | Patient222B |
| 143 | Patient126D  | Patient222E |
| 143 | Patient159   | Patient196B |
| 143 | Patient159   | Patient222B |
| 143 | Patient159   | Patient252F |
| 143 | Patient222A  | Patient252D |
| 143 | Patient222C  | Patient252B |
| 144 | Patient079A1 | Patient196C |
| 144 | Patient079A1 | Patient196E |
| 144 | Patient079A1 | Patient218B |
| 144 | Patient079C  | Patient196E |
| 144 | Patient093A  | Patient187  |
| 144 | Patient093C  | Patient196C |
| 144 | Patient093C  | Patient222A |
| 144 | Patient093C  | Patient222F |
| 144 | Patient093C  | Patient263B |
| 144 | Patient093E  | Patient131  |
| 144 | Patient094B  | Patient220A |
| 144 | Patient094C  | Patient108F |
| 144 | Patient094C  | Patient109C |
| 144 | Patient094C  | Patient109E |
| 144 | Patient094C  | Patient159  |
| 144 | Patient094D  | Patient220A |
| 144 | Patient094D  | Patient252B |
| 144 | Patient094D  | Patient265  |
| 144 | Patient094E  | Patient109B |
| 144 | Patient094E  | Patient109E |
| 144 | Patient094E  | Patient159  |
| 144 | Patient097A  | Patient187  |
| 144 | Patient097A  | Patient222C |
| 144 | Patient097B  | Patient127B |
| 144 | Patient097B  | Patient159  |
| 144 | Patient108D  | Patient236A |
| 144 | Patient108F  | Patient127A |
| 144 | Patient108F  | Patient252D |
| 144 | Patient108H  | Patient236B |
| 144 | Patient109A  | Patient159  |

|     |              |             |
|-----|--------------|-------------|
| 144 | Patient109B  | Patient159  |
| 144 | Patient109B  | Patient236B |
| 144 | Patient109C  | Patient213B |
| 144 | Patient109E  | Patient127B |
| 144 | Patient126E  | Patient184  |
| 144 | Patient149B  | Patient213B |
| 144 | Patient159   | Patient196F |
| 144 | Patient159   | Patient222E |
| 144 | Patient159   | Patient236B |
| 144 | Patient181B  | Patient261E |
| 144 | Patient196B  | Patient222C |
| 144 | Patient196E  | Patient252D |
| 144 | Patient213B  | Patient265  |
| 144 | Patient218B  | Patient252D |
| 145 | Patient045D  | Patient252D |
| 145 | Patient079A2 | Patient196C |
| 145 | Patient079A2 | Patient196E |
| 145 | Patient079A2 | Patient218B |
| 145 | Patient079B  | Patient222E |
| 145 | Patient093A  | Patient131  |
| 145 | Patient093C  | Patient201A |
| 145 | Patient093C  | Patient222E |
| 145 | Patient093D  | Patient131  |
| 145 | Patient093E  | Patient252B |
| 145 | Patient094A  | Patient131  |
| 145 | Patient094B  | Patient109D |
| 145 | Patient094C  | Patient109B |
| 145 | Patient094C  | Patient220A |
| 145 | Patient094E  | Patient109C |
| 145 | Patient094E  | Patient149B |
| 145 | Patient097A  | Patient201B |
| 145 | Patient108B2 | Patient126E |
| 145 | Patient109A  | Patient149B |
| 145 | Patient109A  | Patient220A |
| 145 | Patient109C  | Patient252D |
| 145 | Patient109D  | Patient213B |
| 145 | Patient149A  | Patient157  |
| 145 | Patient157   | Patient263B |
| 145 | Patient196A  | Patient222C |
| 145 | Patient213B  | Patient222D |
| 145 | Patient213B  | Patient263A |
| 145 | Patient220A  | Patient252D |
| 145 | Patient230G  | Patient261G |
| 145 | Patient236A  | Patient252D |
| 146 | Patient045D  | Patient159  |
| 146 | Patient079B  | Patient196F |
| 146 | Patient079C  | Patient218B |
| 146 | Patient093B  | Patient218A |
| 146 | Patient093C  | Patient196E |
| 146 | Patient093C  | Patient252F |

|     |             |             |
|-----|-------------|-------------|
| 146 | Patient094D | Patient126E |
| 146 | Patient094D | Patient187  |
| 146 | Patient094D | Patient196B |
| 146 | Patient094E | Patient220A |
| 146 | Patient094E | Patient265  |
| 146 | Patient097A | Patient196A |
| 146 | Patient097A | Patient196B |
| 146 | Patient097A | Patient222F |
| 146 | Patient097C | Patient222C |
| 146 | Patient108A | Patient222C |
| 146 | Patient108A | Patient265  |
| 146 | Patient108D | Patient263A |
| 146 | Patient109A | Patient236A |
| 146 | Patient109B | Patient149B |
| 146 | Patient109D | Patient127B |
| 146 | Patient126E | Patient127A |
| 146 | Patient149B | Patient252D |
| 146 | Patient157  | Patient263A |
| 146 | Patient159  | Patient236A |
| 146 | Patient181A | Patient261G |
| 146 | Patient181B | Patient261C |
| 146 | Patient196A | Patient222A |
| 146 | Patient213B | Patient263B |
| 146 | Patient218A | Patient252D |
| 146 | Patient230B | Patient261E |
| 147 | Patient079B | Patient218A |
| 147 | Patient093A | Patient236B |
| 147 | Patient093A | Patient252A |
| 147 | Patient093A | Patient252B |
| 147 | Patient093C | Patient201E |
| 147 | Patient093C | Patient222B |
| 147 | Patient093D | Patient187  |
| 147 | Patient093E | Patient236B |
| 147 | Patient093E | Patient252A |
| 147 | Patient094A | Patient236A |
| 147 | Patient094C | Patient109D |
| 147 | Patient094D | Patient109D |
| 147 | Patient094D | Patient149A |
| 147 | Patient094E | Patient236A |
| 147 | Patient097A | Patient196F |
| 147 | Patient097A | Patient222A |
| 147 | Patient097A | Patient265  |
| 147 | Patient097C | Patient126E |
| 147 | Patient097C | Patient220A |
| 147 | Patient097D | Patient149B |
| 147 | Patient097D | Patient220A |
| 147 | Patient097D | Patient222C |
| 147 | Patient097D | Patient236A |
| 147 | Patient108A | Patient126E |
| 147 | Patient108A | Patient187  |

|     |              |             |
|-----|--------------|-------------|
| 147 | Patient108B1 | Patient127B |
| 147 | Patient108B2 | Patient127B |
| 147 | Patient108D  | Patient220A |
| 147 | Patient108D  | Patient263B |
| 147 | Patient108D  | Patient265  |
| 147 | Patient108F  | Patient127B |
| 147 | Patient108G  | Patient149B |
| 147 | Patient108G  | Patient159  |
| 147 | Patient108G  | Patient236B |
| 147 | Patient109B  | Patient236A |
| 147 | Patient109C  | Patient236B |
| 147 | Patient126D  | Patient213B |
| 147 | Patient126E  | Patient187  |
| 147 | Patient127A  | Patient187  |
| 147 | Patient149A  | Patient213B |
| 147 | Patient184   | Patient187  |
| 147 | Patient184   | Patient252B |
| 147 | Patient196A  | Patient222B |
| 147 | Patient196B  | Patient222A |
| 147 | Patient196F  | Patient222C |
| 147 | Patient222C  | Patient252A |
| 147 | Patient222F  | Patient252B |
| 147 | Patient230C  | Patient261D |
| 148 | Patient066B  | Patient091B |
| 148 | Patient079B  | Patient196C |
| 148 | Patient079B  | Patient196E |
| 148 | Patient079B  | Patient218B |
| 148 | Patient079C  | Patient104B |
| 148 | Patient093B  | Patient218B |
| 148 | Patient093D  | Patient109D |
| 148 | Patient093D  | Patient236B |
| 148 | Patient094A  | Patient149B |
| 148 | Patient094A  | Patient252F |
| 148 | Patient094D  | Patient126D |
| 148 | Patient094D  | Patient131  |
| 148 | Patient094D  | Patient196A |
| 148 | Patient094D  | Patient201B |
| 148 | Patient094E  | Patient196B |
| 148 | Patient094E  | Patient252B |
| 148 | Patient097A  | Patient201A |
| 148 | Patient097A  | Patient222B |
| 148 | Patient097A  | Patient222D |
| 148 | Patient097B  | Patient236B |
| 148 | Patient097C  | Patient236A |
| 148 | Patient097D  | Patient126E |
| 148 | Patient097E  | Patient236A |
| 148 | Patient108B1 | Patient252D |
| 148 | Patient108D  | Patient187  |
| 148 | Patient108H  | Patient149B |
| 148 | Patient108H  | Patient159  |

|     |              |             |
|-----|--------------|-------------|
| 148 | Patient109A  | Patient263A |
| 148 | Patient109A  | Patient263B |
| 148 | Patient109B  | Patient263A |
| 148 | Patient126E  | Patient196A |
| 148 | Patient127A  | Patient196A |
| 148 | Patient127A  | Patient222C |
| 148 | Patient127A  | Patient252A |
| 148 | Patient127A  | Patient252B |
| 148 | Patient184   | Patient196A |
| 148 | Patient184   | Patient252A |
| 148 | Patient187   | Patient252B |
| 148 | Patient196A  | Patient222F |
| 148 | Patient196B  | Patient222B |
| 148 | Patient196B  | Patient222F |
| 148 | Patient204   | Patient205  |
| 148 | Patient230B  | Patient261C |
| 148 | Patient230C  | Patient261G |
| 148 | Patient230E  | Patient261G |
| 148 | Patient252D  | Patient265  |
| 149 | Patient079A1 | Patient104B |
| 149 | Patient079A1 | Patient201B |
| 149 | Patient079C  | Patient201B |
| 149 | Patient093D  | Patient252B |
| 149 | Patient094A  | Patient196B |
| 149 | Patient094A  | Patient218A |
| 149 | Patient094A  | Patient265  |
| 149 | Patient094B  | Patient131  |
| 149 | Patient094B  | Patient187  |
| 149 | Patient094B  | Patient236B |
| 149 | Patient094D  | Patient222F |
| 149 | Patient094D  | Patient252A |
| 149 | Patient094E  | Patient109D |
| 149 | Patient094E  | Patient126E |
| 149 | Patient094E  | Patient149A |
| 149 | Patient094E  | Patient187  |
| 149 | Patient097A  | Patient196C |
| 149 | Patient097A  | Patient263A |
| 149 | Patient097A  | Patient263B |
| 149 | Patient097C  | Patient149B |
| 149 | Patient097C  | Patient196B |
| 149 | Patient097D  | Patient196B |
| 149 | Patient097E  | Patient126E |
| 149 | Patient097E  | Patient149B |
| 149 | Patient108A  | Patient196A |
| 149 | Patient108B2 | Patient252D |
| 149 | Patient108D  | Patient126E |
| 149 | Patient108D  | Patient222C |
| 149 | Patient108H  | Patient236A |
| 149 | Patient109B  | Patient263B |
| 149 | Patient109E  | Patient236B |

|     |              |             |
|-----|--------------|-------------|
| 149 | Patient126E  | Patient196B |
| 149 | Patient126E  | Patient252B |
| 149 | Patient127A  | Patient196B |
| 149 | Patient159   | Patient196C |
| 149 | Patient159   | Patient196E |
| 149 | Patient181A  | Patient224A |
| 149 | Patient184   | Patient196B |
| 149 | Patient187   | Patient222A |
| 149 | Patient187   | Patient222C |
| 149 | Patient196A  | Patient222D |
| 149 | Patient196C  | Patient222D |
| 149 | Patient196E  | Patient222C |
| 149 | Patient222B  | Patient252B |
| 149 | Patient230F  | Patient261G |
| 150 | Patient045D  | Patient222C |
| 150 | Patient066D  | Patient141D |
| 150 | Patient079A2 | Patient201B |
| 150 | Patient093A  | Patient236A |
| 150 | Patient093B  | Patient100A |
| 150 | Patient093B  | Patient157  |
| 150 | Patient093C  | Patient218A |
| 150 | Patient093D  | Patient252A |
| 150 | Patient094A  | Patient100A |
| 150 | Patient094B  | Patient252B |
| 150 | Patient094D  | Patient196C |
| 150 | Patient094D  | Patient222A |
| 150 | Patient094E  | Patient196A |
| 150 | Patient097A  | Patient222E |
| 150 | Patient097B  | Patient126E |
| 150 | Patient097B  | Patient187  |
| 150 | Patient097C  | Patient187  |
| 150 | Patient097C  | Patient196A |
| 150 | Patient097C  | Patient201B |
| 150 | Patient097C  | Patient222A |
| 150 | Patient097C  | Patient265  |
| 150 | Patient097D  | Patient187  |
| 150 | Patient097D  | Patient222A |
| 150 | Patient097E  | Patient220A |
| 150 | Patient097E  | Patient222C |
| 150 | Patient108A  | Patient196B |
| 150 | Patient108A  | Patient222A |
| 150 | Patient108A  | Patient222F |
| 150 | Patient108G  | Patient220A |
| 150 | Patient108G  | Patient263A |
| 150 | Patient108H  | Patient263A |
| 150 | Patient109A  | Patient265  |
| 150 | Patient109B  | Patient220A |
| 150 | Patient109B  | Patient265  |
| 150 | Patient109C  | Patient159  |
| 150 | Patient109C  | Patient236A |

|     |              |             |
|-----|--------------|-------------|
| 150 | Patient109D  | Patient252D |
| 150 | Patient109E  | Patient149B |
| 150 | Patient109E  | Patient159  |
| 150 | Patient127A  | Patient222B |
| 150 | Patient127A  | Patient222F |
| 150 | Patient184   | Patient222A |
| 150 | Patient187   | Patient252A |
| 150 | Patient196B  | Patient222D |
| 150 | Patient196B  | Patient252B |
| 150 | Patient196C  | Patient222C |
| 150 | Patient196C  | Patient222F |
| 150 | Patient196F  | Patient222A |
| 150 | Patient196F  | Patient222B |
| 150 | Patient196F  | Patient222F |
| 150 | Patient222C  | Patient252F |
| 150 | Patient230D  | Patient261G |
| 150 | Patient252D  | Patient263A |
| 151 | Patient079A2 | Patient104B |
| 151 | Patient093D  | Patient236A |
| 151 | Patient093E  | Patient265  |
| 151 | Patient094A  | Patient218B |
| 151 | Patient094B  | Patient252A |
| 151 | Patient094D  | Patient201A |
| 151 | Patient094E  | Patient126D |
| 151 | Patient097A  | Patient201E |
| 151 | Patient097B  | Patient149B |
| 151 | Patient097B  | Patient220A |
| 151 | Patient097B  | Patient222C |
| 151 | Patient097B  | Patient236A |
| 151 | Patient097C  | Patient222B |
| 151 | Patient097C  | Patient222F |
| 151 | Patient097D  | Patient201B |
| 151 | Patient097D  | Patient222F |
| 151 | Patient097D  | Patient265  |
| 151 | Patient097E  | Patient187  |
| 151 | Patient097E  | Patient201B |
| 151 | Patient097E  | Patient265  |
| 151 | Patient100A  | Patient252D |
| 151 | Patient108A  | Patient218A |
| 151 | Patient108A  | Patient222B |
| 151 | Patient108B1 | Patient236B |
| 151 | Patient108F  | Patient236B |
| 151 | Patient108G  | Patient236A |
| 151 | Patient108G  | Patient265  |
| 151 | Patient108H  | Patient263B |
| 151 | Patient109A  | Patient126E |
| 151 | Patient109A  | Patient187  |
| 151 | Patient109C  | Patient149B |
| 151 | Patient109D  | Patient236B |
| 151 | Patient126E  | Patient127B |



|     |              |             |
|-----|--------------|-------------|
| 151 | Patient127A  | Patient196F |
| 151 | Patient127A  | Patient222A |
| 151 | Patient127B  | Patient196A |
| 151 | Patient127B  | Patient222C |
| 151 | Patient141D  | Patient224B |
| 151 | Patient184   | Patient222F |
| 151 | Patient187   | Patient196A |
| 151 | Patient187   | Patient218A |
| 151 | Patient187   | Patient222F |
| 151 | Patient196A  | Patient222E |
| 151 | Patient196C  | Patient222E |
| 151 | Patient222A  | Patient252B |
| 151 | Patient222B  | Patient252A |
| 151 | Patient222E  | Patient252B |
| 151 | Patient222F  | Patient252A |
| 151 | Patient230A  | Patient261G |
| 152 | Patient032D  | Patient066D |
| 152 | Patient079A1 | Patient201A |
| 152 | Patient093B  | Patient099A |
| 152 | Patient093C  | Patient157  |
| 152 | Patient093C  | Patient218B |
| 152 | Patient093E  | Patient149B |
| 152 | Patient093E  | Patient218A |
| 152 | Patient093E  | Patient236A |
| 152 | Patient093E  | Patient252F |
| 152 | Patient094A  | Patient149A |
| 152 | Patient094A  | Patient196A |
| 152 | Patient094B  | Patient236A |
| 152 | Patient094C  | Patient187  |
| 152 | Patient094D  | Patient196E |
| 152 | Patient094D  | Patient222B |
| 152 | Patient094D  | Patient222E |
| 152 | Patient094D  | Patient252F |
| 152 | Patient094D  | Patient263B |
| 152 | Patient094E  | Patient131  |
| 152 | Patient094E  | Patient196C |
| 152 | Patient094E  | Patient196E |
| 152 | Patient094E  | Patient222F |
| 152 | Patient097A  | Patient196E |
| 152 | Patient097B  | Patient222A |
| 152 | Patient097C  | Patient196F |
| 152 | Patient097D  | Patient196F |
| 152 | Patient097D  | Patient222B |
| 152 | Patient097E  | Patient222D |
| 152 | Patient108A  | Patient196F |
| 152 | Patient108B1 | Patient159  |
| 152 | Patient108B2 | Patient159  |
| 152 | Patient108D  | Patient222A |
| 152 | Patient108F  | Patient149B |
| 152 | Patient108G  | Patient222C |

|     |              |             |
|-----|--------------|-------------|
| 152 | Patient108G  | Patient263B |
| 152 | Patient108H  | Patient220A |
| 152 | Patient108H  | Patient265  |
| 152 | Patient109A  | Patient222C |
| 152 | Patient109C  | Patient263A |
| 152 | Patient109E  | Patient236A |
| 152 | Patient126E  | Patient252A |
| 152 | Patient127B  | Patient187  |
| 152 | Patient159   | Patient265  |
| 152 | Patient184   | Patient222B |
| 152 | Patient187   | Patient196B |
| 152 | Patient187   | Patient222B |
| 152 | Patient196B  | Patient222E |
| 152 | Patient196C  | Patient222A |
| 152 | Patient196E  | Patient222A |
| 152 | Patient196E  | Patient222F |
| 152 | Patient196F  | Patient222D |
| 152 | Patient196F  | Patient252B |
| 152 | Patient224A  | Patient230A |
| 152 | Patient224A  | Patient230F |
| 152 | Patient252D  | Patient263B |
| 153 | Patient032D  | Patient224B |
| 153 | Patient066D  | Patient224A |
| 153 | Patient079A1 | Patient099A |
| 153 | Patient079A1 | Patient099B |
| 153 | Patient079A1 | Patient104A |
| 153 | Patient079A1 | Patient201E |
| 153 | Patient079A2 | Patient201A |
| 153 | Patient079B  | Patient104B |
| 153 | Patient079C  | Patient201E |
| 153 | Patient093A  | Patient265  |
| 153 | Patient093E  | Patient196A |
| 153 | Patient093E  | Patient196B |
| 153 | Patient093E  | Patient218B |
| 153 | Patient094A  | Patient126E |
| 153 | Patient094B  | Patient265  |
| 153 | Patient094C  | Patient131  |
| 153 | Patient094E  | Patient222A |
| 153 | Patient094E  | Patient252A |
| 153 | Patient097B  | Patient265  |
| 153 | Patient097C  | Patient263A |
| 153 | Patient097D  | Patient196A |
| 153 | Patient097D  | Patient263B |
| 153 | Patient097E  | Patient196B |
| 153 | Patient097E  | Patient222F |
| 153 | Patient097E  | Patient263B |
| 153 | Patient099A  | Patient252D |
| 153 | Patient103C  | Patient141D |
| 153 | Patient108B1 | Patient149B |
| 153 | Patient108B2 | Patient236B |

|     |              |             |
|-----|--------------|-------------|
| 153 | Patient108D  | Patient196A |
| 153 | Patient108D  | Patient196B |
| 153 | Patient108D  | Patient196F |
| 153 | Patient108D  | Patient222B |
| 153 | Patient108D  | Patient222F |
| 153 | Patient108F  | Patient159  |
| 153 | Patient109A  | Patient196A |
| 153 | Patient109B  | Patient126E |
| 153 | Patient109B  | Patient187  |
| 153 | Patient109B  | Patient222C |
| 153 | Patient109D  | Patient149B |
| 153 | Patient109D  | Patient159  |
| 153 | Patient126D  | Patient222C |
| 153 | Patient126D  | Patient252D |
| 153 | Patient127A  | Patient218A |
| 153 | Patient127A  | Patient222E |
| 153 | Patient127B  | Patient196B |
| 153 | Patient127B  | Patient222A |
| 153 | Patient127B  | Patient252A |
| 153 | Patient141D  | Patient224A |
| 153 | Patient159   | Patient220A |
| 153 | Patient184   | Patient222E |
| 153 | Patient187   | Patient218B |
| 153 | Patient187   | Patient222E |
| 153 | Patient196A  | Patient252B |
| 153 | Patient196F  | Patient222E |
| 153 | Patient222C  | Patient236B |
| 153 | Patient222E  | Patient252A |
| 153 | Patient236B  | Patient252B |
| 154 | Patient045D  | Patient196F |
| 154 | Patient066E  | Patient141D |
| 154 | Patient079A2 | Patient099A |
| 154 | Patient079A2 | Patient099B |
| 154 | Patient079A2 | Patient201E |
| 154 | Patient079B  | Patient201B |
| 154 | Patient079C  | Patient104A |
| 154 | Patient079C  | Patient201A |
| 154 | Patient079C  | Patient222D |
| 154 | Patient093A  | Patient149B |
| 154 | Patient093A  | Patient196B |
| 154 | Patient093A  | Patient218A |
| 154 | Patient093A  | Patient252F |
| 154 | Patient093B  | Patient099B |
| 154 | Patient093C  | Patient100A |
| 154 | Patient093D  | Patient252F |
| 154 | Patient093D  | Patient265  |
| 154 | Patient093E  | Patient126E |
| 154 | Patient094A  | Patient222F |
| 154 | Patient094C  | Patient236B |
| 154 | Patient094C  | Patient252A |

|     |             |             |
|-----|-------------|-------------|
| 154 | Patient094C | Patient252B |
| 154 | Patient094E | Patient263B |
| 154 | Patient097A | Patient218A |
| 154 | Patient097B | Patient201B |
| 154 | Patient097B | Patient222B |
| 154 | Patient097B | Patient222F |
| 154 | Patient097C | Patient201A |
| 154 | Patient097C | Patient201E |
| 154 | Patient097C | Patient222D |
| 154 | Patient097C | Patient222E |
| 154 | Patient097D | Patient201A |
| 154 | Patient097E | Patient196A |
| 154 | Patient097E | Patient222A |
| 154 | Patient097E | Patient222B |
| 154 | Patient097E | Patient222E |
| 154 | Patient097E | Patient263A |
| 154 | Patient104B | Patient108A |
| 154 | Patient108A | Patient222E |
| 154 | Patient108G | Patient126E |
| 154 | Patient108G | Patient187  |
| 154 | Patient108H | Patient222C |
| 154 | Patient109A | Patient196B |
| 154 | Patient109C | Patient220A |
| 154 | Patient109C | Patient263B |
| 154 | Patient109E | Patient220A |
| 154 | Patient109E | Patient263A |
| 154 | Patient126E | Patient236B |
| 154 | Patient126E | Patient252F |
| 154 | Patient127A | Patient196C |
| 154 | Patient127B | Patient196F |
| 154 | Patient127B | Patient222B |
| 154 | Patient127B | Patient222E |
| 154 | Patient127B | Patient222F |
| 154 | Patient127B | Patient252B |
| 154 | Patient149A | Patient252D |
| 154 | Patient149B | Patient159  |
| 154 | Patient181B | Patient224A |
| 154 | Patient184  | Patient196C |
| 154 | Patient184  | Patient218A |
| 154 | Patient184  | Patient252F |
| 154 | Patient187  | Patient252F |
| 154 | Patient196B | Patient252A |
| 154 | Patient196C | Patient222B |
| 154 | Patient196D | Patient213B |
| 154 | Patient196E | Patient222B |
| 154 | Patient222A | Patient252A |
| 154 | Patient222F | Patient252F |
| 155 | Patient032A | Patient224B |
| 155 | Patient032D | Patient066E |
| 155 | Patient032E | Patient224B |

|     |              |             |
|-----|--------------|-------------|
| 155 | Patient079A1 | Patient222D |
| 155 | Patient079A2 | Patient104A |
| 155 | Patient079A2 | Patient222D |
| 155 | Patient079B  | Patient201A |
| 155 | Patient079C  | Patient099A |
| 155 | Patient079C  | Patient099B |
| 155 | Patient093A  | Patient218B |
| 155 | Patient093B  | Patient099E |
| 155 | Patient093C  | Patient099A |
| 155 | Patient093E  | Patient157  |
| 155 | Patient094A  | Patient099A |
| 155 | Patient094A  | Patient196E |
| 155 | Patient094A  | Patient263B |
| 155 | Patient094B  | Patient222E |
| 155 | Patient094D  | Patient201E |
| 155 | Patient094D  | Patient218A |
| 155 | Patient094E  | Patient201A |
| 155 | Patient094E  | Patient201B |
| 155 | Patient094E  | Patient222B |
| 155 | Patient094E  | Patient222E |
| 155 | Patient097B  | Patient196A |
| 155 | Patient097B  | Patient196B |
| 155 | Patient097C  | Patient196C |
| 155 | Patient097C  | Patient196E |
| 155 | Patient097C  | Patient263B |
| 155 | Patient097D  | Patient196E |
| 155 | Patient097D  | Patient201E |
| 155 | Patient097D  | Patient263A |
| 155 | Patient097E  | Patient196F |
| 155 | Patient099E  | Patient252D |
| 155 | Patient104B  | Patient108D |
| 155 | Patient108A  | Patient196C |
| 155 | Patient108A  | Patient218B |
| 155 | Patient108B1 | Patient220A |
| 155 | Patient108B1 | Patient265  |
| 155 | Patient108B2 | Patient149B |
| 155 | Patient108B2 | Patient236A |
| 155 | Patient108D  | Patient218A |
| 155 | Patient108F  | Patient236A |
| 155 | Patient109A  | Patient218A |
| 155 | Patient109A  | Patient222A |
| 155 | Patient109A  | Patient222B |
| 155 | Patient109A  | Patient222F |
| 155 | Patient109C  | Patient265  |
| 155 | Patient109D  | Patient220A |
| 155 | Patient109D  | Patient236A |
| 155 | Patient109D  | Patient263A |
| 155 | Patient109E  | Patient265  |
| 155 | Patient126E  | Patient196C |
| 155 | Patient126E  | Patient196E |

|     |              |             |
|-----|--------------|-------------|
| 155 | Patient127A  | Patient196E |
| 155 | Patient127A  | Patient252F |
| 155 | Patient149A  | Patient222C |
| 155 | Patient159   | Patient263A |
| 155 | Patient181B  | Patient261G |
| 155 | Patient184   | Patient196E |
| 155 | Patient187   | Patient196C |
| 155 | Patient189A  | Patient222C |
| 155 | Patient196A  | Patient252A |
| 155 | Patient196E  | Patient222D |
| 155 | Patient196E  | Patient222E |
| 155 | Patient196F  | Patient252A |
| 155 | Patient236B  | Patient252A |
| 156 | Patient032A  | Patient066D |
| 156 | Patient032D  | Patient224A |
| 156 | Patient032E  | Patient066D |
| 156 | Patient066D  | Patient141G |
| 156 | Patient093A  | Patient099A |
| 156 | Patient093A  | Patient100A |
| 156 | Patient093A  | Patient222F |
| 156 | Patient093B  | Patient222D |
| 156 | Patient093D  | Patient149B |
| 156 | Patient093D  | Patient157  |
| 156 | Patient093E  | Patient100A |
| 156 | Patient093E  | Patient222F |
| 156 | Patient094A  | Patient099B |
| 156 | Patient094A  | Patient126D |
| 156 | Patient094A  | Patient196C |
| 156 | Patient094B  | Patient222F |
| 156 | Patient094B  | Patient252F |
| 156 | Patient094C  | Patient236A |
| 156 | Patient094E  | Patient201E |
| 156 | Patient094E  | Patient252F |
| 156 | Patient097A  | Patient218B |
| 156 | Patient097B  | Patient201A |
| 156 | Patient097B  | Patient263B |
| 156 | Patient097D  | Patient222E |
| 156 | Patient097E  | Patient196C |
| 156 | Patient097E  | Patient201A |
| 156 | Patient097E  | Patient201E |
| 156 | Patient100A  | Patient222C |
| 156 | Patient103C  | Patient141G |
| 156 | Patient108A  | Patient196E |
| 156 | Patient108B1 | Patient236A |
| 156 | Patient108D  | Patient222E |
| 156 | Patient108G  | Patient222A |
| 156 | Patient109B  | Patient196A |
| 156 | Patient109B  | Patient222A |
| 156 | Patient109C  | Patient222C |
| 156 | Patient109D  | Patient263B |

|     |              |             |
|-----|--------------|-------------|
| 156 | Patient109E  | Patient222C |
| 156 | Patient109E  | Patient263B |
| 156 | Patient126E  | Patient218A |
| 156 | Patient127B  | Patient218A |
| 156 | Patient141D  | Patient230G |
| 156 | Patient141G  | Patient224B |
| 156 | Patient159   | Patient222D |
| 156 | Patient159   | Patient263B |
| 156 | Patient184   | Patient218B |
| 156 | Patient187   | Patient196F |
| 156 | Patient187   | Patient236B |
| 156 | Patient189B  | Patient222C |
| 156 | Patient196B  | Patient236B |
| 156 | Patient196C  | Patient252B |
| 156 | Patient196E  | Patient252B |
| 156 | Patient201B  | Patient213B |
| 156 | Patient218B  | Patient252B |
| 156 | Patient222B  | Patient252F |
| 156 | Patient222E  | Patient252F |
| 156 | Patient241   | Patient242  |
| 157 | Patient005   | Patient066B |
| 157 | Patient028   | Patient093B |
| 157 | Patient032D  | Patient141C |
| 157 | Patient066F  | Patient141D |
| 157 | Patient079A1 | Patient099E |
| 157 | Patient079B  | Patient104A |
| 157 | Patient093A  | Patient157  |
| 157 | Patient093A  | Patient196A |
| 157 | Patient093A  | Patient196C |
| 157 | Patient093B  | Patient099C |
| 157 | Patient093B  | Patient099D |
| 157 | Patient093D  | Patient196B |
| 157 | Patient093E  | Patient222A |
| 157 | Patient094A  | Patient157  |
| 157 | Patient094A  | Patient201B |
| 157 | Patient094A  | Patient222B |
| 157 | Patient094B  | Patient149B |
| 157 | Patient094D  | Patient218B |
| 157 | Patient097C  | Patient218A |
| 157 | Patient097D  | Patient196C |
| 157 | Patient097D  | Patient218A |
| 157 | Patient104A  | Patient108D |
| 157 | Patient104B  | Patient109A |
| 157 | Patient108B2 | Patient220A |
| 157 | Patient108D  | Patient218B |
| 157 | Patient108F  | Patient220A |
| 157 | Patient108F  | Patient222C |
| 157 | Patient108F  | Patient263A |
| 157 | Patient108H  | Patient126E |
| 157 | Patient109A  | Patient196F |

|     |              |             |
|-----|--------------|-------------|
| 157 | Patient109B  | Patient196B |
| 157 | Patient109B  | Patient222B |
| 157 | Patient109B  | Patient222F |
| 157 | Patient109D  | Patient265  |
| 157 | Patient109E  | Patient126E |
| 157 | Patient109E  | Patient187  |
| 157 | Patient127A  | Patient218B |
| 157 | Patient127B  | Patient196C |
| 157 | Patient149B  | Patient222C |
| 157 | Patient157   | Patient213B |
| 157 | Patient189E  | Patient222C |
| 157 | Patient196A  | Patient236B |
| 157 | Patient196B  | Patient252F |
| 157 | Patient196F  | Patient236B |
| 157 | Patient218A  | Patient222C |
| 157 | Patient220A  | Patient252B |
| 157 | Patient222D  | Patient252D |
| 158 | Patient032A  | Patient224A |
| 158 | Patient032D  | Patient066F |
| 158 | Patient032E  | Patient224A |
| 158 | Patient045D  | Patient187  |
| 158 | Patient066E  | Patient141G |
| 158 | Patient079A2 | Patient099E |
| 158 | Patient079B  | Patient201E |
| 158 | Patient079C  | Patient099E |
| 158 | Patient093A  | Patient126E |
| 158 | Patient093A  | Patient222E |
| 158 | Patient093B  | Patient104B |
| 158 | Patient093B  | Patient196D |
| 158 | Patient093C  | Patient099B |
| 158 | Patient093C  | Patient099E |
| 158 | Patient093D  | Patient218A |
| 158 | Patient093D  | Patient218B |
| 158 | Patient093E  | Patient099A |
| 158 | Patient093E  | Patient149A |
| 158 | Patient093E  | Patient196C |
| 158 | Patient093E  | Patient196E |
| 158 | Patient093E  | Patient201B |
| 158 | Patient093E  | Patient222B |
| 158 | Patient093E  | Patient222E |
| 158 | Patient094A  | Patient099E |
| 158 | Patient094A  | Patient201A |
| 158 | Patient094B  | Patient196B |
| 158 | Patient094B  | Patient222D |
| 158 | Patient094D  | Patient100A |
| 158 | Patient094E  | Patient218A |
| 158 | Patient097B  | Patient201E |
| 158 | Patient097B  | Patient263A |
| 158 | Patient097E  | Patient196E |
| 158 | Patient099B  | Patient252D |



|     |              |              |
|-----|--------------|--------------|
| 158 | Patient099C  | Patient252D  |
| 158 | Patient104A  | Patient108A  |
| 158 | Patient104B  | Patient109B  |
| 158 | Patient108A  | Patient157   |
| 158 | Patient108B1 | Patient187   |
| 158 | Patient108B1 | Patient263B  |
| 158 | Patient108B2 | Patient265   |
| 158 | Patient108D  | Patient196C  |
| 158 | Patient108F  | Patient265   |
| 158 | Patient108G  | Patient196A  |
| 158 | Patient108G  | Patient222B  |
| 158 | Patient108G  | Patient222F  |
| 158 | Patient108H  | Patient187   |
| 158 | Patient108H  | Patient196B  |
| 158 | Patient108H  | Patient196F  |
| 158 | Patient109B  | Patient222E  |
| 158 | Patient109E  | Patient196F  |
| 158 | Patient126E  | Patient149A  |
| 158 | Patient126E  | Patient218B  |
| 158 | Patient127A  | Patient201B  |
| 158 | Patient149A  | Patient159   |
| 158 | Patient149A  | Patient222A  |
| 158 | Patient149B  | Patient252B  |
| 158 | Patient187   | Patient196E  |
| 158 | Patient187   | Patient236A  |
| 158 | Patient213B  | Patient232B  |
| 158 | Patient218A  | Patient252B  |
| 158 | Patient218B  | Patient222C  |
| 158 | Patient220A  | Patient222C  |
| 158 | Patient220A  | Patient252A  |
| 158 | Patient222A  | Patient252F  |
| 158 | Patient222C  | Patient236A  |
| 158 | Patient222F  | Patient236B  |
| 158 | Patient224A  | Patient230E  |
| 158 | Patient230B  | Patient261G  |
| 158 | Patient236A  | Patient252B  |
| 158 | Patient236B  | Patient252F  |
| 159 | Patient028   | Patient108B2 |
| 159 | Patient028   | Patient213B  |
| 159 | Patient032A  | Patient066E  |
| 159 | Patient032B  | Patient224B  |
| 159 | Patient032C  | Patient224B  |
| 159 | Patient032D  | Patient141B  |
| 159 | Patient032D  | Patient230G  |
| 159 | Patient032E  | Patient066E  |
| 159 | Patient034A  | Patient066D  |
| 159 | Patient034A  | Patient224B  |
| 159 | Patient066E  | Patient224A  |
| 159 | Patient074B  | Patient230G  |
| 159 | Patient079A1 | Patient099C  |

|     |              |             |
|-----|--------------|-------------|
| 159 | Patient079A2 | Patient099C |
| 159 | Patient079B  | Patient099A |
| 159 | Patient079B  | Patient099B |
| 159 | Patient079B  | Patient222D |
| 159 | Patient093A  | Patient126D |
| 159 | Patient093A  | Patient196E |
| 159 | Patient093A  | Patient201A |
| 159 | Patient093A  | Patient263B |
| 159 | Patient093B  | Patient222C |
| 159 | Patient093C  | Patient222D |
| 159 | Patient093E  | Patient099B |
| 159 | Patient093E  | Patient126D |
| 159 | Patient093E  | Patient201A |
| 159 | Patient093E  | Patient263B |
| 159 | Patient094A  | Patient201E |
| 159 | Patient094B  | Patient126E |
| 159 | Patient094B  | Patient196A |
| 159 | Patient094B  | Patient196C |
| 159 | Patient094B  | Patient218A |
| 159 | Patient094B  | Patient218B |
| 159 | Patient094E  | Patient218B |
| 159 | Patient097B  | Patient222E |
| 159 | Patient099B  | Patient222C |
| 159 | Patient100A  | Patient126E |
| 159 | Patient100A  | Patient159  |
| 159 | Patient108B2 | Patient187  |
| 159 | Patient108B2 | Patient263B |
| 159 | Patient108D  | Patient196E |
| 159 | Patient108F  | Patient263B |
| 159 | Patient108G  | Patient196B |
| 159 | Patient109A  | Patient222E |
| 159 | Patient109B  | Patient196F |
| 159 | Patient109B  | Patient218A |
| 159 | Patient109C  | Patient126E |
| 159 | Patient109C  | Patient196F |
| 159 | Patient109D  | Patient126E |
| 159 | Patient109E  | Patient196B |
| 159 | Patient126E  | Patient220A |
| 159 | Patient126E  | Patient236A |
| 159 | Patient126E  | Patient265  |
| 159 | Patient127B  | Patient196E |
| 159 | Patient127B  | Patient252F |
| 159 | Patient141G  | Patient224A |
| 159 | Patient149A  | Patient196A |
| 159 | Patient149A  | Patient196B |
| 159 | Patient149A  | Patient222B |
| 159 | Patient149A  | Patient222F |
| 159 | Patient196A  | Patient218A |
| 159 | Patient213B  | Patient232D |
| 159 | Patient218A  | Patient222A |

|     |              |             |
|-----|--------------|-------------|
| 159 | Patient218A  | Patient252A |
| 159 | Patient218B  | Patient252A |
| 159 | Patient222A  | Patient236B |
| 159 | Patient222B  | Patient236B |
| 159 | Patient222D  | Patient236B |
| 159 | Patient224A  | Patient230B |
| 159 | Patient230D  | Patient261B |
| 159 | Patient236A  | Patient252A |
| 160 | Patient032A  | Patient066F |
| 160 | Patient032B  | Patient066D |
| 160 | Patient032C  | Patient066D |
| 160 | Patient032E  | Patient066F |
| 160 | Patient066F  | Patient224A |
| 160 | Patient074B  | Patient141G |
| 160 | Patient079A1 | Patient099D |
| 160 | Patient079C  | Patient099C |
| 160 | Patient079C  | Patient099D |
| 160 | Patient093A  | Patient149A |
| 160 | Patient093A  | Patient201B |
| 160 | Patient093A  | Patient222B |
| 160 | Patient093D  | Patient126D |
| 160 | Patient093D  | Patient196C |
| 160 | Patient093D  | Patient222E |
| 160 | Patient094A  | Patient099C |
| 160 | Patient094A  | Patient222A |
| 160 | Patient094A  | Patient222E |
| 160 | Patient094B  | Patient157  |
| 160 | Patient094B  | Patient201B |
| 160 | Patient094B  | Patient222B |
| 160 | Patient094C  | Patient252F |
| 160 | Patient094C  | Patient265  |
| 160 | Patient094D  | Patient099A |
| 160 | Patient094D  | Patient157  |
| 160 | Patient097B  | Patient196F |
| 160 | Patient097D  | Patient218B |
| 160 | Patient097E  | Patient218A |
| 160 | Patient099A  | Patient159  |
| 160 | Patient099A  | Patient222C |
| 160 | Patient103C  | Patient141F |
| 160 | Patient104B  | Patient108G |
| 160 | Patient108B1 | Patient196A |
| 160 | Patient108F  | Patient126E |
| 160 | Patient108F  | Patient187  |
| 160 | Patient108G  | Patient196F |
| 160 | Patient108G  | Patient218A |
| 160 | Patient108H  | Patient222F |
| 160 | Patient109A  | Patient157  |
| 160 | Patient109A  | Patient196C |
| 160 | Patient109A  | Patient196E |
| 160 | Patient109A  | Patient218B |

|     |              |             |
|-----|--------------|-------------|
| 160 | Patient109C  | Patient187  |
| 160 | Patient109C  | Patient196B |
| 160 | Patient109D  | Patient187  |
| 160 | Patient109D  | Patient222C |
| 160 | Patient109E  | Patient196A |
| 160 | Patient126E  | Patient149B |
| 160 | Patient127B  | Patient201B |
| 160 | Patient141C  | Patient224A |
| 160 | Patient141C  | Patient230G |
| 160 | Patient141F  | Patient224B |
| 160 | Patient149B  | Patient187  |
| 160 | Patient184   | Patient201B |
| 160 | Patient187   | Patient220A |
| 160 | Patient196A  | Patient252F |
| 160 | Patient196B  | Patient218A |
| 160 | Patient196C  | Patient252A |
| 160 | Patient196E  | Patient252A |
| 160 | Patient196F  | Patient236A |
| 160 | Patient196F  | Patient252F |
| 160 | Patient201A  | Patient213B |
| 160 | Patient213B  | Patient232A |
| 160 | Patient218A  | Patient222B |
| 160 | Patient218A  | Patient222F |
| 160 | Patient222C  | Patient265  |
| 160 | Patient222E  | Patient236B |
| 160 | Patient232B  | Patient252D |
| 160 | Patient252B  | Patient265  |
| 161 | Patient028   | Patient093C |
| 161 | Patient028   | Patient097A |
| 161 | Patient032B  | Patient224A |
| 161 | Patient032D  | Patient141A |
| 161 | Patient032D  | Patient141D |
| 161 | Patient032E  | Patient141C |
| 161 | Patient066D  | Patient141F |
| 161 | Patient066F  | Patient141G |
| 161 | Patient074A  | Patient230G |
| 161 | Patient079A1 | Patient196D |
| 161 | Patient079C  | Patient196D |
| 161 | Patient093A  | Patient099B |
| 161 | Patient093A  | Patient222A |
| 161 | Patient093B  | Patient196F |
| 161 | Patient093C  | Patient099C |
| 161 | Patient093C  | Patient099D |
| 161 | Patient093C  | Patient104B |
| 161 | Patient093C  | Patient196D |
| 161 | Patient093D  | Patient100A |
| 161 | Patient093D  | Patient126E |
| 161 | Patient093D  | Patient196A |
| 161 | Patient093D  | Patient201B |
| 161 | Patient093D  | Patient222F |

|     |              |             |
|-----|--------------|-------------|
| 161 | Patient093D  | Patient263B |
| 161 | Patient094A  | Patient104B |
| 161 | Patient094A  | Patient196D |
| 161 | Patient094B  | Patient126D |
| 161 | Patient094B  | Patient201A |
| 161 | Patient094B  | Patient263B |
| 161 | Patient094C  | Patient218A |
| 161 | Patient094E  | Patient100A |
| 161 | Patient097B  | Patient218A |
| 161 | Patient097C  | Patient218B |
| 161 | Patient099D  | Patient252D |
| 161 | Patient099E  | Patient222C |
| 161 | Patient100A  | Patient127A |
| 161 | Patient103A  | Patient141C |
| 161 | Patient103B  | Patient141D |
| 161 | Patient103B  | Patient141G |
| 161 | Patient103C  | Patient230G |
| 161 | Patient104A  | Patient109A |
| 161 | Patient104B  | Patient184  |
| 161 | Patient104B  | Patient213B |
| 161 | Patient108B1 | Patient196B |
| 161 | Patient108D  | Patient157  |
| 161 | Patient108F  | Patient196F |
| 161 | Patient108G  | Patient222E |
| 161 | Patient108H  | Patient196A |
| 161 | Patient108H  | Patient218A |
| 161 | Patient108H  | Patient222B |
| 161 | Patient109B  | Patient157  |
| 161 | Patient109B  | Patient218B |
| 161 | Patient109C  | Patient196A |
| 161 | Patient109D  | Patient196A |
| 161 | Patient109E  | Patient222A |
| 161 | Patient109E  | Patient222F |
| 161 | Patient126D  | Patient159  |
| 161 | Patient127A  | Patient201A |
| 161 | Patient127B  | Patient218B |
| 161 | Patient141B  | Patient230G |
| 161 | Patient149B  | Patient196B |
| 161 | Patient149B  | Patient222A |
| 161 | Patient149B  | Patient222F |
| 161 | Patient159   | Patient201B |
| 161 | Patient189E  | Patient196F |
| 161 | Patient196A  | Patient236A |
| 161 | Patient196B  | Patient236A |
| 161 | Patient196C  | Patient236B |
| 161 | Patient196E  | Patient236B |
| 161 | Patient213B  | Patient232E |
| 161 | Patient218B  | Patient222A |
| 161 | Patient222D  | Patient236A |
| 161 | Patient252A  | Patient265  |

|     |              |              |
|-----|--------------|--------------|
| 162 | Patient028   | Patient108B1 |
| 162 | Patient032A  | Patient141C  |
| 162 | Patient032D  | Patient230C  |
| 162 | Patient032E  | Patient141B  |
| 162 | Patient034A  | Patient066E  |
| 162 | Patient034B  | Patient224B  |
| 162 | Patient034D  | Patient224B  |
| 162 | Patient034E  | Patient066D  |
| 162 | Patient066E  | Patient141F  |
| 162 | Patient079A2 | Patient099D  |
| 162 | Patient079A2 | Patient196D  |
| 162 | Patient079B  | Patient099E  |
| 162 | Patient093A  | Patient099C  |
| 162 | Patient093A  | Patient099E  |
| 162 | Patient093A  | Patient222D  |
| 162 | Patient093B  | Patient104A  |
| 162 | Patient093C  | Patient222C  |
| 162 | Patient093D  | Patient196E  |
| 162 | Patient093D  | Patient201A  |
| 162 | Patient093E  | Patient099E  |
| 162 | Patient093E  | Patient201E  |
| 162 | Patient093E  | Patient222D  |
| 162 | Patient094B  | Patient222A  |
| 162 | Patient094C  | Patient149B  |
| 162 | Patient094C  | Patient196B  |
| 162 | Patient094C  | Patient218B  |
| 162 | Patient094D  | Patient099B  |
| 162 | Patient094D  | Patient099E  |
| 162 | Patient097A  | Patient099A  |
| 162 | Patient097A  | Patient104B  |
| 162 | Patient097B  | Patient196E  |
| 162 | Patient097E  | Patient218B  |
| 162 | Patient099A  | Patient127A  |
| 162 | Patient099B  | Patient126E  |
| 162 | Patient099B  | Patient159   |
| 162 | Patient100A  | Patient184   |
| 162 | Patient100A  | Patient222F  |
| 162 | Patient104A  | Patient109B  |
| 162 | Patient104A  | Patient213B  |
| 162 | Patient104B  | Patient108H  |
| 162 | Patient108B1 | Patient222A  |
| 162 | Patient108B2 | Patient196A  |
| 162 | Patient108F  | Patient222A  |
| 162 | Patient108F  | Patient222F  |
| 162 | Patient108G  | Patient218B  |
| 162 | Patient108H  | Patient222A  |
| 162 | Patient109C  | Patient222A  |
| 162 | Patient109C  | Patient222F  |
| 162 | Patient109D  | Patient196B  |
| 162 | Patient109E  | Patient222B  |

|     |              |             |
|-----|--------------|-------------|
| 162 | Patient141B  | Patient224A |
| 162 | Patient141C  | Patient230C |
| 162 | Patient149A  | Patient196F |
| 162 | Patient149B  | Patient222B |
| 162 | Patient149B  | Patient222D |
| 162 | Patient159   | Patient196D |
| 162 | Patient159   | Patient232B |
| 162 | Patient184   | Patient201A |
| 162 | Patient189B  | Patient196F |
| 162 | Patient201E  | Patient213B |
| 162 | Patient218A  | Patient236B |
| 162 | Patient218B  | Patient222B |
| 162 | Patient218B  | Patient222F |
| 162 | Patient220A  | Patient222A |
| 162 | Patient220A  | Patient222B |
| 162 | Patient220A  | Patient222F |
| 162 | Patient222F  | Patient236A |
| 162 | Patient230D  | Patient261A |
| 162 | Patient236A  | Patient252F |
| 162 | Patient252A  | Patient263A |
| 163 | Patient023   | Patient093E |
| 163 | Patient023   | Patient094A |
| 163 | Patient028   | Patient108D |
| 163 | Patient028   | Patient157  |
| 163 | Patient032A  | Patient141B |
| 163 | Patient032A  | Patient230G |
| 163 | Patient032B  | Patient066E |
| 163 | Patient032C  | Patient066E |
| 163 | Patient032C  | Patient066F |
| 163 | Patient032D  | Patient261C |
| 163 | Patient032E  | Patient141D |
| 163 | Patient034A  | Patient224A |
| 163 | Patient034B  | Patient066D |
| 163 | Patient034D  | Patient066D |
| 163 | Patient034E  | Patient224B |
| 163 | Patient045D  | Patient127A |
| 163 | Patient074B  | Patient141F |
| 163 | Patient079A1 | Patient232A |
| 163 | Patient079A1 | Patient232B |
| 163 | Patient079C  | Patient232B |
| 163 | Patient093A  | Patient201E |
| 163 | Patient093D  | Patient099A |
| 163 | Patient093D  | Patient222B |
| 163 | Patient093E  | Patient099C |
| 163 | Patient094A  | Patient099D |
| 163 | Patient094B  | Patient099A |
| 163 | Patient094B  | Patient100A |
| 163 | Patient094B  | Patient201E |
| 163 | Patient094C  | Patient157  |
| 163 | Patient094C  | Patient196C |

|     |              |             |
|-----|--------------|-------------|
| 163 | Patient094E  | Patient157  |
| 163 | Patient097B  | Patient196C |
| 163 | Patient097B  | Patient218B |
| 163 | Patient097D  | Patient157  |
| 163 | Patient099A  | Patient184  |
| 163 | Patient099E  | Patient159  |
| 163 | Patient100A  | Patient222A |
| 163 | Patient104A  | Patient184  |
| 163 | Patient104B  | Patient109E |
| 163 | Patient108B1 | Patient218A |
| 163 | Patient108B1 | Patient222B |
| 163 | Patient108B2 | Patient196B |
| 163 | Patient108B2 | Patient222E |
| 163 | Patient108B2 | Patient222F |
| 163 | Patient108F  | Patient196B |
| 163 | Patient108H  | Patient222E |
| 163 | Patient109B  | Patient196C |
| 163 | Patient109B  | Patient196E |
| 163 | Patient109D  | Patient196F |
| 163 | Patient109D  | Patient222A |
| 163 | Patient109D  | Patient222F |
| 163 | Patient109E  | Patient196C |
| 163 | Patient141B  | Patient230C |
| 163 | Patient141D  | Patient230C |
| 163 | Patient141F  | Patient224A |
| 163 | Patient149A  | Patient222E |
| 163 | Patient149B  | Patient196A |
| 163 | Patient149B  | Patient252A |
| 163 | Patient157   | Patient252D |
| 163 | Patient159   | Patient232D |
| 163 | Patient187   | Patient265  |
| 163 | Patient189A  | Patient196F |
| 163 | Patient196B  | Patient218B |
| 163 | Patient196C  | Patient252F |
| 163 | Patient196E  | Patient252F |
| 163 | Patient196F  | Patient218A |
| 163 | Patient213B  | Patient232C |
| 163 | Patient222A  | Patient236A |
| 163 | Patient222B  | Patient236A |
| 163 | Patient222E  | Patient236A |
| 163 | Patient252A  | Patient263B |
| 163 | Patient252B  | Patient263A |
| 164 | Patient023   | Patient093A |
| 164 | Patient032B  | Patient066F |
| 164 | Patient032C  | Patient224A |
| 164 | Patient032D  | Patient261E |
| 164 | Patient032E  | Patient074B |
| 164 | Patient045D  | Patient222F |
| 164 | Patient045D  | Patient236B |
| 164 | Patient074A  | Patient141G |



|     |              |             |
|-----|--------------|-------------|
| 164 | Patient079A1 | Patient232E |
| 164 | Patient079A2 | Patient232B |
| 164 | Patient093B  | Patient232B |
| 164 | Patient093B  | Patient263A |
| 164 | Patient093C  | Patient104A |
| 164 | Patient093D  | Patient149A |
| 164 | Patient093D  | Patient201E |
| 164 | Patient094B  | Patient196E |
| 164 | Patient094C  | Patient099A |
| 164 | Patient094C  | Patient100A |
| 164 | Patient094C  | Patient222E |
| 164 | Patient094C  | Patient222F |
| 164 | Patient097A  | Patient099B |
| 164 | Patient099A  | Patient108A |
| 164 | Patient099A  | Patient126E |
| 164 | Patient099B  | Patient127A |
| 164 | Patient099C  | Patient222C |
| 164 | Patient100A  | Patient222B |
| 164 | Patient103A  | Patient141B |
| 164 | Patient103A  | Patient141D |
| 164 | Patient104A  | Patient108G |
| 164 | Patient104B  | Patient127A |
| 164 | Patient108A  | Patient201B |
| 164 | Patient108B1 | Patient222F |
| 164 | Patient108B2 | Patient196C |
| 164 | Patient108B2 | Patient222A |
| 164 | Patient108D  | Patient201B |
| 164 | Patient108F  | Patient196A |
| 164 | Patient108F  | Patient222E |
| 164 | Patient108G  | Patient157  |
| 164 | Patient108H  | Patient157  |
| 164 | Patient108H  | Patient196C |
| 164 | Patient108H  | Patient196E |
| 164 | Patient109C  | Patient218A |
| 164 | Patient109C  | Patient222B |
| 164 | Patient109C  | Patient222E |
| 164 | Patient109D  | Patient218A |
| 164 | Patient109D  | Patient222B |
| 164 | Patient109E  | Patient218A |
| 164 | Patient109E  | Patient222E |
| 164 | Patient126D  | Patient184  |
| 164 | Patient127A  | Patient222D |
| 164 | Patient141A  | Patient224A |
| 164 | Patient149A  | Patient196C |
| 164 | Patient149A  | Patient196E |
| 164 | Patient149B  | Patient218A |
| 164 | Patient184   | Patient201E |
| 164 | Patient196A  | Patient218B |
| 164 | Patient196A  | Patient220A |
| 164 | Patient196A  | Patient265  |

|     |              |             |
|-----|--------------|-------------|
| 164 | Patient196B  | Patient220A |
| 164 | Patient196D  | Patient252D |
| 164 | Patient218A  | Patient220A |
| 164 | Patient218A  | Patient222E |
| 164 | Patient218B  | Patient252F |
| 164 | Patient222A  | Patient265  |
| 164 | Patient232A  | Patient252D |
| 164 | Patient232D  | Patient252D |
| 164 | Patient252B  | Patient263B |
| 165 | Patient028   | Patient094D |
| 165 | Patient028   | Patient108A |
| 165 | Patient028   | Patient252D |
| 165 | Patient032A  | Patient141D |
| 165 | Patient032C  | Patient141C |
| 165 | Patient032D  | Patient141G |
| 165 | Patient034A  | Patient066F |
| 165 | Patient034B  | Patient066E |
| 165 | Patient034B  | Patient224A |
| 165 | Patient034C  | Patient224B |
| 165 | Patient034D  | Patient066E |
| 165 | Patient045D  | Patient127B |
| 165 | Patient045D  | Patient218A |
| 165 | Patient045D  | Patient222A |
| 165 | Patient066F  | Patient141F |
| 165 | Patient074C  | Patient230G |
| 165 | Patient079A1 | Patient232D |
| 165 | Patient079A2 | Patient232A |
| 165 | Patient079A2 | Patient232D |
| 165 | Patient079A2 | Patient232E |
| 165 | Patient079B  | Patient196D |
| 165 | Patient079B  | Patient232B |
| 165 | Patient079C  | Patient232A |
| 165 | Patient079C  | Patient232C |
| 165 | Patient079C  | Patient232D |
| 165 | Patient093A  | Patient099D |
| 165 | Patient093D  | Patient099E |
| 165 | Patient093E  | Patient099D |
| 165 | Patient093E  | Patient104B |
| 165 | Patient094B  | Patient099E |
| 165 | Patient094B  | Patient149A |
| 165 | Patient094C  | Patient126E |
| 165 | Patient094C  | Patient196A |
| 165 | Patient094D  | Patient099C |
| 165 | Patient094E  | Patient099A |
| 165 | Patient097A  | Patient099E |
| 165 | Patient097B  | Patient157  |
| 165 | Patient097C  | Patient104B |
| 165 | Patient099A  | Patient222F |
| 165 | Patient099B  | Patient108A |
| 165 | Patient099B  | Patient222A |

|     |              |              |
|-----|--------------|--------------|
| 165 | Patient099C  | Patient159   |
| 165 | Patient100A  | Patient127B  |
| 165 | Patient100A  | Patient187   |
| 165 | Patient100A  | Patient196A  |
| 165 | Patient103A  | Patient141G  |
| 165 | Patient103A  | Patient224B  |
| 165 | Patient104B  | Patient108B1 |
| 165 | Patient104B  | Patient109C  |
| 165 | Patient108B1 | Patient218B  |
| 165 | Patient108B2 | Patient222B  |
| 165 | Patient108F  | Patient196C  |
| 165 | Patient108F  | Patient222B  |
| 165 | Patient108G  | Patient196C  |
| 165 | Patient108G  | Patient196E  |
| 165 | Patient108H  | Patient218B  |
| 165 | Patient109C  | Patient196C  |
| 165 | Patient109E  | Patient196E  |
| 165 | Patient126E  | Patient263B  |
| 165 | Patient127A  | Patient201E  |
| 165 | Patient127B  | Patient201A  |
| 165 | Patient141D  | Patient181A  |
| 165 | Patient149B  | Patient196F  |
| 165 | Patient149B  | Patient222E  |
| 165 | Patient159   | Patient232A  |
| 165 | Patient159   | Patient232C  |
| 165 | Patient159   | Patient232E  |
| 165 | Patient184   | Patient222D  |
| 165 | Patient187   | Patient222D  |
| 165 | Patient187   | Patient263B  |
| 165 | Patient196B  | Patient265   |
| 165 | Patient196C  | Patient236A  |
| 165 | Patient218A  | Patient252F  |
| 165 | Patient218B  | Patient222E  |
| 165 | Patient220A  | Patient252F  |
| 165 | Patient222B  | Patient265   |
| 165 | Patient222C  | Patient263B  |
| 165 | Patient222D  | Patient265   |
| 165 | Patient224A  | Patient230D  |
| 165 | Patient232C  | Patient252D  |
| 166 | Patient023   | Patient093D  |
| 166 | Patient032B  | Patient141C  |
| 166 | Patient032E  | Patient141A  |
| 166 | Patient034A  | Patient141B  |
| 166 | Patient034A  | Patient141C  |
| 166 | Patient034C  | Patient066D  |
| 166 | Patient034D  | Patient066F  |
| 166 | Patient034D  | Patient224A  |
| 166 | Patient034E  | Patient066E  |
| 166 | Patient034E  | Patient224A  |
| 166 | Patient045A  | Patient251   |

|     |              |             |
|-----|--------------|-------------|
| 166 | Patient045B  | Patient251  |
| 166 | Patient066D  | Patient103A |
| 166 | Patient074A  | Patient141F |
| 166 | Patient074B  | Patient261E |
| 166 | Patient079A1 | Patient232C |
| 166 | Patient079B  | Patient099D |
| 166 | Patient079C  | Patient232E |
| 166 | Patient093B  | Patient232D |
| 166 | Patient093C  | Patient196F |
| 166 | Patient093D  | Patient099B |
| 166 | Patient093D  | Patient099C |
| 166 | Patient093D  | Patient222A |
| 166 | Patient094B  | Patient099B |
| 166 | Patient094C  | Patient126D |
| 166 | Patient094C  | Patient201A |
| 166 | Patient094C  | Patient263B |
| 166 | Patient094D  | Patient222D |
| 166 | Patient097A  | Patient104A |
| 166 | Patient097D  | Patient099B |
| 166 | Patient099A  | Patient196F |
| 166 | Patient099B  | Patient184  |
| 166 | Patient099B  | Patient222B |
| 166 | Patient099D  | Patient159  |
| 166 | Patient099D  | Patient222C |
| 166 | Patient099E  | Patient126E |
| 166 | Patient099E  | Patient184  |
| 166 | Patient100A  | Patient196B |
| 166 | Patient100A  | Patient196F |
| 166 | Patient100A  | Patient222E |
| 166 | Patient104A  | Patient127A |
| 166 | Patient108A  | Patient222D |
| 166 | Patient108B1 | Patient222E |
| 166 | Patient108B2 | Patient218A |
| 166 | Patient109C  | Patient196E |
| 166 | Patient109D  | Patient196C |
| 166 | Patient109D  | Patient222E |
| 166 | Patient109E  | Patient218B |
| 166 | Patient127B  | Patient201E |
| 166 | Patient141A  | Patient230G |
| 166 | Patient141D  | Patient261E |
| 166 | Patient149A  | Patient187  |
| 166 | Patient149B  | Patient218B |
| 166 | Patient149B  | Patient252F |
| 166 | Patient196C  | Patient218A |
| 166 | Patient196E  | Patient218A |
| 166 | Patient196F  | Patient218B |
| 166 | Patient196F  | Patient220A |
| 166 | Patient196F  | Patient265  |
| 166 | Patient201A  | Patient252D |
| 166 | Patient218A  | Patient236A |

|     |              |             |
|-----|--------------|-------------|
| 166 | Patient218B  | Patient236B |
| 166 | Patient220A  | Patient222E |
| 166 | Patient222C  | Patient263A |
| 166 | Patient222D  | Patient252B |
| 166 | Patient222F  | Patient265  |
| 166 | Patient224B  | Patient230A |
| 166 | Patient224B  | Patient230F |
| 166 | Patient232E  | Patient252D |
| 166 | Patient252F  | Patient265  |
| 167 | Patient023   | Patient094B |
| 167 | Patient032A  | Patient141A |
| 167 | Patient032A  | Patient230C |
| 167 | Patient032B  | Patient141B |
| 167 | Patient032B  | Patient230G |
| 167 | Patient032C  | Patient141B |
| 167 | Patient032D  | Patient103C |
| 167 | Patient032E  | Patient074A |
| 167 | Patient032E  | Patient103C |
| 167 | Patient032E  | Patient230G |
| 167 | Patient034A  | Patient230G |
| 167 | Patient045D  | Patient222B |
| 167 | Patient045D  | Patient222E |
| 167 | Patient079A2 | Patient232C |
| 167 | Patient079B  | Patient099C |
| 167 | Patient079B  | Patient232D |
| 167 | Patient093A  | Patient196D |
| 167 | Patient093C  | Patient232B |
| 167 | Patient093D  | Patient222D |
| 167 | Patient093E  | Patient196D |
| 167 | Patient094B  | Patient099C |
| 167 | Patient094C  | Patient196E |
| 167 | Patient094C  | Patient201B |
| 167 | Patient094C  | Patient222B |
| 167 | Patient094D  | Patient099D |
| 167 | Patient094D  | Patient104B |
| 167 | Patient094D  | Patient222C |
| 167 | Patient094E  | Patient099B |
| 167 | Patient097A  | Patient099C |
| 167 | Patient097C  | Patient099B |
| 167 | Patient097D  | Patient099A |
| 167 | Patient099A  | Patient187  |
| 167 | Patient099A  | Patient222E |
| 167 | Patient099A  | Patient252B |
| 167 | Patient099B  | Patient222F |
| 167 | Patient099C  | Patient126E |
| 167 | Patient099E  | Patient127A |
| 167 | Patient099E  | Patient222A |
| 167 | Patient103B  | Patient141F |
| 167 | Patient103B  | Patient230G |
| 167 | Patient103C  | Patient224A |

|     |              |              |
|-----|--------------|--------------|
| 167 | Patient104A  | Patient109E  |
| 167 | Patient104B  | Patient108B2 |
| 167 | Patient104B  | Patient108F  |
| 167 | Patient104B  | Patient109D  |
| 167 | Patient104B  | Patient236B  |
| 167 | Patient104B  | Patient252D  |
| 167 | Patient108A  | Patient201A  |
| 167 | Patient108B1 | Patient196C  |
| 167 | Patient108B1 | Patient196E  |
| 167 | Patient108D  | Patient201A  |
| 167 | Patient108F  | Patient196E  |
| 167 | Patient108F  | Patient218A  |
| 167 | Patient126D  | Patient127A  |
| 167 | Patient141C  | Patient261C  |
| 167 | Patient141C  | Patient261E  |
| 167 | Patient149A  | Patient218A  |
| 167 | Patient149B  | Patient196C  |
| 167 | Patient149B  | Patient196E  |
| 167 | Patient187   | Patient263A  |
| 167 | Patient196A  | Patient263B  |
| 167 | Patient196E  | Patient236A  |
| 167 | Patient201B  | Patient252D  |
| 167 | Patient222A  | Patient263A  |
| 167 | Patient222B  | Patient263A  |
| 167 | Patient222E  | Patient265   |
| 168 | Patient028   | Patient097C  |
| 168 | Patient028   | Patient109A  |
| 168 | Patient032A  | Patient141G  |
| 168 | Patient032C  | Patient103C  |
| 168 | Patient032C  | Patient141D  |
| 168 | Patient032D  | Patient141F  |
| 168 | Patient032D  | Patient181A  |
| 168 | Patient034B  | Patient066F  |
| 168 | Patient034B  | Patient141C  |
| 168 | Patient034C  | Patient224A  |
| 168 | Patient034E  | Patient066F  |
| 168 | Patient034E  | Patient141C  |
| 168 | Patient045C  | Patient251   |
| 168 | Patient045D  | Patient196B  |
| 168 | Patient045D  | Patient218B  |
| 168 | Patient045D  | Patient236A  |
| 168 | Patient074B  | Patient141D  |
| 168 | Patient074B  | Patient230C  |
| 168 | Patient074B  | Patient261C  |
| 168 | Patient074C  | Patient141G  |
| 168 | Patient079B  | Patient232A  |
| 168 | Patient079B  | Patient232E  |
| 168 | Patient093A  | Patient104B  |
| 168 | Patient093B  | Patient232A  |
| 168 | Patient093B  | Patient232C  |

|     |              |             |
|-----|--------------|-------------|
| 168 | Patient093B  | Patient232E |
| 168 | Patient093C  | Patient263A |
| 168 | Patient093D  | Patient099D |
| 168 | Patient093D  | Patient104B |
| 168 | Patient094A  | Patient104A |
| 168 | Patient094A  | Patient232B |
| 168 | Patient094B  | Patient099D |
| 168 | Patient094B  | Patient196D |
| 168 | Patient094C  | Patient099B |
| 168 | Patient094C  | Patient099E |
| 168 | Patient094C  | Patient149A |
| 168 | Patient094E  | Patient099E |
| 168 | Patient097A  | Patient232B |
| 168 | Patient097C  | Patient099A |
| 168 | Patient099A  | Patient108D |
| 168 | Patient099A  | Patient109A |
| 168 | Patient099A  | Patient127B |
| 168 | Patient099A  | Patient222A |
| 168 | Patient099A  | Patient222B |
| 168 | Patient099B  | Patient127B |
| 168 | Patient099B  | Patient196A |
| 168 | Patient099B  | Patient196F |
| 168 | Patient099C  | Patient127A |
| 168 | Patient099C  | Patient184  |
| 168 | Patient099E  | Patient222F |
| 168 | Patient103A  | Patient141A |
| 168 | Patient104A  | Patient108F |
| 168 | Patient104A  | Patient108H |
| 168 | Patient108A  | Patient201E |
| 168 | Patient108B2 | Patient196E |
| 168 | Patient109A  | Patient201B |
| 168 | Patient109B  | Patient201B |
| 168 | Patient109C  | Patient157  |
| 168 | Patient109C  | Patient218B |
| 168 | Patient109D  | Patient196E |
| 168 | Patient109D  | Patient218B |
| 168 | Patient126D  | Patient187  |
| 168 | Patient127B  | Patient222D |
| 168 | Patient131   | Patient213B |
| 168 | Patient141A  | Patient230C |
| 168 | Patient141B  | Patient261C |
| 168 | Patient141B  | Patient261E |
| 168 | Patient141D  | Patient261C |
| 168 | Patient141G  | Patient230G |
| 168 | Patient159   | Patient201A |
| 168 | Patient159   | Patient201E |
| 168 | Patient196A  | Patient263A |
| 168 | Patient196B  | Patient263A |
| 168 | Patient196B  | Patient263B |
| 168 | Patient218B  | Patient220A |

|     |             |             |
|-----|-------------|-------------|
| 168 | Patient222A | Patient263B |
| 168 | Patient222B | Patient263B |
| 168 | Patient222D | Patient252A |
| 168 | Patient222D | Patient263A |
| 168 | Patient222D | Patient263B |
| 168 | Patient222F | Patient263A |
| 168 | Patient222F | Patient263B |
| 168 | Patient230D | Patient261D |
| 169 | Patient028  | Patient097B |
| 169 | Patient028  | Patient097D |
| 169 | Patient028  | Patient097E |
| 169 | Patient028  | Patient108G |
| 169 | Patient028  | Patient109B |
| 169 | Patient032A | Patient103C |
| 169 | Patient032B | Patient141D |
| 169 | Patient032C | Patient074B |
| 169 | Patient032D | Patient230A |
| 169 | Patient032E | Patient141G |
| 169 | Patient034A | Patient141D |
| 169 | Patient034B | Patient230G |
| 169 | Patient034C | Patient066E |
| 169 | Patient034D | Patient141C |
| 169 | Patient034D | Patient230G |
| 169 | Patient034E | Patient141B |
| 169 | Patient034E | Patient230G |
| 169 | Patient045D | Patient196A |
| 169 | Patient045D | Patient263A |
| 169 | Patient079B | Patient232C |
| 169 | Patient093E | Patient104A |
| 169 | Patient094C | Patient099C |
| 169 | Patient094D | Patient196D |
| 169 | Patient094E | Patient104B |
| 169 | Patient097A | Patient099D |
| 169 | Patient097D | Patient104B |
| 169 | Patient097D | Patient222D |
| 169 | Patient099A | Patient196A |
| 169 | Patient099A | Patient196B |
| 169 | Patient099A | Patient252A |
| 169 | Patient099B | Patient108D |
| 169 | Patient099B | Patient109A |
| 169 | Patient099B | Patient187  |
| 169 | Patient099B | Patient252B |
| 169 | Patient099D | Patient126E |
| 169 | Patient099E | Patient222B |
| 169 | Patient099E | Patient222E |
| 169 | Patient100A | Patient236B |
| 169 | Patient103A | Patient141F |
| 169 | Patient103A | Patient230G |
| 169 | Patient103C | Patient230C |
| 169 | Patient103C | Patient261C |



|     |              |              |
|-----|--------------|--------------|
| 169 | Patient103C  | Patient261E  |
| 169 | Patient104A  | Patient108B2 |
| 169 | Patient108B2 | Patient218B  |
| 169 | Patient108D  | Patient222D  |
| 169 | Patient108F  | Patient218B  |
| 169 | Patient109E  | Patient157   |
| 169 | Patient126D  | Patient196B  |
| 169 | Patient141D  | Patient230A  |
| 169 | Patient141G  | Patient181A  |
| 169 | Patient141G  | Patient230C  |
| 169 | Patient141G  | Patient230E  |
| 169 | Patient157   | Patient159   |
| 169 | Patient184   | Patient196D  |
| 169 | Patient184   | Patient222C  |
| 169 | Patient196C  | Patient218B  |
| 169 | Patient196D  | Patient222C  |
| 169 | Patient196E  | Patient218B  |
| 169 | Patient201B  | Patient236B  |
| 169 | Patient252F  | Patient263A  |
| 170 | Patient028   | Patient109E  |
| 170 | Patient028   | Patient159   |
| 170 | Patient032C  | Patient074A  |
| 170 | Patient032E  | Patient181A  |
| 170 | Patient032E  | Patient230C  |
| 170 | Patient032E  | Patient230F  |
| 170 | Patient034A  | Patient141A  |
| 170 | Patient034A  | Patient230C  |
| 170 | Patient034B  | Patient141B  |
| 170 | Patient034C  | Patient066F  |
| 170 | Patient045D  | Patient196C  |
| 170 | Patient066E  | Patient103A  |
| 170 | Patient066F  | Patient103A  |
| 170 | Patient074C  | Patient141F  |
| 170 | Patient079A1 | Patient246A  |
| 170 | Patient079C  | Patient246A  |
| 170 | Patient093A  | Patient104A  |
| 170 | Patient093C  | Patient232D  |
| 170 | Patient094C  | Patient201E  |
| 170 | Patient094C  | Patient222A  |
| 170 | Patient094D  | Patient104A  |
| 170 | Patient094D  | Patient196F  |
| 170 | Patient094E  | Patient099C  |
| 170 | Patient094E  | Patient222C  |
| 170 | Patient097A  | Patient196D  |
| 170 | Patient097A  | Patient232D  |
| 170 | Patient097B  | Patient099A  |
| 170 | Patient097B  | Patient099B  |
| 170 | Patient097D  | Patient099E  |
| 170 | Patient097E  | Patient099B  |
| 170 | Patient097E  | Patient104B  |

|     |              |              |
|-----|--------------|--------------|
| 170 | Patient099B  | Patient196B  |
| 170 | Patient099B  | Patient222E  |
| 170 | Patient099B  | Patient252A  |
| 170 | Patient099D  | Patient222F  |
| 170 | Patient099E  | Patient108A  |
| 170 | Patient099E  | Patient196F  |
| 170 | Patient099E  | Patient252B  |
| 170 | Patient100A  | Patient218A  |
| 170 | Patient103A  | Patient224A  |
| 170 | Patient104A  | Patient108B1 |
| 170 | Patient104A  | Patient109C  |
| 170 | Patient104B  | Patient127B  |
| 170 | Patient104B  | Patient149B  |
| 170 | Patient104B  | Patient159   |
| 170 | Patient108B1 | Patient157   |
| 170 | Patient108D  | Patient201E  |
| 170 | Patient126D  | Patient196A  |
| 170 | Patient127A  | Patient196D  |
| 170 | Patient184   | Patient232B  |
| 170 | Patient196D  | Patient222A  |
| 170 | Patient196D  | Patient222D  |
| 170 | Patient196E  | Patient220A  |
| 170 | Patient196F  | Patient263B  |
| 170 | Patient201E  | Patient252D  |
| 170 | Patient218A  | Patient265   |
| 170 | Patient218B  | Patient236A  |
| 170 | Patient222E  | Patient263B  |
| 170 | Patient252F  | Patient263B  |
| 171 | Patient023   | Patient094C  |
| 171 | Patient028   | Patient094E  |
| 171 | Patient032A  | Patient261C  |
| 171 | Patient032B  | Patient141A  |
| 171 | Patient032B  | Patient141G  |
| 171 | Patient032B  | Patient230C  |
| 171 | Patient032C  | Patient141A  |
| 171 | Patient032C  | Patient230G  |
| 171 | Patient032E  | Patient074C  |
| 171 | Patient032E  | Patient230E  |
| 171 | Patient034A  | Patient141G  |
| 171 | Patient034D  | Patient141B  |
| 171 | Patient034E  | Patient141D  |
| 171 | Patient045D  | Patient189E  |
| 171 | Patient045D  | Patient196E  |
| 171 | Patient074A  | Patient141D  |
| 171 | Patient074A  | Patient230C  |
| 171 | Patient074A  | Patient261E  |
| 171 | Patient079A2 | Patient246A  |
| 171 | Patient093C  | Patient232A  |
| 171 | Patient093C  | Patient232C  |
| 171 | Patient093C  | Patient232E  |

|     |             |             |
|-----|-------------|-------------|
| 171 | Patient093D | Patient196D |
| 171 | Patient094A | Patient232E |
| 171 | Patient094B | Patient104B |
| 171 | Patient094C | Patient222D |
| 171 | Patient094E | Patient222D |
| 171 | Patient097A | Patient157  |
| 171 | Patient097A | Patient232A |
| 171 | Patient097B | Patient104B |
| 171 | Patient097B | Patient222D |
| 171 | Patient097C | Patient099E |
| 171 | Patient097C | Patient104A |
| 171 | Patient097E | Patient099A |
| 171 | Patient099A | Patient196C |
| 171 | Patient099C | Patient108A |
| 171 | Patient099C | Patient222B |
| 171 | Patient099C | Patient222F |
| 171 | Patient099D | Patient127A |
| 171 | Patient099E | Patient108D |
| 171 | Patient099E | Patient127B |
| 171 | Patient099E | Patient187  |
| 171 | Patient100A | Patient196C |
| 171 | Patient100A | Patient196E |
| 171 | Patient104A | Patient109D |
| 171 | Patient108F | Patient157  |
| 171 | Patient108G | Patient201B |
| 171 | Patient109D | Patient157  |
| 171 | Patient126D | Patient127B |
| 171 | Patient141G | Patient230D |
| 171 | Patient141G | Patient230F |
| 171 | Patient149A | Patient218B |
| 171 | Patient157  | Patient187  |
| 171 | Patient184  | Patient232D |
| 171 | Patient196C | Patient220A |
| 171 | Patient196C | Patient265  |
| 171 | Patient196D | Patient222B |
| 171 | Patient196D | Patient222E |
| 171 | Patient196D | Patient222F |
| 171 | Patient196E | Patient265  |
| 171 | Patient196F | Patient263A |
| 171 | Patient201B | Patient236A |
| 171 | Patient218A | Patient263B |
| 171 | Patient222E | Patient263A |
| 172 | Patient028  | Patient094A |
| 172 | Patient028  | Patient109D |
| 172 | Patient032A | Patient141F |
| 172 | Patient032A | Patient261E |
| 172 | Patient032D | Patient261G |
| 172 | Patient034B | Patient141D |
| 172 | Patient034C | Patient141C |
| 172 | Patient034E | Patient230C |

|     |              |             |
|-----|--------------|-------------|
| 172 | Patient045D  | Patient093B |
| 172 | Patient074A  | Patient261C |
| 172 | Patient074D  | Patient230G |
| 172 | Patient093A  | Patient232B |
| 172 | Patient093D  | Patient104A |
| 172 | Patient093E  | Patient232B |
| 172 | Patient094A  | Patient222D |
| 172 | Patient094C  | Patient099D |
| 172 | Patient097A  | Patient232E |
| 172 | Patient097C  | Patient099C |
| 172 | Patient097D  | Patient099C |
| 172 | Patient099C  | Patient108D |
| 172 | Patient099C  | Patient196F |
| 172 | Patient099C  | Patient222A |
| 172 | Patient099C  | Patient252B |
| 172 | Patient099D  | Patient108A |
| 172 | Patient099D  | Patient127B |
| 172 | Patient100A  | Patient220A |
| 172 | Patient104A  | Patient159  |
| 172 | Patient104A  | Patient236B |
| 172 | Patient104A  | Patient252D |
| 172 | Patient104B  | Patient220A |
| 172 | Patient108B2 | Patient157  |
| 172 | Patient108H  | Patient201B |
| 172 | Patient109A  | Patient201A |
| 172 | Patient109A  | Patient201E |
| 172 | Patient109B  | Patient201E |
| 172 | Patient109B  | Patient222D |
| 172 | Patient126D  | Patient196C |
| 172 | Patient126E  | Patient196D |
| 172 | Patient127A  | Patient232B |
| 172 | Patient127B  | Patient196D |
| 172 | Patient141F  | Patient230G |
| 172 | Patient149A  | Patient222D |
| 172 | Patient150A  | Patient177  |
| 172 | Patient150B  | Patient177  |
| 172 | Patient184   | Patient232A |
| 172 | Patient218A  | Patient263A |
| 172 | Patient218B  | Patient265  |
| 172 | Patient224B  | Patient230E |
| 173 | Patient028   | Patient093E |
| 173 | Patient028   | Patient109C |
| 173 | Patient032B  | Patient103C |
| 173 | Patient032E  | Patient103B |
| 173 | Patient032E  | Patient230D |
| 173 | Patient034B  | Patient141A |
| 173 | Patient034B  | Patient230C |
| 173 | Patient034C  | Patient141B |
| 173 | Patient034D  | Patient141D |
| 173 | Patient034E  | Patient141A |

|     |              |             |
|-----|--------------|-------------|
| 173 | Patient034E  | Patient141G |
| 173 | Patient045D  | Patient099A |
| 173 | Patient045D  | Patient189B |
| 173 | Patient045D  | Patient220A |
| 173 | Patient093B  | Patient246A |
| 173 | Patient094A  | Patient222C |
| 173 | Patient094A  | Patient232A |
| 173 | Patient094A  | Patient232C |
| 173 | Patient094C  | Patient104B |
| 173 | Patient094D  | Patient232B |
| 173 | Patient094E  | Patient099D |
| 173 | Patient094E  | Patient196D |
| 173 | Patient097B  | Patient099E |
| 173 | Patient097D  | Patient099D |
| 173 | Patient097E  | Patient099E |
| 173 | Patient097E  | Patient232B |
| 173 | Patient099A  | Patient196E |
| 173 | Patient099A  | Patient236B |
| 173 | Patient099B  | Patient109B |
| 173 | Patient099B  | Patient236B |
| 173 | Patient099C  | Patient127B |
| 173 | Patient099C  | Patient187  |
| 173 | Patient099C  | Patient222E |
| 173 | Patient099D  | Patient184  |
| 173 | Patient099D  | Patient196F |
| 173 | Patient099D  | Patient222A |
| 173 | Patient099D  | Patient222B |
| 173 | Patient099D  | Patient222E |
| 173 | Patient099E  | Patient252A |
| 173 | Patient103B  | Patient224A |
| 173 | Patient104A  | Patient127B |
| 173 | Patient104B  | Patient236A |
| 173 | Patient108A  | Patient196D |
| 173 | Patient108B1 | Patient232A |
| 173 | Patient108B1 | Patient232B |
| 173 | Patient108B2 | Patient232B |
| 173 | Patient108B2 | Patient232D |
| 173 | Patient109A  | Patient222D |
| 173 | Patient109B  | Patient201A |
| 173 | Patient109E  | Patient201B |
| 173 | Patient126E  | Patient131  |
| 173 | Patient127A  | Patient232D |
| 173 | Patient127A  | Patient232E |
| 173 | Patient141A  | Patient261C |
| 173 | Patient141A  | Patient261E |
| 173 | Patient141C  | Patient224B |
| 173 | Patient141D  | Patient230E |
| 173 | Patient184   | Patient232E |
| 173 | Patient187   | Patient232A |
| 173 | Patient187   | Patient232B |

|     |             |             |
|-----|-------------|-------------|
| 173 | Patient196C | Patient263B |
| 173 | Patient196E | Patient263B |
| 173 | Patient201E | Patient236B |
| 173 | Patient222D | Patient252F |
| 173 | Patient224B | Patient230B |
| 174 | Patient028  | Patient093A |
| 174 | Patient028  | Patient108F |
| 174 | Patient032A | Patient181A |
| 174 | Patient032C | Patient074C |
| 174 | Patient032C | Patient141G |
| 174 | Patient032D | Patient074B |
| 174 | Patient032D | Patient230E |
| 174 | Patient032E | Patient141F |
| 174 | Patient032E | Patient230A |
| 174 | Patient032E | Patient261B |
| 174 | Patient032E | Patient261C |
| 174 | Patient032E | Patient261E |
| 174 | Patient034A | Patient103C |
| 174 | Patient034A | Patient261C |
| 174 | Patient034A | Patient261E |
| 174 | Patient034B | Patient141G |
| 174 | Patient034C | Patient230G |
| 174 | Patient034D | Patient230C |
| 174 | Patient045D | Patient189A |
| 174 | Patient074C | Patient230C |
| 174 | Patient074C | Patient261E |
| 174 | Patient074D | Patient141G |
| 174 | Patient093D | Patient232B |
| 174 | Patient093E | Patient222C |
| 174 | Patient093E | Patient232A |
| 174 | Patient093E | Patient232E |
| 174 | Patient094A | Patient232D |
| 174 | Patient094B | Patient232B |
| 174 | Patient094E | Patient104A |
| 174 | Patient097A | Patient232C |
| 174 | Patient097C | Patient157  |
| 174 | Patient097C | Patient232B |
| 174 | Patient097D | Patient104A |
| 174 | Patient097E | Patient157  |
| 174 | Patient099A | Patient108G |
| 174 | Patient099A | Patient108H |
| 174 | Patient099A | Patient109B |
| 174 | Patient099A | Patient252F |
| 174 | Patient099B | Patient108G |
| 174 | Patient099B | Patient218A |
| 174 | Patient099C | Patient196A |
| 174 | Patient099C | Patient252A |
| 174 | Patient099D | Patient187  |
| 174 | Patient099D | Patient252A |
| 174 | Patient099E | Patient196A |

|     |              |             |
|-----|--------------|-------------|
| 174 | Patient099E  | Patient196B |
| 174 | Patient100A  | Patient218B |
| 174 | Patient100A  | Patient236A |
| 174 | Patient103B  | Patient230C |
| 174 | Patient104A  | Patient220A |
| 174 | Patient104B  | Patient149A |
| 174 | Patient108A  | Patient232B |
| 174 | Patient108A  | Patient232E |
| 174 | Patient108A  | Patient246A |
| 174 | Patient108B1 | Patient201B |
| 174 | Patient108B1 | Patient232D |
| 174 | Patient108B1 | Patient232E |
| 174 | Patient108B1 | Patient263A |
| 174 | Patient108B2 | Patient201B |
| 174 | Patient108D  | Patient196D |
| 174 | Patient108G  | Patient201A |
| 174 | Patient109C  | Patient201B |
| 174 | Patient126D  | Patient196E |
| 174 | Patient126D  | Patient236B |
| 174 | Patient127A  | Patient232A |
| 174 | Patient141B  | Patient224B |
| 174 | Patient141D  | Patient230B |
| 174 | Patient141F  | Patient181A |
| 174 | Patient141G  | Patient230A |
| 174 | Patient141G  | Patient261B |
| 174 | Patient141G  | Patient261C |
| 174 | Patient141G  | Patient261E |
| 174 | Patient149A  | Patient201B |
| 174 | Patient187   | Patient232D |
| 174 | Patient187   | Patient232E |
| 174 | Patient196E  | Patient263A |
| 174 | Patient201A  | Patient236B |
| 174 | Patient201B  | Patient220A |
| 174 | Patient232B  | Patient252B |
| 175 | Patient028   | Patient093D |
| 175 | Patient028   | Patient094B |
| 175 | Patient028   | Patient108H |
| 175 | Patient032A  | Patient230A |
| 175 | Patient032B  | Patient141F |
| 175 | Patient032B  | Patient261C |
| 175 | Patient032B  | Patient261E |
| 175 | Patient032C  | Patient181A |
| 175 | Patient032C  | Patient230C |
| 175 | Patient032C  | Patient230E |
| 175 | Patient032D  | Patient230F |
| 175 | Patient032E  | Patient103A |
| 175 | Patient034A  | Patient141F |
| 175 | Patient034C  | Patient141D |
| 175 | Patient034D  | Patient141A |
| 175 | Patient034D  | Patient141G |

|     |              |              |
|-----|--------------|--------------|
| 175 | Patient034E  | Patient103C  |
| 175 | Patient045D  | Patient093C  |
| 175 | Patient045D  | Patient149B  |
| 175 | Patient074C  | Patient141D  |
| 175 | Patient079C  | Patient246C  |
| 175 | Patient093E  | Patient232C  |
| 175 | Patient093E  | Patient232D  |
| 175 | Patient094A  | Patient196F  |
| 175 | Patient094B  | Patient104A  |
| 175 | Patient094C  | Patient104A  |
| 175 | Patient094C  | Patient196D  |
| 175 | Patient094D  | Patient232D  |
| 175 | Patient094E  | Patient196F  |
| 175 | Patient097B  | Patient104A  |
| 175 | Patient097C  | Patient099D  |
| 175 | Patient097C  | Patient196D  |
| 175 | Patient097D  | Patient196D  |
| 175 | Patient097E  | Patient099C  |
| 175 | Patient097E  | Patient099D  |
| 175 | Patient097E  | Patient104A  |
| 175 | Patient099A  | Patient108B1 |
| 175 | Patient099A  | Patient220A  |
| 175 | Patient099A  | Patient236A  |
| 175 | Patient099B  | Patient108H  |
| 175 | Patient099B  | Patient196C  |
| 175 | Patient099B  | Patient196E  |
| 175 | Patient099B  | Patient220A  |
| 175 | Patient099C  | Patient109A  |
| 175 | Patient099D  | Patient108D  |
| 175 | Patient099D  | Patient252B  |
| 175 | Patient099E  | Patient109A  |
| 175 | Patient100A  | Patient149B  |
| 175 | Patient103B  | Patient261E  |
| 175 | Patient108A  | Patient232A  |
| 175 | Patient108B2 | Patient232A  |
| 175 | Patient108B2 | Patient263A  |
| 175 | Patient108G  | Patient201E  |
| 175 | Patient108G  | Patient222D  |
| 175 | Patient126E  | Patient196F  |
| 175 | Patient126E  | Patient201B  |
| 175 | Patient126E  | Patient232A  |
| 175 | Patient126E  | Patient232B  |
| 175 | Patient141D  | Patient181B  |
| 175 | Patient141D  | Patient230F  |
| 175 | Patient141F  | Patient230C  |
| 175 | Patient141F  | Patient230E  |
| 175 | Patient157   | Patient252B  |
| 175 | Patient184   | Patient196F  |
| 175 | Patient184   | Patient232C  |
| 175 | Patient187   | Patient196D  |



|     |              |              |
|-----|--------------|--------------|
| 175 | Patient187   | Patient201B  |
| 175 | Patient201B  | Patient222C  |
| 175 | Patient201B  | Patient265   |
| 175 | Patient218B  | Patient263A  |
| 175 | Patient218B  | Patient263B  |
| 175 | Patient246A  | Patient252A  |
| 175 | Patient246A  | Patient252B  |
| 176 | Patient032A  | Patient074B  |
| 176 | Patient032D  | Patient074A  |
| 176 | Patient032D  | Patient230B  |
| 176 | Patient034D  | Patient103C  |
| 176 | Patient034E  | Patient261C  |
| 176 | Patient034E  | Patient261E  |
| 176 | Patient045D  | Patient094A  |
| 176 | Patient045D  | Patient099B  |
| 176 | Patient074C  | Patient261C  |
| 176 | Patient079B  | Patient246A  |
| 176 | Patient093A  | Patient222C  |
| 176 | Patient093A  | Patient232A  |
| 176 | Patient093A  | Patient232E  |
| 176 | Patient093C  | Patient246A  |
| 176 | Patient094B  | Patient222C  |
| 176 | Patient094D  | Patient232A  |
| 176 | Patient094D  | Patient232E  |
| 176 | Patient094D  | Patient263A  |
| 176 | Patient094E  | Patient232B  |
| 176 | Patient097C  | Patient232A  |
| 176 | Patient097C  | Patient232D  |
| 176 | Patient097C  | Patient232E  |
| 176 | Patient097D  | Patient232B  |
| 176 | Patient097E  | Patient196D  |
| 176 | Patient097E  | Patient232A  |
| 176 | Patient097E  | Patient232C  |
| 176 | Patient097E  | Patient232D  |
| 176 | Patient099A  | Patient218A  |
| 176 | Patient099B  | Patient108B1 |
| 176 | Patient099B  | Patient252F  |
| 176 | Patient099C  | Patient196B  |
| 176 | Patient099D  | Patient196A  |
| 176 | Patient099E  | Patient196C  |
| 176 | Patient103B  | Patient261C  |
| 176 | Patient103C  | Patient261G  |
| 176 | Patient108A  | Patient232D  |
| 176 | Patient108B1 | Patient222C  |
| 176 | Patient108B1 | Patient232C  |
| 176 | Patient108B2 | Patient232C  |
| 176 | Patient108B2 | Patient232E  |
| 176 | Patient108F  | Patient201B  |
| 176 | Patient108H  | Patient201E  |
| 176 | Patient109E  | Patient201A  |

|     |              |              |
|-----|--------------|--------------|
| 176 | Patient126E  | Patient232D  |
| 176 | Patient126E  | Patient232E  |
| 176 | Patient127B  | Patient232B  |
| 176 | Patient131   | Patient184   |
| 176 | Patient149A  | Patient201A  |
| 176 | Patient187   | Patient232C  |
| 176 | Patient196C  | Patient263A  |
| 176 | Patient201A  | Patient236A  |
| 176 | Patient218A  | Patient222D  |
| 176 | Patient232B  | Patient252A  |
| 177 | Patient032A  | Patient103B  |
| 177 | Patient032C  | Patient230F  |
| 177 | Patient032D  | Patient103A  |
| 177 | Patient032D  | Patient103B  |
| 177 | Patient032D  | Patient181B  |
| 177 | Patient032E  | Patient261A  |
| 177 | Patient034A  | Patient181A  |
| 177 | Patient034B  | Patient103C  |
| 177 | Patient034B  | Patient261C  |
| 177 | Patient034B  | Patient261E  |
| 177 | Patient034C  | Patient141A  |
| 177 | Patient034D  | Patient261C  |
| 177 | Patient034E  | Patient141F  |
| 177 | Patient045D  | Patient093D  |
| 177 | Patient066D  | Patient224B  |
| 177 | Patient074D  | Patient141F  |
| 177 | Patient074E  | Patient230G  |
| 177 | Patient079A1 | Patient246C  |
| 177 | Patient093A  | Patient232C  |
| 177 | Patient093A  | Patient232D  |
| 177 | Patient094B  | Patient232C  |
| 177 | Patient094E  | Patient263A  |
| 177 | Patient097B  | Patient099C  |
| 177 | Patient097D  | Patient232A  |
| 177 | Patient097D  | Patient232E  |
| 177 | Patient097E  | Patient232E  |
| 177 | Patient099A  | Patient108B2 |
| 177 | Patient099A  | Patient108F  |
| 177 | Patient099B  | Patient236A  |
| 177 | Patient099D  | Patient109A  |
| 177 | Patient099D  | Patient196B  |
| 177 | Patient099E  | Patient109B  |
| 177 | Patient099E  | Patient236B  |
| 177 | Patient099E  | Patient252F  |
| 177 | Patient100A  | Patient263A  |
| 177 | Patient104A  | Patient149B  |
| 177 | Patient104A  | Patient236A  |
| 177 | Patient104B  | Patient126E  |
| 177 | Patient108B1 | Patient201A  |
| 177 | Patient108B2 | Patient201A  |

|     |              |             |
|-----|--------------|-------------|
| 177 | Patient108B2 | Patient222C |
| 177 | Patient108H  | Patient201A |
| 177 | Patient108H  | Patient222D |
| 177 | Patient109A  | Patient196D |
| 177 | Patient109D  | Patient201B |
| 177 | Patient127A  | Patient232C |
| 177 | Patient141A  | Patient224B |
| 177 | Patient141F  | Patient230D |
| 177 | Patient141F  | Patient230F |
| 177 | Patient141G  | Patient261A |
| 177 | Patient149B  | Patient201B |
| 177 | Patient150C  | Patient177  |
| 177 | Patient157   | Patient252A |
| 177 | Patient187   | Patient201A |
| 177 | Patient196A  | Patient232A |
| 177 | Patient196A  | Patient232B |
| 177 | Patient196A  | Patient232E |
| 177 | Patient196B  | Patient232B |
| 177 | Patient196D  | Patient252A |
| 177 | Patient201A  | Patient220A |
| 177 | Patient201B  | Patient263A |
| 178 | Patient032A  | Patient103A |
| 178 | Patient032A  | Patient230F |
| 178 | Patient032B  | Patient181A |
| 178 | Patient032C  | Patient103A |
| 178 | Patient032C  | Patient103B |
| 178 | Patient032C  | Patient141F |
| 178 | Patient032C  | Patient230D |
| 178 | Patient032C  | Patient261C |
| 178 | Patient032E  | Patient074D |
| 178 | Patient034A  | Patient230A |
| 178 | Patient034B  | Patient141F |
| 178 | Patient034C  | Patient141G |
| 178 | Patient034C  | Patient230C |
| 178 | Patient034D  | Patient141F |
| 178 | Patient034D  | Patient261E |
| 178 | Patient045D  | Patient093A |
| 178 | Patient074A  | Patient103A |
| 178 | Patient074B  | Patient103A |
| 178 | Patient074B  | Patient261G |
| 178 | Patient079A2 | Patient246C |
| 178 | Patient093A  | Patient196F |
| 178 | Patient093B  | Patient246C |
| 178 | Patient093D  | Patient222C |
| 178 | Patient093D  | Patient232C |
| 178 | Patient094B  | Patient232D |
| 178 | Patient094C  | Patient232B |
| 178 | Patient094E  | Patient232A |
| 178 | Patient097B  | Patient099D |
| 178 | Patient097B  | Patient232A |

|     |              |              |
|-----|--------------|--------------|
| 178 | Patient097B  | Patient232B  |
| 178 | Patient097C  | Patient232C  |
| 178 | Patient097D  | Patient232D  |
| 178 | Patient099A  | Patient109C  |
| 178 | Patient099A  | Patient109E  |
| 178 | Patient099A  | Patient218B  |
| 178 | Patient099B  | Patient108B2 |
| 178 | Patient099B  | Patient218B  |
| 178 | Patient099D  | Patient109B  |
| 178 | Patient099D  | Patient236B  |
| 178 | Patient099E  | Patient108G  |
| 178 | Patient103A  | Patient230C  |
| 178 | Patient103A  | Patient261C  |
| 178 | Patient103A  | Patient261E  |
| 178 | Patient104B  | Patient196A  |
| 178 | Patient104B  | Patient196B  |
| 178 | Patient104B  | Patient222A  |
| 178 | Patient108A  | Patient232C  |
| 178 | Patient108B1 | Patient201E  |
| 178 | Patient108D  | Patient232B  |
| 178 | Patient108D  | Patient232D  |
| 178 | Patient109A  | Patient246A  |
| 178 | Patient109B  | Patient196D  |
| 178 | Patient109C  | Patient222D  |
| 178 | Patient109E  | Patient222D  |
| 178 | Patient126D  | Patient218A  |
| 178 | Patient126E  | Patient201A  |
| 178 | Patient126E  | Patient232C  |
| 178 | Patient127A  | Patient131   |
| 178 | Patient127B  | Patient232D  |
| 178 | Patient127B  | Patient232E  |
| 178 | Patient131   | Patient252D  |
| 178 | Patient141C  | Patient261G  |
| 178 | Patient149A  | Patient201E  |
| 178 | Patient149B  | Patient201A  |
| 178 | Patient181A  | Patient230F  |
| 178 | Patient196A  | Patient232D  |
| 178 | Patient196B  | Patient232A  |
| 178 | Patient196B  | Patient232E  |
| 178 | Patient201A  | Patient222C  |
| 178 | Patient201B  | Patient222D  |
| 178 | Patient201E  | Patient222C  |
| 178 | Patient201E  | Patient236A  |
| 178 | Patient222A  | Patient232B  |
| 178 | Patient232A  | Patient252B  |
| 178 | Patient232C  | Patient252B  |
| 178 | Patient246A  | Patient252F  |
| 178 | Patient246C  | Patient252B  |
| 179 | Patient028   | Patient187   |
| 179 | Patient032A  | Patient074A  |

|     |              |              |
|-----|--------------|--------------|
| 179 | Patient032A  | Patient230E  |
| 179 | Patient032B  | Patient230A  |
| 179 | Patient032C  | Patient230A  |
| 179 | Patient032C  | Patient261B  |
| 179 | Patient032C  | Patient261E  |
| 179 | Patient032E  | Patient181B  |
| 179 | Patient045D  | Patient093E  |
| 179 | Patient045D  | Patient099E  |
| 179 | Patient045D  | Patient265   |
| 179 | Patient074E  | Patient141G  |
| 179 | Patient093D  | Patient232A  |
| 179 | Patient093E  | Patient196F  |
| 179 | Patient094A  | Patient246A  |
| 179 | Patient094A  | Patient263A  |
| 179 | Patient094D  | Patient232C  |
| 179 | Patient097B  | Patient196D  |
| 179 | Patient097B  | Patient232E  |
| 179 | Patient099A  | Patient149B  |
| 179 | Patient099A  | Patient263A  |
| 179 | Patient099B  | Patient263A  |
| 179 | Patient099C  | Patient108G  |
| 179 | Patient099C  | Patient109B  |
| 179 | Patient099C  | Patient196C  |
| 179 | Patient099C  | Patient236B  |
| 179 | Patient099C  | Patient252F  |
| 179 | Patient099E  | Patient108B2 |
| 179 | Patient099E  | Patient108H  |
| 179 | Patient099E  | Patient196E  |
| 179 | Patient099E  | Patient218A  |
| 179 | Patient100A  | Patient263B  |
| 179 | Patient100A  | Patient265   |
| 179 | Patient104A  | Patient149A  |
| 179 | Patient104B  | Patient187   |
| 179 | Patient104B  | Patient222C  |
| 179 | Patient104B  | Patient252B  |
| 179 | Patient108B2 | Patient222D  |
| 179 | Patient108D  | Patient232A  |
| 179 | Patient108D  | Patient246A  |
| 179 | Patient108F  | Patient201A  |
| 179 | Patient109C  | Patient201A  |
| 179 | Patient109C  | Patient201E  |
| 179 | Patient109E  | Patient201E  |
| 179 | Patient126D  | Patient232B  |
| 179 | Patient126D  | Patient236A  |
| 179 | Patient126E  | Patient201E  |
| 179 | Patient127B  | Patient232A  |
| 179 | Patient141B  | Patient261G  |
| 179 | Patient141D  | Patient261G  |
| 179 | Patient141F  | Patient230A  |
| 179 | Patient141F  | Patient261B  |

|     |             |              |
|-----|-------------|--------------|
| 179 | Patient141F | Patient261C  |
| 179 | Patient141F | Patient261E  |
| 179 | Patient141G | Patient181B  |
| 179 | Patient141G | Patient230B  |
| 179 | Patient149B | Patient201E  |
| 179 | Patient157  | Patient252F  |
| 179 | Patient196A | Patient201B  |
| 179 | Patient196D | Patient236B  |
| 179 | Patient196D | Patient252B  |
| 179 | Patient201B | Patient222B  |
| 179 | Patient201B | Patient222E  |
| 179 | Patient201B | Patient263B  |
| 179 | Patient201E | Patient220A  |
| 179 | Patient201E | Patient265   |
| 179 | Patient218B | Patient222D  |
| 179 | Patient222A | Patient232A  |
| 179 | Patient222E | Patient232B  |
| 179 | Patient232A | Patient252A  |
| 179 | Patient232B | Patient236B  |
| 179 | Patient232C | Patient252A  |
| 179 | Patient232D | Patient252B  |
| 179 | Patient232E | Patient252A  |
| 179 | Patient232E | Patient252B  |
| 180 | Patient028  | Patient094C  |
| 180 | Patient028  | Patient222A  |
| 180 | Patient028  | Patient222C  |
| 180 | Patient032A | Patient261G  |
| 180 | Patient032B | Patient074B  |
| 180 | Patient032C | Patient261A  |
| 180 | Patient032E | Patient074E  |
| 180 | Patient034C | Patient103C  |
| 180 | Patient034E | Patient181A  |
| 180 | Patient079B | Patient246C  |
| 180 | Patient093D | Patient196F  |
| 180 | Patient093D | Patient232D  |
| 180 | Patient094B | Patient232A  |
| 180 | Patient094E | Patient232D  |
| 180 | Patient094E | Patient232E  |
| 180 | Patient097B | Patient232D  |
| 180 | Patient097D | Patient232C  |
| 180 | Patient099B | Patient109C  |
| 180 | Patient099B | Patient149A  |
| 180 | Patient099B | Patient149B  |
| 180 | Patient099C | Patient218A  |
| 180 | Patient099D | Patient108H  |
| 180 | Patient099D | Patient196C  |
| 180 | Patient099D | Patient236A  |
| 180 | Patient099E | Patient108B1 |
| 180 | Patient099E | Patient220A  |
| 180 | Patient099E | Patient236A  |

|     |              |             |
|-----|--------------|-------------|
| 180 | Patient104B  | Patient263A |
| 180 | Patient104B  | Patient263B |
| 180 | Patient104B  | Patient265  |
| 180 | Patient108B1 | Patient222D |
| 180 | Patient108B2 | Patient201E |
| 180 | Patient108D  | Patient232E |
| 180 | Patient108F  | Patient222D |
| 180 | Patient109A  | Patient232B |
| 180 | Patient109A  | Patient232E |
| 180 | Patient109B  | Patient246A |
| 180 | Patient109D  | Patient201A |
| 180 | Patient109D  | Patient222D |
| 180 | Patient126D  | Patient149B |
| 180 | Patient126D  | Patient218B |
| 180 | Patient126D  | Patient232D |
| 180 | Patient127B  | Patient232C |
| 180 | Patient131   | Patient236B |
| 180 | Patient181A  | Patient230A |
| 180 | Patient187   | Patient201E |
| 180 | Patient196A  | Patient232C |
| 180 | Patient196B  | Patient201B |
| 180 | Patient196B  | Patient232D |
| 180 | Patient196C  | Patient232B |
| 180 | Patient196F  | Patient201B |
| 180 | Patient201A  | Patient252B |
| 180 | Patient201A  | Patient265  |
| 180 | Patient201B  | Patient222F |
| 180 | Patient201B  | Patient252B |
| 180 | Patient201E  | Patient263A |
| 180 | Patient222A  | Patient232E |
| 180 | Patient222B  | Patient232B |
| 180 | Patient222F  | Patient232B |
| 180 | Patient222F  | Patient232D |
| 180 | Patient232B  | Patient252F |
| 180 | Patient246C  | Patient252A |
| 181 | Patient028   | Patient196A |
| 181 | Patient028   | Patient222B |
| 181 | Patient028   | Patient252A |
| 181 | Patient032B  | Patient103B |
| 181 | Patient032D  | Patient074C |
| 181 | Patient032E  | Patient230B |
| 181 | Patient034A  | Patient074B |
| 181 | Patient034B  | Patient181A |
| 181 | Patient034C  | Patient261C |
| 181 | Patient034C  | Patient261E |
| 181 | Patient034E  | Patient230A |
| 181 | Patient045D  | Patient094D |
| 181 | Patient045D  | Patient099C |
| 181 | Patient045D  | Patient099D |
| 181 | Patient045D  | Patient263B |

|     |              |              |
|-----|--------------|--------------|
| 181 | Patient074D  | Patient141D  |
| 181 | Patient074D  | Patient230C  |
| 181 | Patient074D  | Patient261E  |
| 181 | Patient079A1 | Patient246B  |
| 181 | Patient093C  | Patient246C  |
| 181 | Patient093D  | Patient232E  |
| 181 | Patient094B  | Patient232E  |
| 181 | Patient094E  | Patient232C  |
| 181 | Patient097B  | Patient232C  |
| 181 | Patient099A  | Patient126D  |
| 181 | Patient099B  | Patient108F  |
| 181 | Patient099B  | Patient109D  |
| 181 | Patient099B  | Patient109E  |
| 181 | Patient099C  | Patient108B2 |
| 181 | Patient099C  | Patient108H  |
| 181 | Patient099C  | Patient196E  |
| 181 | Patient099C  | Patient220A  |
| 181 | Patient099C  | Patient236A  |
| 181 | Patient099D  | Patient108G  |
| 181 | Patient099D  | Patient218A  |
| 181 | Patient099D  | Patient252F  |
| 181 | Patient099E  | Patient108F  |
| 181 | Patient099E  | Patient149B  |
| 181 | Patient100A  | Patient222D  |
| 181 | Patient104A  | Patient126E  |
| 181 | Patient104A  | Patient222A  |
| 181 | Patient104B  | Patient222B  |
| 181 | Patient108A  | Patient246C  |
| 181 | Patient108B1 | Patient196F  |
| 181 | Patient108B2 | Patient196F  |
| 181 | Patient108H  | Patient196D  |
| 181 | Patient109A  | Patient232A  |
| 181 | Patient109B  | Patient232B  |
| 181 | Patient109D  | Patient201E  |
| 181 | Patient126D  | Patient220A  |
| 181 | Patient126D  | Patient232A  |
| 181 | Patient126D  | Patient265   |
| 181 | Patient141F  | Patient261A  |
| 181 | Patient157   | Patient218A  |
| 181 | Patient181A  | Patient230E  |
| 181 | Patient184   | Patient246A  |
| 181 | Patient196B  | Patient232C  |
| 181 | Patient201A  | Patient222A  |
| 181 | Patient201B  | Patient222A  |
| 181 | Patient201B  | Patient252A  |
| 181 | Patient218A  | Patient232B  |
| 181 | Patient218A  | Patient232E  |
| 181 | Patient220A  | Patient222D  |
| 181 | Patient222A  | Patient232D  |
| 181 | Patient222F  | Patient232E  |



|     |              |              |
|-----|--------------|--------------|
| 181 | Patient224B  | Patient230D  |
| 181 | Patient232E  | Patient236B  |
| 182 | Patient028   | Patient126E  |
| 182 | Patient028   | Patient196B  |
| 182 | Patient028   | Patient222D  |
| 182 | Patient028   | Patient222F  |
| 182 | Patient028   | Patient252B  |
| 182 | Patient032A  | Patient230B  |
| 182 | Patient032B  | Patient230E  |
| 182 | Patient032B  | Patient230F  |
| 182 | Patient032C  | Patient181B  |
| 182 | Patient034B  | Patient230A  |
| 182 | Patient034C  | Patient141F  |
| 182 | Patient034D  | Patient181A  |
| 182 | Patient045D  | Patient222D  |
| 182 | Patient066D  | Patient145B  |
| 182 | Patient074C  | Patient103A  |
| 182 | Patient074E  | Patient141F  |
| 182 | Patient079A2 | Patient246B  |
| 182 | Patient093E  | Patient263A  |
| 182 | Patient094B  | Patient196F  |
| 182 | Patient094C  | Patient232C  |
| 182 | Patient094C  | Patient232D  |
| 182 | Patient099A  | Patient109D  |
| 182 | Patient099A  | Patient222D  |
| 182 | Patient099A  | Patient263B  |
| 182 | Patient099A  | Patient265   |
| 182 | Patient099B  | Patient263B  |
| 182 | Patient099B  | Patient265   |
| 182 | Patient099C  | Patient108B1 |
| 182 | Patient099D  | Patient196E  |
| 182 | Patient099D  | Patient220A  |
| 182 | Patient099E  | Patient109E  |
| 182 | Patient099E  | Patient218B  |
| 182 | Patient099E  | Patient222D  |
| 182 | Patient104A  | Patient187   |
| 182 | Patient104A  | Patient196A  |
| 182 | Patient104B  | Patient196F  |
| 182 | Patient108D  | Patient232C  |
| 182 | Patient108G  | Patient196D  |
| 182 | Patient108G  | Patient246A  |
| 182 | Patient109A  | Patient232D  |
| 182 | Patient109B  | Patient232A  |
| 182 | Patient109C  | Patient196D  |
| 182 | Patient109E  | Patient196D  |
| 182 | Patient126D  | Patient232E  |
| 182 | Patient131   | Patient159   |
| 182 | Patient196A  | Patient201A  |
| 182 | Patient196A  | Patient201E  |
| 182 | Patient196B  | Patient201A  |

|     |             |              |
|-----|-------------|--------------|
| 182 | Patient196C | Patient232D  |
| 182 | Patient196D | Patient236A  |
| 182 | Patient196E | Patient232B  |
| 182 | Patient196F | Patient201A  |
| 182 | Patient201A | Patient222B  |
| 182 | Patient201A | Patient222D  |
| 182 | Patient201A | Patient222F  |
| 182 | Patient201A | Patient263A  |
| 182 | Patient201E | Patient222D  |
| 182 | Patient201E | Patient252A  |
| 182 | Patient201E | Patient263B  |
| 182 | Patient218A | Patient232A  |
| 182 | Patient222A | Patient232C  |
| 182 | Patient222B | Patient232A  |
| 182 | Patient222B | Patient232D  |
| 182 | Patient222B | Patient232E  |
| 182 | Patient222E | Patient232D  |
| 182 | Patient222F | Patient232A  |
| 182 | Patient232A | Patient236B  |
| 182 | Patient232D | Patient252A  |
| 182 | Patient246C | Patient252F  |
| 183 | Patient005  | Patient056   |
| 183 | Patient028  | Patient045D  |
| 183 | Patient028  | Patient222E  |
| 183 | Patient032A | Patient074C  |
| 183 | Patient032A | Patient181B  |
| 183 | Patient032B | Patient074A  |
| 183 | Patient032B | Patient103A  |
| 183 | Patient032C | Patient074D  |
| 183 | Patient032D | Patient145B  |
| 183 | Patient032E | Patient261D  |
| 183 | Patient032E | Patient261G  |
| 183 | Patient034A | Patient230E  |
| 183 | Patient034A | Patient230F  |
| 183 | Patient034A | Patient261G  |
| 183 | Patient034B | Patient074B  |
| 183 | Patient034D | Patient230A  |
| 183 | Patient045D | Patient094E  |
| 183 | Patient066E | Patient224B  |
| 183 | Patient066F | Patient224B  |
| 183 | Patient074A | Patient261G  |
| 183 | Patient074D | Patient261C  |
| 183 | Patient079C | Patient246B  |
| 183 | Patient093A | Patient263A  |
| 183 | Patient093D | Patient263A  |
| 183 | Patient094C | Patient232E  |
| 183 | Patient099A | Patient149A  |
| 183 | Patient099B | Patient126D  |
| 183 | Patient099C | Patient218B  |
| 183 | Patient099D | Patient108B1 |

|     |              |             |
|-----|--------------|-------------|
| 183 | Patient099E  | Patient109C |
| 183 | Patient099E  | Patient149A |
| 183 | Patient104B  | Patient222F |
| 183 | Patient108F  | Patient201E |
| 183 | Patient108H  | Patient246A |
| 183 | Patient109B  | Patient232C |
| 183 | Patient109B  | Patient232E |
| 183 | Patient127A  | Patient246A |
| 183 | Patient141G  | Patient261D |
| 183 | Patient145B  | Patient224B |
| 183 | Patient157   | Patient218B |
| 183 | Patient181A  | Patient230B |
| 183 | Patient196B  | Patient201E |
| 183 | Patient196C  | Patient201B |
| 183 | Patient196C  | Patient232A |
| 183 | Patient196D  | Patient218A |
| 183 | Patient196D  | Patient252F |
| 183 | Patient196E  | Patient232A |
| 183 | Patient201A  | Patient252A |
| 183 | Patient201A  | Patient263B |
| 183 | Patient201B  | Patient218A |
| 183 | Patient201E  | Patient222A |
| 183 | Patient201E  | Patient222B |
| 183 | Patient201E  | Patient252B |
| 183 | Patient213B  | Patient246A |
| 183 | Patient218A  | Patient232D |
| 183 | Patient222E  | Patient232A |
| 183 | Patient222F  | Patient232C |
| 183 | Patient232B  | Patient236A |
| 183 | Patient232C  | Patient236B |
| 183 | Patient232D  | Patient236B |
| 184 | Patient028   | Patient196C |
| 184 | Patient032B  | Patient261G |
| 184 | Patient034A  | Patient074A |
| 184 | Patient034A  | Patient103B |
| 184 | Patient034C  | Patient181A |
| 184 | Patient034D  | Patient074B |
| 184 | Patient034E  | Patient074B |
| 184 | Patient045D  | Patient094B |
| 184 | Patient045D  | Patient126E |
| 184 | Patient056   | Patient091B |
| 184 | Patient079A1 | Patient246E |
| 184 | Patient079B  | Patient246B |
| 184 | Patient079C  | Patient246E |
| 184 | Patient094B  | Patient263A |
| 184 | Patient094C  | Patient222C |
| 184 | Patient094C  | Patient232A |
| 184 | Patient094D  | Patient246A |
| 184 | Patient099C  | Patient108F |
| 184 | Patient099C  | Patient109E |

|     |              |              |
|-----|--------------|--------------|
| 184 | Patient099C  | Patient149B  |
| 184 | Patient099D  | Patient108B2 |
| 184 | Patient099D  | Patient109C  |
| 184 | Patient099E  | Patient126D  |
| 184 | Patient099E  | Patient263A  |
| 184 | Patient103B  | Patient261G  |
| 184 | Patient104A  | Patient196B  |
| 184 | Patient104A  | Patient222C  |
| 184 | Patient104A  | Patient263A  |
| 184 | Patient104A  | Patient265   |
| 184 | Patient104B  | Patient196C  |
| 184 | Patient104B  | Patient196E  |
| 184 | Patient104B  | Patient252A  |
| 184 | Patient108B1 | Patient196D  |
| 184 | Patient108B2 | Patient196D  |
| 184 | Patient108D  | Patient246C  |
| 184 | Patient108G  | Patient232A  |
| 184 | Patient108G  | Patient232B  |
| 184 | Patient108H  | Patient232B  |
| 184 | Patient109A  | Patient232C  |
| 184 | Patient109A  | Patient246C  |
| 184 | Patient109B  | Patient232D  |
| 184 | Patient126D  | Patient232C  |
| 184 | Patient127B  | Patient131   |
| 184 | Patient141A  | Patient261G  |
| 184 | Patient141F  | Patient181B  |
| 184 | Patient141F  | Patient230B  |
| 184 | Patient196C  | Patient232E  |
| 184 | Patient196E  | Patient232E  |
| 184 | Patient196F  | Patient201E  |
| 184 | Patient201A  | Patient222E  |
| 184 | Patient201B  | Patient252F  |
| 184 | Patient201E  | Patient222F  |
| 184 | Patient222B  | Patient232C  |
| 184 | Patient222E  | Patient232C  |
| 184 | Patient232C  | Patient252F  |
| 184 | Patient246E  | Patient252B  |
| 185 | Patient028   | Patient196F  |
| 185 | Patient032C  | Patient074E  |
| 185 | Patient034A  | Patient103A  |
| 185 | Patient034A  | Patient230B  |
| 185 | Patient034B  | Patient103A  |
| 185 | Patient034D  | Patient074A  |
| 185 | Patient034D  | Patient103A  |
| 185 | Patient034E  | Patient103B  |
| 185 | Patient034E  | Patient230E  |
| 185 | Patient034E  | Patient261G  |
| 185 | Patient045D  | Patient094C  |
| 185 | Patient045D  | Patient184   |
| 185 | Patient079A2 | Patient246E  |

|     |             |             |
|-----|-------------|-------------|
| 185 | Patient097A | Patient246A |
| 185 | Patient099B | Patient222D |
| 185 | Patient099C | Patient109C |
| 185 | Patient099D | Patient218B |
| 185 | Patient099E | Patient109D |
| 185 | Patient099E | Patient265  |
| 185 | Patient103A | Patient181A |
| 185 | Patient103A | Patient230A |
| 185 | Patient104A | Patient196C |
| 185 | Patient104A | Patient222B |
| 185 | Patient104A | Patient263B |
| 185 | Patient108G | Patient232D |
| 185 | Patient108G | Patient232E |
| 185 | Patient109D | Patient196D |
| 185 | Patient109E | Patient232B |
| 185 | Patient131  | Patient265  |
| 185 | Patient141G | Patient261G |
| 185 | Patient145B | Patient224A |
| 185 | Patient149B | Patient232B |
| 185 | Patient196E | Patient232D |
| 185 | Patient201B | Patient218B |
| 185 | Patient218A | Patient232C |
| 185 | Patient218B | Patient232A |
| 185 | Patient218B | Patient232B |
| 185 | Patient220A | Patient232B |
| 185 | Patient220A | Patient232E |
| 185 | Patient222E | Patient232E |
| 185 | Patient246B | Patient252B |
| 186 | Patient028  | Patient126D |
| 186 | Patient032B | Patient230B |
| 186 | Patient032C | Patient230B |
| 186 | Patient032C | Patient261D |
| 186 | Patient034A | Patient181B |
| 186 | Patient034B | Patient074A |
| 186 | Patient034B | Patient103B |
| 186 | Patient034B | Patient230E |
| 186 | Patient034B | Patient230F |
| 186 | Patient034B | Patient261G |
| 186 | Patient034C | Patient074B |
| 186 | Patient034C | Patient230A |
| 186 | Patient034D | Patient103B |
| 186 | Patient034D | Patient230E |
| 186 | Patient034D | Patient230F |
| 186 | Patient034E | Patient103A |
| 186 | Patient045D | Patient201B |
| 186 | Patient066E | Patient145B |
| 186 | Patient074E | Patient230C |
| 186 | Patient074E | Patient261E |
| 186 | Patient093B | Patient246E |
| 186 | Patient094C | Patient196F |

|     |              |             |
|-----|--------------|-------------|
| 186 | Patient094E  | Patient246A |
| 186 | Patient099C  | Patient126D |
| 186 | Patient099C  | Patient263A |
| 186 | Patient099D  | Patient108F |
| 186 | Patient099D  | Patient109E |
| 186 | Patient099D  | Patient149B |
| 186 | Patient099D  | Patient263A |
| 186 | Patient104A  | Patient196F |
| 186 | Patient104A  | Patient222E |
| 186 | Patient104A  | Patient222F |
| 186 | Patient104B  | Patient252F |
| 186 | Patient108A  | Patient246B |
| 186 | Patient108B1 | Patient246A |
| 186 | Patient108F  | Patient196D |
| 186 | Patient108H  | Patient232E |
| 186 | Patient109C  | Patient232B |
| 186 | Patient109E  | Patient232D |
| 186 | Patient126E  | Patient263A |
| 186 | Patient131   | Patient236A |
| 186 | Patient149B  | Patient196D |
| 186 | Patient149B  | Patient232A |
| 186 | Patient157   | Patient222C |
| 186 | Patient184   | Patient246C |
| 186 | Patient195   | Patient230G |
| 186 | Patient196C  | Patient201A |
| 186 | Patient196C  | Patient232C |
| 186 | Patient196D  | Patient218B |
| 186 | Patient196D  | Patient265  |
| 186 | Patient196E  | Patient201B |
| 186 | Patient201A  | Patient218A |
| 186 | Patient201E  | Patient222E |
| 186 | Patient218B  | Patient232D |
| 186 | Patient218B  | Patient232E |
| 186 | Patient220A  | Patient232A |
| 186 | Patient232A  | Patient252F |
| 186 | Patient232D  | Patient236A |
| 186 | Patient232E  | Patient236A |
| 187 | Patient032A  | Patient145B |
| 187 | Patient032B  | Patient074C |
| 187 | Patient032B  | Patient181B |
| 187 | Patient034D  | Patient261G |
| 187 | Patient034E  | Patient074A |
| 187 | Patient034E  | Patient230F |
| 187 | Patient074C  | Patient261G |
| 187 | Patient079C  | Patient246D |
| 187 | Patient093B  | Patient246B |
| 187 | Patient099C  | Patient222D |
| 187 | Patient099C  | Patient265  |
| 187 | Patient099D  | Patient263B |
| 187 | Patient099E  | Patient263B |

|     |              |             |
|-----|--------------|-------------|
| 187 | Patient103A  | Patient261G |
| 187 | Patient104A  | Patient252B |
| 187 | Patient104B  | Patient222E |
| 187 | Patient108F  | Patient232B |
| 187 | Patient108G  | Patient232C |
| 187 | Patient109D  | Patient232B |
| 187 | Patient109E  | Patient232A |
| 187 | Patient126D  | Patient196F |
| 187 | Patient126E  | Patient157  |
| 187 | Patient127A  | Patient246C |
| 187 | Patient131   | Patient187  |
| 187 | Patient141F  | Patient261D |
| 187 | Patient149B  | Patient232D |
| 187 | Patient149B  | Patient232E |
| 187 | Patient196D  | Patient220A |
| 187 | Patient196E  | Patient232C |
| 187 | Patient201A  | Patient252F |
| 187 | Patient201E  | Patient218A |
| 187 | Patient201E  | Patient252F |
| 187 | Patient232A  | Patient236A |
| 187 | Patient232E  | Patient252F |
| 187 | Patient246B  | Patient252A |
| 188 | Patient026C  | Patient224A |
| 188 | Patient028   | Patient218A |
| 188 | Patient032C  | Patient261G |
| 188 | Patient032D  | Patient074D |
| 188 | Patient034A  | Patient074C |
| 188 | Patient034C  | Patient103B |
| 188 | Patient034E  | Patient230B |
| 188 | Patient074E  | Patient141D |
| 188 | Patient074E  | Patient261C |
| 188 | Patient079B  | Patient246E |
| 188 | Patient097C  | Patient246A |
| 188 | Patient099C  | Patient109D |
| 188 | Patient099C  | Patient149A |
| 188 | Patient099C  | Patient263B |
| 188 | Patient099D  | Patient109D |
| 188 | Patient099D  | Patient126D |
| 188 | Patient099D  | Patient149A |
| 188 | Patient099D  | Patient222D |
| 188 | Patient099D  | Patient265  |
| 188 | Patient104A  | Patient196E |
| 188 | Patient104B  | Patient218A |
| 188 | Patient108B2 | Patient246A |
| 188 | Patient108H  | Patient232A |
| 188 | Patient108H  | Patient232C |
| 188 | Patient108H  | Patient232D |
| 188 | Patient108H  | Patient246C |
| 188 | Patient109B  | Patient246C |
| 188 | Patient109C  | Patient232E |

|     |             |             |
|-----|-------------|-------------|
| 188 | Patient109D | Patient232E |
| 188 | Patient109E | Patient232E |
| 188 | Patient126D | Patient263B |
| 188 | Patient127B | Patient246A |
| 188 | Patient127B | Patient246C |
| 188 | Patient157  | Patient196A |
| 188 | Patient157  | Patient196B |
| 188 | Patient157  | Patient222B |
| 188 | Patient196D | Patient263B |
| 188 | Patient196E | Patient201A |
| 188 | Patient201A | Patient218B |
| 188 | Patient213B | Patient246C |
| 188 | Patient218B | Patient232C |
| 188 | Patient220A | Patient232D |
| 188 | Patient232C | Patient236A |
| 188 | Patient232D | Patient252F |
| 189 | Patient028  | Patient196E |
| 189 | Patient028  | Patient252F |
| 189 | Patient032A | Patient074D |
| 189 | Patient034B | Patient074C |
| 189 | Patient034B | Patient230B |
| 189 | Patient034C | Patient074A |
| 189 | Patient034C | Patient103A |
| 189 | Patient034C | Patient230F |
| 189 | Patient034D | Patient074C |
| 189 | Patient034E | Patient181B |
| 189 | Patient045D | Patient201A |
| 189 | Patient066F | Patient145B |
| 189 | Patient093C | Patient246E |
| 189 | Patient094D | Patient246C |
| 189 | Patient097A | Patient246C |
| 189 | Patient097D | Patient246A |
| 189 | Patient108A | Patient246E |
| 189 | Patient108F | Patient232A |
| 189 | Patient108F | Patient246A |
| 189 | Patient109A | Patient246B |
| 189 | Patient109C | Patient232A |
| 189 | Patient109C | Patient232D |
| 189 | Patient109D | Patient232A |
| 189 | Patient109D | Patient232D |
| 189 | Patient131  | Patient196B |
| 189 | Patient141D | Patient145B |
| 189 | Patient149A | Patient232B |
| 189 | Patient149A | Patient232E |
| 189 | Patient149B | Patient232C |
| 189 | Patient157  | Patient222F |
| 189 | Patient181B | Patient230A |
| 189 | Patient181B | Patient230F |
| 189 | Patient196E | Patient201E |
| 189 | Patient201E | Patient218B |



|     |              |             |
|-----|--------------|-------------|
| 189 | Patient217D  | Patient230G |
| 189 | Patient232B  | Patient263B |
| 189 | Patient246E  | Patient252A |
| 190 | Patient026C  | Patient032D |
| 190 | Patient028   | Patient218B |
| 190 | Patient032E  | Patient145B |
| 190 | Patient034A  | Patient145B |
| 190 | Patient034B  | Patient181B |
| 190 | Patient034C  | Patient230E |
| 190 | Patient034C  | Patient261G |
| 190 | Patient034D  | Patient230B |
| 190 | Patient074D  | Patient103A |
| 190 | Patient079A1 | Patient246D |
| 190 | Patient093C  | Patient246B |
| 190 | Patient094C  | Patient263A |
| 190 | Patient097B  | Patient246A |
| 190 | Patient099A  | Patient196D |
| 190 | Patient100A  | Patient157  |
| 190 | Patient104A  | Patient252A |
| 190 | Patient104B  | Patient218B |
| 190 | Patient108D  | Patient246B |
| 190 | Patient108F  | Patient232D |
| 190 | Patient109C  | Patient232C |
| 190 | Patient109D  | Patient232C |
| 190 | Patient109E  | Patient232C |
| 190 | Patient131   | Patient149B |
| 190 | Patient131   | Patient222B |
| 190 | Patient141F  | Patient261G |
| 190 | Patient149A  | Patient232A |
| 190 | Patient157   | Patient222A |
| 190 | Patient157   | Patient222E |
| 190 | Patient196C  | Patient201E |
| 190 | Patient196D  | Patient263A |
| 190 | Patient217B  | Patient230G |
| 190 | Patient217C  | Patient230G |
| 190 | Patient220A  | Patient232C |
| 190 | Patient232E  | Patient263B |
| 190 | Patient236B  | Patient246A |
| 190 | Patient246B  | Patient252F |
| 190 | Patient246E  | Patient252F |
| 191 | Patient028   | Patient131  |
| 191 | Patient032B  | Patient145B |
| 191 | Patient032D  | Patient074E |
| 191 | Patient034D  | Patient181B |
| 191 | Patient034E  | Patient074C |
| 191 | Patient045D  | Patient196D |
| 191 | Patient079A2 | Patient246D |
| 191 | Patient079C  | Patient247C |
| 191 | Patient100A  | Patient196D |
| 191 | Patient100A  | Patient232B |

|     |              |             |
|-----|--------------|-------------|
| 191 | Patient100A  | Patient232E |
| 191 | Patient103A  | Patient230F |
| 191 | Patient108D  | Patient246E |
| 191 | Patient108F  | Patient232E |
| 191 | Patient108G  | Patient246C |
| 191 | Patient127A  | Patient246B |
| 191 | Patient131   | Patient220A |
| 191 | Patient131   | Patient222F |
| 191 | Patient181B  | Patient230E |
| 191 | Patient232A  | Patient263B |
| 192 | Patient028   | Patient099A |
| 192 | Patient028   | Patient099B |
| 192 | Patient028   | Patient201B |
| 192 | Patient032E  | Patient145C |
| 192 | Patient034E  | Patient145B |
| 192 | Patient045D  | Patient157  |
| 192 | Patient045D  | Patient201E |
| 192 | Patient079A1 | Patient247B |
| 192 | Patient079C  | Patient247A |
| 192 | Patient079C  | Patient247B |
| 192 | Patient099A  | Patient232B |
| 192 | Patient099B  | Patient196D |
| 192 | Patient100A  | Patient232A |
| 192 | Patient103A  | Patient230B |
| 192 | Patient104A  | Patient218A |
| 192 | Patient109A  | Patient246E |
| 192 | Patient131   | Patient196A |
| 192 | Patient141C  | Patient145B |
| 192 | Patient149A  | Patient232D |
| 192 | Patient157   | Patient196C |
| 192 | Patient157   | Patient196F |
| 192 | Patient159   | Patient246A |
| 192 | Patient184   | Patient246B |
| 192 | Patient217A  | Patient230G |
| 192 | Patient217E  | Patient230G |
| 192 | Patient217F  | Patient230G |
| 192 | Patient217H  | Patient230G |
| 192 | Patient232C  | Patient263B |
| 192 | Patient232D  | Patient263B |
| 192 | Patient246A  | Patient252D |
| 193 | Patient028   | Patient099E |
| 193 | Patient028   | Patient104B |
| 193 | Patient032A  | Patient074E |
| 193 | Patient032B  | Patient074D |
| 193 | Patient032E  | Patient195  |
| 193 | Patient034B  | Patient145B |
| 193 | Patient034C  | Patient181B |
| 193 | Patient034C  | Patient230B |
| 193 | Patient074D  | Patient261G |
| 193 | Patient079A1 | Patient247A |

|     |              |             |
|-----|--------------|-------------|
| 193 | Patient079A1 | Patient247C |
| 193 | Patient079A2 | Patient247B |
| 193 | Patient079B  | Patient246D |
| 193 | Patient093B  | Patient246D |
| 193 | Patient094E  | Patient246C |
| 193 | Patient097E  | Patient246A |
| 193 | Patient099A  | Patient157  |
| 193 | Patient099B  | Patient157  |
| 193 | Patient100A  | Patient201B |
| 193 | Patient104A  | Patient252F |
| 193 | Patient126D  | Patient196D |
| 193 | Patient131   | Patient222E |
| 193 | Patient141B  | Patient145B |
| 193 | Patient141C  | Patient230E |
| 193 | Patient141F  | Patient195  |
| 193 | Patient149A  | Patient232C |
| 193 | Patient181B  | Patient230B |
| 193 | Patient184   | Patient246E |
| 193 | Patient222D  | Patient232B |
| 193 | Patient246C  | Patient252D |
| 193 | Patient246D  | Patient252B |
| 194 | Patient028   | Patient100A |
| 194 | Patient028   | Patient201A |
| 194 | Patient032C  | Patient145B |
| 194 | Patient034C  | Patient074C |
| 194 | Patient034D  | Patient145B |
| 194 | Patient074B  | Patient145B |
| 194 | Patient074E  | Patient103A |
| 194 | Patient079A2 | Patient247A |
| 194 | Patient079A2 | Patient247C |
| 194 | Patient093B  | Patient247C |
| 194 | Patient094A  | Patient246C |
| 194 | Patient097C  | Patient246C |
| 194 | Patient097D  | Patient246C |
| 194 | Patient099A  | Patient232A |
| 194 | Patient099B  | Patient232B |
| 194 | Patient099B  | Patient232E |
| 194 | Patient100A  | Patient104B |
| 194 | Patient100A  | Patient232D |
| 194 | Patient103A  | Patient181B |
| 194 | Patient104A  | Patient218B |
| 194 | Patient104B  | Patient201B |
| 194 | Patient108B1 | Patient246C |
| 194 | Patient108F  | Patient232C |
| 194 | Patient109B  | Patient246B |
| 194 | Patient109C  | Patient246A |
| 194 | Patient109E  | Patient246A |
| 194 | Patient127A  | Patient246E |
| 194 | Patient131   | Patient222A |
| 194 | Patient149A  | Patient196D |

|     |              |             |
|-----|--------------|-------------|
| 194 | Patient157   | Patient196E |
| 194 | Patient220A  | Patient246A |
| 194 | Patient222C  | Patient232B |
| 194 | Patient232B  | Patient265  |
| 194 | Patient236A  | Patient246A |
| 194 | Patient236B  | Patient246C |
| 195 | Patient026C  | Patient032A |
| 195 | Patient026C  | Patient141D |
| 195 | Patient032C  | Patient145C |
| 195 | Patient034A  | Patient074D |
| 195 | Patient045D  | Patient104B |
| 195 | Patient094D  | Patient246E |
| 195 | Patient099A  | Patient232D |
| 195 | Patient099A  | Patient232E |
| 195 | Patient099B  | Patient201B |
| 195 | Patient099D  | Patient196D |
| 195 | Patient099E  | Patient196D |
| 195 | Patient100A  | Patient232C |
| 195 | Patient103A  | Patient230E |
| 195 | Patient108B2 | Patient246C |
| 195 | Patient108F  | Patient246C |
| 195 | Patient108G  | Patient246B |
| 195 | Patient126D  | Patient201B |
| 195 | Patient127B  | Patient246B |
| 195 | Patient131   | Patient196C |
| 195 | Patient131   | Patient196E |
| 195 | Patient131   | Patient232B |
| 195 | Patient131   | Patient263B |
| 195 | Patient141B  | Patient230E |
| 195 | Patient141C  | Patient230A |
| 195 | Patient141C  | Patient230F |
| 195 | Patient145B  | Patient181A |
| 195 | Patient145B  | Patient230G |
| 195 | Patient157   | Patient196D |
| 195 | Patient195   | Patient230C |
| 195 | Patient213B  | Patient246B |
| 195 | Patient213B  | Patient246E |
| 195 | Patient222D  | Patient232D |
| 195 | Patient232A  | Patient265  |
| 195 | Patient246A  | Patient265  |
| 195 | Patient247B  | Patient252B |
| 196 | Patient028   | Patient104A |
| 196 | Patient028   | Patient201E |
| 196 | Patient032C  | Patient195  |
| 196 | Patient045D  | Patient104A |
| 196 | Patient074A  | Patient145B |
| 196 | Patient093C  | Patient246D |
| 196 | Patient094D  | Patient246B |
| 196 | Patient097A  | Patient246E |
| 196 | Patient099B  | Patient232A |

|     |              |             |
|-----|--------------|-------------|
| 196 | Patient099B  | Patient232D |
| 196 | Patient100A  | Patient201A |
| 196 | Patient100A  | Patient201E |
| 196 | Patient103C  | Patient145B |
| 196 | Patient104A  | Patient201B |
| 196 | Patient108A  | Patient246D |
| 196 | Patient108H  | Patient246B |
| 196 | Patient109B  | Patient246E |
| 196 | Patient131   | Patient201E |
| 196 | Patient131   | Patient218B |
| 196 | Patient145C  | Patient230G |
| 196 | Patient195   | Patient261C |
| 196 | Patient195   | Patient261E |
| 196 | Patient217C  | Patient261E |
| 196 | Patient222C  | Patient232A |
| 196 | Patient222C  | Patient232D |
| 196 | Patient222C  | Patient232E |
| 196 | Patient232C  | Patient265  |
| 196 | Patient232D  | Patient265  |
| 196 | Patient232E  | Patient265  |
| 196 | Patient246D  | Patient252F |
| 196 | Patient247A  | Patient252B |
| 196 | Patient247C  | Patient252B |
| 197 | Patient032B  | Patient074E |
| 197 | Patient034B  | Patient074D |
| 197 | Patient034C  | Patient145B |
| 197 | Patient079A1 | Patient247E |
| 197 | Patient079C  | Patient247E |
| 197 | Patient093B  | Patient247A |
| 197 | Patient093B  | Patient247B |
| 197 | Patient093C  | Patient247C |
| 197 | Patient097A  | Patient246B |
| 197 | Patient099A  | Patient201A |
| 197 | Patient099A  | Patient201B |
| 197 | Patient099A  | Patient232C |
| 197 | Patient099B  | Patient104B |
| 197 | Patient099C  | Patient196D |
| 197 | Patient099D  | Patient157  |
| 197 | Patient099E  | Patient157  |
| 197 | Patient099E  | Patient201B |
| 197 | Patient099E  | Patient232D |
| 197 | Patient104B  | Patient126D |
| 197 | Patient108A  | Patient247B |
| 197 | Patient108B1 | Patient246B |
| 197 | Patient131   | Patient201A |
| 197 | Patient131   | Patient201B |
| 197 | Patient131   | Patient218A |
| 197 | Patient131   | Patient232A |
| 197 | Patient141B  | Patient230A |
| 197 | Patient149B  | Patient246A |

|     |              |             |
|-----|--------------|-------------|
| 197 | Patient159   | Patient246C |
| 197 | Patient181A  | Patient230D |
| 197 | Patient217C  | Patient230C |
| 197 | Patient217D  | Patient261E |
| 197 | Patient217I  | Patient230G |
| 197 | Patient222D  | Patient232A |
| 197 | Patient222D  | Patient232C |
| 197 | Patient236A  | Patient246C |
| 197 | Patient246D  | Patient252A |
| 197 | Patient247C  | Patient252A |
| 198 | Patient026C  | Patient224B |
| 198 | Patient028   | Patient099C |
| 198 | Patient034A  | Patient074E |
| 198 | Patient034D  | Patient074D |
| 198 | Patient034E  | Patient074D |
| 198 | Patient079A2 | Patient247E |
| 198 | Patient097E  | Patient246C |
| 198 | Patient099A  | Patient104B |
| 198 | Patient099B  | Patient232C |
| 198 | Patient099C  | Patient157  |
| 198 | Patient099C  | Patient201B |
| 198 | Patient099D  | Patient201B |
| 198 | Patient099E  | Patient104B |
| 198 | Patient099E  | Patient232B |
| 198 | Patient104B  | Patient201A |
| 198 | Patient104B  | Patient201E |
| 198 | Patient108A  | Patient247A |
| 198 | Patient108A  | Patient247C |
| 198 | Patient108G  | Patient246E |
| 198 | Patient108H  | Patient246E |
| 198 | Patient109C  | Patient246C |
| 198 | Patient109D  | Patient246A |
| 198 | Patient126D  | Patient201A |
| 198 | Patient127B  | Patient246E |
| 198 | Patient131   | Patient232C |
| 198 | Patient141A  | Patient145B |
| 198 | Patient141B  | Patient230F |
| 198 | Patient141G  | Patient195  |
| 198 | Patient145B  | Patient261B |
| 198 | Patient145B  | Patient261E |
| 198 | Patient149A  | Patient246A |
| 198 | Patient149A  | Patient246C |
| 198 | Patient157   | Patient201B |
| 198 | Patient201B  | Patient232B |
| 198 | Patient217B  | Patient261E |
| 198 | Patient217C  | Patient261C |
| 198 | Patient217D  | Patient230C |
| 198 | Patient222C  | Patient232C |
| 198 | Patient247A  | Patient252A |
| 198 | Patient247B  | Patient252A |

|     |              |             |
|-----|--------------|-------------|
| 198 | Patient247E  | Patient252B |
| 199 | Patient032D  | Patient230D |
| 199 | Patient034C  | Patient074D |
| 199 | Patient074E  | Patient261G |
| 199 | Patient079B  | Patient247B |
| 199 | Patient094E  | Patient246B |
| 199 | Patient094E  | Patient246E |
| 199 | Patient097B  | Patient246C |
| 199 | Patient099A  | Patient104A |
| 199 | Patient099B  | Patient201A |
| 199 | Patient099B  | Patient201E |
| 199 | Patient099C  | Patient232B |
| 199 | Patient099D  | Patient232B |
| 199 | Patient099E  | Patient232A |
| 199 | Patient099E  | Patient232E |
| 199 | Patient108B2 | Patient246B |
| 199 | Patient108D  | Patient246D |
| 199 | Patient109A  | Patient246D |
| 199 | Patient109E  | Patient246C |
| 199 | Patient141A  | Patient230E |
| 199 | Patient141D  | Patient230D |
| 199 | Patient141G  | Patient145B |
| 199 | Patient145C  | Patient261E |
| 199 | Patient157   | Patient222D |
| 199 | Patient196D  | Patient201B |
| 199 | Patient196D  | Patient232B |
| 199 | Patient196F  | Patient232B |
| 199 | Patient201B  | Patient232D |
| 199 | Patient217A  | Patient261E |
| 199 | Patient217B  | Patient230C |
| 199 | Patient217D  | Patient261C |
| 199 | Patient217E  | Patient261E |
| 199 | Patient217H  | Patient261E |
| 199 | Patient222D  | Patient232E |
| 199 | Patient246E  | Patient252D |
| 200 | Patient026C  | Patient032B |
| 200 | Patient028   | Patient099D |
| 200 | Patient034B  | Patient074E |
| 200 | Patient066D  | Patient145C |
| 200 | Patient079B  | Patient247C |
| 200 | Patient093C  | Patient247A |
| 200 | Patient093C  | Patient247B |
| 200 | Patient094A  | Patient246B |
| 200 | Patient094A  | Patient246E |
| 200 | Patient097D  | Patient246B |
| 200 | Patient097D  | Patient246E |
| 200 | Patient099A  | Patient201E |
| 200 | Patient099C  | Patient232D |
| 200 | Patient099C  | Patient232E |
| 200 | Patient100A  | Patient104A |

|     |              |             |
|-----|--------------|-------------|
| 200 | Patient104A  | Patient126D |
| 200 | Patient104A  | Patient201A |
| 200 | Patient108B1 | Patient246E |
| 200 | Patient108B2 | Patient246E |
| 200 | Patient108D  | Patient247A |
| 200 | Patient108D  | Patient247C |
| 200 | Patient126E  | Patient246A |
| 200 | Patient131   | Patient232E |
| 200 | Patient141C  | Patient230B |
| 200 | Patient141G  | Patient145C |
| 200 | Patient145B  | Patient230C |
| 200 | Patient145B  | Patient230E |
| 200 | Patient196D  | Patient232D |
| 200 | Patient196F  | Patient232D |
| 200 | Patient217A  | Patient230C |
| 200 | Patient217B  | Patient261C |
| 200 | Patient217E  | Patient230C |
| 200 | Patient217F  | Patient261E |
| 200 | Patient217H  | Patient230C |
| 200 | Patient246A  | Patient263A |
| 200 | Patient246A  | Patient263B |
| 200 | Patient247C  | Patient252F |
| 201 | Patient026C  | Patient034A |
| 201 | Patient026C  | Patient034B |
| 201 | Patient034D  | Patient074E |
| 201 | Patient034E  | Patient074E |
| 201 | Patient056   | Patient066B |
| 201 | Patient074C  | Patient145B |
| 201 | Patient079B  | Patient247A |
| 201 | Patient093E  | Patient247B |
| 201 | Patient097C  | Patient246B |
| 201 | Patient097C  | Patient246E |
| 201 | Patient099B  | Patient104A |
| 201 | Patient099C  | Patient232A |
| 201 | Patient099D  | Patient232E |
| 201 | Patient099E  | Patient104A |
| 201 | Patient099E  | Patient201A |
| 201 | Patient099E  | Patient232C |
| 201 | Patient104B  | Patient157  |
| 201 | Patient104B  | Patient222D |
| 201 | Patient108D  | Patient247B |
| 201 | Patient109A  | Patient247B |
| 201 | Patient109B  | Patient246D |
| 201 | Patient131   | Patient232D |
| 201 | Patient141A  | Patient230A |
| 201 | Patient145B  | Patient230A |
| 201 | Patient145B  | Patient230F |
| 201 | Patient145B  | Patient261A |
| 201 | Patient145C  | Patient230C |
| 201 | Patient157   | Patient232A |



|     |             |             |
|-----|-------------|-------------|
| 201 | Patient157  | Patient232B |
| 201 | Patient187  | Patient246A |
| 201 | Patient196D | Patient232E |
| 201 | Patient196F | Patient232E |
| 201 | Patient201B | Patient232A |
| 201 | Patient201B | Patient232C |
| 201 | Patient201B | Patient232E |
| 201 | Patient217A | Patient261C |
| 201 | Patient217E | Patient261C |
| 201 | Patient217F | Patient230C |
| 201 | Patient217F | Patient261C |
| 201 | Patient217H | Patient261C |
| 201 | Patient220A | Patient246C |
| 201 | Patient247B | Patient252F |
| 202 | Patient026C | Patient230G |
| 202 | Patient034C | Patient074E |
| 202 | Patient079B | Patient247E |
| 202 | Patient093E | Patient247A |
| 202 | Patient093E | Patient247C |
| 202 | Patient094A | Patient247B |
| 202 | Patient099C | Patient201A |
| 202 | Patient099D | Patient232D |
| 202 | Patient103B | Patient145B |
| 202 | Patient104A | Patient201E |
| 202 | Patient108F | Patient246E |
| 202 | Patient109A | Patient247A |
| 202 | Patient109A | Patient247C |
| 202 | Patient126D | Patient201E |
| 202 | Patient126D | Patient263A |
| 202 | Patient141A | Patient230F |
| 202 | Patient141B | Patient230B |
| 202 | Patient145B | Patient230D |
| 202 | Patient145B | Patient261C |
| 202 | Patient149B | Patient246C |
| 202 | Patient184  | Patient246D |
| 202 | Patient184  | Patient247A |
| 202 | Patient196D | Patient232A |
| 202 | Patient196D | Patient232C |
| 202 | Patient196F | Patient232A |
| 202 | Patient213B | Patient246D |
| 202 | Patient217J | Patient230G |
| 202 | Patient222C | Patient246A |
| 202 | Patient236B | Patient246B |
| 202 | Patient246B | Patient252D |
| 202 | Patient246C | Patient265  |
| 202 | Patient247A | Patient252F |
| 202 | Patient247E | Patient252A |
| 202 | Patient247E | Patient252F |
| 203 | Patient028  | Patient196D |
| 203 | Patient028  | Patient232B |

|     |             |             |
|-----|-------------|-------------|
| 203 | Patient093A | Patient247A |
| 203 | Patient093A | Patient247C |
| 203 | Patient093B | Patient247D |
| 203 | Patient093B | Patient247E |
| 203 | Patient094A | Patient247C |
| 203 | Patient094B | Patient247A |
| 203 | Patient094B | Patient247C |
| 203 | Patient097B | Patient246B |
| 203 | Patient099C | Patient104B |
| 203 | Patient099C | Patient232C |
| 203 | Patient099D | Patient232A |
| 203 | Patient099E | Patient201E |
| 203 | Patient104A | Patient222D |
| 203 | Patient104B | Patient196D |
| 203 | Patient108A | Patient247E |
| 203 | Patient108F | Patient246B |
| 203 | Patient108H | Patient246D |
| 203 | Patient109B | Patient247C |
| 203 | Patient109D | Patient246C |
| 203 | Patient127A | Patient247A |
| 203 | Patient127A | Patient247C |
| 203 | Patient145C | Patient224B |
| 203 | Patient145C | Patient261C |
| 203 | Patient157  | Patient201A |
| 203 | Patient157  | Patient201E |
| 203 | Patient157  | Patient232E |
| 203 | Patient196A | Patient246A |
| 203 | Patient196B | Patient246A |
| 203 | Patient196D | Patient201A |
| 203 | Patient201A | Patient232B |
| 203 | Patient201A | Patient232D |
| 203 | Patient213B | Patient247C |
| 203 | Patient236B | Patient246E |
| 204 | Patient026C | Patient034D |
| 204 | Patient026C | Patient034E |
| 204 | Patient032D | Patient145C |
| 204 | Patient032E | Patient145A |
| 204 | Patient066E | Patient145C |
| 204 | Patient093A | Patient247B |
| 204 | Patient093D | Patient247C |
| 204 | Patient094A | Patient247A |
| 204 | Patient094D | Patient246D |
| 204 | Patient097A | Patient246D |
| 204 | Patient097A | Patient247A |
| 204 | Patient097A | Patient247C |
| 204 | Patient099A | Patient131  |
| 204 | Patient099C | Patient201E |
| 204 | Patient099D | Patient201A |
| 204 | Patient099D | Patient232C |
| 204 | Patient108G | Patient246D |

|     |             |             |
|-----|-------------|-------------|
| 204 | Patient108G | Patient247B |
| 204 | Patient109B | Patient247B |
| 204 | Patient126E | Patient246C |
| 204 | Patient127A | Patient247B |
| 204 | Patient141F | Patient145B |
| 204 | Patient145B | Patient181B |
| 204 | Patient145C | Patient224A |
| 204 | Patient149A | Patient246B |
| 204 | Patient157  | Patient232C |
| 204 | Patient157  | Patient232D |
| 204 | Patient196D | Patient201E |
| 204 | Patient196F | Patient232C |
| 204 | Patient201A | Patient232A |
| 204 | Patient201E | Patient232B |
| 204 | Patient213B | Patient247A |
| 204 | Patient217I | Patient261E |
| 204 | Patient222F | Patient246A |
| 205 | Patient026C | Patient141C |
| 205 | Patient032A | Patient230D |
| 205 | Patient093D | Patient247A |
| 205 | Patient094D | Patient247C |
| 205 | Patient097A | Patient247B |
| 205 | Patient099D | Patient201E |
| 205 | Patient103A | Patient145B |
| 205 | Patient104A | Patient157  |
| 205 | Patient104A | Patient196D |
| 205 | Patient108D | Patient247E |
| 205 | Patient108G | Patient247A |
| 205 | Patient108G | Patient247C |
| 205 | Patient108H | Patient247C |
| 205 | Patient109B | Patient247A |
| 205 | Patient109C | Patient247C |
| 205 | Patient109E | Patient247A |
| 205 | Patient109E | Patient247C |
| 205 | Patient127A | Patient246D |
| 205 | Patient131  | Patient157  |
| 205 | Patient141F | Patient145C |
| 205 | Patient149A | Patient246E |
| 205 | Patient159  | Patient246B |
| 205 | Patient184  | Patient247C |
| 205 | Patient201A | Patient232E |
| 205 | Patient213B | Patient247B |
| 205 | Patient217I | Patient230C |
| 205 | Patient220A | Patient246B |
| 205 | Patient222E | Patient246A |
| 205 | Patient246C | Patient263A |
| 205 | Patient246C | Patient263B |
| 206 | Patient026C | Patient034C |
| 206 | Patient026C | Patient103A |
| 206 | Patient026C | Patient141B |

|     |              |             |
|-----|--------------|-------------|
| 206 | Patient028   | Patient232D |
| 206 | Patient066D  | Patient230A |
| 206 | Patient066D  | Patient230E |
| 206 | Patient066F  | Patient145C |
| 206 | Patient074B  | Patient145C |
| 206 | Patient093C  | Patient247D |
| 206 | Patient093C  | Patient247E |
| 206 | Patient093D  | Patient247B |
| 206 | Patient094B  | Patient247B |
| 206 | Patient094D  | Patient247A |
| 206 | Patient094D  | Patient247B |
| 206 | Patient094E  | Patient246D |
| 206 | Patient097B  | Patient246E |
| 206 | Patient099B  | Patient131  |
| 206 | Patient099C  | Patient104A |
| 206 | Patient099D  | Patient104B |
| 206 | Patient108B2 | Patient246D |
| 206 | Patient108F  | Patient247C |
| 206 | Patient108H  | Patient247B |
| 206 | Patient109E  | Patient246E |
| 206 | Patient109E  | Patient247B |
| 206 | Patient127B  | Patient246D |
| 206 | Patient131   | Patient222C |
| 206 | Patient131   | Patient222D |
| 206 | Patient141A  | Patient230B |
| 206 | Patient141C  | Patient230D |
| 206 | Patient159   | Patient246E |
| 206 | Patient184   | Patient247B |
| 206 | Patient195   | Patient261G |
| 206 | Patient196F  | Patient246A |
| 206 | Patient201E  | Patient232A |
| 206 | Patient201E  | Patient232C |
| 206 | Patient201E  | Patient232D |
| 206 | Patient201E  | Patient232E |
| 206 | Patient217I  | Patient261C |
| 206 | Patient222A  | Patient246A |
| 206 | Patient222B  | Patient246A |
| 206 | Patient222C  | Patient246C |
| 206 | Patient236A  | Patient246E |
| 207 | Patient028   | Patient232A |
| 207 | Patient028   | Patient232C |
| 207 | Patient028   | Patient232E |
| 207 | Patient032D  | Patient217C |
| 207 | Patient034A  | Patient230D |
| 207 | Patient045D  | Patient232B |
| 207 | Patient066D  | Patient230F |
| 207 | Patient074D  | Patient145B |
| 207 | Patient097C  | Patient246D |
| 207 | Patient097C  | Patient247B |
| 207 | Patient097E  | Patient246B |

|     |              |             |
|-----|--------------|-------------|
| 207 | Patient099D  | Patient104A |
| 207 | Patient108B1 | Patient246D |
| 207 | Patient108F  | Patient247A |
| 207 | Patient108H  | Patient247A |
| 207 | Patient109A  | Patient247E |
| 207 | Patient109C  | Patient246B |
| 207 | Patient109C  | Patient246E |
| 207 | Patient109C  | Patient247A |
| 207 | Patient109C  | Patient247B |
| 207 | Patient109D  | Patient246B |
| 207 | Patient109E  | Patient246B |
| 207 | Patient145B  | Patient230B |
| 207 | Patient150A  | Patient235F |
| 207 | Patient181B  | Patient230D |
| 207 | Patient187   | Patient246C |
| 207 | Patient196C  | Patient246A |
| 207 | Patient196F  | Patient246C |
| 207 | Patient201A  | Patient232C |
| 207 | Patient217C  | Patient261G |
| 207 | Patient236A  | Patient246B |
| 207 | Patient236B  | Patient246D |
| 208 | Patient032B  | Patient230D |
| 208 | Patient032D  | Patient217D |
| 208 | Patient074A  | Patient145C |
| 208 | Patient079C  | Patient247D |
| 208 | Patient093A  | Patient247D |
| 208 | Patient094A  | Patient247D |
| 208 | Patient097A  | Patient247E |
| 208 | Patient097C  | Patient247A |
| 208 | Patient097C  | Patient247C |
| 208 | Patient097D  | Patient246D |
| 208 | Patient097E  | Patient246E |
| 208 | Patient099E  | Patient131  |
| 208 | Patient104B  | Patient246A |
| 208 | Patient108F  | Patient246D |
| 208 | Patient108F  | Patient247B |
| 208 | Patient126D  | Patient157  |
| 208 | Patient126E  | Patient246B |
| 208 | Patient127B  | Patient247C |
| 208 | Patient141B  | Patient230D |
| 208 | Patient141D  | Patient217C |
| 208 | Patient150B  | Patient235F |
| 208 | Patient196A  | Patient246C |
| 208 | Patient196B  | Patient246C |
| 208 | Patient196E  | Patient246A |
| 208 | Patient213B  | Patient247E |
| 208 | Patient217D  | Patient261G |
| 208 | Patient220A  | Patient246E |
| 208 | Patient246B  | Patient265  |
| 209 | Patient026C  | Patient261E |

|     |              |             |
|-----|--------------|-------------|
| 209 | Patient032A  | Patient145C |
| 209 | Patient032C  | Patient145A |
| 209 | Patient034E  | Patient230D |
| 209 | Patient045D  | Patient232A |
| 209 | Patient066D  | Patient230B |
| 209 | Patient079A1 | Patient247D |
| 209 | Patient093E  | Patient247D |
| 209 | Patient094C  | Patient247A |
| 209 | Patient094E  | Patient247B |
| 209 | Patient094E  | Patient247C |
| 209 | Patient097D  | Patient247A |
| 209 | Patient097D  | Patient247B |
| 209 | Patient097E  | Patient246D |
| 209 | Patient099C  | Patient131  |
| 209 | Patient109B  | Patient247E |
| 209 | Patient127A  | Patient247D |
| 209 | Patient141D  | Patient145C |
| 209 | Patient141D  | Patient217D |
| 209 | Patient145A  | Patient230G |
| 209 | Patient145B  | Patient261D |
| 209 | Patient149B  | Patient246B |
| 209 | Patient149B  | Patient246E |
| 209 | Patient150C  | Patient235F |
| 209 | Patient217B  | Patient261G |
| 209 | Patient222A  | Patient246C |
| 209 | Patient222F  | Patient246C |
| 210 | Patient023   | Patient157  |
| 210 | Patient032D  | Patient217A |
| 210 | Patient032D  | Patient217B |
| 210 | Patient032D  | Patient217E |
| 210 | Patient032D  | Patient217H |
| 210 | Patient034B  | Patient230D |
| 210 | Patient045D  | Patient232E |
| 210 | Patient066E  | Patient230E |
| 210 | Patient079A2 | Patient247D |
| 210 | Patient094C  | Patient247C |
| 210 | Patient097D  | Patient247C |
| 210 | Patient097E  | Patient247A |
| 210 | Patient097E  | Patient247C |
| 210 | Patient104B  | Patient232B |
| 210 | Patient108B1 | Patient247B |
| 210 | Patient108B2 | Patient247A |
| 210 | Patient109D  | Patient246E |
| 210 | Patient109D  | Patient247A |
| 210 | Patient127A  | Patient247E |
| 210 | Patient127B  | Patient247A |
| 210 | Patient141D  | Patient217B |
| 210 | Patient157   | Patient246A |
| 210 | Patient184   | Patient247E |
| 210 | Patient217A  | Patient261G |

|     |              |             |
|-----|--------------|-------------|
| 210 | Patient217C  | Patient224A |
| 210 | Patient217E  | Patient261G |
| 210 | Patient217H  | Patient261G |
| 210 | Patient232B  | Patient263A |
| 210 | Patient247D  | Patient252B |
| 211 | Patient023   | Patient093B |
| 211 | Patient026C  | Patient141A |
| 211 | Patient026C  | Patient230C |
| 211 | Patient026C  | Patient261C |
| 211 | Patient032D  | Patient217F |
| 211 | Patient034A  | Patient145C |
| 211 | Patient034D  | Patient230D |
| 211 | Patient045D  | Patient232D |
| 211 | Patient066E  | Patient230A |
| 211 | Patient094A  | Patient246D |
| 211 | Patient094B  | Patient247D |
| 211 | Patient094C  | Patient247B |
| 211 | Patient094E  | Patient247A |
| 211 | Patient097C  | Patient247E |
| 211 | Patient097E  | Patient247B |
| 211 | Patient103C  | Patient145C |
| 211 | Patient104A  | Patient232B |
| 211 | Patient108B1 | Patient247A |
| 211 | Patient108G  | Patient247E |
| 211 | Patient109D  | Patient247B |
| 211 | Patient109E  | Patient247E |
| 211 | Patient126E  | Patient246E |
| 211 | Patient127B  | Patient247B |
| 211 | Patient141C  | Patient145C |
| 211 | Patient141D  | Patient217A |
| 211 | Patient141D  | Patient217E |
| 211 | Patient141D  | Patient217H |
| 211 | Patient145B  | Patient261G |
| 211 | Patient150A  | Patient235E |
| 211 | Patient217A  | Patient224A |
| 211 | Patient217D  | Patient224A |
| 211 | Patient217F  | Patient261G |
| 211 | Patient217J  | Patient261E |
| 211 | Patient218A  | Patient246A |
| 211 | Patient222E  | Patient246C |
| 211 | Patient232A  | Patient263A |
| 211 | Patient232E  | Patient263A |
| 211 | Patient236B  | Patient247C |
| 211 | Patient246D  | Patient252D |
| 211 | Patient246E  | Patient265  |
| 211 | Patient247C  | Patient252D |
| 211 | Patient247D  | Patient252A |
| 212 | Patient032B  | Patient145C |
| 212 | Patient066E  | Patient230F |
| 212 | Patient066F  | Patient230E |

|     |              |             |
|-----|--------------|-------------|
| 212 | Patient066F  | Patient230F |
| 212 | Patient074E  | Patient145B |
| 212 | Patient093D  | Patient247D |
| 212 | Patient094D  | Patient247D |
| 212 | Patient094D  | Patient247E |
| 212 | Patient097B  | Patient246D |
| 212 | Patient097B  | Patient247B |
| 212 | Patient099D  | Patient131  |
| 212 | Patient104B  | Patient131  |
| 212 | Patient104B  | Patient232A |
| 212 | Patient104B  | Patient246C |
| 212 | Patient108A  | Patient247D |
| 212 | Patient108B1 | Patient247C |
| 212 | Patient108F  | Patient247E |
| 212 | Patient108H  | Patient247E |
| 212 | Patient109D  | Patient247C |
| 212 | Patient141A  | Patient230D |
| 212 | Patient141B  | Patient145C |
| 212 | Patient141D  | Patient217F |
| 212 | Patient145A  | Patient261E |
| 212 | Patient145C  | Patient261G |
| 212 | Patient149A  | Patient246D |
| 212 | Patient150B  | Patient235E |
| 212 | Patient187   | Patient246B |
| 212 | Patient196C  | Patient246C |
| 212 | Patient213B  | Patient247D |
| 212 | Patient217B  | Patient224A |
| 212 | Patient217J  | Patient230C |
| 212 | Patient217J  | Patient261C |
| 212 | Patient218B  | Patient246A |
| 212 | Patient222C  | Patient246E |
| 212 | Patient232C  | Patient263A |
| 212 | Patient236B  | Patient247B |
| 212 | Patient246B  | Patient263B |
| 212 | Patient247A  | Patient252D |
| 212 | Patient247B  | Patient252D |
| 213 | Patient023   | Patient196D |
| 213 | Patient032A  | Patient217C |
| 213 | Patient045A  | Patient192C |
| 213 | Patient066D  | Patient145A |
| 213 | Patient066F  | Patient230A |
| 213 | Patient074C  | Patient145C |
| 213 | Patient094A  | Patient247E |
| 213 | Patient094C  | Patient247D |
| 213 | Patient097B  | Patient247A |
| 213 | Patient097B  | Patient247C |
| 213 | Patient097D  | Patient247E |
| 213 | Patient103A  | Patient230D |
| 213 | Patient104A  | Patient232A |
| 213 | Patient104A  | Patient232D |



|     |              |             |
|-----|--------------|-------------|
| 213 | Patient104A  | Patient246A |
| 213 | Patient104B  | Patient232D |
| 213 | Patient104B  | Patient232E |
| 213 | Patient108B2 | Patient247C |
| 213 | Patient109C  | Patient247E |
| 213 | Patient127B  | Patient247E |
| 213 | Patient141G  | Patient145A |
| 213 | Patient150C  | Patient235E |
| 213 | Patient159   | Patient246D |
| 213 | Patient159   | Patient247C |
| 213 | Patient184   | Patient247D |
| 213 | Patient196A  | Patient246B |
| 213 | Patient217E  | Patient224A |
| 213 | Patient217H  | Patient224A |
| 213 | Patient222B  | Patient246C |
| 213 | Patient232D  | Patient263A |
| 213 | Patient236B  | Patient247A |
| 213 | Patient246B  | Patient263A |
| 214 | Patient023   | Patient093C |
| 214 | Patient026C  | Patient032E |
| 214 | Patient032A  | Patient217D |
| 214 | Patient034E  | Patient145C |
| 214 | Patient045A  | Patient192A |
| 214 | Patient045D  | Patient232C |
| 214 | Patient045D  | Patient246A |
| 214 | Patient093E  | Patient247E |
| 214 | Patient094E  | Patient247E |
| 214 | Patient097E  | Patient247E |
| 214 | Patient108B2 | Patient247B |
| 214 | Patient109C  | Patient246D |
| 214 | Patient109D  | Patient247E |
| 214 | Patient131   | Patient196D |
| 214 | Patient131   | Patient196F |
| 214 | Patient145A  | Patient230C |
| 214 | Patient187   | Patient246E |
| 214 | Patient196B  | Patient246B |
| 214 | Patient196E  | Patient246C |
| 214 | Patient217F  | Patient224A |
| 214 | Patient222A  | Patient246B |
| 214 | Patient222A  | Patient246E |
| 214 | Patient222C  | Patient246B |
| 214 | Patient222F  | Patient246E |
| 214 | Patient236A  | Patient246D |
| 214 | Patient236A  | Patient247C |
| 214 | Patient246E  | Patient263B |
| 214 | Patient247D  | Patient252F |
| 214 | Patient247E  | Patient252D |
| 215 | Patient026C  | Patient230A |
| 215 | Patient034B  | Patient145C |
| 215 | Patient034D  | Patient145C |

|     |              |             |
|-----|--------------|-------------|
| 215 | Patient045B  | Patient192A |
| 215 | Patient045B  | Patient192C |
| 215 | Patient066E  | Patient230B |
| 215 | Patient104A  | Patient232E |
| 215 | Patient104B  | Patient232C |
| 215 | Patient109E  | Patient246D |
| 215 | Patient120D  | Patient251  |
| 215 | Patient145C  | Patient181A |
| 215 | Patient159   | Patient247A |
| 215 | Patient192A  | Patient251  |
| 215 | Patient196B  | Patient246E |
| 215 | Patient196F  | Patient246E |
| 215 | Patient201B  | Patient246A |
| 215 | Patient217I  | Patient261G |
| 215 | Patient218A  | Patient246C |
| 215 | Patient246D  | Patient265  |
| 215 | Patient246E  | Patient263A |
| 215 | Patient247C  | Patient265  |
| 216 | Patient028   | Patient246A |
| 216 | Patient032A  | Patient217B |
| 216 | Patient032A  | Patient217E |
| 216 | Patient032A  | Patient217H |
| 216 | Patient032D  | Patient145A |
| 216 | Patient034C  | Patient230D |
| 216 | Patient066E  | Patient145A |
| 216 | Patient066F  | Patient230B |
| 216 | Patient093A  | Patient247E |
| 216 | Patient097B  | Patient247E |
| 216 | Patient100A  | Patient246A |
| 216 | Patient108B1 | Patient247E |
| 216 | Patient108B2 | Patient247E |
| 216 | Patient108D  | Patient247D |
| 216 | Patient109A  | Patient247D |
| 216 | Patient109D  | Patient246D |
| 216 | Patient127B  | Patient247D |
| 216 | Patient131   | Patient246A |
| 216 | Patient145A  | Patient224B |
| 216 | Patient145A  | Patient261C |
| 216 | Patient149B  | Patient246D |
| 216 | Patient149B  | Patient247B |
| 216 | Patient159   | Patient247B |
| 216 | Patient196A  | Patient246E |
| 216 | Patient220A  | Patient246D |
| 216 | Patient220A  | Patient247B |
| 216 | Patient222F  | Patient246B |
| 216 | Patient236A  | Patient247A |
| 216 | Patient247B  | Patient265  |
| 217 | Patient021A2 | Patient213B |
| 217 | Patient026C  | Patient032C |
| 217 | Patient032A  | Patient217A |

|     |              |             |
|-----|--------------|-------------|
| 217 | Patient032A  | Patient217F |
| 217 | Patient079B  | Patient247D |
| 217 | Patient094B  | Patient247E |
| 217 | Patient094E  | Patient247D |
| 217 | Patient104A  | Patient232C |
| 217 | Patient104A  | Patient246C |
| 217 | Patient126E  | Patient246D |
| 217 | Patient131   | Patient263A |
| 217 | Patient141A  | Patient145C |
| 217 | Patient149B  | Patient247A |
| 217 | Patient149B  | Patient247C |
| 217 | Patient181A  | Patient224B |
| 217 | Patient220A  | Patient247A |
| 217 | Patient220A  | Patient247C |
| 217 | Patient222B  | Patient246B |
| 217 | Patient236A  | Patient247B |
| 217 | Patient236B  | Patient247E |
| 217 | Patient247A  | Patient265  |
| 218 | Patient026C  | Patient230F |
| 218 | Patient032B  | Patient217C |
| 218 | Patient032D  | Patient217I |
| 218 | Patient034C  | Patient145C |
| 218 | Patient045C  | Patient192A |
| 218 | Patient045C  | Patient192C |
| 218 | Patient045D  | Patient246C |
| 218 | Patient066D  | Patient074B |
| 218 | Patient074B  | Patient145A |
| 218 | Patient093D  | Patient247E |
| 218 | Patient104B  | Patient246B |
| 218 | Patient120A  | Patient251  |
| 218 | Patient131   | Patient246C |
| 218 | Patient141F  | Patient145A |
| 218 | Patient145A  | Patient224A |
| 218 | Patient177   | Patient213A |
| 218 | Patient196F  | Patient246B |
| 218 | Patient201B  | Patient246C |
| 218 | Patient201E  | Patient246A |
| 218 | Patient222B  | Patient246E |
| 218 | Patient222E  | Patient246E |
| 218 | Patient247D  | Patient252D |
| 219 | Patient021A1 | Patient213B |
| 219 | Patient023   | Patient232B |
| 219 | Patient026C  | Patient141G |
| 219 | Patient026C  | Patient230B |
| 219 | Patient026C  | Patient230E |
| 219 | Patient032B  | Patient217D |
| 219 | Patient034A  | Patient217C |
| 219 | Patient074D  | Patient145C |
| 219 | Patient081A1 | Patient145B |
| 219 | Patient103A  | Patient145C |

|     |              |             |
|-----|--------------|-------------|
| 219 | Patient104A  | Patient131  |
| 219 | Patient141D  | Patient217I |
| 219 | Patient149A  | Patient247B |
| 219 | Patient149A  | Patient247C |
| 219 | Patient192C  | Patient251  |
| 219 | Patient196C  | Patient246E |
| 219 | Patient201A  | Patient246A |
| 219 | Patient218A  | Patient246B |
| 219 | Patient218B  | Patient246C |
| 219 | Patient222C  | Patient246D |
| 219 | Patient246D  | Patient263A |
| 220 | Patient013   | Patient072  |
| 220 | Patient026C  | Patient261G |
| 220 | Patient028   | Patient246C |
| 220 | Patient034A  | Patient217D |
| 220 | Patient045A  | Patient192B |
| 220 | Patient066D  | Patient074A |
| 220 | Patient066F  | Patient145A |
| 220 | Patient081B  | Patient145B |
| 220 | Patient099A  | Patient246A |
| 220 | Patient104B  | Patient246E |
| 220 | Patient120B  | Patient251  |
| 220 | Patient126D  | Patient246A |
| 220 | Patient149A  | Patient247A |
| 220 | Patient149A  | Patient247E |
| 220 | Patient196C  | Patient246B |
| 220 | Patient196E  | Patient246B |
| 220 | Patient222E  | Patient246B |
| 220 | Patient236A  | Patient247E |
| 221 | Patient023   | Patient232E |
| 221 | Patient032A  | Patient145A |
| 221 | Patient032B  | Patient217B |
| 221 | Patient032B  | Patient217E |
| 221 | Patient032B  | Patient217H |
| 221 | Patient034D  | Patient217C |
| 221 | Patient074A  | Patient145A |
| 221 | Patient081A2 | Patient145B |
| 221 | Patient099B  | Patient246A |
| 221 | Patient103B  | Patient145C |
| 221 | Patient108G  | Patient247D |
| 221 | Patient108H  | Patient247D |
| 221 | Patient109B  | Patient247D |
| 221 | Patient109C  | Patient247D |
| 221 | Patient109E  | Patient247D |
| 221 | Patient145B  | Patient195  |
| 221 | Patient149B  | Patient247E |
| 221 | Patient159   | Patient247E |
| 221 | Patient196B  | Patient247B |
| 221 | Patient196E  | Patient246E |
| 221 | Patient217I  | Patient224A |

|     |             |             |
|-----|-------------|-------------|
| 221 | Patient222A | Patient246D |
| 221 | Patient246D | Patient263B |
| 221 | Patient247C | Patient263A |
| 221 | Patient247E | Patient265  |
| 222 | Patient023  | Patient232A |
| 222 | Patient023  | Patient232C |
| 222 | Patient026C | Patient141F |
| 222 | Patient032B | Patient217A |
| 222 | Patient032B | Patient217F |
| 222 | Patient032D | Patient217J |
| 222 | Patient034A | Patient217B |
| 222 | Patient034A | Patient217E |
| 222 | Patient034A | Patient217H |
| 222 | Patient034E | Patient217C |
| 222 | Patient045B | Patient192B |
| 222 | Patient066D | Patient181A |
| 222 | Patient094C | Patient247E |
| 222 | Patient100A | Patient246C |
| 222 | Patient120C | Patient251  |
| 222 | Patient126D | Patient246C |
| 222 | Patient141D | Patient145A |
| 222 | Patient145C | Patient230A |
| 222 | Patient187  | Patient246D |
| 222 | Patient187  | Patient247A |
| 222 | Patient187  | Patient247B |
| 222 | Patient187  | Patient247C |
| 222 | Patient196B | Patient247A |
| 222 | Patient196F | Patient247A |
| 222 | Patient217J | Patient261G |
| 222 | Patient218A | Patient246E |
| 222 | Patient220A | Patient247D |
| 222 | Patient220A | Patient247E |
| 222 | Patient222C | Patient247A |
| 222 | Patient222C | Patient247B |
| 222 | Patient222C | Patient247C |
| 222 | Patient222E | Patient246D |
| 222 | Patient247B | Patient263A |
| 222 | Patient247C | Patient263B |
| 223 | Patient023  | Patient094D |
| 223 | Patient023  | Patient232D |
| 223 | Patient034A | Patient217A |
| 223 | Patient034A | Patient217F |
| 223 | Patient034B | Patient217C |
| 223 | Patient034D | Patient217D |
| 223 | Patient034E | Patient217D |
| 223 | Patient066E | Patient074B |
| 223 | Patient066F | Patient074B |
| 223 | Patient081C | Patient145B |
| 223 | Patient081D | Patient145B |
| 223 | Patient081E | Patient145B |

|     |             |             |
|-----|-------------|-------------|
| 223 | Patient099A | Patient246C |
| 223 | Patient099E | Patient246A |
| 223 | Patient104A | Patient246B |
| 223 | Patient108F | Patient247D |
| 223 | Patient126E | Patient247B |
| 223 | Patient141D | Patient217J |
| 223 | Patient196A | Patient246D |
| 223 | Patient196B | Patient246D |
| 223 | Patient196B | Patient247C |
| 223 | Patient196F | Patient247B |
| 223 | Patient196F | Patient247C |
| 223 | Patient218B | Patient246B |
| 223 | Patient222D | Patient247A |
| 223 | Patient222F | Patient246D |
| 223 | Patient247A | Patient263A |
| 223 | Patient247B | Patient263B |
| 224 | Patient023  | Patient159  |
| 224 | Patient032A | Patient217I |
| 224 | Patient034A | Patient145A |
| 224 | Patient034B | Patient217D |
| 224 | Patient034C | Patient217C |
| 224 | Patient034D | Patient217E |
| 224 | Patient034D | Patient217F |
| 224 | Patient045C | Patient192B |
| 224 | Patient066D | Patient074C |
| 224 | Patient066F | Patient074A |
| 224 | Patient074C | Patient145A |
| 224 | Patient081F | Patient145B |
| 224 | Patient097D | Patient247D |
| 224 | Patient099C | Patient246A |
| 224 | Patient103C | Patient145A |
| 224 | Patient103C | Patient181A |
| 224 | Patient104A | Patient246E |
| 224 | Patient109D | Patient247D |
| 224 | Patient126E | Patient247A |
| 224 | Patient126E | Patient247C |
| 224 | Patient141C | Patient145A |
| 224 | Patient145C | Patient181B |
| 224 | Patient145C | Patient230E |
| 224 | Patient159  | Patient247D |
| 224 | Patient181B | Patient224B |
| 224 | Patient196A | Patient247B |
| 224 | Patient196F | Patient246D |
| 224 | Patient201A | Patient246C |
| 224 | Patient222F | Patient247A |
| 224 | Patient232B | Patient246A |
| 224 | Patient247A | Patient263B |
| 225 | Patient023  | Patient094E |
| 225 | Patient023  | Patient213B |
| 225 | Patient032B | Patient145A |

|     |              |             |
|-----|--------------|-------------|
| 225 | Patient034C  | Patient217D |
| 225 | Patient034D  | Patient217B |
| 225 | Patient034D  | Patient217H |
| 225 | Patient034E  | Patient217B |
| 225 | Patient034E  | Patient217E |
| 225 | Patient034E  | Patient217H |
| 225 | Patient066E  | Patient074A |
| 225 | Patient074E  | Patient145C |
| 225 | Patient099B  | Patient246C |
| 225 | Patient099D  | Patient246A |
| 225 | Patient103A  | Patient217C |
| 225 | Patient141B  | Patient145A |
| 225 | Patient145A  | Patient261G |
| 225 | Patient192B  | Patient251  |
| 225 | Patient196A  | Patient247A |
| 225 | Patient196C  | Patient246D |
| 225 | Patient196C  | Patient247A |
| 225 | Patient201E  | Patient246C |
| 225 | Patient217J  | Patient224A |
| 225 | Patient222D  | Patient247C |
| 225 | Patient222E  | Patient247C |
| 225 | Patient222F  | Patient247C |
| 226 | Patient028   | Patient246B |
| 226 | Patient034B  | Patient217B |
| 226 | Patient034B  | Patient217E |
| 226 | Patient034B  | Patient217H |
| 226 | Patient034D  | Patient217A |
| 226 | Patient034E  | Patient217A |
| 226 | Patient034E  | Patient217F |
| 226 | Patient045D  | Patient246E |
| 226 | Patient066D  | Patient141C |
| 226 | Patient066E  | Patient074C |
| 226 | Patient097A  | Patient247D |
| 226 | Patient104B  | Patient246D |
| 226 | Patient108B2 | Patient247D |
| 226 | Patient131   | Patient246B |
| 226 | Patient141D  | Patient195  |
| 226 | Patient145C  | Patient230B |
| 226 | Patient145C  | Patient230F |
| 226 | Patient157   | Patient246C |
| 226 | Patient196A  | Patient247C |
| 226 | Patient222B  | Patient246D |
| 226 | Patient222C  | Patient247E |
| 226 | Patient222E  | Patient247A |
| 226 | Patient222F  | Patient247B |
| 226 | Patient236B  | Patient247D |
| 226 | Patient247E  | Patient263A |
| 227 | Patient028   | Patient246E |
| 227 | Patient034B  | Patient217F |
| 227 | Patient034C  | Patient217B |

|     |              |             |
|-----|--------------|-------------|
| 227 | Patient034C  | Patient217E |
| 227 | Patient034C  | Patient217H |
| 227 | Patient034E  | Patient145A |
| 227 | Patient045D  | Patient246B |
| 227 | Patient066D  | Patient141B |
| 227 | Patient066E  | Patient181A |
| 227 | Patient066F  | Patient074C |
| 227 | Patient081A1 | Patient145C |
| 227 | Patient081B  | Patient145C |
| 227 | Patient099E  | Patient246C |
| 227 | Patient103A  | Patient217D |
| 227 | Patient104B  | Patient247B |
| 227 | Patient108B1 | Patient247D |
| 227 | Patient126E  | Patient247E |
| 227 | Patient131   | Patient246E |
| 227 | Patient196B  | Patient247E |
| 227 | Patient196C  | Patient247C |
| 227 | Patient196E  | Patient246D |
| 227 | Patient196E  | Patient247B |
| 227 | Patient201B  | Patient246B |
| 227 | Patient201B  | Patient246E |
| 227 | Patient218B  | Patient246E |
| 227 | Patient222B  | Patient247A |
| 227 | Patient222B  | Patient247B |
| 228 | Patient032A  | Patient217J |
| 228 | Patient034B  | Patient145A |
| 228 | Patient034B  | Patient217A |
| 228 | Patient081A2 | Patient145C |
| 228 | Patient097B  | Patient247D |
| 228 | Patient099D  | Patient246C |
| 228 | Patient100A  | Patient246B |
| 228 | Patient103A  | Patient217B |
| 228 | Patient103A  | Patient217E |
| 228 | Patient103A  | Patient217F |
| 228 | Patient104B  | Patient247A |
| 228 | Patient104B  | Patient247C |
| 228 | Patient145A  | Patient181A |
| 228 | Patient187   | Patient247E |
| 228 | Patient196A  | Patient247E |
| 228 | Patient196C  | Patient247B |
| 228 | Patient196E  | Patient247A |
| 228 | Patient196E  | Patient247C |
| 228 | Patient196F  | Patient247E |
| 228 | Patient222A  | Patient247A |
| 228 | Patient222A  | Patient247B |
| 228 | Patient222A  | Patient247C |
| 228 | Patient222A  | Patient247E |
| 228 | Patient222B  | Patient247C |
| 228 | Patient232A  | Patient246A |
| 228 | Patient232C  | Patient246A |



|     |             |             |
|-----|-------------|-------------|
| 228 | Patient247E | Patient263B |
| 229 | Patient032B | Patient217I |
| 229 | Patient032E | Patient217C |
| 229 | Patient034C | Patient217A |
| 229 | Patient034C | Patient217F |
| 229 | Patient034D | Patient145A |
| 229 | Patient066D | Patient181B |
| 229 | Patient066F | Patient181A |
| 229 | Patient099A | Patient246B |
| 229 | Patient099B | Patient246B |
| 229 | Patient099C | Patient246C |
| 229 | Patient100A | Patient246E |
| 229 | Patient103A | Patient217A |
| 229 | Patient103A | Patient217H |
| 229 | Patient104B | Patient247E |
| 229 | Patient126D | Patient246E |
| 229 | Patient222D | Patient247B |
| 229 | Patient236A | Patient247D |
| 230 | Patient032E | Patient217D |
| 230 | Patient034A | Patient217I |
| 230 | Patient066E | Patient141C |
| 230 | Patient074B | Patient224B |
| 230 | Patient081E | Patient145C |
| 230 | Patient081F | Patient145C |
| 230 | Patient097C | Patient247D |
| 230 | Patient099A | Patient246E |
| 230 | Patient103B | Patient181A |
| 230 | Patient126D | Patient246B |
| 230 | Patient141A | Patient145A |
| 230 | Patient157  | Patient247C |
| 230 | Patient187  | Patient247D |
| 230 | Patient201A | Patient246B |
| 230 | Patient218A | Patient246D |
| 230 | Patient222E | Patient247B |
| 230 | Patient232B | Patient246C |
| 230 | Patient232E | Patient246A |
| 231 | Patient023  | Patient252D |
| 231 | Patient028  | Patient247A |
| 231 | Patient032D | Patient195  |
| 231 | Patient034C | Patient145A |
| 231 | Patient045D | Patient246D |
| 231 | Patient066D | Patient074D |
| 231 | Patient066E | Patient141B |
| 231 | Patient074D | Patient145A |
| 231 | Patient103C | Patient181B |
| 231 | Patient104A | Patient246D |
| 231 | Patient141G | Patient217C |
| 231 | Patient149B | Patient247D |
| 231 | Patient157  | Patient247A |
| 231 | Patient157  | Patient247B |

|     |              |             |
|-----|--------------|-------------|
| 231 | Patient196C  | Patient247E |
| 231 | Patient196D  | Patient247A |
| 231 | Patient196D  | Patient247C |
| 231 | Patient201A  | Patient246E |
| 231 | Patient201E  | Patient246B |
| 231 | Patient222D  | Patient247E |
| 231 | Patient222E  | Patient247E |
| 231 | Patient222F  | Patient247E |
| 231 | Patient232D  | Patient246A |
| 231 | Patient247D  | Patient265  |
| 232 | Patient021A2 | Patient252D |
| 232 | Patient032E  | Patient217B |
| 232 | Patient032E  | Patient217E |
| 232 | Patient032E  | Patient217H |
| 232 | Patient045D  | Patient247A |
| 232 | Patient045D  | Patient247C |
| 232 | Patient066D  | Patient141A |
| 232 | Patient066F  | Patient141B |
| 232 | Patient066F  | Patient141C |
| 232 | Patient074A  | Patient224B |
| 232 | Patient097E  | Patient247D |
| 232 | Patient099B  | Patient246E |
| 232 | Patient103B  | Patient145A |
| 232 | Patient104A  | Patient247C |
| 232 | Patient131   | Patient246D |
| 232 | Patient141G  | Patient217D |
| 232 | Patient196E  | Patient247E |
| 232 | Patient218B  | Patient246D |
| 232 | Patient222B  | Patient247E |
| 233 | Patient021A2 | Patient093E |
| 233 | Patient032B  | Patient217J |
| 233 | Patient032C  | Patient217C |
| 233 | Patient032E  | Patient217A |
| 233 | Patient032E  | Patient217F |
| 233 | Patient034D  | Patient217I |
| 233 | Patient034E  | Patient217I |
| 233 | Patient099E  | Patient246B |
| 233 | Patient099E  | Patient246E |
| 233 | Patient104A  | Patient247A |
| 233 | Patient104A  | Patient247E |
| 233 | Patient141G  | Patient217B |
| 233 | Patient196D  | Patient247B |
| 233 | Patient201B  | Patient246D |
| 233 | Patient218B  | Patient247B |
| 233 | Patient232D  | Patient246C |
| 233 | Patient232E  | Patient246C |
| 234 | Patient023   | Patient126E |
| 234 | Patient028   | Patient246D |
| 234 | Patient028   | Patient247C |
| 234 | Patient032C  | Patient217F |

|     |              |              |
|-----|--------------|--------------|
| 234 | Patient032E  | Patient081B  |
| 234 | Patient034A  | Patient217J  |
| 234 | Patient034B  | Patient217I  |
| 234 | Patient034C  | Patient217I  |
| 234 | Patient045D  | Patient247B  |
| 234 | Patient066D  | Patient230D  |
| 234 | Patient103A  | Patient145A  |
| 234 | Patient103D  | Patient141C  |
| 234 | Patient104A  | Patient247B  |
| 234 | Patient104B  | Patient247D  |
| 234 | Patient141F  | Patient217C  |
| 234 | Patient141G  | Patient217A  |
| 234 | Patient141G  | Patient217E  |
| 234 | Patient141G  | Patient217H  |
| 234 | Patient157   | Patient246B  |
| 234 | Patient201E  | Patient246E  |
| 234 | Patient218A  | Patient247B  |
| 234 | Patient218B  | Patient247A  |
| 234 | Patient218B  | Patient247C  |
| 234 | Patient232A  | Patient246C  |
| 235 | Patient021A2 | Patient093B  |
| 235 | Patient021A2 | Patient094A  |
| 235 | Patient028   | Patient247B  |
| 235 | Patient032A  | Patient195   |
| 235 | Patient032C  | Patient217D  |
| 235 | Patient032D  | Patient081C  |
| 235 | Patient032E  | Patient081A1 |
| 235 | Patient032E  | Patient081A2 |
| 235 | Patient034D  | Patient217J  |
| 235 | Patient045A  | Patient192E  |
| 235 | Patient099C  | Patient246B  |
| 235 | Patient099C  | Patient246E  |
| 235 | Patient099D  | Patient246B  |
| 235 | Patient141F  | Patient217D  |
| 235 | Patient141G  | Patient217F  |
| 235 | Patient145A  | Patient230A  |
| 235 | Patient150A  | Patient251   |
| 235 | Patient150B  | Patient251   |
| 235 | Patient150C  | Patient251   |
| 235 | Patient196B  | Patient247D  |
| 235 | Patient196F  | Patient247D  |
| 235 | Patient218A  | Patient247A  |
| 235 | Patient218A  | Patient247C  |
| 235 | Patient232C  | Patient246C  |
| 236 | Patient021A1 | Patient093E  |
| 236 | Patient021A2 | Patient093D  |
| 236 | Patient023   | Patient184   |
| 236 | Patient028   | Patient247E  |
| 236 | Patient032C  | Patient217E  |
| 236 | Patient032D  | Patient081D  |

|     |              |             |
|-----|--------------|-------------|
| 236 | Patient045B  | Patient192E |
| 236 | Patient066D  | Patient103D |
| 236 | Patient066E  | Patient074D |
| 236 | Patient066F  | Patient074D |
| 236 | Patient074C  | Patient224B |
| 236 | Patient126D  | Patient246D |
| 236 | Patient141F  | Patient217B |
| 236 | Patient232B  | Patient246B |
| 236 | Patient232E  | Patient246B |
| 236 | Patient247D  | Patient263A |
| 236 | Patient247D  | Patient263B |
| 237 | Patient021A1 | Patient093B |
| 237 | Patient021A1 | Patient252D |
| 237 | Patient021A2 | Patient093C |
| 237 | Patient021A2 | Patient222C |
| 237 | Patient023   | Patient127A |
| 237 | Patient032C  | Patient217B |
| 237 | Patient032C  | Patient217H |
| 237 | Patient032E  | Patient081D |
| 237 | Patient032E  | Patient217I |
| 237 | Patient034E  | Patient217J |
| 237 | Patient045A  | Patient192F |
| 237 | Patient066D  | Patient074E |
| 237 | Patient066E  | Patient181B |
| 237 | Patient074E  | Patient145A |
| 237 | Patient099D  | Patient246E |
| 237 | Patient100A  | Patient247B |
| 237 | Patient103A  | Patient217I |
| 237 | Patient103D  | Patient141B |
| 237 | Patient103D  | Patient141D |
| 237 | Patient103D  | Patient141G |
| 237 | Patient141F  | Patient217A |
| 237 | Patient141F  | Patient217E |
| 237 | Patient141F  | Patient217F |
| 237 | Patient141F  | Patient217H |
| 237 | Patient145A  | Patient181B |
| 237 | Patient145A  | Patient230E |
| 237 | Patient145C  | Patient230D |
| 237 | Patient157   | Patient246E |
| 237 | Patient201B  | Patient247C |
| 237 | Patient218A  | Patient247E |
| 237 | Patient232A  | Patient246B |
| 237 | Patient232B  | Patient246E |
| 238 | Patient021A2 | Patient093A |
| 238 | Patient023   | Patient187  |
| 238 | Patient032C  | Patient217A |
| 238 | Patient032E  | Patient081E |
| 238 | Patient032E  | Patient081F |
| 238 | Patient034B  | Patient217J |
| 238 | Patient045C  | Patient192E |

|     |              |              |
|-----|--------------|--------------|
| 238 | Patient045D  | Patient247E  |
| 238 | Patient066E  | Patient103D  |
| 238 | Patient066E  | Patient141A  |
| 238 | Patient066F  | Patient181B  |
| 238 | Patient081C  | Patient145C  |
| 238 | Patient081D  | Patient145C  |
| 238 | Patient100A  | Patient246D  |
| 238 | Patient100A  | Patient247A  |
| 238 | Patient100A  | Patient247C  |
| 238 | Patient103D  | Patient224B  |
| 238 | Patient131   | Patient247C  |
| 238 | Patient145A  | Patient230F  |
| 238 | Patient157   | Patient246D  |
| 238 | Patient192F  | Patient251   |
| 238 | Patient196A  | Patient247D  |
| 238 | Patient196C  | Patient247D  |
| 238 | Patient201E  | Patient246D  |
| 238 | Patient222C  | Patient247D  |
| 238 | Patient232D  | Patient246B  |
| 239 | Patient021A1 | Patient093D  |
| 239 | Patient021A1 | Patient159   |
| 239 | Patient021A2 | Patient159   |
| 239 | Patient023   | Patient045D  |
| 239 | Patient032B  | Patient195   |
| 239 | Patient032D  | Patient081A1 |
| 239 | Patient032E  | Patient081C  |
| 239 | Patient045B  | Patient192F  |
| 239 | Patient045C  | Patient192F  |
| 239 | Patient066E  | Patient230D  |
| 239 | Patient066F  | Patient141A  |
| 239 | Patient074B  | Patient141B  |
| 239 | Patient103A  | Patient217J  |
| 239 | Patient103E  | Patient141C  |
| 239 | Patient104A  | Patient247D  |
| 239 | Patient126E  | Patient247D  |
| 239 | Patient131   | Patient247B  |
| 239 | Patient145A  | Patient230B  |
| 239 | Patient177   | Patient192D  |
| 239 | Patient192E  | Patient251   |
| 239 | Patient201A  | Patient246D  |
| 239 | Patient201A  | Patient247A  |
| 239 | Patient201A  | Patient247C  |
| 239 | Patient201B  | Patient247A  |
| 239 | Patient201B  | Patient247B  |
| 239 | Patient217C  | Patient224B  |
| 239 | Patient218B  | Patient247E  |
| 239 | Patient222F  | Patient247D  |
| 239 | Patient232D  | Patient246E  |
| 239 | Patient232E  | Patient246E  |
| 240 | Patient021A1 | Patient093A  |

|     |              |              |
|-----|--------------|--------------|
| 240 | Patient021A1 | Patient093C  |
| 240 | Patient021A1 | Patient094A  |
| 240 | Patient021A1 | Patient222C  |
| 240 | Patient021A2 | Patient222B  |
| 240 | Patient032D  | Patient081B  |
| 240 | Patient034C  | Patient217J  |
| 240 | Patient074B  | Patient141C  |
| 240 | Patient081A1 | Patient145A  |
| 240 | Patient081B  | Patient145A  |
| 240 | Patient092C  | Patient150A  |
| 240 | Patient099A  | Patient247C  |
| 240 | Patient099B  | Patient246D  |
| 240 | Patient103B  | Patient181B  |
| 240 | Patient126D  | Patient247A  |
| 240 | Patient126D  | Patient247C  |
| 240 | Patient131   | Patient247A  |
| 240 | Patient157   | Patient247D  |
| 240 | Patient201A  | Patient247B  |
| 240 | Patient201E  | Patient247C  |
| 240 | Patient217D  | Patient224B  |
| 240 | Patient232A  | Patient246E  |
| 240 | Patient232C  | Patient246B  |
| 241 | Patient021A2 | Patient126E  |
| 241 | Patient023   | Patient127B  |
| 241 | Patient032C  | Patient081B  |
| 241 | Patient032D  | Patient081A2 |
| 241 | Patient034A  | Patient195   |
| 241 | Patient034D  | Patient195   |
| 241 | Patient066E  | Patient074E  |
| 241 | Patient066F  | Patient230D  |
| 241 | Patient081A2 | Patient145A  |
| 241 | Patient092A  | Patient150A  |
| 241 | Patient092C  | Patient150B  |
| 241 | Patient099A  | Patient247A  |
| 241 | Patient099A  | Patient247B  |
| 241 | Patient099E  | Patient247A  |
| 241 | Patient103D  | Patient141A  |
| 241 | Patient103D  | Patient141F  |
| 241 | Patient103E  | Patient141B  |
| 241 | Patient103E  | Patient141D  |
| 241 | Patient103E  | Patient141G  |
| 241 | Patient126D  | Patient247B  |
| 241 | Patient141B  | Patient181A  |
| 241 | Patient141C  | Patient181A  |
| 241 | Patient141G  | Patient217I  |
| 241 | Patient149A  | Patient247D  |
| 241 | Patient196E  | Patient247D  |
| 241 | Patient201B  | Patient247E  |
| 241 | Patient201E  | Patient247A  |
| 241 | Patient201E  | Patient247B  |

|     |              |              |
|-----|--------------|--------------|
| 241 | Patient218A  | Patient247D  |
| 242 | Patient021A1 | Patient222B  |
| 242 | Patient021A2 | Patient094B  |
| 242 | Patient021A2 | Patient184   |
| 242 | Patient023   | Patient218A  |
| 242 | Patient032C  | Patient081A1 |
| 242 | Patient032C  | Patient081A2 |
| 242 | Patient032C  | Patient217I  |
| 242 | Patient032D  | Patient081E  |
| 242 | Patient034B  | Patient195   |
| 242 | Patient066D  | Patient103E  |
| 242 | Patient066F  | Patient074E  |
| 242 | Patient066F  | Patient103D  |
| 242 | Patient074A  | Patient141C  |
| 242 | Patient099A  | Patient246D  |
| 242 | Patient099B  | Patient247B  |
| 242 | Patient099E  | Patient246D  |
| 242 | Patient099E  | Patient247C  |
| 242 | Patient100A  | Patient247E  |
| 242 | Patient141F  | Patient217I  |
| 242 | Patient217A  | Patient224B  |
| 242 | Patient217B  | Patient224B  |
| 242 | Patient217E  | Patient224B  |
| 242 | Patient217F  | Patient224B  |
| 242 | Patient217H  | Patient224B  |
| 242 | Patient218B  | Patient247D  |
| 242 | Patient222E  | Patient247D  |
| 243 | Patient021A1 | Patient094B  |
| 243 | Patient021A1 | Patient126E  |
| 243 | Patient021A2 | Patient094D  |
| 243 | Patient021A2 | Patient187   |
| 243 | Patient021A2 | Patient222F  |
| 243 | Patient032C  | Patient081D  |
| 243 | Patient032C  | Patient081F  |
| 243 | Patient032D  | Patient081F  |
| 243 | Patient034E  | Patient195   |
| 243 | Patient045D  | Patient247D  |
| 243 | Patient074A  | Patient141B  |
| 243 | Patient074D  | Patient224B  |
| 243 | Patient081E  | Patient145A  |
| 243 | Patient081F  | Patient145A  |
| 243 | Patient092A  | Patient150B  |
| 243 | Patient092A  | Patient150C  |
| 243 | Patient092B  | Patient150A  |
| 243 | Patient092B  | Patient150B  |
| 243 | Patient092C  | Patient150C  |
| 243 | Patient092E  | Patient150A  |
| 243 | Patient099B  | Patient247A  |
| 243 | Patient099B  | Patient247C  |
| 243 | Patient103D  | Patient224A  |

|     |              |             |
|-----|--------------|-------------|
| 243 | Patient103D  | Patient230G |
| 243 | Patient157   | Patient247E |
| 243 | Patient222B  | Patient247D |
| 243 | Patient232B  | Patient246D |
| 243 | Patient232C  | Patient246E |
| 244 | Patient021A1 | Patient184  |
| 244 | Patient032E  | Patient217J |
| 244 | Patient092B  | Patient150C |
| 244 | Patient092D  | Patient150A |
| 244 | Patient092E  | Patient150B |
| 244 | Patient099A  | Patient247E |
| 244 | Patient099C  | Patient247A |
| 244 | Patient099C  | Patient247C |
| 244 | Patient099E  | Patient247B |
| 244 | Patient100A  | Patient247D |
| 244 | Patient103E  | Patient224B |
| 244 | Patient131   | Patient247E |
| 244 | Patient150A  | Patient235B |
| 244 | Patient150A  | Patient235C |
| 244 | Patient201A  | Patient247E |
| 244 | Patient222A  | Patient247D |
| 244 | Patient222D  | Patient247D |
| 245 | Patient021A1 | Patient187  |
| 245 | Patient021A2 | Patient222A |
| 245 | Patient023   | Patient218B |
| 245 | Patient032C  | Patient081C |
| 245 | Patient032C  | Patient081E |
| 245 | Patient034C  | Patient195  |
| 245 | Patient074B  | Patient141A |
| 245 | Patient081A2 | Patient230G |
| 245 | Patient092D  | Patient150B |
| 245 | Patient092E  | Patient150C |
| 245 | Patient099B  | Patient247E |
| 245 | Patient099C  | Patient246D |
| 245 | Patient099C  | Patient247B |
| 245 | Patient099D  | Patient246D |
| 245 | Patient099D  | Patient247C |
| 245 | Patient103E  | Patient141A |
| 245 | Patient141A  | Patient181A |
| 245 | Patient150B  | Patient235B |
| 245 | Patient150B  | Patient235C |
| 245 | Patient196D  | Patient247D |
| 246 | Patient021A1 | Patient222F |
| 246 | Patient021A2 | Patient094C |
| 246 | Patient021A2 | Patient094E |
| 246 | Patient021A2 | Patient127A |
| 246 | Patient023   | Patient246A |
| 246 | Patient026C  | Patient145B |
| 246 | Patient026C  | Patient181A |
| 246 | Patient028   | Patient247D |



|     |              |             |
|-----|--------------|-------------|
| 246 | Patient032A  | Patient081D |
| 246 | Patient032D  | Patient103D |
| 246 | Patient032E  | Patient103D |
| 246 | Patient066E  | Patient103E |
| 246 | Patient074C  | Patient141C |
| 246 | Patient081A1 | Patient261E |
| 246 | Patient081B  | Patient230G |
| 246 | Patient099A  | Patient247D |
| 246 | Patient103E  | Patient141F |
| 246 | Patient126D  | Patient247E |
| 246 | Patient141G  | Patient217J |
| 246 | Patient150C  | Patient235C |
| 246 | Patient196D  | Patient247E |
| 246 | Patient201E  | Patient247E |
| 246 | Patient232C  | Patient246D |
| 246 | Patient232D  | Patient246D |
| 247 | Patient021A1 | Patient094D |
| 247 | Patient021A1 | Patient222E |
| 247 | Patient021A2 | Patient222E |
| 247 | Patient032A  | Patient081C |
| 247 | Patient032C  | Patient217J |
| 247 | Patient074C  | Patient141B |
| 247 | Patient081A1 | Patient230G |
| 247 | Patient081B  | Patient261E |
| 247 | Patient099D  | Patient247A |
| 247 | Patient103D  | Patient261C |
| 247 | Patient103D  | Patient261E |
| 247 | Patient232A  | Patient246D |
| 248 | Patient021A1 | Patient094C |
| 248 | Patient021A1 | Patient127A |
| 248 | Patient021A1 | Patient222A |
| 248 | Patient021A2 | Patient236B |
| 248 | Patient023   | Patient220A |
| 248 | Patient074B  | Patient230A |
| 248 | Patient074E  | Patient224B |
| 248 | Patient081A1 | Patient261C |
| 248 | Patient081A2 | Patient261E |
| 248 | Patient092D  | Patient150C |
| 248 | Patient092G  | Patient150A |
| 248 | Patient092H  | Patient150A |
| 248 | Patient099D  | Patient247B |
| 248 | Patient099E  | Patient247E |
| 248 | Patient103E  | Patient224A |
| 248 | Patient141F  | Patient217J |
| 248 | Patient150C  | Patient235B |
| 248 | Patient232B  | Patient247A |
| 248 | Patient232B  | Patient247C |
| 248 | Patient232E  | Patient246D |
| 249 | Patient021A2 | Patient196A |
| 249 | Patient032C  | Patient103D |

|     |              |              |
|-----|--------------|--------------|
| 249 | Patient066F  | Patient103E  |
| 249 | Patient074A  | Patient141A  |
| 249 | Patient081B  | Patient261C  |
| 249 | Patient081C  | Patient230G  |
| 249 | Patient092G  | Patient150B  |
| 249 | Patient092H  | Patient150B  |
| 249 | Patient099B  | Patient247D  |
| 249 | Patient099C  | Patient247E  |
| 249 | Patient099E  | Patient247D  |
| 249 | Patient103E  | Patient230G  |
| 249 | Patient141B  | Patient181B  |
| 249 | Patient141C  | Patient181B  |
| 249 | Patient145A  | Patient230D  |
| 250 | Patient021A1 | Patient094E  |
| 250 | Patient021A1 | Patient127B  |
| 250 | Patient021A2 | Patient127B  |
| 250 | Patient021A2 | Patient196B  |
| 250 | Patient026C  | Patient145C  |
| 250 | Patient032A  | Patient081B  |
| 250 | Patient032A  | Patient103D  |
| 250 | Patient032B  | Patient081D  |
| 250 | Patient032D  | Patient103E  |
| 250 | Patient032E  | Patient103E  |
| 250 | Patient081A1 | Patient141G  |
| 250 | Patient081A2 | Patient141G  |
| 250 | Patient081A2 | Patient261C  |
| 250 | Patient081B  | Patient141G  |
| 250 | Patient081C  | Patient261E  |
| 250 | Patient081D  | Patient230G  |
| 250 | Patient081D  | Patient261E  |
| 250 | Patient092H  | Patient150C  |
| 250 | Patient103D  | Patient230C  |
| 250 | Patient217I  | Patient224B  |
| 250 | Patient232A  | Patient247A  |
| 250 | Patient232B  | Patient247B  |
| 251 | Patient021A1 | Patient196A  |
| 251 | Patient021A1 | Patient236B  |
| 251 | Patient021A2 | Patient196F  |
| 251 | Patient021A2 | Patient218A  |
| 251 | Patient026C  | Patient230D  |
| 251 | Patient032A  | Patient081A1 |
| 251 | Patient032A  | Patient081A2 |
| 251 | Patient032B  | Patient081C  |
| 251 | Patient074A  | Patient103D  |
| 251 | Patient074A  | Patient230A  |
| 251 | Patient074B  | Patient103D  |
| 251 | Patient081C  | Patient141D  |
| 251 | Patient081C  | Patient145A  |
| 251 | Patient081D  | Patient145A  |
| 251 | Patient081E  | Patient261C  |

|     |              |             |
|-----|--------------|-------------|
| 251 | Patient081E  | Patient261E |
| 251 | Patient099C  | Patient247D |
| 251 | Patient099D  | Patient247E |
| 251 | Patient232A  | Patient247B |
| 251 | Patient232A  | Patient247C |
| 251 | Patient232C  | Patient247C |
| 251 | Patient232D  | Patient247A |
| 252 | Patient023   | Patient196A |
| 252 | Patient023   | Patient196B |
| 252 | Patient034A  | Patient081C |
| 252 | Patient034A  | Patient081D |
| 252 | Patient034D  | Patient081D |
| 252 | Patient034E  | Patient081C |
| 252 | Patient081A1 | Patient141F |
| 252 | Patient081A1 | Patient230C |
| 252 | Patient081B  | Patient141F |
| 252 | Patient081C  | Patient141G |
| 252 | Patient081C  | Patient261C |
| 252 | Patient081D  | Patient261C |
| 252 | Patient081E  | Patient141G |
| 252 | Patient081E  | Patient230G |
| 252 | Patient081F  | Patient230G |
| 252 | Patient081F  | Patient261C |
| 252 | Patient092G  | Patient150C |
| 252 | Patient103E  | Patient261E |
| 252 | Patient232C  | Patient247A |
| 252 | Patient232D  | Patient247C |
| 253 | Patient021A1 | Patient218A |
| 253 | Patient021A2 | Patient218B |
| 253 | Patient023   | Patient236B |
| 253 | Patient032A  | Patient081F |
| 253 | Patient034B  | Patient081C |
| 253 | Patient034B  | Patient081D |
| 253 | Patient034D  | Patient081C |
| 253 | Patient034E  | Patient081D |
| 253 | Patient074B  | Patient224A |
| 253 | Patient074B  | Patient230F |
| 253 | Patient074C  | Patient141A |
| 253 | Patient074D  | Patient141B |
| 253 | Patient074D  | Patient141C |
| 253 | Patient081A2 | Patient141F |
| 253 | Patient081A2 | Patient230C |
| 253 | Patient081B  | Patient230C |
| 253 | Patient081C  | Patient141F |
| 253 | Patient081D  | Patient141D |
| 253 | Patient081D  | Patient141G |
| 253 | Patient081F  | Patient261E |
| 253 | Patient099D  | Patient247D |
| 253 | Patient103E  | Patient261C |
| 253 | Patient141A  | Patient181B |

|     |              |              |
|-----|--------------|--------------|
| 253 | Patient179   | Patient238   |
| 253 | Patient217J  | Patient224B  |
| 253 | Patient232C  | Patient247B  |
| 253 | Patient232E  | Patient247B  |
| 253 | Patient232E  | Patient247C  |
| 254 | Patient021A1 | Patient196B  |
| 254 | Patient021A1 | Patient218B  |
| 254 | Patient021A2 | Patient149B  |
| 254 | Patient021A2 | Patient236A  |
| 254 | Patient026C  | Patient181B  |
| 254 | Patient032A  | Patient081E  |
| 254 | Patient032A  | Patient103E  |
| 254 | Patient032B  | Patient081B  |
| 254 | Patient074B  | Patient230D  |
| 254 | Patient074C  | Patient103D  |
| 254 | Patient081E  | Patient141F  |
| 254 | Patient081F  | Patient141G  |
| 254 | Patient131   | Patient247D  |
| 254 | Patient201A  | Patient247D  |
| 254 | Patient201B  | Patient247D  |
| 254 | Patient232D  | Patient247B  |
| 254 | Patient232E  | Patient247A  |
| 255 | Patient021A1 | Patient196F  |
| 255 | Patient021A2 | Patient099B  |
| 255 | Patient021A2 | Patient196E  |
| 255 | Patient023   | Patient222A  |
| 255 | Patient023   | Patient222F  |
| 255 | Patient032B  | Patient081A1 |
| 255 | Patient032B  | Patient081A2 |
| 255 | Patient032B  | Patient103D  |
| 255 | Patient032C  | Patient103E  |
| 255 | Patient034A  | Patient081A1 |
| 255 | Patient034A  | Patient103D  |
| 255 | Patient074A  | Patient224A  |
| 255 | Patient074B  | Patient103E  |
| 255 | Patient074C  | Patient230A  |
| 255 | Patient081A1 | Patient261G  |
| 255 | Patient081E  | Patient230C  |
| 255 | Patient081F  | Patient141F  |
| 255 | Patient103E  | Patient230C  |
| 255 | Patient126D  | Patient247D  |
| 255 | Patient232D  | Patient247E  |
| 256 | Patient021A1 | Patient236A  |
| 256 | Patient021A2 | Patient099A  |
| 256 | Patient021A2 | Patient196C  |
| 256 | Patient023   | Patient222B  |
| 256 | Patient026C  | Patient066D  |
| 256 | Patient034A  | Patient081B  |
| 256 | Patient034C  | Patient081D  |
| 256 | Patient034E  | Patient103D  |

|     |              |              |
|-----|--------------|--------------|
| 256 | Patient081A2 | Patient141D  |
| 256 | Patient081B  | Patient141D  |
| 256 | Patient081B  | Patient261G  |
| 256 | Patient081C  | Patient230C  |
| 256 | Patient081D  | Patient141F  |
| 256 | Patient081D  | Patient230C  |
| 256 | Patient103D  | Patient181A  |
| 256 | Patient232A  | Patient247E  |
| 256 | Patient232B  | Patient247D  |
| 256 | Patient232B  | Patient247E  |
| 257 | Patient021A1 | Patient099B  |
| 257 | Patient021A1 | Patient149B  |
| 257 | Patient021A1 | Patient265   |
| 257 | Patient021A2 | Patient265   |
| 257 | Patient023   | Patient099B  |
| 257 | Patient023   | Patient222E  |
| 257 | Patient023   | Patient236A  |
| 257 | Patient032B  | Patient081F  |
| 257 | Patient034A  | Patient081A2 |
| 257 | Patient034C  | Patient081C  |
| 257 | Patient034D  | Patient103D  |
| 257 | Patient034E  | Patient081A1 |
| 257 | Patient074A  | Patient103E  |
| 257 | Patient074A  | Patient230D  |
| 257 | Patient074A  | Patient230F  |
| 257 | Patient081A1 | Patient141D  |
| 257 | Patient081A2 | Patient261G  |
| 257 | Patient081F  | Patient230C  |
| 257 | Patient103D  | Patient261G  |
| 257 | Patient145B  | Patient217C  |
| 257 | Patient150A  | Patient235A  |
| 257 | Patient201E  | Patient247D  |
| 257 | Patient232E  | Patient247E  |
| 258 | Patient021A1 | Patient099A  |
| 258 | Patient021A2 | Patient099E  |
| 258 | Patient021A2 | Patient220A  |
| 258 | Patient023   | Patient099A  |
| 258 | Patient023   | Patient196C  |
| 258 | Patient023   | Patient196E  |
| 258 | Patient032B  | Patient081E  |
| 258 | Patient034A  | Patient081E  |
| 258 | Patient034B  | Patient081A1 |
| 258 | Patient034B  | Patient081B  |
| 258 | Patient034B  | Patient103D  |
| 258 | Patient034D  | Patient081B  |
| 258 | Patient034E  | Patient081B  |
| 258 | Patient074B  | Patient230B  |
| 258 | Patient074C  | Patient224A  |
| 258 | Patient074D  | Patient141A  |
| 258 | Patient081C  | Patient261B  |

|     |              |              |
|-----|--------------|--------------|
| 258 | Patient081D  | Patient261B  |
| 258 | Patient081E  | Patient261G  |
| 258 | Patient092C  | Patient177   |
| 258 | Patient103C  | Patient141C  |
| 258 | Patient103D  | Patient230A  |
| 258 | Patient145B  | Patient217D  |
| 258 | Patient150B  | Patient235A  |
| 258 | Patient150C  | Patient235A  |
| 258 | Patient232C  | Patient247E  |
| 259 | Patient021A1 | Patient196E  |
| 259 | Patient023   | Patient247C  |
| 259 | Patient032B  | Patient103E  |
| 259 | Patient034A  | Patient081F  |
| 259 | Patient034A  | Patient103E  |
| 259 | Patient034B  | Patient081A2 |
| 259 | Patient034D  | Patient081A1 |
| 259 | Patient034D  | Patient081A2 |
| 259 | Patient034D  | Patient081F  |
| 259 | Patient034E  | Patient081A2 |
| 259 | Patient074E  | Patient141B  |
| 259 | Patient081C  | Patient261A  |
| 259 | Patient081C  | Patient261G  |
| 259 | Patient081D  | Patient261A  |
| 259 | Patient081D  | Patient261G  |
| 259 | Patient081F  | Patient141D  |
| 259 | Patient097A  | Patient126D  |
| 259 | Patient145B  | Patient217B  |
| 259 | Patient145C  | Patient195   |
| 259 | Patient232D  | Patient247D  |
| 260 | Patient021A1 | Patient099E  |
| 260 | Patient021A1 | Patient196C  |
| 260 | Patient021A1 | Patient220A  |
| 260 | Patient021A1 | Patient222D  |
| 260 | Patient021A1 | Patient263A  |
| 260 | Patient021A2 | Patient222D  |
| 260 | Patient021A2 | Patient263A  |
| 260 | Patient023   | Patient247B  |
| 260 | Patient023   | Patient265   |
| 260 | Patient034C  | Patient081B  |
| 260 | Patient034E  | Patient081E  |
| 260 | Patient034E  | Patient103E  |
| 260 | Patient074B  | Patient230E  |
| 260 | Patient074C  | Patient230F  |
| 260 | Patient074E  | Patient141C  |
| 260 | Patient081E  | Patient141D  |
| 260 | Patient081F  | Patient261G  |
| 260 | Patient092A  | Patient177   |
| 260 | Patient103C  | Patient141B  |
| 260 | Patient145B  | Patient217A  |
| 260 | Patient145B  | Patient217E  |

|     |              |              |
|-----|--------------|--------------|
| 260 | Patient145B  | Patient217H  |
| 260 | Patient232A  | Patient247D  |
| 260 | Patient232C  | Patient247D  |
| 260 | Patient232E  | Patient247D  |
| 261 | Patient021A2 | Patient099C  |
| 261 | Patient023   | Patient099E  |
| 261 | Patient023   | Patient247A  |
| 261 | Patient034B  | Patient081E  |
| 261 | Patient034B  | Patient081F  |
| 261 | Patient034C  | Patient081A1 |
| 261 | Patient034C  | Patient081A2 |
| 261 | Patient034E  | Patient081F  |
| 261 | Patient066D  | Patient217C  |
| 261 | Patient074A  | Patient230B  |
| 261 | Patient074A  | Patient230E  |
| 261 | Patient074C  | Patient103E  |
| 261 | Patient074C  | Patient230D  |
| 261 | Patient074D  | Patient230A  |
| 261 | Patient092D  | Patient177   |
| 261 | Patient103E  | Patient181A  |
| 261 | Patient141C  | Patient217C  |
| 261 | Patient145B  | Patient217F  |
| 261 | Patient149A  | Patient189A  |
| 261 | Patient149A  | Patient189B  |
| 261 | Patient167   | Patient251   |
| 262 | Patient023   | Patient099C  |
| 262 | Patient023   | Patient099D  |
| 262 | Patient026C  | Patient066E  |
| 262 | Patient034B  | Patient103E  |
| 262 | Patient034C  | Patient103D  |
| 262 | Patient034D  | Patient081E  |
| 262 | Patient066D  | Patient217D  |
| 262 | Patient092E  | Patient177   |
| 262 | Patient092H  | Patient177   |
| 262 | Patient103E  | Patient261G  |
| 262 | Patient141C  | Patient217D  |
| 262 | Patient181A  | Patient217C  |
| 263 | Patient021A1 | Patient099C  |
| 263 | Patient021A1 | Patient099D  |
| 263 | Patient021A1 | Patient263B  |
| 263 | Patient026C  | Patient066F  |
| 263 | Patient026C  | Patient145A  |
| 263 | Patient034D  | Patient103E  |
| 263 | Patient066D  | Patient217B  |
| 263 | Patient074D  | Patient103D  |
| 263 | Patient081D  | Patient103A  |
| 263 | Patient103E  | Patient230A  |
| 263 | Patient141C  | Patient217B  |
| 263 | Patient181A  | Patient217D  |
| 263 | Patient213A  | Patient251   |

|     |              |             |
|-----|--------------|-------------|
| 264 | Patient021A2 | Patient099D |
| 264 | Patient021A2 | Patient263B |
| 264 | Patient034C  | Patient081E |
| 264 | Patient034C  | Patient081F |
| 264 | Patient066D  | Patient217E |
| 264 | Patient066D  | Patient217F |
| 264 | Patient066D  | Patient217H |
| 264 | Patient081B  | Patient103A |
| 264 | Patient081C  | Patient103A |
| 264 | Patient092B  | Patient177  |
| 264 | Patient141B  | Patient217C |
| 264 | Patient141C  | Patient217A |
| 264 | Patient141C  | Patient217E |
| 264 | Patient141C  | Patient217F |
| 264 | Patient141C  | Patient217H |
| 264 | Patient145C  | Patient217C |
| 264 | Patient181A  | Patient217B |
| 264 | Patient181A  | Patient217H |
| 264 | Patient217C  | Patient230A |
| 265 | Patient023   | Patient149B |
| 265 | Patient023   | Patient263B |
| 265 | Patient034C  | Patient103E |
| 265 | Patient066D  | Patient217A |
| 265 | Patient074C  | Patient230B |
| 265 | Patient074C  | Patient230E |
| 265 | Patient074D  | Patient224A |
| 265 | Patient074E  | Patient141A |
| 265 | Patient081A1 | Patient103A |
| 265 | Patient081A2 | Patient103A |
| 265 | Patient097C  | Patient126D |
| 265 | Patient103C  | Patient141A |
| 265 | Patient103D  | Patient181B |
| 265 | Patient103D  | Patient230B |
| 265 | Patient141A  | Patient217C |
| 265 | Patient141B  | Patient217D |
| 265 | Patient145B  | Patient217I |
| 265 | Patient145C  | Patient217D |
| 265 | Patient181A  | Patient217E |
| 265 | Patient181A  | Patient217F |
| 265 | Patient217D  | Patient230A |
| 266 | Patient081C  | Patient261D |
| 266 | Patient081D  | Patient261D |
| 266 | Patient092G  | Patient177  |
| 266 | Patient097D  | Patient126D |
| 266 | Patient103B  | Patient141C |
| 266 | Patient103D  | Patient230F |
| 266 | Patient141A  | Patient217D |
| 266 | Patient141B  | Patient217B |
| 266 | Patient145C  | Patient217B |
| 266 | Patient181A  | Patient217A |



|     |              |             |
|-----|--------------|-------------|
| 266 | Patient217B  | Patient230A |
| 266 | Patient217C  | Patient230F |
| 266 | Patient217H  | Patient230A |
| 267 | Patient023   | Patient028  |
| 267 | Patient066E  | Patient217C |
| 267 | Patient066F  | Patient217C |
| 267 | Patient074D  | Patient103E |
| 267 | Patient074D  | Patient230D |
| 267 | Patient074D  | Patient230F |
| 267 | Patient074E  | Patient103D |
| 267 | Patient074E  | Patient230A |
| 267 | Patient081F  | Patient103A |
| 267 | Patient097E  | Patient126D |
| 267 | Patient103B  | Patient141B |
| 267 | Patient141A  | Patient217B |
| 267 | Patient141B  | Patient217A |
| 267 | Patient141B  | Patient217E |
| 267 | Patient141B  | Patient217H |
| 267 | Patient145C  | Patient217E |
| 267 | Patient145C  | Patient217H |
| 267 | Patient149A  | Patient189E |
| 267 | Patient217A  | Patient230A |
| 267 | Patient217C  | Patient230E |
| 267 | Patient217D  | Patient230B |
| 267 | Patient217D  | Patient230F |
| 267 | Patient217E  | Patient230A |
| 268 | Patient021A2 | Patient232B |
| 268 | Patient023   | Patient222C |
| 268 | Patient092C  | Patient213A |
| 268 | Patient103D  | Patient230E |
| 268 | Patient141A  | Patient217A |
| 268 | Patient141A  | Patient217E |
| 268 | Patient141A  | Patient217H |
| 268 | Patient141B  | Patient217F |
| 268 | Patient145C  | Patient217A |
| 268 | Patient145C  | Patient217F |
| 268 | Patient177   | Patient251  |
| 268 | Patient217B  | Patient230B |
| 268 | Patient217B  | Patient230F |
| 268 | Patient217C  | Patient230B |
| 268 | Patient217D  | Patient230E |
| 268 | Patient217F  | Patient230A |
| 269 | Patient021A2 | Patient232A |
| 269 | Patient023   | Patient104B |
| 269 | Patient023   | Patient222D |
| 269 | Patient066E  | Patient217D |
| 269 | Patient066F  | Patient217D |
| 269 | Patient074E  | Patient224A |
| 269 | Patient092A  | Patient213A |
| 269 | Patient097B  | Patient126D |

|     |              |             |
|-----|--------------|-------------|
| 269 | Patient141A  | Patient217F |
| 269 | Patient217A  | Patient230F |
| 269 | Patient217B  | Patient230E |
| 269 | Patient217E  | Patient230F |
| 269 | Patient217H  | Patient230F |
| 270 | Patient021A1 | Patient232B |
| 270 | Patient023   | Patient247D |
| 270 | Patient066E  | Patient217B |
| 270 | Patient066E  | Patient217E |
| 270 | Patient066E  | Patient217F |
| 270 | Patient066F  | Patient217B |
| 270 | Patient066F  | Patient217E |
| 270 | Patient066F  | Patient217F |
| 270 | Patient074D  | Patient230B |
| 270 | Patient081E  | Patient103A |
| 270 | Patient103E  | Patient181B |
| 270 | Patient103E  | Patient230B |
| 270 | Patient103E  | Patient230F |
| 270 | Patient181B  | Patient217C |
| 270 | Patient217A  | Patient230E |
| 270 | Patient217E  | Patient230E |
| 270 | Patient217F  | Patient230E |
| 270 | Patient217F  | Patient230F |
| 270 | Patient217H  | Patient230E |
| 271 | Patient021A1 | Patient232A |
| 271 | Patient021A2 | Patient232E |
| 271 | Patient066D  | Patient103C |
| 271 | Patient066D  | Patient217I |
| 271 | Patient066E  | Patient217A |
| 271 | Patient066E  | Patient217H |
| 271 | Patient066F  | Patient217H |
| 271 | Patient074E  | Patient103E |
| 271 | Patient092E  | Patient213A |
| 271 | Patient181B  | Patient217D |
| 271 | Patient181B  | Patient217F |
| 271 | Patient217A  | Patient230B |
| 271 | Patient217E  | Patient230B |
| 271 | Patient217H  | Patient230B |
| 272 | Patient021A2 | Patient028  |
| 272 | Patient021A2 | Patient157  |
| 272 | Patient023   | Patient196F |
| 272 | Patient066F  | Patient217A |
| 272 | Patient074D  | Patient230E |
| 272 | Patient074E  | Patient230D |
| 272 | Patient074E  | Patient230F |
| 272 | Patient092B  | Patient213A |
| 272 | Patient103B  | Patient141A |
| 272 | Patient141C  | Patient217I |
| 272 | Patient145B  | Patient217J |
| 272 | Patient181B  | Patient217B |

|     |              |             |
|-----|--------------|-------------|
| 272 | Patient181B  | Patient217H |
| 272 | Patient217F  | Patient230B |
| 273 | Patient021A1 | Patient201B |
| 273 | Patient021A1 | Patient232C |
| 273 | Patient021A1 | Patient232E |
| 273 | Patient021A2 | Patient104B |
| 273 | Patient021A2 | Patient201B |
| 273 | Patient021A2 | Patient232C |
| 273 | Patient021A2 | Patient232D |
| 273 | Patient023   | Patient104A |
| 273 | Patient145A  | Patient195  |
| 273 | Patient181A  | Patient217I |
| 273 | Patient181B  | Patient217E |
| 273 | Patient195   | Patient230D |
| 274 | Patient021A1 | Patient157  |
| 274 | Patient021A1 | Patient196D |
| 274 | Patient021A2 | Patient196D |
| 274 | Patient023   | Patient201B |
| 274 | Patient103D  | Patient145B |
| 274 | Patient103E  | Patient230E |
| 274 | Patient145B  | Patient258B |
| 274 | Patient181B  | Patient217A |
| 275 | Patient021A1 | Patient028  |
| 275 | Patient021A1 | Patient201E |
| 275 | Patient021A1 | Patient232D |
| 275 | Patient021A2 | Patient201E |
| 275 | Patient058   | Patient193  |
| 275 | Patient066D  | Patient217J |
| 275 | Patient066E  | Patient103C |
| 275 | Patient092D  | Patient213A |
| 275 | Patient092H  | Patient213A |
| 275 | Patient100A  | Patient126D |
| 275 | Patient121A  | Patient251  |
| 275 | Patient141B  | Patient217I |
| 275 | Patient141C  | Patient217J |
| 275 | Patient145B  | Patient161B |
| 275 | Patient145B  | Patient258G |
| 275 | Patient145C  | Patient217I |
| 275 | Patient150B  | Patient213A |
| 275 | Patient217I  | Patient230A |
| 276 | Patient021A2 | Patient201A |
| 276 | Patient141A  | Patient217I |
| 276 | Patient145B  | Patient258D |
| 276 | Patient150A  | Patient213A |
| 276 | Patient150C  | Patient213A |
| 277 | Patient021A1 | Patient201A |
| 277 | Patient022A  | Patient055  |
| 277 | Patient023   | Patient201E |
| 277 | Patient066F  | Patient103C |
| 277 | Patient074E  | Patient230B |

|     |              |              |
|-----|--------------|--------------|
| 277 | Patient145A  | Patient217C  |
| 277 | Patient145B  | Patient258A1 |
| 277 | Patient145B  | Patient258F  |
| 277 | Patient181A  | Patient217J  |
| 277 | Patient217I  | Patient230F  |
| 278 | Patient021A1 | Patient104B  |
| 278 | Patient026C  | Patient103D  |
| 278 | Patient026D  | Patient230G  |
| 278 | Patient066E  | Patient217I  |
| 278 | Patient066F  | Patient217I  |
| 278 | Patient092G  | Patient213A  |
| 278 | Patient103E  | Patient145B  |
| 278 | Patient145A  | Patient217D  |
| 278 | Patient145B  | Patient258A2 |
| 278 | Patient217I  | Patient230E  |
| 279 | Patient023   | Patient201A  |
| 279 | Patient023   | Patient247E  |
| 279 | Patient045A  | Patient177   |
| 279 | Patient074E  | Patient230E  |
| 279 | Patient141B  | Patient217J  |
| 279 | Patient145A  | Patient217B  |
| 279 | Patient145C  | Patient217J  |
| 279 | Patient217I  | Patient230B  |
| 279 | Patient217J  | Patient230A  |
| 280 | Patient066D  | Patient103B  |
| 280 | Patient066E  | Patient217J  |
| 280 | Patient141A  | Patient217J  |
| 280 | Patient145A  | Patient217A  |
| 280 | Patient145A  | Patient217E  |
| 280 | Patient145A  | Patient217H  |
| 280 | Patient192D  | Patient251   |
| 281 | Patient045B  | Patient177   |
| 281 | Patient066F  | Patient217J  |
| 281 | Patient103C  | Patient230A  |
| 281 | Patient114   | Patient193   |
| 281 | Patient121B  | Patient251   |
| 281 | Patient145A  | Patient217F  |
| 281 | Patient181B  | Patient217I  |
| 281 | Patient217J  | Patient230B  |
| 281 | Patient217J  | Patient230E  |
| 281 | Patient217J  | Patient230F  |
| 282 | Patient023   | Patient263A  |
| 282 | Patient026C  | Patient103E  |
| 282 | Patient026F  | Patient217C  |
| 282 | Patient103C  | Patient224B  |
| 282 | Patient145B  | Patient167   |
| 283 | Patient045C  | Patient177   |
| 283 | Patient145C  | Patient167   |
| 284 | Patient021A2 | Patient104A  |
| 284 | Patient026F  | Patient123A  |

|     |              |             |
|-----|--------------|-------------|
| 284 | Patient026F  | Patient217D |
| 284 | Patient066E  | Patient103B |
| 284 | Patient145C  | Patient258E |
| 284 | Patient181B  | Patient217J |
| 284 | Patient195   | Patient230A |
| 285 | Patient026B  | Patient123A |
| 285 | Patient026B  | Patient217C |
| 285 | Patient026F  | Patient217B |
| 285 | Patient026F  | Patient217E |
| 285 | Patient026F  | Patient217F |
| 285 | Patient066F  | Patient103B |
| 285 | Patient103D  | Patient230D |
| 285 | Patient195   | Patient230F |
| 286 | Patient021A1 | Patient246A |
| 286 | Patient026C  | Patient217C |
| 286 | Patient026D  | Patient123A |
| 286 | Patient026D  | Patient230C |
| 286 | Patient026F  | Patient217A |
| 286 | Patient026F  | Patient217H |
| 286 | Patient195   | Patient230E |
| 287 | Patient021A1 | Patient104A |
| 287 | Patient026A  | Patient123A |
| 287 | Patient026B  | Patient217B |
| 287 | Patient026B  | Patient217D |
| 287 | Patient026C  | Patient217D |
| 287 | Patient026F  | Patient123B |
| 287 | Patient026F  | Patient123C |
| 287 | Patient032E  | Patient161B |
| 288 | Patient021A2 | Patient246A |
| 288 | Patient026B  | Patient123B |
| 288 | Patient026B  | Patient123C |
| 288 | Patient026B  | Patient217E |
| 288 | Patient026B  | Patient217F |
| 288 | Patient026C  | Patient217B |
| 288 | Patient026C  | Patient217F |
| 288 | Patient026D  | Patient261C |
| 288 | Patient026D  | Patient261E |
| 288 | Patient081A2 | Patient167  |
| 288 | Patient081B  | Patient167  |
| 288 | Patient103B  | Patient230A |
| 288 | Patient103C  | Patient230B |
| 288 | Patient145A  | Patient217I |
| 289 | Patient026B  | Patient217A |
| 289 | Patient026B  | Patient217H |
| 289 | Patient026C  | Patient217A |
| 289 | Patient026C  | Patient217E |
| 289 | Patient026C  | Patient217H |
| 289 | Patient026E  | Patient230G |
| 289 | Patient032E  | Patient258B |
| 289 | Patient074B  | Patient181A |

|     |              |              |
|-----|--------------|--------------|
| 289 | Patient103B  | Patient224B  |
| 289 | Patient103C  | Patient230F  |
| 290 | Patient032E  | Patient258G  |
| 290 | Patient066D  | Patient167   |
| 290 | Patient081A1 | Patient167   |
| 290 | Patient081D  | Patient167   |
| 290 | Patient081F  | Patient167   |
| 290 | Patient103D  | Patient145C  |
| 290 | Patient103E  | Patient230D  |
| 290 | Patient145B  | Patient258E  |
| 290 | Patient167   | Patient224B  |
| 290 | Patient224B  | Patient261B  |
| 291 | Patient026A  | Patient123C  |
| 291 | Patient026D  | Patient123C  |
| 291 | Patient032E  | Patient258D  |
| 291 | Patient074A  | Patient181A  |
| 291 | Patient103C  | Patient230E  |
| 291 | Patient133   | Patient176   |
| 292 | Patient026A  | Patient123B  |
| 292 | Patient026C  | Patient074B  |
| 292 | Patient026F  | Patient230G  |
| 292 | Patient032E  | Patient258A2 |
| 292 | Patient032E  | Patient258F  |
| 292 | Patient066D  | Patient261B  |
| 292 | Patient081C  | Patient167   |
| 292 | Patient145A  | Patient217J  |
| 292 | Patient167   | Patient224A  |
| 293 | Patient026B  | Patient230G  |
| 293 | Patient026D  | Patient123B  |
| 293 | Patient032C  | Patient161B  |
| 293 | Patient032C  | Patient258G  |
| 293 | Patient032D  | Patient167   |
| 293 | Patient032E  | Patient258A1 |
| 293 | Patient066E  | Patient167   |
| 293 | Patient195   | Patient230B  |
| 293 | Patient224B  | Patient261A  |
| 294 | Patient021A1 | Patient246C  |
| 294 | Patient026A  | Patient217C  |
| 294 | Patient026A  | Patient230G  |
| 294 | Patient026D  | Patient032E  |
| 294 | Patient026D  | Patient123D  |
| 294 | Patient026D  | Patient141G  |
| 294 | Patient026E  | Patient123A  |
| 294 | Patient026E  | Patient230C  |
| 294 | Patient026F  | Patient123D  |
| 294 | Patient026F  | Patient217I  |
| 294 | Patient032A  | Patient167   |
| 294 | Patient032C  | Patient258B  |
| 294 | Patient032D  | Patient161B  |
| 294 | Patient066D  | Patient261A  |

|     |              |              |
|-----|--------------|--------------|
| 294 | Patient066F  | Patient167   |
| 294 | Patient081E  | Patient167   |
| 294 | Patient103B  | Patient230F  |
| 294 | Patient103E  | Patient145C  |
| 294 | Patient141C  | Patient195   |
| 294 | Patient145C  | Patient161B  |
| 295 | Patient021A2 | Patient246C  |
| 295 | Patient026A  | Patient217D  |
| 295 | Patient026B  | Patient123D  |
| 295 | Patient026C  | Patient074A  |
| 295 | Patient026D  | Patient261B  |
| 295 | Patient032C  | Patient258D  |
| 295 | Patient074C  | Patient181A  |
| 295 | Patient103B  | Patient230B  |
| 295 | Patient103D  | Patient217C  |
| 295 | Patient145A  | Patient167   |
| 296 | Patient026A  | Patient217B  |
| 296 | Patient026C  | Patient217I  |
| 296 | Patient026F  | Patient217J  |
| 296 | Patient032E  | Patient167   |
| 296 | Patient066E  | Patient261B  |
| 296 | Patient123A  | Patient258E  |
| 296 | Patient141B  | Patient195   |
| 296 | Patient145A  | Patient258E  |
| 296 | Patient150A  | Patient192D  |
| 296 | Patient161B  | Patient224A  |
| 296 | Patient224A  | Patient261B  |
| 297 | Patient026A  | Patient123D  |
| 297 | Patient026A  | Patient217A  |
| 297 | Patient026A  | Patient217E  |
| 297 | Patient026A  | Patient217H  |
| 297 | Patient026B  | Patient217I  |
| 297 | Patient026D  | Patient141F  |
| 297 | Patient026D  | Patient261G  |
| 297 | Patient026E  | Patient261C  |
| 297 | Patient026E  | Patient261E  |
| 297 | Patient032C  | Patient258A2 |
| 297 | Patient032C  | Patient258F  |
| 297 | Patient032D  | Patient251   |
| 297 | Patient058   | Patient114   |
| 297 | Patient066E  | Patient261A  |
| 297 | Patient103D  | Patient217D  |
| 297 | Patient150B  | Patient192D  |
| 297 | Patient161B  | Patient230G  |
| 297 | Patient224A  | Patient261A  |
| 298 | Patient026A  | Patient217F  |
| 298 | Patient026C  | Patient074C  |
| 298 | Patient026D  | Patient261A  |
| 298 | Patient032B  | Patient167   |
| 298 | Patient032C  | Patient258A1 |

|     |              |             |
|-----|--------------|-------------|
| 298 | Patient032D  | Patient258E |
| 298 | Patient034A  | Patient167  |
| 298 | Patient074B  | Patient181B |
| 298 | Patient103B  | Patient230E |
| 298 | Patient103D  | Patient217B |
| 298 | Patient103D  | Patient217E |
| 298 | Patient103D  | Patient217F |
| 298 | Patient224B  | Patient261D |
| 298 | Patient230G  | Patient258B |
| 298 | Patient230G  | Patient258G |
| 298 | Patient258G  | Patient261C |
| 299 | Patient026B  | Patient032D |
| 299 | Patient026B  | Patient217J |
| 299 | Patient026D  | Patient032C |
| 299 | Patient026D  | Patient032D |
| 299 | Patient026E  | Patient123C |
| 299 | Patient026F  | Patient032D |
| 299 | Patient032C  | Patient167  |
| 299 | Patient034D  | Patient167  |
| 299 | Patient066D  | Patient261D |
| 299 | Patient066F  | Patient261B |
| 299 | Patient103D  | Patient217A |
| 299 | Patient103D  | Patient217H |
| 299 | Patient133   | Patient164  |
| 299 | Patient258B  | Patient261C |
| 299 | Patient258B  | Patient261E |
| 300 | Patient026A  | Patient032D |
| 300 | Patient026C  | Patient123A |
| 300 | Patient034B  | Patient167  |
| 300 | Patient066F  | Patient261A |
| 300 | Patient074A  | Patient181B |
| 300 | Patient092C  | Patient251  |
| 300 | Patient103C  | Patient161B |
| 300 | Patient103E  | Patient217C |
| 300 | Patient141G  | Patient258B |
| 300 | Patient150C  | Patient192D |
| 300 | Patient230G  | Patient258D |
| 300 | Patient258D  | Patient261C |
| 300 | Patient258G  | Patient261E |
| 301 | Patient021A1 | Patient246B |
| 301 | Patient026C  | Patient217J |
| 301 | Patient026E  | Patient123B |
| 301 | Patient026F  | Patient141D |
| 301 | Patient026F  | Patient230C |
| 301 | Patient026F  | Patient261E |
| 301 | Patient032A  | Patient161B |
| 301 | Patient034E  | Patient167  |
| 301 | Patient074A  | Patient167  |
| 301 | Patient074B  | Patient167  |
| 301 | Patient074D  | Patient181A |



|     |              |              |
|-----|--------------|--------------|
| 301 | Patient103E  | Patient217D  |
| 301 | Patient141A  | Patient195   |
| 301 | Patient141C  | Patient167   |
| 301 | Patient141G  | Patient161B  |
| 301 | Patient141G  | Patient258G  |
| 301 | Patient145B  | Patient251   |
| 301 | Patient145C  | Patient251   |
| 301 | Patient230C  | Patient258B  |
| 301 | Patient230G  | Patient258A1 |
| 301 | Patient230G  | Patient258A2 |
| 301 | Patient230G  | Patient258F  |
| 301 | Patient258D  | Patient261E  |
| 301 | Patient258F  | Patient261C  |
| 302 | Patient021A2 | Patient246B  |
| 302 | Patient026A  | Patient230C  |
| 302 | Patient026A  | Patient261E  |
| 302 | Patient026B  | Patient141D  |
| 302 | Patient026B  | Patient230C  |
| 302 | Patient026B  | Patient261E  |
| 302 | Patient026D  | Patient141D  |
| 302 | Patient026E  | Patient123D  |
| 302 | Patient026F  | Patient261C  |
| 302 | Patient066D  | Patient251   |
| 302 | Patient066E  | Patient261D  |
| 302 | Patient123C  | Patient258E  |
| 302 | Patient141D  | Patient167   |
| 302 | Patient141G  | Patient258D  |
| 302 | Patient230C  | Patient258G  |
| 302 | Patient258A1 | Patient261C  |
| 302 | Patient258A1 | Patient261E  |
| 302 | Patient258A2 | Patient261E  |
| 302 | Patient258F  | Patient261E  |
| 303 | Patient021A2 | Patient246E  |
| 303 | Patient026A  | Patient141D  |
| 303 | Patient026B  | Patient261C  |
| 303 | Patient026E  | Patient032E  |
| 303 | Patient026E  | Patient141G  |
| 303 | Patient032D  | Patient258B  |
| 303 | Patient066D  | Patient195   |
| 303 | Patient103E  | Patient217B  |
| 303 | Patient103E  | Patient217H  |
| 303 | Patient121A  | Patient177   |
| 303 | Patient123B  | Patient258E  |
| 303 | Patient141G  | Patient258A1 |
| 303 | Patient141G  | Patient258A2 |
| 303 | Patient141G  | Patient258F  |
| 303 | Patient145C  | Patient258B  |
| 303 | Patient145C  | Patient258G  |
| 303 | Patient161B  | Patient230C  |
| 303 | Patient161B  | Patient261E  |

|     |              |              |
|-----|--------------|--------------|
| 303 | Patient230C  | Patient258D  |
| 303 | Patient258A2 | Patient261C  |
| 303 | Patient258B  | Patient261B  |
| 304 | Patient021A1 | Patient246E  |
| 304 | Patient026A  | Patient261C  |
| 304 | Patient026B  | Patient032A  |
| 304 | Patient026D  | Patient261D  |
| 304 | Patient026E  | Patient261B  |
| 304 | Patient026F  | Patient032A  |
| 304 | Patient032D  | Patient258G  |
| 304 | Patient074B  | Patient217C  |
| 304 | Patient074C  | Patient181B  |
| 304 | Patient092A  | Patient251   |
| 304 | Patient103D  | Patient145A  |
| 304 | Patient103E  | Patient217A  |
| 304 | Patient103E  | Patient217E  |
| 304 | Patient141B  | Patient167   |
| 304 | Patient167   | Patient230G  |
| 304 | Patient230C  | Patient258A1 |
| 304 | Patient230C  | Patient258A2 |
| 304 | Patient230C  | Patient258F  |
| 304 | Patient258G  | Patient261A  |
| 304 | Patient258G  | Patient261B  |
| 305 | Patient026A  | Patient032A  |
| 305 | Patient026A  | Patient217I  |
| 305 | Patient026C  | Patient074D  |
| 305 | Patient026C  | Patient123C  |
| 305 | Patient026D  | Patient032A  |
| 305 | Patient026D  | Patient224A  |
| 305 | Patient032A  | Patient251   |
| 305 | Patient032B  | Patient161B  |
| 305 | Patient032D  | Patient258A2 |
| 305 | Patient032D  | Patient258D  |
| 305 | Patient032E  | Patient258E  |
| 305 | Patient066F  | Patient261D  |
| 305 | Patient074B  | Patient217D  |
| 305 | Patient081A2 | Patient251   |
| 305 | Patient092B  | Patient251   |
| 305 | Patient103C  | Patient167   |
| 305 | Patient103C  | Patient230D  |
| 305 | Patient103E  | Patient217F  |
| 305 | Patient123D  | Patient258E  |
| 305 | Patient141F  | Patient258B  |
| 305 | Patient141F  | Patient258G  |
| 305 | Patient145C  | Patient258D  |
| 305 | Patient161B  | Patient167   |
| 305 | Patient224A  | Patient261D  |
| 305 | Patient258B  | Patient261A  |
| 305 | Patient258D  | Patient261B  |
| 306 | Patient026C  | Patient123B  |

|     |              |              |
|-----|--------------|--------------|
| 306 | Patient026D  | Patient217C  |
| 306 | Patient026E  | Patient141F  |
| 306 | Patient026E  | Patient261G  |
| 306 | Patient032D  | Patient258F  |
| 306 | Patient034A  | Patient161B  |
| 306 | Patient034C  | Patient167   |
| 306 | Patient074A  | Patient217C  |
| 306 | Patient074B  | Patient217B  |
| 306 | Patient074B  | Patient217H  |
| 306 | Patient074C  | Patient167   |
| 306 | Patient074E  | Patient181A  |
| 306 | Patient081A1 | Patient251   |
| 306 | Patient081B  | Patient251   |
| 306 | Patient092E  | Patient251   |
| 306 | Patient141F  | Patient161B  |
| 306 | Patient145C  | Patient258A1 |
| 306 | Patient145C  | Patient258F  |
| 306 | Patient161B  | Patient261C  |
| 306 | Patient258A1 | Patient261B  |
| 306 | Patient258A2 | Patient261B  |
| 306 | Patient258D  | Patient261A  |
| 306 | Patient258F  | Patient261B  |
| 307 | Patient021A1 | Patient246D  |
| 307 | Patient021A2 | Patient247B  |
| 307 | Patient026D  | Patient217D  |
| 307 | Patient026E  | Patient032D  |
| 307 | Patient026E  | Patient261A  |
| 307 | Patient032D  | Patient258A1 |
| 307 | Patient066F  | Patient195   |
| 307 | Patient074B  | Patient217A  |
| 307 | Patient074B  | Patient217E  |
| 307 | Patient074B  | Patient217F  |
| 307 | Patient103B  | Patient161B  |
| 307 | Patient103D  | Patient217I  |
| 307 | Patient141F  | Patient258D  |
| 307 | Patient145A  | Patient161B  |
| 307 | Patient145C  | Patient258A2 |
| 307 | Patient167   | Patient181A  |
| 307 | Patient167   | Patient261A  |
| 307 | Patient217C  | Patient230D  |
| 308 | Patient021A1 | Patient247B  |
| 308 | Patient021A1 | Patient247C  |
| 308 | Patient021A2 | Patient246D  |
| 308 | Patient026A  | Patient032E  |
| 308 | Patient026B  | Patient032E  |
| 308 | Patient026D  | Patient217B  |
| 308 | Patient026E  | Patient032C  |
| 308 | Patient026F  | Patient032E  |
| 308 | Patient026F  | Patient224A  |
| 308 | Patient034B  | Patient161B  |

|     |              |              |
|-----|--------------|--------------|
| 308 | Patient034D  | Patient161B  |
| 308 | Patient034E  | Patient161B  |
| 308 | Patient066E  | Patient195   |
| 308 | Patient066E  | Patient251   |
| 308 | Patient074A  | Patient217D  |
| 308 | Patient074A  | Patient217F  |
| 308 | Patient074B  | Patient195   |
| 308 | Patient081C  | Patient251   |
| 308 | Patient081D  | Patient251   |
| 308 | Patient081E  | Patient251   |
| 308 | Patient081F  | Patient251   |
| 308 | Patient092D  | Patient251   |
| 308 | Patient103E  | Patient145A  |
| 308 | Patient141A  | Patient167   |
| 308 | Patient141F  | Patient258A1 |
| 308 | Patient141F  | Patient258A2 |
| 308 | Patient141F  | Patient258F  |
| 308 | Patient167   | Patient261B  |
| 308 | Patient167   | Patient261C  |
| 308 | Patient167   | Patient261E  |
| 308 | Patient217D  | Patient230D  |
| 308 | Patient258A1 | Patient261A  |
| 308 | Patient258A2 | Patient261A  |
| 308 | Patient258B  | Patient261G  |
| 308 | Patient258F  | Patient261A  |
| 309 | Patient021A2 | Patient247A  |
| 309 | Patient021A2 | Patient247C  |
| 309 | Patient026A  | Patient217J  |
| 309 | Patient026D  | Patient217A  |
| 309 | Patient026D  | Patient217E  |
| 309 | Patient026D  | Patient217H  |
| 309 | Patient026F  | Patient141G  |
| 309 | Patient032A  | Patient258E  |
| 309 | Patient034A  | Patient251   |
| 309 | Patient074A  | Patient195   |
| 309 | Patient074A  | Patient217B  |
| 309 | Patient074A  | Patient217E  |
| 309 | Patient074A  | Patient217H  |
| 309 | Patient097A  | Patient100A  |
| 309 | Patient103D  | Patient217J  |
| 309 | Patient123A  | Patient217C  |
| 309 | Patient167   | Patient230E  |
| 309 | Patient167   | Patient230F  |
| 309 | Patient217A  | Patient230D  |
| 309 | Patient217B  | Patient230D  |
| 309 | Patient258G  | Patient261G  |
| 310 | Patient021A1 | Patient247A  |
| 310 | Patient022B  | Patient133   |
| 310 | Patient026A  | Patient141G  |
| 310 | Patient026B  | Patient032B  |

|     |              |             |
|-----|--------------|-------------|
| 310 | Patient026B  | Patient141G |
| 310 | Patient026D  | Patient034A |
| 310 | Patient026D  | Patient217F |
| 310 | Patient026F  | Patient032B |
| 310 | Patient032B  | Patient251  |
| 310 | Patient032C  | Patient258E |
| 310 | Patient032E  | Patient251  |
| 310 | Patient066F  | Patient251  |
| 310 | Patient074A  | Patient217A |
| 310 | Patient074C  | Patient217C |
| 310 | Patient074D  | Patient181B |
| 310 | Patient081B  | Patient123A |
| 310 | Patient092H  | Patient251  |
| 310 | Patient103B  | Patient230D |
| 310 | Patient123A  | Patient217D |
| 310 | Patient141D  | Patient161B |
| 310 | Patient141G  | Patient167  |
| 310 | Patient167   | Patient230C |
| 310 | Patient217E  | Patient230D |
| 310 | Patient217H  | Patient230D |
| 310 | Patient258D  | Patient261G |
| 311 | Patient026A  | Patient032B |
| 311 | Patient026B  | Patient032C |
| 311 | Patient026B  | Patient224A |
| 311 | Patient026C  | Patient074E |
| 311 | Patient026C  | Patient123D |
| 311 | Patient026D  | Patient032B |
| 311 | Patient026D  | Patient034B |
| 311 | Patient026E  | Patient217C |
| 311 | Patient026F  | Patient032C |
| 311 | Patient026F  | Patient034A |
| 311 | Patient026F  | Patient141F |
| 311 | Patient034C  | Patient161B |
| 311 | Patient034D  | Patient251  |
| 311 | Patient034E  | Patient251  |
| 311 | Patient081A2 | Patient123A |
| 311 | Patient097D  | Patient100A |
| 311 | Patient123A  | Patient217B |
| 311 | Patient167   | Patient230A |
| 311 | Patient167   | Patient230D |
| 311 | Patient217F  | Patient230D |
| 311 | Patient224B  | Patient251  |
| 311 | Patient258A1 | Patient261G |
| 311 | Patient258A2 | Patient261G |
| 311 | Patient258F  | Patient261G |
| 311 | Patient258G  | Patient261D |
| 312 | Patient026A  | Patient034A |
| 312 | Patient026A  | Patient224A |
| 312 | Patient026B  | Patient034A |
| 312 | Patient026B  | Patient034B |

|     |              |             |
|-----|--------------|-------------|
| 312 | Patient026B  | Patient034D |
| 312 | Patient026B  | Patient141F |
| 312 | Patient026D  | Patient034E |
| 312 | Patient026D  | Patient230D |
| 312 | Patient026D  | Patient230E |
| 312 | Patient026E  | Patient217D |
| 312 | Patient026E  | Patient224A |
| 312 | Patient026F  | Patient034B |
| 312 | Patient026F  | Patient034D |
| 312 | Patient026F  | Patient261G |
| 312 | Patient032A  | Patient258B |
| 312 | Patient034B  | Patient251  |
| 312 | Patient074C  | Patient217D |
| 312 | Patient074C  | Patient217F |
| 312 | Patient079C  | Patient189B |
| 312 | Patient081A1 | Patient123A |
| 312 | Patient092G  | Patient251  |
| 312 | Patient103B  | Patient167  |
| 312 | Patient103E  | Patient217I |
| 312 | Patient123A  | Patient217A |
| 312 | Patient123A  | Patient217E |
| 312 | Patient123A  | Patient217H |
| 312 | Patient123A  | Patient251  |
| 312 | Patient126D  | Patient252B |
| 312 | Patient127A  | Patient189A |
| 312 | Patient127A  | Patient189B |
| 312 | Patient127A  | Patient189E |
| 312 | Patient127B  | Patient189B |
| 312 | Patient141C  | Patient251  |
| 312 | Patient224A  | Patient251  |
| 312 | Patient258B  | Patient261D |
| 313 | Patient021A2 | Patient247E |
| 313 | Patient026A  | Patient032C |
| 313 | Patient026A  | Patient034B |
| 313 | Patient026A  | Patient141F |
| 313 | Patient026A  | Patient261G |
| 313 | Patient026B  | Patient261G |
| 313 | Patient026D  | Patient230A |
| 313 | Patient026D  | Patient230F |
| 313 | Patient026E  | Patient141D |
| 313 | Patient026E  | Patient217B |
| 313 | Patient026E  | Patient261D |
| 313 | Patient026F  | Patient103A |
| 313 | Patient032A  | Patient258G |
| 313 | Patient032B  | Patient258E |
| 313 | Patient032C  | Patient251  |
| 313 | Patient034A  | Patient258E |
| 313 | Patient074C  | Patient195  |
| 313 | Patient074C  | Patient217B |
| 313 | Patient074C  | Patient217E |

|     |              |              |
|-----|--------------|--------------|
| 313 | Patient074C  | Patient217H  |
| 313 | Patient074D  | Patient167   |
| 313 | Patient079A1 | Patient189A  |
| 313 | Patient079A1 | Patient189B  |
| 313 | Patient081A2 | Patient123B  |
| 313 | Patient081A2 | Patient123C  |
| 313 | Patient081B  | Patient123C  |
| 313 | Patient097C  | Patient100A  |
| 313 | Patient103A  | Patient167   |
| 313 | Patient123A  | Patient126A  |
| 313 | Patient123A  | Patient217F  |
| 313 | Patient141B  | Patient251   |
| 313 | Patient230A  | Patient261B  |
| 313 | Patient230G  | Patient258E  |
| 313 | Patient258D  | Patient261D  |
| 314 | Patient021A1 | Patient247E  |
| 314 | Patient023   | Patient246C  |
| 314 | Patient026B  | Patient034E  |
| 314 | Patient026B  | Patient103A  |
| 314 | Patient026C  | Patient103C  |
| 314 | Patient026D  | Patient034D  |
| 314 | Patient026D  | Patient217I  |
| 314 | Patient026E  | Patient032A  |
| 314 | Patient026E  | Patient217A  |
| 314 | Patient026E  | Patient217E  |
| 314 | Patient026E  | Patient217H  |
| 314 | Patient026F  | Patient034E  |
| 314 | Patient032A  | Patient258D  |
| 314 | Patient074C  | Patient217A  |
| 314 | Patient121B  | Patient177   |
| 314 | Patient123B  | Patient217C  |
| 314 | Patient123C  | Patient217C  |
| 314 | Patient127B  | Patient189A  |
| 314 | Patient141F  | Patient167   |
| 314 | Patient167   | Patient181B  |
| 314 | Patient167   | Patient261D  |
| 315 | Patient026A  | Patient034D  |
| 315 | Patient026A  | Patient034E  |
| 315 | Patient026E  | Patient217F  |
| 315 | Patient032A  | Patient258A2 |
| 315 | Patient032A  | Patient258F  |
| 315 | Patient034B  | Patient258E  |
| 315 | Patient034C  | Patient251   |
| 315 | Patient074B  | Patient217I  |
| 315 | Patient074E  | Patient181B  |
| 315 | Patient079A1 | Patient189E  |
| 315 | Patient079C  | Patient189A  |
| 315 | Patient081A1 | Patient123C  |
| 315 | Patient081B  | Patient123B  |
| 315 | Patient123C  | Patient217D  |

|     |              |              |
|-----|--------------|--------------|
| 315 | Patient141D  | Patient251   |
| 315 | Patient145A  | Patient251   |
| 315 | Patient145A  | Patient258B  |
| 315 | Patient217I  | Patient230D  |
| 315 | Patient230A  | Patient261A  |
| 315 | Patient230E  | Patient261B  |
| 315 | Patient258A1 | Patient261D  |
| 315 | Patient258A2 | Patient261D  |
| 315 | Patient258E  | Patient261C  |
| 315 | Patient258E  | Patient261E  |
| 315 | Patient258F  | Patient261D  |
| 316 | Patient026D  | Patient103A  |
| 316 | Patient026F  | Patient034C  |
| 316 | Patient032A  | Patient258A1 |
| 316 | Patient032B  | Patient258B  |
| 316 | Patient034A  | Patient258B  |
| 316 | Patient034E  | Patient258E  |
| 316 | Patient079A2 | Patient189A  |
| 316 | Patient079A2 | Patient189B  |
| 316 | Patient079C  | Patient189E  |
| 316 | Patient081A1 | Patient123B  |
| 316 | Patient081E  | Patient123A  |
| 316 | Patient081F  | Patient123A  |
| 316 | Patient097E  | Patient100A  |
| 316 | Patient103E  | Patient217J  |
| 316 | Patient123A  | Patient126C  |
| 316 | Patient123B  | Patient217D  |
| 316 | Patient123B  | Patient217F  |
| 316 | Patient123C  | Patient217B  |
| 316 | Patient127B  | Patient189E  |
| 316 | Patient141A  | Patient251   |
| 316 | Patient141G  | Patient258E  |
| 316 | Patient145A  | Patient258G  |
| 316 | Patient161B  | Patient261G  |
| 316 | Patient164   | Patient176   |
| 316 | Patient230F  | Patient261B  |
| 317 | Patient026A  | Patient034C  |
| 317 | Patient026A  | Patient103A  |
| 317 | Patient026B  | Patient034C  |
| 317 | Patient026D  | Patient141B  |
| 317 | Patient026D  | Patient141C  |
| 317 | Patient032B  | Patient258G  |
| 317 | Patient034A  | Patient258G  |
| 317 | Patient074D  | Patient217C  |
| 317 | Patient079B  | Patient189A  |
| 317 | Patient081F  | Patient123C  |
| 317 | Patient123A  | Patient258B  |
| 317 | Patient123B  | Patient217B  |
| 317 | Patient123B  | Patient217E  |
| 317 | Patient123B  | Patient217H  |



|     |              |              |
|-----|--------------|--------------|
| 317 | Patient123B  | Patient251   |
| 317 | Patient123C  | Patient126A  |
| 317 | Patient123C  | Patient217A  |
| 317 | Patient123C  | Patient217E  |
| 317 | Patient123C  | Patient217F  |
| 317 | Patient123C  | Patient217H  |
| 317 | Patient123C  | Patient251   |
| 317 | Patient126D  | Patient252A  |
| 317 | Patient141D  | Patient258E  |
| 317 | Patient145A  | Patient258D  |
| 317 | Patient167   | Patient230B  |
| 317 | Patient167   | Patient261G  |
| 317 | Patient189B  | Patient220A  |
| 317 | Patient230C  | Patient258E  |
| 317 | Patient230E  | Patient261A  |
| 318 | Patient026D  | Patient034C  |
| 318 | Patient026D  | Patient224B  |
| 318 | Patient032B  | Patient258D  |
| 318 | Patient034B  | Patient258B  |
| 318 | Patient034D  | Patient258E  |
| 318 | Patient034E  | Patient258B  |
| 318 | Patient074A  | Patient217I  |
| 318 | Patient074D  | Patient217D  |
| 318 | Patient079A2 | Patient189E  |
| 318 | Patient079B  | Patient189B  |
| 318 | Patient081E  | Patient123C  |
| 318 | Patient081F  | Patient123B  |
| 318 | Patient097B  | Patient100A  |
| 318 | Patient103C  | Patient251   |
| 318 | Patient123A  | Patient258G  |
| 318 | Patient123B  | Patient126C  |
| 318 | Patient123B  | Patient217A  |
| 318 | Patient126D  | Patient252F  |
| 318 | Patient145A  | Patient258A1 |
| 318 | Patient145A  | Patient258F  |
| 318 | Patient161B  | Patient261B  |
| 318 | Patient181A  | Patient261B  |
| 318 | Patient189A  | Patient220A  |
| 318 | Patient224A  | Patient258B  |
| 318 | Patient230G  | Patient251   |
| 319 | Patient023   | Patient246B  |
| 319 | Patient026E  | Patient034A  |
| 319 | Patient026E  | Patient217I  |
| 319 | Patient032B  | Patient258A1 |
| 319 | Patient032B  | Patient258A2 |
| 319 | Patient032B  | Patient258F  |
| 319 | Patient034A  | Patient258A2 |
| 319 | Patient034A  | Patient258D  |
| 319 | Patient034A  | Patient258F  |
| 319 | Patient034B  | Patient258G  |

|     |              |              |
|-----|--------------|--------------|
| 319 | Patient034D  | Patient258G  |
| 319 | Patient034E  | Patient258G  |
| 319 | Patient058   | Patient089A1 |
| 319 | Patient074B  | Patient217J  |
| 319 | Patient074D  | Patient217B  |
| 319 | Patient074D  | Patient217H  |
| 319 | Patient074E  | Patient167   |
| 319 | Patient123A  | Patient258D  |
| 319 | Patient123B  | Patient126A  |
| 319 | Patient123C  | Patient126C  |
| 319 | Patient145A  | Patient258A2 |
| 319 | Patient189E  | Patient220A  |
| 319 | Patient224A  | Patient258D  |
| 319 | Patient224A  | Patient258F  |
| 319 | Patient224A  | Patient258G  |
| 319 | Patient230F  | Patient261A  |
| 320 | Patient022B  | Patient176   |
| 320 | Patient023   | Patient246E  |
| 320 | Patient026E  | Patient032B  |
| 320 | Patient026E  | Patient034B  |
| 320 | Patient026E  | Patient230D  |
| 320 | Patient026E  | Patient230E  |
| 320 | Patient034A  | Patient258A1 |
| 320 | Patient034B  | Patient258D  |
| 320 | Patient034D  | Patient258B  |
| 320 | Patient034E  | Patient258D  |
| 320 | Patient074A  | Patient217J  |
| 320 | Patient074D  | Patient217A  |
| 320 | Patient074D  | Patient217E  |
| 320 | Patient074D  | Patient217F  |
| 320 | Patient081A1 | Patient123D  |
| 320 | Patient081B  | Patient123D  |
| 320 | Patient081E  | Patient123B  |
| 320 | Patient123A  | Patient217I  |
| 320 | Patient123A  | Patient258A1 |
| 320 | Patient123A  | Patient258A2 |
| 320 | Patient123A  | Patient258F  |
| 320 | Patient123D  | Patient217C  |
| 320 | Patient141D  | Patient258B  |
| 320 | Patient141F  | Patient258E  |
| 320 | Patient141G  | Patient251   |
| 320 | Patient161B  | Patient251   |
| 320 | Patient180   | Patient238   |
| 321 | Patient022B  | Patient164   |
| 321 | Patient026C  | Patient103B  |
| 321 | Patient026D  | Patient141A  |
| 321 | Patient026D  | Patient217J  |
| 321 | Patient026D  | Patient230B  |
| 321 | Patient026E  | Patient034E  |
| 321 | Patient026E  | Patient230A  |

|     |              |              |
|-----|--------------|--------------|
| 321 | Patient026E  | Patient230F  |
| 321 | Patient026F  | Patient224B  |
| 321 | Patient034B  | Patient258F  |
| 321 | Patient034C  | Patient258E  |
| 321 | Patient034D  | Patient258D  |
| 321 | Patient034E  | Patient258A2 |
| 321 | Patient034E  | Patient258F  |
| 321 | Patient074D  | Patient195   |
| 321 | Patient081A2 | Patient123D  |
| 321 | Patient081D  | Patient224A  |
| 321 | Patient123D  | Patient126A  |
| 321 | Patient123D  | Patient217D  |
| 321 | Patient123D  | Patient251   |
| 321 | Patient141D  | Patient258G  |
| 321 | Patient181A  | Patient251   |
| 321 | Patient181A  | Patient261A  |
| 321 | Patient224A  | Patient258A1 |
| 321 | Patient224A  | Patient258A2 |
| 321 | Patient230A  | Patient261D  |
| 321 | Patient230E  | Patient258B  |
| 321 | Patient230E  | Patient258G  |
| 322 | Patient026B  | Patient224B  |
| 322 | Patient034B  | Patient258A1 |
| 322 | Patient034B  | Patient258A2 |
| 322 | Patient034E  | Patient258A1 |
| 322 | Patient074C  | Patient217I  |
| 322 | Patient079B  | Patient189E  |
| 322 | Patient081C  | Patient224A  |
| 322 | Patient103A  | Patient161B  |
| 322 | Patient123D  | Patient217B  |
| 322 | Patient141D  | Patient258D  |
| 322 | Patient161B  | Patient261A  |
| 322 | Patient217J  | Patient230D  |
| 322 | Patient230C  | Patient251   |
| 322 | Patient230E  | Patient261D  |
| 322 | Patient251   | Patient261A  |
| 322 | Patient251   | Patient261B  |
| 323 | Patient021A2 | Patient247D  |
| 323 | Patient026E  | Patient034D  |
| 323 | Patient034D  | Patient258A2 |
| 323 | Patient034D  | Patient258F  |
| 323 | Patient045A  | Patient092C  |
| 323 | Patient058   | Patient089A2 |
| 323 | Patient074C  | Patient217J  |
| 323 | Patient074E  | Patient217C  |
| 323 | Patient081C  | Patient103C  |
| 323 | Patient123B  | Patient258G  |
| 323 | Patient123C  | Patient258B  |
| 323 | Patient123C  | Patient258G  |
| 323 | Patient123D  | Patient217A  |

|     |              |              |
|-----|--------------|--------------|
| 323 | Patient123D  | Patient217E  |
| 323 | Patient123D  | Patient217H  |
| 323 | Patient126C  | Patient251   |
| 323 | Patient141D  | Patient258A2 |
| 323 | Patient141D  | Patient258F  |
| 323 | Patient167   | Patient192D  |
| 323 | Patient230D  | Patient251   |
| 323 | Patient230E  | Patient258D  |
| 323 | Patient230F  | Patient258B  |
| 323 | Patient230F  | Patient258G  |
| 324 | Patient021A1 | Patient247D  |
| 324 | Patient026E  | Patient141B  |
| 324 | Patient026E  | Patient141C  |
| 324 | Patient026F  | Patient141C  |
| 324 | Patient034C  | Patient258B  |
| 324 | Patient034D  | Patient258A1 |
| 324 | Patient074E  | Patient217D  |
| 324 | Patient081C  | Patient123A  |
| 324 | Patient081D  | Patient103C  |
| 324 | Patient081D  | Patient123A  |
| 324 | Patient081E  | Patient123D  |
| 324 | Patient100A  | Patient252B  |
| 324 | Patient103B  | Patient251   |
| 324 | Patient123A  | Patient217J  |
| 324 | Patient123B  | Patient258B  |
| 324 | Patient123D  | Patient217F  |
| 324 | Patient141D  | Patient258A1 |
| 324 | Patient149B  | Patient189A  |
| 324 | Patient149B  | Patient189B  |
| 324 | Patient149B  | Patient189E  |
| 324 | Patient181A  | Patient261D  |
| 324 | Patient189B  | Patient236B  |
| 324 | Patient217C  | Patient251   |
| 324 | Patient230B  | Patient261B  |
| 324 | Patient230E  | Patient258A2 |
| 324 | Patient230E  | Patient258F  |
| 324 | Patient230F  | Patient258D  |
| 324 | Patient230F  | Patient261D  |
| 324 | Patient258E  | Patient261G  |
| 325 | Patient026D  | Patient145B  |
| 325 | Patient026E  | Patient103A  |
| 325 | Patient026E  | Patient224B  |
| 325 | Patient026F  | Patient141B  |
| 325 | Patient034C  | Patient258G  |
| 325 | Patient045A  | Patient235F  |
| 325 | Patient045B  | Patient092C  |
| 325 | Patient074E  | Patient217B  |
| 325 | Patient074E  | Patient217H  |
| 325 | Patient123B  | Patient258D  |
| 325 | Patient123C  | Patient217I  |

|     |             |              |
|-----|-------------|--------------|
| 325 | Patient123C | Patient258D  |
| 325 | Patient126A | Patient251   |
| 325 | Patient217D | Patient251   |
| 325 | Patient230E | Patient258A1 |
| 325 | Patient230F | Patient251   |
| 325 | Patient230F | Patient258A2 |
| 325 | Patient230F | Patient258F  |
| 325 | Patient251  | Patient261C  |
| 325 | Patient251  | Patient261E  |
| 326 | Patient026B | Patient141C  |
| 326 | Patient026E | Patient034C  |
| 326 | Patient026E | Patient217J  |
| 326 | Patient034C | Patient258D  |
| 326 | Patient045B | Patient235F  |
| 326 | Patient074E | Patient195   |
| 326 | Patient074E | Patient217A  |
| 326 | Patient074E | Patient217E  |
| 326 | Patient074E | Patient217F  |
| 326 | Patient081C | Patient123B  |
| 326 | Patient081D | Patient123B  |
| 326 | Patient081F | Patient123D  |
| 326 | Patient100A | Patient252A  |
| 326 | Patient123A | Patient150A  |
| 326 | Patient123A | Patient150B  |
| 326 | Patient123B | Patient217I  |
| 326 | Patient123C | Patient258A1 |
| 326 | Patient123C | Patient258A2 |
| 326 | Patient123C | Patient258F  |
| 326 | Patient123D | Patient126C  |
| 326 | Patient123D | Patient258B  |
| 326 | Patient141F | Patient251   |
| 326 | Patient217B | Patient251   |
| 326 | Patient230A | Patient251   |
| 326 | Patient230D | Patient258B  |
| 326 | Patient230E | Patient251   |
| 326 | Patient230F | Patient258A1 |
| 327 | Patient026B | Patient141B  |
| 327 | Patient034C | Patient258A2 |
| 327 | Patient034C | Patient258F  |
| 327 | Patient045A | Patient092A  |
| 327 | Patient045C | Patient092C  |
| 327 | Patient081C | Patient123C  |
| 327 | Patient081D | Patient123C  |
| 327 | Patient103A | Patient195   |
| 327 | Patient123B | Patient258A1 |
| 327 | Patient123B | Patient258A2 |
| 327 | Patient123B | Patient258F  |
| 327 | Patient123D | Patient258G  |
| 327 | Patient161B | Patient261D  |
| 327 | Patient167  | Patient195   |

|     |              |              |
|-----|--------------|--------------|
| 327 | Patient181B  | Patient261B  |
| 327 | Patient189A  | Patient236B  |
| 327 | Patient217E  | Patient251   |
| 327 | Patient217F  | Patient251   |
| 327 | Patient230A  | Patient258B  |
| 327 | Patient230B  | Patient261A  |
| 327 | Patient230D  | Patient258G  |
| 328 | Patient026E  | Patient141A  |
| 328 | Patient034C  | Patient258A1 |
| 328 | Patient045A  | Patient092D  |
| 328 | Patient045B  | Patient092A  |
| 328 | Patient074D  | Patient217I  |
| 328 | Patient081A1 | Patient103C  |
| 328 | Patient103A  | Patient251   |
| 328 | Patient123A  | Patient150C  |
| 328 | Patient123B  | Patient217J  |
| 328 | Patient123C  | Patient217J  |
| 328 | Patient123D  | Patient258D  |
| 328 | Patient173A  | Patient251   |
| 328 | Patient181B  | Patient261A  |
| 328 | Patient189E  | Patient236B  |
| 328 | Patient217H  | Patient251   |
| 328 | Patient230A  | Patient258G  |
| 328 | Patient230D  | Patient258D  |
| 329 | Patient026E  | Patient230B  |
| 329 | Patient026F  | Patient141A  |
| 329 | Patient045A  | Patient235E  |
| 329 | Patient045C  | Patient235F  |
| 329 | Patient081B  | Patient103C  |
| 329 | Patient081D  | Patient103B  |
| 329 | Patient103A  | Patient258E  |
| 329 | Patient123D  | Patient258A1 |
| 329 | Patient123D  | Patient258A2 |
| 329 | Patient123D  | Patient258F  |
| 329 | Patient181B  | Patient251   |
| 329 | Patient184   | Patient189E  |
| 329 | Patient189B  | Patient236A  |
| 329 | Patient217A  | Patient251   |
| 329 | Patient224A  | Patient258E  |
| 329 | Patient230A  | Patient258D  |
| 329 | Patient230D  | Patient258A1 |
| 329 | Patient230D  | Patient258A2 |
| 329 | Patient230D  | Patient258F  |
| 329 | Patient251   | Patient261D  |
| 330 | Patient023   | Patient246D  |
| 330 | Patient026B  | Patient230A  |
| 330 | Patient026F  | Patient230A  |
| 330 | Patient045A  | Patient092B  |
| 330 | Patient045B  | Patient092D  |
| 330 | Patient045B  | Patient235E  |

|     |              |              |
|-----|--------------|--------------|
| 330 | Patient058   | Patient088   |
| 330 | Patient081A2 | Patient103C  |
| 330 | Patient081B  | Patient224A  |
| 330 | Patient081C  | Patient103B  |
| 330 | Patient123C  | Patient150B  |
| 330 | Patient150A  | Patient192A  |
| 330 | Patient150B  | Patient192A  |
| 330 | Patient173B  | Patient251   |
| 330 | Patient230A  | Patient258A1 |
| 330 | Patient230A  | Patient258A2 |
| 330 | Patient230A  | Patient258F  |
| 331 | Patient026B  | Patient141A  |
| 331 | Patient045A  | Patient092E  |
| 331 | Patient045B  | Patient092E  |
| 331 | Patient045C  | Patient092A  |
| 331 | Patient081A2 | Patient224A  |
| 331 | Patient120D  | Patient177   |
| 331 | Patient123B  | Patient150B  |
| 331 | Patient123C  | Patient150A  |
| 331 | Patient123D  | Patient217I  |
| 331 | Patient157   | Patient189B  |
| 331 | Patient184   | Patient189A  |
| 331 | Patient184   | Patient189B  |
| 331 | Patient189A  | Patient236A  |
| 331 | Patient189B  | Patient265   |
| 331 | Patient189E  | Patient236A  |
| 331 | Patient230B  | Patient251   |
| 332 | Patient026D  | Patient251   |
| 332 | Patient045A  | Patient092H  |
| 332 | Patient045B  | Patient092B  |
| 332 | Patient074D  | Patient217J  |
| 332 | Patient081A1 | Patient224A  |
| 332 | Patient081C  | Patient123D  |
| 332 | Patient081F  | Patient103C  |
| 332 | Patient100A  | Patient252F  |
| 332 | Patient123A  | Patient183B  |
| 332 | Patient123B  | Patient150A  |
| 332 | Patient123C  | Patient150C  |
| 332 | Patient173A  | Patient258E  |
| 332 | Patient177   | Patient192A  |
| 332 | Patient177   | Patient235B  |
| 332 | Patient177   | Patient235C  |
| 332 | Patient230B  | Patient261D  |
| 333 | Patient021A2 | Patient100A  |
| 333 | Patient045C  | Patient092B  |
| 333 | Patient045C  | Patient092D  |
| 333 | Patient045C  | Patient235E  |
| 333 | Patient081C  | Patient103D  |
| 333 | Patient081E  | Patient103C  |
| 333 | Patient120B  | Patient177   |

|     |              |              |
|-----|--------------|--------------|
| 333 | Patient120C  | Patient177   |
| 333 | Patient123A  | Patient183C  |
| 333 | Patient150A  | Patient192C  |
| 333 | Patient177   | Patient192C  |
| 333 | Patient177   | Patient235F  |
| 333 | Patient181B  | Patient261D  |
| 333 | Patient189A  | Patient265   |
| 334 | Patient026B  | Patient230B  |
| 334 | Patient026B  | Patient230E  |
| 334 | Patient026B  | Patient230F  |
| 334 | Patient026C  | Patient195   |
| 334 | Patient026E  | Patient145B  |
| 334 | Patient026F  | Patient230B  |
| 334 | Patient026F  | Patient230E  |
| 334 | Patient026F  | Patient230F  |
| 334 | Patient026F  | Patient251   |
| 334 | Patient045A  | Patient092G  |
| 334 | Patient045B  | Patient092H  |
| 334 | Patient045C  | Patient092E  |
| 334 | Patient074E  | Patient217I  |
| 334 | Patient081D  | Patient103D  |
| 334 | Patient081D  | Patient123D  |
| 334 | Patient081E  | Patient224A  |
| 334 | Patient081F  | Patient224A  |
| 334 | Patient103A  | Patient258G  |
| 334 | Patient123B  | Patient150C  |
| 334 | Patient141C  | Patient261B  |
| 334 | Patient150B  | Patient192C  |
| 334 | Patient150C  | Patient192A  |
| 334 | Patient217I  | Patient251   |
| 334 | Patient224B  | Patient258B  |
| 334 | Patient224B  | Patient258G  |
| 334 | Patient230B  | Patient258B  |
| 334 | Patient251   | Patient261G  |
| 335 | Patient021A2 | Patient079A1 |
| 335 | Patient026C  | Patient251   |
| 335 | Patient074A  | Patient103C  |
| 335 | Patient074B  | Patient103C  |
| 335 | Patient081A1 | Patient103D  |
| 335 | Patient081B  | Patient103B  |
| 335 | Patient103A  | Patient258B  |
| 335 | Patient123D  | Patient217J  |
| 335 | Patient141B  | Patient261B  |
| 335 | Patient150C  | Patient192C  |
| 335 | Patient157   | Patient189A  |
| 335 | Patient189B  | Patient263B  |
| 335 | Patient189E  | Patient265   |
| 335 | Patient224B  | Patient258F  |
| 335 | Patient230B  | Patient258G  |
| 336 | Patient021A1 | Patient100A  |



|     |              |              |
|-----|--------------|--------------|
| 336 | Patient021A2 | Patient079A2 |
| 336 | Patient021A2 | Patient079C  |
| 336 | Patient026B  | Patient251   |
| 336 | Patient032D  | Patient261B  |
| 336 | Patient045B  | Patient092G  |
| 336 | Patient045C  | Patient092H  |
| 336 | Patient081A2 | Patient103B  |
| 336 | Patient081B  | Patient103D  |
| 336 | Patient103A  | Patient258D  |
| 336 | Patient123A  | Patient183A  |
| 336 | Patient123A  | Patient183E  |
| 336 | Patient123B  | Patient183C  |
| 336 | Patient123C  | Patient183B  |
| 336 | Patient123C  | Patient183C  |
| 336 | Patient141C  | Patient261A  |
| 336 | Patient141D  | Patient261B  |
| 336 | Patient150B  | Patient192B  |
| 336 | Patient173B  | Patient258E  |
| 336 | Patient224B  | Patient258D  |
| 336 | Patient230B  | Patient258D  |
| 337 | Patient021A1 | Patient079A1 |
| 337 | Patient026E  | Patient251   |
| 337 | Patient026F  | Patient145B  |
| 337 | Patient081A1 | Patient103B  |
| 337 | Patient081A2 | Patient103D  |
| 337 | Patient103A  | Patient258A1 |
| 337 | Patient103A  | Patient258A2 |
| 337 | Patient123B  | Patient183B  |
| 337 | Patient123D  | Patient150A  |
| 337 | Patient123D  | Patient150B  |
| 337 | Patient123D  | Patient150C  |
| 337 | Patient150A  | Patient192B  |
| 337 | Patient157   | Patient189E  |
| 337 | Patient177   | Patient235E  |
| 337 | Patient183C  | Patient251   |
| 337 | Patient189A  | Patient263B  |
| 337 | Patient217J  | Patient251   |
| 337 | Patient224B  | Patient258A1 |
| 337 | Patient224B  | Patient258A2 |
| 337 | Patient230B  | Patient258A1 |
| 337 | Patient230B  | Patient258A2 |
| 337 | Patient230B  | Patient258F  |
| 337 | Patient251   | Patient258B  |
| 337 | Patient251   | Patient258G  |
| 338 | Patient021A1 | Patient079A2 |
| 338 | Patient021A1 | Patient079C  |
| 338 | Patient026A  | Patient145B  |
| 338 | Patient026B  | Patient145B  |
| 338 | Patient045C  | Patient092G  |
| 338 | Patient074E  | Patient217J  |

|     |              |              |
|-----|--------------|--------------|
| 338 | Patient081C  | Patient103E  |
| 338 | Patient103A  | Patient258F  |
| 338 | Patient141B  | Patient261A  |
| 338 | Patient251   | Patient258E  |
| 339 | Patient026A  | Patient251   |
| 339 | Patient032D  | Patient261A  |
| 339 | Patient074C  | Patient103C  |
| 339 | Patient081A1 | Patient103E  |
| 339 | Patient081D  | Patient103E  |
| 339 | Patient081F  | Patient103D  |
| 339 | Patient141D  | Patient261A  |
| 339 | Patient177   | Patient192B  |
| 339 | Patient189E  | Patient263B  |
| 339 | Patient251   | Patient258A2 |
| 339 | Patient251   | Patient258D  |
| 340 | Patient021A2 | Patient079B  |
| 340 | Patient021A2 | Patient126D  |
| 340 | Patient074B  | Patient103B  |
| 340 | Patient081B  | Patient103E  |
| 340 | Patient081E  | Patient103B  |
| 340 | Patient081E  | Patient103D  |
| 340 | Patient081F  | Patient103B  |
| 340 | Patient123A  | Patient183D  |
| 340 | Patient123C  | Patient183A  |
| 340 | Patient123D  | Patient183B  |
| 340 | Patient141A  | Patient261B  |
| 340 | Patient150C  | Patient192B  |
| 340 | Patient183B  | Patient251   |
| 340 | Patient251   | Patient258A1 |
| 341 | Patient026A  | Patient224B  |
| 341 | Patient074B  | Patient261B  |
| 341 | Patient081A2 | Patient103E  |
| 341 | Patient123B  | Patient183A  |
| 341 | Patient123C  | Patient183E  |
| 341 | Patient123D  | Patient183C  |
| 341 | Patient141C  | Patient261D  |
| 341 | Patient251   | Patient258F  |
| 342 | Patient074A  | Patient103B  |
| 342 | Patient074B  | Patient258B  |
| 342 | Patient100A  | Patient108A  |
| 342 | Patient123A  | Patient177   |
| 342 | Patient141C  | Patient258B  |
| 342 | Patient141C  | Patient258G  |
| 343 | Patient026A  | Patient181A  |
| 343 | Patient026D  | Patient145C  |
| 343 | Patient032A  | Patient261B  |
| 343 | Patient032D  | Patient261D  |
| 343 | Patient038   | Patient054   |
| 343 | Patient074B  | Patient258G  |
| 343 | Patient079A1 | Patient100A  |

|     |              |              |
|-----|--------------|--------------|
| 343 | Patient103C  | Patient217C  |
| 343 | Patient103C  | Patient261B  |
| 343 | Patient123B  | Patient183E  |
| 343 | Patient141A  | Patient261A  |
| 343 | Patient141B  | Patient261D  |
| 343 | Patient183E  | Patient251   |
| 343 | Patient224B  | Patient258E  |
| 344 | Patient021A1 | Patient079B  |
| 344 | Patient021A1 | Patient126D  |
| 344 | Patient045A  | Patient123A  |
| 344 | Patient074A  | Patient258G  |
| 344 | Patient074B  | Patient261A  |
| 344 | Patient079A2 | Patient100A  |
| 344 | Patient079C  | Patient100A  |
| 344 | Patient081E  | Patient103E  |
| 344 | Patient103C  | Patient217F  |
| 344 | Patient123A  | Patient145B  |
| 344 | Patient123C  | Patient183D  |
| 344 | Patient123D  | Patient183E  |
| 344 | Patient141B  | Patient258B  |
| 344 | Patient141C  | Patient258D  |
| 344 | Patient141D  | Patient261D  |
| 344 | Patient167   | Patient258B  |
| 344 | Patient167   | Patient258G  |
| 344 | Patient183A  | Patient251   |
| 344 | Patient183C  | Patient217C  |
| 345 | Patient026A  | Patient141B  |
| 345 | Patient026A  | Patient141C  |
| 345 | Patient045B  | Patient123A  |
| 345 | Patient074A  | Patient258B  |
| 345 | Patient074B  | Patient258A1 |
| 345 | Patient074B  | Patient258A2 |
| 345 | Patient074B  | Patient258D  |
| 345 | Patient074B  | Patient258E  |
| 345 | Patient081F  | Patient103E  |
| 345 | Patient103C  | Patient217D  |
| 345 | Patient103C  | Patient261A  |
| 345 | Patient123B  | Patient183D  |
| 345 | Patient141B  | Patient258G  |
| 345 | Patient141C  | Patient258A2 |
| 345 | Patient141C  | Patient258F  |
| 345 | Patient183B  | Patient217C  |
| 346 | Patient026D  | Patient181A  |
| 346 | Patient034A  | Patient261B  |
| 346 | Patient074A  | Patient258D  |
| 346 | Patient074A  | Patient261B  |
| 346 | Patient074B  | Patient258F  |
| 346 | Patient074C  | Patient103B  |
| 346 | Patient081C  | Patient181A  |
| 346 | Patient100A  | Patient108D  |

|     |              |              |
|-----|--------------|--------------|
| 346 | Patient100A  | Patient109A  |
| 346 | Patient103A  | Patient261B  |
| 346 | Patient103C  | Patient217B  |
| 346 | Patient103C  | Patient217E  |
| 346 | Patient123C  | Patient177   |
| 346 | Patient123D  | Patient183A  |
| 346 | Patient141B  | Patient258D  |
| 346 | Patient141C  | Patient258A1 |
| 346 | Patient145C  | Patient173A  |
| 346 | Patient167   | Patient258D  |
| 346 | Patient183B  | Patient217D  |
| 346 | Patient183C  | Patient217D  |
| 346 | Patient183D  | Patient251   |
| 347 | Patient026C  | Patient167   |
| 347 | Patient032A  | Patient261A  |
| 347 | Patient032B  | Patient261B  |
| 347 | Patient074A  | Patient261A  |
| 347 | Patient074C  | Patient258G  |
| 347 | Patient074D  | Patient103C  |
| 347 | Patient079A1 | Patient149A  |
| 347 | Patient081D  | Patient181A  |
| 347 | Patient103C  | Patient217A  |
| 347 | Patient103C  | Patient217H  |
| 347 | Patient123B  | Patient177   |
| 347 | Patient141B  | Patient258A1 |
| 347 | Patient141B  | Patient258A2 |
| 347 | Patient141B  | Patient258F  |
| 347 | Patient167   | Patient258A1 |
| 347 | Patient183B  | Patient217A  |
| 347 | Patient183B  | Patient217B  |
| 347 | Patient183C  | Patient217A  |
| 347 | Patient183C  | Patient217B  |
| 347 | Patient183C  | Patient217E  |
| 347 | Patient183C  | Patient217F  |
| 347 | Patient192A  | Patient213A  |
| 347 | Patient192C  | Patient213A  |
| 348 | Patient026A  | Patient230A  |
| 348 | Patient045A  | Patient123C  |
| 348 | Patient045B  | Patient123B  |
| 348 | Patient045B  | Patient123C  |
| 348 | Patient045C  | Patient123A  |
| 348 | Patient053A1 | Patient145B  |
| 348 | Patient074A  | Patient258A1 |
| 348 | Patient074A  | Patient258A2 |
| 348 | Patient074A  | Patient258E  |
| 348 | Patient074A  | Patient258F  |
| 348 | Patient074C  | Patient258B  |
| 348 | Patient079C  | Patient149A  |
| 348 | Patient103A  | Patient261A  |
| 348 | Patient103B  | Patient261B  |

|     |              |              |
|-----|--------------|--------------|
| 348 | Patient121A  | Patient183C  |
| 348 | Patient123A  | Patient145C  |
| 348 | Patient123B  | Patient145B  |
| 348 | Patient123C  | Patient145B  |
| 348 | Patient123D  | Patient183D  |
| 348 | Patient141A  | Patient258B  |
| 348 | Patient141A  | Patient261D  |
| 348 | Patient167   | Patient258A2 |
| 348 | Patient167   | Patient258F  |
| 348 | Patient183B  | Patient217E  |
| 348 | Patient183B  | Patient217H  |
| 348 | Patient183C  | Patient217H  |
| 348 | Patient183C  | Patient258G  |
| 348 | Patient230E  | Patient258E  |
| 349 | Patient026A  | Patient141A  |
| 349 | Patient034A  | Patient261A  |
| 349 | Patient034E  | Patient261B  |
| 349 | Patient045A  | Patient123B  |
| 349 | Patient074B  | Patient261D  |
| 349 | Patient074C  | Patient258D  |
| 349 | Patient079A2 | Patient149A  |
| 349 | Patient100A  | Patient108B1 |
| 349 | Patient103B  | Patient217C  |
| 349 | Patient121A  | Patient183B  |
| 349 | Patient141A  | Patient258G  |
| 349 | Patient145C  | Patient173B  |
| 349 | Patient183B  | Patient217F  |
| 349 | Patient183C  | Patient258B  |
| 349 | Patient213A  | Patient235F  |
| 349 | Patient230A  | Patient258E  |
| 349 | Patient230D  | Patient258E  |
| 349 | Patient230F  | Patient258E  |
| 350 | Patient026A  | Patient181B  |
| 350 | Patient032B  | Patient261A  |
| 350 | Patient034B  | Patient261B  |
| 350 | Patient074C  | Patient258A2 |
| 350 | Patient074C  | Patient261B  |
| 350 | Patient079B  | Patient149A  |
| 350 | Patient100A  | Patient109B  |
| 350 | Patient103B  | Patient217D  |
| 350 | Patient103C  | Patient261D  |
| 350 | Patient121B  | Patient183C  |
| 350 | Patient141A  | Patient258D  |
| 350 | Patient145B  | Patient173A  |
| 350 | Patient183A  | Patient217C  |
| 350 | Patient183C  | Patient258D  |
| 351 | Patient026C  | Patient183C  |
| 351 | Patient026E  | Patient145C  |
| 351 | Patient032A  | Patient261D  |
| 351 | Patient034D  | Patient261B  |

|     |              |              |
|-----|--------------|--------------|
| 351 | Patient045C  | Patient123B  |
| 351 | Patient045C  | Patient123C  |
| 351 | Patient074C  | Patient258A1 |
| 351 | Patient074C  | Patient258E  |
| 351 | Patient074C  | Patient258F  |
| 351 | Patient074C  | Patient261A  |
| 351 | Patient074E  | Patient103C  |
| 351 | Patient079B  | Patient100A  |
| 351 | Patient100A  | Patient108B2 |
| 351 | Patient100A  | Patient108G  |
| 351 | Patient100A  | Patient108H  |
| 351 | Patient103B  | Patient217B  |
| 351 | Patient121B  | Patient183B  |
| 351 | Patient141A  | Patient258A1 |
| 351 | Patient141A  | Patient258A2 |
| 351 | Patient141A  | Patient258F  |
| 351 | Patient141C  | Patient258E  |
| 351 | Patient183A  | Patient217D  |
| 351 | Patient183A  | Patient258B  |
| 351 | Patient183A  | Patient258G  |
| 351 | Patient183B  | Patient258B  |
| 351 | Patient183D  | Patient217C  |
| 351 | Patient183E  | Patient217C  |
| 351 | Patient183E  | Patient217D  |
| 352 | Patient021A2 | Patient097A  |
| 352 | Patient026A  | Patient230B  |
| 352 | Patient026A  | Patient230F  |
| 352 | Patient026B  | Patient230D  |
| 352 | Patient026C  | Patient183B  |
| 352 | Patient026F  | Patient145C  |
| 352 | Patient034D  | Patient261A  |
| 352 | Patient034E  | Patient261A  |
| 352 | Patient053A1 | Patient251   |
| 352 | Patient053A2 | Patient251   |
| 352 | Patient074A  | Patient261D  |
| 352 | Patient074D  | Patient103B  |
| 352 | Patient089A1 | Patient193   |
| 352 | Patient103A  | Patient261D  |
| 352 | Patient103B  | Patient217A  |
| 352 | Patient103B  | Patient217E  |
| 352 | Patient103B  | Patient217H  |
| 352 | Patient103B  | Patient261A  |
| 352 | Patient108B1 | Patient126D  |
| 352 | Patient121A  | Patient183E  |
| 352 | Patient123B  | Patient145C  |
| 352 | Patient123C  | Patient145C  |
| 352 | Patient123D  | Patient145B  |
| 352 | Patient123D  | Patient177   |
| 352 | Patient150B  | Patient192F  |
| 352 | Patient183A  | Patient217A  |

|     |              |              |
|-----|--------------|--------------|
| 352 | Patient183A  | Patient217B  |
| 352 | Patient183A  | Patient258D  |
| 352 | Patient183B  | Patient258G  |
| 352 | Patient183C  | Patient258A1 |
| 352 | Patient183C  | Patient258A2 |
| 352 | Patient183C  | Patient258F  |
| 352 | Patient183D  | Patient217D  |
| 352 | Patient183E  | Patient217A  |
| 353 | Patient026A  | Patient230E  |
| 353 | Patient026B  | Patient145C  |
| 353 | Patient026D  | Patient181B  |
| 353 | Patient026E  | Patient181A  |
| 353 | Patient026F  | Patient230D  |
| 353 | Patient034B  | Patient261A  |
| 353 | Patient034C  | Patient261B  |
| 353 | Patient045A  | Patient123D  |
| 353 | Patient045A  | Patient213A  |
| 353 | Patient053C  | Patient251   |
| 353 | Patient103B  | Patient217F  |
| 353 | Patient108B2 | Patient126D  |
| 353 | Patient121A  | Patient183A  |
| 353 | Patient141B  | Patient258E  |
| 353 | Patient145B  | Patient173B  |
| 353 | Patient150A  | Patient192F  |
| 353 | Patient150B  | Patient192E  |
| 353 | Patient177   | Patient192E  |
| 353 | Patient183A  | Patient217E  |
| 353 | Patient183A  | Patient217H  |
| 353 | Patient183A  | Patient258A2 |
| 353 | Patient183A  | Patient258F  |
| 353 | Patient183B  | Patient258D  |
| 353 | Patient183D  | Patient217A  |
| 353 | Patient183D  | Patient217B  |
| 353 | Patient183E  | Patient217B  |
| 353 | Patient183E  | Patient217E  |
| 353 | Patient183E  | Patient217H  |
| 353 | Patient183E  | Patient258B  |
| 353 | Patient183E  | Patient258G  |
| 353 | Patient195   | Patient261B  |
| 353 | Patient213A  | Patient235E  |
| 353 | Patient230B  | Patient258E  |
| 354 | Patient034A  | Patient261D  |
| 354 | Patient045B  | Patient123D  |
| 354 | Patient053B  | Patient251   |
| 354 | Patient081A2 | Patient181A  |
| 354 | Patient081B  | Patient181A  |
| 354 | Patient121B  | Patient183E  |
| 354 | Patient150A  | Patient192E  |
| 354 | Patient167   | Patient235A  |
| 354 | Patient183A  | Patient217F  |

|     |              |              |
|-----|--------------|--------------|
| 354 | Patient183A  | Patient258A1 |
| 354 | Patient183B  | Patient217I  |
| 354 | Patient183B  | Patient258A1 |
| 354 | Patient183B  | Patient258A2 |
| 354 | Patient183B  | Patient258F  |
| 354 | Patient183C  | Patient217I  |
| 354 | Patient183D  | Patient217E  |
| 354 | Patient183D  | Patient217H  |
| 354 | Patient183E  | Patient217F  |
| 354 | Patient192B  | Patient213A  |
| 355 | Patient021A2 | Patient097C  |
| 355 | Patient026A  | Patient145C  |
| 355 | Patient026D  | Patient145A  |
| 355 | Patient026D  | Patient258B  |
| 355 | Patient032B  | Patient261D  |
| 355 | Patient045B  | Patient213A  |
| 355 | Patient074D  | Patient258B  |
| 355 | Patient081C  | Patient181B  |
| 355 | Patient089A2 | Patient193   |
| 355 | Patient103C  | Patient217I  |
| 355 | Patient121A  | Patient183D  |
| 355 | Patient121B  | Patient183A  |
| 355 | Patient150C  | Patient192F  |
| 355 | Patient177   | Patient192F  |
| 355 | Patient183D  | Patient217F  |
| 355 | Patient183E  | Patient258A2 |
| 355 | Patient183E  | Patient258D  |
| 355 | Patient195   | Patient261A  |
| 356 | Patient021A1 | Patient097A  |
| 356 | Patient021A2 | Patient097D  |
| 356 | Patient026C  | Patient183A  |
| 356 | Patient026C  | Patient183E  |
| 356 | Patient026D  | Patient258G  |
| 356 | Patient034C  | Patient261A  |
| 356 | Patient045C  | Patient213A  |
| 356 | Patient074C  | Patient261D  |
| 356 | Patient074D  | Patient258G  |
| 356 | Patient074D  | Patient261B  |
| 356 | Patient074E  | Patient103B  |
| 356 | Patient081A1 | Patient181A  |
| 356 | Patient081D  | Patient181B  |
| 356 | Patient100A  | Patient109C  |
| 356 | Patient103B  | Patient261D  |
| 356 | Patient123D  | Patient145C  |
| 356 | Patient126A  | Patient145C  |
| 356 | Patient150C  | Patient192E  |
| 356 | Patient173A  | Patient258B  |
| 356 | Patient183C  | Patient258E  |
| 356 | Patient183E  | Patient258F  |
| 356 | Patient189B  | Patient213B  |



|     |              |              |
|-----|--------------|--------------|
| 357 | Patient026C  | Patient183D  |
| 357 | Patient026D  | Patient183C  |
| 357 | Patient026D  | Patient258D  |
| 357 | Patient032E  | Patient053A1 |
| 357 | Patient032E  | Patient123A  |
| 357 | Patient034D  | Patient261D  |
| 357 | Patient034E  | Patient261D  |
| 357 | Patient045A  | Patient121A  |
| 357 | Patient045C  | Patient123D  |
| 357 | Patient074D  | Patient258D  |
| 357 | Patient100A  | Patient108F  |
| 357 | Patient100A  | Patient109E  |
| 357 | Patient103C  | Patient217J  |
| 357 | Patient121B  | Patient183D  |
| 357 | Patient141A  | Patient258E  |
| 357 | Patient173A  | Patient258G  |
| 357 | Patient183A  | Patient258E  |
| 357 | Patient183E  | Patient258A1 |
| 357 | Patient189E  | Patient213B  |
| 358 | Patient021A2 | Patient097E  |
| 358 | Patient026D  | Patient183B  |
| 358 | Patient026D  | Patient258A1 |
| 358 | Patient026D  | Patient258A2 |
| 358 | Patient026D  | Patient258F  |
| 358 | Patient026F  | Patient181A  |
| 358 | Patient034B  | Patient261D  |
| 358 | Patient045B  | Patient121A  |
| 358 | Patient074D  | Patient258A1 |
| 358 | Patient074D  | Patient258A2 |
| 358 | Patient074D  | Patient258E  |
| 358 | Patient074D  | Patient258F  |
| 358 | Patient097A  | Patient252B  |
| 358 | Patient100A  | Patient109D  |
| 358 | Patient126C  | Patient145C  |
| 358 | Patient173A  | Patient258D  |
| 358 | Patient183B  | Patient258E  |
| 358 | Patient183C  | Patient217J  |
| 358 | Patient183D  | Patient258B  |
| 358 | Patient183D  | Patient258G  |
| 358 | Patient189A  | Patient213B  |
| 359 | Patient021A1 | Patient097C  |
| 359 | Patient021A1 | Patient097D  |
| 359 | Patient021A1 | Patient097E  |
| 359 | Patient074D  | Patient261A  |
| 359 | Patient074E  | Patient258B  |
| 359 | Patient081E  | Patient181A  |
| 359 | Patient081F  | Patient181A  |
| 359 | Patient145A  | Patient173A  |
| 359 | Patient173A  | Patient258A2 |
| 359 | Patient173A  | Patient258F  |

|     |              |              |
|-----|--------------|--------------|
| 359 | Patient183A  | Patient217I  |
| 359 | Patient183D  | Patient258A2 |
| 359 | Patient183D  | Patient258D  |
| 359 | Patient183E  | Patient217I  |
| 359 | Patient183E  | Patient258E  |
| 359 | Patient195   | Patient261D  |
| 360 | Patient026D  | Patient183E  |
| 360 | Patient026E  | Patient181B  |
| 360 | Patient032D  | Patient123A  |
| 360 | Patient066D  | Patient258E  |
| 360 | Patient097C  | Patient252B  |
| 360 | Patient103B  | Patient217I  |
| 360 | Patient121A  | Patient145B  |
| 360 | Patient123A  | Patient213A  |
| 360 | Patient126D  | Patient149A  |
| 360 | Patient173A  | Patient258A1 |
| 360 | Patient173B  | Patient258B  |
| 360 | Patient183B  | Patient217J  |
| 360 | Patient183D  | Patient217I  |
| 360 | Patient183D  | Patient258F  |
| 360 | Patient195   | Patient224A  |
| 361 | Patient026B  | Patient181A  |
| 361 | Patient032E  | Patient123C  |
| 361 | Patient034C  | Patient261D  |
| 361 | Patient045C  | Patient121A  |
| 361 | Patient074E  | Patient258G  |
| 361 | Patient123A  | Patient145A  |
| 361 | Patient126A  | Patient145B  |
| 361 | Patient167   | Patient217C  |
| 361 | Patient167   | Patient258E  |
| 361 | Patient173B  | Patient258G  |
| 361 | Patient183D  | Patient258A1 |
| 362 | Patient021A2 | Patient097B  |
| 362 | Patient021A2 | Patient252B  |
| 362 | Patient026D  | Patient183A  |
| 362 | Patient026E  | Patient258B  |
| 362 | Patient032C  | Patient123A  |
| 362 | Patient074E  | Patient258A2 |
| 362 | Patient074E  | Patient261B  |
| 362 | Patient097A  | Patient252A  |
| 362 | Patient097D  | Patient252B  |
| 362 | Patient108A  | Patient189B  |
| 362 | Patient145A  | Patient173B  |
| 362 | Patient167   | Patient217D  |
| 362 | Patient173B  | Patient258D  |
| 362 | Patient189A  | Patient252D  |
| 362 | Patient195   | Patient224B  |
| 362 | Patient217C  | Patient261B  |
| 363 | Patient026E  | Patient258G  |
| 363 | Patient032C  | Patient053A1 |

|     |              |              |
|-----|--------------|--------------|
| 363 | Patient074B  | Patient081A2 |
| 363 | Patient074E  | Patient258A1 |
| 363 | Patient074E  | Patient258D  |
| 363 | Patient081B  | Patient181B  |
| 363 | Patient088   | Patient193   |
| 363 | Patient108A  | Patient189A  |
| 363 | Patient108A  | Patient189E  |
| 363 | Patient108D  | Patient189A  |
| 363 | Patient108D  | Patient189B  |
| 363 | Patient161B  | Patient181A  |
| 363 | Patient167   | Patient217B  |
| 363 | Patient173B  | Patient258A1 |
| 363 | Patient173B  | Patient258F  |
| 363 | Patient217D  | Patient261B  |
| 364 | Patient026D  | Patient183D  |
| 364 | Patient026E  | Patient145A  |
| 364 | Patient026E  | Patient258D  |
| 364 | Patient032D  | Patient123C  |
| 364 | Patient032D  | Patient173A  |
| 364 | Patient032E  | Patient123B  |
| 364 | Patient066D  | Patient123A  |
| 364 | Patient074B  | Patient081B  |
| 364 | Patient074D  | Patient261D  |
| 364 | Patient074E  | Patient258E  |
| 364 | Patient074E  | Patient258F  |
| 364 | Patient081A2 | Patient181B  |
| 364 | Patient093B  | Patient189B  |
| 364 | Patient100A  | Patient131   |
| 364 | Patient103B  | Patient217J  |
| 364 | Patient108D  | Patient189E  |
| 364 | Patient123A  | Patient230G  |
| 364 | Patient123B  | Patient213A  |
| 364 | Patient123C  | Patient213A  |
| 364 | Patient126C  | Patient145B  |
| 364 | Patient159   | Patient189B  |
| 364 | Patient167   | Patient217A  |
| 364 | Patient167   | Patient217E  |
| 364 | Patient167   | Patient217F  |
| 364 | Patient173B  | Patient258A2 |
| 364 | Patient183D  | Patient258E  |
| 364 | Patient189B  | Patient252D  |
| 364 | Patient217B  | Patient261B  |
| 364 | Patient217C  | Patient261A  |
| 365 | Patient021A1 | Patient097B  |
| 365 | Patient021A1 | Patient252B  |
| 365 | Patient021A2 | Patient149A  |
| 365 | Patient026E  | Patient183C  |
| 365 | Patient026E  | Patient258A1 |
| 365 | Patient026E  | Patient258A2 |
| 365 | Patient026E  | Patient258F  |

|     |              |              |
|-----|--------------|--------------|
| 365 | Patient026F  | Patient181B  |
| 365 | Patient032A  | Patient123A  |
| 365 | Patient032C  | Patient123C  |
| 365 | Patient053A1 | Patient167   |
| 365 | Patient074B  | Patient081A1 |
| 365 | Patient074E  | Patient261A  |
| 365 | Patient081A1 | Patient181B  |
| 365 | Patient097A  | Patient252F  |
| 365 | Patient097C  | Patient252A  |
| 365 | Patient097D  | Patient252A  |
| 365 | Patient097E  | Patient252B  |
| 365 | Patient108A  | Patient126D  |
| 365 | Patient108D  | Patient126D  |
| 365 | Patient109B  | Patient189B  |
| 365 | Patient123C  | Patient145A  |
| 365 | Patient145B  | Patient192D  |
| 365 | Patient167   | Patient217H  |
| 365 | Patient183A  | Patient217J  |
| 365 | Patient183E  | Patient217J  |
| 365 | Patient189E  | Patient252D  |
| 365 | Patient217A  | Patient261B  |
| 365 | Patient217E  | Patient261B  |
| 365 | Patient217H  | Patient261B  |
| 366 | Patient021A1 | Patient252A  |
| 366 | Patient026B  | Patient066D  |
| 366 | Patient026E  | Patient183B  |
| 366 | Patient026F  | Patient066D  |
| 366 | Patient026F  | Patient145A  |
| 366 | Patient066E  | Patient258E  |
| 366 | Patient074A  | Patient081A2 |
| 366 | Patient081F  | Patient181B  |
| 366 | Patient097A  | Patient189A  |
| 366 | Patient097A  | Patient189B  |
| 366 | Patient097A  | Patient189E  |
| 366 | Patient097E  | Patient252A  |
| 366 | Patient123B  | Patient145A  |
| 366 | Patient159   | Patient189A  |
| 366 | Patient183D  | Patient217J  |
| 366 | Patient217D  | Patient261A  |
| 366 | Patient217F  | Patient261B  |
| 367 | Patient021A2 | Patient252A  |
| 367 | Patient026B  | Patient145A  |
| 367 | Patient026B  | Patient177   |
| 367 | Patient026B  | Patient181B  |
| 367 | Patient026F  | Patient177   |
| 367 | Patient032C  | Patient123B  |
| 367 | Patient032D  | Patient123B  |
| 367 | Patient032D  | Patient173B  |
| 367 | Patient032E  | Patient123D  |
| 367 | Patient032E  | Patient173A  |

|     |              |              |
|-----|--------------|--------------|
| 367 | Patient045D  | Patient100A  |
| 367 | Patient066D  | Patient258B  |
| 367 | Patient066D  | Patient258G  |
| 367 | Patient074A  | Patient081B  |
| 367 | Patient074B  | Patient081D  |
| 367 | Patient079C  | Patient131   |
| 367 | Patient081D  | Patient161B  |
| 367 | Patient093B  | Patient189A  |
| 367 | Patient093B  | Patient189E  |
| 367 | Patient097B  | Patient252B  |
| 367 | Patient097C  | Patient252F  |
| 367 | Patient108G  | Patient189A  |
| 367 | Patient108G  | Patient189B  |
| 367 | Patient108H  | Patient189B  |
| 367 | Patient109A  | Patient189B  |
| 367 | Patient121A  | Patient150A  |
| 367 | Patient123B  | Patient230G  |
| 367 | Patient159   | Patient189E  |
| 367 | Patient177   | Patient235A  |
| 367 | Patient189A  | Patient222B  |
| 367 | Patient189B  | Patient222B  |
| 367 | Patient217B  | Patient261A  |
| 367 | Patient217E  | Patient261A  |
| 367 | Patient217F  | Patient261A  |
| 368 | Patient026A  | Patient145A  |
| 368 | Patient026A  | Patient177   |
| 368 | Patient026E  | Patient183E  |
| 368 | Patient032D  | Patient123D  |
| 368 | Patient045A  | Patient121B  |
| 368 | Patient053A1 | Patient230G  |
| 368 | Patient066D  | Patient123B  |
| 368 | Patient066D  | Patient123C  |
| 368 | Patient066F  | Patient258E  |
| 368 | Patient074A  | Patient081A1 |
| 368 | Patient074B  | Patient081C  |
| 368 | Patient081E  | Patient181B  |
| 368 | Patient093C  | Patient189B  |
| 368 | Patient108G  | Patient189E  |
| 368 | Patient109A  | Patient189A  |
| 368 | Patient109A  | Patient189E  |
| 368 | Patient109B  | Patient189A  |
| 368 | Patient120A  | Patient167   |
| 368 | Patient121A  | Patient150B  |
| 368 | Patient121A  | Patient150C  |
| 368 | Patient123C  | Patient230G  |
| 368 | Patient189E  | Patient222B  |
| 368 | Patient192E  | Patient213A  |
| 368 | Patient195   | Patient217C  |
| 368 | Patient217A  | Patient261A  |
| 368 | Patient217H  | Patient261A  |

|     |              |              |
|-----|--------------|--------------|
| 369 | Patient026B  | Patient183C  |
| 369 | Patient026F  | Patient183C  |
| 369 | Patient032A  | Patient123C  |
| 369 | Patient045B  | Patient121B  |
| 369 | Patient066D  | Patient258D  |
| 369 | Patient074A  | Patient081C  |
| 369 | Patient074A  | Patient081D  |
| 369 | Patient074B  | Patient081F  |
| 369 | Patient081C  | Patient161B  |
| 369 | Patient093C  | Patient189A  |
| 369 | Patient094A  | Patient189A  |
| 369 | Patient094A  | Patient189B  |
| 369 | Patient097B  | Patient252A  |
| 369 | Patient097C  | Patient189B  |
| 369 | Patient109A  | Patient126D  |
| 369 | Patient123A  | Patient224B  |
| 369 | Patient123A  | Patient230C  |
| 369 | Patient123D  | Patient145A  |
| 369 | Patient126A  | Patient145A  |
| 369 | Patient126D  | Patient131   |
| 369 | Patient150B  | Patient167   |
| 369 | Patient192F  | Patient213A  |
| 370 | Patient021A1 | Patient149A  |
| 370 | Patient021A2 | Patient252F  |
| 370 | Patient026A  | Patient230D  |
| 370 | Patient026D  | Patient066D  |
| 370 | Patient026D  | Patient177   |
| 370 | Patient026E  | Patient183A  |
| 370 | Patient032E  | Patient173B  |
| 370 | Patient066D  | Patient258A1 |
| 370 | Patient066D  | Patient258A2 |
| 370 | Patient066D  | Patient258F  |
| 370 | Patient066E  | Patient123A  |
| 370 | Patient074A  | Patient081F  |
| 370 | Patient074B  | Patient081E  |
| 370 | Patient074C  | Patient081A2 |
| 370 | Patient074E  | Patient261D  |
| 370 | Patient093C  | Patient189E  |
| 370 | Patient093E  | Patient189A  |
| 370 | Patient093E  | Patient189B  |
| 370 | Patient097C  | Patient189A  |
| 370 | Patient097D  | Patient189A  |
| 370 | Patient097D  | Patient189B  |
| 370 | Patient097E  | Patient189B  |
| 370 | Patient097E  | Patient252F  |
| 370 | Patient108H  | Patient189A  |
| 370 | Patient108H  | Patient189E  |
| 370 | Patient109B  | Patient189E  |
| 370 | Patient109C  | Patient189B  |
| 370 | Patient123A  | Patient261C  |

|     |              |             |
|-----|--------------|-------------|
| 370 | Patient123A  | Patient261E |
| 370 | Patient123D  | Patient213A |
| 370 | Patient150A  | Patient167  |
| 370 | Patient150C  | Patient167  |
| 370 | Patient167   | Patient217I |
| 370 | Patient173A  | Patient230G |
| 370 | Patient195   | Patient217D |
| 370 | Patient195   | Patient217F |
| 370 | Patient217I  | Patient261B |
| 371 | Patient021A1 | Patient252F |
| 371 | Patient026B  | Patient066E |
| 371 | Patient026F  | Patient066E |
| 371 | Patient032B  | Patient123A |
| 371 | Patient045D  | Patient108A |
| 371 | Patient053C  | Patient150A |
| 371 | Patient066F  | Patient123A |
| 371 | Patient074C  | Patient081B |
| 371 | Patient079A1 | Patient131  |
| 371 | Patient079A2 | Patient131  |
| 371 | Patient081A2 | Patient161B |
| 371 | Patient081B  | Patient161B |
| 371 | Patient092A  | Patient192D |
| 371 | Patient092C  | Patient192D |
| 371 | Patient097C  | Patient189E |
| 371 | Patient097D  | Patient189E |
| 371 | Patient097D  | Patient252F |
| 371 | Patient097E  | Patient189A |
| 371 | Patient109B  | Patient126D |
| 371 | Patient109D  | Patient189A |
| 371 | Patient109E  | Patient189A |
| 371 | Patient109E  | Patient189E |
| 371 | Patient121B  | Patient145B |
| 371 | Patient123A  | Patient141G |
| 371 | Patient123A  | Patient224A |
| 371 | Patient195   | Patient217B |
| 371 | Patient195   | Patient217E |
| 371 | Patient195   | Patient217H |
| 371 | Patient217C  | Patient261D |
| 371 | Patient217D  | Patient261D |
| 372 | Patient026A  | Patient183C |
| 372 | Patient026B  | Patient066F |
| 372 | Patient026B  | Patient183B |
| 372 | Patient026D  | Patient121A |
| 372 | Patient026E  | Patient183D |
| 372 | Patient026F  | Patient066F |
| 372 | Patient026F  | Patient183B |
| 372 | Patient032C  | Patient123D |
| 372 | Patient032C  | Patient173A |
| 372 | Patient034A  | Patient123A |
| 372 | Patient045C  | Patient121B |

|     |              |              |
|-----|--------------|--------------|
| 372 | Patient053B  | Patient150A  |
| 372 | Patient053C  | Patient150B  |
| 372 | Patient066D  | Patient123D  |
| 372 | Patient066E  | Patient258G  |
| 372 | Patient074C  | Patient081A1 |
| 372 | Patient079B  | Patient131   |
| 372 | Patient089A1 | Patient114   |
| 372 | Patient089A2 | Patient114   |
| 372 | Patient093A  | Patient189A  |
| 372 | Patient094A  | Patient189E  |
| 372 | Patient100A  | Patient149A  |
| 372 | Patient108G  | Patient126D  |
| 372 | Patient109C  | Patient189A  |
| 372 | Patient109C  | Patient189E  |
| 372 | Patient109E  | Patient126D  |
| 372 | Patient109E  | Patient189B  |
| 372 | Patient126C  | Patient145A  |
| 372 | Patient161B  | Patient181B  |
| 372 | Patient195   | Patient217A  |
| 372 | Patient217B  | Patient261D  |
| 372 | Patient217E  | Patient261D  |
| 372 | Patient217F  | Patient261D  |
| 373 | Patient026A  | Patient183B  |
| 373 | Patient032A  | Patient123B  |
| 373 | Patient045D  | Patient108D  |
| 373 | Patient053A1 | Patient141G  |
| 373 | Patient053A2 | Patient150A  |
| 373 | Patient053B  | Patient150B  |
| 373 | Patient053C  | Patient150C  |
| 373 | Patient066E  | Patient123B  |
| 373 | Patient066E  | Patient123C  |
| 373 | Patient074A  | Patient081E  |
| 373 | Patient074C  | Patient081C  |
| 373 | Patient074C  | Patient081D  |
| 373 | Patient081A1 | Patient161B  |
| 373 | Patient093A  | Patient189E  |
| 373 | Patient093E  | Patient189E  |
| 373 | Patient097B  | Patient189A  |
| 373 | Patient097B  | Patient189B  |
| 373 | Patient108F  | Patient126D  |
| 373 | Patient108F  | Patient189E  |
| 373 | Patient108H  | Patient126D  |
| 373 | Patient109D  | Patient189B  |
| 373 | Patient123B  | Patient224B  |
| 373 | Patient123C  | Patient224B  |
| 373 | Patient123D  | Patient230G  |
| 373 | Patient173B  | Patient230G  |
| 373 | Patient195   | Patient258G  |
| 373 | Patient217A  | Patient261D  |
| 373 | Patient217H  | Patient261D  |



|     |              |              |
|-----|--------------|--------------|
| 373 | Patient217I  | Patient261A  |
| 374 | Patient021A2 | Patient045D  |
| 374 | Patient021A2 | Patient108A  |
| 374 | Patient026A  | Patient066D  |
| 374 | Patient053A2 | Patient150B  |
| 374 | Patient053B  | Patient150C  |
| 374 | Patient066E  | Patient258B  |
| 374 | Patient066E  | Patient258D  |
| 374 | Patient066F  | Patient123B  |
| 374 | Patient066F  | Patient123C  |
| 374 | Patient066F  | Patient258G  |
| 374 | Patient074C  | Patient081F  |
| 374 | Patient081D  | Patient224B  |
| 374 | Patient093A  | Patient189B  |
| 374 | Patient097E  | Patient189E  |
| 374 | Patient108F  | Patient189A  |
| 374 | Patient108F  | Patient189B  |
| 374 | Patient109C  | Patient126D  |
| 374 | Patient123A  | Patient141F  |
| 374 | Patient123C  | Patient141G  |
| 374 | Patient123C  | Patient230C  |
| 374 | Patient123C  | Patient261E  |
| 374 | Patient167   | Patient217J  |
| 374 | Patient195   | Patient258B  |
| 375 | Patient026B  | Patient183A  |
| 375 | Patient026F  | Patient183A  |
| 375 | Patient032A  | Patient123D  |
| 375 | Patient032A  | Patient173A  |
| 375 | Patient032B  | Patient123C  |
| 375 | Patient032C  | Patient173B  |
| 375 | Patient032D  | Patient192D  |
| 375 | Patient034B  | Patient123A  |
| 375 | Patient034D  | Patient123A  |
| 375 | Patient034E  | Patient123A  |
| 375 | Patient053A1 | Patient261E  |
| 375 | Patient053A2 | Patient150C  |
| 375 | Patient066E  | Patient258A2 |
| 375 | Patient066F  | Patient258B  |
| 375 | Patient074B  | Patient123A  |
| 375 | Patient081C  | Patient141C  |
| 375 | Patient081C  | Patient224B  |
| 375 | Patient092B  | Patient192D  |
| 375 | Patient093D  | Patient189B  |
| 375 | Patient094B  | Patient189B  |
| 375 | Patient097B  | Patient252F  |
| 375 | Patient103C  | Patient173A  |
| 375 | Patient123B  | Patient261E  |
| 375 | Patient123C  | Patient224A  |
| 375 | Patient123C  | Patient261C  |
| 375 | Patient145C  | Patient261B  |

|     |              |              |
|-----|--------------|--------------|
| 375 | Patient173A  | Patient224A  |
| 375 | Patient173A  | Patient230C  |
| 375 | Patient173A  | Patient261E  |
| 375 | Patient173B  | Patient224A  |
| 375 | Patient195   | Patient258D  |
| 376 | Patient021A1 | Patient108A  |
| 376 | Patient026A  | Patient183A  |
| 376 | Patient026B  | Patient183E  |
| 376 | Patient026D  | Patient066E  |
| 376 | Patient026D  | Patient258E  |
| 376 | Patient034A  | Patient123C  |
| 376 | Patient045B  | Patient053A2 |
| 376 | Patient045B  | Patient053C  |
| 376 | Patient045D  | Patient109A  |
| 376 | Patient053A1 | Patient081D  |
| 376 | Patient053A1 | Patient141F  |
| 376 | Patient066E  | Patient258F  |
| 376 | Patient066F  | Patient258D  |
| 376 | Patient074D  | Patient081A2 |
| 376 | Patient094B  | Patient189A  |
| 376 | Patient094B  | Patient189E  |
| 376 | Patient094D  | Patient189A  |
| 376 | Patient094D  | Patient189B  |
| 376 | Patient094D  | Patient189E  |
| 376 | Patient097B  | Patient189E  |
| 376 | Patient109D  | Patient189E  |
| 376 | Patient123A  | Patient141D  |
| 376 | Patient123B  | Patient141G  |
| 376 | Patient123B  | Patient224A  |
| 376 | Patient123B  | Patient230C  |
| 376 | Patient123B  | Patient261C  |
| 376 | Patient141G  | Patient173A  |
| 376 | Patient187   | Patient189A  |
| 376 | Patient189A  | Patient222A  |
| 376 | Patient189A  | Patient222F  |
| 376 | Patient189B  | Patient222A  |
| 376 | Patient192D  | Patient213A  |
| 376 | Patient195   | Patient258A1 |
| 376 | Patient195   | Patient258A2 |
| 377 | Patient026A  | Patient183E  |
| 377 | Patient026F  | Patient183E  |
| 377 | Patient032E  | Patient126A  |
| 377 | Patient034C  | Patient123A  |
| 377 | Patient045A  | Patient053A2 |
| 377 | Patient045A  | Patient053C  |
| 377 | Patient045B  | Patient053B  |
| 377 | Patient053A1 | Patient230C  |
| 377 | Patient066E  | Patient258A1 |
| 377 | Patient074C  | Patient081E  |
| 377 | Patient074D  | Patient081B  |

|     |              |              |
|-----|--------------|--------------|
| 377 | Patient079A1 | Patient108A  |
| 377 | Patient081D  | Patient141C  |
| 377 | Patient081E  | Patient161B  |
| 377 | Patient081F  | Patient161B  |
| 377 | Patient092D  | Patient192D  |
| 377 | Patient092E  | Patient192D  |
| 377 | Patient092H  | Patient192D  |
| 377 | Patient093D  | Patient189A  |
| 377 | Patient093D  | Patient189E  |
| 377 | Patient094E  | Patient189A  |
| 377 | Patient109D  | Patient126D  |
| 377 | Patient123B  | Patient141F  |
| 377 | Patient123C  | Patient141F  |
| 377 | Patient123D  | Patient230C  |
| 377 | Patient145C  | Patient261A  |
| 377 | Patient173A  | Patient261C  |
| 377 | Patient187   | Patient189B  |
| 377 | Patient187   | Patient189E  |
| 377 | Patient189B  | Patient196A  |
| 377 | Patient195   | Patient258F  |
| 377 | Patient217J  | Patient261A  |
| 377 | Patient217J  | Patient261B  |
| 378 | Patient021A1 | Patient045D  |
| 378 | Patient021A2 | Patient108D  |
| 378 | Patient021A2 | Patient109A  |
| 378 | Patient026B  | Patient183D  |
| 378 | Patient026E  | Patient177   |
| 378 | Patient026F  | Patient183D  |
| 378 | Patient032B  | Patient123B  |
| 378 | Patient032B  | Patient173A  |
| 378 | Patient032E  | Patient121A  |
| 378 | Patient034D  | Patient123C  |
| 378 | Patient045A  | Patient053B  |
| 378 | Patient045D  | Patient109B  |
| 378 | Patient053A1 | Patient081C  |
| 378 | Patient053A1 | Patient150A  |
| 378 | Patient053A1 | Patient261C  |
| 378 | Patient066E  | Patient123D  |
| 378 | Patient066F  | Patient258A1 |
| 378 | Patient066F  | Patient258A2 |
| 378 | Patient066F  | Patient258F  |
| 378 | Patient074A  | Patient123A  |
| 378 | Patient074B  | Patient123B  |
| 378 | Patient074B  | Patient123C  |
| 378 | Patient079A2 | Patient108A  |
| 378 | Patient081C  | Patient141B  |
| 378 | Patient094C  | Patient189A  |
| 378 | Patient094E  | Patient189B  |
| 378 | Patient103C  | Patient173B  |
| 378 | Patient121B  | Patient150A  |

|     |              |              |
|-----|--------------|--------------|
| 378 | Patient123D  | Patient224B  |
| 378 | Patient123D  | Patient261C  |
| 378 | Patient123D  | Patient261E  |
| 378 | Patient141D  | Patient173A  |
| 378 | Patient173B  | Patient230C  |
| 378 | Patient173B  | Patient261E  |
| 378 | Patient189A  | Patient196A  |
| 378 | Patient189A  | Patient196B  |
| 378 | Patient189B  | Patient196B  |
| 378 | Patient217I  | Patient261D  |
| 379 | Patient021A1 | Patient108D  |
| 379 | Patient021A1 | Patient109B  |
| 379 | Patient021A2 | Patient109B  |
| 379 | Patient026A  | Patient183D  |
| 379 | Patient026D  | Patient066F  |
| 379 | Patient026E  | Patient066D  |
| 379 | Patient032E  | Patient126C  |
| 379 | Patient034A  | Patient123B  |
| 379 | Patient034A  | Patient173A  |
| 379 | Patient034B  | Patient123C  |
| 379 | Patient034E  | Patient123C  |
| 379 | Patient045D  | Patient108F  |
| 379 | Patient045D  | Patient108G  |
| 379 | Patient045D  | Patient108H  |
| 379 | Patient045D  | Patient109E  |
| 379 | Patient053A1 | Patient150B  |
| 379 | Patient074A  | Patient123B  |
| 379 | Patient074D  | Patient081A1 |
| 379 | Patient079A1 | Patient108D  |
| 379 | Patient079A1 | Patient126D  |
| 379 | Patient079C  | Patient108A  |
| 379 | Patient079C  | Patient126D  |
| 379 | Patient092G  | Patient192D  |
| 379 | Patient103C  | Patient123A  |
| 379 | Patient108A  | Patient252B  |
| 379 | Patient121B  | Patient150B  |
| 379 | Patient121B  | Patient150C  |
| 379 | Patient121B  | Patient258B  |
| 379 | Patient123A  | Patient173A  |
| 379 | Patient123A  | Patient261G  |
| 379 | Patient123D  | Patient141G  |
| 379 | Patient141G  | Patient173B  |
| 379 | Patient189B  | Patient222F  |
| 379 | Patient189E  | Patient196B  |
| 379 | Patient189E  | Patient222F  |
| 379 | Patient195   | Patient217I  |
| 380 | Patient021A1 | Patient109A  |
| 380 | Patient026A  | Patient066E  |
| 380 | Patient026E  | Patient121A  |
| 380 | Patient032A  | Patient173B  |

|     |              |              |
|-----|--------------|--------------|
| 380 | Patient034A  | Patient123D  |
| 380 | Patient034B  | Patient173A  |
| 380 | Patient034D  | Patient123B  |
| 380 | Patient034E  | Patient173A  |
| 380 | Patient045D  | Patient109C  |
| 380 | Patient053A1 | Patient150C  |
| 380 | Patient053A2 | Patient177   |
| 380 | Patient074A  | Patient123C  |
| 380 | Patient074D  | Patient081C  |
| 380 | Patient074D  | Patient081D  |
| 380 | Patient079A2 | Patient108D  |
| 380 | Patient079B  | Patient108A  |
| 380 | Patient079B  | Patient126D  |
| 380 | Patient081B  | Patient224B  |
| 380 | Patient081D  | Patient141B  |
| 380 | Patient088   | Patient114   |
| 380 | Patient097A  | Patient108A  |
| 380 | Patient097A  | Patient108D  |
| 380 | Patient100A  | Patient189B  |
| 380 | Patient108A  | Patient252A  |
| 380 | Patient121B  | Patient258D  |
| 380 | Patient121B  | Patient258G  |
| 380 | Patient123C  | Patient141D  |
| 380 | Patient123D  | Patient224A  |
| 380 | Patient126A  | Patient230G  |
| 380 | Patient173B  | Patient261C  |
| 380 | Patient189A  | Patient222E  |
| 380 | Patient189B  | Patient222E  |
| 380 | Patient189E  | Patient196A  |
| 380 | Patient235A  | Patient251   |
| 380 | Patient235B  | Patient251   |
| 381 | Patient021A2 | Patient108B1 |
| 381 | Patient021A2 | Patient108G  |
| 381 | Patient026A  | Patient066F  |
| 381 | Patient026C  | Patient261B  |
| 381 | Patient032B  | Patient123D  |
| 381 | Patient032B  | Patient173B  |
| 381 | Patient032D  | Patient126A  |
| 381 | Patient032E  | Patient192D  |
| 381 | Patient034A  | Patient173B  |
| 381 | Patient034B  | Patient123B  |
| 381 | Patient034C  | Patient123C  |
| 381 | Patient045C  | Patient053A2 |
| 381 | Patient045C  | Patient053C  |
| 381 | Patient053C  | Patient177   |
| 381 | Patient066D  | Patient081C  |
| 381 | Patient066D  | Patient081D  |
| 381 | Patient066F  | Patient123D  |
| 381 | Patient079A1 | Patient109A  |
| 381 | Patient079A2 | Patient126D  |

|     |              |              |
|-----|--------------|--------------|
| 381 | Patient079B  | Patient108D  |
| 381 | Patient079C  | Patient108D  |
| 381 | Patient081A1 | Patient224B  |
| 381 | Patient081A2 | Patient224B  |
| 381 | Patient081C  | Patient141A  |
| 381 | Patient094C  | Patient189B  |
| 381 | Patient094C  | Patient189E  |
| 381 | Patient094E  | Patient189E  |
| 381 | Patient100A  | Patient189A  |
| 381 | Patient100A  | Patient189E  |
| 381 | Patient103D  | Patient167   |
| 381 | Patient108B2 | Patient189A  |
| 381 | Patient108B2 | Patient189B  |
| 381 | Patient121B  | Patient258A1 |
| 381 | Patient123B  | Patient141D  |
| 381 | Patient141D  | Patient173B  |
| 381 | Patient141F  | Patient173A  |
| 381 | Patient189A  | Patient252B  |
| 381 | Patient189B  | Patient252B  |
| 381 | Patient189E  | Patient222A  |
| 381 | Patient189E  | Patient222E  |
| 381 | Patient235C  | Patient251   |
| 381 | Patient235F  | Patient251   |
| 382 | Patient026C  | Patient261A  |
| 382 | Patient032C  | Patient126A  |
| 382 | Patient032C  | Patient126C  |
| 382 | Patient034D  | Patient173A  |
| 382 | Patient034E  | Patient123B  |
| 382 | Patient045C  | Patient053B  |
| 382 | Patient053B  | Patient177   |
| 382 | Patient074C  | Patient123A  |
| 382 | Patient074D  | Patient081F  |
| 382 | Patient074E  | Patient081A2 |
| 382 | Patient079A1 | Patient097A  |
| 382 | Patient079A2 | Patient109A  |
| 382 | Patient079C  | Patient097A  |
| 382 | Patient081C  | Patient230A  |
| 382 | Patient081C  | Patient230D  |
| 382 | Patient081D  | Patient230D  |
| 382 | Patient103B  | Patient173A  |
| 382 | Patient103C  | Patient123C  |
| 382 | Patient108B1 | Patient189B  |
| 382 | Patient108B2 | Patient189E  |
| 382 | Patient121B  | Patient258A2 |
| 382 | Patient121B  | Patient258F  |
| 382 | Patient123D  | Patient141F  |
| 382 | Patient126C  | Patient230G  |
| 382 | Patient145B  | Patient235A  |
| 382 | Patient189B  | Patient252A  |
| 382 | Patient195   | Patient217J  |

|     |              |              |
|-----|--------------|--------------|
| 383 | Patient021A1 | Patient108G  |
| 383 | Patient021A2 | Patient108B2 |
| 383 | Patient021A2 | Patient108H  |
| 383 | Patient026D  | Patient074B  |
| 383 | Patient026D  | Patient121B  |
| 383 | Patient026E  | Patient258E  |
| 383 | Patient032C  | Patient121A  |
| 383 | Patient034B  | Patient173B  |
| 383 | Patient034E  | Patient123D  |
| 383 | Patient034E  | Patient173B  |
| 383 | Patient074C  | Patient123B  |
| 383 | Patient074D  | Patient081E  |
| 383 | Patient074E  | Patient081B  |
| 383 | Patient079A1 | Patient108B1 |
| 383 | Patient079A1 | Patient109B  |
| 383 | Patient079A2 | Patient097A  |
| 383 | Patient079A2 | Patient108B1 |
| 383 | Patient079C  | Patient109A  |
| 383 | Patient079C  | Patient109B  |
| 383 | Patient081A1 | Patient141C  |
| 383 | Patient081A2 | Patient141C  |
| 383 | Patient081B  | Patient141C  |
| 383 | Patient081C  | Patient230E  |
| 383 | Patient081D  | Patient141A  |
| 383 | Patient081D  | Patient230A  |
| 383 | Patient081D  | Patient230E  |
| 383 | Patient081D  | Patient230F  |
| 383 | Patient097C  | Patient108A  |
| 383 | Patient097D  | Patient108A  |
| 383 | Patient103B  | Patient123A  |
| 383 | Patient103C  | Patient123B  |
| 383 | Patient108B1 | Patient189A  |
| 383 | Patient108B1 | Patient189E  |
| 383 | Patient108D  | Patient252B  |
| 383 | Patient109A  | Patient252B  |
| 383 | Patient123A  | Patient141C  |
| 383 | Patient123A  | Patient173B  |
| 383 | Patient123A  | Patient181A  |
| 383 | Patient123C  | Patient173A  |
| 383 | Patient189A  | Patient252A  |
| 383 | Patient217J  | Patient261D  |
| 384 | Patient021A1 | Patient108B1 |
| 384 | Patient021A1 | Patient108H  |
| 384 | Patient021A2 | Patient131   |
| 384 | Patient026D  | Patient103D  |
| 384 | Patient026F  | Patient103D  |
| 384 | Patient034B  | Patient123D  |
| 384 | Patient034C  | Patient123B  |
| 384 | Patient045D  | Patient109D  |
| 384 | Patient074C  | Patient123C  |

|     |              |              |
|-----|--------------|--------------|
| 384 | Patient074E  | Patient081A1 |
| 384 | Patient079A1 | Patient108G  |
| 384 | Patient079A2 | Patient109B  |
| 384 | Patient079B  | Patient108B1 |
| 384 | Patient079C  | Patient108B1 |
| 384 | Patient081E  | Patient141C  |
| 384 | Patient081F  | Patient224B  |
| 384 | Patient097A  | Patient109A  |
| 384 | Patient109A  | Patient252A  |
| 384 | Patient120A  | Patient177   |
| 384 | Patient123A  | Patient141B  |
| 384 | Patient123B  | Patient173A  |
| 384 | Patient123C  | Patient261G  |
| 384 | Patient141F  | Patient173B  |
| 384 | Patient145C  | Patient261D  |
| 384 | Patient189A  | Patient196C  |
| 384 | Patient189B  | Patient196E  |
| 384 | Patient189E  | Patient196C  |
| 384 | Patient189E  | Patient252B  |
| 385 | Patient026B  | Patient103D  |
| 385 | Patient026B  | Patient258E  |
| 385 | Patient026B  | Patient258G  |
| 385 | Patient026E  | Patient066E  |
| 385 | Patient032A  | Patient192D  |
| 385 | Patient032C  | Patient192D  |
| 385 | Patient034C  | Patient173A  |
| 385 | Patient034D  | Patient123D  |
| 385 | Patient034D  | Patient173B  |
| 385 | Patient045B  | Patient053A1 |
| 385 | Patient053A1 | Patient161B  |
| 385 | Patient074B  | Patient123D  |
| 385 | Patient074E  | Patient081D  |
| 385 | Patient079A1 | Patient097C  |
| 385 | Patient079A1 | Patient108B2 |
| 385 | Patient079A2 | Patient108B2 |
| 385 | Patient079A2 | Patient108G  |
| 385 | Patient079C  | Patient097C  |
| 385 | Patient079C  | Patient097E  |
| 385 | Patient079C  | Patient108B2 |
| 385 | Patient081A1 | Patient141B  |
| 385 | Patient081C  | Patient230F  |
| 385 | Patient081E  | Patient224B  |
| 385 | Patient081F  | Patient141C  |
| 385 | Patient103B  | Patient173B  |
| 385 | Patient108B1 | Patient252B  |
| 385 | Patient121A  | Patient258B  |
| 385 | Patient123D  | Patient141D  |
| 385 | Patient126A  | Patient141G  |
| 385 | Patient189A  | Patient196E  |
| 385 | Patient189B  | Patient196C  |



|     |              |              |
|-----|--------------|--------------|
| 385 | Patient189B  | Patient218A  |
| 385 | Patient189E  | Patient196E  |
| 385 | Patient235E  | Patient251   |
| 386 | Patient021A1 | Patient108B2 |
| 386 | Patient021A1 | Patient131   |
| 386 | Patient021A2 | Patient108F  |
| 386 | Patient026B  | Patient258B  |
| 386 | Patient026D  | Patient074A  |
| 386 | Patient026F  | Patient258E  |
| 386 | Patient026F  | Patient258G  |
| 386 | Patient045A  | Patient053A1 |
| 386 | Patient053A1 | Patient261G  |
| 386 | Patient074E  | Patient081C  |
| 386 | Patient079A2 | Patient097C  |
| 386 | Patient079B  | Patient097A  |
| 386 | Patient079B  | Patient108B2 |
| 386 | Patient079B  | Patient108G  |
| 386 | Patient079B  | Patient109A  |
| 386 | Patient079B  | Patient109B  |
| 386 | Patient079C  | Patient097D  |
| 386 | Patient079C  | Patient108G  |
| 386 | Patient079C  | Patient108H  |
| 386 | Patient081A2 | Patient141B  |
| 386 | Patient081B  | Patient141B  |
| 386 | Patient097A  | Patient109B  |
| 386 | Patient097A  | Patient131   |
| 386 | Patient097E  | Patient108A  |
| 386 | Patient103A  | Patient123A  |
| 386 | Patient108A  | Patient252F  |
| 386 | Patient108D  | Patient252A  |
| 386 | Patient121A  | Patient167   |
| 386 | Patient121A  | Patient258D  |
| 386 | Patient121A  | Patient258G  |
| 386 | Patient123B  | Patient141C  |
| 386 | Patient123B  | Patient181A  |
| 386 | Patient123B  | Patient261G  |
| 386 | Patient123C  | Patient141C  |
| 386 | Patient123C  | Patient181A  |
| 386 | Patient123D  | Patient173A  |
| 386 | Patient173A  | Patient261G  |
| 386 | Patient189A  | Patient218A  |
| 386 | Patient189B  | Patient252F  |
| 386 | Patient189E  | Patient252A  |
| 387 | Patient021A2 | Patient109C  |
| 387 | Patient021A2 | Patient109E  |
| 387 | Patient026B  | Patient258D  |
| 387 | Patient026F  | Patient258B  |
| 387 | Patient032D  | Patient126C  |
| 387 | Patient034C  | Patient123D  |
| 387 | Patient079A2 | Patient097D  |

|     |              |              |
|-----|--------------|--------------|
| 387 | Patient097A  | Patient108B1 |
| 387 | Patient097A  | Patient108B2 |
| 387 | Patient097A  | Patient108G  |
| 387 | Patient097A  | Patient109E  |
| 387 | Patient097B  | Patient108A  |
| 387 | Patient097B  | Patient108D  |
| 387 | Patient097C  | Patient108D  |
| 387 | Patient097C  | Patient109A  |
| 387 | Patient097D  | Patient108D  |
| 387 | Patient103C  | Patient123D  |
| 387 | Patient103E  | Patient167   |
| 387 | Patient108G  | Patient252B  |
| 387 | Patient108H  | Patient252B  |
| 387 | Patient121A  | Patient230G  |
| 387 | Patient121A  | Patient258A1 |
| 387 | Patient123C  | Patient141B  |
| 387 | Patient123C  | Patient173B  |
| 387 | Patient123D  | Patient261G  |
| 387 | Patient126A  | Patient230C  |
| 387 | Patient126A  | Patient261E  |
| 387 | Patient189B  | Patient218B  |
| 387 | Patient192D  | Patient230G  |
| 388 | Patient026A  | Patient103D  |
| 388 | Patient026C  | Patient261D  |
| 388 | Patient026D  | Patient103E  |
| 388 | Patient026E  | Patient066F  |
| 388 | Patient026F  | Patient258D  |
| 388 | Patient034C  | Patient173B  |
| 388 | Patient045D  | Patient108B2 |
| 388 | Patient066E  | Patient081C  |
| 388 | Patient066E  | Patient081D  |
| 388 | Patient066F  | Patient081D  |
| 388 | Patient074A  | Patient123D  |
| 388 | Patient074D  | Patient123A  |
| 388 | Patient074E  | Patient081F  |
| 388 | Patient079A1 | Patient097D  |
| 388 | Patient079A1 | Patient097E  |
| 388 | Patient079A1 | Patient108H  |
| 388 | Patient079A1 | Patient109E  |
| 388 | Patient079A2 | Patient108H  |
| 388 | Patient079C  | Patient109C  |
| 388 | Patient079C  | Patient109E  |
| 388 | Patient081A1 | Patient126A  |
| 388 | Patient081A1 | Patient141A  |
| 388 | Patient081B  | Patient126A  |
| 388 | Patient081E  | Patient141B  |
| 388 | Patient097A  | Patient108H  |
| 388 | Patient103B  | Patient123C  |
| 388 | Patient104B  | Patient189B  |
| 388 | Patient108B1 | Patient252A  |

|     |              |              |
|-----|--------------|--------------|
| 388 | Patient108H  | Patient252A  |
| 388 | Patient109B  | Patient252A  |
| 388 | Patient109B  | Patient252B  |
| 388 | Patient109E  | Patient252B  |
| 388 | Patient121A  | Patient258A2 |
| 388 | Patient121A  | Patient258F  |
| 388 | Patient123B  | Patient141B  |
| 388 | Patient123B  | Patient173B  |
| 388 | Patient126A  | Patient261C  |
| 388 | Patient145A  | Patient261B  |
| 388 | Patient189A  | Patient218B  |
| 388 | Patient189B  | Patient201B  |
| 389 | Patient021A1 | Patient109C  |
| 389 | Patient021A2 | Patient109D  |
| 389 | Patient026B  | Patient258A2 |
| 389 | Patient026B  | Patient258F  |
| 389 | Patient026C  | Patient258E  |
| 389 | Patient026D  | Patient074C  |
| 389 | Patient032B  | Patient192D  |
| 389 | Patient032E  | Patient121B  |
| 389 | Patient034A  | Patient192D  |
| 389 | Patient074E  | Patient081E  |
| 389 | Patient079A1 | Patient097B  |
| 389 | Patient079A2 | Patient097B  |
| 389 | Patient079A2 | Patient097E  |
| 389 | Patient079A2 | Patient109E  |
| 389 | Patient081A2 | Patient126A  |
| 389 | Patient081A2 | Patient141A  |
| 389 | Patient081B  | Patient141A  |
| 389 | Patient081F  | Patient141B  |
| 389 | Patient097A  | Patient149A  |
| 389 | Patient097D  | Patient109A  |
| 389 | Patient097E  | Patient108D  |
| 389 | Patient097E  | Patient131   |
| 389 | Patient099A  | Patient189A  |
| 389 | Patient103A  | Patient123C  |
| 389 | Patient103A  | Patient173A  |
| 389 | Patient104B  | Patient189A  |
| 389 | Patient108B2 | Patient252B  |
| 389 | Patient108G  | Patient252A  |
| 389 | Patient123A  | Patient141A  |
| 389 | Patient126C  | Patient141G  |
| 389 | Patient126E  | Patient189B  |
| 389 | Patient141D  | Patient192D  |
| 389 | Patient145C  | Patient192D  |
| 389 | Patient173B  | Patient261G  |
| 389 | Patient189A  | Patient252F  |
| 389 | Patient189E  | Patient218A  |
| 389 | Patient189E  | Patient218B  |
| 390 | Patient021A1 | Patient108F  |

|     |              |              |
|-----|--------------|--------------|
| 390 | Patient026B  | Patient258A1 |
| 390 | Patient026F  | Patient103E  |
| 390 | Patient026F  | Patient258A1 |
| 390 | Patient026F  | Patient258A2 |
| 390 | Patient026F  | Patient258F  |
| 390 | Patient032A  | Patient126A  |
| 390 | Patient045C  | Patient053A1 |
| 390 | Patient045D  | Patient108B1 |
| 390 | Patient066D  | Patient081A1 |
| 390 | Patient066F  | Patient081C  |
| 390 | Patient079A1 | Patient109C  |
| 390 | Patient079A1 | Patient109D  |
| 390 | Patient079B  | Patient097C  |
| 390 | Patient079B  | Patient108H  |
| 390 | Patient081C  | Patient230B  |
| 390 | Patient081E  | Patient141A  |
| 390 | Patient097A  | Patient108F  |
| 390 | Patient097A  | Patient109C  |
| 390 | Patient097C  | Patient109B  |
| 390 | Patient097C  | Patient131   |
| 390 | Patient097D  | Patient131   |
| 390 | Patient097E  | Patient109B  |
| 390 | Patient103A  | Patient123B  |
| 390 | Patient103B  | Patient123B  |
| 390 | Patient103D  | Patient161B  |
| 390 | Patient109A  | Patient252F  |
| 390 | Patient109C  | Patient252B  |
| 390 | Patient121A  | Patient141G  |
| 390 | Patient121A  | Patient261E  |
| 390 | Patient123D  | Patient141C  |
| 390 | Patient123D  | Patient173B  |
| 390 | Patient126A  | Patient141F  |
| 390 | Patient126C  | Patient230C  |
| 390 | Patient126C  | Patient261C  |
| 390 | Patient126C  | Patient261E  |
| 390 | Patient126E  | Patient189A  |
| 390 | Patient192D  | Patient261E  |
| 391 | Patient021A1 | Patient109D  |
| 391 | Patient021A1 | Patient109E  |
| 391 | Patient026B  | Patient103E  |
| 391 | Patient026D  | Patient053A2 |
| 391 | Patient026E  | Patient121B  |
| 391 | Patient034A  | Patient126A  |
| 391 | Patient066D  | Patient081A2 |
| 391 | Patient066D  | Patient081B  |
| 391 | Patient074D  | Patient123B  |
| 391 | Patient074D  | Patient123C  |
| 391 | Patient079A1 | Patient108F  |
| 391 | Patient079A2 | Patient109C  |
| 391 | Patient079A2 | Patient109D  |

|     |              |              |
|-----|--------------|--------------|
| 391 | Patient079B  | Patient097D  |
| 391 | Patient079B  | Patient109E  |
| 391 | Patient079C  | Patient097B  |
| 391 | Patient079C  | Patient108F  |
| 391 | Patient079C  | Patient109D  |
| 391 | Patient081A2 | Patient126C  |
| 391 | Patient081B  | Patient126C  |
| 391 | Patient081D  | Patient230B  |
| 391 | Patient097C  | Patient108B1 |
| 391 | Patient097C  | Patient108G  |
| 391 | Patient097D  | Patient108G  |
| 391 | Patient097D  | Patient109B  |
| 391 | Patient097E  | Patient109A  |
| 391 | Patient099A  | Patient189E  |
| 391 | Patient099B  | Patient189A  |
| 391 | Patient099B  | Patient189B  |
| 391 | Patient108B2 | Patient252A  |
| 391 | Patient108D  | Patient252F  |
| 391 | Patient108F  | Patient252B  |
| 391 | Patient109C  | Patient252A  |
| 391 | Patient123D  | Patient141B  |
| 391 | Patient145A  | Patient261A  |
| 391 | Patient181A  | Patient258B  |
| 391 | Patient189A  | Patient201B  |
| 391 | Patient189B  | Patient201E  |
| 392 | Patient026A  | Patient103E  |
| 392 | Patient026C  | Patient258B  |
| 392 | Patient026D  | Patient053C  |
| 392 | Patient026E  | Patient074B  |
| 392 | Patient032B  | Patient126A  |
| 392 | Patient074C  | Patient123D  |
| 392 | Patient079A2 | Patient108F  |
| 392 | Patient079B  | Patient109D  |
| 392 | Patient081A1 | Patient230A  |
| 392 | Patient081F  | Patient141A  |
| 392 | Patient097B  | Patient108G  |
| 392 | Patient097B  | Patient109A  |
| 392 | Patient097C  | Patient108H  |
| 392 | Patient097C  | Patient109E  |
| 392 | Patient097D  | Patient108B1 |
| 392 | Patient097D  | Patient108H  |
| 392 | Patient097E  | Patient108H  |
| 392 | Patient099A  | Patient189B  |
| 392 | Patient103A  | Patient173B  |
| 392 | Patient103E  | Patient161B  |
| 392 | Patient104A  | Patient189B  |
| 392 | Patient108B1 | Patient252F  |
| 392 | Patient109B  | Patient252F  |
| 392 | Patient123A  | Patient181B  |
| 392 | Patient123C  | Patient141A  |

|     |              |              |
|-----|--------------|--------------|
| 392 | Patient123D  | Patient181A  |
| 392 | Patient181A  | Patient258G  |
| 392 | Patient189A  | Patient222D  |
| 392 | Patient189E  | Patient252F  |
| 392 | Patient192D  | Patient261C  |
| 393 | Patient026C  | Patient258G  |
| 393 | Patient026D  | Patient053B  |
| 393 | Patient026E  | Patient103D  |
| 393 | Patient034D  | Patient192D  |
| 393 | Patient034E  | Patient192D  |
| 393 | Patient053A1 | Patient177   |
| 393 | Patient074E  | Patient123A  |
| 393 | Patient079B  | Patient097B  |
| 393 | Patient079B  | Patient108F  |
| 393 | Patient079B  | Patient109C  |
| 393 | Patient081A1 | Patient126C  |
| 393 | Patient081A2 | Patient230A  |
| 393 | Patient081B  | Patient230A  |
| 393 | Patient081E  | Patient126A  |
| 393 | Patient097A  | Patient109D  |
| 393 | Patient097B  | Patient109B  |
| 393 | Patient097C  | Patient108B2 |
| 393 | Patient097C  | Patient149A  |
| 393 | Patient097E  | Patient108B1 |
| 393 | Patient097E  | Patient108B2 |
| 393 | Patient097E  | Patient108G  |
| 393 | Patient103D  | Patient251   |
| 393 | Patient104A  | Patient189A  |
| 393 | Patient108H  | Patient252F  |
| 393 | Patient109E  | Patient252A  |
| 393 | Patient121A  | Patient230C  |
| 393 | Patient121A  | Patient261C  |
| 393 | Patient123A  | Patient230A  |
| 393 | Patient123B  | Patient141A  |
| 393 | Patient126A  | Patient141D  |
| 393 | Patient126C  | Patient141F  |
| 393 | Patient126E  | Patient189E  |
| 393 | Patient181A  | Patient258D  |
| 393 | Patient181A  | Patient258E  |
| 393 | Patient189A  | Patient201A  |
| 393 | Patient189B  | Patient201A  |
| 393 | Patient189E  | Patient201A  |
| 393 | Patient189E  | Patient201B  |
| 393 | Patient192D  | Patient230C  |
| 394 | Patient026C  | Patient258D  |
| 394 | Patient026D  | Patient053A1 |
| 394 | Patient032A  | Patient126C  |
| 394 | Patient032C  | Patient121B  |
| 394 | Patient034B  | Patient192D  |
| 394 | Patient066D  | Patient081E  |

|     |              |              |
|-----|--------------|--------------|
| 394 | Patient079B  | Patient097E  |
| 394 | Patient079C  | Patient252B  |
| 394 | Patient081A2 | Patient230E  |
| 394 | Patient081B  | Patient230E  |
| 394 | Patient081B  | Patient230F  |
| 394 | Patient081F  | Patient126A  |
| 394 | Patient097B  | Patient108B1 |
| 394 | Patient097B  | Patient131   |
| 394 | Patient097C  | Patient109C  |
| 394 | Patient097D  | Patient109C  |
| 394 | Patient097D  | Patient109E  |
| 394 | Patient099E  | Patient189A  |
| 394 | Patient099E  | Patient189E  |
| 394 | Patient103B  | Patient123D  |
| 394 | Patient104B  | Patient189E  |
| 394 | Patient108A  | Patient149A  |
| 394 | Patient109C  | Patient252F  |
| 394 | Patient126D  | Patient189E  |
| 394 | Patient181A  | Patient258A1 |
| 394 | Patient181A  | Patient258A2 |
| 394 | Patient181A  | Patient258F  |
| 394 | Patient189A  | Patient201E  |
| 394 | Patient189B  | Patient222D  |
| 394 | Patient189E  | Patient201E  |
| 394 | Patient189E  | Patient222D  |
| 395 | Patient026C  | Patient258A1 |
| 395 | Patient026C  | Patient258A2 |
| 395 | Patient026C  | Patient258F  |
| 395 | Patient026E  | Patient074A  |
| 395 | Patient034C  | Patient192D  |
| 395 | Patient034E  | Patient126A  |
| 395 | Patient045A  | Patient167   |
| 395 | Patient053A1 | Patient183C  |
| 395 | Patient066D  | Patient081F  |
| 395 | Patient079A1 | Patient252B  |
| 395 | Patient081A1 | Patient230E  |
| 395 | Patient081A2 | Patient230F  |
| 395 | Patient081F  | Patient126C  |
| 395 | Patient097C  | Patient108F  |
| 395 | Patient097D  | Patient108B2 |
| 395 | Patient097E  | Patient109C  |
| 395 | Patient097E  | Patient109E  |
| 395 | Patient099B  | Patient189E  |
| 395 | Patient099E  | Patient189B  |
| 395 | Patient103D  | Patient258E  |
| 395 | Patient108B2 | Patient252F  |
| 395 | Patient108G  | Patient252F  |
| 395 | Patient109D  | Patient252A  |
| 395 | Patient109D  | Patient252B  |
| 395 | Patient109E  | Patient252F  |

|     |              |              |
|-----|--------------|--------------|
| 395 | Patient121A  | Patient141F  |
| 395 | Patient123B  | Patient181B  |
| 395 | Patient123C  | Patient181B  |
| 395 | Patient126D  | Patient189A  |
| 395 | Patient126D  | Patient189B  |
| 396 | Patient026D  | Patient074D  |
| 396 | Patient026D  | Patient195   |
| 396 | Patient032B  | Patient126C  |
| 396 | Patient034B  | Patient126A  |
| 396 | Patient045B  | Patient167   |
| 396 | Patient045C  | Patient167   |
| 396 | Patient079A2 | Patient252B  |
| 396 | Patient081A1 | Patient230F  |
| 396 | Patient081D  | Patient195   |
| 396 | Patient081E  | Patient230E  |
| 396 | Patient081F  | Patient230E  |
| 396 | Patient097C  | Patient109D  |
| 396 | Patient097D  | Patient108F  |
| 396 | Patient097D  | Patient149A  |
| 396 | Patient097E  | Patient149A  |
| 396 | Patient099C  | Patient189B  |
| 396 | Patient099C  | Patient189E  |
| 396 | Patient099D  | Patient189B  |
| 396 | Patient103A  | Patient123D  |
| 396 | Patient104A  | Patient189E  |
| 396 | Patient108F  | Patient252A  |
| 396 | Patient123A  | Patient230F  |
| 396 | Patient123D  | Patient141A  |
| 396 | Patient126A  | Patient261G  |
| 396 | Patient195   | Patient258E  |
| 397 | Patient026E  | Patient103E  |
| 397 | Patient032E  | Patient235A  |
| 397 | Patient034A  | Patient126C  |
| 397 | Patient034D  | Patient126A  |
| 397 | Patient053A1 | Patient183B  |
| 397 | Patient053A1 | Patient258B  |
| 397 | Patient074E  | Patient123B  |
| 397 | Patient074E  | Patient123C  |
| 397 | Patient079A1 | Patient252A  |
| 397 | Patient079C  | Patient252A  |
| 397 | Patient081A1 | Patient230B  |
| 397 | Patient081A2 | Patient230B  |
| 397 | Patient081B  | Patient230B  |
| 397 | Patient081C  | Patient195   |
| 397 | Patient081E  | Patient230A  |
| 397 | Patient081F  | Patient230F  |
| 397 | Patient097B  | Patient108B2 |
| 397 | Patient097B  | Patient108H  |
| 397 | Patient097E  | Patient109D  |
| 397 | Patient108D  | Patient149A  |



|     |              |              |
|-----|--------------|--------------|
| 397 | Patient121B  | Patient167   |
| 397 | Patient123A  | Patient230B  |
| 397 | Patient123A  | Patient230E  |
| 397 | Patient123C  | Patient230A  |
| 397 | Patient126C  | Patient141D  |
| 398 | Patient026D  | Patient235F  |
| 398 | Patient026E  | Patient074C  |
| 398 | Patient053A1 | Patient258G  |
| 398 | Patient066E  | Patient081A1 |
| 398 | Patient074D  | Patient123D  |
| 398 | Patient079A2 | Patient252A  |
| 398 | Patient079B  | Patient252B  |
| 398 | Patient081E  | Patient126C  |
| 398 | Patient081E  | Patient230F  |
| 398 | Patient081F  | Patient230A  |
| 398 | Patient097B  | Patient109C  |
| 398 | Patient097B  | Patient109E  |
| 398 | Patient097D  | Patient109D  |
| 398 | Patient097E  | Patient108F  |
| 398 | Patient099C  | Patient189A  |
| 398 | Patient109A  | Patient149A  |
| 398 | Patient121B  | Patient230G  |
| 398 | Patient123A  | Patient192D  |
| 398 | Patient123B  | Patient230A  |
| 398 | Patient141F  | Patient192D  |
| 398 | Patient145A  | Patient261D  |
| 399 | Patient026E  | Patient053A1 |
| 399 | Patient026E  | Patient053A2 |
| 399 | Patient034C  | Patient126A  |
| 399 | Patient034D  | Patient126C  |
| 399 | Patient066E  | Patient081A2 |
| 399 | Patient066E  | Patient081B  |
| 399 | Patient066F  | Patient081A2 |
| 399 | Patient066F  | Patient081B  |
| 399 | Patient079C  | Patient252F  |
| 399 | Patient099D  | Patient189A  |
| 399 | Patient103D  | Patient195   |
| 399 | Patient103D  | Patient258G  |
| 399 | Patient103E  | Patient251   |
| 399 | Patient103E  | Patient258E  |
| 399 | Patient108F  | Patient252F  |
| 399 | Patient126C  | Patient261G  |
| 399 | Patient171   | Patient193   |
| 400 | Patient026C  | Patient177   |
| 400 | Patient026E  | Patient053C  |
| 400 | Patient034E  | Patient126C  |
| 400 | Patient053A1 | Patient258A1 |
| 400 | Patient053A1 | Patient258A2 |
| 400 | Patient053A1 | Patient258D  |
| 400 | Patient066F  | Patient081A1 |

|     |              |              |
|-----|--------------|--------------|
| 400 | Patient079B  | Patient252A  |
| 400 | Patient097B  | Patient108F  |
| 400 | Patient097B  | Patient109D  |
| 400 | Patient103D  | Patient258B  |
| 400 | Patient123D  | Patient230A  |
| 400 | Patient189B  | Patient196D  |
| 401 | Patient026D  | Patient074E  |
| 401 | Patient026E  | Patient053B  |
| 401 | Patient034B  | Patient126C  |
| 401 | Patient053A1 | Patient183A  |
| 401 | Patient053A1 | Patient230D  |
| 401 | Patient053A1 | Patient258F  |
| 401 | Patient081E  | Patient230B  |
| 401 | Patient097B  | Patient149A  |
| 401 | Patient099D  | Patient189E  |
| 401 | Patient103D  | Patient258D  |
| 401 | Patient108B1 | Patient149A  |
| 401 | Patient121B  | Patient141G  |
| 401 | Patient121B  | Patient261E  |
| 401 | Patient123C  | Patient230B  |
| 401 | Patient123C  | Patient230F  |
| 401 | Patient123D  | Patient181B  |
| 401 | Patient141G  | Patient192D  |
| 401 | Patient183B  | Patient192D  |
| 401 | Patient183C  | Patient192D  |
| 401 | Patient189E  | Patient196D  |
| 401 | Patient192D  | Patient261G  |
| 402 | Patient026D  | Patient235E  |
| 402 | Patient053A1 | Patient183D  |
| 402 | Patient053A1 | Patient183E  |
| 402 | Patient053A2 | Patient213A  |
| 402 | Patient053C  | Patient213A  |
| 402 | Patient066E  | Patient081E  |
| 402 | Patient066E  | Patient081F  |
| 402 | Patient066F  | Patient081F  |
| 402 | Patient079A2 | Patient252F  |
| 402 | Patient081A1 | Patient230D  |
| 402 | Patient081F  | Patient230B  |
| 402 | Patient103C  | Patient126A  |
| 402 | Patient103D  | Patient258A1 |
| 402 | Patient103D  | Patient258A2 |
| 402 | Patient108G  | Patient149A  |
| 402 | Patient108H  | Patient149A  |
| 402 | Patient109B  | Patient149A  |
| 402 | Patient109D  | Patient252F  |
| 402 | Patient123B  | Patient230B  |
| 402 | Patient123C  | Patient230E  |
| 402 | Patient145A  | Patient192D  |
| 402 | Patient181B  | Patient258B  |
| 402 | Patient189A  | Patient196D  |

|     |              |             |
|-----|--------------|-------------|
| 403 | Patient026B  | Patient074A |
| 403 | Patient026F  | Patient074B |
| 403 | Patient034C  | Patient126C |
| 403 | Patient053B  | Patient213A |
| 403 | Patient079A1 | Patient252F |
| 403 | Patient081A2 | Patient230D |
| 403 | Patient081B  | Patient230D |
| 403 | Patient103D  | Patient258F |
| 403 | Patient108B2 | Patient149A |
| 403 | Patient123B  | Patient192D |
| 403 | Patient123B  | Patient230E |
| 403 | Patient123B  | Patient230F |
| 403 | Patient123C  | Patient192D |
| 403 | Patient173A  | Patient183C |
| 403 | Patient177   | Patient258B |
| 403 | Patient177   | Patient258G |
| 403 | Patient181B  | Patient258G |
| 404 | Patient026A  | Patient103C |
| 404 | Patient026A  | Patient258B |
| 404 | Patient026A  | Patient258E |
| 404 | Patient026B  | Patient074B |
| 404 | Patient026F  | Patient074A |
| 404 | Patient066F  | Patient081E |
| 404 | Patient074E  | Patient123D |
| 404 | Patient081C  | Patient126A |
| 404 | Patient103C  | Patient126C |
| 404 | Patient103E  | Patient258B |
| 404 | Patient109C  | Patient149A |
| 404 | Patient109E  | Patient149A |
| 404 | Patient121B  | Patient230C |
| 404 | Patient121B  | Patient261C |
| 404 | Patient161B  | Patient173A |
| 404 | Patient167   | Patient177  |
| 404 | Patient177   | Patient217C |
| 404 | Patient177   | Patient258D |
| 404 | Patient181B  | Patient258D |
| 404 | Patient181B  | Patient258E |
| 404 | Patient230G  | Patient235A |
| 405 | Patient026A  | Patient258G |
| 405 | Patient026E  | Patient074D |
| 405 | Patient026E  | Patient195  |
| 405 | Patient032C  | Patient235A |
| 405 | Patient079B  | Patient252F |
| 405 | Patient081E  | Patient230D |
| 405 | Patient103A  | Patient126A |
| 405 | Patient103A  | Patient126C |
| 405 | Patient103E  | Patient195  |
| 405 | Patient103E  | Patient258G |
| 405 | Patient123D  | Patient230B |
| 405 | Patient123D  | Patient230E |

|     |             |              |
|-----|-------------|--------------|
| 405 | Patient177  | Patient217D  |
| 405 | Patient177  | Patient258A1 |
| 405 | Patient177  | Patient258A2 |
| 405 | Patient177  | Patient258F  |
| 405 | Patient181B | Patient258A1 |
| 405 | Patient181B | Patient258A2 |
| 405 | Patient181B | Patient258F  |
| 405 | Patient183A | Patient192D  |
| 406 | Patient026A | Patient258D  |
| 406 | Patient026E | Patient235F  |
| 406 | Patient081D | Patient126A  |
| 406 | Patient081D | Patient126C  |
| 406 | Patient103A | Patient192D  |
| 406 | Patient103E | Patient258A1 |
| 406 | Patient103E | Patient258A2 |
| 406 | Patient103E | Patient258D  |
| 406 | Patient108F | Patient149A  |
| 406 | Patient109D | Patient149A  |
| 406 | Patient121B | Patient141F  |
| 406 | Patient123D | Patient230F  |
| 406 | Patient149A | Patient252B  |
| 406 | Patient173A | Patient183B  |
| 406 | Patient177  | Patient217B  |
| 406 | Patient183D | Patient192D  |
| 406 | Patient183E | Patient192D  |
| 407 | Patient026A | Patient258A1 |
| 407 | Patient026A | Patient258A2 |
| 407 | Patient026A | Patient258F  |
| 407 | Patient026B | Patient074C  |
| 407 | Patient026F | Patient074C  |
| 407 | Patient081C | Patient126C  |
| 407 | Patient081F | Patient230D  |
| 407 | Patient103E | Patient258F  |
| 407 | Patient126A | Patient173A  |
| 407 | Patient161B | Patient173B  |
| 407 | Patient167  | Patient213A  |
| 407 | Patient173B | Patient183C  |
| 407 | Patient177  | Patient217E  |
| 407 | Patient177  | Patient217H  |
| 407 | Patient235A | Patient261C  |
| 408 | Patient126C | Patient173A  |
| 408 | Patient149A | Patient252A  |
| 408 | Patient173A | Patient183A  |
| 408 | Patient173A | Patient183E  |
| 408 | Patient177  | Patient217A  |
| 408 | Patient177  | Patient217F  |
| 408 | Patient189B | Patient246A  |
| 408 | Patient230C | Patient235A  |
| 409 | Patient026A | Patient103B  |
| 409 | Patient081C | Patient258B  |

|     |              |              |
|-----|--------------|--------------|
| 409 | Patient081C  | Patient258G  |
| 409 | Patient103B  | Patient126A  |
| 409 | Patient123D  | Patient192D  |
| 409 | Patient126A  | Patient173B  |
| 410 | Patient026E  | Patient074E  |
| 410 | Patient026E  | Patient235E  |
| 410 | Patient081B  | Patient258E  |
| 410 | Patient081D  | Patient258B  |
| 410 | Patient081D  | Patient258G  |
| 410 | Patient120A  | Patient145B  |
| 410 | Patient121A  | Patient261G  |
| 410 | Patient145B  | Patient150A  |
| 410 | Patient145B  | Patient150B  |
| 410 | Patient145B  | Patient150C  |
| 410 | Patient173B  | Patient183B  |
| 410 | Patient189A  | Patient246A  |
| 410 | Patient235A  | Patient261E  |
| 411 | Patient081C  | Patient258D  |
| 411 | Patient123A  | Patient230D  |
| 411 | Patient141G  | Patient235A  |
| 411 | Patient173B  | Patient183E  |
| 412 | Patient081A1 | Patient258E  |
| 412 | Patient081C  | Patient258A2 |
| 412 | Patient081C  | Patient258F  |
| 412 | Patient081D  | Patient258D  |
| 412 | Patient081F  | Patient258E  |
| 412 | Patient103B  | Patient126C  |
| 412 | Patient126C  | Patient173B  |
| 412 | Patient173A  | Patient183D  |
| 412 | Patient173B  | Patient183A  |
| 412 | Patient177   | Patient217I  |
| 413 | Patient081A2 | Patient258E  |
| 413 | Patient081C  | Patient258A1 |
| 413 | Patient081D  | Patient258A1 |
| 413 | Patient081D  | Patient258A2 |
| 413 | Patient081D  | Patient258F  |
| 413 | Patient123A  | Patient167   |
| 413 | Patient149A  | Patient252F  |
| 413 | Patient150A  | Patient183C  |
| 413 | Patient150B  | Patient183C  |
| 413 | Patient150C  | Patient183C  |
| 414 | Patient053A1 | Patient213A  |
| 414 | Patient081E  | Patient258E  |
| 414 | Patient126A  | Patient224A  |
| 414 | Patient126C  | Patient224A  |
| 414 | Patient177   | Patient258E  |
| 414 | Patient189A  | Patient232B  |
| 414 | Patient189B  | Patient232B  |
| 414 | Patient189E  | Patient246A  |
| 415 | Patient026D  | Patient192A  |

|     |             |             |
|-----|-------------|-------------|
| 415 | Patient141F | Patient235A |
| 415 | Patient150A | Patient183B |
| 415 | Patient189A | Patient232A |
| 415 | Patient189A | Patient232D |
| 415 | Patient189B | Patient246C |
| 415 | Patient189E | Patient232B |
| 416 | Patient026B | Patient074D |
| 416 | Patient026D | Patient092C |
| 416 | Patient026D | Patient192C |
| 416 | Patient026F | Patient074D |
| 416 | Patient066D | Patient161B |
| 416 | Patient103D | Patient261B |
| 416 | Patient114  | Patient171  |
| 416 | Patient123B | Patient167  |
| 416 | Patient123C | Patient167  |
| 416 | Patient123C | Patient230D |
| 416 | Patient126A | Patient258E |
| 416 | Patient150B | Patient183B |
| 416 | Patient150C | Patient183B |
| 416 | Patient189A | Patient232C |
| 416 | Patient189A | Patient232E |
| 416 | Patient189B | Patient232A |
| 416 | Patient189B | Patient232C |
| 416 | Patient189B | Patient232D |
| 416 | Patient189B | Patient232E |
| 416 | Patient189E | Patient232A |
| 417 | Patient026D | Patient103C |
| 417 | Patient141B | Patient161B |
| 417 | Patient141C | Patient161B |
| 417 | Patient173B | Patient183D |
| 417 | Patient235A | Patient261G |
| 418 | Patient103D | Patient261A |
| 418 | Patient120D | Patient213A |
| 418 | Patient123B | Patient230D |
| 418 | Patient123D | Patient230D |
| 418 | Patient126A | Patient183C |
| 418 | Patient131  | Patient189B |
| 418 | Patient150A | Patient183A |
| 418 | Patient161B | Patient230D |
| 418 | Patient189A | Patient246C |
| 418 | Patient189E | Patient232D |
| 418 | Patient189E | Patient246C |
| 419 | Patient026B | Patient103C |
| 419 | Patient026F | Patient103C |
| 419 | Patient045D | Patient079C |
| 419 | Patient126A | Patient183B |
| 419 | Patient131  | Patient189A |
| 419 | Patient150B | Patient183A |
| 419 | Patient150C | Patient183A |
| 419 | Patient177  | Patient217J |

|     |              |              |
|-----|--------------|--------------|
| 420 | Patient045D  | Patient079A1 |
| 420 | Patient058   | Patient100B  |
| 420 | Patient066E  | Patient161B  |
| 420 | Patient081A1 | Patient261B  |
| 420 | Patient103E  | Patient261B  |
| 420 | Patient126C  | Patient183C  |
| 420 | Patient131   | Patient189E  |
| 420 | Patient189E  | Patient232C  |
| 420 | Patient189E  | Patient232E  |
| 421 | Patient026A  | Patient074B  |
| 421 | Patient045D  | Patient079A2 |
| 421 | Patient066F  | Patient161B  |
| 421 | Patient081B  | Patient261B  |
| 421 | Patient103C  | Patient258E  |
| 421 | Patient108B1 | Patient131   |
| 421 | Patient120B  | Patient213A  |
| 421 | Patient120C  | Patient213A  |
| 421 | Patient121B  | Patient261G  |
| 421 | Patient126C  | Patient258E  |
| 421 | Patient181A  | Patient195   |
| 422 | Patient026D  | Patient092D  |
| 422 | Patient026D  | Patient103B  |
| 422 | Patient026F  | Patient074E  |
| 422 | Patient032E  | Patient120A  |
| 422 | Patient053A2 | Patient258B  |
| 422 | Patient053C  | Patient258B  |
| 422 | Patient081A1 | Patient183B  |
| 422 | Patient081A1 | Patient183C  |
| 422 | Patient081A2 | Patient261B  |
| 422 | Patient103D  | Patient261D  |
| 422 | Patient120D  | Patient150B  |
| 422 | Patient126C  | Patient183B  |
| 422 | Patient141A  | Patient161B  |
| 422 | Patient150A  | Patient183D  |
| 422 | Patient150A  | Patient183E  |
| 422 | Patient150C  | Patient183D  |
| 422 | Patient150C  | Patient183E  |
| 423 | Patient026B  | Patient074E  |
| 423 | Patient026E  | Patient192A  |
| 423 | Patient053A2 | Patient258G  |
| 423 | Patient053C  | Patient258G  |
| 423 | Patient081A1 | Patient261A  |
| 423 | Patient081A2 | Patient195   |
| 423 | Patient081B  | Patient183B  |
| 423 | Patient081B  | Patient183C  |
| 423 | Patient081B  | Patient261A  |
| 423 | Patient103C  | Patient258G  |
| 423 | Patient120B  | Patient258B  |
| 423 | Patient120C  | Patient258B  |
| 423 | Patient120D  | Patient150A  |

|     |              |              |
|-----|--------------|--------------|
| 423 | Patient120D  | Patient150C  |
| 423 | Patient123D  | Patient167   |
| 423 | Patient150B  | Patient183D  |
| 423 | Patient150B  | Patient183E  |
| 423 | Patient161B  | Patient230F  |
| 424 | Patient026A  | Patient074A  |
| 424 | Patient026D  | Patient092A  |
| 424 | Patient026D  | Patient192B  |
| 424 | Patient026E  | Patient092C  |
| 424 | Patient026E  | Patient192C  |
| 424 | Patient045D  | Patient126D  |
| 424 | Patient053A2 | Patient258D  |
| 424 | Patient053B  | Patient258B  |
| 424 | Patient053C  | Patient258D  |
| 424 | Patient081A2 | Patient183B  |
| 424 | Patient081A2 | Patient183C  |
| 424 | Patient081A2 | Patient261A  |
| 424 | Patient081C  | Patient183C  |
| 424 | Patient081D  | Patient183C  |
| 424 | Patient081F  | Patient261A  |
| 424 | Patient103C  | Patient258B  |
| 424 | Patient103E  | Patient261A  |
| 424 | Patient120B  | Patient258G  |
| 424 | Patient120D  | Patient258G  |
| 424 | Patient126A  | Patient183A  |
| 424 | Patient161B  | Patient230E  |
| 424 | Patient167   | Patient173A  |
| 424 | Patient173A  | Patient217C  |
| 424 | Patient189A  | Patient246B  |
| 424 | Patient189B  | Patient246B  |
| 424 | Patient235F  | Patient258B  |
| 425 | Patient026C  | Patient081B  |
| 425 | Patient026D  | Patient092B  |
| 425 | Patient026D  | Patient092E  |
| 425 | Patient032C  | Patient120A  |
| 425 | Patient053A2 | Patient258A1 |
| 425 | Patient053A2 | Patient258A2 |
| 425 | Patient053A2 | Patient258F  |
| 425 | Patient053B  | Patient258G  |
| 425 | Patient053C  | Patient258A1 |
| 425 | Patient053C  | Patient258A2 |
| 425 | Patient053C  | Patient258F  |
| 425 | Patient081B  | Patient173A  |
| 425 | Patient081B  | Patient195   |
| 425 | Patient081C  | Patient183B  |
| 425 | Patient081D  | Patient183B  |
| 425 | Patient081E  | Patient261B  |
| 425 | Patient103C  | Patient258D  |
| 425 | Patient108B2 | Patient131   |
| 425 | Patient120B  | Patient258A1 |



|     |              |              |
|-----|--------------|--------------|
| 425 | Patient120B  | Patient258D  |
| 425 | Patient120C  | Patient258G  |
| 425 | Patient120D  | Patient258B  |
| 425 | Patient126A  | Patient183E  |
| 425 | Patient161B  | Patient230A  |
| 425 | Patient173A  | Patient217D  |
| 426 | Patient026B  | Patient103B  |
| 426 | Patient026C  | Patient081A1 |
| 426 | Patient026C  | Patient081A2 |
| 426 | Patient026E  | Patient103C  |
| 426 | Patient026F  | Patient103B  |
| 426 | Patient032E  | Patient150A  |
| 426 | Patient032E  | Patient150B  |
| 426 | Patient045D  | Patient079B  |
| 426 | Patient053B  | Patient258D  |
| 426 | Patient081A1 | Patient173A  |
| 426 | Patient081A1 | Patient195   |
| 426 | Patient081A2 | Patient173A  |
| 426 | Patient081F  | Patient261B  |
| 426 | Patient103C  | Patient258A1 |
| 426 | Patient103C  | Patient258A2 |
| 426 | Patient120B  | Patient150A  |
| 426 | Patient120B  | Patient150B  |
| 426 | Patient120B  | Patient258A2 |
| 426 | Patient120B  | Patient258F  |
| 426 | Patient120C  | Patient258A1 |
| 426 | Patient120C  | Patient258A2 |
| 426 | Patient120C  | Patient258D  |
| 426 | Patient120D  | Patient258D  |
| 426 | Patient126A  | Patient183D  |
| 426 | Patient131   | Patient252B  |
| 426 | Patient173A  | Patient217B  |
| 426 | Patient189B  | Patient246E  |
| 426 | Patient189E  | Patient246B  |
| 426 | Patient189E  | Patient246E  |
| 426 | Patient235F  | Patient258G  |
| 427 | Patient026A  | Patient074C  |
| 427 | Patient053B  | Patient258A1 |
| 427 | Patient053B  | Patient258A2 |
| 427 | Patient053B  | Patient258F  |
| 427 | Patient081A1 | Patient258B  |
| 427 | Patient081B  | Patient258B  |
| 427 | Patient081E  | Patient261A  |
| 427 | Patient081F  | Patient195   |
| 427 | Patient103B  | Patient258B  |
| 427 | Patient103B  | Patient258E  |
| 427 | Patient103C  | Patient258F  |
| 427 | Patient120C  | Patient150A  |
| 427 | Patient120C  | Patient258F  |
| 427 | Patient120D  | Patient258A1 |

|     |              |              |
|-----|--------------|--------------|
| 427 | Patient123A  | Patient161B  |
| 427 | Patient126C  | Patient183A  |
| 427 | Patient161B  | Patient224B  |
| 427 | Patient167   | Patient173B  |
| 427 | Patient173A  | Patient217A  |
| 427 | Patient173A  | Patient217E  |
| 427 | Patient173A  | Patient217H  |
| 427 | Patient189A  | Patient246E  |
| 427 | Patient189A  | Patient247A  |
| 427 | Patient195   | Patient251   |
| 428 | Patient026C  | Patient081C  |
| 428 | Patient026C  | Patient081D  |
| 428 | Patient032E  | Patient150C  |
| 428 | Patient081A1 | Patient183A  |
| 428 | Patient081A1 | Patient258G  |
| 428 | Patient081B  | Patient258G  |
| 428 | Patient081E  | Patient173A  |
| 428 | Patient081E  | Patient183B  |
| 428 | Patient081E  | Patient183C  |
| 428 | Patient081F  | Patient258G  |
| 428 | Patient103E  | Patient261D  |
| 428 | Patient120A  | Patient230G  |
| 428 | Patient120C  | Patient150B  |
| 428 | Patient120D  | Patient258A2 |
| 428 | Patient120D  | Patient258F  |
| 428 | Patient126C  | Patient183E  |
| 428 | Patient173A  | Patient217F  |
| 428 | Patient173B  | Patient217C  |
| 428 | Patient189B  | Patient246D  |
| 428 | Patient235F  | Patient258A1 |
| 428 | Patient235F  | Patient258A2 |
| 428 | Patient235F  | Patient258D  |
| 428 | Patient235F  | Patient258F  |
| 429 | Patient026D  | Patient092H  |
| 429 | Patient026D  | Patient167   |
| 429 | Patient081A1 | Patient173B  |
| 429 | Patient081A1 | Patient183D  |
| 429 | Patient081A1 | Patient183E  |
| 429 | Patient081A1 | Patient261D  |
| 429 | Patient081A2 | Patient258B  |
| 429 | Patient081B  | Patient173B  |
| 429 | Patient081B  | Patient183A  |
| 429 | Patient081B  | Patient258D  |
| 429 | Patient081B  | Patient261D  |
| 429 | Patient081F  | Patient183C  |
| 429 | Patient081F  | Patient258B  |
| 429 | Patient103B  | Patient258A2 |
| 429 | Patient103B  | Patient258G  |
| 429 | Patient108A  | Patient131   |
| 429 | Patient120B  | Patient150C  |

|     |              |              |
|-----|--------------|--------------|
| 429 | Patient126C  | Patient183D  |
| 429 | Patient131   | Patient252F  |
| 429 | Patient173B  | Patient217D  |
| 429 | Patient189A  | Patient246D  |
| 429 | Patient189A  | Patient247B  |
| 429 | Patient189B  | Patient247C  |
| 429 | Patient235E  | Patient258B  |
| 430 | Patient026C  | Patient081F  |
| 430 | Patient026D  | Patient092G  |
| 430 | Patient026E  | Patient092D  |
| 430 | Patient045A  | Patient183B  |
| 430 | Patient045A  | Patient183C  |
| 430 | Patient081A1 | Patient258A2 |
| 430 | Patient081A1 | Patient258D  |
| 430 | Patient081A2 | Patient173B  |
| 430 | Patient081A2 | Patient183A  |
| 430 | Patient081A2 | Patient258G  |
| 430 | Patient081A2 | Patient261D  |
| 430 | Patient081B  | Patient183D  |
| 430 | Patient081B  | Patient183E  |
| 430 | Patient081B  | Patient258A1 |
| 430 | Patient081B  | Patient258A2 |
| 430 | Patient081B  | Patient258F  |
| 430 | Patient081C  | Patient258E  |
| 430 | Patient081E  | Patient195   |
| 430 | Patient081E  | Patient258B  |
| 430 | Patient081F  | Patient173A  |
| 430 | Patient081F  | Patient183B  |
| 430 | Patient081F  | Patient258D  |
| 430 | Patient103B  | Patient258A1 |
| 430 | Patient103B  | Patient258D  |
| 430 | Patient150A  | Patient230G  |
| 430 | Patient150B  | Patient230G  |
| 430 | Patient150C  | Patient230G  |
| 430 | Patient173B  | Patient217B  |
| 430 | Patient181B  | Patient195   |
| 430 | Patient189A  | Patient247C  |
| 430 | Patient189B  | Patient247B  |
| 430 | Patient189E  | Patient247A  |
| 431 | Patient026C  | Patient126A  |
| 431 | Patient026E  | Patient103B  |
| 431 | Patient045A  | Patient145B  |
| 431 | Patient045B  | Patient183B  |
| 431 | Patient045B  | Patient183C  |
| 431 | Patient081A1 | Patient258A1 |
| 431 | Patient081A1 | Patient258F  |
| 431 | Patient081A2 | Patient183D  |
| 431 | Patient081A2 | Patient183E  |
| 431 | Patient081A2 | Patient258D  |
| 431 | Patient081C  | Patient183A  |

|     |              |              |
|-----|--------------|--------------|
| 431 | Patient081D  | Patient183A  |
| 431 | Patient081E  | Patient258G  |
| 431 | Patient092C  | Patient167   |
| 431 | Patient103B  | Patient258F  |
| 431 | Patient120C  | Patient150C  |
| 431 | Patient123C  | Patient161B  |
| 431 | Patient131   | Patient252A  |
| 431 | Patient145C  | Patient150B  |
| 431 | Patient145C  | Patient150C  |
| 431 | Patient161B  | Patient230B  |
| 431 | Patient173B  | Patient217A  |
| 431 | Patient173B  | Patient217E  |
| 431 | Patient173B  | Patient217H  |
| 431 | Patient189B  | Patient247A  |
| 431 | Patient235E  | Patient258G  |
| 432 | Patient005   | Patient201C  |
| 432 | Patient026C  | Patient081E  |
| 432 | Patient026E  | Patient092A  |
| 432 | Patient026E  | Patient192B  |
| 432 | Patient032C  | Patient150B  |
| 432 | Patient045B  | Patient145B  |
| 432 | Patient045C  | Patient183C  |
| 432 | Patient081A2 | Patient258A1 |
| 432 | Patient081A2 | Patient258A2 |
| 432 | Patient081A2 | Patient258F  |
| 432 | Patient081C  | Patient183D  |
| 432 | Patient081D  | Patient183D  |
| 432 | Patient081D  | Patient183E  |
| 432 | Patient081D  | Patient258E  |
| 432 | Patient081E  | Patient173B  |
| 432 | Patient081E  | Patient258D  |
| 432 | Patient081F  | Patient258A1 |
| 432 | Patient081F  | Patient258A2 |
| 432 | Patient081F  | Patient258F  |
| 432 | Patient081F  | Patient261D  |
| 432 | Patient092D  | Patient167   |
| 432 | Patient123B  | Patient161B  |
| 432 | Patient145C  | Patient150A  |
| 432 | Patient173B  | Patient217F  |
| 432 | Patient189E  | Patient247C  |
| 433 | Patient026C  | Patient126C  |
| 433 | Patient026C  | Patient173A  |
| 433 | Patient026E  | Patient092B  |
| 433 | Patient026E  | Patient092E  |
| 433 | Patient032C  | Patient150A  |
| 433 | Patient081C  | Patient183E  |
| 433 | Patient081E  | Patient183E  |
| 433 | Patient081E  | Patient258A1 |
| 433 | Patient081E  | Patient258A2 |
| 433 | Patient081E  | Patient258F  |

|     |             |              |
|-----|-------------|--------------|
| 433 | Patient081E | Patient261D  |
| 433 | Patient109A | Patient131   |
| 433 | Patient123A | Patient195   |
| 433 | Patient145B | Patient183B  |
| 433 | Patient145B | Patient183C  |
| 433 | Patient173A | Patient181A  |
| 433 | Patient189A | Patient247E  |
| 433 | Patient189E | Patient247B  |
| 433 | Patient217C | Patient258E  |
| 433 | Patient235E | Patient258A1 |
| 433 | Patient235E | Patient258A2 |
| 433 | Patient235E | Patient258D  |
| 433 | Patient235E | Patient258F  |
| 434 | Patient026A | Patient074D  |
| 434 | Patient032C | Patient150C  |
| 434 | Patient045C | Patient145B  |
| 434 | Patient045C | Patient183B  |
| 434 | Patient045D | Patient097A  |
| 434 | Patient081E | Patient183A  |
| 434 | Patient081F | Patient173B  |
| 434 | Patient108D | Patient131   |
| 434 | Patient108H | Patient131   |
| 434 | Patient120A | Patient230C  |
| 434 | Patient173B | Patient181A  |
| 434 | Patient189B | Patient247E  |
| 434 | Patient217D | Patient258E  |
| 435 | Patient032D | Patient183B  |
| 435 | Patient032D | Patient183C  |
| 435 | Patient045A | Patient183A  |
| 435 | Patient045A | Patient183D  |
| 435 | Patient045A | Patient183E  |
| 435 | Patient081E | Patient183D  |
| 435 | Patient081F | Patient183A  |
| 435 | Patient108G | Patient131   |
| 435 | Patient120A | Patient141G  |
| 435 | Patient120A | Patient261E  |
| 435 | Patient123B | Patient195   |
| 435 | Patient123C | Patient195   |
| 435 | Patient126A | Patient258B  |
| 435 | Patient173A | Patient217I  |
| 435 | Patient189E | Patient246D  |
| 435 | Patient217B | Patient258E  |
| 436 | Patient032D | Patient150A  |
| 436 | Patient032D | Patient150B  |
| 436 | Patient032D | Patient150C  |
| 436 | Patient066A | Patient204   |
| 436 | Patient081F | Patient183D  |
| 436 | Patient081F | Patient183E  |
| 436 | Patient120A | Patient261C  |
| 436 | Patient126A | Patient258G  |

|     |             |              |
|-----|-------------|--------------|
| 436 | Patient141G | Patient150A  |
| 436 | Patient141G | Patient150B  |
| 436 | Patient141G | Patient150C  |
| 436 | Patient145B | Patient213A  |
| 436 | Patient150B | Patient261C  |
| 436 | Patient150C | Patient261C  |
| 436 | Patient189A | Patient247D  |
| 436 | Patient189E | Patient247E  |
| 436 | Patient217A | Patient258E  |
| 436 | Patient217E | Patient258E  |
| 436 | Patient217H | Patient258E  |
| 437 | Patient005  | Patient201D  |
| 437 | Patient023  | Patient108B1 |
| 437 | Patient026C | Patient173B  |
| 437 | Patient026E | Patient092H  |
| 437 | Patient032D | Patient183E  |
| 437 | Patient045B | Patient183A  |
| 437 | Patient045B | Patient183D  |
| 437 | Patient045B | Patient183E  |
| 437 | Patient074A | Patient251   |
| 437 | Patient109B | Patient131   |
| 437 | Patient109C | Patient131   |
| 437 | Patient120A | Patient258G  |
| 437 | Patient123D | Patient161B  |
| 437 | Patient126A | Patient258D  |
| 437 | Patient126C | Patient258G  |
| 437 | Patient150A | Patient230C  |
| 437 | Patient150A | Patient261C  |
| 437 | Patient150B | Patient230C  |
| 437 | Patient150C | Patient230C  |
| 437 | Patient217F | Patient258E  |
| 438 | Patient026B | Patient195   |
| 438 | Patient026D | Patient192E  |
| 438 | Patient026E | Patient092G  |
| 438 | Patient026E | Patient167   |
| 438 | Patient026F | Patient167   |
| 438 | Patient026F | Patient195   |
| 438 | Patient045C | Patient183E  |
| 438 | Patient066D | Patient183C  |
| 438 | Patient074B | Patient251   |
| 438 | Patient092C | Patient123A  |
| 438 | Patient109E | Patient131   |
| 438 | Patient120A | Patient258B  |
| 438 | Patient126A | Patient258A1 |
| 438 | Patient126A | Patient258A2 |
| 438 | Patient126A | Patient258F  |
| 438 | Patient126C | Patient167   |
| 438 | Patient126C | Patient258B  |
| 438 | Patient145B | Patient183A  |
| 438 | Patient145B | Patient183E  |

|     |             |              |
|-----|-------------|--------------|
| 438 | Patient150A | Patient261E  |
| 438 | Patient150B | Patient261E  |
| 438 | Patient150C | Patient261E  |
| 438 | Patient161B | Patient235A  |
| 438 | Patient167  | Patient192A  |
| 438 | Patient167  | Patient235B  |
| 438 | Patient167  | Patient235F  |
| 438 | Patient213A | Patient235C  |
| 438 | Patient217C | Patient258B  |
| 438 | Patient217C | Patient258G  |
| 439 | Patient026D | Patient192F  |
| 439 | Patient032A | Patient150A  |
| 439 | Patient032A | Patient150B  |
| 439 | Patient045C | Patient183A  |
| 439 | Patient045C | Patient183D  |
| 439 | Patient045D | Patient097C  |
| 439 | Patient045D | Patient097D  |
| 439 | Patient120A | Patient258D  |
| 439 | Patient126A | Patient167   |
| 439 | Patient126C | Patient258D  |
| 439 | Patient167  | Patient192C  |
| 439 | Patient167  | Patient235C  |
| 439 | Patient173A | Patient181B  |
| 439 | Patient173A | Patient217J  |
| 439 | Patient173B | Patient217I  |
| 439 | Patient189B | Patient247D  |
| 439 | Patient213A | Patient235B  |
| 439 | Patient217D | Patient258B  |
| 440 | Patient023  | Patient108A  |
| 440 | Patient023  | Patient108B2 |
| 440 | Patient026A | Patient074E  |
| 440 | Patient026A | Patient167   |
| 440 | Patient026B | Patient167   |
| 440 | Patient032D | Patient183A  |
| 440 | Patient032D | Patient183D  |
| 440 | Patient066D | Patient183B  |
| 440 | Patient081C | Patient173A  |
| 440 | Patient081D | Patient173A  |
| 440 | Patient100B | Patient189C2 |
| 440 | Patient108F | Patient131   |
| 440 | Patient120A | Patient141F  |
| 440 | Patient120A | Patient258A1 |
| 440 | Patient126A | Patient161B  |
| 440 | Patient141F | Patient150B  |
| 440 | Patient141F | Patient150C  |
| 440 | Patient145B | Patient183D  |
| 440 | Patient173B | Patient181B  |
| 440 | Patient183C | Patient213A  |
| 440 | Patient189E | Patient247D  |
| 440 | Patient217B | Patient258B  |

|     |             |              |
|-----|-------------|--------------|
| 440 | Patient217C | Patient258D  |
| 440 | Patient217D | Patient258G  |
| 441 | Patient032A | Patient150C  |
| 441 | Patient045D | Patient149A  |
| 441 | Patient066E | Patient183C  |
| 441 | Patient074C | Patient251   |
| 441 | Patient092A | Patient167   |
| 441 | Patient092B | Patient167   |
| 441 | Patient092E | Patient167   |
| 441 | Patient120A | Patient258A2 |
| 441 | Patient120A | Patient258F  |
| 441 | Patient120D | Patient167   |
| 441 | Patient126C | Patient161B  |
| 441 | Patient126C | Patient258A1 |
| 441 | Patient126C | Patient258A2 |
| 441 | Patient126C | Patient258F  |
| 441 | Patient131  | Patient149A  |
| 441 | Patient141F | Patient150A  |
| 441 | Patient145C | Patient183B  |
| 441 | Patient145C | Patient183C  |
| 441 | Patient217A | Patient258B  |
| 441 | Patient217B | Patient258G  |
| 441 | Patient217C | Patient258A1 |
| 441 | Patient217C | Patient258A2 |
| 441 | Patient217C | Patient258F  |
| 441 | Patient217D | Patient258D  |
| 441 | Patient217E | Patient258B  |
| 441 | Patient217E | Patient258G  |
| 441 | Patient217F | Patient258G  |
| 441 | Patient217H | Patient258B  |
| 442 | Patient045D | Patient097E  |
| 442 | Patient092C | Patient123B  |
| 442 | Patient092C | Patient123C  |
| 442 | Patient100B | Patient189C1 |
| 442 | Patient167  | Patient235E  |
| 442 | Patient183B | Patient213A  |
| 442 | Patient217A | Patient258G  |
| 442 | Patient217B | Patient258D  |
| 442 | Patient217D | Patient258A1 |
| 442 | Patient217D | Patient258A2 |
| 442 | Patient217D | Patient258F  |
| 442 | Patient217F | Patient258B  |
| 442 | Patient217H | Patient258G  |
| 443 | Patient120B | Patient167   |
| 443 | Patient123D | Patient195   |
| 443 | Patient145B | Patient177   |
| 443 | Patient167  | Patient192B  |
| 443 | Patient173B | Patient217J  |
| 443 | Patient177  | Patient183C  |
| 443 | Patient217A | Patient258D  |



|     |             |              |
|-----|-------------|--------------|
| 443 | Patient217B | Patient258A1 |
| 443 | Patient217B | Patient258A2 |
| 443 | Patient217B | Patient258F  |
| 443 | Patient217E | Patient258D  |
| 443 | Patient217F | Patient258D  |
| 443 | Patient217H | Patient258D  |
| 444 | Patient023  | Patient109A  |
| 444 | Patient032A | Patient183C  |
| 444 | Patient066D | Patient183A  |
| 444 | Patient066D | Patient183E  |
| 444 | Patient081C | Patient173B  |
| 444 | Patient081D | Patient173B  |
| 444 | Patient109D | Patient131   |
| 444 | Patient120C | Patient167   |
| 444 | Patient126A | Patient181A  |
| 444 | Patient133  | Patient145C  |
| 444 | Patient183A | Patient213A  |
| 444 | Patient183C | Patient235A  |
| 444 | Patient217A | Patient258A1 |
| 444 | Patient217A | Patient258A2 |
| 444 | Patient217A | Patient258F  |
| 444 | Patient217E | Patient258A1 |
| 444 | Patient217E | Patient258A2 |
| 444 | Patient217E | Patient258F  |
| 444 | Patient217H | Patient258A1 |
| 444 | Patient217H | Patient258A2 |
| 444 | Patient217H | Patient258F  |
| 444 | Patient217I | Patient258E  |
| 445 | Patient023  | Patient108D  |
| 445 | Patient032A | Patient183B  |
| 445 | Patient032E | Patient183C  |
| 445 | Patient034B | Patient150A  |
| 445 | Patient034B | Patient150B  |
| 445 | Patient045A | Patient145C  |
| 445 | Patient066F | Patient183C  |
| 445 | Patient103C | Patient195   |
| 445 | Patient120A | Patient261G  |
| 445 | Patient133  | Patient145B  |
| 445 | Patient145B | Patient164   |
| 445 | Patient150A | Patient261G  |
| 445 | Patient150C | Patient261G  |
| 445 | Patient177  | Patient183B  |
| 445 | Patient217F | Patient258A1 |
| 445 | Patient217F | Patient258A2 |
| 445 | Patient217F | Patient258F  |
| 446 | Patient023  | Patient109B  |
| 446 | Patient026E | Patient192E  |
| 446 | Patient032B | Patient150A  |
| 446 | Patient032B | Patient150B  |
| 446 | Patient032E | Patient045A  |

|     |             |             |
|-----|-------------|-------------|
| 446 | Patient032E | Patient183B |
| 446 | Patient034B | Patient150C |
| 446 | Patient045D | Patient097B |
| 446 | Patient066D | Patient183D |
| 446 | Patient066E | Patient183B |
| 446 | Patient092A | Patient123A |
| 446 | Patient092D | Patient123A |
| 446 | Patient092H | Patient167  |
| 446 | Patient145A | Patient150A |
| 446 | Patient145A | Patient150B |
| 446 | Patient145A | Patient150C |
| 446 | Patient150B | Patient261G |
| 446 | Patient161B | Patient258B |
| 446 | Patient183B | Patient235A |
| 447 | Patient026E | Patient192F |
| 447 | Patient032A | Patient183E |
| 447 | Patient032E | Patient045B |
| 447 | Patient034A | Patient150A |
| 447 | Patient034A | Patient150B |
| 447 | Patient034A | Patient150C |
| 447 | Patient034D | Patient150B |
| 447 | Patient045B | Patient145C |
| 447 | Patient092C | Patient123D |
| 447 | Patient092E | Patient123A |
| 447 | Patient126C | Patient181A |
| 447 | Patient141D | Patient150A |
| 447 | Patient141D | Patient150B |
| 447 | Patient141D | Patient150C |
| 447 | Patient145C | Patient183A |
| 447 | Patient145C | Patient183E |
| 447 | Patient161B | Patient258G |
| 447 | Patient177  | Patient183A |
| 447 | Patient217I | Patient258B |
| 448 | Patient023  | Patient108H |
| 448 | Patient032B | Patient150C |
| 448 | Patient032C | Patient183C |
| 448 | Patient032E | Patient183E |
| 448 | Patient034D | Patient150A |
| 448 | Patient045C | Patient145C |
| 448 | Patient066E | Patient183E |
| 448 | Patient066F | Patient183B |
| 448 | Patient074D | Patient251  |
| 448 | Patient145C | Patient177  |
| 448 | Patient161B | Patient258D |
| 448 | Patient183C | Patient224B |
| 448 | Patient183D | Patient213A |
| 448 | Patient183E | Patient213A |
| 448 | Patient217I | Patient258G |
| 448 | Patient217J | Patient258E |
| 449 | Patient023  | Patient108G |

|     |             |              |
|-----|-------------|--------------|
| 449 | Patient032A | Patient183A  |
| 449 | Patient032B | Patient183B  |
| 449 | Patient032E | Patient045C  |
| 449 | Patient034A | Patient183C  |
| 449 | Patient034D | Patient150C  |
| 449 | Patient034E | Patient150A  |
| 449 | Patient034E | Patient150B  |
| 449 | Patient034E | Patient150C  |
| 449 | Patient045D | Patient252B  |
| 449 | Patient066E | Patient183A  |
| 449 | Patient092A | Patient258B  |
| 449 | Patient092B | Patient123A  |
| 449 | Patient092E | Patient258B  |
| 449 | Patient145C | Patient183D  |
| 449 | Patient161B | Patient258A1 |
| 449 | Patient161B | Patient258A2 |
| 449 | Patient161B | Patient258F  |
| 449 | Patient177  | Patient183D  |
| 449 | Patient177  | Patient183E  |
| 449 | Patient183A | Patient235A  |
| 449 | Patient183B | Patient224B  |
| 449 | Patient217I | Patient258D  |
| 450 | Patient026A | Patient150A  |
| 450 | Patient026A | Patient150B  |
| 450 | Patient032A | Patient183D  |
| 450 | Patient032B | Patient183C  |
| 450 | Patient032D | Patient045A  |
| 450 | Patient032D | Patient177   |
| 450 | Patient032E | Patient183A  |
| 450 | Patient034A | Patient183B  |
| 450 | Patient066D | Patient177   |
| 450 | Patient092A | Patient123C  |
| 450 | Patient092A | Patient258A2 |
| 450 | Patient092A | Patient258G  |
| 450 | Patient092C | Patient258B  |
| 450 | Patient092C | Patient258G  |
| 450 | Patient092D | Patient123C  |
| 450 | Patient092E | Patient123C  |
| 450 | Patient092E | Patient258G  |
| 450 | Patient092G | Patient123A  |
| 450 | Patient092G | Patient167   |
| 450 | Patient126A | Patient181B  |
| 450 | Patient217I | Patient258A1 |
| 450 | Patient217I | Patient258A2 |
| 450 | Patient217I | Patient258F  |
| 451 | Patient023  | Patient100A  |
| 451 | Patient032A | Patient045A  |
| 451 | Patient032C | Patient045A  |
| 451 | Patient032C | Patient183B  |
| 451 | Patient032D | Patient045B  |

|     |              |              |
|-----|--------------|--------------|
| 451 | Patient032E  | Patient183D  |
| 451 | Patient034D  | Patient183C  |
| 451 | Patient034E  | Patient183C  |
| 451 | Patient066E  | Patient183D  |
| 451 | Patient092A  | Patient123B  |
| 451 | Patient092A  | Patient258A1 |
| 451 | Patient092A  | Patient258D  |
| 451 | Patient092E  | Patient123B  |
| 451 | Patient092E  | Patient258A1 |
| 451 | Patient092E  | Patient258A2 |
| 451 | Patient092E  | Patient258D  |
| 451 | Patient092H  | Patient123A  |
| 451 | Patient126A  | Patient217C  |
| 451 | Patient183C  | Patient230G  |
| 451 | Patient183E  | Patient235A  |
| 452 | Patient032A  | Patient045B  |
| 452 | Patient032C  | Patient045B  |
| 452 | Patient032C  | Patient045C  |
| 452 | Patient034A  | Patient183E  |
| 452 | Patient034C  | Patient150A  |
| 452 | Patient034C  | Patient150B  |
| 452 | Patient034E  | Patient183B  |
| 452 | Patient045D  | Patient252A  |
| 452 | Patient066F  | Patient183E  |
| 452 | Patient074E  | Patient251   |
| 452 | Patient092A  | Patient258F  |
| 452 | Patient092B  | Patient123B  |
| 452 | Patient092B  | Patient123C  |
| 452 | Patient092C  | Patient258D  |
| 452 | Patient092D  | Patient123B  |
| 452 | Patient092E  | Patient258F  |
| 452 | Patient103B  | Patient195   |
| 452 | Patient126A  | Patient217D  |
| 452 | Patient126C  | Patient217C  |
| 452 | Patient150A  | Patient261B  |
| 452 | Patient150B  | Patient261B  |
| 452 | Patient150C  | Patient261A  |
| 452 | Patient150C  | Patient261B  |
| 452 | Patient183B  | Patient224A  |
| 452 | Patient183C  | Patient224A  |
| 452 | Patient192A  | Patient258B  |
| 452 | Patient217J  | Patient258G  |
| 453 | Patient032B  | Patient183E  |
| 453 | Patient032D  | Patient045C  |
| 453 | Patient032D  | Patient133   |
| 453 | Patient032E  | Patient213A  |
| 453 | Patient045A  | Patient230G  |
| 453 | Patient045B  | Patient230G  |
| 453 | Patient053A2 | Patient145B  |
| 453 | Patient066D  | Patient133   |

|     |              |              |
|-----|--------------|--------------|
| 453 | Patient066F  | Patient183A  |
| 453 | Patient081A2 | Patient133   |
| 453 | Patient081B  | Patient133   |
| 453 | Patient092C  | Patient258A1 |
| 453 | Patient092C  | Patient258A2 |
| 453 | Patient092C  | Patient258F  |
| 453 | Patient126A  | Patient217B  |
| 453 | Patient126C  | Patient181B  |
| 453 | Patient141D  | Patient183B  |
| 453 | Patient141D  | Patient183C  |
| 453 | Patient183B  | Patient230G  |
| 453 | Patient192A  | Patient258G  |
| 453 | Patient217J  | Patient258B  |
| 454 | Patient021A2 | Patient023   |
| 454 | Patient026A  | Patient150C  |
| 454 | Patient032A  | Patient045C  |
| 454 | Patient032B  | Patient183D  |
| 454 | Patient032C  | Patient183E  |
| 454 | Patient034A  | Patient183A  |
| 454 | Patient034B  | Patient183C  |
| 454 | Patient034C  | Patient150C  |
| 454 | Patient034D  | Patient183B  |
| 454 | Patient053C  | Patient145B  |
| 454 | Patient066F  | Patient183D  |
| 454 | Patient081A1 | Patient133   |
| 454 | Patient092D  | Patient258B  |
| 454 | Patient092G  | Patient123C  |
| 454 | Patient126A  | Patient217A  |
| 454 | Patient126A  | Patient217E  |
| 454 | Patient126A  | Patient217H  |
| 454 | Patient126C  | Patient217D  |
| 454 | Patient133   | Patient224B  |
| 454 | Patient145A  | Patient183B  |
| 454 | Patient145A  | Patient183C  |
| 454 | Patient150B  | Patient261A  |
| 454 | Patient183A  | Patient224B  |
| 454 | Patient183D  | Patient235A  |
| 454 | Patient183E  | Patient224B  |
| 454 | Patient192A  | Patient258A1 |
| 454 | Patient192A  | Patient258A2 |
| 454 | Patient192A  | Patient258D  |
| 454 | Patient192C  | Patient258B  |
| 454 | Patient217J  | Patient258D  |
| 455 | Patient021A1 | Patient023   |
| 455 | Patient032A  | Patient133   |
| 455 | Patient032B  | Patient183A  |
| 455 | Patient034A  | Patient183D  |
| 455 | Patient034B  | Patient183B  |
| 455 | Patient034E  | Patient183E  |
| 455 | Patient045C  | Patient230G  |

|     |             |              |
|-----|-------------|--------------|
| 455 | Patient053B | Patient145B  |
| 455 | Patient092A | Patient123D  |
| 455 | Patient092B | Patient258B  |
| 455 | Patient092B | Patient258G  |
| 455 | Patient092D | Patient123D  |
| 455 | Patient092D | Patient258G  |
| 455 | Patient092G | Patient123B  |
| 455 | Patient092H | Patient123C  |
| 455 | Patient103D | Patient123A  |
| 455 | Patient121A | Patient213A  |
| 455 | Patient126A | Patient217F  |
| 455 | Patient126C | Patient217B  |
| 455 | Patient126C | Patient217E  |
| 455 | Patient126C | Patient217F  |
| 455 | Patient150A | Patient261A  |
| 455 | Patient183C | Patient230C  |
| 455 | Patient183D | Patient224B  |
| 455 | Patient192A | Patient258F  |
| 455 | Patient192C | Patient258G  |
| 456 | Patient026D | Patient213A  |
| 456 | Patient032A | Patient177   |
| 456 | Patient032B | Patient045A  |
| 456 | Patient032C | Patient183A  |
| 456 | Patient034C | Patient183C  |
| 456 | Patient034D | Patient183E  |
| 456 | Patient045A | Patient141G  |
| 456 | Patient045D | Patient252F  |
| 456 | Patient066E | Patient177   |
| 456 | Patient081D | Patient133   |
| 456 | Patient081F | Patient133   |
| 456 | Patient092D | Patient258D  |
| 456 | Patient092E | Patient123D  |
| 456 | Patient092H | Patient123B  |
| 456 | Patient120A | Patient213A  |
| 456 | Patient126C | Patient217A  |
| 456 | Patient126C | Patient217H  |
| 456 | Patient133  | Patient224A  |
| 456 | Patient141D | Patient183A  |
| 456 | Patient141G | Patient183C  |
| 456 | Patient183A | Patient224A  |
| 456 | Patient183E | Patient230G  |
| 456 | Patient192C | Patient258A1 |
| 456 | Patient192C | Patient258D  |
| 456 | Patient217J | Patient258A1 |
| 456 | Patient217J | Patient258A2 |
| 456 | Patient217J | Patient258F  |
| 457 | Patient032B | Patient133   |
| 457 | Patient032C | Patient183D  |
| 457 | Patient032C | Patient213A  |
| 457 | Patient032E | Patient133   |

|     |              |              |
|-----|--------------|--------------|
| 457 | Patient034B  | Patient183E  |
| 457 | Patient034C  | Patient183B  |
| 457 | Patient034E  | Patient183A  |
| 457 | Patient045B  | Patient141G  |
| 457 | Patient066E  | Patient133   |
| 457 | Patient066F  | Patient177   |
| 457 | Patient092B  | Patient258A2 |
| 457 | Patient092B  | Patient258D  |
| 457 | Patient092D  | Patient258F  |
| 457 | Patient103A  | Patient150B  |
| 457 | Patient103D  | Patient173A  |
| 457 | Patient133   | Patient145A  |
| 457 | Patient141G  | Patient183B  |
| 457 | Patient164   | Patient167   |
| 457 | Patient167   | Patient192E  |
| 457 | Patient181A  | Patient183B  |
| 457 | Patient181A  | Patient183C  |
| 457 | Patient183A  | Patient230G  |
| 457 | Patient183C  | Patient261E  |
| 457 | Patient192C  | Patient258F  |
| 457 | Patient213A  | Patient230G  |
| 458 | Patient023   | Patient109C  |
| 458 | Patient026A  | Patient195   |
| 458 | Patient032B  | Patient045B  |
| 458 | Patient032E  | Patient164   |
| 458 | Patient034A  | Patient045A  |
| 458 | Patient034D  | Patient183A  |
| 458 | Patient034E  | Patient183D  |
| 458 | Patient066F  | Patient133   |
| 458 | Patient081A2 | Patient177   |
| 458 | Patient081B  | Patient177   |
| 458 | Patient081C  | Patient133   |
| 458 | Patient081D  | Patient177   |
| 458 | Patient081E  | Patient133   |
| 458 | Patient092B  | Patient123D  |
| 458 | Patient092B  | Patient258A1 |
| 458 | Patient092B  | Patient258F  |
| 458 | Patient092D  | Patient258A1 |
| 458 | Patient092D  | Patient258A2 |
| 458 | Patient103A  | Patient150A  |
| 458 | Patient103D  | Patient123C  |
| 458 | Patient141D  | Patient183D  |
| 458 | Patient167   | Patient192F  |
| 458 | Patient183B  | Patient230C  |
| 458 | Patient183B  | Patient261E  |
| 458 | Patient183C  | Patient261A  |
| 458 | Patient183C  | Patient261B  |
| 458 | Patient183C  | Patient261C  |
| 458 | Patient183D  | Patient224A  |
| 458 | Patient183D  | Patient230G  |

|     |              |              |
|-----|--------------|--------------|
| 458 | Patient183E  | Patient224A  |
| 458 | Patient192C  | Patient258A2 |
| 459 | Patient032B  | Patient177   |
| 459 | Patient032E  | Patient177   |
| 459 | Patient034A  | Patient045B  |
| 459 | Patient034A  | Patient133   |
| 459 | Patient034B  | Patient045A  |
| 459 | Patient034B  | Patient183A  |
| 459 | Patient034C  | Patient183E  |
| 459 | Patient034D  | Patient183D  |
| 459 | Patient045A  | Patient145A  |
| 459 | Patient045A  | Patient230C  |
| 459 | Patient045C  | Patient141G  |
| 459 | Patient081C  | Patient177   |
| 459 | Patient092G  | Patient123D  |
| 459 | Patient103A  | Patient150C  |
| 459 | Patient103D  | Patient123B  |
| 459 | Patient103D  | Patient173B  |
| 459 | Patient103E  | Patient123A  |
| 459 | Patient133   | Patient167   |
| 459 | Patient145A  | Patient183A  |
| 459 | Patient145A  | Patient183E  |
| 459 | Patient150A  | Patient261D  |
| 459 | Patient150C  | Patient261D  |
| 459 | Patient177   | Patient224B  |
| 459 | Patient183B  | Patient261B  |
| 460 | Patient032B  | Patient045C  |
| 460 | Patient032C  | Patient133   |
| 460 | Patient034B  | Patient045B  |
| 460 | Patient034B  | Patient183D  |
| 460 | Patient034D  | Patient045A  |
| 460 | Patient034E  | Patient045A  |
| 460 | Patient045A  | Patient141D  |
| 460 | Patient045B  | Patient145A  |
| 460 | Patient074B  | Patient133   |
| 460 | Patient081A1 | Patient177   |
| 460 | Patient092H  | Patient123D  |
| 460 | Patient092H  | Patient258B  |
| 460 | Patient092H  | Patient258G  |
| 460 | Patient121A  | Patient123A  |
| 460 | Patient141D  | Patient183E  |
| 460 | Patient141F  | Patient183C  |
| 460 | Patient141G  | Patient183E  |
| 460 | Patient145A  | Patient177   |
| 460 | Patient150B  | Patient261D  |
| 460 | Patient181A  | Patient183A  |
| 460 | Patient183B  | Patient261C  |
| 460 | Patient183E  | Patient230C  |
| 460 | Patient192B  | Patient258B  |
| 460 | Patient192B  | Patient258G  |



|     |             |              |
|-----|-------------|--------------|
| 461 | Patient023  | Patient109D  |
| 461 | Patient023  | Patient109E  |
| 461 | Patient026D | Patient120D  |
| 461 | Patient034A | Patient045C  |
| 461 | Patient034B | Patient133   |
| 461 | Patient034C | Patient183A  |
| 461 | Patient034D | Patient045B  |
| 461 | Patient034D | Patient045C  |
| 461 | Patient034D | Patient133   |
| 461 | Patient034E | Patient045B  |
| 461 | Patient045A | Patient261E  |
| 461 | Patient045B | Patient141D  |
| 461 | Patient045B | Patient230C  |
| 461 | Patient074A | Patient133   |
| 461 | Patient091B | Patient201C  |
| 461 | Patient092H | Patient258A2 |
| 461 | Patient103C | Patient183C  |
| 461 | Patient103E | Patient173A  |
| 461 | Patient141C | Patient183C  |
| 461 | Patient141G | Patient183A  |
| 461 | Patient145A | Patient183D  |
| 461 | Patient145C | Patient176   |
| 461 | Patient183B | Patient261A  |
| 462 | Patient026E | Patient213A  |
| 462 | Patient032C | Patient164   |
| 462 | Patient034A | Patient177   |
| 462 | Patient034B | Patient045C  |
| 462 | Patient034C | Patient183D  |
| 462 | Patient034E | Patient133   |
| 462 | Patient045A | Patient141F  |
| 462 | Patient045A | Patient261B  |
| 462 | Patient045B | Patient261E  |
| 462 | Patient045C | Patient141D  |
| 462 | Patient045C | Patient145A  |
| 462 | Patient074B | Patient183C  |
| 462 | Patient092G | Patient258B  |
| 462 | Patient092G | Patient258G  |
| 462 | Patient092H | Patient258A1 |
| 462 | Patient092H | Patient258D  |
| 462 | Patient121B | Patient213A  |
| 462 | Patient141F | Patient183B  |
| 462 | Patient141G | Patient183D  |
| 462 | Patient145B | Patient176   |
| 462 | Patient161B | Patient177   |
| 462 | Patient181A | Patient183D  |
| 462 | Patient181A | Patient183E  |
| 462 | Patient183A | Patient261E  |
| 462 | Patient183E | Patient261C  |
| 462 | Patient183E | Patient261E  |
| 462 | Patient192B | Patient258A1 |

|     |              |              |
|-----|--------------|--------------|
| 462 | Patient192B  | Patient258D  |
| 463 | Patient034B  | Patient177   |
| 463 | Patient034C  | Patient045A  |
| 463 | Patient034E  | Patient045C  |
| 463 | Patient045A  | Patient120D  |
| 463 | Patient045A  | Patient261C  |
| 463 | Patient045B  | Patient141F  |
| 463 | Patient045B  | Patient261B  |
| 463 | Patient045C  | Patient230C  |
| 463 | Patient074A  | Patient183C  |
| 463 | Patient074B  | Patient183B  |
| 463 | Patient081A2 | Patient217C  |
| 463 | Patient081B  | Patient217C  |
| 463 | Patient092G  | Patient258A2 |
| 463 | Patient092G  | Patient258D  |
| 463 | Patient092H  | Patient258F  |
| 463 | Patient103D  | Patient123D  |
| 463 | Patient103E  | Patient123C  |
| 463 | Patient103E  | Patient173B  |
| 463 | Patient126A  | Patient217I  |
| 463 | Patient141C  | Patient183B  |
| 463 | Patient141D  | Patient177   |
| 463 | Patient145B  | Patient235F  |
| 463 | Patient177   | Patient224A  |
| 463 | Patient177   | Patient230G  |
| 463 | Patient183A  | Patient230C  |
| 463 | Patient183A  | Patient261A  |
| 463 | Patient183A  | Patient261B  |
| 463 | Patient183E  | Patient261B  |
| 463 | Patient192B  | Patient258A2 |
| 463 | Patient192B  | Patient258F  |
| 463 | Patient192D  | Patient224A  |
| 464 | Patient032D  | Patient213A  |
| 464 | Patient032E  | Patient053A2 |
| 464 | Patient034C  | Patient045B  |
| 464 | Patient034D  | Patient177   |
| 464 | Patient045A  | Patient261A  |
| 464 | Patient045B  | Patient120D  |
| 464 | Patient045B  | Patient261C  |
| 464 | Patient045C  | Patient141F  |
| 464 | Patient045C  | Patient261E  |
| 464 | Patient053A2 | Patient183C  |
| 464 | Patient053C  | Patient183C  |
| 464 | Patient081A1 | Patient217C  |
| 464 | Patient081A2 | Patient217D  |
| 464 | Patient081B  | Patient217D  |
| 464 | Patient081E  | Patient177   |
| 464 | Patient081F  | Patient177   |
| 464 | Patient081F  | Patient217C  |
| 464 | Patient092G  | Patient258A1 |

|     |              |             |
|-----|--------------|-------------|
| 464 | Patient092G  | Patient258F |
| 464 | Patient103C  | Patient183B |
| 464 | Patient120A  | Patient183C |
| 464 | Patient121A  | Patient123C |
| 464 | Patient126C  | Patient217I |
| 464 | Patient133   | Patient141C |
| 464 | Patient133   | Patient141D |
| 464 | Patient145B  | Patient235C |
| 464 | Patient145C  | Patient164  |
| 464 | Patient183A  | Patient261C |
| 464 | Patient183C  | Patient261D |
| 464 | Patient183D  | Patient230C |
| 464 | Patient183D  | Patient261E |
| 464 | Patient213A  | Patient230C |
| 464 | Patient213A  | Patient261E |
| 465 | Patient026B  | Patient150B |
| 465 | Patient026C  | Patient161B |
| 465 | Patient026D  | Patient120B |
| 465 | Patient026D  | Patient150A |
| 465 | Patient026D  | Patient150B |
| 465 | Patient026D  | Patient150C |
| 465 | Patient026F  | Patient213A |
| 465 | Patient032C  | Patient177  |
| 465 | Patient032E  | Patient053C |
| 465 | Patient034C  | Patient133  |
| 465 | Patient034E  | Patient177  |
| 465 | Patient045A  | Patient120B |
| 465 | Patient045C  | Patient120D |
| 465 | Patient045C  | Patient261B |
| 465 | Patient045C  | Patient261C |
| 465 | Patient053A2 | Patient183B |
| 465 | Patient053B  | Patient183C |
| 465 | Patient053C  | Patient183B |
| 465 | Patient081A1 | Patient217D |
| 465 | Patient081A2 | Patient217H |
| 465 | Patient103E  | Patient123B |
| 465 | Patient121A  | Patient123B |
| 465 | Patient141B  | Patient183C |
| 465 | Patient141F  | Patient183E |
| 465 | Patient141G  | Patient213A |
| 465 | Patient145B  | Patient235B |
| 465 | Patient183D  | Patient261B |
| 465 | Patient213A  | Patient261C |
| 466 | Patient023   | Patient108F |
| 466 | Patient026B  | Patient150A |
| 466 | Patient032E  | Patient053B |
| 466 | Patient034C  | Patient045C |
| 466 | Patient045B  | Patient120B |
| 466 | Patient045B  | Patient261A |
| 466 | Patient045C  | Patient261A |

|     |              |             |
|-----|--------------|-------------|
| 466 | Patient053B  | Patient183B |
| 466 | Patient074A  | Patient183B |
| 466 | Patient074C  | Patient133  |
| 466 | Patient074C  | Patient183C |
| 466 | Patient081A2 | Patient217B |
| 466 | Patient081B  | Patient217B |
| 466 | Patient081B  | Patient217H |
| 466 | Patient081C  | Patient217C |
| 466 | Patient081D  | Patient217C |
| 466 | Patient081F  | Patient217D |
| 466 | Patient103A  | Patient183C |
| 466 | Patient120B  | Patient192A |
| 466 | Patient120D  | Patient192A |
| 466 | Patient126A  | Patient217J |
| 466 | Patient126C  | Patient217J |
| 466 | Patient133   | Patient141B |
| 466 | Patient141A  | Patient183C |
| 466 | Patient141B  | Patient183B |
| 466 | Patient141C  | Patient183E |
| 466 | Patient141F  | Patient183A |
| 466 | Patient145C  | Patient213A |
| 466 | Patient183D  | Patient261A |
| 466 | Patient183E  | Patient261A |
| 467 | Patient026B  | Patient092C |
| 467 | Patient026B  | Patient213A |
| 467 | Patient026D  | Patient120C |
| 467 | Patient032D  | Patient176  |
| 467 | Patient034C  | Patient177  |
| 467 | Patient045A  | Patient120C |
| 467 | Patient074B  | Patient183A |
| 467 | Patient074B  | Patient183E |
| 467 | Patient081A1 | Patient217H |
| 467 | Patient081A2 | Patient217A |
| 467 | Patient081A2 | Patient217E |
| 467 | Patient081A2 | Patient217F |
| 467 | Patient081B  | Patient217A |
| 467 | Patient081B  | Patient217E |
| 467 | Patient081C  | Patient217D |
| 467 | Patient081D  | Patient217D |
| 467 | Patient091B  | Patient201D |
| 467 | Patient103B  | Patient183C |
| 467 | Patient103C  | Patient133  |
| 467 | Patient103E  | Patient123D |
| 467 | Patient120A  | Patient183B |
| 467 | Patient141C  | Patient183A |
| 467 | Patient145B  | Patient235E |
| 467 | Patient164   | Patient251  |
| 467 | Patient181B  | Patient183C |
| 467 | Patient183B  | Patient261D |
| 467 | Patient183C  | Patient261G |

|     |              |              |
|-----|--------------|--------------|
| 468 | Patient026F  | Patient092C  |
| 468 | Patient045B  | Patient120C  |
| 468 | Patient074B  | Patient183D  |
| 468 | Patient081A1 | Patient176   |
| 468 | Patient081A1 | Patient217B  |
| 468 | Patient081A1 | Patient217E  |
| 468 | Patient081A2 | Patient176   |
| 468 | Patient081B  | Patient176   |
| 468 | Patient081B  | Patient217F  |
| 468 | Patient081E  | Patient217C  |
| 468 | Patient081F  | Patient217B  |
| 468 | Patient081F  | Patient217E  |
| 468 | Patient081F  | Patient217F  |
| 468 | Patient081F  | Patient217H  |
| 468 | Patient103B  | Patient183B  |
| 468 | Patient121A  | Patient123D  |
| 468 | Patient133   | Patient230G  |
| 468 | Patient133   | Patient251   |
| 468 | Patient141A  | Patient183B  |
| 468 | Patient141C  | Patient183D  |
| 468 | Patient141F  | Patient183D  |
| 468 | Patient161B  | Patient195   |
| 468 | Patient164   | Patient230G  |
| 468 | Patient181B  | Patient183B  |
| 468 | Patient183B  | Patient261G  |
| 468 | Patient183C  | Patient230A  |
| 468 | Patient183C  | Patient235F  |
| 468 | Patient183D  | Patient261C  |
| 469 | Patient026A  | Patient213A  |
| 469 | Patient026B  | Patient150C  |
| 469 | Patient026E  | Patient120D  |
| 469 | Patient026F  | Patient150B  |
| 469 | Patient032C  | Patient053A2 |
| 469 | Patient032D  | Patient164   |
| 469 | Patient045C  | Patient120B  |
| 469 | Patient053A2 | Patient183A  |
| 469 | Patient081A1 | Patient217A  |
| 469 | Patient081A1 | Patient217F  |
| 469 | Patient081C  | Patient217B  |
| 469 | Patient081C  | Patient217H  |
| 469 | Patient081D  | Patient217B  |
| 469 | Patient081D  | Patient217H  |
| 469 | Patient081E  | Patient217D  |
| 469 | Patient081F  | Patient217A  |
| 469 | Patient092C  | Patient145B  |
| 469 | Patient092D  | Patient145B  |
| 469 | Patient103A  | Patient183B  |
| 469 | Patient103C  | Patient183A  |
| 469 | Patient103C  | Patient183E  |
| 469 | Patient120B  | Patient192C  |

|     |              |             |
|-----|--------------|-------------|
| 469 | Patient120C  | Patient192A |
| 469 | Patient120D  | Patient192C |
| 469 | Patient126C  | Patient177  |
| 469 | Patient141B  | Patient183E |
| 469 | Patient177   | Patient261E |
| 469 | Patient183B  | Patient230A |
| 469 | Patient183B  | Patient235F |
| 469 | Patient183C  | Patient230E |
| 470 | Patient022B  | Patient032D |
| 470 | Patient026F  | Patient150A |
| 470 | Patient032C  | Patient053C |
| 470 | Patient053A2 | Patient183D |
| 470 | Patient053A2 | Patient183E |
| 470 | Patient053C  | Patient183A |
| 470 | Patient066D  | Patient176  |
| 470 | Patient074C  | Patient183B |
| 470 | Patient081C  | Patient217A |
| 470 | Patient081C  | Patient217E |
| 470 | Patient081C  | Patient217F |
| 470 | Patient081D  | Patient217A |
| 470 | Patient081D  | Patient217E |
| 470 | Patient081D  | Patient217F |
| 470 | Patient103C  | Patient177  |
| 470 | Patient133   | Patient141A |
| 470 | Patient133   | Patient161B |
| 470 | Patient133   | Patient261B |
| 470 | Patient141C  | Patient177  |
| 470 | Patient141F  | Patient213A |
| 470 | Patient141G  | Patient177  |
| 470 | Patient150A  | Patient161B |
| 470 | Patient164   | Patient230C |
| 470 | Patient164   | Patient261E |
| 470 | Patient177   | Patient181A |
| 470 | Patient177   | Patient230C |
| 470 | Patient177   | Patient261B |
| 470 | Patient177   | Patient261C |
| 470 | Patient181B  | Patient183A |
| 470 | Patient183E  | Patient261G |
| 471 | Patient026A  | Patient092C |
| 471 | Patient026F  | Patient150C |
| 471 | Patient032C  | Patient053B |
| 471 | Patient045A  | Patient261D |
| 471 | Patient045A  | Patient261G |
| 471 | Patient045C  | Patient120C |
| 471 | Patient053A2 | Patient167  |
| 471 | Patient053B  | Patient183A |
| 471 | Patient053C  | Patient183D |
| 471 | Patient053C  | Patient183E |
| 471 | Patient074A  | Patient183A |
| 471 | Patient074A  | Patient183E |

|     |              |             |
|-----|--------------|-------------|
| 471 | Patient081C  | Patient176  |
| 471 | Patient081D  | Patient176  |
| 471 | Patient081E  | Patient176  |
| 471 | Patient081E  | Patient217B |
| 471 | Patient081E  | Patient217H |
| 471 | Patient103C  | Patient183D |
| 471 | Patient120A  | Patient183A |
| 471 | Patient120A  | Patient183E |
| 471 | Patient126A  | Patient177  |
| 471 | Patient133   | Patient181A |
| 471 | Patient133   | Patient230C |
| 471 | Patient133   | Patient261A |
| 471 | Patient133   | Patient261E |
| 471 | Patient141A  | Patient183E |
| 471 | Patient141B  | Patient183A |
| 471 | Patient141G  | Patient164  |
| 471 | Patient150B  | Patient161B |
| 471 | Patient164   | Patient261C |
| 471 | Patient183A  | Patient261D |
| 471 | Patient183C  | Patient230F |
| 471 | Patient183E  | Patient261D |
| 472 | Patient026B  | Patient092D |
| 472 | Patient032A  | Patient176  |
| 472 | Patient045B  | Patient261D |
| 472 | Patient045B  | Patient261G |
| 472 | Patient045C  | Patient261D |
| 472 | Patient053B  | Patient183D |
| 472 | Patient053B  | Patient183E |
| 472 | Patient053C  | Patient167  |
| 472 | Patient074A  | Patient183D |
| 472 | Patient074B  | Patient177  |
| 472 | Patient074D  | Patient133  |
| 472 | Patient081E  | Patient217A |
| 472 | Patient081E  | Patient217E |
| 472 | Patient103B  | Patient133  |
| 472 | Patient103B  | Patient177  |
| 472 | Patient120C  | Patient192C |
| 472 | Patient121B  | Patient123A |
| 472 | Patient133   | Patient230F |
| 472 | Patient133   | Patient261C |
| 472 | Patient141B  | Patient177  |
| 472 | Patient141B  | Patient183D |
| 472 | Patient161B  | Patient258E |
| 472 | Patient183A  | Patient261G |
| 472 | Patient183B  | Patient230E |
| 472 | Patient183C  | Patient235E |
| 473 | Patient021A1 | Patient189B |
| 473 | Patient021A2 | Patient189B |
| 473 | Patient026E  | Patient120B |
| 473 | Patient026E  | Patient150A |

|     |              |             |
|-----|--------------|-------------|
| 473 | Patient026E  | Patient150B |
| 473 | Patient026E  | Patient150C |
| 473 | Patient026F  | Patient092D |
| 473 | Patient032A  | Patient213A |
| 473 | Patient053A2 | Patient230G |
| 473 | Patient053B  | Patient167  |
| 473 | Patient053C  | Patient230G |
| 473 | Patient074C  | Patient183A |
| 473 | Patient074C  | Patient183E |
| 473 | Patient081E  | Patient217F |
| 473 | Patient103A  | Patient133  |
| 473 | Patient103D  | Patient126A |
| 473 | Patient103D  | Patient192D |
| 473 | Patient120A  | Patient150B |
| 473 | Patient120A  | Patient183D |
| 473 | Patient120D  | Patient192B |
| 473 | Patient133   | Patient230E |
| 473 | Patient141A  | Patient183A |
| 473 | Patient150C  | Patient161B |
| 473 | Patient183A  | Patient235F |
| 473 | Patient183B  | Patient235E |
| 473 | Patient213A  | Patient258B |
| 473 | Patient213A  | Patient258G |
| 474 | Patient021A2 | Patient189A |
| 474 | Patient026A  | Patient092D |
| 474 | Patient032A  | Patient164  |
| 474 | Patient032E  | Patient176  |
| 474 | Patient045A  | Patient103A |
| 474 | Patient045C  | Patient261G |
| 474 | Patient074B  | Patient161B |
| 474 | Patient081A2 | Patient217I |
| 474 | Patient081B  | Patient217I |
| 474 | Patient081F  | Patient176  |
| 474 | Patient092C  | Patient183C |
| 474 | Patient103A  | Patient183A |
| 474 | Patient103A  | Patient183E |
| 474 | Patient103B  | Patient183A |
| 474 | Patient103C  | Patient150B |
| 474 | Patient103C  | Patient150C |
| 474 | Patient103D  | Patient126C |
| 474 | Patient120A  | Patient150A |
| 474 | Patient120B  | Patient192B |
| 474 | Patient141A  | Patient183D |
| 474 | Patient167   | Patient176  |
| 474 | Patient177   | Patient261A |
| 474 | Patient181B  | Patient183D |
| 474 | Patient181B  | Patient183E |
| 474 | Patient183A  | Patient230A |
| 474 | Patient183B  | Patient230F |
| 474 | Patient183C  | Patient230B |



|     |              |             |
|-----|--------------|-------------|
| 474 | Patient183D  | Patient261D |
| 474 | Patient183E  | Patient230A |
| 474 | Patient183E  | Patient230E |
| 474 | Patient183E  | Patient235F |
| 474 | Patient192E  | Patient258B |
| 474 | Patient192E  | Patient258G |
| 475 | Patient021A2 | Patient189E |
| 475 | Patient026B  | Patient092A |
| 475 | Patient026E  | Patient120C |
| 475 | Patient026F  | Patient092A |
| 475 | Patient034A  | Patient176  |
| 475 | Patient045B  | Patient103A |
| 475 | Patient045C  | Patient103A |
| 475 | Patient053B  | Patient230G |
| 475 | Patient066D  | Patient173A |
| 475 | Patient066E  | Patient176  |
| 475 | Patient074A  | Patient177  |
| 475 | Patient074C  | Patient183D |
| 475 | Patient074D  | Patient183C |
| 475 | Patient081A1 | Patient217I |
| 475 | Patient081C  | Patient217I |
| 475 | Patient081D  | Patient217I |
| 475 | Patient103B  | Patient183D |
| 475 | Patient103B  | Patient183E |
| 475 | Patient103C  | Patient150A |
| 475 | Patient133   | Patient141G |
| 475 | Patient133   | Patient230A |
| 475 | Patient133   | Patient230D |
| 475 | Patient141F  | Patient177  |
| 475 | Patient145A  | Patient176  |
| 475 | Patient150A  | Patient224A |
| 475 | Patient150B  | Patient224A |
| 475 | Patient161B  | Patient192D |
| 475 | Patient183B  | Patient230B |
| 475 | Patient183C  | Patient235B |
| 475 | Patient183D  | Patient230A |
| 475 | Patient183E  | Patient230F |
| 475 | Patient192F  | Patient258G |
| 475 | Patient213A  | Patient258D |
| 475 | Patient213A  | Patient261G |
| 476 | Patient022B  | Patient167  |
| 476 | Patient023   | Patient126D |
| 476 | Patient026B  | Patient092E |
| 476 | Patient026F  | Patient092E |
| 476 | Patient032B  | Patient176  |
| 476 | Patient032C  | Patient176  |
| 476 | Patient034A  | Patient164  |
| 476 | Patient074D  | Patient183B |
| 476 | Patient081F  | Patient217I |
| 476 | Patient103A  | Patient183D |

|     |              |              |
|-----|--------------|--------------|
| 476 | Patient120A  | Patient150C  |
| 476 | Patient120D  | Patient183C  |
| 476 | Patient121B  | Patient123C  |
| 476 | Patient141F  | Patient164   |
| 476 | Patient150C  | Patient224A  |
| 476 | Patient183A  | Patient230E  |
| 476 | Patient183B  | Patient235B  |
| 476 | Patient183C  | Patient235C  |
| 476 | Patient183D  | Patient261G  |
| 476 | Patient192D  | Patient235F  |
| 476 | Patient192E  | Patient258A1 |
| 476 | Patient192E  | Patient258D  |
| 476 | Patient192F  | Patient258B  |
| 476 | Patient213A  | Patient258A1 |
| 476 | Patient213A  | Patient258A2 |
| 476 | Patient213A  | Patient258F  |
| 477 | Patient021A1 | Patient189A  |
| 477 | Patient021A1 | Patient189E  |
| 477 | Patient023   | Patient189B  |
| 477 | Patient026B  | Patient092B  |
| 477 | Patient026F  | Patient092B  |
| 477 | Patient026F  | Patient261B  |
| 477 | Patient034E  | Patient176   |
| 477 | Patient066F  | Patient176   |
| 477 | Patient074A  | Patient161B  |
| 477 | Patient092C  | Patient183B  |
| 477 | Patient103A  | Patient177   |
| 477 | Patient103E  | Patient126A  |
| 477 | Patient103E  | Patient192D  |
| 477 | Patient120C  | Patient192B  |
| 477 | Patient121A  | Patient161B  |
| 477 | Patient133   | Patient141F  |
| 477 | Patient141A  | Patient177   |
| 477 | Patient141D  | Patient176   |
| 477 | Patient145A  | Patient164   |
| 477 | Patient183A  | Patient230F  |
| 477 | Patient183A  | Patient235E  |
| 477 | Patient183B  | Patient235C  |
| 477 | Patient183C  | Patient230D  |
| 477 | Patient183D  | Patient230E  |
| 477 | Patient183D  | Patient235F  |
| 477 | Patient192E  | Patient258A2 |
| 477 | Patient192E  | Patient258F  |
| 477 | Patient192F  | Patient258D  |
| 477 | Patient213A  | Patient261A  |
| 477 | Patient213A  | Patient261B  |
| 478 | Patient026A  | Patient092A  |
| 478 | Patient026B  | Patient261B  |
| 478 | Patient026F  | Patient261A  |
| 478 | Patient032B  | Patient164   |

|     |              |              |
|-----|--------------|--------------|
| 478 | Patient034B  | Patient164   |
| 478 | Patient034B  | Patient176   |
| 478 | Patient034E  | Patient164   |
| 478 | Patient053A2 | Patient141G  |
| 478 | Patient066D  | Patient173B  |
| 478 | Patient074C  | Patient177   |
| 478 | Patient074D  | Patient183A  |
| 478 | Patient121B  | Patient123B  |
| 478 | Patient133   | Patient181B  |
| 478 | Patient133   | Patient261D  |
| 478 | Patient141B  | Patient176   |
| 478 | Patient145A  | Patient213A  |
| 478 | Patient145B  | Patient192A  |
| 478 | Patient164   | Patient261G  |
| 478 | Patient177   | Patient230F  |
| 478 | Patient177   | Patient261D  |
| 478 | Patient177   | Patient261G  |
| 478 | Patient183E  | Patient230D  |
| 478 | Patient183E  | Patient235E  |
| 478 | Patient192F  | Patient258A1 |
| 479 | Patient023   | Patient189A  |
| 479 | Patient026A  | Patient092E  |
| 479 | Patient026B  | Patient261A  |
| 479 | Patient026F  | Patient092H  |
| 479 | Patient032B  | Patient213A  |
| 479 | Patient034A  | Patient213A  |
| 479 | Patient034D  | Patient176   |
| 479 | Patient053B  | Patient141G  |
| 479 | Patient053C  | Patient141G  |
| 479 | Patient056   | Patient201C  |
| 479 | Patient081A2 | Patient217J  |
| 479 | Patient081B  | Patient217J  |
| 479 | Patient081E  | Patient217I  |
| 479 | Patient081F  | Patient217J  |
| 479 | Patient092A  | Patient145B  |
| 479 | Patient092D  | Patient183C  |
| 479 | Patient103B  | Patient150A  |
| 479 | Patient120A  | Patient230D  |
| 479 | Patient120D  | Patient145B  |
| 479 | Patient120D  | Patient183B  |
| 479 | Patient121B  | Patient123D  |
| 479 | Patient141C  | Patient176   |
| 479 | Patient150C  | Patient258G  |
| 479 | Patient177   | Patient230A  |
| 479 | Patient183B  | Patient230D  |
| 479 | Patient183D  | Patient230F  |
| 479 | Patient192D  | Patient235E  |
| 479 | Patient192F  | Patient258A2 |
| 479 | Patient192F  | Patient258F  |
| 480 | Patient026A  | Patient261B  |

|     |              |             |
|-----|--------------|-------------|
| 480 | Patient026B  | Patient092G |
| 480 | Patient026B  | Patient092H |
| 480 | Patient026F  | Patient092G |
| 480 | Patient032E  | Patient235B |
| 480 | Patient032E  | Patient235F |
| 480 | Patient066B  | Patient201C |
| 480 | Patient066E  | Patient173A |
| 480 | Patient074E  | Patient133  |
| 480 | Patient074E  | Patient183B |
| 480 | Patient074E  | Patient183C |
| 480 | Patient081A1 | Patient217J |
| 480 | Patient092B  | Patient145B |
| 480 | Patient092C  | Patient183A |
| 480 | Patient103B  | Patient150B |
| 480 | Patient103E  | Patient126C |
| 480 | Patient133   | Patient230B |
| 480 | Patient133   | Patient261G |
| 480 | Patient145B  | Patient192C |
| 480 | Patient150A  | Patient258B |
| 480 | Patient150B  | Patient258B |
| 480 | Patient150C  | Patient258B |
| 480 | Patient183A  | Patient230B |
| 480 | Patient183A  | Patient235B |
| 480 | Patient183E  | Patient230B |
| 480 | Patient258E  | Patient261B |
| 481 | Patient026A  | Patient092B |
| 481 | Patient026C  | Patient092C |
| 481 | Patient032E  | Patient235C |
| 481 | Patient034D  | Patient164  |
| 481 | Patient034D  | Patient213A |
| 481 | Patient053A2 | Patient141F |
| 481 | Patient053A2 | Patient230C |
| 481 | Patient053A2 | Patient261E |
| 481 | Patient074C  | Patient161B |
| 481 | Patient074D  | Patient183D |
| 481 | Patient074D  | Patient183E |
| 481 | Patient081C  | Patient217J |
| 481 | Patient081D  | Patient217J |
| 481 | Patient092C  | Patient183E |
| 481 | Patient120B  | Patient145B |
| 481 | Patient141D  | Patient164  |
| 481 | Patient150B  | Patient258G |
| 481 | Patient177   | Patient181B |
| 481 | Patient183A  | Patient235C |
| 481 | Patient183D  | Patient230B |
| 481 | Patient183D  | Patient235E |
| 481 | Patient183E  | Patient235B |
| 482 | Patient026A  | Patient092H |
| 482 | Patient034B  | Patient213A |
| 482 | Patient034C  | Patient176  |

|     |              |              |
|-----|--------------|--------------|
| 482 | Patient034E  | Patient213A  |
| 482 | Patient053C  | Patient141F  |
| 482 | Patient053C  | Patient230C  |
| 482 | Patient053C  | Patient261E  |
| 482 | Patient092A  | Patient258E  |
| 482 | Patient092D  | Patient183A  |
| 482 | Patient092D  | Patient183B  |
| 482 | Patient092E  | Patient258E  |
| 482 | Patient103B  | Patient150C  |
| 482 | Patient120C  | Patient145B  |
| 482 | Patient141D  | Patient213A  |
| 482 | Patient150A  | Patient258G  |
| 482 | Patient150C  | Patient258D  |
| 482 | Patient183E  | Patient235C  |
| 482 | Patient189C2 | Patient193   |
| 482 | Patient258E  | Patient261A  |
| 483 | Patient026A  | Patient092G  |
| 483 | Patient026A  | Patient261A  |
| 483 | Patient026F  | Patient261D  |
| 483 | Patient053B  | Patient141F  |
| 483 | Patient053B  | Patient230C  |
| 483 | Patient053B  | Patient261E  |
| 483 | Patient066A  | Patient205   |
| 483 | Patient066E  | Patient173B  |
| 483 | Patient066F  | Patient173A  |
| 483 | Patient092C  | Patient258E  |
| 483 | Patient092E  | Patient145B  |
| 483 | Patient120B  | Patient183C  |
| 483 | Patient120D  | Patient183A  |
| 483 | Patient120D  | Patient183E  |
| 483 | Patient150C  | Patient258A1 |
| 483 | Patient150C  | Patient258A2 |
| 483 | Patient150C  | Patient258F  |
| 483 | Patient183A  | Patient230D  |
| 483 | Patient213A  | Patient261D  |
| 484 | Patient023   | Patient189E  |
| 484 | Patient026B  | Patient261D  |
| 484 | Patient032E  | Patient235E  |
| 484 | Patient053A2 | Patient261C  |
| 484 | Patient056   | Patient201D  |
| 484 | Patient074D  | Patient177   |
| 484 | Patient081C  | Patient121A  |
| 484 | Patient081D  | Patient121A  |
| 484 | Patient081E  | Patient217J  |
| 484 | Patient092C  | Patient183D  |
| 484 | Patient092H  | Patient145B  |
| 484 | Patient121A  | Patient230D  |
| 484 | Patient126A  | Patient150C  |
| 484 | Patient126C  | Patient150B  |
| 484 | Patient145B  | Patient192B  |

|     |              |              |
|-----|--------------|--------------|
| 484 | Patient150B  | Patient258D  |
| 484 | Patient176   | Patient230G  |
| 484 | Patient177   | Patient230B  |
| 484 | Patient177   | Patient230E  |
| 484 | Patient183D  | Patient230D  |
| 484 | Patient183D  | Patient235B  |
| 484 | Patient189C1 | Patient193   |
| 485 | Patient034C  | Patient164   |
| 485 | Patient053C  | Patient261C  |
| 485 | Patient074E  | Patient183A  |
| 485 | Patient074E  | Patient183D  |
| 485 | Patient074E  | Patient183E  |
| 485 | Patient092A  | Patient183C  |
| 485 | Patient092D  | Patient183E  |
| 485 | Patient120B  | Patient183B  |
| 485 | Patient120C  | Patient183B  |
| 485 | Patient120C  | Patient183C  |
| 485 | Patient120D  | Patient183D  |
| 485 | Patient126A  | Patient150A  |
| 485 | Patient126A  | Patient150B  |
| 485 | Patient126C  | Patient150A  |
| 485 | Patient126C  | Patient150C  |
| 485 | Patient141A  | Patient176   |
| 485 | Patient141G  | Patient176   |
| 485 | Patient150A  | Patient258A1 |
| 485 | Patient150A  | Patient258A2 |
| 485 | Patient150A  | Patient258D  |
| 485 | Patient150A  | Patient258F  |
| 485 | Patient150B  | Patient258A1 |
| 485 | Patient150B  | Patient258A2 |
| 485 | Patient150B  | Patient258F  |
| 485 | Patient176   | Patient230C  |
| 485 | Patient183C  | Patient195   |
| 485 | Patient183D  | Patient235C  |
| 485 | Patient230G  | Patient235F  |
| 486 | Patient034C  | Patient213A  |
| 486 | Patient053A2 | Patient081D  |
| 486 | Patient053B  | Patient261C  |
| 486 | Patient066B  | Patient201D  |
| 486 | Patient066F  | Patient173B  |
| 486 | Patient092A  | Patient183A  |
| 486 | Patient092A  | Patient183B  |
| 486 | Patient092G  | Patient145B  |
| 486 | Patient161B  | Patient176   |
| 486 | Patient176   | Patient261A  |
| 486 | Patient176   | Patient261B  |
| 486 | Patient176   | Patient261E  |
| 486 | Patient230G  | Patient235C  |
| 487 | Patient053A2 | Patient081C  |
| 487 | Patient053C  | Patient081D  |

|     |             |              |
|-----|-------------|--------------|
| 487 | Patient092B | Patient183C  |
| 487 | Patient092C | Patient217C  |
| 487 | Patient092D | Patient258E  |
| 487 | Patient092E | Patient183C  |
| 487 | Patient120D | Patient192E  |
| 487 | Patient150A | Patient173A  |
| 487 | Patient176  | Patient261C  |
| 487 | Patient213A | Patient235A  |
| 487 | Patient230G | Patient235B  |
| 488 | Patient026A | Patient261D  |
| 488 | Patient026C | Patient092D  |
| 488 | Patient032C | Patient235B  |
| 488 | Patient032C | Patient235F  |
| 488 | Patient032E | Patient092C  |
| 488 | Patient053B | Patient081D  |
| 488 | Patient053C | Patient081C  |
| 488 | Patient074D | Patient161B  |
| 488 | Patient074E | Patient177   |
| 488 | Patient092B | Patient258E  |
| 488 | Patient092C | Patient217D  |
| 488 | Patient092D | Patient183D  |
| 488 | Patient092E | Patient183A  |
| 488 | Patient092E | Patient183B  |
| 488 | Patient120B | Patient192E  |
| 488 | Patient120D | Patient192F  |
| 488 | Patient121B | Patient161B  |
| 488 | Patient141B | Patient173A  |
| 488 | Patient150B | Patient173A  |
| 488 | Patient150C | Patient173A  |
| 488 | Patient258E | Patient261D  |
| 489 | Patient026C | Patient092A  |
| 489 | Patient032C | Patient235C  |
| 489 | Patient032E | Patient092D  |
| 489 | Patient045A | Patient150A  |
| 489 | Patient045A | Patient150B  |
| 489 | Patient053B | Patient081C  |
| 489 | Patient092B | Patient183B  |
| 489 | Patient092C | Patient217H  |
| 489 | Patient092G | Patient183C  |
| 489 | Patient114  | Patient189C2 |
| 489 | Patient120B | Patient183A  |
| 489 | Patient120B | Patient183E  |
| 489 | Patient141C | Patient173A  |
| 489 | Patient176  | Patient230F  |
| 489 | Patient177  | Patient230D  |
| 489 | Patient230C | Patient235F  |
| 489 | Patient235F | Patient261C  |
| 490 | Patient032E | Patient192A  |
| 490 | Patient045B | Patient150A  |
| 490 | Patient045B | Patient150B  |

|     |              |              |
|-----|--------------|--------------|
| 490 | Patient081C  | Patient235F  |
| 490 | Patient081D  | Patient235F  |
| 490 | Patient092A  | Patient183E  |
| 490 | Patient092B  | Patient183A  |
| 490 | Patient092C  | Patient217B  |
| 490 | Patient092C  | Patient217E  |
| 490 | Patient092C  | Patient217F  |
| 490 | Patient092E  | Patient183E  |
| 490 | Patient092G  | Patient183A  |
| 490 | Patient092H  | Patient183C  |
| 490 | Patient120B  | Patient192F  |
| 490 | Patient120C  | Patient183A  |
| 490 | Patient120C  | Patient183E  |
| 490 | Patient133   | Patient195   |
| 490 | Patient141F  | Patient176   |
| 490 | Patient141G  | Patient235F  |
| 490 | Patient161B  | Patient235F  |
| 490 | Patient176   | Patient230A  |
| 490 | Patient176   | Patient230D  |
| 490 | Patient183B  | Patient195   |
| 490 | Patient230C  | Patient235C  |
| 490 | Patient230G  | Patient235E  |
| 490 | Patient235C  | Patient261C  |
| 491 | Patient045C  | Patient150B  |
| 491 | Patient054   | Patient066A  |
| 491 | Patient092C  | Patient217A  |
| 491 | Patient092H  | Patient183A  |
| 491 | Patient100B  | Patient193   |
| 491 | Patient114   | Patient189C1 |
| 491 | Patient120B  | Patient183D  |
| 491 | Patient120C  | Patient183D  |
| 491 | Patient120C  | Patient192E  |
| 491 | Patient141B  | Patient173B  |
| 491 | Patient141G  | Patient235C  |
| 491 | Patient164   | Patient261B  |
| 491 | Patient230C  | Patient235B  |
| 491 | Patient235B  | Patient261C  |
| 492 | Patient023   | Patient079A1 |
| 492 | Patient026A  | Patient126A  |
| 492 | Patient026C  | Patient092B  |
| 492 | Patient026C  | Patient092E  |
| 492 | Patient032C  | Patient092C  |
| 492 | Patient032C  | Patient235E  |
| 492 | Patient032E  | Patient192C  |
| 492 | Patient045A  | Patient150C  |
| 492 | Patient045C  | Patient150A  |
| 492 | Patient053A2 | Patient261G  |
| 492 | Patient066D  | Patient126A  |
| 492 | Patient074E  | Patient161B  |
| 492 | Patient092A  | Patient183D  |



|     |             |              |
|-----|-------------|--------------|
| 492 | Patient092G | Patient183B  |
| 492 | Patient092H | Patient183B  |
| 492 | Patient103C | Patient192D  |
| 492 | Patient141A | Patient173A  |
| 492 | Patient141C | Patient173B  |
| 492 | Patient141G | Patient235B  |
| 492 | Patient150A | Patient173B  |
| 492 | Patient164  | Patient261A  |
| 492 | Patient235F | Patient261E  |
| 493 | Patient023  | Patient079C  |
| 493 | Patient026C | Patient092G  |
| 493 | Patient026D | Patient120A  |
| 493 | Patient045B | Patient150C  |
| 493 | Patient053C | Patient261G  |
| 493 | Patient092B | Patient183E  |
| 493 | Patient092C | Patient230G  |
| 493 | Patient120C | Patient192F  |
| 493 | Patient150B | Patient173B  |
| 493 | Patient150C | Patient173B  |
| 493 | Patient173A | Patient177   |
| 493 | Patient183E | Patient195   |
| 493 | Patient213A | Patient258E  |
| 493 | Patient230C | Patient235E  |
| 493 | Patient235C | Patient261E  |
| 493 | Patient235E | Patient261C  |
| 494 | Patient023  | Patient079A2 |
| 494 | Patient026A | Patient126C  |
| 494 | Patient026C | Patient092H  |
| 494 | Patient032C | Patient092D  |
| 494 | Patient045C | Patient150C  |
| 494 | Patient053B | Patient261G  |
| 494 | Patient066D | Patient126C  |
| 494 | Patient081C | Patient235E  |
| 494 | Patient081D | Patient235E  |
| 494 | Patient092E | Patient183D  |
| 494 | Patient092G | Patient183E  |
| 494 | Patient092H | Patient183E  |
| 494 | Patient092H | Patient258E  |
| 494 | Patient141G | Patient235E  |
| 494 | Patient173A | Patient230A  |
| 494 | Patient173B | Patient177   |
| 494 | Patient176  | Patient261D  |
| 494 | Patient183C | Patient192A  |
| 494 | Patient235B | Patient261E  |
| 495 | Patient023  | Patient079B  |
| 495 | Patient032C | Patient192A  |
| 495 | Patient032E | Patient120B  |
| 495 | Patient032E | Patient120D  |
| 495 | Patient092C | Patient217I  |
| 495 | Patient092D | Patient230G  |

|     |             |             |
|-----|-------------|-------------|
| 495 | Patient092G | Patient258E |
| 495 | Patient100B | Patient114  |
| 495 | Patient121B | Patient230D |
| 495 | Patient141A | Patient173B |
| 495 | Patient161B | Patient235E |
| 495 | Patient176  | Patient230B |
| 495 | Patient176  | Patient230E |
| 495 | Patient176  | Patient261G |
| 495 | Patient183A | Patient195  |
| 495 | Patient183B | Patient192A |
| 495 | Patient183C | Patient192C |
| 496 | Patient026C | Patient213A |
| 496 | Patient032E | Patient120C |
| 496 | Patient081C | Patient121B |
| 496 | Patient081D | Patient121B |
| 496 | Patient092A | Patient217C |
| 496 | Patient092B | Patient183D |
| 496 | Patient092D | Patient217C |
| 496 | Patient092G | Patient183D |
| 496 | Patient103A | Patient213A |
| 496 | Patient120D | Patient230G |
| 496 | Patient141F | Patient235F |
| 496 | Patient161B | Patient217C |
| 496 | Patient161B | Patient217D |
| 496 | Patient192A | Patient230G |
| 496 | Patient235E | Patient261E |
| 497 | Patient032C | Patient192C |
| 497 | Patient032E | Patient092A |
| 497 | Patient032E | Patient092B |
| 497 | Patient058  | Patient171  |
| 497 | Patient092A | Patient217D |
| 497 | Patient092D | Patient217D |
| 497 | Patient092H | Patient183D |
| 497 | Patient103A | Patient164  |
| 497 | Patient141F | Patient235C |
| 497 | Patient161B | Patient183C |
| 497 | Patient173A | Patient224B |
| 497 | Patient173B | Patient230A |
| 497 | Patient183B | Patient192C |
| 497 | Patient183D | Patient195  |
| 497 | Patient213A | Patient217C |
| 498 | Patient026D | Patient126A |
| 498 | Patient032C | Patient120B |
| 498 | Patient032C | Patient120D |
| 498 | Patient032E | Patient092E |
| 498 | Patient032E | Patient192B |
| 498 | Patient081D | Patient092D |
| 498 | Patient081D | Patient192D |
| 498 | Patient092A | Patient217B |
| 498 | Patient092C | Patient230C |

|     |              |              |
|-----|--------------|--------------|
| 498 | Patient092D  | Patient217B  |
| 498 | Patient092D  | Patient217E  |
| 498 | Patient103B  | Patient192D  |
| 498 | Patient141F  | Patient235B  |
| 498 | Patient145B  | Patient192E  |
| 498 | Patient161B  | Patient217B  |
| 498 | Patient161B  | Patient217H  |
| 498 | Patient173A  | Patient230F  |
| 498 | Patient173B  | Patient224B  |
| 498 | Patient183E  | Patient192A  |
| 498 | Patient192C  | Patient230G  |
| 498 | Patient213A  | Patient217D  |
| 499 | Patient032D  | Patient053A1 |
| 499 | Patient066E  | Patient126A  |
| 499 | Patient092A  | Patient217A  |
| 499 | Patient092A  | Patient217E  |
| 499 | Patient092A  | Patient217H  |
| 499 | Patient092B  | Patient217C  |
| 499 | Patient092C  | Patient261E  |
| 499 | Patient092D  | Patient217F  |
| 499 | Patient092D  | Patient217H  |
| 499 | Patient092D  | Patient230C  |
| 499 | Patient120B  | Patient230G  |
| 499 | Patient161B  | Patient183B  |
| 499 | Patient161B  | Patient217E  |
| 499 | Patient161B  | Patient217F  |
| 499 | Patient164   | Patient261D  |
| 499 | Patient173A  | Patient230B  |
| 499 | Patient183A  | Patient192A  |
| 499 | Patient183E  | Patient192C  |
| 499 | Patient213A  | Patient217B  |
| 499 | Patient235F  | Patient261G  |
| 500 | Patient026E  | Patient120A  |
| 500 | Patient053A2 | Patient161B  |
| 500 | Patient053C  | Patient161B  |
| 500 | Patient066E  | Patient126C  |
| 500 | Patient066F  | Patient126C  |
| 500 | Patient081C  | Patient092D  |
| 500 | Patient081C  | Patient192D  |
| 500 | Patient081D  | Patient092C  |
| 500 | Patient092A  | Patient217F  |
| 500 | Patient092B  | Patient217D  |
| 500 | Patient092C  | Patient217J  |
| 500 | Patient092C  | Patient261C  |
| 500 | Patient092D  | Patient217A  |
| 500 | Patient092E  | Patient217C  |
| 500 | Patient120C  | Patient230G  |
| 500 | Patient126A  | Patient141B  |
| 500 | Patient126A  | Patient141C  |
| 500 | Patient141F  | Patient235E  |

|     |              |             |
|-----|--------------|-------------|
| 500 | Patient141G  | Patient192A |
| 500 | Patient161B  | Patient217A |
| 500 | Patient173B  | Patient230E |
| 500 | Patient183C  | Patient192B |
| 500 | Patient213A  | Patient217E |
| 500 | Patient213A  | Patient217F |
| 500 | Patient213A  | Patient217H |
| 500 | Patient235C  | Patient261G |
| 501 | Patient026C  | Patient150A |
| 501 | Patient026C  | Patient150B |
| 501 | Patient032C  | Patient092B |
| 501 | Patient032C  | Patient120C |
| 501 | Patient053B  | Patient161B |
| 501 | Patient066F  | Patient126A |
| 501 | Patient092B  | Patient217B |
| 501 | Patient092E  | Patient217D |
| 501 | Patient145B  | Patient192F |
| 501 | Patient173B  | Patient230F |
| 501 | Patient183A  | Patient192C |
| 501 | Patient183D  | Patient192A |
| 501 | Patient192A  | Patient230C |
| 501 | Patient213A  | Patient217A |
| 501 | Patient235B  | Patient261G |
| 502 | Patient026D  | Patient126C |
| 502 | Patient032C  | Patient192B |
| 502 | Patient081C  | Patient092C |
| 502 | Patient089A1 | Patient100B |
| 502 | Patient089A2 | Patient100B |
| 502 | Patient092B  | Patient217A |
| 502 | Patient092B  | Patient217E |
| 502 | Patient092B  | Patient217F |
| 502 | Patient092B  | Patient217H |
| 502 | Patient092D  | Patient161B |
| 502 | Patient092D  | Patient261C |
| 502 | Patient092D  | Patient261E |
| 502 | Patient092E  | Patient217B |
| 502 | Patient092G  | Patient217C |
| 502 | Patient092H  | Patient217C |
| 502 | Patient092H  | Patient217D |
| 502 | Patient120D  | Patient230C |
| 502 | Patient141G  | Patient192C |
| 502 | Patient150C  | Patient258E |
| 502 | Patient173A  | Patient230E |
| 502 | Patient173B  | Patient230B |
| 502 | Patient183B  | Patient192B |
| 503 | Patient026C  | Patient150C |
| 503 | Patient032C  | Patient092A |
| 503 | Patient032C  | Patient092E |
| 503 | Patient032E  | Patient092H |
| 503 | Patient092A  | Patient230G |

|     |              |              |
|-----|--------------|--------------|
| 503 | Patient092B  | Patient230G  |
| 503 | Patient092D  | Patient217I  |
| 503 | Patient092E  | Patient217A  |
| 503 | Patient092E  | Patient217E  |
| 503 | Patient092E  | Patient217H  |
| 503 | Patient092G  | Patient217D  |
| 503 | Patient092H  | Patient217B  |
| 503 | Patient120D  | Patient141G  |
| 503 | Patient161B  | Patient183A  |
| 503 | Patient161B  | Patient183E  |
| 503 | Patient167   | Patient183C  |
| 503 | Patient192B  | Patient230G  |
| 503 | Patient192C  | Patient230C  |
| 503 | Patient235E  | Patient261G  |
| 504 | Patient032E  | Patient092G  |
| 504 | Patient092C  | Patient141G  |
| 504 | Patient092D  | Patient141G  |
| 504 | Patient092E  | Patient217F  |
| 504 | Patient092G  | Patient217A  |
| 504 | Patient092G  | Patient217B  |
| 504 | Patient126C  | Patient141C  |
| 504 | Patient133   | Patient258B  |
| 504 | Patient133   | Patient258G  |
| 504 | Patient150A  | Patient258E  |
| 504 | Patient150B  | Patient258E  |
| 504 | Patient161B  | Patient183D  |
| 504 | Patient183D  | Patient192C  |
| 505 | Patient026C  | Patient133   |
| 505 | Patient053A1 | Patient066D  |
| 505 | Patient092E  | Patient230G  |
| 505 | Patient092G  | Patient217E  |
| 505 | Patient092G  | Patient217H  |
| 505 | Patient092H  | Patient217A  |
| 505 | Patient092H  | Patient217E  |
| 505 | Patient092H  | Patient217H  |
| 505 | Patient120B  | Patient230C  |
| 505 | Patient120D  | Patient261E  |
| 505 | Patient126C  | Patient141B  |
| 505 | Patient133   | Patient258D  |
| 505 | Patient167   | Patient183B  |
| 505 | Patient192A  | Patient261E  |
| 505 | Patient213A  | Patient217I  |
| 505 | Patient233   | Patient258C1 |
| 505 | Patient233   | Patient258C2 |
| 506 | Patient045A  | Patient120A  |
| 506 | Patient053A1 | Patient121A  |
| 506 | Patient053A1 | Patient145C  |
| 506 | Patient053A2 | Patient121A  |
| 506 | Patient092A  | Patient217I  |
| 506 | Patient092C  | Patient161B  |

|     |              |              |
|-----|--------------|--------------|
| 506 | Patient092G  | Patient217F  |
| 506 | Patient092H  | Patient217F  |
| 506 | Patient120B  | Patient141G  |
| 506 | Patient120C  | Patient230C  |
| 506 | Patient120D  | Patient261C  |
| 506 | Patient126A  | Patient141A  |
| 506 | Patient133   | Patient258A1 |
| 506 | Patient141F  | Patient192A  |
| 506 | Patient161B  | Patient217I  |
| 506 | Patient183A  | Patient192B  |
| 506 | Patient183E  | Patient192B  |
| 506 | Patient192A  | Patient261C  |
| 507 | Patient026E  | Patient126A  |
| 507 | Patient045A  | Patient192D  |
| 507 | Patient045B  | Patient120A  |
| 507 | Patient045D  | Patient131   |
| 507 | Patient053C  | Patient121A  |
| 507 | Patient092A  | Patient230C  |
| 507 | Patient092B  | Patient230C  |
| 507 | Patient120B  | Patient261E  |
| 507 | Patient120C  | Patient141G  |
| 507 | Patient133   | Patient258F  |
| 508 | Patient026B  | Patient126A  |
| 508 | Patient026B  | Patient126C  |
| 508 | Patient026D  | Patient081C  |
| 508 | Patient026F  | Patient126A  |
| 508 | Patient026F  | Patient126C  |
| 508 | Patient032A  | Patient053A1 |
| 508 | Patient045B  | Patient192D  |
| 508 | Patient045C  | Patient120A  |
| 508 | Patient053A1 | Patient090   |
| 508 | Patient053B  | Patient121A  |
| 508 | Patient081D  | Patient092A  |
| 508 | Patient092A  | Patient261E  |
| 508 | Patient092C  | Patient141F  |
| 508 | Patient092E  | Patient230C  |
| 508 | Patient092H  | Patient230G  |
| 508 | Patient120C  | Patient261E  |
| 508 | Patient133   | Patient258A2 |
| 508 | Patient141F  | Patient192C  |
| 508 | Patient141G  | Patient192B  |
| 508 | Patient167   | Patient183A  |
| 508 | Patient183D  | Patient192B  |
| 508 | Patient192C  | Patient261C  |
| 508 | Patient192C  | Patient261E  |
| 509 | Patient032C  | Patient092H  |
| 509 | Patient081D  | Patient092B  |
| 509 | Patient081D  | Patient192A  |
| 509 | Patient092A  | Patient141G  |
| 509 | Patient092B  | Patient141G  |

|     |              |             |
|-----|--------------|-------------|
| 509 | Patient092B  | Patient217I |
| 509 | Patient092B  | Patient261C |
| 509 | Patient092D  | Patient141F |
| 509 | Patient092D  | Patient217J |
| 509 | Patient092G  | Patient230G |
| 509 | Patient120B  | Patient261C |
| 509 | Patient120D  | Patient141F |
| 509 | Patient126A  | Patient192D |
| 509 | Patient126C  | Patient192D |
| 509 | Patient133   | Patient206  |
| 509 | Patient133   | Patient207  |
| 509 | Patient161B  | Patient217J |
| 509 | Patient167   | Patient183E |
| 509 | Patient173A  | Patient230D |
| 510 | Patient026D  | Patient081D |
| 510 | Patient026D  | Patient235A |
| 510 | Patient032C  | Patient092G |
| 510 | Patient081A2 | Patient192D |
| 510 | Patient081B  | Patient192D |
| 510 | Patient081C  | Patient092A |
| 510 | Patient092A  | Patient261C |
| 510 | Patient092B  | Patient261E |
| 510 | Patient092E  | Patient141G |
| 510 | Patient092E  | Patient217I |
| 510 | Patient092E  | Patient261C |
| 510 | Patient093E  | Patient246A |
| 510 | Patient120C  | Patient261C |
| 510 | Patient167   | Patient183D |
| 510 | Patient173A  | Patient192D |
| 510 | Patient192B  | Patient230C |
| 511 | Patient026E  | Patient126C |
| 511 | Patient045C  | Patient192D |
| 511 | Patient053A1 | Patient224B |
| 511 | Patient081C  | Patient092B |
| 511 | Patient081C  | Patient192A |
| 511 | Patient088   | Patient100B |
| 511 | Patient092A  | Patient217J |
| 511 | Patient092C  | Patient261G |
| 511 | Patient092E  | Patient261E |
| 511 | Patient092G  | Patient217I |
| 511 | Patient092H  | Patient217I |
| 511 | Patient126C  | Patient141A |
| 511 | Patient150A  | Patient181A |
| 511 | Patient150B  | Patient181A |
| 511 | Patient150C  | Patient181A |
| 511 | Patient213A  | Patient217J |
| 512 | Patient032E  | Patient192E |
| 512 | Patient081A1 | Patient192D |
| 512 | Patient081D  | Patient092E |
| 512 | Patient081D  | Patient192C |

|     |              |              |
|-----|--------------|--------------|
| 512 | Patient092D  | Patient261G  |
| 512 | Patient094B  | Patient246A  |
| 512 | Patient120B  | Patient141F  |
| 512 | Patient173B  | Patient230D  |
| 512 | Patient192B  | Patient261E  |
| 513 | Patient032B  | Patient053A1 |
| 513 | Patient032E  | Patient192F  |
| 513 | Patient053A1 | Patient074B  |
| 513 | Patient053A1 | Patient121B  |
| 513 | Patient081D  | Patient092G  |
| 513 | Patient081F  | Patient192D  |
| 513 | Patient092B  | Patient217J  |
| 513 | Patient093A  | Patient246A  |
| 513 | Patient120C  | Patient141F  |
| 513 | Patient173B  | Patient192D  |
| 513 | Patient192A  | Patient261G  |
| 514 | Patient034A  | Patient053A1 |
| 514 | Patient053A1 | Patient133   |
| 514 | Patient081C  | Patient092E  |
| 514 | Patient081C  | Patient192C  |
| 514 | Patient092A  | Patient141F  |
| 514 | Patient092A  | Patient161B  |
| 514 | Patient092B  | Patient141F  |
| 514 | Patient092H  | Patient141G  |
| 514 | Patient092H  | Patient230C  |
| 514 | Patient092H  | Patient261E  |
| 514 | Patient141F  | Patient192B  |
| 514 | Patient183C  | Patient192E  |
| 514 | Patient192B  | Patient261C  |
| 515 | Patient026D  | Patient081A1 |
| 515 | Patient034E  | Patient053A1 |
| 515 | Patient081C  | Patient092G  |
| 515 | Patient092B  | Patient161B  |
| 515 | Patient092E  | Patient141F  |
| 515 | Patient092E  | Patient217J  |
| 515 | Patient092G  | Patient230C  |
| 515 | Patient092H  | Patient217J  |
| 515 | Patient092H  | Patient261C  |
| 515 | Patient093D  | Patient246A  |
| 515 | Patient120A  | Patient192A  |
| 515 | Patient120D  | Patient261G  |
| 515 | Patient192C  | Patient261G  |
| 516 | Patient026D  | Patient081B  |
| 516 | Patient032C  | Patient192E  |
| 516 | Patient032C  | Patient192F  |
| 516 | Patient053A1 | Patient074A  |
| 516 | Patient053A1 | Patient081A2 |
| 516 | Patient053A2 | Patient230D  |
| 516 | Patient053C  | Patient230D  |
| 516 | Patient058   | Patient189C2 |



|     |              |              |
|-----|--------------|--------------|
| 516 | Patient081D  | Patient092H  |
| 516 | Patient081E  | Patient192D  |
| 516 | Patient092E  | Patient161B  |
| 516 | Patient092G  | Patient141G  |
| 516 | Patient092G  | Patient217J  |
| 516 | Patient092G  | Patient261E  |
| 516 | Patient126A  | Patient230A  |
| 516 | Patient183B  | Patient192E  |
| 516 | Patient183C  | Patient192F  |
| 517 | Patient026D  | Patient081A2 |
| 517 | Patient026E  | Patient235A  |
| 517 | Patient034B  | Patient053A1 |
| 517 | Patient034D  | Patient053A1 |
| 517 | Patient053A1 | Patient123A  |
| 517 | Patient053A2 | Patient121B  |
| 517 | Patient081D  | Patient192B  |
| 517 | Patient092G  | Patient261C  |
| 517 | Patient120B  | Patient261G  |
| 517 | Patient192E  | Patient230G  |
| 518 | Patient053A1 | Patient081B  |
| 518 | Patient053B  | Patient230D  |
| 518 | Patient053C  | Patient121B  |
| 518 | Patient092B  | Patient261G  |
| 518 | Patient120C  | Patient261G  |
| 518 | Patient150B  | Patient217C  |
| 518 | Patient176   | Patient258B  |
| 518 | Patient183B  | Patient192F  |
| 518 | Patient192F  | Patient230G  |
| 519 | Patient026C  | Patient176   |
| 519 | Patient026D  | Patient081E  |
| 519 | Patient026E  | Patient081C  |
| 519 | Patient034C  | Patient053A1 |
| 519 | Patient053A1 | Patient066E  |
| 519 | Patient053A1 | Patient066F  |
| 519 | Patient053A1 | Patient141D  |
| 519 | Patient053A1 | Patient145A  |
| 519 | Patient053A1 | Patient224A  |
| 519 | Patient053B  | Patient121B  |
| 519 | Patient081C  | Patient092H  |
| 519 | Patient081C  | Patient192B  |
| 519 | Patient092A  | Patient261G  |
| 519 | Patient092H  | Patient161B  |
| 519 | Patient120A  | Patient192C  |
| 519 | Patient126A  | Patient230F  |
| 519 | Patient126C  | Patient230E  |
| 519 | Patient133   | Patient258E  |
| 519 | Patient150A  | Patient217C  |
| 519 | Patient176   | Patient258D  |
| 519 | Patient176   | Patient258G  |
| 519 | Patient230D  | Patient235A  |

|     |              |              |
|-----|--------------|--------------|
| 520 | Patient026A  | Patient173A  |
| 520 | Patient053A1 | Patient074C  |
| 520 | Patient053A1 | Patient123C  |
| 520 | Patient092E  | Patient261G  |
| 520 | Patient092H  | Patient141F  |
| 520 | Patient094C  | Patient246A  |
| 520 | Patient126A  | Patient230B  |
| 520 | Patient126C  | Patient230F  |
| 520 | Patient150A  | Patient217D  |
| 520 | Patient150B  | Patient217D  |
| 520 | Patient150C  | Patient181B  |
| 520 | Patient150C  | Patient217C  |
| 520 | Patient183A  | Patient192E  |
| 520 | Patient183E  | Patient192E  |
| 520 | Patient230D  | Patient235F  |
| 521 | Patient026D  | Patient081F  |
| 521 | Patient026D  | Patient173A  |
| 521 | Patient026E  | Patient081D  |
| 521 | Patient053A1 | Patient081A1 |
| 521 | Patient053A1 | Patient181A  |
| 521 | Patient081D  | Patient150A  |
| 521 | Patient081D  | Patient150B  |
| 521 | Patient092G  | Patient161B  |
| 521 | Patient100B  | Patient171   |
| 521 | Patient126C  | Patient230A  |
| 521 | Patient133   | Patient217C  |
| 521 | Patient150A  | Patient217B  |
| 521 | Patient150B  | Patient217B  |
| 521 | Patient150B  | Patient217E  |
| 521 | Patient150B  | Patient217F  |
| 521 | Patient176   | Patient258A1 |
| 521 | Patient176   | Patient258A2 |
| 521 | Patient176   | Patient258F  |
| 521 | Patient235A  | Patient258B  |
| 522 | Patient023   | Patient149A  |
| 522 | Patient053A1 | Patient123B  |
| 522 | Patient081C  | Patient150C  |
| 522 | Patient081D  | Patient150C  |
| 522 | Patient092G  | Patient141F  |
| 522 | Patient120A  | Patient192B  |
| 522 | Patient126A  | Patient230E  |
| 522 | Patient126C  | Patient224B  |
| 522 | Patient133   | Patient217D  |
| 522 | Patient141G  | Patient192E  |
| 522 | Patient150A  | Patient181B  |
| 522 | Patient150A  | Patient217E  |
| 522 | Patient150A  | Patient217F  |
| 522 | Patient150A  | Patient217H  |
| 522 | Patient150B  | Patient181B  |
| 522 | Patient150B  | Patient217H  |

|     |              |              |
|-----|--------------|--------------|
| 522 | Patient150C  | Patient217D  |
| 522 | Patient183D  | Patient192E  |
| 522 | Patient183E  | Patient192F  |
| 522 | Patient192B  | Patient261G  |
| 523 | Patient023   | Patient252A  |
| 523 | Patient053A1 | Patient081F  |
| 523 | Patient058   | Patient189C1 |
| 523 | Patient081C  | Patient150A  |
| 523 | Patient081C  | Patient150B  |
| 523 | Patient081C  | Patient235A  |
| 523 | Patient081D  | Patient235A  |
| 523 | Patient126A  | Patient224B  |
| 523 | Patient133   | Patient217B  |
| 523 | Patient150A  | Patient217A  |
| 523 | Patient150B  | Patient217A  |
| 523 | Patient150C  | Patient217B  |
| 523 | Patient150C  | Patient217E  |
| 523 | Patient150C  | Patient217F  |
| 523 | Patient183A  | Patient192F  |
| 523 | Patient235A  | Patient258G  |
| 524 | Patient026A  | Patient173B  |
| 524 | Patient053A1 | Patient081E  |
| 524 | Patient053A1 | Patient217C  |
| 524 | Patient053A1 | Patient230A  |
| 524 | Patient133   | Patient217A  |
| 524 | Patient133   | Patient217E  |
| 524 | Patient133   | Patient217F  |
| 524 | Patient133   | Patient217H  |
| 524 | Patient141G  | Patient192F  |
| 524 | Patient150C  | Patient217H  |
| 524 | Patient179   | Patient193   |
| 524 | Patient192E  | Patient230C  |
| 524 | Patient230D  | Patient235E  |
| 525 | Patient026A  | Patient081C  |
| 525 | Patient026A  | Patient081D  |
| 525 | Patient026D  | Patient173B  |
| 525 | Patient053A1 | Patient103C  |
| 525 | Patient053A1 | Patient217D  |
| 525 | Patient053A2 | Patient123A  |
| 525 | Patient090   | Patient192D  |
| 525 | Patient092H  | Patient261G  |
| 525 | Patient103D  | Patient150A  |
| 525 | Patient103D  | Patient150B  |
| 525 | Patient103D  | Patient150C  |
| 525 | Patient126C  | Patient230B  |
| 525 | Patient150C  | Patient217A  |
| 525 | Patient158   | Patient246A  |
| 525 | Patient183D  | Patient192F  |
| 525 | Patient192F  | Patient230C  |
| 525 | Patient235A  | Patient258A1 |

|     |              |              |
|-----|--------------|--------------|
| 525 | Patient235A  | Patient258A2 |
| 525 | Patient235A  | Patient258D  |
| 525 | Patient235A  | Patient258F  |
| 526 | Patient023   | Patient252B  |
| 526 | Patient026E  | Patient081A1 |
| 526 | Patient053A1 | Patient074D  |
| 526 | Patient053A1 | Patient217B  |
| 526 | Patient053A1 | Patient217H  |
| 526 | Patient053C  | Patient123A  |
| 526 | Patient066D  | Patient192D  |
| 526 | Patient081B  | Patient150A  |
| 526 | Patient192E  | Patient261E  |
| 527 | Patient026E  | Patient081B  |
| 527 | Patient026E  | Patient173A  |
| 527 | Patient038   | Patient066A  |
| 527 | Patient053A1 | Patient123D  |
| 527 | Patient053A1 | Patient126A  |
| 527 | Patient053A1 | Patient176   |
| 527 | Patient053A1 | Patient181B  |
| 527 | Patient053A1 | Patient217E  |
| 527 | Patient053A1 | Patient217F  |
| 527 | Patient053A2 | Patient123C  |
| 527 | Patient053B  | Patient123A  |
| 527 | Patient081B  | Patient150B  |
| 527 | Patient092G  | Patient261G  |
| 528 | Patient026E  | Patient081A2 |
| 528 | Patient053A1 | Patient103A  |
| 528 | Patient053A1 | Patient141B  |
| 528 | Patient053A1 | Patient217A  |
| 528 | Patient053C  | Patient123C  |
| 528 | Patient092A  | Patient121A  |
| 528 | Patient141F  | Patient192E  |
| 528 | Patient176   | Patient207   |
| 528 | Patient192E  | Patient261C  |
| 528 | Patient192F  | Patient261C  |
| 529 | Patient023   | Patient252F  |
| 529 | Patient026B  | Patient081C  |
| 529 | Patient026B  | Patient081D  |
| 529 | Patient026E  | Patient081E  |
| 529 | Patient026F  | Patient081C  |
| 529 | Patient026F  | Patient081D  |
| 529 | Patient053A1 | Patient126C  |
| 529 | Patient053A1 | Patient141C  |
| 529 | Patient053A1 | Patient230B  |
| 529 | Patient053A2 | Patient123B  |
| 529 | Patient053B  | Patient123C  |
| 529 | Patient081D  | Patient192E  |
| 529 | Patient092E  | Patient121A  |
| 529 | Patient093A  | Patient246C  |
| 529 | Patient114   | Patient179   |

|     |              |              |
|-----|--------------|--------------|
| 529 | Patient133   | Patient217I  |
| 529 | Patient141F  | Patient192F  |
| 529 | Patient161B  | Patient192A  |
| 529 | Patient192F  | Patient261E  |
| 530 | Patient026A  | Patient081B  |
| 530 | Patient053A1 | Patient230F  |
| 530 | Patient053C  | Patient123B  |
| 530 | Patient081A1 | Patient150A  |
| 530 | Patient081A1 | Patient150C  |
| 530 | Patient081A2 | Patient150A  |
| 530 | Patient081B  | Patient150C  |
| 530 | Patient090   | Patient258B  |
| 530 | Patient090   | Patient258D  |
| 530 | Patient150A  | Patient217I  |
| 530 | Patient150B  | Patient217I  |
| 530 | Patient181A  | Patient192D  |
| 531 | Patient026A  | Patient081A1 |
| 531 | Patient026A  | Patient081A2 |
| 531 | Patient026E  | Patient081F  |
| 531 | Patient026E  | Patient173B  |
| 531 | Patient053A1 | Patient103B  |
| 531 | Patient053A1 | Patient141A  |
| 531 | Patient053B  | Patient123B  |
| 531 | Patient066E  | Patient192D  |
| 531 | Patient081A1 | Patient150B  |
| 531 | Patient081A2 | Patient150B  |
| 531 | Patient081C  | Patient192E  |
| 531 | Patient081F  | Patient150C  |
| 531 | Patient090   | Patient258G  |
| 531 | Patient093D  | Patient246C  |
| 531 | Patient093E  | Patient246C  |
| 531 | Patient094B  | Patient246C  |
| 531 | Patient133   | Patient192D  |
| 531 | Patient161B  | Patient192C  |
| 532 | Patient053A1 | Patient074E  |
| 532 | Patient053A1 | Patient230E  |
| 532 | Patient081A2 | Patient150C  |
| 532 | Patient081D  | Patient192F  |
| 532 | Patient081F  | Patient150A  |
| 532 | Patient081F  | Patient150B  |
| 532 | Patient094A  | Patient158   |
| 532 | Patient103D  | Patient183C  |
| 532 | Patient103E  | Patient150A  |
| 532 | Patient150C  | Patient217I  |
| 533 | Patient023   | Patient097D  |
| 533 | Patient026B  | Patient081B  |
| 533 | Patient066F  | Patient192D  |
| 533 | Patient074B  | Patient126C  |
| 533 | Patient090   | Patient258A1 |
| 533 | Patient090   | Patient258A2 |

|     |              |              |
|-----|--------------|--------------|
| 533 | Patient090   | Patient258F  |
| 533 | Patient093D  | Patient158   |
| 533 | Patient103E  | Patient150B  |
| 533 | Patient103E  | Patient150C  |
| 533 | Patient126A  | Patient230D  |
| 533 | Patient150B  | Patient217J  |
| 533 | Patient176   | Patient258E  |
| 534 | Patient026F  | Patient081B  |
| 534 | Patient026F  | Patient173A  |
| 534 | Patient053A1 | Patient164   |
| 534 | Patient053A2 | Patient123D  |
| 534 | Patient074A  | Patient126C  |
| 534 | Patient074B  | Patient126A  |
| 534 | Patient081C  | Patient192F  |
| 534 | Patient081E  | Patient150A  |
| 534 | Patient081E  | Patient150C  |
| 534 | Patient092C  | Patient121B  |
| 534 | Patient092C  | Patient145C  |
| 534 | Patient092D  | Patient145C  |
| 534 | Patient093E  | Patient158   |
| 534 | Patient150A  | Patient217J  |
| 534 | Patient171   | Patient189C2 |
| 535 | Patient023   | Patient097B  |
| 535 | Patient026A  | Patient081F  |
| 535 | Patient026B  | Patient081A2 |
| 535 | Patient026C  | Patient053A1 |
| 535 | Patient026D  | Patient235C  |
| 535 | Patient026F  | Patient081A2 |
| 535 | Patient053A1 | Patient217I  |
| 535 | Patient053C  | Patient123D  |
| 535 | Patient081E  | Patient150B  |
| 535 | Patient093A  | Patient246B  |
| 535 | Patient093A  | Patient246E  |
| 535 | Patient093E  | Patient246B  |
| 535 | Patient103D  | Patient183B  |
| 535 | Patient133   | Patient217J  |
| 535 | Patient150C  | Patient217J  |
| 535 | Patient161B  | Patient192B  |
| 536 | Patient022B  | Patient145C  |
| 536 | Patient026A  | Patient081E  |
| 536 | Patient026B  | Patient081A1 |
| 536 | Patient026B  | Patient173A  |
| 536 | Patient026D  | Patient235B  |
| 536 | Patient026F  | Patient081A1 |
| 536 | Patient053B  | Patient123D  |
| 536 | Patient074A  | Patient126A  |
| 536 | Patient092C  | Patient120D  |
| 536 | Patient093A  | Patient158   |
| 536 | Patient094C  | Patient246C  |
| 536 | Patient120A  | Patient192E  |

|     |              |              |
|-----|--------------|--------------|
| 536 | Patient126C  | Patient230D  |
| 536 | Patient192E  | Patient261G  |
| 537 | Patient022B  | Patient145B  |
| 537 | Patient026B  | Patient081F  |
| 537 | Patient026F  | Patient081F  |
| 537 | Patient090   | Patient251   |
| 537 | Patient092C  | Patient121A  |
| 537 | Patient092C  | Patient230D  |
| 537 | Patient093E  | Patient246E  |
| 537 | Patient176   | Patient217C  |
| 537 | Patient176   | Patient217D  |
| 537 | Patient192F  | Patient261G  |
| 538 | Patient026F  | Patient053A1 |
| 538 | Patient026F  | Patient173B  |
| 538 | Patient029   | Patient179   |
| 538 | Patient074C  | Patient126C  |
| 538 | Patient094B  | Patient158   |
| 538 | Patient103E  | Patient183C  |
| 538 | Patient120A  | Patient192F  |
| 538 | Patient176   | Patient217B  |
| 538 | Patient176   | Patient217F  |
| 538 | Patient181B  | Patient192D  |
| 539 | Patient053A1 | Patient217J  |
| 539 | Patient081B  | Patient092D  |
| 539 | Patient092A  | Patient120D  |
| 539 | Patient092A  | Patient121B  |
| 539 | Patient093D  | Patient246E  |
| 539 | Patient094B  | Patient246E  |
| 539 | Patient103D  | Patient183A  |
| 539 | Patient103D  | Patient183E  |
| 539 | Patient103E  | Patient183B  |
| 539 | Patient173A  | Patient261A  |
| 539 | Patient173A  | Patient261B  |
| 539 | Patient176   | Patient217A  |
| 539 | Patient176   | Patient217E  |
| 539 | Patient176   | Patient217H  |
| 539 | Patient180   | Patient193   |
| 539 | Patient222D  | Patient246A  |
| 540 | Patient023   | Patient097A  |
| 540 | Patient026B  | Patient081E  |
| 540 | Patient026B  | Patient173B  |
| 540 | Patient026F  | Patient081E  |
| 540 | Patient053A1 | Patient173A  |
| 540 | Patient074C  | Patient126A  |
| 540 | Patient092C  | Patient120B  |
| 540 | Patient092D  | Patient230D  |
| 540 | Patient092E  | Patient121B  |
| 540 | Patient094B  | Patient246B  |
| 540 | Patient123A  | Patient261B  |
| 541 | Patient026B  | Patient053A1 |

|     |              |              |
|-----|--------------|--------------|
| 541 | Patient045A  | Patient103D  |
| 541 | Patient081A2 | Patient092D  |
| 541 | Patient081B  | Patient092C  |
| 541 | Patient092B  | Patient120D  |
| 541 | Patient092B  | Patient121B  |
| 541 | Patient092C  | Patient120C  |
| 541 | Patient092D  | Patient120D  |
| 541 | Patient092E  | Patient120D  |
| 541 | Patient093D  | Patient246B  |
| 541 | Patient094C  | Patient246E  |
| 541 | Patient103D  | Patient183D  |
| 541 | Patient171   | Patient189C1 |
| 541 | Patient192A  | Patient230D  |
| 541 | Patient192D  | Patient224B  |
| 541 | Patient192D  | Patient235A  |
| 542 | Patient026A  | Patient053A1 |
| 542 | Patient026D  | Patient161B  |
| 542 | Patient026F  | Patient053A2 |
| 542 | Patient045B  | Patient103D  |
| 542 | Patient045C  | Patient103D  |
| 542 | Patient094C  | Patient158   |
| 542 | Patient094C  | Patient246B  |
| 542 | Patient173B  | Patient261A  |
| 542 | Patient173B  | Patient261B  |
| 542 | Patient192C  | Patient230D  |
| 542 | Patient196D  | Patient246A  |
| 542 | Patient222D  | Patient246C  |
| 543 | Patient022B  | Patient066D  |
| 543 | Patient023   | Patient131   |
| 543 | Patient026B  | Patient053A2 |
| 543 | Patient026E  | Patient235C  |
| 543 | Patient026F  | Patient053C  |
| 543 | Patient032D  | Patient092D  |
| 543 | Patient081A1 | Patient092D  |
| 543 | Patient081A2 | Patient092C  |
| 543 | Patient103D  | Patient133   |
| 543 | Patient103E  | Patient183A  |
| 543 | Patient103E  | Patient183E  |
| 543 | Patient123A  | Patient261A  |
| 544 | Patient023   | Patient097C  |
| 544 | Patient023   | Patient097E  |
| 544 | Patient026B  | Patient053C  |
| 544 | Patient026E  | Patient235B  |
| 544 | Patient026F  | Patient053B  |
| 544 | Patient053A1 | Patient173B  |
| 544 | Patient066D  | Patient092C  |
| 544 | Patient074B  | Patient173A  |
| 544 | Patient074B  | Patient173B  |
| 544 | Patient090   | Patient258E  |
| 544 | Patient092A  | Patient145C  |



|     |              |              |
|-----|--------------|--------------|
| 544 | Patient092D  | Patient121B  |
| 544 | Patient092H  | Patient120D  |
| 544 | Patient092H  | Patient121B  |
| 544 | Patient093E  | Patient246D  |
| 544 | Patient123C  | Patient261B  |
| 544 | Patient173A  | Patient261D  |
| 544 | Patient176   | Patient217I  |
| 545 | Patient022B  | Patient032A  |
| 545 | Patient026A  | Patient053A2 |
| 545 | Patient026A  | Patient161B  |
| 545 | Patient026B  | Patient053B  |
| 545 | Patient045A  | Patient103E  |
| 545 | Patient066D  | Patient092D  |
| 545 | Patient074A  | Patient173A  |
| 545 | Patient081A1 | Patient092C  |
| 545 | Patient092A  | Patient120B  |
| 545 | Patient092B  | Patient121A  |
| 545 | Patient092B  | Patient145C  |
| 545 | Patient103D  | Patient177   |
| 545 | Patient103E  | Patient183D  |
| 545 | Patient114   | Patient180   |
| 545 | Patient121A  | Patient133   |
| 545 | Patient123B  | Patient261B  |
| 546 | Patient026A  | Patient053C  |
| 546 | Patient032D  | Patient092C  |
| 546 | Patient045B  | Patient103E  |
| 546 | Patient074D  | Patient126A  |
| 546 | Patient074D  | Patient126C  |
| 546 | Patient081F  | Patient092D  |
| 546 | Patient092B  | Patient230D  |
| 546 | Patient092C  | Patient126C  |
| 546 | Patient092D  | Patient120B  |
| 546 | Patient092D  | Patient121A  |
| 546 | Patient092E  | Patient120B  |
| 546 | Patient092G  | Patient121B  |
| 546 | Patient094B  | Patient246D  |
| 546 | Patient120A  | Patient161B  |
| 546 | Patient123B  | Patient261A  |
| 546 | Patient123C  | Patient261A  |
| 546 | Patient176   | Patient192D  |
| 547 | Patient026A  | Patient053B  |
| 547 | Patient053A1 | Patient258E  |
| 547 | Patient074A  | Patient173B  |
| 547 | Patient081E  | Patient092D  |
| 547 | Patient092A  | Patient120C  |
| 547 | Patient092A  | Patient230D  |
| 547 | Patient092C  | Patient126A  |
| 547 | Patient092C  | Patient145A  |
| 547 | Patient092D  | Patient120C  |
| 547 | Patient092D  | Patient145A  |

|     |              |              |
|-----|--------------|--------------|
| 547 | Patient092E  | Patient120C  |
| 547 | Patient092E  | Patient145C  |
| 547 | Patient092E  | Patient230D  |
| 547 | Patient092G  | Patient120D  |
| 547 | Patient123D  | Patient261B  |
| 547 | Patient149A  | Patient158   |
| 547 | Patient158   | Patient247C  |
| 548 | Patient022B  | Patient066E  |
| 548 | Patient045C  | Patient103E  |
| 548 | Patient081B  | Patient092A  |
| 548 | Patient081F  | Patient092C  |
| 548 | Patient092B  | Patient120B  |
| 548 | Patient092H  | Patient121A  |
| 548 | Patient093A  | Patient246D  |
| 548 | Patient103E  | Patient133   |
| 548 | Patient123A  | Patient261D  |
| 548 | Patient158   | Patient247B  |
| 548 | Patient167   | Patient207   |
| 548 | Patient173B  | Patient261D  |
| 548 | Patient210   | Patient222C  |
| 549 | Patient022B  | Patient032E  |
| 549 | Patient022B  | Patient081A1 |
| 549 | Patient022B  | Patient081A2 |
| 549 | Patient022B  | Patient081B  |
| 549 | Patient066D  | Patient150B  |
| 549 | Patient066D  | Patient150C  |
| 549 | Patient066E  | Patient092C  |
| 549 | Patient074C  | Patient173A  |
| 549 | Patient081B  | Patient092B  |
| 549 | Patient081E  | Patient092C  |
| 549 | Patient092D  | Patient126A  |
| 549 | Patient092D  | Patient126C  |
| 549 | Patient092H  | Patient230D  |
| 549 | Patient093D  | Patient246D  |
| 549 | Patient103E  | Patient177   |
| 549 | Patient158   | Patient247A  |
| 549 | Patient167   | Patient206   |
| 549 | Patient171   | Patient238   |
| 549 | Patient222D  | Patient246E  |
| 550 | Patient022B  | Patient032B  |
| 550 | Patient022B  | Patient034A  |
| 550 | Patient022B  | Patient081C  |
| 550 | Patient022B  | Patient081D  |
| 550 | Patient032A  | Patient092C  |
| 550 | Patient032D  | Patient206   |
| 550 | Patient032D  | Patient207   |
| 550 | Patient066D  | Patient150A  |
| 550 | Patient066F  | Patient092C  |
| 550 | Patient081A2 | Patient092A  |
| 550 | Patient081D  | Patient120A  |

|     |              |             |
|-----|--------------|-------------|
| 550 | Patient090   | Patient217C |
| 550 | Patient092B  | Patient120C |
| 550 | Patient092G  | Patient121A |
| 550 | Patient092H  | Patient120B |
| 550 | Patient092H  | Patient145C |
| 550 | Patient123D  | Patient261A |
| 550 | Patient133   | Patient235A |
| 550 | Patient141B  | Patient192D |
| 550 | Patient161B  | Patient192E |
| 550 | Patient161B  | Patient235B |
| 550 | Patient161B  | Patient235C |
| 550 | Patient192B  | Patient230D |
| 551 | Patient022B  | Patient034D |
| 551 | Patient022B  | Patient034E |
| 551 | Patient022B  | Patient066F |
| 551 | Patient022B  | Patient145A |
| 551 | Patient028   | Patient210  |
| 551 | Patient032D  | Patient092E |
| 551 | Patient066E  | Patient092D |
| 551 | Patient066F  | Patient092D |
| 551 | Patient074C  | Patient173B |
| 551 | Patient074E  | Patient126A |
| 551 | Patient079C  | Patient158  |
| 551 | Patient081A2 | Patient092B |
| 551 | Patient090   | Patient217A |
| 551 | Patient090   | Patient217D |
| 551 | Patient123B  | Patient261D |
| 551 | Patient123C  | Patient261D |
| 551 | Patient141C  | Patient192D |
| 551 | Patient161B  | Patient192F |
| 551 | Patient176   | Patient217J |
| 551 | Patient222D  | Patient246B |
| 552 | Patient022B  | Patient034B |
| 552 | Patient022B  | Patient081E |
| 552 | Patient022B  | Patient081F |
| 552 | Patient026E  | Patient161B |
| 552 | Patient032A  | Patient092D |
| 552 | Patient032D  | Patient092A |
| 552 | Patient032D  | Patient092B |
| 552 | Patient074E  | Patient126C |
| 552 | Patient079A1 | Patient158  |
| 552 | Patient081C  | Patient120A |
| 552 | Patient090   | Patient217B |
| 552 | Patient090   | Patient217H |
| 552 | Patient092G  | Patient145C |
| 552 | Patient092H  | Patient120C |
| 552 | Patient210   | Patient263A |
| 553 | Patient022B  | Patient141D |
| 553 | Patient066D  | Patient092A |
| 553 | Patient079A2 | Patient158  |

|     |              |              |
|-----|--------------|--------------|
| 553 | Patient079B  | Patient158   |
| 553 | Patient081A2 | Patient092E  |
| 553 | Patient081B  | Patient092E  |
| 553 | Patient081B  | Patient092G  |
| 553 | Patient090   | Patient217E  |
| 553 | Patient090   | Patient217F  |
| 553 | Patient092A  | Patient126A  |
| 553 | Patient092G  | Patient120B  |
| 553 | Patient092G  | Patient230D  |
| 553 | Patient094C  | Patient246D  |
| 553 | Patient164   | Patient206   |
| 553 | Patient164   | Patient207   |
| 553 | Patient176   | Patient224B  |
| 553 | Patient192D  | Patient258B  |
| 553 | Patient213A  | Patient224B  |
| 553 | Patient235C  | Patient258B  |
| 554 | Patient066F  | Patient150B  |
| 554 | Patient081A1 | Patient092A  |
| 554 | Patient081F  | Patient092B  |
| 554 | Patient092A  | Patient126C  |
| 554 | Patient092C  | Patient224A  |
| 554 | Patient092C  | Patient224B  |
| 554 | Patient092D  | Patient224B  |
| 554 | Patient092E  | Patient235F  |
| 554 | Patient141A  | Patient192D  |
| 554 | Patient176   | Patient224A  |
| 554 | Patient189C1 | Patient238   |
| 554 | Patient189C2 | Patient238   |
| 554 | Patient192D  | Patient258G  |
| 554 | Patient196F  | Patient210   |
| 554 | Patient235B  | Patient258B  |
| 555 | Patient022B  | Patient032C  |
| 555 | Patient032B  | Patient092C  |
| 555 | Patient066D  | Patient092B  |
| 555 | Patient066D  | Patient092E  |
| 555 | Patient066E  | Patient150B  |
| 555 | Patient066E  | Patient150C  |
| 555 | Patient066F  | Patient150A  |
| 555 | Patient074D  | Patient173A  |
| 555 | Patient081A1 | Patient092B  |
| 555 | Patient081A2 | Patient092G  |
| 555 | Patient092B  | Patient126A  |
| 555 | Patient092B  | Patient126C  |
| 555 | Patient092B  | Patient235F  |
| 555 | Patient092D  | Patient224A  |
| 555 | Patient092E  | Patient126A  |
| 555 | Patient092G  | Patient120C  |
| 555 | Patient123D  | Patient261D  |
| 555 | Patient192D  | Patient258A1 |
| 555 | Patient192D  | Patient258D  |

|     |              |              |
|-----|--------------|--------------|
| 555 | Patient235C  | Patient258G  |
| 556 | Patient022B  | Patient034C  |
| 556 | Patient022B  | Patient141C  |
| 556 | Patient045A  | Patient235A  |
| 556 | Patient066E  | Patient150A  |
| 556 | Patient081A1 | Patient092E  |
| 556 | Patient081B  | Patient092H  |
| 556 | Patient081E  | Patient092B  |
| 556 | Patient081F  | Patient092A  |
| 556 | Patient092A  | Patient235F  |
| 556 | Patient092E  | Patient126C  |
| 556 | Patient192D  | Patient258A2 |
| 556 | Patient192D  | Patient258F  |
| 556 | Patient222D  | Patient246D  |
| 556 | Patient235B  | Patient258G  |
| 557 | Patient032B  | Patient092D  |
| 557 | Patient034A  | Patient092C  |
| 557 | Patient045B  | Patient235A  |
| 557 | Patient074D  | Patient173B  |
| 557 | Patient081E  | Patient092A  |
| 557 | Patient092A  | Patient145A  |
| 557 | Patient092C  | Patient235F  |
| 557 | Patient173B  | Patient195   |
| 557 | Patient235C  | Patient258A1 |
| 557 | Patient235C  | Patient258A2 |
| 557 | Patient235C  | Patient258D  |
| 557 | Patient235C  | Patient258F  |
| 558 | Patient022B  | Patient230G  |
| 558 | Patient032D  | Patient092H  |
| 558 | Patient066F  | Patient150C  |
| 558 | Patient081A1 | Patient092G  |
| 558 | Patient081A2 | Patient092H  |
| 558 | Patient081E  | Patient092E  |
| 558 | Patient090   | Patient217I  |
| 558 | Patient092B  | Patient145A  |
| 558 | Patient092D  | Patient235F  |
| 558 | Patient092E  | Patient235E  |
| 558 | Patient121B  | Patient133   |
| 558 | Patient126C  | Patient213A  |
| 558 | Patient158   | Patient236B  |
| 558 | Patient161B  | Patient213A  |
| 558 | Patient235B  | Patient258A1 |
| 558 | Patient235B  | Patient258A2 |
| 558 | Patient235B  | Patient258D  |
| 558 | Patient235B  | Patient258F  |
| 559 | Patient034A  | Patient092D  |
| 559 | Patient034B  | Patient092C  |
| 559 | Patient034D  | Patient092C  |
| 559 | Patient066D  | Patient092H  |
| 559 | Patient066E  | Patient092A  |

|     |              |              |
|-----|--------------|--------------|
| 559 | Patient066F  | Patient092A  |
| 559 | Patient074B  | Patient092C  |
| 559 | Patient081F  | Patient092E  |
| 559 | Patient092A  | Patient235E  |
| 559 | Patient092B  | Patient235E  |
| 559 | Patient092G  | Patient126A  |
| 559 | Patient092H  | Patient126A  |
| 559 | Patient097A  | Patient158   |
| 559 | Patient108B1 | Patient158   |
| 559 | Patient121A  | Patient145C  |
| 559 | Patient206   | Patient258B  |
| 559 | Patient207   | Patient258B  |
| 560 | Patient022B  | Patient141B  |
| 560 | Patient022B  | Patient230C  |
| 560 | Patient026C  | Patient053C  |
| 560 | Patient026C  | Patient090   |
| 560 | Patient032A  | Patient092B  |
| 560 | Patient032A  | Patient092E  |
| 560 | Patient034E  | Patient092C  |
| 560 | Patient045C  | Patient235A  |
| 560 | Patient066F  | Patient092B  |
| 560 | Patient092C  | Patient141D  |
| 560 | Patient092C  | Patient173A  |
| 560 | Patient092D  | Patient141D  |
| 560 | Patient092E  | Patient145A  |
| 560 | Patient092G  | Patient126C  |
| 560 | Patient092H  | Patient126C  |
| 560 | Patient108B2 | Patient158   |
| 560 | Patient120D  | Patient230D  |
| 560 | Patient121A  | Patient176   |
| 560 | Patient192D  | Patient230A  |
| 560 | Patient196D  | Patient246C  |
| 560 | Patient206   | Patient258A1 |
| 560 | Patient206   | Patient258D  |
| 560 | Patient206   | Patient258G  |
| 560 | Patient207   | Patient258A1 |
| 560 | Patient207   | Patient258D  |
| 560 | Patient207   | Patient258G  |
| 561 | Patient022B  | Patient261A  |
| 561 | Patient026C  | Patient053A2 |
| 561 | Patient032A  | Patient092A  |
| 561 | Patient034C  | Patient092C  |
| 561 | Patient045D  | Patient210   |
| 561 | Patient066E  | Patient092B  |
| 561 | Patient066E  | Patient092E  |
| 561 | Patient066F  | Patient092E  |
| 561 | Patient074E  | Patient173A  |
| 561 | Patient081A1 | Patient092H  |
| 561 | Patient081F  | Patient092G  |
| 561 | Patient092D  | Patient173A  |

|     |             |              |
|-----|-------------|--------------|
| 561 | Patient092E | Patient235B  |
| 562 | Patient022B | Patient141G  |
| 562 | Patient022B | Patient261C  |
| 562 | Patient022B | Patient261E  |
| 562 | Patient032D | Patient092G  |
| 562 | Patient034B | Patient092D  |
| 562 | Patient034D | Patient092D  |
| 562 | Patient034E | Patient092D  |
| 562 | Patient066D | Patient092G  |
| 562 | Patient074A | Patient092C  |
| 562 | Patient074B | Patient092D  |
| 562 | Patient074B | Patient176   |
| 562 | Patient074E | Patient173B  |
| 562 | Patient081E | Patient092G  |
| 562 | Patient090  | Patient133   |
| 562 | Patient090  | Patient173A  |
| 562 | Patient092A | Patient224B  |
| 562 | Patient092A | Patient235B  |
| 562 | Patient092B | Patient235B  |
| 562 | Patient092C | Patient103C  |
| 562 | Patient092C | Patient235E  |
| 562 | Patient092D | Patient103C  |
| 562 | Patient092D | Patient235E  |
| 562 | Patient092E | Patient235C  |
| 562 | Patient092H | Patient145A  |
| 562 | Patient092H | Patient235F  |
| 562 | Patient093B | Patient158   |
| 562 | Patient097C | Patient158   |
| 562 | Patient108A | Patient158   |
| 562 | Patient192D | Patient230B  |
| 562 | Patient192D | Patient230F  |
| 562 | Patient206  | Patient258A2 |
| 562 | Patient206  | Patient258F  |
| 562 | Patient207  | Patient258A2 |
| 562 | Patient207  | Patient258F  |
| 563 | Patient022B | Patient141A  |
| 563 | Patient022B | Patient261B  |
| 563 | Patient026B | Patient161B  |
| 563 | Patient026C | Patient053B  |
| 563 | Patient034C | Patient092D  |
| 563 | Patient074A | Patient176   |
| 563 | Patient092A | Patient173A  |
| 563 | Patient092A | Patient224A  |
| 563 | Patient092A | Patient235C  |
| 563 | Patient092B | Patient235C  |
| 563 | Patient092C | Patient181A  |
| 563 | Patient092G | Patient145A  |
| 563 | Patient092G | Patient235F  |
| 563 | Patient093C | Patient158   |
| 563 | Patient097E | Patient158   |

|     |             |              |
|-----|-------------|--------------|
| 563 | Patient103C | Patient176   |
| 563 | Patient103D | Patient164   |
| 563 | Patient120B | Patient230D  |
| 563 | Patient126A | Patient213A  |
| 563 | Patient126C | Patient195   |
| 563 | Patient192D | Patient230E  |
| 564 | Patient026F | Patient121A  |
| 564 | Patient026F | Patient161B  |
| 564 | Patient058  | Patient069   |
| 564 | Patient066D | Patient213A  |
| 564 | Patient081F | Patient092H  |
| 564 | Patient092B | Patient224B  |
| 564 | Patient092C | Patient235B  |
| 564 | Patient092E | Patient224B  |
| 564 | Patient108D | Patient158   |
| 564 | Patient120C | Patient230D  |
| 564 | Patient126A | Patient261B  |
| 564 | Patient158  | Patient236A  |
| 564 | Patient179  | Patient189C2 |
| 564 | Patient192D | Patient217C  |
| 564 | Patient192E | Patient230D  |
| 565 | Patient022B | Patient141F  |
| 565 | Patient026B | Patient121A  |
| 565 | Patient066E | Patient092H  |
| 565 | Patient066F | Patient092H  |
| 565 | Patient074A | Patient092D  |
| 565 | Patient081E | Patient092H  |
| 565 | Patient090  | Patient217J  |
| 565 | Patient092B | Patient224A  |
| 565 | Patient092C | Patient173B  |
| 565 | Patient092D | Patient235B  |
| 565 | Patient092E | Patient173A  |
| 565 | Patient092E | Patient224A  |
| 565 | Patient109B | Patient158   |
| 565 | Patient157  | Patient158   |
| 565 | Patient176  | Patient251   |
| 565 | Patient192D | Patient217D  |
| 565 | Patient192F | Patient230D  |
| 566 | Patient032A | Patient092H  |
| 566 | Patient032B | Patient092A  |
| 566 | Patient032B | Patient092B  |
| 566 | Patient032B | Patient092E  |
| 566 | Patient074C | Patient092C  |
| 566 | Patient090  | Patient173B  |
| 566 | Patient092A | Patient141D  |
| 566 | Patient092B | Patient173A  |
| 566 | Patient092C | Patient235C  |
| 566 | Patient092D | Patient181A  |
| 566 | Patient092H | Patient235E  |
| 566 | Patient103D | Patient213A  |



|     |             |             |
|-----|-------------|-------------|
| 566 | Patient126A | Patient261A |
| 566 | Patient141C | Patient150B |
| 566 | Patient141C | Patient150C |
| 566 | Patient158  | Patient247E |
| 566 | Patient192D | Patient217B |
| 567 | Patient022B | Patient230A |
| 567 | Patient032A | Patient092G |
| 567 | Patient034A | Patient092E |
| 567 | Patient066E | Patient092G |
| 567 | Patient066F | Patient092G |
| 567 | Patient092B | Patient141D |
| 567 | Patient092D | Patient103B |
| 567 | Patient092D | Patient173B |
| 567 | Patient092G | Patient235E |
| 567 | Patient103E | Patient164  |
| 567 | Patient109A | Patient158  |
| 567 | Patient126C | Patient261A |
| 567 | Patient126C | Patient261B |
| 567 | Patient141B | Patient150A |
| 567 | Patient141B | Patient150B |
| 567 | Patient141B | Patient150C |
| 567 | Patient141B | Patient213A |
| 567 | Patient141C | Patient150A |
| 567 | Patient141C | Patient213A |
| 567 | Patient158  | Patient222A |
| 567 | Patient158  | Patient247D |
| 567 | Patient192D | Patient217E |
| 567 | Patient192D | Patient217H |
| 568 | Patient022B | Patient230F |
| 568 | Patient026A | Patient121A |
| 568 | Patient034A | Patient092A |
| 568 | Patient034A | Patient092B |
| 568 | Patient058  | Patient238  |
| 568 | Patient074B | Patient092A |
| 568 | Patient074C | Patient176  |
| 568 | Patient092C | Patient103B |
| 568 | Patient092D | Patient235C |
| 568 | Patient092H | Patient224B |
| 568 | Patient158  | Patient184  |
| 568 | Patient158  | Patient213B |
| 568 | Patient158  | Patient222B |
| 568 | Patient192D | Patient217A |
| 568 | Patient192D | Patient217F |
| 568 | Patient192D | Patient261B |
| 568 | Patient196D | Patient246B |
| 569 | Patient022B | Patient230D |
| 569 | Patient022B | Patient261D |
| 569 | Patient034B | Patient092A |
| 569 | Patient034B | Patient092B |
| 569 | Patient034B | Patient092E |

|     |              |              |
|-----|--------------|--------------|
| 569 | Patient034D  | Patient092B  |
| 569 | Patient053A2 | Patient217C  |
| 569 | Patient074C  | Patient092D  |
| 569 | Patient090   | Patient121A  |
| 569 | Patient090   | Patient164   |
| 569 | Patient092D  | Patient141C  |
| 569 | Patient092H  | Patient224A  |
| 569 | Patient092H  | Patient235B  |
| 569 | Patient097D  | Patient158   |
| 569 | Patient108G  | Patient158   |
| 569 | Patient108H  | Patient158   |
| 569 | Patient123A  | Patient133   |
| 569 | Patient158   | Patient265   |
| 569 | Patient179   | Patient189C1 |
| 569 | Patient192D  | Patient261A  |
| 569 | Patient196D  | Patient246E  |
| 570 | Patient022B  | Patient261G  |
| 570 | Patient034D  | Patient092A  |
| 570 | Patient034D  | Patient092E  |
| 570 | Patient034E  | Patient092A  |
| 570 | Patient034E  | Patient092B  |
| 570 | Patient034E  | Patient092E  |
| 570 | Patient053A1 | Patient192D  |
| 570 | Patient053A2 | Patient217D  |
| 570 | Patient053C  | Patient217C  |
| 570 | Patient074B  | Patient092E  |
| 570 | Patient090   | Patient235A  |
| 570 | Patient092A  | Patient173B  |
| 570 | Patient092C  | Patient141B  |
| 570 | Patient092C  | Patient141C  |
| 570 | Patient092D  | Patient141B  |
| 570 | Patient092E  | Patient141D  |
| 570 | Patient092E  | Patient173B  |
| 570 | Patient092G  | Patient173A  |
| 570 | Patient092G  | Patient224B  |
| 570 | Patient092G  | Patient235B  |
| 570 | Patient092H  | Patient173A  |
| 570 | Patient092H  | Patient235C  |
| 570 | Patient103B  | Patient176   |
| 570 | Patient176   | Patient181A  |
| 570 | Patient181A  | Patient213A  |
| 571 | Patient021A1 | Patient158   |
| 571 | Patient032D  | Patient121A  |
| 571 | Patient034C  | Patient092A  |
| 571 | Patient034C  | Patient092B  |
| 571 | Patient034C  | Patient092E  |
| 571 | Patient053A1 | Patient220B  |
| 571 | Patient053A2 | Patient217B  |
| 571 | Patient053A2 | Patient217H  |
| 571 | Patient053B  | Patient217C  |

|     |              |             |
|-----|--------------|-------------|
| 571 | Patient053C  | Patient217D |
| 571 | Patient074A  | Patient092A |
| 571 | Patient074B  | Patient092B |
| 571 | Patient092B  | Patient173B |
| 571 | Patient092C  | Patient103A |
| 571 | Patient092C  | Patient120A |
| 571 | Patient092D  | Patient103A |
| 571 | Patient092G  | Patient224A |
| 571 | Patient092G  | Patient235C |
| 571 | Patient103E  | Patient213A |
| 571 | Patient109C  | Patient158  |
| 571 | Patient121A  | Patient145A |
| 571 | Patient121B  | Patient145C |
| 571 | Patient121B  | Patient176  |
| 571 | Patient126A  | Patient261D |
| 571 | Patient133   | Patient150A |
| 571 | Patient133   | Patient150B |
| 571 | Patient141A  | Patient213A |
| 571 | Patient158   | Patient222E |
| 571 | Patient158   | Patient222F |
| 571 | Patient158   | Patient252B |
| 571 | Patient192D  | Patient258E |
| 572 | Patient021A2 | Patient158  |
| 572 | Patient022B  | Patient161B |
| 572 | Patient032B  | Patient092H |
| 572 | Patient053A2 | Patient217E |
| 572 | Patient053A2 | Patient217F |
| 572 | Patient053B  | Patient217D |
| 572 | Patient053C  | Patient217B |
| 572 | Patient053C  | Patient217H |
| 572 | Patient054   | Patient204  |
| 572 | Patient074A  | Patient092B |
| 572 | Patient090   | Patient121B |
| 572 | Patient094D  | Patient158  |
| 572 | Patient126C  | Patient261D |
| 572 | Patient127A  | Patient158  |
| 572 | Patient149B  | Patient158  |
| 572 | Patient150B  | Patient224B |
| 572 | Patient158   | Patient196A |
| 572 | Patient213A  | Patient230F |
| 573 | Patient022B  | Patient230B |
| 573 | Patient032A  | Patient121A |
| 573 | Patient032B  | Patient092G |
| 573 | Patient034A  | Patient092H |
| 573 | Patient045A  | Patient235B |
| 573 | Patient053A2 | Patient217A |
| 573 | Patient053B  | Patient217B |
| 573 | Patient053B  | Patient217H |
| 573 | Patient053C  | Patient217E |
| 573 | Patient053C  | Patient217F |

|     |              |             |
|-----|--------------|-------------|
| 573 | Patient074A  | Patient092E |
| 573 | Patient086C  | Patient090  |
| 573 | Patient092A  | Patient103C |
| 573 | Patient092B  | Patient103C |
| 573 | Patient092C  | Patient181B |
| 573 | Patient092H  | Patient141D |
| 573 | Patient108F  | Patient158  |
| 573 | Patient109D  | Patient158  |
| 573 | Patient109E  | Patient158  |
| 573 | Patient121B  | Patient258E |
| 573 | Patient123B  | Patient133  |
| 573 | Patient123C  | Patient133  |
| 573 | Patient127B  | Patient158  |
| 573 | Patient141A  | Patient150A |
| 573 | Patient141A  | Patient150B |
| 573 | Patient141A  | Patient150C |
| 573 | Patient150A  | Patient224B |
| 573 | Patient150A  | Patient230A |
| 573 | Patient150B  | Patient230A |
| 573 | Patient150C  | Patient230A |
| 573 | Patient158   | Patient222D |
| 573 | Patient158   | Patient252D |
| 573 | Patient213A  | Patient230A |
| 574 | Patient034A  | Patient092G |
| 574 | Patient034B  | Patient092G |
| 574 | Patient045A  | Patient235C |
| 574 | Patient045B  | Patient235B |
| 574 | Patient053B  | Patient217E |
| 574 | Patient053B  | Patient217F |
| 574 | Patient053C  | Patient217A |
| 574 | Patient074B  | Patient092H |
| 574 | Patient074D  | Patient092C |
| 574 | Patient074D  | Patient092D |
| 574 | Patient074D  | Patient176  |
| 574 | Patient092A  | Patient181A |
| 574 | Patient092D  | Patient141A |
| 574 | Patient092E  | Patient103C |
| 574 | Patient092G  | Patient141D |
| 574 | Patient092H  | Patient173B |
| 574 | Patient103A  | Patient176  |
| 574 | Patient120A  | Patient133  |
| 574 | Patient133   | Patient150C |
| 574 | Patient150C  | Patient224B |
| 574 | Patient158   | Patient196B |
| 574 | Patient158   | Patient252A |
| 574 | Patient189B  | Patient210  |
| 575 | Patient034B  | Patient092H |
| 575 | Patient045B  | Patient235C |
| 575 | Patient053A1 | Patient206  |
| 575 | Patient053B  | Patient217A |

|     |              |             |
|-----|--------------|-------------|
| 575 | Patient074C  | Patient092A |
| 575 | Patient092C  | Patient141A |
| 575 | Patient092C  | Patient230A |
| 575 | Patient092E  | Patient181A |
| 575 | Patient092G  | Patient173B |
| 575 | Patient094E  | Patient158  |
| 575 | Patient126E  | Patient158  |
| 575 | Patient150B  | Patient230E |
| 575 | Patient150C  | Patient230E |
| 575 | Patient176   | Patient181B |
| 575 | Patient181B  | Patient213A |
| 575 | Patient189A  | Patient210  |
| 575 | Patient192D  | Patient217I |
| 575 | Patient192D  | Patient261D |
| 575 | Patient213A  | Patient230D |
| 575 | Patient213A  | Patient230E |
| 576 | Patient026F  | Patient121B |
| 576 | Patient034D  | Patient092H |
| 576 | Patient053A1 | Patient207  |
| 576 | Patient074B  | Patient092G |
| 576 | Patient074C  | Patient092B |
| 576 | Patient086A  | Patient090  |
| 576 | Patient086C  | Patient251  |
| 576 | Patient089A1 | Patient171  |
| 576 | Patient090   | Patient176  |
| 576 | Patient092A  | Patient120A |
| 576 | Patient092A  | Patient141C |
| 576 | Patient092B  | Patient141C |
| 576 | Patient092B  | Patient181A |
| 576 | Patient092D  | Patient230A |
| 576 | Patient092E  | Patient141C |
| 576 | Patient097B  | Patient158  |
| 576 | Patient150A  | Patient230E |
| 576 | Patient150A  | Patient230F |
| 576 | Patient150B  | Patient230F |
| 576 | Patient158   | Patient252F |
| 577 | Patient023   | Patient158  |
| 577 | Patient026B  | Patient121B |
| 577 | Patient034C  | Patient092H |
| 577 | Patient034D  | Patient092G |
| 577 | Patient034E  | Patient092H |
| 577 | Patient045C  | Patient235B |
| 577 | Patient053A1 | Patient195  |
| 577 | Patient074C  | Patient092E |
| 577 | Patient086B  | Patient090  |
| 577 | Patient086E  | Patient090  |
| 577 | Patient092A  | Patient141B |
| 577 | Patient092B  | Patient120A |
| 577 | Patient092B  | Patient141B |
| 577 | Patient092D  | Patient181B |

|     |              |             |
|-----|--------------|-------------|
| 577 | Patient092E  | Patient120A |
| 577 | Patient092E  | Patient141B |
| 577 | Patient103C  | Patient213A |
| 577 | Patient121A  | Patient192A |
| 577 | Patient150C  | Patient230D |
| 577 | Patient158   | Patient201B |
| 577 | Patient158   | Patient263B |
| 577 | Patient189E  | Patient210  |
| 577 | Patient196D  | Patient246D |
| 578 | Patient029   | Patient180  |
| 578 | Patient034C  | Patient092G |
| 578 | Patient034E  | Patient092G |
| 578 | Patient045C  | Patient235C |
| 578 | Patient074A  | Patient092H |
| 578 | Patient074E  | Patient092C |
| 578 | Patient086A  | Patient251  |
| 578 | Patient089A2 | Patient171  |
| 578 | Patient092A  | Patient103B |
| 578 | Patient092H  | Patient103C |
| 578 | Patient121A  | Patient192C |
| 578 | Patient150A  | Patient230D |
| 578 | Patient150B  | Patient230D |
| 578 | Patient158   | Patient159  |
| 578 | Patient158   | Patient246C |
| 578 | Patient213A  | Patient230B |
| 579 | Patient034A  | Patient121A |
| 579 | Patient053A2 | Patient217I |
| 579 | Patient074A  | Patient092G |
| 579 | Patient074A  | Patient213A |
| 579 | Patient074B  | Patient213A |
| 579 | Patient092B  | Patient103B |
| 579 | Patient092D  | Patient230B |
| 579 | Patient092E  | Patient103B |
| 579 | Patient121A  | Patient258E |
| 579 | Patient150A  | Patient230B |
| 579 | Patient150B  | Patient230B |
| 579 | Patient150C  | Patient230B |
| 579 | Patient150C  | Patient230F |
| 579 | Patient176   | Patient195  |
| 579 | Patient192D  | Patient217J |
| 579 | Patient192D  | Patient230D |
| 580 | Patient026A  | Patient121B |
| 580 | Patient026C  | Patient192D |
| 580 | Patient028   | Patient158  |
| 580 | Patient032B  | Patient121A |
| 580 | Patient053C  | Patient217I |
| 580 | Patient074E  | Patient092D |
| 580 | Patient092A  | Patient235A |
| 580 | Patient092B  | Patient235A |
| 580 | Patient092C  | Patient230B |

|     |              |             |
|-----|--------------|-------------|
| 580 | Patient092C  | Patient230F |
| 580 | Patient092D  | Patient120A |
| 580 | Patient092G  | Patient103C |
| 580 | Patient092H  | Patient181A |
| 580 | Patient103B  | Patient213A |
| 580 | Patient121A  | Patient141D |
| 580 | Patient123D  | Patient133  |
| 580 | Patient126D  | Patient158  |
| 580 | Patient133   | Patient173A |
| 580 | Patient158   | Patient196E |
| 580 | Patient206   | Patient258E |
| 580 | Patient207   | Patient258E |
| 581 | Patient026A  | Patient192D |
| 581 | Patient026D  | Patient192D |
| 581 | Patient053B  | Patient217I |
| 581 | Patient074C  | Patient092H |
| 581 | Patient074D  | Patient092A |
| 581 | Patient086B  | Patient251  |
| 581 | Patient086E  | Patient251  |
| 581 | Patient092A  | Patient103A |
| 581 | Patient092A  | Patient141A |
| 581 | Patient092B  | Patient103A |
| 581 | Patient092B  | Patient141A |
| 581 | Patient092C  | Patient230E |
| 581 | Patient092E  | Patient141A |
| 581 | Patient092E  | Patient235A |
| 581 | Patient092H  | Patient120A |
| 581 | Patient158   | Patient187  |
| 581 | Patient158   | Patient196C |
| 581 | Patient158   | Patient196D |
| 581 | Patient158   | Patient220A |
| 581 | Patient158   | Patient222C |
| 582 | Patient026F  | Patient192D |
| 582 | Patient032D  | Patient121B |
| 582 | Patient034E  | Patient121A |
| 582 | Patient053A2 | Patient258E |
| 582 | Patient053C  | Patient258E |
| 582 | Patient066F  | Patient213A |
| 582 | Patient074E  | Patient176  |
| 582 | Patient092D  | Patient230F |
| 582 | Patient092E  | Patient103A |
| 582 | Patient092G  | Patient181A |
| 582 | Patient158   | Patient246B |
| 582 | Patient206   | Patient217C |
| 582 | Patient207   | Patient217C |
| 583 | Patient022B  | Patient230E |
| 583 | Patient034B  | Patient121A |
| 583 | Patient038   | Patient204  |
| 583 | Patient066E  | Patient213A |
| 583 | Patient074C  | Patient092G |

|     |              |             |
|-----|--------------|-------------|
| 583 | Patient074C  | Patient213A |
| 583 | Patient074D  | Patient092B |
| 583 | Patient074D  | Patient092E |
| 583 | Patient092C  | Patient235A |
| 583 | Patient092D  | Patient230E |
| 583 | Patient092G  | Patient141C |
| 583 | Patient092H  | Patient103B |
| 583 | Patient092H  | Patient141C |
| 583 | Patient121A  | Patient192B |
| 583 | Patient121A  | Patient235F |
| 583 | Patient121B  | Patient145A |
| 583 | Patient158   | Patient201A |
| 583 | Patient158   | Patient201E |
| 583 | Patient206   | Patient217D |
| 583 | Patient207   | Patient217D |
| 584 | Patient032A  | Patient121B |
| 584 | Patient034D  | Patient121A |
| 584 | Patient053A2 | Patient217J |
| 584 | Patient053B  | Patient258E |
| 584 | Patient092A  | Patient181B |
| 584 | Patient092G  | Patient120A |
| 584 | Patient092H  | Patient141B |
| 584 | Patient133   | Patient173B |
| 584 | Patient206   | Patient217A |
| 584 | Patient206   | Patient217B |
| 584 | Patient207   | Patient217A |
| 584 | Patient207   | Patient217B |
| 585 | Patient026B  | Patient192D |
| 585 | Patient026C  | Patient121A |
| 585 | Patient026E  | Patient192D |
| 585 | Patient053C  | Patient217J |
| 585 | Patient092A  | Patient230A |
| 585 | Patient092D  | Patient235A |
| 585 | Patient092E  | Patient181B |
| 585 | Patient092G  | Patient103B |
| 585 | Patient104B  | Patient158  |
| 585 | Patient123A  | Patient235F |
| 585 | Patient206   | Patient217E |
| 585 | Patient206   | Patient217H |
| 585 | Patient207   | Patient217E |
| 585 | Patient207   | Patient217H |
| 586 | Patient053B  | Patient217J |
| 586 | Patient090   | Patient120A |
| 586 | Patient090   | Patient145B |
| 586 | Patient092B  | Patient181B |
| 586 | Patient092G  | Patient141B |
| 586 | Patient104A  | Patient158  |
| 586 | Patient206   | Patient217F |
| 586 | Patient207   | Patient217F |
| 587 | Patient034C  | Patient121A |



|     |              |             |
|-----|--------------|-------------|
| 587 | Patient074D  | Patient092H |
| 587 | Patient074E  | Patient092A |
| 587 | Patient081D  | Patient213A |
| 587 | Patient092B  | Patient230A |
| 587 | Patient092E  | Patient230A |
| 587 | Patient092G  | Patient103A |
| 587 | Patient092H  | Patient103A |
| 587 | Patient121A  | Patient235E |
| 587 | Patient123A  | Patient176  |
| 587 | Patient158   | Patient246E |
| 587 | Patient213A  | Patient224A |
| 588 | Patient088   | Patient171  |
| 588 | Patient092E  | Patient230F |
| 588 | Patient092H  | Patient141A |
| 588 | Patient092H  | Patient235A |
| 588 | Patient121B  | Patient192A |
| 588 | Patient158   | Patient246D |
| 589 | Patient074D  | Patient092G |
| 589 | Patient074E  | Patient092E |
| 589 | Patient081C  | Patient213A |
| 589 | Patient092A  | Patient230F |
| 589 | Patient092E  | Patient230E |
| 589 | Patient092G  | Patient141A |
| 589 | Patient092G  | Patient235A |
| 589 | Patient121B  | Patient192C |
| 589 | Patient123A  | Patient235E |
| 589 | Patient131   | Patient158  |
| 589 | Patient150A  | Patient176  |
| 590 | Patient034A  | Patient121B |
| 590 | Patient053A2 | Patient192D |
| 590 | Patient053C  | Patient192D |
| 590 | Patient074D  | Patient213A |
| 590 | Patient074E  | Patient092B |
| 590 | Patient092A  | Patient230B |
| 590 | Patient092A  | Patient230E |
| 590 | Patient092B  | Patient230E |
| 590 | Patient092B  | Patient230F |
| 590 | Patient123C  | Patient235F |
| 590 | Patient126C  | Patient133  |
| 590 | Patient150B  | Patient176  |
| 591 | Patient026D  | Patient133  |
| 591 | Patient032B  | Patient121B |
| 591 | Patient092H  | Patient181B |
| 591 | Patient121B  | Patient141D |
| 591 | Patient123B  | Patient176  |
| 591 | Patient123C  | Patient176  |
| 591 | Patient126A  | Patient133  |
| 591 | Patient150C  | Patient176  |
| 591 | Patient158   | Patient263A |
| 591 | Patient206   | Patient217I |

|     |              |              |
|-----|--------------|--------------|
| 591 | Patient207   | Patient217I  |
| 592 | Patient053B  | Patient192D  |
| 592 | Patient086C  | Patient133   |
| 592 | Patient092B  | Patient230B  |
| 592 | Patient092E  | Patient230B  |
| 592 | Patient092H  | Patient230A  |
| 592 | Patient103A  | Patient121A  |
| 592 | Patient158   | Patient196F  |
| 592 | Patient158   | Patient218A  |
| 593 | Patient026C  | Patient206   |
| 593 | Patient034E  | Patient121B  |
| 593 | Patient053A1 | Patient103D  |
| 593 | Patient053A1 | Patient261B  |
| 593 | Patient074E  | Patient092H  |
| 593 | Patient089A1 | Patient189C2 |
| 593 | Patient092A  | Patient192A  |
| 593 | Patient092C  | Patient192A  |
| 593 | Patient092C  | Patient192C  |
| 593 | Patient092E  | Patient192A  |
| 593 | Patient092G  | Patient181B  |
| 593 | Patient123A  | Patient235B  |
| 593 | Patient123B  | Patient235F  |
| 593 | Patient158   | Patient218B  |
| 593 | Patient192D  | Patient235B  |
| 593 | Patient192D  | Patient235C  |
| 593 | Patient220B  | Patient251   |
| 594 | Patient034B  | Patient121B  |
| 594 | Patient092B  | Patient192A  |
| 594 | Patient092G  | Patient230A  |
| 594 | Patient100A  | Patient158   |
| 594 | Patient121B  | Patient192B  |
| 594 | Patient121B  | Patient235F  |
| 594 | Patient123A  | Patient164   |
| 594 | Patient123A  | Patient235C  |
| 594 | Patient123C  | Patient235E  |
| 594 | Patient123D  | Patient235F  |
| 594 | Patient177   | Patient195   |
| 595 | Patient026C  | Patient207   |
| 595 | Patient034D  | Patient121B  |
| 595 | Patient045A  | Patient133   |
| 595 | Patient053A1 | Patient261A  |
| 595 | Patient074E  | Patient092G  |
| 595 | Patient074E  | Patient213A  |
| 595 | Patient086A  | Patient133   |
| 595 | Patient089A2 | Patient189C2 |
| 595 | Patient090   | Patient145C  |
| 595 | Patient092E  | Patient192C  |
| 595 | Patient092H  | Patient230E  |
| 595 | Patient092H  | Patient230F  |
| 595 | Patient123D  | Patient176   |

|     |              |              |
|-----|--------------|--------------|
| 596 | Patient053A1 | Patient103E  |
| 596 | Patient081D  | Patient090   |
| 596 | Patient091A  | Patient194   |
| 596 | Patient092A  | Patient192C  |
| 596 | Patient092B  | Patient192C  |
| 596 | Patient092G  | Patient230F  |
| 596 | Patient092H  | Patient230B  |
| 596 | Patient173A  | Patient213A  |
| 596 | Patient173B  | Patient213A  |
| 597 | Patient026C  | Patient121B  |
| 597 | Patient032E  | Patient090   |
| 597 | Patient053A1 | Patient092C  |
| 597 | Patient086B  | Patient133   |
| 597 | Patient086E  | Patient133   |
| 597 | Patient089A1 | Patient189C1 |
| 597 | Patient090   | Patient167   |
| 597 | Patient092D  | Patient192A  |
| 597 | Patient092G  | Patient230E  |
| 597 | Patient092H  | Patient192A  |
| 597 | Patient121A  | Patient192E  |
| 597 | Patient123B  | Patient235E  |
| 597 | Patient206   | Patient217J  |
| 597 | Patient207   | Patient217J  |
| 598 | Patient034C  | Patient121B  |
| 598 | Patient045B  | Patient133   |
| 598 | Patient081C  | Patient090   |
| 598 | Patient090   | Patient150A  |
| 598 | Patient092C  | Patient192B  |
| 598 | Patient099A  | Patient158   |
| 598 | Patient121A  | Patient217C  |
| 598 | Patient121B  | Patient235E  |
| 598 | Patient123C  | Patient164   |
| 598 | Patient123C  | Patient235B  |
| 598 | Patient123D  | Patient235E  |
| 599 | Patient022B  | Patient258G  |
| 599 | Patient026B  | Patient133   |
| 599 | Patient026F  | Patient133   |
| 599 | Patient045C  | Patient133   |
| 599 | Patient081A2 | Patient090   |
| 599 | Patient081A2 | Patient213A  |
| 599 | Patient081B  | Patient213A  |
| 599 | Patient089A2 | Patient189C1 |
| 599 | Patient092D  | Patient192C  |
| 599 | Patient092G  | Patient230B  |
| 599 | Patient092H  | Patient192C  |
| 599 | Patient099B  | Patient158   |
| 599 | Patient120D  | Patient123A  |
| 599 | Patient121A  | Patient217D  |
| 599 | Patient123B  | Patient164   |
| 599 | Patient123C  | Patient235C  |

|     |              |              |
|-----|--------------|--------------|
| 599 | Patient173B  | Patient176   |
| 600 | Patient022B  | Patient258B  |
| 600 | Patient022B  | Patient258D  |
| 600 | Patient026E  | Patient133   |
| 600 | Patient053A1 | Patient092A  |
| 600 | Patient090   | Patient123A  |
| 600 | Patient090   | Patient150B  |
| 600 | Patient092G  | Patient192A  |
| 600 | Patient121A  | Patient217B  |
| 600 | Patient145C  | Patient235A  |
| 601 | Patient026A  | Patient133   |
| 601 | Patient026D  | Patient045A  |
| 601 | Patient026D  | Patient090   |
| 601 | Patient032C  | Patient090   |
| 601 | Patient053A1 | Patient261D  |
| 601 | Patient081A1 | Patient213A  |
| 601 | Patient081B  | Patient090   |
| 601 | Patient090   | Patient150C  |
| 601 | Patient092A  | Patient192B  |
| 601 | Patient092E  | Patient192B  |
| 601 | Patient099E  | Patient158   |
| 601 | Patient121A  | Patient192F  |
| 601 | Patient121A  | Patient217A  |
| 601 | Patient121A  | Patient217E  |
| 601 | Patient121A  | Patient217H  |
| 601 | Patient123B  | Patient235B  |
| 601 | Patient133   | Patient213A  |
| 602 | Patient022B  | Patient026C  |
| 602 | Patient026A  | Patient045A  |
| 602 | Patient026D  | Patient045B  |
| 602 | Patient081F  | Patient213A  |
| 602 | Patient092B  | Patient192B  |
| 602 | Patient092D  | Patient192B  |
| 602 | Patient092G  | Patient192C  |
| 602 | Patient100B  | Patient179   |
| 602 | Patient120B  | Patient123A  |
| 602 | Patient120D  | Patient123B  |
| 602 | Patient120D  | Patient123C  |
| 602 | Patient121A  | Patient217F  |
| 602 | Patient123B  | Patient235C  |
| 602 | Patient123D  | Patient164   |
| 603 | Patient022B  | Patient258A1 |
| 603 | Patient022B  | Patient258A2 |
| 603 | Patient022B  | Patient258F  |
| 603 | Patient026A  | Patient045B  |
| 603 | Patient032D  | Patient235A  |
| 603 | Patient053A1 | Patient092D  |
| 603 | Patient053A1 | Patient092E  |
| 603 | Patient053A2 | Patient092C  |
| 603 | Patient081A1 | Patient090   |

|     |              |              |
|-----|--------------|--------------|
| 603 | Patient086C  | Patient176   |
| 603 | Patient090   | Patient123B  |
| 603 | Patient090   | Patient123C  |
| 603 | Patient099D  | Patient158   |
| 603 | Patient100B  | Patient180   |
| 603 | Patient103A  | Patient121B  |
| 603 | Patient120C  | Patient123A  |
| 603 | Patient121B  | Patient217C  |
| 603 | Patient123D  | Patient235C  |
| 604 | Patient026D  | Patient176   |
| 604 | Patient053A1 | Patient092B  |
| 604 | Patient053C  | Patient092C  |
| 604 | Patient074B  | Patient192D  |
| 604 | Patient088   | Patient189C2 |
| 604 | Patient092H  | Patient192B  |
| 604 | Patient121B  | Patient217D  |
| 604 | Patient123D  | Patient235B  |
| 604 | Patient192A  | Patient235F  |
| 605 | Patient026B  | Patient045A  |
| 605 | Patient026D  | Patient045C  |
| 605 | Patient026F  | Patient045A  |
| 605 | Patient045A  | Patient217C  |
| 605 | Patient045B  | Patient217C  |
| 605 | Patient053B  | Patient092C  |
| 605 | Patient081E  | Patient213A  |
| 605 | Patient099C  | Patient158   |
| 605 | Patient121B  | Patient217B  |
| 605 | Patient145B  | Patient206   |
| 605 | Patient145B  | Patient207   |
| 606 | Patient026A  | Patient045C  |
| 606 | Patient045A  | Patient217D  |
| 606 | Patient045B  | Patient217D  |
| 606 | Patient053A1 | Patient092H  |
| 606 | Patient053A2 | Patient092A  |
| 606 | Patient081E  | Patient090   |
| 606 | Patient086A  | Patient176   |
| 606 | Patient086B  | Patient176   |
| 606 | Patient120B  | Patient123C  |
| 606 | Patient120D  | Patient123D  |
| 606 | Patient121B  | Patient217A  |
| 606 | Patient121B  | Patient217E  |
| 606 | Patient121B  | Patient217H  |
| 607 | Patient026B  | Patient045B  |
| 607 | Patient026B  | Patient045C  |
| 607 | Patient026F  | Patient045B  |
| 607 | Patient045A  | Patient217B  |
| 607 | Patient045B  | Patient217B  |
| 607 | Patient045B  | Patient217H  |
| 607 | Patient053A1 | Patient092G  |
| 607 | Patient053C  | Patient092A  |

|     |              |              |
|-----|--------------|--------------|
| 607 | Patient086E  | Patient176   |
| 607 | Patient090   | Patient206   |
| 607 | Patient090   | Patient207   |
| 607 | Patient092G  | Patient192B  |
| 607 | Patient120B  | Patient123B  |
| 607 | Patient121B  | Patient217F  |
| 608 | Patient022B  | Patient053A1 |
| 608 | Patient026F  | Patient045C  |
| 608 | Patient045A  | Patient217A  |
| 608 | Patient045A  | Patient217E  |
| 608 | Patient045A  | Patient217H  |
| 608 | Patient045B  | Patient217A  |
| 608 | Patient045B  | Patient217E  |
| 608 | Patient045B  | Patient217F  |
| 608 | Patient045C  | Patient217C  |
| 608 | Patient053A2 | Patient092D  |
| 608 | Patient053A2 | Patient092E  |
| 608 | Patient053B  | Patient092A  |
| 608 | Patient053C  | Patient092E  |
| 608 | Patient081F  | Patient090   |
| 608 | Patient090   | Patient145A  |
| 608 | Patient120C  | Patient123C  |
| 608 | Patient121A  | Patient217I  |
| 608 | Patient121B  | Patient192E  |
| 608 | Patient192A  | Patient235E  |
| 608 | Patient192C  | Patient235F  |
| 609 | Patient026E  | Patient045A  |
| 609 | Patient026E  | Patient090   |
| 609 | Patient032A  | Patient235A  |
| 609 | Patient032D  | Patient090   |
| 609 | Patient045A  | Patient217F  |
| 609 | Patient053A2 | Patient092B  |
| 609 | Patient053B  | Patient092E  |
| 609 | Patient053C  | Patient092D  |
| 609 | Patient074A  | Patient192D  |
| 609 | Patient081D  | Patient235B  |
| 609 | Patient088   | Patient189C1 |
| 609 | Patient090   | Patient123D  |
| 609 | Patient090   | Patient181A  |
| 609 | Patient120C  | Patient123B  |
| 609 | Patient123A  | Patient235A  |
| 609 | Patient133   | Patient177   |
| 610 | Patient026E  | Patient045B  |
| 610 | Patient045C  | Patient217D  |
| 610 | Patient053B  | Patient092D  |
| 610 | Patient053C  | Patient092B  |
| 610 | Patient081C  | Patient235C  |
| 610 | Patient081D  | Patient235C  |
| 610 | Patient090   | Patient161B  |
| 610 | Patient126C  | Patient176   |

|     |              |             |
|-----|--------------|-------------|
| 610 | Patient176   | Patient206  |
| 611 | Patient045C  | Patient217B |
| 611 | Patient045C  | Patient217E |
| 611 | Patient045C  | Patient217F |
| 611 | Patient053B  | Patient092B |
| 611 | Patient081C  | Patient235B |
| 611 | Patient090   | Patient261E |
| 611 | Patient092C  | Patient192E |
| 611 | Patient092C  | Patient195  |
| 611 | Patient120B  | Patient123D |
| 611 | Patient158   | Patient232B |
| 611 | Patient192C  | Patient235E |
| 612 | Patient026B  | Patient235F |
| 612 | Patient032A  | Patient090  |
| 612 | Patient045A  | Patient217I |
| 612 | Patient045B  | Patient217I |
| 612 | Patient045C  | Patient217A |
| 612 | Patient045C  | Patient217H |
| 612 | Patient053A2 | Patient092H |
| 612 | Patient053C  | Patient092G |
| 612 | Patient066D  | Patient090  |
| 612 | Patient074C  | Patient192D |
| 612 | Patient090   | Patient261C |
| 612 | Patient121A  | Patient261B |
| 612 | Patient121B  | Patient192F |
| 612 | Patient158   | Patient232A |
| 613 | Patient026A  | Patient235F |
| 613 | Patient026E  | Patient045C |
| 613 | Patient026E  | Patient176  |
| 613 | Patient026F  | Patient235F |
| 613 | Patient053A2 | Patient092G |
| 613 | Patient053C  | Patient092H |
| 613 | Patient090   | Patient213A |
| 613 | Patient090   | Patient261A |
| 613 | Patient090   | Patient261B |
| 613 | Patient120C  | Patient123D |
| 613 | Patient121A  | Patient217J |
| 613 | Patient158   | Patient232D |
| 613 | Patient158   | Patient232E |
| 613 | Patient164   | Patient177  |
| 614 | Patient034A  | Patient235A |
| 614 | Patient045A  | Patient176  |
| 614 | Patient053B  | Patient092H |
| 614 | Patient092A  | Patient192E |
| 614 | Patient092C  | Patient192F |
| 614 | Patient145A  | Patient235A |
| 614 | Patient158   | Patient232C |
| 615 | Patient032B  | Patient090  |
| 615 | Patient032B  | Patient235A |
| 615 | Patient034E  | Patient235A |

|     |              |              |
|-----|--------------|--------------|
| 615 | Patient053B  | Patient092G  |
| 615 | Patient092D  | Patient195   |
| 615 | Patient092E  | Patient192E  |
| 615 | Patient121A  | Patient261A  |
| 615 | Patient121B  | Patient217I  |
| 615 | Patient123C  | Patient235A  |
| 615 | Patient150A  | Patient195   |
| 615 | Patient150B  | Patient195   |
| 615 | Patient192B  | Patient235F  |
| 616 | Patient022B  | Patient217C  |
| 616 | Patient022B  | Patient258E  |
| 616 | Patient026B  | Patient235E  |
| 616 | Patient045C  | Patient217I  |
| 616 | Patient069   | Patient238   |
| 616 | Patient092B  | Patient192E  |
| 616 | Patient092D  | Patient192E  |
| 616 | Patient145C  | Patient206   |
| 616 | Patient150C  | Patient195   |
| 616 | Patient152B  | Patient208   |
| 617 | Patient022B  | Patient217F  |
| 617 | Patient026A  | Patient235E  |
| 617 | Patient026B  | Patient176   |
| 617 | Patient026F  | Patient176   |
| 617 | Patient026F  | Patient235E  |
| 617 | Patient032E  | Patient206   |
| 617 | Patient032E  | Patient207   |
| 617 | Patient034A  | Patient090   |
| 617 | Patient034D  | Patient235A  |
| 617 | Patient045D  | Patient158   |
| 617 | Patient053A1 | Patient235F  |
| 617 | Patient053C  | Patient235F  |
| 617 | Patient081D  | Patient206   |
| 617 | Patient090   | Patient181B  |
| 617 | Patient090   | Patient230G  |
| 617 | Patient145C  | Patient207   |
| 618 | Patient022B  | Patient217D  |
| 618 | Patient026A  | Patient176   |
| 618 | Patient032D  | Patient053A2 |
| 618 | Patient034B  | Patient090   |
| 618 | Patient034B  | Patient235A  |
| 618 | Patient045B  | Patient176   |
| 618 | Patient053B  | Patient235F  |
| 618 | Patient066E  | Patient090   |
| 618 | Patient081D  | Patient207   |
| 618 | Patient086C  | Patient167   |
| 618 | Patient086C  | Patient206   |
| 618 | Patient092A  | Patient192F  |
| 618 | Patient092B  | Patient192F  |
| 618 | Patient092E  | Patient192F  |
| 618 | Patient092H  | Patient192E  |



|     |              |             |
|-----|--------------|-------------|
| 618 | Patient121B  | Patient192D |
| 618 | Patient121B  | Patient217J |
| 618 | Patient123B  | Patient235A |
| 618 | Patient152A  | Patient208  |
| 619 | Patient022B  | Patient217B |
| 619 | Patient032D  | Patient053C |
| 619 | Patient034D  | Patient090  |
| 619 | Patient034E  | Patient090  |
| 619 | Patient045C  | Patient176  |
| 619 | Patient053A2 | Patient235F |
| 619 | Patient066F  | Patient090  |
| 619 | Patient074D  | Patient192D |
| 619 | Patient081C  | Patient206  |
| 619 | Patient086C  | Patient207  |
| 619 | Patient090   | Patient224B |
| 619 | Patient090   | Patient261D |
| 619 | Patient090   | Patient261G |
| 619 | Patient123D  | Patient235A |
| 619 | Patient192B  | Patient235E |
| 620 | Patient022B  | Patient217E |
| 620 | Patient022B  | Patient217H |
| 620 | Patient032D  | Patient053B |
| 620 | Patient045A  | Patient217J |
| 620 | Patient045B  | Patient217J |
| 620 | Patient054   | Patient205  |
| 620 | Patient081C  | Patient207  |
| 620 | Patient090   | Patient141G |
| 620 | Patient090   | Patient224A |
| 620 | Patient092D  | Patient192F |
| 620 | Patient121A  | Patient192D |
| 621 | Patient022B  | Patient217A |
| 621 | Patient029   | Patient069  |
| 621 | Patient032C  | Patient206  |
| 621 | Patient032C  | Patient207  |
| 621 | Patient034C  | Patient090  |
| 621 | Patient034C  | Patient235A |
| 621 | Patient045A  | Patient090  |
| 621 | Patient053A1 | Patient235E |
| 621 | Patient053A2 | Patient133  |
| 621 | Patient053C  | Patient235E |
| 621 | Patient081A2 | Patient206  |
| 621 | Patient081B  | Patient206  |
| 621 | Patient086A  | Patient206  |
| 621 | Patient092G  | Patient192E |
| 621 | Patient120B  | Patient161B |
| 621 | Patient120D  | Patient161B |
| 621 | Patient121A  | Patient261D |
| 621 | Patient141D  | Patient235A |
| 622 | Patient045C  | Patient217J |
| 622 | Patient053A1 | Patient235A |

|     |              |              |
|-----|--------------|--------------|
| 622 | Patient053B  | Patient235E  |
| 622 | Patient053C  | Patient133   |
| 622 | Patient081A1 | Patient206   |
| 622 | Patient081A2 | Patient207   |
| 622 | Patient081B  | Patient207   |
| 622 | Patient086A  | Patient167   |
| 622 | Patient086A  | Patient207   |
| 622 | Patient086B  | Patient206   |
| 622 | Patient086E  | Patient206   |
| 622 | Patient090   | Patient230C  |
| 622 | Patient120C  | Patient161B  |
| 623 | Patient032A  | Patient206   |
| 623 | Patient053A2 | Patient235E  |
| 623 | Patient053B  | Patient133   |
| 623 | Patient081A1 | Patient207   |
| 623 | Patient086B  | Patient207   |
| 623 | Patient086E  | Patient207   |
| 623 | Patient092G  | Patient192F  |
| 623 | Patient092H  | Patient192F  |
| 623 | Patient121B  | Patient261B  |
| 624 | Patient032A  | Patient207   |
| 624 | Patient045A  | Patient258B  |
| 624 | Patient045B  | Patient090   |
| 624 | Patient045B  | Patient258B  |
| 624 | Patient053A1 | Patient235B  |
| 624 | Patient053A2 | Patient066D  |
| 624 | Patient086A  | Patient258G  |
| 624 | Patient086C  | Patient258G  |
| 624 | Patient092A  | Patient195   |
| 624 | Patient092B  | Patient195   |
| 624 | Patient176   | Patient235A  |
| 625 | Patient045A  | Patient258D  |
| 625 | Patient045A  | Patient258G  |
| 625 | Patient045B  | Patient258G  |
| 625 | Patient053A2 | Patient145C  |
| 625 | Patient053C  | Patient066D  |
| 625 | Patient074E  | Patient192D  |
| 625 | Patient086A  | Patient258B  |
| 625 | Patient086A  | Patient258D  |
| 625 | Patient086B  | Patient167   |
| 625 | Patient086C  | Patient258B  |
| 625 | Patient086C  | Patient258D  |
| 625 | Patient086E  | Patient167   |
| 625 | Patient090   | Patient103C  |
| 625 | Patient090   | Patient141F  |
| 625 | Patient092E  | Patient195   |
| 625 | Patient120A  | Patient145C  |
| 626 | Patient032A  | Patient053A2 |
| 626 | Patient032B  | Patient206   |
| 626 | Patient032B  | Patient207   |

|     |              |              |
|-----|--------------|--------------|
| 626 | Patient045A  | Patient258A1 |
| 626 | Patient045B  | Patient258A1 |
| 626 | Patient045C  | Patient258G  |
| 626 | Patient053A1 | Patient235C  |
| 626 | Patient053B  | Patient066D  |
| 626 | Patient053C  | Patient145C  |
| 626 | Patient074B  | Patient150A  |
| 626 | Patient074B  | Patient150B  |
| 626 | Patient086B  | Patient258B  |
| 626 | Patient086E  | Patient258B  |
| 626 | Patient121B  | Patient261A  |
| 626 | Patient192D  | Patient207   |
| 627 | Patient022B  | Patient090   |
| 627 | Patient022B  | Patient217I  |
| 627 | Patient032A  | Patient053C  |
| 627 | Patient034A  | Patient206   |
| 627 | Patient034A  | Patient207   |
| 627 | Patient045A  | Patient258A2 |
| 627 | Patient045A  | Patient258F  |
| 627 | Patient045B  | Patient258A2 |
| 627 | Patient045B  | Patient258D  |
| 627 | Patient045C  | Patient258B  |
| 627 | Patient053B  | Patient145C  |
| 627 | Patient066D  | Patient206   |
| 627 | Patient066D  | Patient207   |
| 627 | Patient069   | Patient100B  |
| 627 | Patient074A  | Patient150B  |
| 627 | Patient081E  | Patient206   |
| 627 | Patient086A  | Patient258A1 |
| 627 | Patient086B  | Patient258D  |
| 627 | Patient086B  | Patient258G  |
| 627 | Patient086C  | Patient258A1 |
| 627 | Patient086E  | Patient258D  |
| 627 | Patient086E  | Patient258G  |
| 627 | Patient090   | Patient183B  |
| 627 | Patient092C  | Patient133   |
| 627 | Patient120A  | Patient207   |
| 627 | Patient192D  | Patient206   |
| 628 | Patient022B  | Patient224B  |
| 628 | Patient026B  | Patient090   |
| 628 | Patient032A  | Patient053B  |
| 628 | Patient045B  | Patient258F  |
| 628 | Patient045C  | Patient090   |
| 628 | Patient045C  | Patient258D  |
| 628 | Patient053C  | Patient235B  |
| 628 | Patient053C  | Patient235C  |
| 628 | Patient074A  | Patient150A  |
| 628 | Patient074B  | Patient150C  |
| 628 | Patient081E  | Patient207   |
| 628 | Patient086A  | Patient258A2 |

|     |              |              |
|-----|--------------|--------------|
| 628 | Patient086A  | Patient258F  |
| 628 | Patient086C  | Patient258A2 |
| 628 | Patient086C  | Patient258F  |
| 628 | Patient090   | Patient103B  |
| 628 | Patient090   | Patient183C  |
| 628 | Patient145A  | Patient206   |
| 628 | Patient145A  | Patient207   |
| 628 | Patient206   | Patient261E  |
| 628 | Patient207   | Patient261E  |
| 629 | Patient026F  | Patient090   |
| 629 | Patient034B  | Patient206   |
| 629 | Patient034B  | Patient207   |
| 629 | Patient038   | Patient205   |
| 629 | Patient045C  | Patient258A1 |
| 629 | Patient053B  | Patient235B  |
| 629 | Patient074A  | Patient150C  |
| 629 | Patient081C  | Patient120D  |
| 629 | Patient081D  | Patient120D  |
| 629 | Patient081F  | Patient206   |
| 629 | Patient086B  | Patient258A1 |
| 629 | Patient086B  | Patient258A2 |
| 629 | Patient086B  | Patient258F  |
| 629 | Patient086E  | Patient258A1 |
| 629 | Patient086E  | Patient258A2 |
| 629 | Patient086E  | Patient258F  |
| 629 | Patient090   | Patient177   |
| 629 | Patient180   | Patient189C2 |
| 629 | Patient192E  | Patient235F  |
| 629 | Patient207   | Patient230G  |
| 630 | Patient022B  | Patient217J  |
| 630 | Patient026A  | Patient090   |
| 630 | Patient034D  | Patient206   |
| 630 | Patient034D  | Patient207   |
| 630 | Patient034E  | Patient206   |
| 630 | Patient034E  | Patient207   |
| 630 | Patient045C  | Patient258A2 |
| 630 | Patient045C  | Patient258F  |
| 630 | Patient053A2 | Patient235B  |
| 630 | Patient053B  | Patient235C  |
| 630 | Patient081D  | Patient120B  |
| 630 | Patient081F  | Patient207   |
| 630 | Patient090   | Patient141D  |
| 630 | Patient092H  | Patient195   |
| 630 | Patient120A  | Patient206   |
| 630 | Patient192A  | Patient235B  |
| 630 | Patient192A  | Patient235C  |
| 630 | Patient192F  | Patient235F  |
| 630 | Patient206   | Patient230G  |
| 630 | Patient206   | Patient261C  |
| 630 | Patient207   | Patient261C  |

|     |              |              |
|-----|--------------|--------------|
| 631 | Patient022B  | Patient224A  |
| 631 | Patient053A2 | Patient235C  |
| 631 | Patient066E  | Patient207   |
| 631 | Patient074C  | Patient150B  |
| 631 | Patient081D  | Patient120C  |
| 631 | Patient090   | Patient141C  |
| 631 | Patient092G  | Patient195   |
| 631 | Patient123A  | Patient192A  |
| 631 | Patient180   | Patient189C1 |
| 631 | Patient207   | Patient235A  |
| 632 | Patient032B  | Patient053A2 |
| 632 | Patient034A  | Patient053A2 |
| 632 | Patient034C  | Patient206   |
| 632 | Patient074C  | Patient150A  |
| 632 | Patient081C  | Patient120B  |
| 632 | Patient090   | Patient183A  |
| 632 | Patient090   | Patient183D  |
| 632 | Patient090   | Patient230F  |
| 632 | Patient121A  | Patient126A  |
| 632 | Patient121B  | Patient261D  |
| 632 | Patient123A  | Patient192C  |
| 632 | Patient141G  | Patient206   |
| 632 | Patient141G  | Patient207   |
| 632 | Patient192A  | Patient192D  |
| 632 | Patient192C  | Patient235C  |
| 633 | Patient032B  | Patient053C  |
| 633 | Patient034A  | Patient053C  |
| 633 | Patient034B  | Patient053C  |
| 633 | Patient034C  | Patient207   |
| 633 | Patient053A2 | Patient224B  |
| 633 | Patient066E  | Patient206   |
| 633 | Patient066F  | Patient206   |
| 633 | Patient066F  | Patient207   |
| 633 | Patient069   | Patient179   |
| 633 | Patient074C  | Patient150C  |
| 633 | Patient081C  | Patient120C  |
| 633 | Patient090   | Patient183E  |
| 633 | Patient090   | Patient230E  |
| 633 | Patient133   | Patient235B  |
| 633 | Patient192C  | Patient235B  |
| 633 | Patient192E  | Patient235E  |
| 633 | Patient206   | Patient230C  |
| 633 | Patient206   | Patient261B  |
| 633 | Patient207   | Patient230C  |
| 633 | Patient207   | Patient261B  |
| 634 | Patient026C  | Patient235F  |
| 634 | Patient032B  | Patient053B  |
| 634 | Patient034A  | Patient053B  |
| 634 | Patient034B  | Patient053A2 |
| 634 | Patient034E  | Patient053A2 |

|     |              |              |
|-----|--------------|--------------|
| 634 | Patient053A2 | Patient141D  |
| 634 | Patient053C  | Patient224B  |
| 634 | Patient090   | Patient103A  |
| 634 | Patient090   | Patient141A  |
| 634 | Patient133   | Patient235F  |
| 634 | Patient192C  | Patient192D  |
| 634 | Patient192F  | Patient235E  |
| 634 | Patient193   | Patient238   |
| 634 | Patient206   | Patient261A  |
| 634 | Patient207   | Patient261A  |
| 635 | Patient034E  | Patient053C  |
| 635 | Patient053A2 | Patient176   |
| 635 | Patient053B  | Patient224B  |
| 635 | Patient053C  | Patient141D  |
| 635 | Patient121A  | Patient126C  |
| 635 | Patient133   | Patient235C  |
| 635 | Patient141D  | Patient206   |
| 635 | Patient141D  | Patient207   |
| 635 | Patient164   | Patient235F  |
| 636 | Patient034B  | Patient053B  |
| 636 | Patient034D  | Patient053A2 |
| 636 | Patient034E  | Patient053B  |
| 636 | Patient053B  | Patient141D  |
| 636 | Patient053C  | Patient176   |
| 636 | Patient086C  | Patient164   |
| 636 | Patient090   | Patient141B  |
| 636 | Patient090   | Patient230D  |
| 636 | Patient120B  | Patient258E  |
| 636 | Patient123C  | Patient192A  |
| 636 | Patient207   | Patient224B  |
| 637 | Patient034D  | Patient053C  |
| 637 | Patient053A1 | Patient192A  |
| 637 | Patient053A2 | Patient126A  |
| 637 | Patient053B  | Patient176   |
| 637 | Patient053C  | Patient126A  |
| 637 | Patient086A  | Patient164   |
| 637 | Patient090   | Patient220B  |
| 637 | Patient120A  | Patient123A  |
| 637 | Patient120C  | Patient258E  |
| 637 | Patient123C  | Patient192C  |
| 637 | Patient141F  | Patient206   |
| 637 | Patient141F  | Patient207   |
| 638 | Patient026C  | Patient235E  |
| 638 | Patient034C  | Patient053A2 |
| 638 | Patient034D  | Patient053B  |
| 638 | Patient053A2 | Patient066E  |
| 638 | Patient053A2 | Patient066F  |
| 638 | Patient053A2 | Patient145A  |
| 638 | Patient086B  | Patient164   |
| 638 | Patient086E  | Patient164   |

|     |              |              |
|-----|--------------|--------------|
| 638 | Patient092C  | Patient103D  |
| 638 | Patient092D  | Patient103D  |
| 638 | Patient092D  | Patient133   |
| 638 | Patient120D  | Patient258E  |
| 638 | Patient123A  | Patient192B  |
| 638 | Patient123B  | Patient192A  |
| 638 | Patient133   | Patient220B  |
| 638 | Patient133   | Patient235E  |
| 638 | Patient207   | Patient261D  |
| 639 | Patient026C  | Patient045A  |
| 639 | Patient034C  | Patient053C  |
| 639 | Patient053A1 | Patient192C  |
| 639 | Patient053A2 | Patient081A2 |
| 639 | Patient053A2 | Patient090   |
| 639 | Patient053A2 | Patient126C  |
| 639 | Patient053A2 | Patient192A  |
| 639 | Patient053B  | Patient126A  |
| 639 | Patient053C  | Patient066E  |
| 639 | Patient053C  | Patient066F  |
| 639 | Patient053C  | Patient090   |
| 639 | Patient053C  | Patient126C  |
| 639 | Patient053C  | Patient145A  |
| 639 | Patient120A  | Patient145A  |
| 639 | Patient149A  | Patient210   |
| 639 | Patient164   | Patient235E  |
| 639 | Patient192B  | Patient192D  |
| 639 | Patient206   | Patient261D  |
| 639 | Patient206   | Patient261G  |
| 639 | Patient207   | Patient261G  |
| 640 | Patient026C  | Patient045B  |
| 640 | Patient034C  | Patient053B  |
| 640 | Patient053A2 | Patient074B  |
| 640 | Patient053B  | Patient066F  |
| 640 | Patient053B  | Patient145A  |
| 640 | Patient053C  | Patient081A2 |
| 640 | Patient053C  | Patient192A  |
| 640 | Patient074D  | Patient150A  |
| 640 | Patient074D  | Patient150B  |
| 640 | Patient103D  | Patient176   |
| 640 | Patient120B  | Patient121A  |
| 640 | Patient123B  | Patient192C  |
| 640 | Patient141C  | Patient206   |
| 640 | Patient141C  | Patient207   |
| 640 | Patient206   | Patient224B  |
| 640 | Patient217C  | Patient235F  |
| 641 | Patient022B  | Patient103C  |
| 641 | Patient032D  | Patient120A  |
| 641 | Patient053A2 | Patient081B  |
| 641 | Patient053A2 | Patient192C  |
| 641 | Patient053B  | Patient066E  |

|     |              |              |
|-----|--------------|--------------|
| 641 | Patient053B  | Patient081A2 |
| 641 | Patient053B  | Patient090   |
| 641 | Patient053B  | Patient126C  |
| 641 | Patient053B  | Patient192A  |
| 641 | Patient053C  | Patient074B  |
| 641 | Patient053C  | Patient192C  |
| 641 | Patient074D  | Patient150C  |
| 641 | Patient120A  | Patient123B  |
| 641 | Patient120A  | Patient123C  |
| 641 | Patient120D  | Patient121B  |
| 641 | Patient123D  | Patient192A  |
| 641 | Patient133   | Patient192A  |
| 641 | Patient141B  | Patient206   |
| 641 | Patient141B  | Patient207   |
| 641 | Patient192A  | Patient235A  |
| 641 | Patient192B  | Patient235B  |
| 641 | Patient192B  | Patient235C  |
| 641 | Patient217D  | Patient235F  |
| 642 | Patient053B  | Patient074B  |
| 642 | Patient053B  | Patient192C  |
| 642 | Patient053C  | Patient081B  |
| 642 | Patient069   | Patient089A1 |
| 642 | Patient120C  | Patient121A  |
| 642 | Patient123D  | Patient192C  |
| 642 | Patient217B  | Patient235F  |
| 643 | Patient022B  | Patient121A  |
| 643 | Patient026C  | Patient045C  |
| 643 | Patient053A2 | Patient074A  |
| 643 | Patient053A2 | Patient181A  |
| 643 | Patient053B  | Patient081B  |
| 643 | Patient074E  | Patient150A  |
| 643 | Patient092D  | Patient103E  |
| 643 | Patient121B  | Patient126A  |
| 643 | Patient123B  | Patient192B  |
| 643 | Patient123C  | Patient192B  |
| 643 | Patient133   | Patient192C  |
| 643 | Patient141A  | Patient206   |
| 643 | Patient141A  | Patient207   |
| 643 | Patient217E  | Patient235F  |
| 643 | Patient217H  | Patient235F  |
| 644 | Patient032A  | Patient120A  |
| 644 | Patient053A1 | Patient192B  |
| 644 | Patient053A2 | Patient081A1 |
| 644 | Patient053A2 | Patient103C  |
| 644 | Patient053A2 | Patient224A  |
| 644 | Patient053C  | Patient074A  |
| 644 | Patient053C  | Patient103A  |
| 644 | Patient053C  | Patient181A  |
| 644 | Patient074E  | Patient150B  |
| 644 | Patient089A1 | Patient238   |



|     |              |              |
|-----|--------------|--------------|
| 644 | Patient090   | Patient126A  |
| 644 | Patient090   | Patient126C  |
| 644 | Patient092C  | Patient103E  |
| 644 | Patient103E  | Patient176   |
| 644 | Patient133   | Patient192B  |
| 644 | Patient217A  | Patient235F  |
| 644 | Patient217F  | Patient235F  |
| 644 | Patient235F  | Patient258E  |
| 645 | Patient053A2 | Patient103A  |
| 645 | Patient053A2 | Patient164   |
| 645 | Patient053A2 | Patient192B  |
| 645 | Patient053B  | Patient074A  |
| 645 | Patient053B  | Patient181A  |
| 645 | Patient053C  | Patient081A1 |
| 645 | Patient053C  | Patient103C  |
| 645 | Patient053C  | Patient224A  |
| 645 | Patient069   | Patient089A2 |
| 645 | Patient090   | Patient230A  |
| 645 | Patient181A  | Patient207   |
| 645 | Patient192C  | Patient235A  |
| 645 | Patient217C  | Patient235E  |
| 645 | Patient217D  | Patient235E  |
| 646 | Patient053A2 | Patient081F  |
| 646 | Patient053B  | Patient081A1 |
| 646 | Patient053B  | Patient103C  |
| 646 | Patient053B  | Patient224A  |
| 646 | Patient053C  | Patient164   |
| 646 | Patient053C  | Patient192B  |
| 646 | Patient074E  | Patient150C  |
| 646 | Patient092C  | Patient176   |
| 646 | Patient103A  | Patient207   |
| 646 | Patient120B  | Patient121B  |
| 646 | Patient121A  | Patient206   |
| 646 | Patient121A  | Patient207   |
| 646 | Patient121B  | Patient126C  |
| 646 | Patient217B  | Patient235E  |
| 647 | Patient053A2 | Patient074C  |
| 647 | Patient053A2 | Patient081E  |
| 647 | Patient053B  | Patient103A  |
| 647 | Patient053B  | Patient164   |
| 647 | Patient053B  | Patient192B  |
| 647 | Patient053C  | Patient074C  |
| 647 | Patient053C  | Patient081F  |
| 647 | Patient074B  | Patient121A  |
| 647 | Patient089A2 | Patient238   |
| 647 | Patient090   | Patient195   |
| 647 | Patient092A  | Patient133   |
| 647 | Patient114   | Patient238   |
| 647 | Patient120A  | Patient123D  |
| 647 | Patient120C  | Patient121B  |

|     |              |             |
|-----|--------------|-------------|
| 647 | Patient217E  | Patient235E |
| 647 | Patient217H  | Patient235E |
| 648 | Patient022B  | Patient103A |
| 648 | Patient022B  | Patient121B |
| 648 | Patient045A  | Patient258E |
| 648 | Patient045B  | Patient258E |
| 648 | Patient053A2 | Patient230A |
| 648 | Patient053B  | Patient081F |
| 648 | Patient053C  | Patient081E |
| 648 | Patient092B  | Patient133  |
| 648 | Patient092E  | Patient133  |
| 648 | Patient103A  | Patient206  |
| 648 | Patient120D  | Patient133  |
| 648 | Patient123D  | Patient192B |
| 648 | Patient173A  | Patient195  |
| 648 | Patient217A  | Patient235E |
| 648 | Patient217F  | Patient235E |
| 648 | Patient217I  | Patient235F |
| 649 | Patient032B  | Patient120A |
| 649 | Patient053B  | Patient074C |
| 649 | Patient053B  | Patient081E |
| 649 | Patient053C  | Patient230A |
| 649 | Patient120B  | Patient133  |
| 649 | Patient121A  | Patient224B |
| 649 | Patient181A  | Patient206  |
| 649 | Patient235E  | Patient258E |
| 650 | Patient034A  | Patient120A |
| 650 | Patient053A2 | Patient103B |
| 650 | Patient053B  | Patient230A |
| 650 | Patient053C  | Patient235A |
| 650 | Patient074A  | Patient121A |
| 650 | Patient092A  | Patient103D |
| 650 | Patient092B  | Patient103D |
| 650 | Patient120C  | Patient133  |
| 650 | Patient120D  | Patient121A |
| 650 | Patient181B  | Patient207  |
| 650 | Patient207   | Patient230F |
| 651 | Patient022B  | Patient103B |
| 651 | Patient022B  | Patient181A |
| 651 | Patient034D  | Patient120A |
| 651 | Patient045C  | Patient258E |
| 651 | Patient053A2 | Patient235A |
| 651 | Patient053B  | Patient235A |
| 651 | Patient053C  | Patient103B |
| 651 | Patient086A  | Patient242  |
| 651 | Patient086C  | Patient242  |
| 651 | Patient090   | Patient230B |
| 651 | Patient092E  | Patient103D |
| 651 | Patient120A  | Patient258E |
| 651 | Patient206   | Patient230F |

|     |              |              |
|-----|--------------|--------------|
| 651 | Patient207   | Patient230E  |
| 652 | Patient034B  | Patient120A  |
| 652 | Patient053A2 | Patient181B  |
| 652 | Patient053B  | Patient103B  |
| 652 | Patient069   | Patient088   |
| 652 | Patient086B  | Patient242   |
| 652 | Patient086E  | Patient242   |
| 652 | Patient092H  | Patient133   |
| 652 | Patient120A  | Patient121A  |
| 652 | Patient120A  | Patient261A  |
| 652 | Patient120A  | Patient261B  |
| 652 | Patient121B  | Patient206   |
| 652 | Patient121B  | Patient207   |
| 652 | Patient123A  | Patient192E  |
| 652 | Patient192B  | Patient235A  |
| 652 | Patient206   | Patient230A  |
| 652 | Patient206   | Patient230D  |
| 652 | Patient207   | Patient230A  |
| 652 | Patient207   | Patient230D  |
| 652 | Patient217I  | Patient235E  |
| 653 | Patient029   | Patient058   |
| 653 | Patient029   | Patient189C1 |
| 653 | Patient034E  | Patient120A  |
| 653 | Patient053A2 | Patient074D  |
| 653 | Patient053A2 | Patient141C  |
| 653 | Patient053A2 | Patient230B  |
| 653 | Patient053C  | Patient181B  |
| 653 | Patient088   | Patient238   |
| 653 | Patient092C  | Patient164   |
| 653 | Patient121B  | Patient164   |
| 653 | Patient192D  | Patient192E  |
| 653 | Patient230D  | Patient235C  |
| 653 | Patient235A  | Patient261B  |
| 654 | Patient029   | Patient189C2 |
| 654 | Patient053A2 | Patient141B  |
| 654 | Patient053A2 | Patient230F  |
| 654 | Patient053B  | Patient181B  |
| 654 | Patient053C  | Patient074D  |
| 654 | Patient053C  | Patient141C  |
| 654 | Patient053C  | Patient230B  |
| 654 | Patient074C  | Patient121A  |
| 654 | Patient092A  | Patient103E  |
| 654 | Patient120A  | Patient121B  |
| 654 | Patient120A  | Patient141D  |
| 654 | Patient176   | Patient220B  |
| 654 | Patient181B  | Patient206   |
| 654 | Patient207   | Patient251   |
| 655 | Patient022B  | Patient181B  |
| 655 | Patient034C  | Patient120A  |
| 655 | Patient053A2 | Patient230E  |

|     |              |             |
|-----|--------------|-------------|
| 655 | Patient053B  | Patient074D |
| 655 | Patient053B  | Patient141C |
| 655 | Patient053B  | Patient230B |
| 655 | Patient053C  | Patient141B |
| 655 | Patient053C  | Patient230E |
| 655 | Patient053C  | Patient230F |
| 655 | Patient092B  | Patient103E |
| 655 | Patient092D  | Patient176  |
| 655 | Patient092E  | Patient103E |
| 655 | Patient092H  | Patient103D |
| 655 | Patient123A  | Patient192F |
| 655 | Patient173B  | Patient235A |
| 655 | Patient192E  | Patient235B |
| 655 | Patient192E  | Patient235C |
| 655 | Patient230D  | Patient235B |
| 655 | Patient235A  | Patient261A |
| 656 | Patient053A1 | Patient192E |
| 656 | Patient053B  | Patient141B |
| 656 | Patient090   | Patient235F |
| 656 | Patient092G  | Patient133  |
| 656 | Patient192F  | Patient235B |
| 656 | Patient192F  | Patient235C |
| 656 | Patient206   | Patient230E |
| 656 | Patient217J  | Patient235F |
| 657 | Patient053B  | Patient230E |
| 657 | Patient090   | Patient092C |
| 657 | Patient090   | Patient235B |
| 657 | Patient092G  | Patient103D |
| 657 | Patient120A  | Patient224A |
| 657 | Patient121A  | Patient141C |
| 657 | Patient123B  | Patient192E |
| 657 | Patient123C  | Patient192E |
| 657 | Patient192D  | Patient192F |
| 657 | Patient195   | Patient207  |
| 658 | Patient053A1 | Patient120D |
| 658 | Patient053A2 | Patient192E |
| 658 | Patient053B  | Patient230F |
| 658 | Patient074B  | Patient121B |
| 658 | Patient120A  | Patient261D |
| 658 | Patient121A  | Patient141B |
| 658 | Patient121B  | Patient224B |
| 658 | Patient126A  | Patient195  |
| 658 | Patient161B  | Patient206  |
| 658 | Patient206   | Patient251  |
| 659 | Patient026B  | Patient192A |
| 659 | Patient053A2 | Patient074E |
| 659 | Patient053A2 | Patient141A |
| 659 | Patient053C  | Patient192E |
| 659 | Patient081C  | Patient164  |
| 659 | Patient092H  | Patient103E |

|     |              |              |
|-----|--------------|--------------|
| 659 | Patient100B  | Patient238   |
| 659 | Patient123C  | Patient192F  |
| 659 | Patient145B  | Patient220B  |
| 659 | Patient161B  | Patient207   |
| 659 | Patient206   | Patient220B  |
| 659 | Patient206   | Patient230B  |
| 659 | Patient207   | Patient220B  |
| 659 | Patient207   | Patient224A  |
| 659 | Patient207   | Patient230B  |
| 660 | Patient026B  | Patient192C  |
| 660 | Patient026F  | Patient192A  |
| 660 | Patient045A  | Patient081D  |
| 660 | Patient045B  | Patient081D  |
| 660 | Patient053A1 | Patient120B  |
| 660 | Patient053B  | Patient192E  |
| 660 | Patient053C  | Patient074E  |
| 660 | Patient053C  | Patient141A  |
| 660 | Patient074D  | Patient121A  |
| 660 | Patient081D  | Patient164   |
| 660 | Patient090   | Patient192A  |
| 660 | Patient090   | Patient235E  |
| 660 | Patient103C  | Patient121A  |
| 660 | Patient123B  | Patient192F  |
| 660 | Patient176   | Patient192A  |
| 660 | Patient217J  | Patient235E  |
| 660 | Patient235A  | Patient261D  |
| 661 | Patient022B  | Patient207   |
| 661 | Patient026F  | Patient192C  |
| 661 | Patient053B  | Patient074E  |
| 661 | Patient053B  | Patient141A  |
| 661 | Patient074A  | Patient121B  |
| 661 | Patient090   | Patient120D  |
| 661 | Patient090   | Patient235C  |
| 661 | Patient092D  | Patient164   |
| 661 | Patient092G  | Patient103E  |
| 661 | Patient103D  | Patient121A  |
| 661 | Patient121A  | Patient173A  |
| 661 | Patient133   | Patient192E  |
| 661 | Patient198   | Patient208   |
| 662 | Patient045A  | Patient081C  |
| 662 | Patient045C  | Patient081D  |
| 662 | Patient053A1 | Patient120C  |
| 662 | Patient053C  | Patient192F  |
| 662 | Patient066D  | Patient121A  |
| 662 | Patient123D  | Patient192E  |
| 663 | Patient026A  | Patient192A  |
| 663 | Patient045B  | Patient081A2 |
| 663 | Patient045B  | Patient081C  |
| 663 | Patient053A1 | Patient192F  |
| 663 | Patient053A2 | Patient192F  |

|     |              |              |
|-----|--------------|--------------|
| 663 | Patient074E  | Patient121A  |
| 663 | Patient090   | Patient192C  |
| 663 | Patient103A  | Patient120A  |
| 663 | Patient121A  | Patient141A  |
| 663 | Patient133   | Patient183B  |
| 663 | Patient133   | Patient183C  |
| 663 | Patient133   | Patient192F  |
| 663 | Patient176   | Patient192C  |
| 664 | Patient022B  | Patient123A  |
| 664 | Patient026A  | Patient192C  |
| 664 | Patient026B  | Patient192B  |
| 664 | Patient032E  | Patient220B  |
| 664 | Patient045A  | Patient081A2 |
| 664 | Patient045A  | Patient081B  |
| 664 | Patient045C  | Patient081C  |
| 664 | Patient090   | Patient192B  |
| 664 | Patient164   | Patient192A  |
| 664 | Patient176   | Patient192B  |
| 664 | Patient206   | Patient224A  |
| 665 | Patient022B  | Patient123C  |
| 665 | Patient026F  | Patient192B  |
| 665 | Patient045A  | Patient081A1 |
| 665 | Patient045B  | Patient081B  |
| 665 | Patient053B  | Patient192F  |
| 665 | Patient069   | Patient171   |
| 665 | Patient074C  | Patient121B  |
| 665 | Patient090   | Patient120B  |
| 665 | Patient092A  | Patient176   |
| 665 | Patient103C  | Patient207   |
| 665 | Patient103E  | Patient121A  |
| 665 | Patient123D  | Patient192F  |
| 666 | Patient022B  | Patient123B  |
| 666 | Patient032C  | Patient220B  |
| 666 | Patient045B  | Patient081A1 |
| 666 | Patient053A2 | Patient120D  |
| 666 | Patient053C  | Patient120D  |
| 666 | Patient121B  | Patient141C  |
| 666 | Patient164   | Patient192C  |
| 666 | Patient192E  | Patient235A  |
| 667 | Patient045C  | Patient081A2 |
| 667 | Patient045C  | Patient081B  |
| 667 | Patient053B  | Patient120D  |
| 667 | Patient081A1 | Patient121A  |
| 667 | Patient081A2 | Patient121A  |
| 667 | Patient081B  | Patient121A  |
| 667 | Patient092B  | Patient176   |
| 667 | Patient092E  | Patient176   |
| 667 | Patient103B  | Patient121A  |
| 667 | Patient103C  | Patient206   |
| 667 | Patient120A  | Patient224B  |

|     |              |              |
|-----|--------------|--------------|
| 667 | Patient121A  | Patient181A  |
| 667 | Patient121A  | Patient230A  |
| 667 | Patient121A  | Patient235C  |
| 667 | Patient121B  | Patient173A  |
| 667 | Patient164   | Patient192B  |
| 668 | Patient045A  | Patient081F  |
| 668 | Patient045C  | Patient081A1 |
| 668 | Patient066E  | Patient121A  |
| 668 | Patient090   | Patient120C  |
| 668 | Patient121A  | Patient235B  |
| 668 | Patient133   | Patient183D  |
| 668 | Patient133   | Patient183E  |
| 668 | Patient192F  | Patient235A  |
| 669 | Patient026A  | Patient192B  |
| 669 | Patient045A  | Patient066D  |
| 669 | Patient045A  | Patient081E  |
| 669 | Patient045B  | Patient081F  |
| 669 | Patient045C  | Patient081F  |
| 669 | Patient053A2 | Patient120B  |
| 669 | Patient053C  | Patient120B  |
| 669 | Patient081A1 | Patient164   |
| 669 | Patient081B  | Patient164   |
| 669 | Patient103B  | Patient207   |
| 669 | Patient121B  | Patient141B  |
| 669 | Patient133   | Patient183A  |
| 669 | Patient164   | Patient183B  |
| 670 | Patient022B  | Patient086C  |
| 670 | Patient045B  | Patient066D  |
| 670 | Patient053A2 | Patient120C  |
| 670 | Patient053B  | Patient120B  |
| 670 | Patient053C  | Patient120C  |
| 670 | Patient081A2 | Patient164   |
| 670 | Patient090   | Patient092D  |
| 670 | Patient103B  | Patient206   |
| 670 | Patient121B  | Patient173B  |
| 670 | Patient164   | Patient183C  |
| 670 | Patient167   | Patient220B  |
| 671 | Patient045B  | Patient081E  |
| 671 | Patient045C  | Patient066D  |
| 671 | Patient053A1 | Patient120A  |
| 671 | Patient053A2 | Patient173A  |
| 671 | Patient053B  | Patient120C  |
| 671 | Patient053C  | Patient173A  |
| 671 | Patient066F  | Patient121A  |
| 671 | Patient074D  | Patient121B  |
| 671 | Patient081E  | Patient121A  |
| 671 | Patient086C  | Patient220B  |
| 671 | Patient090   | Patient092A  |
| 671 | Patient092A  | Patient164   |
| 671 | Patient092E  | Patient164   |

|     |              |             |
|-----|--------------|-------------|
| 671 | Patient103C  | Patient121B |
| 672 | Patient022B  | Patient123D |
| 672 | Patient081E  | Patient164  |
| 672 | Patient086A  | Patient220B |
| 672 | Patient090   | Patient092B |
| 672 | Patient092H  | Patient176  |
| 672 | Patient103D  | Patient121B |
| 672 | Patient121B  | Patient141A |
| 673 | Patient022B  | Patient086A |
| 673 | Patient045A  | Patient066E |
| 673 | Patient045C  | Patient081E |
| 673 | Patient053B  | Patient173A |
| 673 | Patient074E  | Patient121B |
| 673 | Patient090   | Patient092E |
| 673 | Patient092B  | Patient164  |
| 673 | Patient121A  | Patient230E |
| 673 | Patient121A  | Patient230F |
| 674 | Patient022B  | Patient086B |
| 674 | Patient026B  | Patient120D |
| 674 | Patient045A  | Patient224A |
| 674 | Patient066D  | Patient121B |
| 674 | Patient081F  | Patient121A |
| 674 | Patient164   | Patient183E |
| 675 | Patient026F  | Patient120D |
| 675 | Patient045A  | Patient066F |
| 675 | Patient045C  | Patient066E |
| 675 | Patient053A2 | Patient173B |
| 675 | Patient053C  | Patient173B |
| 675 | Patient081F  | Patient164  |
| 675 | Patient086B  | Patient220B |
| 675 | Patient086E  | Patient220B |
| 675 | Patient092G  | Patient176  |
| 675 | Patient123A  | Patient206  |
| 675 | Patient123A  | Patient207  |
| 675 | Patient164   | Patient183A |
| 675 | Patient164   | Patient183D |
| 676 | Patient022B  | Patient086E |
| 676 | Patient022B  | Patient150A |
| 676 | Patient022B  | Patient150B |
| 676 | Patient022B  | Patient150C |
| 676 | Patient045B  | Patient066E |
| 676 | Patient045B  | Patient066F |
| 676 | Patient045B  | Patient224A |
| 676 | Patient045C  | Patient066F |
| 676 | Patient090   | Patient242  |
| 676 | Patient103E  | Patient121B |
| 676 | Patient121A  | Patient181B |
| 676 | Patient121B  | Patient181A |
| 676 | Patient176   | Patient183B |
| 677 | Patient053B  | Patient173B |



|     |              |             |
|-----|--------------|-------------|
| 677 | Patient092H  | Patient164  |
| 677 | Patient103B  | Patient121B |
| 677 | Patient121A  | Patient224A |
| 677 | Patient121A  | Patient230B |
| 677 | Patient173A  | Patient176  |
| 677 | Patient176   | Patient183C |
| 677 | Patient220B  | Patient230G |
| 678 | Patient026B  | Patient120B |
| 678 | Patient045A  | Patient161B |
| 678 | Patient045B  | Patient074B |
| 678 | Patient045C  | Patient224A |
| 678 | Patient090   | Patient092H |
| 678 | Patient121B  | Patient230A |
| 678 | Patient121B  | Patient235C |
| 679 | Patient022B  | Patient092G |
| 679 | Patient026B  | Patient192E |
| 679 | Patient026F  | Patient120B |
| 679 | Patient026F  | Patient192E |
| 679 | Patient029   | Patient100B |
| 679 | Patient045A  | Patient074B |
| 679 | Patient045B  | Patient161B |
| 679 | Patient120A  | Patient141C |
| 679 | Patient120A  | Patient176  |
| 679 | Patient120A  | Patient230A |
| 679 | Patient121B  | Patient235B |
| 679 | Patient123C  | Patient206  |
| 679 | Patient123C  | Patient207  |
| 679 | Patient141G  | Patient220B |
| 679 | Patient220B  | Patient261E |
| 680 | Patient026B  | Patient120C |
| 680 | Patient066E  | Patient121B |
| 680 | Patient081A1 | Patient121B |
| 680 | Patient081A2 | Patient121B |
| 680 | Patient081B  | Patient121B |
| 680 | Patient120A  | Patient230F |
| 680 | Patient123B  | Patient206  |
| 680 | Patient123B  | Patient207  |
| 680 | Patient126C  | Patient235A |
| 680 | Patient171   | Patient179  |
| 680 | Patient183B  | Patient206  |
| 680 | Patient183C  | Patient206  |
| 680 | Patient220B  | Patient230C |
| 681 | Patient026F  | Patient120C |
| 681 | Patient045A  | Patient126A |
| 681 | Patient045B  | Patient074A |
| 681 | Patient045C  | Patient161B |
| 681 | Patient090   | Patient092G |
| 681 | Patient090   | Patient192E |
| 681 | Patient092G  | Patient164  |
| 681 | Patient176   | Patient183E |

|     |             |             |
|-----|-------------|-------------|
| 681 | Patient176  | Patient192E |
| 681 | Patient183C | Patient207  |
| 681 | Patient220B | Patient261C |
| 682 | Patient026B | Patient192F |
| 682 | Patient045A | Patient074A |
| 682 | Patient045B | Patient126A |
| 682 | Patient045C | Patient074B |
| 682 | Patient145C | Patient220B |
| 682 | Patient176  | Patient183A |
| 682 | Patient176  | Patient183D |
| 682 | Patient183B | Patient207  |
| 683 | Patient022B | Patient173B |
| 683 | Patient026A | Patient192E |
| 683 | Patient026D | Patient206  |
| 683 | Patient026F | Patient192F |
| 683 | Patient045A | Patient103C |
| 683 | Patient045A | Patient126C |
| 683 | Patient045B | Patient126C |
| 683 | Patient045C | Patient074A |
| 683 | Patient066F | Patient121B |
| 683 | Patient081E | Patient121B |
| 683 | Patient121B | Patient230E |
| 684 | Patient022B | Patient192D |
| 684 | Patient045B | Patient103C |
| 684 | Patient045C | Patient103C |
| 684 | Patient045C | Patient126A |
| 684 | Patient045C | Patient126C |
| 684 | Patient074A | Patient120A |
| 684 | Patient074B | Patient120A |
| 684 | Patient090  | Patient192F |
| 684 | Patient092C | Patient261B |
| 684 | Patient120A | Patient141B |
| 684 | Patient121B | Patient230F |
| 684 | Patient164  | Patient192E |
| 684 | Patient176  | Patient192F |
| 684 | Patient192D | Patient195  |
| 685 | Patient022B | Patient026D |
| 685 | Patient026C | Patient192A |
| 685 | Patient026D | Patient207  |
| 685 | Patient045A | Patient074C |
| 685 | Patient045B | Patient074C |
| 685 | Patient121B | Patient181B |
| 685 | Patient123D | Patient206  |
| 685 | Patient123D | Patient207  |
| 685 | Patient133  | Patient242  |
| 685 | Patient141F | Patient220B |
| 685 | Patient183A | Patient206  |
| 685 | Patient183D | Patient206  |
| 685 | Patient183D | Patient207  |
| 686 | Patient045A | Patient103B |

|     |             |             |
|-----|-------------|-------------|
| 686 | Patient086C | Patient145B |
| 686 | Patient086C | Patient241  |
| 686 | Patient092D | Patient261B |
| 686 | Patient120A | Patient141A |
| 686 | Patient120A | Patient230B |
| 686 | Patient121B | Patient224A |
| 686 | Patient145C | Patient235F |
| 686 | Patient183A | Patient207  |
| 686 | Patient183E | Patient206  |
| 687 | Patient026C | Patient192C |
| 687 | Patient032D | Patient220B |
| 687 | Patient045C | Patient074C |
| 687 | Patient081F | Patient121B |
| 687 | Patient086A | Patient145B |
| 687 | Patient086A | Patient241  |
| 687 | Patient092C | Patient261A |
| 687 | Patient126A | Patient176  |
| 687 | Patient183E | Patient207  |
| 687 | Patient192A | Patient217D |
| 688 | Patient026A | Patient192F |
| 688 | Patient045B | Patient103B |
| 688 | Patient074C | Patient120A |
| 688 | Patient086B | Patient145B |
| 688 | Patient086B | Patient241  |
| 688 | Patient086E | Patient145B |
| 688 | Patient086E | Patient241  |
| 688 | Patient121B | Patient230B |
| 688 | Patient164  | Patient192F |
| 688 | Patient192A | Patient217B |
| 688 | Patient192A | Patient217C |
| 689 | Patient120A | Patient230E |
| 689 | Patient126A | Patient207  |
| 689 | Patient192C | Patient217D |
| 690 | Patient022B | Patient045A |
| 690 | Patient026E | Patient206  |
| 690 | Patient045C | Patient103B |
| 690 | Patient066D | Patient120A |
| 690 | Patient092C | Patient261D |
| 690 | Patient126C | Patient206  |
| 690 | Patient126C | Patient207  |
| 690 | Patient145C | Patient235E |
| 690 | Patient192A | Patient217A |
| 690 | Patient192C | Patient217B |
| 690 | Patient192C | Patient217C |
| 690 | Patient220B | Patient261G |
| 691 | Patient026C | Patient120B |
| 691 | Patient026C | Patient192B |
| 691 | Patient045A | Patient074D |
| 691 | Patient045B | Patient074D |
| 691 | Patient066D | Patient235F |

|     |             |             |
|-----|-------------|-------------|
| 691 | Patient092D | Patient261A |
| 691 | Patient092G | Patient207  |
| 691 | Patient192A | Patient217E |
| 691 | Patient192A | Patient217H |
| 692 | Patient022B | Patient045C |
| 692 | Patient026C | Patient120D |
| 692 | Patient026E | Patient207  |
| 692 | Patient032A | Patient220B |
| 692 | Patient045A | Patient224B |
| 692 | Patient069  | Patient180  |
| 692 | Patient192A | Patient217F |
| 692 | Patient192A | Patient258E |
| 692 | Patient192C | Patient217A |
| 693 | Patient022B | Patient045B |
| 693 | Patient032D | Patient235F |
| 693 | Patient045B | Patient181A |
| 693 | Patient045B | Patient224B |
| 693 | Patient092A | Patient261B |
| 693 | Patient092D | Patient261D |
| 693 | Patient120D | Patient235F |
| 693 | Patient126A | Patient206  |
| 693 | Patient192B | Patient217D |
| 693 | Patient192C | Patient217E |
| 693 | Patient192C | Patient217H |
| 694 | Patient026C | Patient120C |
| 694 | Patient029  | Patient238  |
| 694 | Patient034A | Patient220B |
| 694 | Patient045A | Patient181A |
| 694 | Patient045A | Patient206  |
| 694 | Patient045A | Patient207  |
| 694 | Patient045C | Patient224B |
| 694 | Patient081B | Patient235F |
| 694 | Patient092G | Patient206  |
| 694 | Patient192B | Patient217B |
| 694 | Patient192B | Patient217C |
| 694 | Patient192C | Patient217F |
| 694 | Patient192C | Patient258E |
| 695 | Patient022B | Patient026E |
| 695 | Patient026A | Patient120D |
| 695 | Patient029  | Patient193  |
| 695 | Patient032B | Patient220B |
| 695 | Patient034B | Patient220B |
| 695 | Patient045A | Patient141B |
| 695 | Patient045C | Patient074D |
| 695 | Patient066D | Patient235E |
| 695 | Patient092E | Patient261B |
| 695 | Patient145A | Patient220B |
| 696 | Patient022B | Patient026B |
| 696 | Patient022B | Patient026F |
| 696 | Patient032E | Patient086C |

|     |              |             |
|-----|--------------|-------------|
| 696 | Patient045A  | Patient074E |
| 696 | Patient045A  | Patient141C |
| 696 | Patient045B  | Patient074E |
| 696 | Patient045B  | Patient141B |
| 696 | Patient066E  | Patient120A |
| 696 | Patient066E  | Patient235F |
| 696 | Patient066F  | Patient120A |
| 696 | Patient074D  | Patient120A |
| 696 | Patient092A  | Patient261A |
| 696 | Patient092B  | Patient261B |
| 696 | Patient120D  | Patient145C |
| 696 | Patient141C  | Patient235A |
| 696 | Patient145C  | Patient235C |
| 696 | Patient192B  | Patient217A |
| 697 | Patient022B  | Patient126C |
| 697 | Patient026A  | Patient120B |
| 697 | Patient032D  | Patient235E |
| 697 | Patient034E  | Patient220B |
| 697 | Patient045B  | Patient206  |
| 697 | Patient045B  | Patient207  |
| 697 | Patient045C  | Patient181A |
| 697 | Patient120B  | Patient235F |
| 697 | Patient120D  | Patient235E |
| 697 | Patient121A  | Patient173B |
| 697 | Patient145C  | Patient235B |
| 697 | Patient192B  | Patient217E |
| 697 | Patient192B  | Patient217F |
| 697 | Patient192B  | Patient217H |
| 698 | Patient032A  | Patient235F |
| 698 | Patient034D  | Patient220B |
| 698 | Patient045B  | Patient141C |
| 698 | Patient045C  | Patient141B |
| 698 | Patient045C  | Patient141C |
| 698 | Patient081A1 | Patient235F |
| 698 | Patient081B  | Patient235E |
| 698 | Patient092B  | Patient261A |
| 698 | Patient092E  | Patient261A |
| 698 | Patient141B  | Patient235A |
| 699 | Patient022B  | Patient026A |
| 699 | Patient026A  | Patient120C |
| 699 | Patient045A  | Patient173A |
| 699 | Patient045C  | Patient206  |
| 699 | Patient045C  | Patient207  |
| 699 | Patient053A2 | Patient261B |
| 699 | Patient053C  | Patient261B |
| 699 | Patient081A2 | Patient235F |
| 699 | Patient092H  | Patient261B |
| 699 | Patient120B  | Patient145C |
| 699 | Patient120C  | Patient235F |
| 699 | Patient150A  | Patient207  |

|     |              |             |
|-----|--------------|-------------|
| 699 | Patient177   | Patient207  |
| 699 | Patient192A  | Patient217I |
| 699 | Patient192B  | Patient258E |
| 700 | Patient029   | Patient114  |
| 700 | Patient032E  | Patient086A |
| 700 | Patient045C  | Patient074E |
| 700 | Patient066E  | Patient235E |
| 700 | Patient066F  | Patient235F |
| 700 | Patient081E  | Patient235F |
| 700 | Patient081F  | Patient235F |
| 700 | Patient120C  | Patient145C |
| 700 | Patient145A  | Patient235F |
| 700 | Patient150A  | Patient206  |
| 700 | Patient192C  | Patient217I |
| 701 | Patient032C  | Patient086C |
| 701 | Patient032E  | Patient086B |
| 701 | Patient032E  | Patient086E |
| 701 | Patient045B  | Patient173A |
| 701 | Patient053B  | Patient261B |
| 701 | Patient058   | Patient179  |
| 701 | Patient074B  | Patient207  |
| 701 | Patient074E  | Patient120A |
| 701 | Patient092G  | Patient261B |
| 701 | Patient120B  | Patient235E |
| 701 | Patient150B  | Patient207  |
| 701 | Patient192A  | Patient217J |
| 702 | Patient032A  | Patient235E |
| 702 | Patient034C  | Patient220B |
| 702 | Patient045A  | Patient141A |
| 702 | Patient045A  | Patient181B |
| 702 | Patient045B  | Patient181B |
| 702 | Patient053A2 | Patient261A |
| 702 | Patient053C  | Patient261A |
| 702 | Patient081A1 | Patient235E |
| 702 | Patient090   | Patient103D |
| 702 | Patient092A  | Patient261D |
| 702 | Patient092H  | Patient261A |
| 702 | Patient121A  | Patient235A |
| 702 | Patient141A  | Patient235A |
| 702 | Patient150B  | Patient206  |
| 702 | Patient171   | Patient180  |
| 702 | Patient176   | Patient213A |
| 703 | Patient032D  | Patient235C |
| 703 | Patient045A  | Patient173B |
| 703 | Patient045B  | Patient141A |
| 703 | Patient045C  | Patient173A |
| 703 | Patient074A  | Patient207  |
| 703 | Patient081A2 | Patient235E |
| 703 | Patient090   | Patient241  |
| 703 | Patient092B  | Patient261D |

|     |             |             |
|-----|-------------|-------------|
| 703 | Patient092E | Patient261D |
| 703 | Patient120C | Patient235E |
| 703 | Patient177  | Patient206  |
| 703 | Patient192C | Patient217J |
| 704 | Patient032D | Patient235B |
| 704 | Patient034A | Patient235F |
| 704 | Patient045B | Patient173B |
| 704 | Patient053B | Patient261A |
| 704 | Patient066D | Patient235A |
| 704 | Patient066F | Patient235E |
| 704 | Patient081D | Patient086C |
| 704 | Patient081E | Patient235E |
| 704 | Patient081F | Patient235E |
| 704 | Patient092G | Patient261A |
| 704 | Patient145A | Patient235E |
| 704 | Patient220B | Patient261B |
| 705 | Patient026C | Patient192E |
| 705 | Patient032B | Patient235F |
| 705 | Patient034E | Patient235F |
| 705 | Patient045C | Patient141A |
| 705 | Patient074B | Patient206  |
| 705 | Patient086C | Patient230G |
| 705 | Patient126C | Patient235F |
| 705 | Patient141D | Patient220B |
| 705 | Patient150C | Patient206  |
| 705 | Patient164  | Patient181A |
| 705 | Patient173A | Patient207  |
| 705 | Patient192B | Patient217I |
| 705 | Patient220B | Patient261A |
| 706 | Patient034B | Patient235F |
| 706 | Patient045C | Patient181B |
| 706 | Patient074A | Patient206  |
| 706 | Patient074C | Patient207  |
| 706 | Patient081C | Patient086C |
| 706 | Patient086A | Patient230G |
| 706 | Patient090  | Patient103E |
| 706 | Patient150C | Patient207  |
| 706 | Patient192B | Patient217J |
| 707 | Patient032A | Patient235B |
| 707 | Patient032C | Patient086A |
| 707 | Patient034D | Patient235F |
| 707 | Patient045A | Patient230F |
| 707 | Patient045C | Patient173B |
| 707 | Patient092H | Patient261D |
| 707 | Patient192E | Patient217D |
| 707 | Patient195  | Patient213A |
| 708 | Patient026C | Patient192F |
| 708 | Patient026F | Patient206  |
| 708 | Patient034A | Patient235E |
| 708 | Patient045A | Patient230A |

|     |              |             |
|-----|--------------|-------------|
| 708 | Patient045A  | Patient230E |
| 708 | Patient053A2 | Patient261D |
| 708 | Patient053C  | Patient261D |
| 708 | Patient081C  | Patient086A |
| 708 | Patient081D  | Patient086A |
| 708 | Patient141D  | Patient235F |
| 708 | Patient173B  | Patient206  |
| 708 | Patient173B  | Patient207  |
| 708 | Patient192E  | Patient217B |
| 708 | Patient192E  | Patient217C |
| 708 | Patient220B  | Patient261D |
| 709 | Patient032A  | Patient235C |
| 709 | Patient032B  | Patient235E |
| 709 | Patient032D  | Patient120D |
| 709 | Patient034E  | Patient235E |
| 709 | Patient045A  | Patient230D |
| 709 | Patient045B  | Patient230A |
| 709 | Patient045B  | Patient230F |
| 709 | Patient053A2 | Patient120A |
| 709 | Patient053A2 | Patient195  |
| 709 | Patient053C  | Patient120A |
| 709 | Patient066D  | Patient164  |
| 709 | Patient086B  | Patient230G |
| 709 | Patient086E  | Patient230G |
| 709 | Patient092G  | Patient261D |
| 709 | Patient121B  | Patient235A |
| 709 | Patient126C  | Patient235E |
| 709 | Patient141C  | Patient235F |
| 709 | Patient164   | Patient224B |
| 709 | Patient173A  | Patient206  |
| 709 | Patient176   | Patient177  |
| 710 | Patient026F  | Patient207  |
| 710 | Patient032C  | Patient086B |
| 710 | Patient032C  | Patient086E |
| 710 | Patient034B  | Patient235E |
| 710 | Patient045B  | Patient230D |
| 710 | Patient045B  | Patient230E |
| 710 | Patient045C  | Patient230E |
| 710 | Patient045C  | Patient230F |
| 710 | Patient053B  | Patient261D |
| 710 | Patient053C  | Patient195  |
| 710 | Patient074C  | Patient206  |
| 710 | Patient081C  | Patient086B |
| 710 | Patient081C  | Patient086E |
| 710 | Patient081D  | Patient086B |
| 710 | Patient081D  | Patient086E |
| 710 | Patient086C  | Patient261E |
| 710 | Patient120D  | Patient145A |
| 710 | Patient141B  | Patient235F |
| 710 | Patient145A  | Patient235C |



|     |              |              |
|-----|--------------|--------------|
| 710 | Patient176   | Patient235F  |
| 710 | Patient192E  | Patient217A  |
| 711 | Patient026A  | Patient206   |
| 711 | Patient026B  | Patient206   |
| 711 | Patient032D  | Patient120B  |
| 711 | Patient034C  | Patient235F  |
| 711 | Patient034D  | Patient235E  |
| 711 | Patient045C  | Patient230A  |
| 711 | Patient045C  | Patient230D  |
| 711 | Patient053B  | Patient120A  |
| 711 | Patient053B  | Patient195   |
| 711 | Patient066E  | Patient235A  |
| 711 | Patient086A  | Patient261E  |
| 711 | Patient086C  | Patient230C  |
| 711 | Patient086C  | Patient261C  |
| 711 | Patient145A  | Patient235B  |
| 711 | Patient176   | Patient235B  |
| 711 | Patient176   | Patient235C  |
| 711 | Patient192E  | Patient217E  |
| 711 | Patient192E  | Patient217F  |
| 711 | Patient192E  | Patient217H  |
| 711 | Patient207   | Patient242   |
| 712 | Patient026B  | Patient120A  |
| 712 | Patient032D  | Patient120C  |
| 712 | Patient053A2 | Patient103D  |
| 712 | Patient086A  | Patient141G  |
| 712 | Patient086A  | Patient230C  |
| 712 | Patient086A  | Patient261C  |
| 712 | Patient086B  | Patient261E  |
| 712 | Patient086C  | Patient141G  |
| 712 | Patient086E  | Patient261E  |
| 712 | Patient103A  | Patient235A  |
| 712 | Patient120B  | Patient145A  |
| 712 | Patient133   | Patient241   |
| 712 | Patient141C  | Patient164   |
| 712 | Patient141D  | Patient235E  |
| 712 | Patient164   | Patient181B  |
| 712 | Patient192F  | Patient217C  |
| 712 | Patient192F  | Patient217D  |
| 712 | Patient207   | Patient213A  |
| 713 | Patient022B  | Patient053A2 |
| 713 | Patient022B  | Patient053C  |
| 713 | Patient026A  | Patient207   |
| 713 | Patient026B  | Patient207   |
| 713 | Patient026F  | Patient120A  |
| 713 | Patient032A  | Patient120B  |
| 713 | Patient032A  | Patient120D  |
| 713 | Patient053C  | Patient103D  |
| 713 | Patient066F  | Patient235A  |
| 713 | Patient074A  | Patient090   |

|     |              |             |
|-----|--------------|-------------|
| 713 | Patient074B  | Patient090  |
| 713 | Patient074D  | Patient207  |
| 713 | Patient086B  | Patient141G |
| 713 | Patient086B  | Patient230C |
| 713 | Patient086E  | Patient141G |
| 713 | Patient086E  | Patient230C |
| 713 | Patient103D  | Patient207  |
| 713 | Patient120C  | Patient145A |
| 713 | Patient141C  | Patient235E |
| 713 | Patient192E  | Patient258E |
| 713 | Patient192F  | Patient217B |
| 713 | Patient206   | Patient235A |
| 714 | Patient022B  | Patient053B |
| 714 | Patient022B  | Patient103D |
| 714 | Patient032A  | Patient120C |
| 714 | Patient032B  | Patient235B |
| 714 | Patient034A  | Patient235C |
| 714 | Patient053B  | Patient103D |
| 714 | Patient066E  | Patient164  |
| 714 | Patient079C  | Patient210  |
| 714 | Patient086B  | Patient261C |
| 714 | Patient086E  | Patient261C |
| 714 | Patient141B  | Patient164  |
| 714 | Patient141B  | Patient235E |
| 714 | Patient176   | Patient235E |
| 715 | Patient026A  | Patient235A |
| 715 | Patient032B  | Patient235C |
| 715 | Patient034A  | Patient235B |
| 715 | Patient034C  | Patient235E |
| 715 | Patient034E  | Patient235C |
| 715 | Patient053A2 | Patient103E |
| 715 | Patient058   | Patient180  |
| 715 | Patient079B  | Patient210  |
| 715 | Patient103D  | Patient206  |
| 715 | Patient141A  | Patient235F |
| 715 | Patient192F  | Patient217A |
| 715 | Patient192F  | Patient217E |
| 715 | Patient192F  | Patient217F |
| 716 | Patient022B  | Patient235A |
| 716 | Patient034B  | Patient235B |
| 716 | Patient034B  | Patient235C |
| 716 | Patient034D  | Patient235B |
| 716 | Patient034E  | Patient235B |
| 716 | Patient045A  | Patient230B |
| 716 | Patient053C  | Patient103E |
| 716 | Patient074D  | Patient206  |
| 716 | Patient079A1 | Patient210  |
| 716 | Patient079A2 | Patient210  |
| 716 | Patient192F  | Patient217H |
| 716 | Patient230A  | Patient235A |

|     |              |             |
|-----|--------------|-------------|
| 717 | Patient022B  | Patient074A |
| 717 | Patient034D  | Patient235C |
| 717 | Patient045B  | Patient230B |
| 717 | Patient053B  | Patient103E |
| 717 | Patient066F  | Patient164  |
| 717 | Patient086A  | Patient141F |
| 717 | Patient086C  | Patient141F |
| 717 | Patient103E  | Patient207  |
| 717 | Patient206   | Patient213A |
| 718 | Patient022B  | Patient074B |
| 718 | Patient034A  | Patient120D |
| 718 | Patient074C  | Patient090  |
| 718 | Patient103A  | Patient220B |
| 718 | Patient141A  | Patient164  |
| 718 | Patient141D  | Patient235C |
| 718 | Patient192F  | Patient258E |
| 719 | Patient026C  | Patient235A |
| 719 | Patient032B  | Patient120B |
| 719 | Patient032B  | Patient120D |
| 719 | Patient045C  | Patient230B |
| 719 | Patient086B  | Patient141F |
| 719 | Patient086E  | Patient141F |
| 719 | Patient093B  | Patient210  |
| 719 | Patient103E  | Patient206  |
| 719 | Patient108B2 | Patient210  |
| 719 | Patient141A  | Patient235E |
| 719 | Patient141D  | Patient235B |
| 719 | Patient192E  | Patient217I |
| 719 | Patient242   | Patient251  |
| 720 | Patient022B  | Patient103E |
| 720 | Patient026C  | Patient120A |
| 720 | Patient032B  | Patient120C |
| 720 | Patient034A  | Patient120B |
| 720 | Patient034B  | Patient120D |
| 720 | Patient034C  | Patient235B |
| 720 | Patient053A2 | Patient206  |
| 720 | Patient053A2 | Patient207  |
| 720 | Patient074E  | Patient207  |
| 720 | Patient086C  | Patient261G |
| 720 | Patient120D  | Patient141D |
| 720 | Patient120D  | Patient261B |
| 720 | Patient192E  | Patient217J |
| 720 | Patient210   | Patient213B |
| 720 | Patient230F  | Patient235A |
| 721 | Patient022B  | Patient074C |
| 721 | Patient034A  | Patient120C |
| 721 | Patient034B  | Patient120B |
| 721 | Patient034C  | Patient235C |
| 721 | Patient034D  | Patient120D |
| 721 | Patient034E  | Patient120D |

|     |              |              |
|-----|--------------|--------------|
| 721 | Patient053C  | Patient206   |
| 721 | Patient053C  | Patient207   |
| 721 | Patient086A  | Patient261G  |
| 721 | Patient093C  | Patient210   |
| 721 | Patient108B1 | Patient210   |
| 721 | Patient120D  | Patient261A  |
| 721 | Patient230B  | Patient235A  |
| 721 | Patient230E  | Patient235A  |
| 722 | Patient034B  | Patient120C  |
| 722 | Patient053B  | Patient206   |
| 722 | Patient053B  | Patient207   |
| 722 | Patient074E  | Patient206   |
| 722 | Patient086B  | Patient261G  |
| 722 | Patient086E  | Patient261G  |
| 722 | Patient120B  | Patient141D  |
| 722 | Patient120B  | Patient261B  |
| 722 | Patient120C  | Patient261B  |
| 723 | Patient022B  | Patient092C  |
| 723 | Patient034D  | Patient120B  |
| 723 | Patient034E  | Patient120B  |
| 723 | Patient120C  | Patient141D  |
| 723 | Patient164   | Patient230E  |
| 723 | Patient224A  | Patient235A  |
| 723 | Patient230A  | Patient235F  |
| 724 | Patient029   | Patient089A1 |
| 724 | Patient034D  | Patient120C  |
| 724 | Patient034E  | Patient120C  |
| 724 | Patient045B  | Patient195   |
| 724 | Patient074D  | Patient090   |
| 724 | Patient108A  | Patient210   |
| 724 | Patient164   | Patient230F  |
| 724 | Patient192F  | Patient217I  |
| 724 | Patient192F  | Patient217J  |
| 724 | Patient217C  | Patient235A  |
| 725 | Patient034C  | Patient120B  |
| 725 | Patient034C  | Patient120C  |
| 725 | Patient034C  | Patient120D  |
| 725 | Patient045A  | Patient195   |
| 725 | Patient094A  | Patient210   |
| 725 | Patient120B  | Patient261A  |
| 725 | Patient120C  | Patient261A  |
| 725 | Patient164   | Patient213A  |
| 725 | Patient164   | Patient230A  |
| 725 | Patient217D  | Patient235A  |
| 726 | Patient045C  | Patient195   |
| 726 | Patient074B  | Patient164   |
| 726 | Patient081B  | Patient235A  |
| 726 | Patient093A  | Patient210   |
| 726 | Patient120D  | Patient261D  |
| 726 | Patient217B  | Patient235A  |

|     |              |              |
|-----|--------------|--------------|
| 727 | Patient029   | Patient089A2 |
| 727 | Patient093D  | Patient210   |
| 727 | Patient093E  | Patient210   |
| 727 | Patient108D  | Patient210   |
| 727 | Patient120A  | Patient181A  |
| 727 | Patient127A  | Patient210   |
| 727 | Patient217E  | Patient235A  |
| 727 | Patient217H  | Patient235A  |
| 727 | Patient230A  | Patient235E  |
| 728 | Patient109A  | Patient210   |
| 728 | Patient120A  | Patient173A  |
| 728 | Patient173B  | Patient235F  |
| 728 | Patient217A  | Patient235A  |
| 728 | Patient217F  | Patient235A  |
| 728 | Patient230B  | Patient235F  |
| 728 | Patient230F  | Patient235F  |
| 729 | Patient022B  | Patient074D  |
| 729 | Patient074A  | Patient164   |
| 729 | Patient081A1 | Patient235A  |
| 729 | Patient086C  | Patient183C  |
| 729 | Patient094C  | Patient210   |
| 729 | Patient094D  | Patient210   |
| 729 | Patient108H  | Patient210   |
| 729 | Patient120A  | Patient173B  |
| 729 | Patient120D  | Patient217C  |
| 729 | Patient210   | Patient236B  |
| 729 | Patient230E  | Patient235F  |
| 730 | Patient032D  | Patient242   |
| 730 | Patient081A2 | Patient235A  |
| 730 | Patient081F  | Patient235A  |
| 730 | Patient086A  | Patient183C  |
| 730 | Patient086C  | Patient183B  |
| 730 | Patient094B  | Patient210   |
| 730 | Patient120B  | Patient261D  |
| 730 | Patient120C  | Patient261D  |
| 730 | Patient164   | Patient230B  |
| 730 | Patient164   | Patient230D  |
| 730 | Patient207   | Patient235F  |
| 731 | Patient081E  | Patient235A  |
| 731 | Patient086A  | Patient183B  |
| 731 | Patient086C  | Patient230D  |
| 731 | Patient092C  | Patient206   |
| 731 | Patient108G  | Patient210   |
| 731 | Patient109B  | Patient210   |
| 731 | Patient109C  | Patient210   |
| 731 | Patient120D  | Patient217D  |
| 731 | Patient127B  | Patient210   |
| 731 | Patient173A  | Patient235A  |
| 732 | Patient026A  | Patient120A  |
| 732 | Patient074E  | Patient090   |

|     |              |             |
|-----|--------------|-------------|
| 732 | Patient086A  | Patient230D |
| 732 | Patient086B  | Patient183B |
| 732 | Patient086E  | Patient183B |
| 732 | Patient092C  | Patient207  |
| 732 | Patient103A  | Patient120D |
| 732 | Patient103D  | Patient120A |
| 732 | Patient120B  | Patient217C |
| 732 | Patient120D  | Patient217B |
| 732 | Patient120D  | Patient217E |
| 732 | Patient120D  | Patient217F |
| 732 | Patient126D  | Patient210  |
| 732 | Patient145C  | Patient192A |
| 732 | Patient167   | Patient242  |
| 732 | Patient173B  | Patient235E |
| 732 | Patient230B  | Patient235E |
| 733 | Patient022B  | Patient092D |
| 733 | Patient074C  | Patient164  |
| 733 | Patient086B  | Patient183C |
| 733 | Patient086B  | Patient230D |
| 733 | Patient086E  | Patient183C |
| 733 | Patient086E  | Patient230D |
| 733 | Patient103A  | Patient120C |
| 733 | Patient109D  | Patient210  |
| 733 | Patient109E  | Patient210  |
| 733 | Patient120B  | Patient217D |
| 733 | Patient120C  | Patient217C |
| 733 | Patient120D  | Patient217A |
| 733 | Patient120D  | Patient217H |
| 733 | Patient184   | Patient210  |
| 733 | Patient230E  | Patient235E |
| 733 | Patient230F  | Patient235E |
| 734 | Patient021A1 | Patient210  |
| 734 | Patient026B  | Patient235A |
| 734 | Patient029   | Patient088  |
| 734 | Patient094E  | Patient210  |
| 734 | Patient103A  | Patient120B |
| 734 | Patient103C  | Patient235A |
| 734 | Patient120B  | Patient217B |
| 734 | Patient120B  | Patient217F |
| 734 | Patient120C  | Patient217D |
| 734 | Patient123A  | Patient220B |
| 734 | Patient145C  | Patient192C |
| 734 | Patient210   | Patient236A |
| 734 | Patient210   | Patient252A |
| 734 | Patient217I  | Patient235A |
| 735 | Patient021A2 | Patient210  |
| 735 | Patient086C  | Patient183D |
| 735 | Patient097A  | Patient210  |
| 735 | Patient120B  | Patient217A |
| 735 | Patient120B  | Patient217E |

|     |             |             |
|-----|-------------|-------------|
| 735 | Patient120B | Patient217H |
| 735 | Patient120C | Patient217B |
| 735 | Patient121B | Patient195  |
| 735 | Patient159  | Patient210  |
| 735 | Patient192A | Patient261B |
| 735 | Patient207  | Patient235E |
| 735 | Patient210  | Patient252D |
| 735 | Patient235F | Patient261B |
| 736 | Patient022B | Patient074E |
| 736 | Patient026F | Patient235A |
| 736 | Patient086A | Patient183D |
| 736 | Patient086C | Patient183A |
| 736 | Patient100A | Patient210  |
| 736 | Patient108F | Patient210  |
| 736 | Patient120C | Patient217E |
| 736 | Patient120C | Patient217H |
| 736 | Patient192C | Patient261B |
| 736 | Patient210  | Patient220A |
| 736 | Patient210  | Patient252B |
| 736 | Patient210  | Patient265  |
| 737 | Patient026A | Patient235B |
| 737 | Patient086A | Patient183A |
| 737 | Patient086B | Patient183D |
| 737 | Patient086E | Patient183D |
| 737 | Patient097D | Patient210  |
| 737 | Patient103E | Patient120A |
| 737 | Patient120A | Patient181B |
| 737 | Patient120C | Patient217A |
| 737 | Patient120C | Patient217F |
| 737 | Patient121A | Patient195  |
| 737 | Patient145C | Patient192B |
| 737 | Patient235A | Patient258E |
| 738 | Patient022B | Patient192A |
| 738 | Patient026A | Patient235C |
| 738 | Patient086B | Patient183A |
| 738 | Patient086C | Patient183E |
| 738 | Patient086E | Patient183A |
| 738 | Patient097E | Patient210  |
| 738 | Patient120A | Patient235F |
| 738 | Patient123B | Patient220B |
| 738 | Patient123C | Patient220B |
| 738 | Patient192A | Patient261A |
| 738 | Patient192C | Patient261A |
| 739 | Patient032D | Patient192A |
| 739 | Patient086A | Patient183E |
| 739 | Patient210  | Patient252F |
| 739 | Patient235E | Patient261B |
| 739 | Patient235F | Patient261A |
| 740 | Patient074D | Patient164  |
| 740 | Patient097C | Patient210  |

|     |              |             |
|-----|--------------|-------------|
| 740 | Patient120A  | Patient235E |
| 740 | Patient210   | Patient222B |
| 740 | Patient217J  | Patient235A |
| 741 | Patient022B  | Patient192C |
| 741 | Patient022B  | Patient195  |
| 741 | Patient032D  | Patient192C |
| 741 | Patient066D  | Patient192A |
| 741 | Patient086B  | Patient183E |
| 741 | Patient086E  | Patient183E |
| 741 | Patient092D  | Patient206  |
| 741 | Patient092D  | Patient207  |
| 741 | Patient103B  | Patient235A |
| 741 | Patient120D  | Patient217I |
| 741 | Patient123D  | Patient220B |
| 741 | Patient126E  | Patient210  |
| 741 | Patient183C  | Patient220B |
| 741 | Patient192B  | Patient261B |
| 741 | Patient207   | Patient241  |
| 741 | Patient210   | Patient222E |
| 742 | Patient022B  | Patient192B |
| 742 | Patient053A1 | Patient242  |
| 742 | Patient086C  | Patient161B |
| 742 | Patient097B  | Patient210  |
| 742 | Patient120D  | Patient224A |
| 742 | Patient183B  | Patient220B |
| 742 | Patient210   | Patient222F |
| 743 | Patient022B  | Patient092A |
| 743 | Patient022B  | Patient206  |
| 743 | Patient022B  | Patient220B |
| 743 | Patient032A  | Patient192A |
| 743 | Patient120B  | Patient217I |
| 743 | Patient120C  | Patient224A |
| 743 | Patient120D  | Patient217J |
| 743 | Patient187   | Patient210  |
| 743 | Patient192A  | Patient261D |
| 743 | Patient192B  | Patient261A |
| 743 | Patient210   | Patient222A |
| 743 | Patient235E  | Patient261A |
| 743 | Patient235F  | Patient261D |
| 744 | Patient022B  | Patient092B |
| 744 | Patient026D  | Patient086C |
| 744 | Patient066D  | Patient192C |
| 744 | Patient120B  | Patient224A |
| 744 | Patient120C  | Patient217I |
| 744 | Patient145A  | Patient192A |
| 744 | Patient192C  | Patient261D |
| 745 | Patient026D  | Patient086A |
| 745 | Patient081A2 | Patient192A |
| 745 | Patient081B  | Patient192A |
| 745 | Patient086A  | Patient161B |



|     |              |             |
|-----|--------------|-------------|
| 745 | Patient149B  | Patient210  |
| 746 | Patient026D  | Patient086B |
| 746 | Patient026D  | Patient086E |
| 746 | Patient032A  | Patient192C |
| 746 | Patient032D  | Patient192B |
| 746 | Patient066E  | Patient192A |
| 746 | Patient086B  | Patient161B |
| 746 | Patient086E  | Patient161B |
| 746 | Patient183A  | Patient220B |
| 746 | Patient183E  | Patient220B |
| 746 | Patient192A  | Patient224B |
| 746 | Patient210   | Patient263B |
| 747 | Patient022B  | Patient092E |
| 747 | Patient066D  | Patient192B |
| 747 | Patient074E  | Patient164  |
| 747 | Patient081A1 | Patient192A |
| 747 | Patient120A  | Patient217C |
| 747 | Patient120B  | Patient217J |
| 747 | Patient131   | Patient210  |
| 747 | Patient145A  | Patient192C |
| 747 | Patient196A  | Patient210  |
| 747 | Patient196B  | Patient210  |
| 747 | Patient210   | Patient246A |
| 747 | Patient210   | Patient246C |
| 747 | Patient235C  | Patient261B |
| 748 | Patient032B  | Patient192A |
| 748 | Patient066F  | Patient192A |
| 748 | Patient081B  | Patient192C |
| 748 | Patient120C  | Patient217J |
| 748 | Patient181A  | Patient235A |
| 748 | Patient192B  | Patient261D |
| 748 | Patient196C  | Patient210  |
| 748 | Patient235B  | Patient261B |
| 748 | Patient235E  | Patient261D |
| 749 | Patient022B  | Patient251  |
| 749 | Patient081A2 | Patient192C |
| 749 | Patient081E  | Patient192A |
| 749 | Patient081F  | Patient192A |
| 749 | Patient120A  | Patient217D |
| 749 | Patient120D  | Patient176  |
| 750 | Patient022B  | Patient092H |
| 750 | Patient034A  | Patient192A |
| 750 | Patient066E  | Patient192C |
| 750 | Patient081A1 | Patient192C |
| 750 | Patient104B  | Patient210  |
| 750 | Patient120A  | Patient217B |
| 750 | Patient120A  | Patient217E |
| 750 | Patient120A  | Patient217F |
| 750 | Patient120B  | Patient207  |
| 750 | Patient120D  | Patient207  |

|     |              |             |
|-----|--------------|-------------|
| 750 | Patient145A  | Patient192B |
| 750 | Patient183D  | Patient220B |
| 750 | Patient192C  | Patient224B |
| 750 | Patient241   | Patient251  |
| 751 | Patient022B  | Patient183C |
| 751 | Patient026E  | Patient086C |
| 751 | Patient032A  | Patient192B |
| 751 | Patient032B  | Patient192C |
| 751 | Patient066F  | Patient192C |
| 751 | Patient081A2 | Patient120A |
| 751 | Patient081B  | Patient120A |
| 751 | Patient099A  | Patient210  |
| 751 | Patient120A  | Patient217A |
| 751 | Patient120A  | Patient217H |
| 751 | Patient210   | Patient218A |
| 751 | Patient235C  | Patient261A |
| 752 | Patient026E  | Patient086A |
| 752 | Patient034A  | Patient192C |
| 752 | Patient034B  | Patient192A |
| 752 | Patient034D  | Patient192A |
| 752 | Patient034E  | Patient192A |
| 752 | Patient066E  | Patient192B |
| 752 | Patient081A1 | Patient120A |
| 752 | Patient081A2 | Patient192B |
| 752 | Patient081B  | Patient192B |
| 752 | Patient081E  | Patient192C |
| 752 | Patient081F  | Patient192C |
| 752 | Patient099B  | Patient210  |
| 752 | Patient099E  | Patient210  |
| 752 | Patient104A  | Patient210  |
| 752 | Patient120B  | Patient176  |
| 752 | Patient120C  | Patient207  |
| 752 | Patient120D  | Patient224B |
| 752 | Patient141D  | Patient192A |
| 752 | Patient145C  | Patient192E |
| 752 | Patient177   | Patient220B |
| 752 | Patient192B  | Patient224B |
| 752 | Patient195   | Patient206  |
| 752 | Patient196E  | Patient210  |
| 752 | Patient235B  | Patient261A |
| 753 | Patient022B  | Patient183B |
| 753 | Patient026E  | Patient086B |
| 753 | Patient026E  | Patient086E |
| 753 | Patient066F  | Patient192B |
| 753 | Patient081A1 | Patient192B |
| 753 | Patient092A  | Patient206  |
| 753 | Patient092A  | Patient207  |
| 753 | Patient201B  | Patient210  |
| 753 | Patient210   | Patient218B |
| 754 | Patient026B  | Patient235B |

|     |             |              |
|-----|-------------|--------------|
| 754 | Patient034B | Patient192C  |
| 754 | Patient034D | Patient192C  |
| 754 | Patient034E | Patient192C  |
| 754 | Patient092B | Patient207   |
| 754 | Patient092E | Patient207   |
| 754 | Patient120B | Patient206   |
| 754 | Patient120C | Patient206   |
| 754 | Patient120C | Patient224B  |
| 754 | Patient120D | Patient206   |
| 754 | Patient141D | Patient192C  |
| 754 | Patient164  | Patient258B  |
| 754 | Patient192E | Patient261B  |
| 755 | Patient026B | Patient235C  |
| 755 | Patient032D | Patient241   |
| 755 | Patient034C | Patient192A  |
| 755 | Patient081F | Patient120A  |
| 755 | Patient092B | Patient206   |
| 755 | Patient092E | Patient206   |
| 755 | Patient092H | Patient207   |
| 755 | Patient120B | Patient224B  |
| 755 | Patient157  | Patient210   |
| 755 | Patient164  | Patient195   |
| 755 | Patient164  | Patient258D  |
| 755 | Patient164  | Patient258G  |
| 755 | Patient210  | Patient246B  |
| 755 | Patient235C | Patient261D  |
| 756 | Patient026F | Patient235B  |
| 756 | Patient032B | Patient192B  |
| 756 | Patient034C | Patient192C  |
| 756 | Patient045A | Patient086C  |
| 756 | Patient081F | Patient192B  |
| 756 | Patient099C | Patient210   |
| 756 | Patient099D | Patient210   |
| 756 | Patient103C | Patient120A  |
| 756 | Patient120C | Patient176   |
| 756 | Patient145C | Patient192F  |
| 756 | Patient164  | Patient258A1 |
| 756 | Patient192E | Patient261A  |
| 756 | Patient201A | Patient210   |
| 756 | Patient201E | Patient210   |
| 756 | Patient210  | Patient222D  |
| 756 | Patient215  | Patient233   |
| 757 | Patient026F | Patient235C  |
| 757 | Patient034A | Patient192B  |
| 757 | Patient074B | Patient120C  |
| 757 | Patient081E | Patient120A  |
| 757 | Patient081E | Patient192B  |
| 757 | Patient164  | Patient258A2 |
| 757 | Patient164  | Patient258F  |
| 757 | Patient206  | Patient242   |

|     |             |             |
|-----|-------------|-------------|
| 757 | Patient210  | Patient246E |
| 757 | Patient235B | Patient261D |
| 758 | Patient022B | Patient183A |
| 758 | Patient034B | Patient192B |
| 758 | Patient034D | Patient192B |
| 758 | Patient045B | Patient086C |
| 758 | Patient045C | Patient086C |
| 758 | Patient074A | Patient120D |
| 758 | Patient074B | Patient120B |
| 758 | Patient074B | Patient120D |
| 758 | Patient092H | Patient206  |
| 758 | Patient120A | Patient126C |
| 758 | Patient126A | Patient192A |
| 758 | Patient126A | Patient235A |
| 758 | Patient141D | Patient192B |
| 758 | Patient181B | Patient235A |
| 758 | Patient192A | Patient206  |
| 758 | Patient192A | Patient207  |
| 759 | Patient022B | Patient192E |
| 759 | Patient034E | Patient192B |
| 759 | Patient045A | Patient086A |
| 759 | Patient074A | Patient120C |
| 759 | Patient120A | Patient217I |
| 759 | Patient126A | Patient192C |
| 759 | Patient126C | Patient192A |
| 760 | Patient022B | Patient183D |
| 760 | Patient022B | Patient192F |
| 760 | Patient032D | Patient192E |
| 760 | Patient045A | Patient086B |
| 760 | Patient045A | Patient086E |
| 760 | Patient074A | Patient120B |
| 760 | Patient126C | Patient192C |
| 760 | Patient161B | Patient164  |
| 760 | Patient167  | Patient241  |
| 760 | Patient181A | Patient192A |
| 760 | Patient192F | Patient261B |
| 760 | Patient210  | Patient246D |
| 761 | Patient022B | Patient173A |
| 761 | Patient022B | Patient183E |
| 761 | Patient045B | Patient086A |
| 761 | Patient045C | Patient086A |
| 761 | Patient066D | Patient192E |
| 761 | Patient074B | Patient192A |
| 761 | Patient103B | Patient120A |
| 761 | Patient120A | Patient217J |
| 761 | Patient192E | Patient261D |
| 761 | Patient192F | Patient261A |
| 761 | Patient210  | Patient232B |
| 761 | Patient210  | Patient247A |
| 762 | Patient034C | Patient192B |

|     |              |             |
|-----|--------------|-------------|
| 762 | Patient074C  | Patient120D |
| 762 | Patient103A  | Patient192A |
| 762 | Patient120A  | Patient126A |
| 762 | Patient210   | Patient247C |
| 763 | Patient045B  | Patient086B |
| 763 | Patient045B  | Patient086E |
| 763 | Patient066D  | Patient120D |
| 763 | Patient074C  | Patient120B |
| 763 | Patient074C  | Patient120C |
| 763 | Patient120D  | Patient141C |
| 763 | Patient181A  | Patient192C |
| 763 | Patient192C  | Patient206  |
| 763 | Patient192C  | Patient207  |
| 763 | Patient210   | Patient232D |
| 764 | Patient032A  | Patient192E |
| 764 | Patient032D  | Patient192F |
| 764 | Patient045C  | Patient086B |
| 764 | Patient045C  | Patient086E |
| 764 | Patient074A  | Patient192A |
| 764 | Patient074B  | Patient192C |
| 764 | Patient081A2 | Patient192E |
| 764 | Patient081B  | Patient192E |
| 764 | Patient126A  | Patient192B |
| 764 | Patient126C  | Patient192B |
| 764 | Patient145A  | Patient192E |
| 764 | Patient192A  | Patient224A |
| 764 | Patient207   | Patient235B |
| 764 | Patient210   | Patient232C |
| 764 | Patient210   | Patient232E |
| 765 | Patient081A1 | Patient192E |
| 765 | Patient086C  | Patient150A |
| 765 | Patient086C  | Patient150B |
| 765 | Patient192B  | Patient206  |
| 765 | Patient192B  | Patient207  |
| 765 | Patient210   | Patient232A |
| 765 | Patient210   | Patient247B |
| 765 | Patient210   | Patient247D |
| 766 | Patient066D  | Patient120B |
| 766 | Patient066D  | Patient192F |
| 766 | Patient066E  | Patient192E |
| 766 | Patient103A  | Patient192C |
| 766 | Patient120B  | Patient141C |
| 766 | Patient120D  | Patient141B |
| 766 | Patient181A  | Patient192B |
| 766 | Patient196D  | Patient210  |
| 766 | Patient207   | Patient235C |
| 767 | Patient066D  | Patient120C |
| 767 | Patient066F  | Patient192E |
| 767 | Patient074A  | Patient192C |
| 767 | Patient074B  | Patient192B |

|     |              |             |
|-----|--------------|-------------|
| 767 | Patient074C  | Patient192A |
| 767 | Patient086C  | Patient150C |
| 767 | Patient103A  | Patient192B |
| 767 | Patient120C  | Patient141C |
| 767 | Patient120D  | Patient230A |
| 767 | Patient141C  | Patient192A |
| 767 | Patient164   | Patient258E |
| 767 | Patient192E  | Patient224B |
| 767 | Patient192F  | Patient261D |
| 767 | Patient210   | Patient247E |
| 768 | Patient032A  | Patient192F |
| 768 | Patient081F  | Patient192E |
| 768 | Patient086A  | Patient150A |
| 768 | Patient086A  | Patient150B |
| 768 | Patient086A  | Patient150C |
| 768 | Patient086C  | Patient177  |
| 768 | Patient120B  | Patient141B |
| 768 | Patient141B  | Patient192A |
| 768 | Patient192C  | Patient224A |
| 769 | Patient066E  | Patient120D |
| 769 | Patient074A  | Patient192B |
| 769 | Patient074D  | Patient120C |
| 769 | Patient081E  | Patient192E |
| 769 | Patient120B  | Patient230F |
| 769 | Patient120C  | Patient141B |
| 769 | Patient120D  | Patient230F |
| 769 | Patient121A  | Patient220B |
| 769 | Patient141C  | Patient192C |
| 769 | Patient181B  | Patient192A |
| 769 | Patient192A  | Patient230A |
| 770 | Patient026C  | Patient164  |
| 770 | Patient032B  | Patient192E |
| 770 | Patient074D  | Patient120B |
| 770 | Patient074D  | Patient120D |
| 770 | Patient081A2 | Patient192F |
| 770 | Patient086B  | Patient150A |
| 770 | Patient086E  | Patient150A |
| 770 | Patient120B  | Patient230A |
| 770 | Patient120C  | Patient230F |
| 770 | Patient120D  | Patient141A |
| 770 | Patient141B  | Patient192C |
| 770 | Patient145A  | Patient192F |
| 770 | Patient192A  | Patient230F |
| 771 | Patient034A  | Patient192E |
| 771 | Patient053A1 | Patient241  |
| 771 | Patient066E  | Patient192F |
| 771 | Patient066F  | Patient120D |
| 771 | Patient074C  | Patient192C |
| 771 | Patient081B  | Patient192F |
| 771 | Patient086A  | Patient177  |

|     |              |             |
|-----|--------------|-------------|
| 771 | Patient086B  | Patient150B |
| 771 | Patient086B  | Patient150C |
| 771 | Patient086E  | Patient150B |
| 771 | Patient086E  | Patient150C |
| 771 | Patient103C  | Patient164  |
| 771 | Patient120D  | Patient230E |
| 771 | Patient181B  | Patient192C |
| 771 | Patient192A  | Patient230E |
| 771 | Patient192B  | Patient224A |
| 771 | Patient192C  | Patient230A |
| 772 | Patient034B  | Patient192E |
| 772 | Patient034D  | Patient192E |
| 772 | Patient066E  | Patient120B |
| 772 | Patient066F  | Patient192F |
| 772 | Patient086B  | Patient177  |
| 772 | Patient086E  | Patient177  |
| 772 | Patient120B  | Patient141A |
| 772 | Patient120C  | Patient230A |
| 772 | Patient120D  | Patient230B |
| 772 | Patient121B  | Patient220B |
| 772 | Patient141D  | Patient192E |
| 772 | Patient192A  | Patient230B |
| 772 | Patient192C  | Patient230E |
| 772 | Patient192C  | Patient230F |
| 772 | Patient192F  | Patient224B |
| 773 | Patient034E  | Patient192E |
| 773 | Patient066E  | Patient120C |
| 773 | Patient066F  | Patient120B |
| 773 | Patient074C  | Patient192B |
| 773 | Patient081A1 | Patient192F |
| 773 | Patient081F  | Patient192F |
| 773 | Patient103C  | Patient192A |
| 773 | Patient120C  | Patient141A |
| 773 | Patient141A  | Patient192A |
| 773 | Patient164   | Patient217C |
| 774 | Patient032B  | Patient192F |
| 774 | Patient066F  | Patient120C |
| 774 | Patient074D  | Patient192A |
| 774 | Patient074E  | Patient120C |
| 774 | Patient141A  | Patient192C |
| 774 | Patient141C  | Patient192B |
| 774 | Patient164   | Patient217D |
| 774 | Patient192C  | Patient230B |
| 775 | Patient034B  | Patient192F |
| 775 | Patient034D  | Patient192F |
| 775 | Patient074E  | Patient120B |
| 775 | Patient074E  | Patient120D |
| 775 | Patient081E  | Patient192F |
| 775 | Patient120B  | Patient230B |
| 775 | Patient141B  | Patient192B |

|     |              |             |
|-----|--------------|-------------|
| 775 | Patient164   | Patient217B |
| 775 | Patient181B  | Patient192B |
| 775 | Patient192B  | Patient230A |
| 776 | Patient026C  | Patient235B |
| 776 | Patient034A  | Patient192F |
| 776 | Patient089A1 | Patient179  |
| 776 | Patient103B  | Patient164  |
| 776 | Patient120C  | Patient230B |
| 776 | Patient164   | Patient217A |
| 776 | Patient164   | Patient217E |
| 776 | Patient164   | Patient217H |
| 776 | Patient235C  | Patient258E |
| 777 | Patient026C  | Patient235C |
| 777 | Patient034C  | Patient192E |
| 777 | Patient034E  | Patient192F |
| 777 | Patient074D  | Patient192C |
| 777 | Patient089A2 | Patient179  |
| 777 | Patient103B  | Patient192A |
| 777 | Patient103C  | Patient192C |
| 777 | Patient126C  | Patient235B |
| 777 | Patient158   | Patient210  |
| 777 | Patient164   | Patient217F |
| 777 | Patient235B  | Patient258E |
| 778 | Patient022B  | Patient126A |
| 778 | Patient022B  | Patient213A |
| 778 | Patient086C  | Patient213A |
| 778 | Patient103C  | Patient192B |
| 778 | Patient103D  | Patient235A |
| 778 | Patient126A  | Patient192E |
| 778 | Patient126C  | Patient192E |
| 778 | Patient126C  | Patient235C |
| 778 | Patient141D  | Patient192F |
| 778 | Patient192B  | Patient230B |
| 778 | Patient192B  | Patient230F |
| 779 | Patient120B  | Patient192D |
| 779 | Patient192B  | Patient230E |
| 780 | Patient034C  | Patient192F |
| 780 | Patient074D  | Patient192B |
| 780 | Patient074E  | Patient192A |
| 780 | Patient120B  | Patient230E |
| 780 | Patient120D  | Patient192D |
| 780 | Patient141A  | Patient192B |
| 780 | Patient181A  | Patient192E |
| 781 | Patient074B  | Patient192E |
| 781 | Patient086A  | Patient213A |
| 781 | Patient103A  | Patient192E |
| 781 | Patient103B  | Patient192C |
| 781 | Patient120C  | Patient230E |
| 781 | Patient164   | Patient217I |
| 781 | Patient164   | Patient224A |



|     |              |             |
|-----|--------------|-------------|
| 782 | Patient103D  | Patient220B |
| 782 | Patient120C  | Patient192D |
| 782 | Patient126C  | Patient192F |
| 782 | Patient173A  | Patient192A |
| 782 | Patient192E  | Patient206  |
| 782 | Patient192E  | Patient207  |
| 782 | Patient224A  | Patient235F |
| 783 | Patient053C  | Patient220B |
| 783 | Patient074A  | Patient192E |
| 783 | Patient074E  | Patient192C |
| 783 | Patient086B  | Patient213A |
| 783 | Patient086E  | Patient213A |
| 783 | Patient103B  | Patient192B |
| 783 | Patient103E  | Patient235A |
| 783 | Patient126A  | Patient192F |
| 783 | Patient126A  | Patient235F |
| 783 | Patient224B  | Patient235F |
| 784 | Patient088   | Patient179  |
| 784 | Patient120A  | Patient192D |
| 784 | Patient173B  | Patient235B |
| 784 | Patient173B  | Patient235C |
| 784 | Patient192F  | Patient206  |
| 784 | Patient192F  | Patient207  |
| 784 | Patient224B  | Patient235A |
| 785 | Patient053A2 | Patient220B |
| 785 | Patient103A  | Patient192F |
| 785 | Patient173A  | Patient192C |
| 785 | Patient192E  | Patient224A |
| 786 | Patient074E  | Patient192B |
| 786 | Patient181A  | Patient192F |
| 786 | Patient224A  | Patient235E |
| 787 | Patient029   | Patient171  |
| 787 | Patient053B  | Patient220B |
| 787 | Patient074C  | Patient192E |
| 787 | Patient103E  | Patient220B |
| 787 | Patient126A  | Patient235E |
| 787 | Patient173B  | Patient192A |
| 787 | Patient224B  | Patient235E |
| 788 | Patient074A  | Patient192F |
| 788 | Patient074B  | Patient192F |
| 788 | Patient103C  | Patient235F |
| 788 | Patient141C  | Patient192E |
| 788 | Patient164   | Patient217J |
| 788 | Patient173A  | Patient192B |
| 789 | Patient089A1 | Patient180  |
| 789 | Patient141B  | Patient192E |
| 789 | Patient173B  | Patient192C |
| 789 | Patient181B  | Patient192E |
| 789 | Patient192E  | Patient230A |
| 789 | Patient206   | Patient241  |

|     |              |              |
|-----|--------------|--------------|
| 790 | Patient192F  | Patient224A  |
| 790 | Patient195   | Patient235F  |
| 791 | Patient192A  | Patient195   |
| 792 | Patient022B  | Patient235F  |
| 792 | Patient074C  | Patient192F  |
| 792 | Patient089A2 | Patient180   |
| 792 | Patient103C  | Patient192E  |
| 792 | Patient103C  | Patient235E  |
| 792 | Patient141C  | Patient192F  |
| 792 | Patient173B  | Patient192B  |
| 792 | Patient192E  | Patient230B  |
| 792 | Patient192E  | Patient230F  |
| 792 | Patient220B  | Patient235F  |
| 793 | Patient181A  | Patient235F  |
| 793 | Patient192C  | Patient195   |
| 793 | Patient192E  | Patient230E  |
| 793 | Patient192F  | Patient230A  |
| 793 | Patient195   | Patient235E  |
| 794 | Patient022B  | Patient177   |
| 794 | Patient045A  | Patient164   |
| 794 | Patient074D  | Patient192E  |
| 794 | Patient092C  | Patient220B  |
| 794 | Patient103B  | Patient235F  |
| 794 | Patient141A  | Patient192E  |
| 794 | Patient141B  | Patient192F  |
| 794 | Patient145B  | Patient242   |
| 795 | Patient164   | Patient192D  |
| 795 | Patient181B  | Patient192F  |
| 795 | Patient220B  | Patient235E  |
| 796 | Patient022B  | Patient235E  |
| 796 | Patient192B  | Patient195   |
| 796 | Patient192F  | Patient230E  |
| 796 | Patient192F  | Patient230F  |
| 797 | Patient045B  | Patient164   |
| 797 | Patient103B  | Patient192E  |
| 797 | Patient120D  | Patient235A  |
| 797 | Patient181A  | Patient235E  |
| 798 | Patient022B  | Patient235C  |
| 798 | Patient088   | Patient180   |
| 798 | Patient103B  | Patient235E  |
| 798 | Patient103C  | Patient192F  |
| 798 | Patient192F  | Patient230B  |
| 798 | Patient217C  | Patient235B  |
| 799 | Patient022B  | Patient235B  |
| 799 | Patient045C  | Patient164   |
| 799 | Patient074B  | Patient235F  |
| 799 | Patient074E  | Patient192E  |
| 799 | Patient120B  | Patient235A  |
| 799 | Patient141A  | Patient192F  |
| 799 | Patient152A  | Patient258C1 |

|     |             |              |
|-----|-------------|--------------|
| 799 | Patient152A | Patient258C2 |
| 799 | Patient152B | Patient258C1 |
| 799 | Patient152B | Patient258C2 |
| 799 | Patient217C | Patient235C  |
| 799 | Patient217D | Patient235B  |
| 800 | Patient074D | Patient192F  |
| 800 | Patient092D | Patient220B  |
| 800 | Patient103A | Patient235F  |
| 800 | Patient103D | Patient120D  |
| 800 | Patient158  | Patient189B  |
| 800 | Patient217B | Patient235B  |
| 800 | Patient217D | Patient235C  |
| 801 | Patient022B | Patient120A  |
| 801 | Patient069  | Patient193   |
| 801 | Patient120C | Patient235A  |
| 801 | Patient217B | Patient235C  |
| 801 | Patient217E | Patient235B  |
| 801 | Patient217H | Patient235B  |
| 802 | Patient074A | Patient235F  |
| 802 | Patient103D | Patient120C  |
| 802 | Patient173A | Patient192E  |
| 802 | Patient217A | Patient235B  |
| 802 | Patient217E | Patient235C  |
| 802 | Patient217F | Patient235B  |
| 802 | Patient217H | Patient235C  |
| 803 | Patient032E | Patient242   |
| 803 | Patient074B | Patient235E  |
| 803 | Patient181B | Patient235F  |
| 803 | Patient217A | Patient235C  |
| 803 | Patient217F | Patient235C  |
| 804 | Patient103A | Patient235E  |
| 804 | Patient103B | Patient192F  |
| 804 | Patient103D | Patient120B  |
| 804 | Patient120D | Patient181A  |
| 804 | Patient158  | Patient189A  |
| 804 | Patient173A | Patient235F  |
| 805 | Patient103E | Patient120C  |
| 805 | Patient103E | Patient120D  |
| 806 | Patient074A | Patient235E  |
| 806 | Patient074C | Patient235F  |
| 806 | Patient120B | Patient181A  |
| 806 | Patient120C | Patient181A  |
| 806 | Patient158  | Patient189E  |
| 806 | Patient173B | Patient192E  |
| 807 | Patient032C | Patient242   |
| 807 | Patient074E | Patient192F  |
| 807 | Patient092A | Patient220B  |
| 807 | Patient103E | Patient120B  |
| 807 | Patient173A | Patient192F  |
| 807 | Patient181B | Patient235E  |

|     |              |              |
|-----|--------------|--------------|
| 808 | Patient069   | Patient189C1 |
| 808 | Patient069   | Patient189C2 |
| 808 | Patient092E  | Patient220B  |
| 808 | Patient173A  | Patient235E  |
| 809 | Patient103A  | Patient235B  |
| 809 | Patient192A  | Patient220B  |
| 809 | Patient217I  | Patient235B  |
| 810 | Patient074C  | Patient235E  |
| 810 | Patient092B  | Patient220B  |
| 810 | Patient192C  | Patient220B  |
| 810 | Patient192E  | Patient195   |
| 810 | Patient217I  | Patient235C  |
| 811 | Patient069   | Patient114   |
| 811 | Patient103A  | Patient235C  |
| 811 | Patient173B  | Patient192F  |
| 812 | Patient206   | Patient235F  |
| 813 | Patient074D  | Patient235F  |
| 813 | Patient120B  | Patient181B  |
| 813 | Patient120D  | Patient181B  |
| 814 | Patient092H  | Patient220B  |
| 814 | Patient192B  | Patient220B  |
| 814 | Patient217J  | Patient235B  |
| 814 | Patient230G  | Patient242   |
| 815 | Patient023   | Patient210   |
| 815 | Patient092G  | Patient220B  |
| 815 | Patient120C  | Patient181B  |
| 815 | Patient217J  | Patient235C  |
| 816 | Patient242   | Patient261E  |
| 817 | Patient074D  | Patient235E  |
| 817 | Patient141G  | Patient242   |
| 817 | Patient192F  | Patient195   |
| 817 | Patient206   | Patient235E  |
| 817 | Patient230C  | Patient242   |
| 818 | Patient074E  | Patient235F  |
| 818 | Patient081B  | Patient235B  |
| 818 | Patient145C  | Patient242   |
| 819 | Patient081B  | Patient235C  |
| 819 | Patient176   | Patient242   |
| 819 | Patient242   | Patient261C  |
| 820 | Patient120D  | Patient126C  |
| 821 | Patient120A  | Patient235A  |
| 821 | Patient152A  | Patient233   |
| 821 | Patient195   | Patient235A  |
| 822 | Patient074E  | Patient235E  |
| 822 | Patient120B  | Patient126C  |
| 822 | Patient141F  | Patient242   |
| 822 | Patient145B  | Patient241   |
| 823 | Patient032A  | Patient242   |
| 823 | Patient081A1 | Patient235C  |
| 823 | Patient081A2 | Patient235B  |

|     |              |             |
|-----|--------------|-------------|
| 823 | Patient120D  | Patient126A |
| 823 | Patient152B  | Patient233  |
| 824 | Patient034A  | Patient242  |
| 824 | Patient081A1 | Patient235B |
| 824 | Patient081A2 | Patient235C |
| 824 | Patient081F  | Patient235B |
| 824 | Patient103C  | Patient120D |
| 824 | Patient120C  | Patient126C |
| 825 | Patient081E  | Patient235C |
| 825 | Patient081F  | Patient235C |
| 825 | Patient120A  | Patient164  |
| 825 | Patient120B  | Patient126A |
| 825 | Patient120C  | Patient126A |
| 826 | Patient032B  | Patient242  |
| 826 | Patient081E  | Patient235B |
| 826 | Patient103C  | Patient120B |
| 826 | Patient213A  | Patient220B |
| 826 | Patient242   | Patient261G |
| 827 | Patient034E  | Patient242  |
| 827 | Patient103C  | Patient120C |
| 827 | Patient198   | Patient233  |
| 828 | Patient192E  | Patient220B |
| 829 | Patient034D  | Patient242  |
| 829 | Patient081A1 | Patient120D |
| 829 | Patient120D  | Patient235C |
| 830 | Patient032E  | Patient241  |
| 830 | Patient034B  | Patient242  |
| 830 | Patient081A2 | Patient120B |
| 830 | Patient081A2 | Patient120D |
| 830 | Patient081B  | Patient120B |
| 830 | Patient081B  | Patient120D |
| 830 | Patient103B  | Patient120C |
| 830 | Patient120D  | Patient235B |
| 830 | Patient164   | Patient235A |
| 831 | Patient081A1 | Patient120B |
| 831 | Patient081A2 | Patient120C |
| 831 | Patient081B  | Patient120C |
| 831 | Patient103B  | Patient120B |
| 831 | Patient103B  | Patient120D |
| 831 | Patient103D  | Patient192A |
| 831 | Patient141D  | Patient242  |
| 831 | Patient145A  | Patient242  |
| 831 | Patient192F  | Patient220B |
| 832 | Patient034C  | Patient242  |
| 832 | Patient081A1 | Patient120C |
| 832 | Patient120B  | Patient235B |
| 832 | Patient120D  | Patient173A |
| 832 | Patient120D  | Patient173B |
| 833 | Patient120B  | Patient235C |
| 834 | Patient081E  | Patient120D |

|     |             |             |
|-----|-------------|-------------|
| 834 | Patient081F | Patient120D |
| 834 | Patient103E | Patient192A |
| 834 | Patient120C | Patient235B |
| 834 | Patient242  | Patient261A |
| 834 | Patient242  | Patient261B |
| 835 | Patient103D | Patient192C |
| 835 | Patient120A | Patient195  |
| 835 | Patient120C | Patient235C |
| 836 | Patient081E | Patient120B |
| 836 | Patient081F | Patient120B |
| 836 | Patient103D | Patient192B |
| 836 | Patient120B | Patient173A |
| 836 | Patient120B | Patient173B |
| 837 | Patient032C | Patient241  |
| 837 | Patient081E | Patient120C |
| 837 | Patient081F | Patient120C |
| 837 | Patient120C | Patient173A |
| 838 | Patient066D | Patient235C |
| 838 | Patient103E | Patient192C |
| 838 | Patient120C | Patient173B |
| 839 | Patient066D | Patient235B |
| 840 | Patient026D | Patient164  |
| 840 | Patient103E | Patient192B |
| 840 | Patient242  | Patient261D |
| 842 | Patient208  | Patient233  |
| 843 | Patient066E | Patient235C |
| 843 | Patient230G | Patient241  |
| 845 | Patient145C | Patient241  |
| 845 | Patient176  | Patient241  |
| 846 | Patient066E | Patient235B |
| 846 | Patient066F | Patient235B |
| 846 | Patient206  | Patient235B |
| 847 | Patient066F | Patient235C |
| 847 | Patient241  | Patient261E |
| 848 | Patient074B | Patient235A |
| 848 | Patient141G | Patient241  |
| 848 | Patient206  | Patient235C |
| 848 | Patient230C | Patient241  |
| 848 | Patient241  | Patient261C |
| 849 | Patient026E | Patient164  |
| 849 | Patient032A | Patient241  |
| 850 | Patient034A | Patient241  |
| 850 | Patient103D | Patient192E |
| 851 | Patient074A | Patient235A |
| 852 | Patient103C | Patient235B |
| 852 | Patient103C | Patient235C |
| 853 | Patient141F | Patient241  |
| 854 | Patient032B | Patient241  |
| 854 | Patient074C | Patient235A |
| 854 | Patient092G | Patient242  |

|     |             |              |
|-----|-------------|--------------|
| 854 | Patient103E | Patient192E  |
| 854 | Patient141B | Patient235C  |
| 854 | Patient141C | Patient235C  |
| 855 | Patient034E | Patient241   |
| 855 | Patient126A | Patient164   |
| 855 | Patient141B | Patient235B  |
| 855 | Patient141C | Patient235B  |
| 855 | Patient241  | Patient261G  |
| 856 | Patient034B | Patient241   |
| 856 | Patient034D | Patient241   |
| 856 | Patient103D | Patient192F  |
| 856 | Patient126A | Patient235C  |
| 857 | Patient103B | Patient235B  |
| 857 | Patient126A | Patient235B  |
| 858 | Patient126C | Patient164   |
| 858 | Patient145A | Patient241   |
| 858 | Patient217C | Patient220B  |
| 858 | Patient220B | Patient258B  |
| 858 | Patient220B | Patient258G  |
| 859 | Patient034C | Patient241   |
| 859 | Patient103B | Patient235C  |
| 859 | Patient123A | Patient242   |
| 859 | Patient217D | Patient220B  |
| 859 | Patient220B | Patient258D  |
| 860 | Patient045D | Patient054   |
| 860 | Patient141A | Patient235C  |
| 860 | Patient150A | Patient164   |
| 860 | Patient173A | Patient235B  |
| 860 | Patient173A | Patient235C  |
| 860 | Patient217A | Patient220B  |
| 860 | Patient217B | Patient220B  |
| 860 | Patient220B | Patient258A1 |
| 860 | Patient224A | Patient235B  |
| 860 | Patient241  | Patient261B  |
| 861 | Patient103E | Patient192F  |
| 861 | Patient141A | Patient235B  |
| 861 | Patient150B | Patient164   |
| 861 | Patient217E | Patient220B  |
| 861 | Patient217F | Patient220B  |
| 861 | Patient217H | Patient220B  |
| 861 | Patient220B | Patient258A2 |
| 861 | Patient220B | Patient258F  |
| 861 | Patient224A | Patient235C  |
| 862 | Patient074D | Patient235A  |
| 862 | Patient141D | Patient241   |
| 862 | Patient150C | Patient164   |
| 862 | Patient230A | Patient235C  |
| 862 | Patient241  | Patient261A  |
| 863 | Patient123C | Patient242   |
| 863 | Patient230A | Patient235B  |

|     |             |              |
|-----|-------------|--------------|
| 864 | Patient026B | Patient164   |
| 864 | Patient183C | Patient242   |
| 865 | Patient022B | Patient120D  |
| 865 | Patient026F | Patient164   |
| 865 | Patient123B | Patient242   |
| 865 | Patient183B | Patient242   |
| 866 | Patient026A | Patient164   |
| 866 | Patient241  | Patient261D  |
| 867 | Patient074E | Patient235A  |
| 867 | Patient103D | Patient235F  |
| 867 | Patient183D | Patient242   |
| 867 | Patient230B | Patient235C  |
| 867 | Patient230E | Patient235C  |
| 867 | Patient230F | Patient235B  |
| 867 | Patient230F | Patient235C  |
| 868 | Patient123D | Patient242   |
| 868 | Patient217I | Patient220B  |
| 868 | Patient230B | Patient235B  |
| 869 | Patient183A | Patient242   |
| 869 | Patient183E | Patient242   |
| 869 | Patient230E | Patient235B  |
| 870 | Patient028  | Patient038   |
| 870 | Patient086C | Patient120A  |
| 871 | Patient022B | Patient120B  |
| 871 | Patient103D | Patient235E  |
| 872 | Patient038  | Patient222C  |
| 872 | Patient103E | Patient235F  |
| 872 | Patient120A | Patient235B  |
| 872 | Patient217J | Patient220B  |
| 873 | Patient038  | Patient263A  |
| 873 | Patient086A | Patient120A  |
| 873 | Patient120A | Patient235C  |
| 873 | Patient215  | Patient258C1 |
| 873 | Patient215  | Patient258C2 |
| 875 | Patient022B | Patient120C  |
| 876 | Patient086E | Patient120A  |
| 876 | Patient103E | Patient235E  |
| 877 | Patient086B | Patient120A  |
| 877 | Patient164  | Patient173A  |
| 878 | Patient103D | Patient235B  |
| 878 | Patient103D | Patient235C  |
| 879 | Patient181A | Patient235B  |
| 879 | Patient181A | Patient235C  |
| 879 | Patient220B | Patient258E  |
| 881 | Patient092G | Patient241   |
| 883 | Patient103E | Patient235B  |
| 883 | Patient103E | Patient235C  |
| 884 | Patient054  | Patient222C  |
| 885 | Patient028  | Patient054   |
| 886 | Patient038  | Patient045D  |



|     |              |              |
|-----|--------------|--------------|
| 886 | Patient123A  | Patient241   |
| 887 | Patient032D  | Patient086C  |
| 888 | Patient026C  | Patient220B  |
| 889 | Patient032D  | Patient086A  |
| 889 | Patient181B  | Patient235B  |
| 889 | Patient181B  | Patient235C  |
| 890 | Patient032D  | Patient086E  |
| 890 | Patient038   | Patient196F  |
| 890 | Patient123C  | Patient241   |
| 891 | Patient032D  | Patient086B  |
| 891 | Patient054   | Patient263A  |
| 891 | Patient081C  | Patient220B  |
| 891 | Patient208   | Patient258C1 |
| 891 | Patient208   | Patient258C2 |
| 892 | Patient103A  | Patient242   |
| 892 | Patient183C  | Patient241   |
| 893 | Patient022B  | Patient241   |
| 893 | Patient054   | Patient196F  |
| 893 | Patient081D  | Patient220B  |
| 894 | Patient123B  | Patient241   |
| 894 | Patient183B  | Patient241   |
| 896 | Patient123D  | Patient241   |
| 896 | Patient183D  | Patient241   |
| 896 | Patient183E  | Patient241   |
| 897 | Patient081B  | Patient220B  |
| 898 | Patient022B  | Patient242   |
| 898 | Patient183A  | Patient241   |
| 899 | Patient081A1 | Patient220B  |
| 899 | Patient120D  | Patient164   |
| 900 | Patient081A2 | Patient220B  |
| 901 | Patient026C  | Patient086C  |
| 902 | Patient081E  | Patient220B  |
| 902 | Patient120B  | Patient164   |
| 903 | Patient086C  | Patient217C  |
| 903 | Patient120C  | Patient164   |
| 904 | Patient086C  | Patient217F  |
| 904 | Patient152A  | Patient215   |
| 905 | Patient026C  | Patient086A  |
| 905 | Patient081F  | Patient220B  |
| 905 | Patient086C  | Patient217D  |
| 905 | Patient152B  | Patient215   |
| 906 | Patient086A  | Patient217C  |
| 906 | Patient086C  | Patient217A  |
| 906 | Patient086C  | Patient217B  |
| 907 | Patient026C  | Patient086E  |
| 907 | Patient086C  | Patient217E  |
| 907 | Patient086C  | Patient217H  |
| 908 | Patient026C  | Patient086B  |
| 908 | Patient086A  | Patient217D  |
| 908 | Patient086E  | Patient217C  |

|     |              |             |
|-----|--------------|-------------|
| 909 | Patient086A  | Patient217A |
| 909 | Patient086A  | Patient217B |
| 909 | Patient086A  | Patient217F |
| 909 | Patient086B  | Patient217C |
| 909 | Patient086E  | Patient217D |
| 909 | Patient121A  | Patient242  |
| 910 | Patient086A  | Patient217E |
| 910 | Patient086A  | Patient217H |
| 910 | Patient086B  | Patient217D |
| 910 | Patient086E  | Patient217A |
| 910 | Patient086E  | Patient217B |
| 910 | Patient092C  | Patient242  |
| 911 | Patient053A2 | Patient242  |
| 911 | Patient053C  | Patient242  |
| 911 | Patient086A  | Patient258E |
| 911 | Patient086B  | Patient217A |
| 911 | Patient086B  | Patient217B |
| 911 | Patient086C  | Patient258E |
| 911 | Patient086E  | Patient217H |
| 912 | Patient086B  | Patient217H |
| 912 | Patient086E  | Patient217E |
| 912 | Patient086E  | Patient217F |
| 912 | Patient086E  | Patient258E |
| 913 | Patient053B  | Patient242  |
| 913 | Patient086B  | Patient217E |
| 913 | Patient086B  | Patient217F |
| 913 | Patient086B  | Patient258E |
| 913 | Patient086C  | Patient217I |
| 913 | Patient120D  | Patient195  |
| 914 | Patient164   | Patient173B |
| 914 | Patient164   | Patient235B |
| 914 | Patient164   | Patient235C |
| 915 | Patient120B  | Patient195  |
| 916 | Patient086A  | Patient217I |
| 916 | Patient192D  | Patient220B |
| 917 | Patient086C  | Patient217J |
| 917 | Patient086E  | Patient217I |
| 917 | Patient120C  | Patient195  |
| 918 | Patient086B  | Patient217I |
| 918 | Patient121B  | Patient242  |
| 919 | Patient177   | Patient242  |
| 920 | Patient086A  | Patient217J |
| 920 | Patient103A  | Patient241  |
| 923 | Patient053A1 | Patient086C |
| 923 | Patient066D  | Patient220B |
| 923 | Patient086E  | Patient217J |
| 924 | Patient086B  | Patient217J |
| 925 | Patient092D  | Patient242  |
| 926 | Patient053A1 | Patient086A |
| 927 | Patient066E  | Patient220B |

|     |              |             |
|-----|--------------|-------------|
| 928 | Patient053A1 | Patient086E |
| 929 | Patient053A1 | Patient086B |
| 931 | Patient066F  | Patient220B |
| 932 | Patient192A  | Patient242  |
| 934 | Patient092A  | Patient242  |
| 936 | Patient092B  | Patient242  |
| 936 | Patient092C  | Patient241  |
| 937 | Patient192B  | Patient242  |
| 937 | Patient192C  | Patient242  |
| 938 | Patient092E  | Patient242  |
| 938 | Patient121A  | Patient241  |
| 939 | Patient092H  | Patient242  |
| 940 | Patient053C  | Patient241  |
| 940 | Patient164   | Patient220B |
| 940 | Patient220B  | Patient235A |
| 941 | Patient053A2 | Patient241  |
| 941 | Patient053B  | Patient241  |
| 941 | Patient086C  | Patient192D |
| 942 | Patient086E  | Patient192D |
| 942 | Patient141C  | Patient220B |
| 943 | Patient086A  | Patient192D |
| 943 | Patient086C  | Patient121B |
| 943 | Patient224B  | Patient235B |
| 944 | Patient038   | Patient149A |
| 944 | Patient086A  | Patient121B |
| 944 | Patient224B  | Patient235C |
| 945 | Patient086E  | Patient121B |
| 945 | Patient141A  | Patient220B |
| 945 | Patient141B  | Patient220B |
| 946 | Patient086B  | Patient121B |
| 946 | Patient086B  | Patient192D |
| 947 | Patient121B  | Patient241  |
| 947 | Patient164   | Patient242  |
| 948 | Patient092D  | Patient241  |
| 948 | Patient195   | Patient235B |
| 951 | Patient086C  | Patient121A |
| 951 | Patient158   | Patient204  |
| 951 | Patient177   | Patient241  |
| 951 | Patient195   | Patient235C |
| 952 | Patient086A  | Patient121A |
| 952 | Patient242   | Patient258B |
| 952 | Patient242   | Patient258D |
| 953 | Patient028   | Patient066A |
| 953 | Patient086E  | Patient121A |
| 953 | Patient181A  | Patient220B |
| 953 | Patient192E  | Patient242  |
| 953 | Patient242   | Patient258G |
| 954 | Patient066A  | Patient222C |
| 954 | Patient086B  | Patient121A |
| 954 | Patient103D  | Patient242  |

|     |             |              |
|-----|-------------|--------------|
| 954 | Patient242  | Patient258A1 |
| 955 | Patient192F | Patient242   |
| 955 | Patient242  | Patient258A2 |
| 955 | Patient242  | Patient258F  |
| 957 | Patient103E | Patient242   |
| 957 | Patient120A | Patient220B  |
| 957 | Patient181B | Patient220B  |
| 958 | Patient173A | Patient220B  |
| 960 | Patient192A | Patient241   |
| 961 | Patient173B | Patient220B  |
| 963 | Patient086A | Patient261A  |
| 963 | Patient086C | Patient261A  |
| 963 | Patient092A | Patient241   |
| 964 | Patient066A | Patient263A  |
| 964 | Patient092B | Patient241   |
| 964 | Patient192B | Patient241   |
| 965 | Patient066A | Patient158   |
| 965 | Patient086B | Patient261A  |
| 965 | Patient092E | Patient241   |
| 965 | Patient092H | Patient241   |
| 965 | Patient192C | Patient241   |
| 966 | Patient086E | Patient261A  |
| 967 | Patient086C | Patient235A  |
| 967 | Patient086C | Patient261B  |
| 968 | Patient086A | Patient235A  |
| 968 | Patient086A | Patient261B  |
| 968 | Patient086B | Patient261B  |
| 968 | Patient192D | Patient241   |
| 969 | Patient086E | Patient235A  |
| 969 | Patient086E | Patient261B  |
| 970 | Patient045D | Patient066A  |
| 970 | Patient086B | Patient235A  |
| 970 | Patient126A | Patient220B  |
| 971 | Patient066A | Patient196F  |
| 971 | Patient086C | Patient261D  |
| 971 | Patient126C | Patient220B  |
| 971 | Patient220B | Patient224B  |
| 971 | Patient220B | Patient230E  |
| 972 | Patient032A | Patient086C  |
| 972 | Patient086A | Patient261D  |
| 972 | Patient220B | Patient230F  |
| 973 | Patient066A | Patient149A  |
| 973 | Patient192D | Patient242   |
| 974 | Patient066D | Patient086C  |
| 974 | Patient086B | Patient261D  |
| 974 | Patient086C | Patient145C  |
| 974 | Patient161B | Patient220B  |
| 974 | Patient164  | Patient241   |
| 974 | Patient220B | Patient230D  |
| 975 | Patient066D | Patient086A  |

|     |              |              |
|-----|--------------|--------------|
| 975 | Patient086E  | Patient261D  |
| 975 | Patient208   | Patient215   |
| 976 | Patient032A  | Patient086A  |
| 976 | Patient032B  | Patient086C  |
| 976 | Patient081A2 | Patient086C  |
| 976 | Patient081B  | Patient086C  |
| 976 | Patient086A  | Patient145C  |
| 977 | Patient032A  | Patient086E  |
| 977 | Patient034A  | Patient086C  |
| 977 | Patient034D  | Patient086C  |
| 977 | Patient066D  | Patient086E  |
| 977 | Patient081A1 | Patient086C  |
| 978 | Patient032A  | Patient086B  |
| 978 | Patient034B  | Patient086C  |
| 978 | Patient066D  | Patient086B  |
| 978 | Patient086B  | Patient145C  |
| 978 | Patient086E  | Patient145C  |
| 978 | Patient241   | Patient258B  |
| 978 | Patient241   | Patient258D  |
| 978 | Patient241   | Patient258G  |
| 979 | Patient034A  | Patient086A  |
| 979 | Patient034E  | Patient086C  |
| 979 | Patient066E  | Patient086C  |
| 979 | Patient081A1 | Patient086A  |
| 980 | Patient032B  | Patient086A  |
| 980 | Patient034B  | Patient086A  |
| 980 | Patient066E  | Patient086A  |
| 980 | Patient066F  | Patient086C  |
| 980 | Patient081A2 | Patient086A  |
| 980 | Patient081B  | Patient086A  |
| 980 | Patient241   | Patient258F  |
| 981 | Patient032B  | Patient086E  |
| 981 | Patient034A  | Patient086E  |
| 981 | Patient034C  | Patient086C  |
| 981 | Patient034D  | Patient086A  |
| 981 | Patient034E  | Patient086A  |
| 981 | Patient081A1 | Patient086E  |
| 981 | Patient081A2 | Patient086E  |
| 981 | Patient081B  | Patient086E  |
| 981 | Patient103D  | Patient241   |
| 981 | Patient192E  | Patient241   |
| 981 | Patient241   | Patient258A1 |
| 981 | Patient241   | Patient258A2 |
| 981 | Patient242   | Patient258E  |
| 982 | Patient032B  | Patient086B  |
| 982 | Patient034A  | Patient086B  |
| 982 | Patient034B  | Patient086E  |
| 982 | Patient034E  | Patient086E  |
| 982 | Patient054   | Patient158   |
| 982 | Patient081A1 | Patient086B  |

|     |              |             |
|-----|--------------|-------------|
| 982 | Patient081A2 | Patient086B |
| 982 | Patient081B  | Patient086B |
| 982 | Patient081E  | Patient086C |
| 982 | Patient081F  | Patient086C |
| 982 | Patient192F  | Patient241  |
| 983 | Patient034B  | Patient086B |
| 983 | Patient034E  | Patient086B |
| 983 | Patient066E  | Patient086E |
| 983 | Patient066F  | Patient086A |
| 983 | Patient220B  | Patient230A |
| 984 | Patient034D  | Patient086E |
| 984 | Patient066E  | Patient086B |
| 984 | Patient081E  | Patient086A |
| 984 | Patient086C  | Patient224B |
| 985 | Patient034D  | Patient086B |
| 985 | Patient081E  | Patient086E |
| 985 | Patient086A  | Patient141C |
| 985 | Patient086A  | Patient141D |
| 985 | Patient086C  | Patient141C |
| 985 | Patient086C  | Patient141D |
| 986 | Patient034C  | Patient086A |
| 986 | Patient066F  | Patient086E |
| 986 | Patient081E  | Patient086B |
| 986 | Patient081F  | Patient086A |
| 986 | Patient086C  | Patient181A |
| 986 | Patient086E  | Patient141D |
| 986 | Patient103E  | Patient241  |
| 987 | Patient034C  | Patient086B |
| 987 | Patient034C  | Patient086E |
| 987 | Patient066F  | Patient086B |
| 987 | Patient086A  | Patient141B |
| 987 | Patient086A  | Patient181A |
| 987 | Patient086A  | Patient224B |
| 987 | Patient086B  | Patient141D |
| 987 | Patient086C  | Patient141B |
| 987 | Patient086E  | Patient141C |
| 988 | Patient086A  | Patient141A |
| 988 | Patient086B  | Patient141C |
| 988 | Patient086C  | Patient145A |
| 988 | Patient086C  | Patient230E |
| 988 | Patient086E  | Patient141B |
| 988 | Patient086E  | Patient181A |
| 988 | Patient195   | Patient220B |
| 988 | Patient220B  | Patient230B |
| 989 | Patient028   | Patient204  |
| 989 | Patient081F  | Patient086E |
| 989 | Patient086A  | Patient145A |
| 989 | Patient086A  | Patient230E |
| 989 | Patient086B  | Patient141B |
| 989 | Patient086B  | Patient181A |

|      |             |             |
|------|-------------|-------------|
| 989  | Patient086C | Patient141A |
| 989  | Patient086C | Patient230F |
| 989  | Patient086E | Patient141A |
| 989  | Patient086E | Patient224B |
| 989  | Patient204  | Patient222C |
| 990  | Patient026D | Patient220B |
| 990  | Patient081F | Patient086B |
| 990  | Patient086B | Patient141A |
| 990  | Patient086B | Patient224B |
| 990  | Patient086C | Patient181B |
| 990  | Patient086E | Patient145A |
| 990  | Patient103C | Patient220B |
| 990  | Patient158  | Patient205  |
| 991  | Patient086B | Patient145A |
| 991  | Patient086C | Patient230A |
| 991  | Patient086E | Patient230E |
| 992  | Patient086A | Patient230A |
| 992  | Patient086A | Patient230F |
| 992  | Patient086B | Patient230E |
| 992  | Patient103B | Patient220B |
| 993  | Patient086A | Patient181B |
| 993  | Patient086C | Patient103A |
| 993  | Patient086E | Patient230A |
| 993  | Patient086E | Patient230F |
| 993  | Patient235F | Patient242  |
| 994  | Patient086B | Patient230A |
| 994  | Patient086B | Patient230F |
| 994  | Patient086E | Patient181B |
| 995  | Patient045D | Patient204  |
| 995  | Patient086A | Patient103A |
| 995  | Patient086B | Patient181B |
| 996  | Patient026E | Patient220B |
| 996  | Patient150A | Patient220B |
| 997  | Patient150B | Patient220B |
| 997  | Patient204  | Patient252B |
| 997  | Patient235E | Patient242  |
| 998  | Patient074B | Patient086C |
| 998  | Patient150C | Patient220B |
| 998  | Patient204  | Patient252A |
| 999  | Patient074A | Patient086C |
| 999  | Patient074B | Patient235B |
| 999  | Patient086E | Patient103A |
| 1000 | Patient074B | Patient235C |
| 1000 | Patient086B | Patient103A |
| 1000 | Patient086C | Patient230B |
| 1001 | Patient074B | Patient086A |
| 1001 | Patient086A | Patient230B |
| 1001 | Patient204  | Patient263A |
| 1002 | Patient074A | Patient086A |
| 1002 | Patient074A | Patient235B |

|      |             |             |
|------|-------------|-------------|
| 1002 | Patient086C | Patient224A |
| 1002 | Patient086E | Patient230B |
| 1003 | Patient074A | Patient235C |
| 1003 | Patient074B | Patient086E |
| 1003 | Patient074C | Patient086C |
| 1003 | Patient086B | Patient230B |
| 1004 | Patient074B | Patient086B |
| 1004 | Patient086C | Patient120B |
| 1004 | Patient241  | Patient258E |
| 1005 | Patient026C | Patient242  |
| 1005 | Patient074A | Patient086E |
| 1005 | Patient086C | Patient103C |
| 1006 | Patient074A | Patient086B |
| 1006 | Patient074C | Patient086A |
| 1006 | Patient074C | Patient235B |
| 1006 | Patient086A | Patient224A |
| 1006 | Patient121A | Patient164  |
| 1007 | Patient074C | Patient235C |
| 1007 | Patient086A | Patient103C |
| 1007 | Patient086E | Patient224A |
| 1008 | Patient081C | Patient242  |
| 1008 | Patient081D | Patient242  |
| 1008 | Patient086B | Patient224A |
| 1008 | Patient086C | Patient120C |
| 1008 | Patient204  | Patient252F |
| 1009 | Patient054  | Patient094A |
| 1009 | Patient074C | Patient086E |
| 1009 | Patient086A | Patient120B |
| 1009 | Patient196F | Patient204  |
| 1010 | Patient054  | Patient093A |
| 1010 | Patient054  | Patient093E |
| 1010 | Patient074C | Patient086B |
| 1010 | Patient086E | Patient103C |
| 1010 | Patient086E | Patient120B |
| 1011 | Patient054  | Patient149A |
| 1011 | Patient074D | Patient086C |
| 1011 | Patient086A | Patient120C |
| 1011 | Patient086B | Patient103C |
| 1011 | Patient086B | Patient120B |
| 1011 | Patient086C | Patient092G |
| 1011 | Patient086C | Patient195  |
| 1012 | Patient038  | Patient210  |
| 1012 | Patient086C | Patient123A |
| 1012 | Patient086E | Patient120C |
| 1012 | Patient217C | Patient242  |
| 1013 | Patient074D | Patient235B |
| 1013 | Patient086A | Patient092G |
| 1013 | Patient086B | Patient120C |
| 1013 | Patient217D | Patient242  |
| 1014 | Patient054  | Patient094C |



|      |              |             |
|------|--------------|-------------|
| 1014 | Patient066A  | Patient252B |
| 1014 | Patient074D  | Patient086A |
| 1014 | Patient074D  | Patient235C |
| 1014 | Patient081A2 | Patient242  |
| 1014 | Patient081B  | Patient242  |
| 1014 | Patient086A  | Patient195  |
| 1014 | Patient217A  | Patient242  |
| 1014 | Patient217B  | Patient242  |
| 1015 | Patient054   | Patient094B |
| 1015 | Patient074D  | Patient086E |
| 1015 | Patient081A1 | Patient242  |
| 1015 | Patient086A  | Patient123A |
| 1015 | Patient086C  | Patient103B |
| 1015 | Patient086C  | Patient120D |
| 1015 | Patient086C  | Patient123B |
| 1015 | Patient086C  | Patient123C |
| 1015 | Patient086E  | Patient092G |
| 1015 | Patient217E  | Patient242  |
| 1015 | Patient217H  | Patient242  |
| 1016 | Patient026F  | Patient220B |
| 1016 | Patient054   | Patient093D |
| 1016 | Patient066A  | Patient252A |
| 1016 | Patient074D  | Patient086B |
| 1016 | Patient086A  | Patient120D |
| 1016 | Patient086B  | Patient092G |
| 1016 | Patient086E  | Patient123A |
| 1016 | Patient217F  | Patient242  |
| 1017 | Patient026B  | Patient220B |
| 1017 | Patient054   | Patient210  |
| 1017 | Patient074E  | Patient086C |
| 1017 | Patient086A  | Patient126A |
| 1017 | Patient086B  | Patient123A |
| 1017 | Patient086C  | Patient126A |
| 1017 | Patient086E  | Patient195  |
| 1018 | Patient045A  | Patient220B |
| 1018 | Patient074E  | Patient235B |
| 1018 | Patient081E  | Patient242  |
| 1018 | Patient086A  | Patient103B |
| 1018 | Patient086A  | Patient123B |
| 1018 | Patient086A  | Patient123C |
| 1018 | Patient086B  | Patient195  |
| 1018 | Patient086C  | Patient126C |
| 1018 | Patient086E  | Patient126A |
| 1019 | Patient038   | Patient158  |
| 1019 | Patient074E  | Patient235C |
| 1019 | Patient086B  | Patient126A |
| 1019 | Patient086E  | Patient103B |
| 1019 | Patient086E  | Patient120D |
| 1020 | Patient074E  | Patient086A |
| 1020 | Patient086B  | Patient103B |

|      |             |             |
|------|-------------|-------------|
| 1020 | Patient086B | Patient120D |
| 1020 | Patient086E | Patient123C |
| 1020 | Patient217I | Patient242  |
| 1021 | Patient045B | Patient220B |
| 1021 | Patient086A | Patient126C |
| 1021 | Patient086B | Patient123C |
| 1021 | Patient086E | Patient123B |
| 1021 | Patient220B | Patient224A |
| 1022 | Patient045C | Patient220B |
| 1022 | Patient074E | Patient086E |
| 1022 | Patient081F | Patient242  |
| 1022 | Patient086B | Patient123B |
| 1022 | Patient086C | Patient123D |
| 1023 | Patient026A | Patient220B |
| 1023 | Patient038  | Patient189B |
| 1023 | Patient074E | Patient086B |
| 1023 | Patient086A | Patient123D |
| 1024 | Patient086E | Patient123D |
| 1024 | Patient086E | Patient126C |
| 1024 | Patient220B | Patient241  |
| 1025 | Patient038  | Patient189A |
| 1025 | Patient086B | Patient123D |
| 1025 | Patient086B | Patient126C |
| 1025 | Patient086C | Patient173A |
| 1026 | Patient066A | Patient252F |
| 1026 | Patient086A | Patient173A |
| 1026 | Patient217J | Patient242  |
| 1027 | Patient086E | Patient173A |
| 1027 | Patient235F | Patient241  |
| 1028 | Patient086B | Patient173A |
| 1029 | Patient026B | Patient086C |
| 1029 | Patient026F | Patient086C |
| 1029 | Patient038  | Patient094A |
| 1029 | Patient086C | Patient173B |
| 1030 | Patient086A | Patient173B |
| 1030 | Patient235E | Patient241  |
| 1031 | Patient026C | Patient241  |
| 1031 | Patient086E | Patient173B |
| 1031 | Patient141C | Patient242  |
| 1031 | Patient149A | Patient204  |
| 1032 | Patient026B | Patient086A |
| 1032 | Patient026F | Patient086A |
| 1032 | Patient038  | Patient093E |
| 1032 | Patient038  | Patient094B |
| 1032 | Patient086B | Patient173B |
| 1034 | Patient038  | Patient093A |
| 1034 | Patient141A | Patient242  |
| 1034 | Patient220B | Patient242  |
| 1035 | Patient026A | Patient086C |
| 1035 | Patient026B | Patient086E |

|      |              |              |
|------|--------------|--------------|
| 1035 | Patient026F  | Patient086E  |
| 1035 | Patient038   | Patient094C  |
| 1035 | Patient141B  | Patient242   |
| 1036 | Patient026B  | Patient086B  |
| 1036 | Patient026F  | Patient086B  |
| 1037 | Patient038   | Patient189E  |
| 1037 | Patient198   | Patient215   |
| 1038 | Patient026A  | Patient086A  |
| 1038 | Patient038   | Patient108B2 |
| 1038 | Patient205   | Patient222C  |
| 1039 | Patient026A  | Patient086E  |
| 1039 | Patient028   | Patient205   |
| 1039 | Patient038   | Patient108B1 |
| 1039 | Patient230D  | Patient242   |
| 1040 | Patient026A  | Patient086B  |
| 1040 | Patient066A  | Patient210   |
| 1041 | Patient038   | Patient108A  |
| 1041 | Patient054   | Patient079C  |
| 1042 | Patient038   | Patient093D  |
| 1043 | Patient038   | Patient079C  |
| 1043 | Patient081C  | Patient241   |
| 1043 | Patient081D  | Patient241   |
| 1043 | Patient217C  | Patient241   |
| 1044 | Patient045D  | Patient205   |
| 1044 | Patient054   | Patient079A1 |
| 1044 | Patient054   | Patient079A2 |
| 1044 | Patient054   | Patient093B  |
| 1044 | Patient054   | Patient126D  |
| 1044 | Patient094A  | Patient204   |
| 1044 | Patient213A  | Patient242   |
| 1044 | Patient217D  | Patient241   |
| 1045 | Patient038   | Patient157   |
| 1045 | Patient038   | Patient213B  |
| 1045 | Patient054   | Patient079B  |
| 1045 | Patient054   | Patient093C  |
| 1045 | Patient054   | Patient108B2 |
| 1046 | Patient038   | Patient079A1 |
| 1046 | Patient038   | Patient079A2 |
| 1046 | Patient205   | Patient252A  |
| 1046 | Patient217B  | Patient241   |
| 1046 | Patient217E  | Patient241   |
| 1046 | Patient217H  | Patient241   |
| 1047 | Patient038   | Patient093B  |
| 1047 | Patient054   | Patient100A  |
| 1047 | Patient054   | Patient213B  |
| 1047 | Patient081A1 | Patient241   |
| 1047 | Patient126C  | Patient242   |
| 1047 | Patient205   | Patient252B  |
| 1047 | Patient205   | Patient263A  |
| 1047 | Patient217A  | Patient241   |

|      |              |              |
|------|--------------|--------------|
| 1047 | Patient217F  | Patient241   |
| 1048 | Patient038   | Patient108D  |
| 1048 | Patient081B  | Patient241   |
| 1049 | Patient038   | Patient109A  |
| 1049 | Patient054   | Patient108B1 |
| 1049 | Patient054   | Patient157   |
| 1049 | Patient081A2 | Patient241   |
| 1049 | Patient230A  | Patient242   |
| 1049 | Patient230F  | Patient242   |
| 1050 | Patient054   | Patient108A  |
| 1050 | Patient161B  | Patient242   |
| 1051 | Patient038   | Patient093C  |
| 1051 | Patient038   | Patient108G  |
| 1051 | Patient038   | Patient108H  |
| 1051 | Patient038   | Patient109B  |
| 1051 | Patient038   | Patient126D  |
| 1051 | Patient054   | Patient094D  |
| 1051 | Patient131   | Patient204   |
| 1051 | Patient217I  | Patient241   |
| 1052 | Patient038   | Patient109C  |
| 1052 | Patient054   | Patient094E  |
| 1052 | Patient066A  | Patient094A  |
| 1052 | Patient081E  | Patient241   |
| 1052 | Patient093E  | Patient204   |
| 1053 | Patient038   | Patient079B  |
| 1053 | Patient038   | Patient109D  |
| 1053 | Patient066A  | Patient093A  |
| 1053 | Patient066A  | Patient093E  |
| 1053 | Patient093A  | Patient204   |
| 1053 | Patient230E  | Patient242   |
| 1054 | Patient230B  | Patient242   |
| 1055 | Patient038   | Patient108F  |
| 1055 | Patient038   | Patient109E  |
| 1055 | Patient038   | Patient236B  |
| 1055 | Patient054   | Patient108D  |
| 1055 | Patient066A  | Patient246A  |
| 1055 | Patient081F  | Patient241   |
| 1055 | Patient094B  | Patient204   |
| 1056 | Patient038   | Patient094D  |
| 1056 | Patient038   | Patient127A  |
| 1056 | Patient054   | Patient109A  |
| 1056 | Patient196F  | Patient205   |
| 1056 | Patient204   | Patient247A  |
| 1057 | Patient038   | Patient126E  |
| 1057 | Patient038   | Patient236A  |
| 1057 | Patient045A  | Patient242   |
| 1057 | Patient066A  | Patient094C  |
| 1057 | Patient066A  | Patient131   |
| 1057 | Patient094C  | Patient204   |
| 1057 | Patient204   | Patient247B  |

|      |             |              |
|------|-------------|--------------|
| 1057 | Patient204  | Patient247D  |
| 1057 | Patient205  | Patient252F  |
| 1058 | Patient054  | Patient108F  |
| 1058 | Patient054  | Patient108G  |
| 1058 | Patient054  | Patient127A  |
| 1058 | Patient066A | Patient094B  |
| 1058 | Patient204  | Patient247C  |
| 1058 | Patient217J | Patient241   |
| 1059 | Patient038  | Patient097A  |
| 1059 | Patient038  | Patient097E  |
| 1059 | Patient038  | Patient265   |
| 1059 | Patient045B | Patient242   |
| 1059 | Patient054  | Patient109B  |
| 1059 | Patient054  | Patient109C  |
| 1059 | Patient054  | Patient109D  |
| 1059 | Patient086C | Patient092C  |
| 1059 | Patient141C | Patient241   |
| 1059 | Patient198  | Patient258C1 |
| 1059 | Patient198  | Patient258C2 |
| 1060 | Patient038  | Patient097D  |
| 1060 | Patient038  | Patient127B  |
| 1060 | Patient038  | Patient184   |
| 1060 | Patient054  | Patient108H  |
| 1060 | Patient054  | Patient109E  |
| 1060 | Patient054  | Patient252D  |
| 1060 | Patient086C | Patient103D  |
| 1061 | Patient038  | Patient100A  |
| 1061 | Patient054  | Patient236B  |
| 1061 | Patient066A | Patient093D  |
| 1061 | Patient086A | Patient092C  |
| 1061 | Patient086A | Patient103D  |
| 1062 | Patient038  | Patient094E  |
| 1062 | Patient045C | Patient242   |
| 1062 | Patient093D | Patient204   |
| 1062 | Patient141A | Patient241   |
| 1062 | Patient204  | Patient247E  |
| 1063 | Patient038  | Patient097C  |
| 1063 | Patient038  | Patient159   |
| 1063 | Patient038  | Patient263B  |
| 1063 | Patient086E | Patient092C  |
| 1063 | Patient141B | Patient241   |
| 1063 | Patient220B | Patient235C  |
| 1064 | Patient054  | Patient127B  |
| 1064 | Patient054  | Patient184   |
| 1064 | Patient054  | Patient246A  |
| 1064 | Patient086B | Patient092C  |
| 1064 | Patient086C | Patient103E  |
| 1064 | Patient086E | Patient103D  |
| 1064 | Patient220B | Patient235B  |
| 1065 | Patient038  | Patient222E  |

|      |              |             |
|------|--------------|-------------|
| 1065 | Patient038   | Patient246A |
| 1065 | Patient054   | Patient189A |
| 1065 | Patient086A  | Patient103E |
| 1065 | Patient086B  | Patient103D |
| 1065 | Patient230D  | Patient241  |
| 1066 | Patient038   | Patient222A |
| 1066 | Patient038   | Patient222B |
| 1066 | Patient054   | Patient097A |
| 1066 | Patient054   | Patient097D |
| 1066 | Patient054   | Patient189B |
| 1066 | Patient054   | Patient236A |
| 1066 | Patient086E  | Patient103E |
| 1067 | Patient038   | Patient097B |
| 1067 | Patient038   | Patient149B |
| 1067 | Patient038   | Patient220A |
| 1067 | Patient038   | Patient222F |
| 1067 | Patient054   | Patient220A |
| 1067 | Patient066A  | Patient247A |
| 1067 | Patient086B  | Patient103E |
| 1068 | Patient054   | Patient097E |
| 1068 | Patient054   | Patient159  |
| 1069 | Patient054   | Patient097C |
| 1069 | Patient054   | Patient222F |
| 1069 | Patient066A  | Patient247B |
| 1069 | Patient066A  | Patient247D |
| 1070 | Patient038   | Patient187  |
| 1070 | Patient054   | Patient126E |
| 1070 | Patient054   | Patient222A |
| 1070 | Patient054   | Patient222B |
| 1070 | Patient054   | Patient265  |
| 1070 | Patient066A  | Patient247C |
| 1070 | Patient066D  | Patient242  |
| 1070 | Patient086C  | Patient092A |
| 1070 | Patient086C  | Patient092D |
| 1071 | Patient054   | Patient097B |
| 1071 | Patient054   | Patient189E |
| 1071 | Patient054   | Patient222E |
| 1071 | Patient066A  | Patient247E |
| 1071 | Patient079C  | Patient204  |
| 1072 | Patient074A  | Patient220B |
| 1072 | Patient074B  | Patient220B |
| 1072 | Patient079A1 | Patient204  |
| 1072 | Patient086C  | Patient092E |
| 1073 | Patient054   | Patient187  |
| 1073 | Patient054   | Patient222D |
| 1073 | Patient079A2 | Patient204  |
| 1073 | Patient086A  | Patient092A |
| 1073 | Patient086A  | Patient092D |
| 1073 | Patient104B  | Patient204  |
| 1073 | Patient126C  | Patient241  |

|      |              |             |
|------|--------------|-------------|
| 1074 | Patient038   | Patient099E |
| 1074 | Patient038   | Patient218A |
| 1074 | Patient054   | Patient149B |
| 1074 | Patient086E  | Patient092A |
| 1074 | Patient086E  | Patient092D |
| 1074 | Patient161B  | Patient241  |
| 1074 | Patient173B  | Patient242  |
| 1075 | Patient038   | Patient099B |
| 1075 | Patient038   | Patient218B |
| 1075 | Patient054   | Patient099A |
| 1075 | Patient054   | Patient247A |
| 1075 | Patient074C  | Patient220B |
| 1075 | Patient086A  | Patient092E |
| 1075 | Patient086B  | Patient092A |
| 1075 | Patient086B  | Patient092D |
| 1075 | Patient204   | Patient210  |
| 1075 | Patient213A  | Patient241  |
| 1076 | Patient038   | Patient201B |
| 1076 | Patient053C  | Patient086C |
| 1076 | Patient054   | Patient196B |
| 1076 | Patient054   | Patient263B |
| 1076 | Patient079B  | Patient204  |
| 1076 | Patient086E  | Patient092E |
| 1076 | Patient230A  | Patient241  |
| 1076 | Patient230F  | Patient241  |
| 1077 | Patient054   | Patient099E |
| 1077 | Patient054   | Patient196A |
| 1077 | Patient054   | Patient218A |
| 1077 | Patient054   | Patient218B |
| 1077 | Patient054   | Patient247B |
| 1077 | Patient086B  | Patient092E |
| 1077 | Patient157   | Patient204  |
| 1078 | Patient038   | Patient196A |
| 1078 | Patient038   | Patient196B |
| 1078 | Patient038   | Patient247A |
| 1078 | Patient038   | Patient252D |
| 1078 | Patient053A2 | Patient086C |
| 1078 | Patient053C  | Patient086A |
| 1078 | Patient054   | Patient099B |
| 1078 | Patient054   | Patient247C |
| 1078 | Patient054   | Patient247D |
| 1078 | Patient108A  | Patient204  |
| 1078 | Patient204   | Patient213B |
| 1079 | Patient038   | Patient201E |
| 1079 | Patient053B  | Patient086C |
| 1079 | Patient054   | Patient196C |
| 1079 | Patient054   | Patient247E |
| 1079 | Patient104A  | Patient204  |
| 1079 | Patient230E  | Patient241  |
| 1080 | Patient038   | Patient099D |

|      |              |              |
|------|--------------|--------------|
| 1080 | Patient038   | Patient201A  |
| 1080 | Patient038   | Patient247B  |
| 1080 | Patient038   | Patient247C  |
| 1080 | Patient038   | Patient247E  |
| 1080 | Patient053C  | Patient086E  |
| 1080 | Patient054   | Patient104B  |
| 1080 | Patient054   | Patient196E  |
| 1080 | Patient086C  | Patient092B  |
| 1080 | Patient086C  | Patient235F  |
| 1080 | Patient108B2 | Patient204   |
| 1080 | Patient149A  | Patient205   |
| 1080 | Patient181A  | Patient242   |
| 1080 | Patient230B  | Patient241   |
| 1081 | Patient038   | Patient104B  |
| 1081 | Patient053A2 | Patient086A  |
| 1081 | Patient053C  | Patient086B  |
| 1081 | Patient086A  | Patient235F  |
| 1081 | Patient093B  | Patient204   |
| 1081 | Patient108B1 | Patient204   |
| 1082 | Patient038   | Patient131   |
| 1082 | Patient038   | Patient222D  |
| 1082 | Patient053A2 | Patient086E  |
| 1082 | Patient053B  | Patient086A  |
| 1082 | Patient054   | Patient104A  |
| 1082 | Patient086E  | Patient235F  |
| 1082 | Patient150A  | Patient242   |
| 1083 | Patient038   | Patient099C  |
| 1083 | Patient038   | Patient196C  |
| 1083 | Patient038   | Patient252A  |
| 1083 | Patient053A2 | Patient086B  |
| 1083 | Patient053B  | Patient086E  |
| 1083 | Patient054   | Patient099D  |
| 1083 | Patient054   | Patient201B  |
| 1083 | Patient086A  | Patient092B  |
| 1083 | Patient086B  | Patient235F  |
| 1083 | Patient150C  | Patient242   |
| 1084 | Patient026D  | Patient242   |
| 1084 | Patient038   | Patient099A  |
| 1084 | Patient038   | Patient104A  |
| 1084 | Patient038   | Patient196E  |
| 1084 | Patient053B  | Patient086B  |
| 1084 | Patient066A  | Patient079C  |
| 1084 | Patient066A  | Patient108B2 |
| 1084 | Patient074D  | Patient220B  |
| 1084 | Patient086C  | Patient235E  |
| 1084 | Patient093C  | Patient204   |
| 1084 | Patient150B  | Patient242   |
| 1085 | Patient038   | Patient196D  |
| 1085 | Patient066A  | Patient079A1 |
| 1085 | Patient086A  | Patient235E  |



|      |             |              |
|------|-------------|--------------|
| 1085 | Patient086E | Patient092B  |
| 1085 | Patient109A | Patient204   |
| 1085 | Patient181B | Patient242   |
| 1086 | Patient054  | Patient099C  |
| 1086 | Patient054  | Patient201A  |
| 1086 | Patient086B | Patient092B  |
| 1086 | Patient086E | Patient235E  |
| 1086 | Patient127A | Patient204   |
| 1087 | Patient038  | Patient252B  |
| 1087 | Patient054  | Patient201E  |
| 1087 | Patient066A | Patient079A2 |
| 1087 | Patient066A | Patient079B  |
| 1087 | Patient066A | Patient093B  |
| 1087 | Patient066A | Patient108B1 |
| 1087 | Patient066A | Patient126D  |
| 1087 | Patient086B | Patient235E  |
| 1087 | Patient086C | Patient092H  |
| 1087 | Patient108D | Patient204   |
| 1088 | Patient038  | Patient247D  |
| 1088 | Patient054  | Patient196D  |
| 1088 | Patient066E | Patient242   |
| 1088 | Patient126A | Patient242   |
| 1088 | Patient204  | Patient252D  |
| 1089 | Patient026E | Patient242   |
| 1089 | Patient045A | Patient241   |
| 1089 | Patient066A | Patient093C  |
| 1089 | Patient066A | Patient104B  |
| 1089 | Patient066A | Patient157   |
| 1089 | Patient094D | Patient204   |
| 1089 | Patient108G | Patient204   |
| 1089 | Patient184  | Patient204   |
| 1090 | Patient086A | Patient092H  |
| 1090 | Patient094A | Patient205   |
| 1090 | Patient109B | Patient204   |
| 1090 | Patient204  | Patient236B  |
| 1091 | Patient054  | Patient131   |
| 1091 | Patient066A | Patient100A  |
| 1091 | Patient066A | Patient213B  |
| 1091 | Patient066F | Patient242   |
| 1091 | Patient074E | Patient220B  |
| 1091 | Patient094E | Patient204   |
| 1091 | Patient097A | Patient204   |
| 1091 | Patient108H | Patient204   |
| 1091 | Patient109D | Patient204   |
| 1091 | Patient204  | Patient236A  |
| 1092 | Patient066A | Patient108A  |
| 1092 | Patient086C | Patient192A  |
| 1092 | Patient086E | Patient092H  |
| 1092 | Patient109C | Patient204   |
| 1092 | Patient109E | Patient204   |

|      |             |             |
|------|-------------|-------------|
| 1092 | Patient127B | Patient204  |
| 1093 | Patient038  | Patient252F |
| 1093 | Patient045B | Patient241  |
| 1093 | Patient054  | Patient252A |
| 1093 | Patient054  | Patient252B |
| 1093 | Patient086B | Patient092H |
| 1093 | Patient224B | Patient242  |
| 1094 | Patient038  | Patient232B |
| 1094 | Patient038  | Patient246C |
| 1094 | Patient045C | Patient241  |
| 1094 | Patient066A | Patient094D |
| 1094 | Patient066A | Patient104A |
| 1094 | Patient066A | Patient246B |
| 1094 | Patient066A | Patient246C |
| 1094 | Patient097D | Patient204  |
| 1094 | Patient097E | Patient204  |
| 1095 | Patient086A | Patient192A |
| 1095 | Patient204  | Patient265  |
| 1096 | Patient086C | Patient192C |
| 1096 | Patient086E | Patient192A |
| 1096 | Patient204  | Patient222B |
| 1097 | Patient054  | Patient232B |
| 1097 | Patient066A | Patient094E |
| 1097 | Patient066A | Patient108D |
| 1097 | Patient066D | Patient241  |
| 1097 | Patient086B | Patient192A |
| 1097 | Patient097C | Patient204  |
| 1097 | Patient131  | Patient205  |
| 1098 | Patient038  | Patient232D |
| 1098 | Patient066A | Patient127A |
| 1098 | Patient086C | Patient192B |
| 1098 | Patient120D | Patient220B |
| 1098 | Patient173B | Patient241  |
| 1098 | Patient204  | Patient220A |
| 1099 | Patient038  | Patient232C |
| 1099 | Patient038  | Patient232E |
| 1099 | Patient066A | Patient109A |
| 1099 | Patient066A | Patient236B |
| 1099 | Patient086A | Patient192C |
| 1099 | Patient204  | Patient222F |
| 1100 | Patient038  | Patient232A |
| 1100 | Patient054  | Patient252F |
| 1100 | Patient066A | Patient108G |
| 1100 | Patient066A | Patient184  |
| 1100 | Patient066A | Patient246E |
| 1100 | Patient086E | Patient192C |
| 1100 | Patient100A | Patient204  |
| 1100 | Patient159  | Patient204  |
| 1100 | Patient204  | Patient222A |
| 1101 | Patient038  | Patient246B |

|      |             |             |
|------|-------------|-------------|
| 1101 | Patient054  | Patient232A |
| 1101 | Patient054  | Patient232E |
| 1101 | Patient066A | Patient109B |
| 1101 | Patient066A | Patient109D |
| 1101 | Patient066A | Patient189A |
| 1101 | Patient066A | Patient222B |
| 1101 | Patient066A | Patient252D |
| 1101 | Patient086A | Patient192B |
| 1101 | Patient086B | Patient192C |
| 1101 | Patient097B | Patient204  |
| 1101 | Patient120B | Patient220B |
| 1101 | Patient120C | Patient220B |
| 1101 | Patient126E | Patient204  |
| 1101 | Patient187  | Patient204  |
| 1101 | Patient204  | Patient222E |
| 1102 | Patient054  | Patient232C |
| 1102 | Patient054  | Patient246C |
| 1102 | Patient066A | Patient108H |
| 1102 | Patient066A | Patient109C |
| 1102 | Patient066A | Patient189B |
| 1102 | Patient066A | Patient236A |
| 1102 | Patient066A | Patient265  |
| 1102 | Patient093E | Patient205  |
| 1102 | Patient204  | Patient218A |
| 1103 | Patient023  | Patient038  |
| 1103 | Patient023  | Patient054  |
| 1103 | Patient054  | Patient232D |
| 1103 | Patient066A | Patient109E |
| 1103 | Patient066A | Patient127B |
| 1103 | Patient086E | Patient192B |
| 1103 | Patient093A | Patient205  |
| 1103 | Patient108F | Patient204  |
| 1103 | Patient204  | Patient218B |
| 1104 | Patient066A | Patient108F |
| 1104 | Patient066A | Patient220A |
| 1104 | Patient086B | Patient192B |
| 1104 | Patient094B | Patient205  |
| 1104 | Patient149B | Patient204  |
| 1104 | Patient204  | Patient263B |
| 1105 | Patient038  | Patient246E |
| 1105 | Patient066A | Patient189E |
| 1105 | Patient126D | Patient204  |
| 1105 | Patient205  | Patient247A |
| 1105 | Patient205  | Patient247C |
| 1105 | Patient205  | Patient247D |
| 1106 | Patient038  | Patient246D |
| 1106 | Patient066A | Patient222F |
| 1106 | Patient181A | Patient241  |
| 1106 | Patient205  | Patient247B |
| 1107 | Patient066A | Patient097A |

|      |             |             |
|------|-------------|-------------|
| 1107 | Patient066A | Patient126E |
| 1107 | Patient066A | Patient246D |
| 1107 | Patient086C | Patient235B |
| 1107 | Patient099A | Patient204  |
| 1107 | Patient103C | Patient242  |
| 1107 | Patient204  | Patient222D |
| 1108 | Patient066A | Patient159  |
| 1108 | Patient066A | Patient187  |
| 1108 | Patient066A | Patient222A |
| 1108 | Patient066A | Patient222D |
| 1108 | Patient074B | Patient242  |
| 1108 | Patient094C | Patient205  |
| 1108 | Patient099B | Patient204  |
| 1108 | Patient099E | Patient204  |
| 1109 | Patient054  | Patient246B |
| 1109 | Patient054  | Patient246E |
| 1109 | Patient066A | Patient097D |
| 1109 | Patient066A | Patient222E |
| 1109 | Patient086C | Patient235C |
| 1110 | Patient066A | Patient097E |
| 1110 | Patient086A | Patient235B |
| 1110 | Patient086A | Patient235C |
| 1110 | Patient093D | Patient205  |
| 1110 | Patient201B | Patient204  |
| 1110 | Patient205  | Patient247E |
| 1110 | Patient235A | Patient242  |
| 1111 | Patient066A | Patient149B |
| 1111 | Patient074A | Patient242  |
| 1111 | Patient086E | Patient235B |
| 1111 | Patient086E | Patient235C |
| 1111 | Patient196B | Patient204  |
| 1111 | Patient201A | Patient204  |
| 1112 | Patient026D | Patient241  |
| 1112 | Patient054  | Patient246D |
| 1112 | Patient066A | Patient097C |
| 1112 | Patient086B | Patient235B |
| 1112 | Patient086B | Patient235C |
| 1112 | Patient086C | Patient192F |
| 1112 | Patient196A | Patient204  |
| 1113 | Patient066A | Patient263B |
| 1113 | Patient086C | Patient192E |
| 1113 | Patient103B | Patient242  |
| 1114 | Patient066A | Patient218A |
| 1114 | Patient086A | Patient192F |
| 1114 | Patient099C | Patient204  |
| 1114 | Patient173A | Patient242  |
| 1114 | Patient181B | Patient241  |
| 1114 | Patient201E | Patient204  |
| 1115 | Patient066A | Patient097B |
| 1115 | Patient066A | Patient218B |

|      |              |             |
|------|--------------|-------------|
| 1115 | Patient074C  | Patient242  |
| 1115 | Patient099D  | Patient204  |
| 1115 | Patient126A  | Patient241  |
| 1115 | Patient150A  | Patient241  |
| 1115 | Patient196C  | Patient204  |
| 1116 | Patient026E  | Patient241  |
| 1116 | Patient066A  | Patient099A |
| 1116 | Patient066A  | Patient099E |
| 1116 | Patient066E  | Patient241  |
| 1116 | Patient086A  | Patient192E |
| 1116 | Patient150C  | Patient241  |
| 1117 | Patient066A  | Patient196A |
| 1117 | Patient079C  | Patient205  |
| 1117 | Patient150B  | Patient241  |
| 1117 | Patient196E  | Patient204  |
| 1117 | Patient205   | Patient210  |
| 1118 | Patient026F  | Patient242  |
| 1118 | Patient066A  | Patient196B |
| 1118 | Patient086E  | Patient192E |
| 1118 | Patient086E  | Patient192F |
| 1118 | Patient224B  | Patient241  |
| 1119 | Patient066A  | Patient099B |
| 1119 | Patient066F  | Patient241  |
| 1119 | Patient086B  | Patient192E |
| 1119 | Patient086B  | Patient192F |
| 1119 | Patient104B  | Patient205  |
| 1119 | Patient120A  | Patient241  |
| 1120 | Patient026B  | Patient242  |
| 1120 | Patient079A1 | Patient205  |
| 1120 | Patient224A  | Patient242  |
| 1121 | Patient026A  | Patient242  |
| 1121 | Patient074D  | Patient242  |
| 1121 | Patient079A2 | Patient205  |
| 1122 | Patient157   | Patient205  |
| 1123 | Patient066A  | Patient099D |
| 1123 | Patient066A  | Patient196C |
| 1124 | Patient066A  | Patient099C |
| 1124 | Patient066A  | Patient196E |
| 1124 | Patient066A  | Patient201B |
| 1124 | Patient079B  | Patient205  |
| 1124 | Patient205   | Patient213B |
| 1125 | Patient104A  | Patient205  |
| 1125 | Patient196D  | Patient204  |
| 1126 | Patient066A  | Patient201A |
| 1126 | Patient074E  | Patient242  |
| 1127 | Patient108A  | Patient205  |
| 1128 | Patient023   | Patient066A |
| 1128 | Patient066A  | Patient196D |
| 1128 | Patient066A  | Patient201E |
| 1128 | Patient093B  | Patient205  |

|      |              |             |
|------|--------------|-------------|
| 1129 | Patient108B2 | Patient205  |
| 1130 | Patient108B1 | Patient205  |
| 1130 | Patient204   | Patient232B |
| 1131 | Patient093C  | Patient205  |
| 1133 | Patient127A  | Patient205  |
| 1133 | Patient204   | Patient232A |
| 1133 | Patient204   | Patient232E |
| 1134 | Patient066A  | Patient232B |
| 1134 | Patient103C  | Patient241  |
| 1134 | Patient109A  | Patient205  |
| 1135 | Patient023   | Patient204  |
| 1135 | Patient108D  | Patient205  |
| 1135 | Patient204   | Patient232C |
| 1135 | Patient204   | Patient232D |
| 1136 | Patient184   | Patient205  |
| 1136 | Patient205   | Patient236B |
| 1137 | Patient066A  | Patient232A |
| 1137 | Patient066A  | Patient232D |
| 1137 | Patient066A  | Patient232E |
| 1137 | Patient094D  | Patient205  |
| 1137 | Patient108G  | Patient205  |
| 1137 | Patient109B  | Patient205  |
| 1137 | Patient205   | Patient252D |
| 1138 | Patient066A  | Patient232C |
| 1138 | Patient074B  | Patient241  |
| 1138 | Patient108H  | Patient205  |
| 1138 | Patient127B  | Patient205  |
| 1138 | Patient205   | Patient236A |
| 1139 | Patient109C  | Patient205  |
| 1139 | Patient173A  | Patient241  |
| 1140 | Patient094E  | Patient205  |
| 1140 | Patient097A  | Patient205  |
| 1140 | Patient097E  | Patient205  |
| 1140 | Patient103B  | Patient241  |
| 1140 | Patient109D  | Patient205  |
| 1140 | Patient235A  | Patient241  |
| 1141 | Patient205   | Patient265  |
| 1142 | Patient074A  | Patient241  |
| 1142 | Patient097D  | Patient205  |
| 1142 | Patient109E  | Patient205  |
| 1144 | Patient205   | Patient222B |
| 1145 | Patient097C  | Patient205  |
| 1145 | Patient159   | Patient205  |
| 1146 | Patient026B  | Patient241  |
| 1146 | Patient074C  | Patient241  |
| 1146 | Patient100A  | Patient205  |
| 1146 | Patient120A  | Patient242  |
| 1146 | Patient205   | Patient220A |
| 1147 | Patient021A1 | Patient204  |
| 1147 | Patient021A2 | Patient204  |

|      |              |             |
|------|--------------|-------------|
| 1147 | Patient026A  | Patient241  |
| 1147 | Patient026F  | Patient241  |
| 1147 | Patient205   | Patient222E |
| 1147 | Patient205   | Patient222F |
| 1148 | Patient126E  | Patient205  |
| 1148 | Patient187   | Patient205  |
| 1148 | Patient224A  | Patient241  |
| 1150 | Patient205   | Patient222A |
| 1150 | Patient205   | Patient263B |
| 1151 | Patient097B  | Patient205  |
| 1151 | Patient149B  | Patient205  |
| 1151 | Patient205   | Patient218A |
| 1152 | Patient074D  | Patient241  |
| 1152 | Patient108F  | Patient205  |
| 1152 | Patient126D  | Patient205  |
| 1152 | Patient205   | Patient218B |
| 1153 | Patient099E  | Patient205  |
| 1154 | Patient099A  | Patient205  |
| 1154 | Patient099B  | Patient205  |
| 1154 | Patient205   | Patient222D |
| 1156 | Patient074E  | Patient241  |
| 1157 | Patient196B  | Patient205  |
| 1158 | Patient196A  | Patient205  |
| 1159 | Patient099D  | Patient205  |
| 1159 | Patient201B  | Patient205  |
| 1160 | Patient021A1 | Patient066A |
| 1160 | Patient099C  | Patient205  |
| 1161 | Patient021A2 | Patient066A |
| 1162 | Patient196C  | Patient205  |
| 1162 | Patient201A  | Patient205  |
| 1162 | Patient201E  | Patient205  |
| 1163 | Patient189A  | Patient204  |
| 1163 | Patient196E  | Patient205  |
| 1164 | Patient189B  | Patient204  |
| 1167 | Patient189E  | Patient204  |
| 1170 | Patient196D  | Patient205  |
| 1176 | Patient021A2 | Patient038  |
| 1177 | Patient021A1 | Patient038  |
| 1177 | Patient205   | Patient232B |
| 1180 | Patient205   | Patient232C |
| 1181 | Patient205   | Patient232A |
| 1181 | Patient205   | Patient232E |
| 1182 | Patient023   | Patient205  |
| 1182 | Patient205   | Patient232D |
| 1184 | Patient021A2 | Patient054  |
| 1184 | Patient195   | Patient241  |
| 1187 | Patient021A1 | Patient054  |
| 1191 | Patient021A1 | Patient205  |
| 1193 | Patient021A2 | Patient205  |
| 1210 | Patient189B  | Patient205  |

|      |              |             |
|------|--------------|-------------|
| 1212 | Patient189A  | Patient205  |
| 1216 | Patient189E  | Patient205  |
| 1222 | Patient235B  | Patient242  |
| 1224 | Patient235C  | Patient242  |
| 1230 | Patient120D  | Patient241  |
| 1242 | Patient120B  | Patient241  |
| 1242 | Patient120C  | Patient241  |
| 1248 | Patient195   | Patient242  |
| 1252 | Patient235B  | Patient241  |
| 1254 | Patient235C  | Patient241  |
| 1257 | Patient120D  | Patient242  |
| 1268 | Patient120B  | Patient242  |
| 1268 | Patient120C  | Patient242  |
| 1353 | Patient191   | Patient254  |
| 1409 | Patient204   | Patient246A |
| 1452 | Patient204   | Patient246C |
| 1454 | Patient204   | Patient246B |
| 1456 | Patient204   | Patient246E |
| 1459 | Patient205   | Patient246A |
| 1465 | Patient204   | Patient246D |
| 1501 | Patient205   | Patient246C |
| 1505 | Patient205   | Patient246B |
| 1507 | Patient205   | Patient246E |
| 1514 | Patient205   | Patient246D |
| 5957 | Patient149A  | Patient242  |
| 5972 | Patient149A  | Patient241  |
| 6192 | Patient133   | Patient149A |
| 6234 | Patient149A  | Patient251  |
| 6239 | Patient149A  | Patient167  |
| 6245 | Patient090   | Patient149A |
| 6312 | Patient149A  | Patient207  |
| 6320 | Patient145B  | Patient149A |
| 6324 | Patient141G  | Patient149A |
| 6329 | Patient149A  | Patient176  |
| 6329 | Patient149A  | Patient230C |
| 6334 | Patient032E  | Patient149A |
| 6335 | Patient149A  | Patient230G |
| 6336 | Patient032C  | Patient149A |
| 6342 | Patient149A  | Patient261G |
| 6344 | Patient149A  | Patient261E |
| 6347 | Patient141F  | Patient149A |
| 6349 | Patient149A  | Patient261C |
| 6355 | Patient149A  | Patient183A |
| 6368 | Patient149A  | Patient183C |
| 6371 | Patient149A  | Patient183D |
| 6373 | Patient149A  | Patient183B |
| 6375 | Patient149A  | Patient183E |
| 6383 | Patient149A  | Patient206  |
| 6423 | Patient053A1 | Patient149A |
| 6437 | Patient149A  | Patient177  |



|      |              |              |
|------|--------------|--------------|
| 6443 | Patient032D  | Patient149A  |
| 6459 | Patient149A  | Patient164   |
| 6493 | Patient149A  | Patient258A1 |
| 6493 | Patient149A  | Patient258D  |
| 6495 | Patient149A  | Patient258B  |
| 6496 | Patient149A  | Patient258G  |
| 6497 | Patient149A  | Patient258F  |
| 6500 | Patient149A  | Patient258A2 |
| 6502 | Patient086C  | Patient149A  |
| 6514 | Patient022B  | Patient149A  |
| 6514 | Patient086A  | Patient149A  |
| 6518 | Patient086B  | Patient149A  |
| 6518 | Patient086E  | Patient149A  |
| 6533 | Patient081C  | Patient149A  |
| 6535 | Patient081D  | Patient149A  |
| 6538 | Patient149A  | Patient235F  |
| 6541 | Patient149A  | Patient235E  |
| 6545 | Patient092C  | Patient149A  |
| 6563 | Patient149A  | Patient213A  |
| 6566 | Patient045A  | Patient149A  |
| 6572 | Patient045B  | Patient149A  |
| 6573 | Patient045C  | Patient149A  |
| 6582 | Patient032B  | Patient149A  |
| 6582 | Patient149A  | Patient230D  |
| 6584 | Patient053C  | Patient149A  |
| 6585 | Patient145C  | Patient149A  |
| 6586 | Patient053A2 | Patient149A  |
| 6587 | Patient053B  | Patient149A  |
| 6589 | Patient092D  | Patient149A  |
| 6589 | Patient149A  | Patient261A  |
| 6591 | Patient026D  | Patient149A  |
| 6593 | Patient032A  | Patient149A  |
| 6594 | Patient034C  | Patient149A  |
| 6595 | Patient034A  | Patient149A  |
| 6595 | Patient149A  | Patient161B  |
| 6596 | Patient026E  | Patient149A  |
| 6596 | Patient149A  | Patient261D  |
| 6597 | Patient034E  | Patient149A  |
| 6597 | Patient141D  | Patient149A  |
| 6597 | Patient149A  | Patient261B  |
| 6598 | Patient034B  | Patient149A  |
| 6599 | Patient034D  | Patient149A  |
| 6602 | Patient149A  | Patient150C  |
| 6603 | Patient145A  | Patient149A  |
| 6605 | Patient149A  | Patient150A  |
| 6611 | Patient123A  | Patient149A  |
| 6615 | Patient123C  | Patient149A  |
| 6615 | Patient149A  | Patient150B  |
| 6618 | Patient123B  | Patient149A  |
| 6624 | Patient123D  | Patient149A  |

|      |              |             |
|------|--------------|-------------|
| 6626 | Patient092G  | Patient149A |
| 6661 | Patient149A  | Patient220B |
| 6669 | Patient103A  | Patient149A |
| 6684 | Patient149A  | Patient235A |
| 6693 | Patient121A  | Patient149A |
| 6693 | Patient149A  | Patient192A |
| 6694 | Patient149A  | Patient192B |
| 6695 | Patient121B  | Patient149A |
| 6697 | Patient149A  | Patient192C |
| 6707 | Patient149A  | Patient192E |
| 6713 | Patient092H  | Patient149A |
| 6713 | Patient149A  | Patient192F |
| 6715 | Patient092A  | Patient149A |
| 6716 | Patient092E  | Patient149A |
| 6718 | Patient092B  | Patient149A |
| 6728 | Patient149A  | Patient192D |
| 6731 | Patient103D  | Patient149A |
| 6736 | Patient103E  | Patient149A |
| 6770 | Patient026C  | Patient149A |
| 6772 | Patient149A  | Patient258E |
| 6777 | Patient149A  | Patient217A |
| 6779 | Patient149A  | Patient217C |
| 6780 | Patient149A  | Patient217B |
| 6780 | Patient149A  | Patient217E |
| 6781 | Patient149A  | Patient217D |
| 6781 | Patient149A  | Patient217F |
| 6782 | Patient149A  | Patient217H |
| 6782 | Patient149A  | Patient217I |
| 6788 | Patient081B  | Patient149A |
| 6788 | Patient149A  | Patient235C |
| 6789 | Patient081E  | Patient149A |
| 6789 | Patient149A  | Patient217J |
| 6789 | Patient149A  | Patient235B |
| 6790 | Patient081A2 | Patient149A |
| 6792 | Patient081F  | Patient149A |
| 6795 | Patient081A1 | Patient149A |
| 6796 | Patient126C  | Patient149A |
| 6815 | Patient141A  | Patient149A |
| 6816 | Patient141C  | Patient149A |
| 6818 | Patient149A  | Patient173B |
| 6819 | Patient141B  | Patient149A |
| 6825 | Patient149A  | Patient230A |
| 6828 | Patient149A  | Patient230E |
| 6830 | Patient149A  | Patient230F |
| 6834 | Patient149A  | Patient230B |
| 6842 | Patient126A  | Patient149A |
| 6846 | Patient066D  | Patient149A |
| 6856 | Patient026F  | Patient149A |
| 6857 | Patient066E  | Patient149A |
| 6857 | Patient066F  | Patient149A |

|      |             |             |
|------|-------------|-------------|
| 6859 | Patient026B | Patient149A |
| 6862 | Patient026A | Patient149A |
| 6870 | Patient149A | Patient181A |
| 6870 | Patient149A | Patient224B |
| 6871 | Patient149A | Patient181B |
| 6875 | Patient149A | Patient173A |
| 6914 | Patient103B | Patient149A |
| 6914 | Patient103C | Patient149A |
| 6915 | Patient149A | Patient224A |
| 6935 | Patient120A | Patient149A |
| 6996 | Patient149A | Patient195  |
| 7024 | Patient120D | Patient149A |
| 7034 | Patient074B | Patient149A |
| 7035 | Patient074A | Patient149A |
| 7036 | Patient120B | Patient149A |
| 7037 | Patient074C | Patient149A |
| 7039 | Patient074D | Patient149A |
| 7040 | Patient120C | Patient149A |
| 7046 | Patient074E | Patient149A |
| 7766 | Patient072  | Patient149A |
| 7832 | Patient022A | Patient149A |
| 8094 | Patient013  | Patient149A |
| 8259 | Patient055  | Patient149A |
| 8366 | Patient075  | Patient149A |
| 8413 | Patient091A | Patient149A |
| 8453 | Patient033  | Patient149A |
| 8453 | Patient149A | Patient194  |
| 8551 | Patient128  | Patient149A |
| 8645 | Patient031  | Patient149A |
| 8804 | Patient007A | Patient149A |
| 8810 | Patient007B | Patient149A |
| 8835 | Patient149A | Patient202  |
| 9181 | Patient072  | Patient075  |
| 9213 | Patient022A | Patient072  |
| 9220 | Patient013  | Patient075  |
| 9240 | Patient022A | Patient028  |
| 9258 | Patient022A | Patient196F |
| 9263 | Patient022A | Patient222C |
| 9267 | Patient022A | Patient263A |
| 9270 | Patient022A | Patient045D |
| 9281 | Patient022A | Patient038  |
| 9312 | Patient022A | Patient210  |
| 9318 | Patient022A | Patient066A |
| 9328 | Patient022A | Patient093A |
| 9329 | Patient022A | Patient093B |
| 9333 | Patient022A | Patient093D |
| 9334 | Patient022A | Patient094B |
| 9335 | Patient022A | Patient093C |
| 9335 | Patient022A | Patient094C |
| 9335 | Patient022A | Patient100A |

|      |              |              |
|------|--------------|--------------|
| 9336 | Patient022A  | Patient094A  |
| 9337 | Patient022A  | Patient094D  |
| 9339 | Patient013   | Patient022A  |
| 9339 | Patient022A  | Patient093E  |
| 9341 | Patient038   | Patient072   |
| 9342 | Patient022A  | Patient213B  |
| 9343 | Patient022A  | Patient094E  |
| 9344 | Patient072   | Patient100A  |
| 9345 | Patient066A  | Patient072   |
| 9353 | Patient022A  | Patient054   |
| 9356 | Patient022A  | Patient104B  |
| 9357 | Patient022A  | Patient104A  |
| 9358 | Patient072   | Patient093C  |
| 9361 | Patient022A  | Patient189A  |
| 9361 | Patient022A  | Patient189B  |
| 9361 | Patient022A  | Patient189E  |
| 9363 | Patient022A  | Patient158   |
| 9364 | Patient022A  | Patient202   |
| 9364 | Patient072   | Patient093D  |
| 9365 | Patient045D  | Patient072   |
| 9365 | Patient072   | Patient094A  |
| 9366 | Patient072   | Patient093B  |
| 9369 | Patient022A  | Patient108B2 |
| 9370 | Patient072   | Patient220A  |
| 9371 | Patient072   | Patient093A  |
| 9373 | Patient022A  | Patient108B1 |
| 9373 | Patient072   | Patient093E  |
| 9374 | Patient072   | Patient094D  |
| 9374 | Patient072   | Patient104A  |
| 9374 | Patient072   | Patient213B  |
| 9375 | Patient072   | Patient079A2 |
| 9375 | Patient072   | Patient094E  |
| 9376 | Patient022A  | Patient232B  |
| 9376 | Patient072   | Patient079C  |
| 9376 | Patient072   | Patient189A  |
| 9377 | Patient072   | Patient094C  |
| 9377 | Patient072   | Patient189E  |
| 9378 | Patient021A2 | Patient072   |
| 9378 | Patient054   | Patient072   |
| 9378 | Patient072   | Patient094B  |
| 9378 | Patient072   | Patient104B  |
| 9379 | Patient022A  | Patient099E  |
| 9379 | Patient022A  | Patient236B  |
| 9379 | Patient072   | Patient079A1 |
| 9379 | Patient072   | Patient097A  |
| 9379 | Patient072   | Patient189B  |
| 9379 | Patient072   | Patient236B  |
| 9380 | Patient072   | Patient079B  |
| 9380 | Patient072   | Patient097D  |
| 9380 | Patient072   | Patient108B2 |

|      |              |              |
|------|--------------|--------------|
| 9381 | Patient021A1 | Patient072   |
| 9381 | Patient022A  | Patient220A  |
| 9381 | Patient022A  | Patient232D  |
| 9381 | Patient022A  | Patient232E  |
| 9381 | Patient072   | Patient196F  |
| 9381 | Patient146   | Patient149A  |
| 9382 | Patient022A  | Patient127A  |
| 9382 | Patient072   | Patient108A  |
| 9383 | Patient022A  | Patient236A  |
| 9383 | Patient072   | Patient263A  |
| 9384 | Patient022A  | Patient252D  |
| 9384 | Patient072   | Patient097C  |
| 9384 | Patient072   | Patient108B1 |
| 9385 | Patient022A  | Patient232C  |
| 9385 | Patient072   | Patient099E  |
| 9385 | Patient072   | Patient108D  |
| 9385 | Patient072   | Patient109A  |
| 9385 | Patient072   | Patient109D  |
| 9385 | Patient072   | Patient109E  |
| 9386 | Patient022A  | Patient099A  |
| 9386 | Patient022A  | Patient127B  |
| 9386 | Patient072   | Patient097B  |
| 9386 | Patient072   | Patient108G  |
| 9387 | Patient022A  | Patient126E  |
| 9387 | Patient022A  | Patient157   |
| 9387 | Patient022A  | Patient232A  |
| 9387 | Patient022A  | Patient265   |
| 9387 | Patient072   | Patient222C  |
| 9388 | Patient022A  | Patient097D  |
| 9388 | Patient022A  | Patient099C  |
| 9388 | Patient022A  | Patient247D  |
| 9388 | Patient072   | Patient109C  |
| 9388 | Patient072   | Patient252D  |
| 9389 | Patient021A1 | Patient022A  |
| 9389 | Patient022A  | Patient097A  |
| 9389 | Patient072   | Patient097E  |
| 9389 | Patient072   | Patient108F  |
| 9389 | Patient072   | Patient232B  |
| 9389 | Patient072   | Patient236A  |
| 9389 | Patient072   | Patient252A  |
| 9390 | Patient022A  | Patient097B  |
| 9390 | Patient022A  | Patient097E  |
| 9390 | Patient022A  | Patient099B  |
| 9390 | Patient022A  | Patient099D  |
| 9390 | Patient022A  | Patient196A  |
| 9390 | Patient072   | Patient127A  |
| 9390 | Patient072   | Patient204   |
| 9390 | Patient072   | Patient210   |
| 9390 | Patient072   | Patient222B  |
| 9390 | Patient072   | Patient252B  |

|      |              |             |
|------|--------------|-------------|
| 9390 | Patient072   | Patient265  |
| 9391 | Patient021A2 | Patient022A |
| 9391 | Patient022A  | Patient196B |
| 9391 | Patient028   | Patient072  |
| 9391 | Patient072   | Patient158  |
| 9392 | Patient022A  | Patient222B |
| 9392 | Patient072   | Patient109B |
| 9392 | Patient072   | Patient196E |
| 9393 | Patient022A  | Patient187  |
| 9393 | Patient072   | Patient108H |
| 9393 | Patient072   | Patient196A |
| 9393 | Patient072   | Patient232D |
| 9393 | Patient072   | Patient232E |
| 9394 | Patient013   | Patient094A |
| 9394 | Patient022A  | Patient108D |
| 9394 | Patient022A  | Patient159  |
| 9394 | Patient022A  | Patient252A |
| 9394 | Patient072   | Patient232A |
| 9394 | Patient072   | Patient252F |
| 9395 | Patient022A  | Patient108G |
| 9395 | Patient022A  | Patient108H |
| 9395 | Patient022A  | Patient109A |
| 9395 | Patient022A  | Patient184  |
| 9395 | Patient022A  | Patient196D |
| 9395 | Patient022A  | Patient218A |
| 9395 | Patient022A  | Patient222F |
| 9395 | Patient072   | Patient184  |
| 9395 | Patient072   | Patient196C |
| 9396 | Patient013   | Patient066A |
| 9396 | Patient022A  | Patient097C |
| 9396 | Patient022A  | Patient108A |
| 9396 | Patient022A  | Patient109C |
| 9396 | Patient022A  | Patient196C |
| 9396 | Patient022A  | Patient196E |
| 9396 | Patient072   | Patient222A |
| 9396 | Patient072   | Patient232C |
| 9397 | Patient022A  | Patient222A |
| 9397 | Patient022A  | Patient252F |
| 9397 | Patient072   | Patient127B |
| 9398 | Patient072   | Patient099B |
| 9398 | Patient072   | Patient159  |
| 9398 | Patient072   | Patient218A |
| 9398 | Patient072   | Patient247D |
| 9399 | Patient013   | Patient093D |
| 9399 | Patient022A  | Patient109B |
| 9399 | Patient022A  | Patient222D |
| 9399 | Patient022A  | Patient222E |
| 9399 | Patient072   | Patient157  |
| 9399 | Patient072   | Patient187  |
| 9399 | Patient072   | Patient196B |

|      |             |              |
|------|-------------|--------------|
| 9399 | Patient072  | Patient263B  |
| 9400 | Patient022A | Patient109E  |
| 9400 | Patient022A | Patient131   |
| 9400 | Patient022A | Patient252B  |
| 9400 | Patient072  | Patient196D  |
| 9401 | Patient022A | Patient109D  |
| 9401 | Patient022A | Patient201B  |
| 9402 | Patient013  | Patient093A  |
| 9402 | Patient022A | Patient108F  |
| 9402 | Patient022A | Patient149B  |
| 9402 | Patient072  | Patient099A  |
| 9402 | Patient072  | Patient222E  |
| 9403 | Patient022A | Patient126D  |
| 9403 | Patient022A | Patient204   |
| 9403 | Patient022A | Patient218B  |
| 9403 | Patient072  | Patient222D  |
| 9404 | Patient013  | Patient093E  |
| 9404 | Patient022A | Patient263B  |
| 9404 | Patient072  | Patient201B  |
| 9404 | Patient072  | Patient218B  |
| 9404 | Patient072  | Patient222F  |
| 9405 | Patient022A | Patient246A  |
| 9405 | Patient022A | Patient246C  |
| 9405 | Patient072  | Patient126E  |
| 9406 | Patient072  | Patient099C  |
| 9406 | Patient072  | Patient149B  |
| 9407 | Patient013  | Patient038   |
| 9407 | Patient022A | Patient079A2 |
| 9407 | Patient022A | Patient079C  |
| 9407 | Patient022A | Patient201E  |
| 9408 | Patient072  | Patient099D  |
| 9408 | Patient072  | Patient246A  |
| 9408 | Patient072  | Patient247E  |
| 9409 | Patient013  | Patient094B  |
| 9409 | Patient022A | Patient079A1 |
| 9409 | Patient072  | Patient126D  |
| 9410 | Patient022A | Patient201A  |
| 9411 | Patient022A | Patient246B  |
| 9411 | Patient022A | Patient247A  |
| 9412 | Patient013  | Patient094C  |
| 9412 | Patient022A | Patient247C  |
| 9412 | Patient072  | Patient246C  |
| 9413 | Patient022A | Patient247B  |
| 9413 | Patient072  | Patient201A  |
| 9414 | Patient022A | Patient247E  |
| 9414 | Patient072  | Patient201E  |
| 9414 | Patient072  | Patient246B  |
| 9416 | Patient022A | Patient079B  |
| 9416 | Patient072  | Patient131   |
| 9416 | Patient072  | Patient247A  |

|      |             |              |
|------|-------------|--------------|
| 9416 | Patient072  | Patient247B  |
| 9417 | Patient072  | Patient246D  |
| 9417 | Patient072  | Patient247C  |
| 9418 | Patient022A | Patient246E  |
| 9419 | Patient072  | Patient246E  |
| 9420 | Patient022A | Patient023   |
| 9420 | Patient022A | Patient246D  |
| 9421 | Patient022A | Patient128   |
| 9423 | Patient023  | Patient072   |
| 9424 | Patient022A | Patient205   |
| 9438 | Patient072  | Patient205   |
| 9440 | Patient013  | Patient093C  |
| 9444 | Patient013  | Patient158   |
| 9448 | Patient013  | Patient093B  |
| 9455 | Patient013  | Patient028   |
| 9455 | Patient013  | Patient094D  |
| 9457 | Patient013  | Patient094E  |
| 9467 | Patient022A | Patient033   |
| 9468 | Patient007A | Patient194   |
| 9469 | Patient007B | Patient194   |
| 9469 | Patient013  | Patient204   |
| 9469 | Patient013  | Patient210   |
| 9471 | Patient013  | Patient232B  |
| 9476 | Patient013  | Patient108B2 |
| 9477 | Patient013  | Patient232E  |
| 9478 | Patient013  | Patient232A  |
| 9479 | Patient013  | Patient108B1 |
| 9480 | Patient013  | Patient232C  |
| 9480 | Patient013  | Patient232D  |
| 9489 | Patient007A | Patient091A  |
| 9491 | Patient007B | Patient091A  |
| 9491 | Patient013  | Patient126E  |
| 9505 | Patient013  | Patient126D  |
| 9506 | Patient013  | Patient054   |
| 9510 | Patient033  | Patient072   |
| 9513 | Patient013  | Patient131   |
| 9516 | Patient033  | Patient128   |
| 9518 | Patient013  | Patient205   |
| 9533 | Patient013  | Patient023   |
| 9537 | Patient007A | Patient202   |
| 9537 | Patient007B | Patient202   |
| 9539 | Patient013  | Patient033   |
| 9540 | Patient055  | Patient072   |
| 9562 | Patient091A | Patient128   |
| 9585 | Patient013  | Patient157   |
| 9588 | Patient013  | Patient247D  |
| 9596 | Patient013  | Patient246A  |
| 9601 | Patient013  | Patient045D  |
| 9601 | Patient013  | Patient100A  |
| 9603 | Patient022A | Patient091A  |



|      |            |              |
|------|------------|--------------|
| 9603 | Patient128 | Patient194   |
| 9605 | Patient013 | Patient247A  |
| 9605 | Patient013 | Patient247B  |
| 9606 | Patient013 | Patient247C  |
| 9610 | Patient013 | Patient220A  |
| 9613 | Patient013 | Patient247E  |
| 9614 | Patient013 | Patient104A  |
| 9615 | Patient072 | Patient128   |
| 9617 | Patient013 | Patient104B  |
| 9617 | Patient013 | Patient263A  |
| 9618 | Patient013 | Patient213B  |
| 9619 | Patient013 | Patient079A2 |
| 9619 | Patient028 | Patient055   |
| 9620 | Patient013 | Patient196F  |
| 9621 | Patient013 | Patient079C  |
| 9621 | Patient013 | Patient236B  |
| 9623 | Patient013 | Patient222C  |
| 9624 | Patient013 | Patient079A1 |
| 9626 | Patient013 | Patient108A  |
| 9626 | Patient013 | Patient189A  |
| 9627 | Patient013 | Patient109A  |
| 9627 | Patient013 | Patient189E  |
| 9628 | Patient013 | Patient108D  |
| 9629 | Patient013 | Patient109D  |
| 9629 | Patient013 | Patient109E  |
| 9629 | Patient013 | Patient252A  |
| 9630 | Patient013 | Patient108G  |
| 9630 | Patient013 | Patient109C  |
| 9630 | Patient013 | Patient189B  |
| 9630 | Patient013 | Patient252D  |
| 9631 | Patient013 | Patient127A  |
| 9631 | Patient013 | Patient236A  |
| 9632 | Patient013 | Patient079B  |
| 9632 | Patient013 | Patient099E  |
| 9632 | Patient013 | Patient108F  |
| 9632 | Patient013 | Patient222B  |
| 9633 | Patient013 | Patient252B  |
| 9634 | Patient013 | Patient097A  |
| 9635 | Patient013 | Patient097D  |
| 9635 | Patient013 | Patient108H  |
| 9635 | Patient013 | Patient109B  |
| 9635 | Patient013 | Patient127B  |
| 9635 | Patient013 | Patient265   |
| 9636 | Patient013 | Patient159   |
| 9636 | Patient038 | Patient055   |
| 9637 | Patient013 | Patient196E  |
| 9638 | Patient013 | Patient097C  |
| 9638 | Patient013 | Patient222A  |
| 9638 | Patient055 | Patient196F  |
| 9640 | Patient013 | Patient187   |

|      |             |              |
|------|-------------|--------------|
| 9640 | Patient013  | Patient196A  |
| 9640 | Patient013  | Patient252F  |
| 9640 | Patient013  | Patient263B  |
| 9641 | Patient013  | Patient097B  |
| 9641 | Patient013  | Patient196C  |
| 9641 | Patient055  | Patient222C  |
| 9642 | Patient007A | Patient072   |
| 9643 | Patient013  | Patient097E  |
| 9643 | Patient013  | Patient201B  |
| 9643 | Patient013  | Patient218A  |
| 9644 | Patient013  | Patient099B  |
| 9644 | Patient013  | Patient196B  |
| 9644 | Patient013  | Patient222E  |
| 9644 | Patient013  | Patient222F  |
| 9646 | Patient007B | Patient072   |
| 9646 | Patient055  | Patient263A  |
| 9647 | Patient013  | Patient149B  |
| 9647 | Patient013  | Patient218B  |
| 9648 | Patient013  | Patient184   |
| 9648 | Patient013  | Patient222D  |
| 9649 | Patient013  | Patient201A  |
| 9650 | Patient013  | Patient099A  |
| 9650 | Patient013  | Patient201E  |
| 9650 | Patient055  | Patient202   |
| 9650 | Patient091A | Patient202   |
| 9652 | Patient013  | Patient021A2 |
| 9652 | Patient013  | Patient099C  |
| 9652 | Patient013  | Patient246C  |
| 9652 | Patient022A | Patient194   |
| 9654 | Patient013  | Patient021A1 |
| 9655 | Patient013  | Patient099D  |
| 9655 | Patient013  | Patient246B  |
| 9657 | Patient013  | Patient246D  |
| 9657 | Patient022A | Patient075   |
| 9657 | Patient045D | Patient055   |
| 9661 | Patient013  | Patient246E  |
| 9672 | Patient013  | Patient196D  |
| 9674 | Patient055  | Patient066A  |
| 9676 | Patient055  | Patient093A  |
| 9677 | Patient055  | Patient094A  |
| 9680 | Patient075  | Patient202   |
| 9681 | Patient055  | Patient093D  |
| 9681 | Patient055  | Patient094C  |
| 9682 | Patient055  | Patient094B  |
| 9685 | Patient072  | Patient202   |
| 9686 | Patient055  | Patient093E  |
| 9687 | Patient072  | Patient194   |
| 9691 | Patient072  | Patient091A  |
| 9694 | Patient033  | Patient194   |
| 9702 | Patient194  | Patient202   |

|      |             |              |
|------|-------------|--------------|
| 9708 | Patient055  | Patient210   |
| 9710 | Patient054  | Patient055   |
| 9713 | Patient033  | Patient091A  |
| 9717 | Patient055  | Patient093B  |
| 9718 | Patient007A | Patient013   |
| 9721 | Patient055  | Patient158   |
| 9722 | Patient007B | Patient013   |
| 9722 | Patient055  | Patient093C  |
| 9726 | Patient055  | Patient094D  |
| 9728 | Patient055  | Patient247D  |
| 9731 | Patient055  | Patient094E  |
| 9733 | Patient055  | Patient100A  |
| 9734 | Patient128  | Patient202   |
| 9735 | Patient055  | Patient157   |
| 9738 | Patient055  | Patient213B  |
| 9738 | Patient055  | Patient246A  |
| 9748 | Patient055  | Patient247A  |
| 9748 | Patient055  | Patient247C  |
| 9749 | Patient055  | Patient104B  |
| 9749 | Patient055  | Patient247B  |
| 9751 | Patient055  | Patient104A  |
| 9758 | Patient055  | Patient236B  |
| 9760 | Patient045D | Patient075   |
| 9760 | Patient055  | Patient189A  |
| 9760 | Patient055  | Patient247E  |
| 9761 | Patient055  | Patient204   |
| 9762 | Patient055  | Patient189B  |
| 9763 | Patient038  | Patient075   |
| 9763 | Patient055  | Patient108B2 |
| 9763 | Patient055  | Patient189E  |
| 9766 | Patient055  | Patient126E  |
| 9767 | Patient055  | Patient097A  |
| 9767 | Patient055  | Patient097E  |
| 9767 | Patient055  | Patient236A  |
| 9768 | Patient007A | Patient033   |
| 9768 | Patient066A | Patient075   |
| 9769 | Patient055  | Patient108B1 |
| 9769 | Patient055  | Patient196A  |
| 9769 | Patient055  | Patient222B  |
| 9771 | Patient055  | Patient099E  |
| 9771 | Patient055  | Patient265   |
| 9772 | Patient007B | Patient033   |
| 9772 | Patient055  | Patient097D  |
| 9774 | Patient055  | Patient220A  |
| 9774 | Patient055  | Patient222D  |
| 9775 | Patient055  | Patient097C  |
| 9775 | Patient055  | Patient127A  |
| 9775 | Patient055  | Patient196B  |
| 9775 | Patient055  | Patient252D  |
| 9776 | Patient055  | Patient097B  |

|      |              |             |
|------|--------------|-------------|
| 9776 | Patient055   | Patient196C |
| 9776 | Patient055   | Patient222A |
| 9776 | Patient055   | Patient222F |
| 9777 | Patient055   | Patient222E |
| 9778 | Patient055   | Patient232B |
| 9779 | Patient055   | Patient196D |
| 9780 | Patient055   | Patient127B |
| 9780 | Patient055   | Patient196E |
| 9781 | Patient055   | Patient126D |
| 9781 | Patient055   | Patient232D |
| 9782 | Patient055   | Patient232E |
| 9782 | Patient055   | Patient246C |
| 9783 | Patient055   | Patient201B |
| 9784 | Patient022A  | Patient031  |
| 9784 | Patient055   | Patient263B |
| 9786 | Patient021A1 | Patient055  |
| 9786 | Patient055   | Patient099A |
| 9786 | Patient055   | Patient187  |
| 9786 | Patient055   | Patient205  |
| 9786 | Patient055   | Patient232A |
| 9787 | Patient055   | Patient099B |
| 9787 | Patient055   | Patient108A |
| 9787 | Patient055   | Patient232C |
| 9788 | Patient021A2 | Patient055  |
| 9788 | Patient055   | Patient099C |
| 9788 | Patient055   | Patient099D |
| 9788 | Patient055   | Patient149B |
| 9788 | Patient055   | Patient159  |
| 9788 | Patient055   | Patient252A |
| 9789 | Patient055   | Patient108D |
| 9789 | Patient055   | Patient184  |
| 9790 | Patient055   | Patient109C |
| 9790 | Patient055   | Patient201E |
| 9791 | Patient055   | Patient108H |
| 9792 | Patient055   | Patient218A |
| 9792 | Patient055   | Patient246B |
| 9792 | Patient055   | Patient252B |
| 9793 | Patient055   | Patient108G |
| 9793 | Patient055   | Patient109A |
| 9793 | Patient055   | Patient252F |
| 9794 | Patient013   | Patient055  |
| 9794 | Patient055   | Patient109B |
| 9794 | Patient055   | Patient201A |
| 9794 | Patient075   | Patient204  |
| 9796 | Patient007A  | Patient075  |
| 9797 | Patient075   | Patient263A |
| 9798 | Patient055   | Patient109D |
| 9798 | Patient055   | Patient109E |
| 9798 | Patient055   | Patient218B |
| 9799 | Patient055   | Patient131  |

|      |             |              |
|------|-------------|--------------|
| 9799 | Patient055  | Patient246D  |
| 9799 | Patient055  | Patient246E  |
| 9799 | Patient075  | Patient222C  |
| 9800 | Patient007B | Patient075   |
| 9800 | Patient054  | Patient075   |
| 9800 | Patient055  | Patient079C  |
| 9801 | Patient055  | Patient108F  |
| 9801 | Patient075  | Patient196F  |
| 9802 | Patient055  | Patient079A2 |
| 9803 | Patient055  | Patient079A1 |
| 9806 | Patient007A | Patient022A  |
| 9808 | Patient013  | Patient091A  |
| 9809 | Patient007B | Patient022A  |
| 9809 | Patient055  | Patient079B  |
| 9809 | Patient075  | Patient128   |
| 9810 | Patient075  | Patient093D  |
| 9811 | Patient075  | Patient158   |
| 9813 | Patient075  | Patient094A  |
| 9818 | Patient031  | Patient033   |
| 9818 | Patient075  | Patient093A  |
| 9820 | Patient075  | Patient093E  |
| 9821 | Patient075  | Patient094C  |
| 9822 | Patient075  | Patient094B  |
| 9823 | Patient023  | Patient055   |
| 9823 | Patient028  | Patient075   |
| 9823 | Patient033  | Patient055   |
| 9830 | Patient013  | Patient128   |
| 9833 | Patient007A | Patient128   |
| 9833 | Patient033  | Patient075   |
| 9833 | Patient075  | Patient205   |
| 9840 | Patient055  | Patient128   |
| 9841 | Patient007B | Patient128   |
| 9842 | Patient013  | Patient194   |
| 9844 | Patient075  | Patient247D  |
| 9848 | Patient075  | Patient157   |
| 9855 | Patient075  | Patient093C  |
| 9857 | Patient075  | Patient210   |
| 9857 | Patient075  | Patient246A  |
| 9860 | Patient075  | Patient247A  |
| 9861 | Patient075  | Patient247B  |
| 9862 | Patient075  | Patient194   |
| 9863 | Patient075  | Patient093B  |
| 9863 | Patient075  | Patient247C  |
| 9864 | Patient033  | Patient202   |
| 9866 | Patient075  | Patient104B  |
| 9866 | Patient075  | Patient189B  |
| 9867 | Patient075  | Patient104A  |
| 9870 | Patient033  | Patient066A  |
| 9870 | Patient075  | Patient100A  |
| 9870 | Patient075  | Patient189A  |

|      |              |              |
|------|--------------|--------------|
| 9872 | Patient075   | Patient213B  |
| 9874 | Patient075   | Patient094D  |
| 9874 | Patient075   | Patient189E  |
| 9875 | Patient075   | Patient094E  |
| 9876 | Patient021A2 | Patient075   |
| 9876 | Patient075   | Patient247E  |
| 9877 | Patient021A1 | Patient075   |
| 9884 | Patient075   | Patient108A  |
| 9884 | Patient075   | Patient108B2 |
| 9885 | Patient075   | Patient099E  |
| 9886 | Patient075   | Patient159   |
| 9886 | Patient075   | Patient252D  |
| 9887 | Patient075   | Patient109C  |
| 9887 | Patient075   | Patient109E  |
| 9888 | Patient075   | Patient108B1 |
| 9890 | Patient075   | Patient097A  |
| 9890 | Patient075   | Patient109D  |
| 9891 | Patient075   | Patient079C  |
| 9891 | Patient075   | Patient222B  |
| 9892 | Patient075   | Patient097C  |
| 9892 | Patient075   | Patient108G  |
| 9892 | Patient075   | Patient108H  |
| 9893 | Patient075   | Patient097D  |
| 9893 | Patient075   | Patient108D  |
| 9895 | Patient075   | Patient097E  |
| 9895 | Patient075   | Patient109A  |
| 9895 | Patient075   | Patient236B  |
| 9896 | Patient075   | Patient079A1 |
| 9896 | Patient075   | Patient079A2 |
| 9898 | Patient075   | Patient079B  |
| 9898 | Patient075   | Patient097B  |
| 9898 | Patient075   | Patient131   |
| 9898 | Patient075   | Patient252A  |
| 9899 | Patient075   | Patient108F  |
| 9899 | Patient075   | Patient109B  |
| 9899 | Patient075   | Patient220A  |
| 9899 | Patient075   | Patient265   |
| 9900 | Patient075   | Patient127A  |
| 9900 | Patient075   | Patient252F  |
| 9901 | Patient075   | Patient184   |
| 9901 | Patient075   | Patient218A  |
| 9901 | Patient075   | Patient236A  |
| 9901 | Patient075   | Patient252B  |
| 9902 | Patient075   | Patient196A  |
| 9902 | Patient075   | Patient222A  |
| 9903 | Patient075   | Patient099B  |
| 9904 | Patient075   | Patient187   |
| 9904 | Patient075   | Patient218B  |
| 9904 | Patient075   | Patient263B  |
| 9905 | Patient075   | Patient091A  |

|       |             |             |
|-------|-------------|-------------|
| 9905  | Patient075  | Patient196B |
| 9906  | Patient075  | Patient099A |
| 9907  | Patient075  | Patient099C |
| 9907  | Patient075  | Patient127B |
| 9907  | Patient075  | Patient196E |
| 9908  | Patient075  | Patient126E |
| 9908  | Patient075  | Patient222D |
| 9909  | Patient075  | Patient196C |
| 9909  | Patient075  | Patient222E |
| 9910  | Patient023  | Patient075  |
| 9910  | Patient075  | Patient201B |
| 9911  | Patient075  | Patient099D |
| 9912  | Patient075  | Patient222F |
| 9917  | Patient075  | Patient201E |
| 9918  | Patient075  | Patient126D |
| 9918  | Patient075  | Patient149B |
| 9918  | Patient075  | Patient201A |
| 9918  | Patient075  | Patient246C |
| 9920  | Patient075  | Patient246B |
| 9923  | Patient075  | Patient246E |
| 9928  | Patient075  | Patient246D |
| 9930  | Patient075  | Patient232D |
| 9931  | Patient075  | Patient232B |
| 9935  | Patient075  | Patient232A |
| 9935  | Patient075  | Patient232C |
| 9935  | Patient075  | Patient232E |
| 9936  | Patient075  | Patient196D |
| 9941  | Patient028  | Patient033  |
| 9963  | Patient033  | Patient196F |
| 9963  | Patient033  | Patient263A |
| 9966  | Patient033  | Patient222C |
| 9977  | Patient031  | Patient072  |
| 9997  | Patient055  | Patient091A |
| 10001 | Patient128  | Patient158  |
| 10003 | Patient013  | Patient202  |
| 10018 | Patient066A | Patient128  |
| 10025 | Patient128  | Patient210  |
| 10028 | Patient033  | Patient038  |
| 10031 | Patient055  | Patient194  |
| 10032 | Patient033  | Patient054  |
| 10032 | Patient033  | Patient204  |
| 10036 | Patient056  | Patient254  |
| 10040 | Patient022A | Patient032D |
| 10041 | Patient094A | Patient128  |
| 10044 | Patient033  | Patient093C |
| 10048 | Patient093A | Patient128  |
| 10049 | Patient005  | Patient254  |
| 10049 | Patient033  | Patient158  |
| 10051 | Patient093D | Patient128  |
| 10053 | Patient093E | Patient128  |

|       |             |              |
|-------|-------------|--------------|
| 10054 | Patient094C | Patient128   |
| 10055 | Patient033  | Patient045D  |
| 10056 | Patient045D | Patient091A  |
| 10057 | Patient094B | Patient128   |
| 10058 | Patient022A | Patient207   |
| 10058 | Patient031  | Patient202   |
| 10058 | Patient091A | Patient222C  |
| 10059 | Patient028  | Patient091A  |
| 10059 | Patient091A | Patient196F  |
| 10060 | Patient128  | Patient246A  |
| 10061 | Patient022A | Patient053A1 |
| 10061 | Patient022A | Patient251   |
| 10061 | Patient033  | Patient093B  |
| 10061 | Patient033  | Patient094A  |
| 10061 | Patient045D | Patient194   |
| 10062 | Patient038  | Patient128   |
| 10063 | Patient128  | Patient247D  |
| 10064 | Patient022A | Patient206   |
| 10065 | Patient033  | Patient094D  |
| 10067 | Patient033  | Patient094E  |
| 10067 | Patient091A | Patient263A  |
| 10069 | Patient028  | Patient194   |
| 10069 | Patient033  | Patient093A  |
| 10069 | Patient128  | Patient247C  |
| 10070 | Patient033  | Patient093D  |
| 10070 | Patient033  | Patient213B  |
| 10071 | Patient128  | Patient247A  |
| 10071 | Patient128  | Patient247B  |
| 10072 | Patient033  | Patient093E  |
| 10072 | Patient194  | Patient196F  |
| 10074 | Patient022A | Patient241   |
| 10074 | Patient033  | Patient094C  |
| 10075 | Patient033  | Patient094B  |
| 10076 | Patient194  | Patient222C  |
| 10077 | Patient013  | Patient031   |
| 10077 | Patient033  | Patient205   |
| 10077 | Patient194  | Patient263A  |
| 10084 | Patient128  | Patient157   |
| 10085 | Patient033  | Patient104B  |
| 10086 | Patient033  | Patient104A  |
| 10086 | Patient033  | Patient210   |
| 10086 | Patient055  | Patient075   |
| 10090 | Patient128  | Patient247E  |
| 10091 | Patient033  | Patient126E  |
| 10091 | Patient128  | Patient204   |
| 10093 | Patient033  | Patient099E  |
| 10093 | Patient091B | Patient254   |
| 10098 | Patient093C | Patient128   |
| 10099 | Patient033  | Patient100A  |
| 10101 | Patient033  | Patient189A  |



|       |             |              |
|-------|-------------|--------------|
| 10101 | Patient033  | Patient222B  |
| 10101 | Patient202  | Patient251   |
| 10103 | Patient033  | Patient189B  |
| 10104 | Patient022A | Patient242   |
| 10104 | Patient033  | Patient252D  |
| 10105 | Patient033  | Patient159   |
| 10105 | Patient033  | Patient189E  |
| 10105 | Patient033  | Patient220A  |
| 10106 | Patient128  | Patient252A  |
| 10107 | Patient033  | Patient236B  |
| 10108 | Patient022A | Patient258B  |
| 10108 | Patient100A | Patient128   |
| 10108 | Patient128  | Patient131   |
| 10109 | Patient022A | Patient258D  |
| 10109 | Patient033  | Patient196A  |
| 10110 | Patient022A | Patient258A1 |
| 10110 | Patient022A | Patient258G  |
| 10111 | Patient022A | Patient258F  |
| 10111 | Patient033  | Patient232B  |
| 10111 | Patient093B | Patient128   |
| 10112 | Patient022A | Patient258A2 |
| 10112 | Patient033  | Patient099A  |
| 10112 | Patient033  | Patient196B  |
| 10112 | Patient033  | Patient196C  |
| 10112 | Patient056  | Patient191   |
| 10113 | Patient007A | Patient066A  |
| 10113 | Patient033  | Patient232C  |
| 10113 | Patient033  | Patient232D  |
| 10113 | Patient033  | Patient247D  |
| 10113 | Patient128  | Patient252B  |
| 10114 | Patient028  | Patient202   |
| 10114 | Patient033  | Patient099B  |
| 10114 | Patient033  | Patient187   |
| 10114 | Patient033  | Patient196E  |
| 10114 | Patient033  | Patient232E  |
| 10114 | Patient033  | Patient236A  |
| 10114 | Patient033  | Patient265   |
| 10115 | Patient033  | Patient232A  |
| 10116 | Patient007A | Patient028   |
| 10116 | Patient033  | Patient222E  |
| 10116 | Patient104B | Patient128   |
| 10117 | Patient033  | Patient099C  |
| 10117 | Patient033  | Patient222F  |
| 10118 | Patient033  | Patient222A  |
| 10118 | Patient033  | Patient222D  |
| 10118 | Patient033  | Patient263B  |
| 10118 | Patient054  | Patient128   |
| 10118 | Patient104A | Patient128   |
| 10119 | Patient033  | Patient127A  |
| 10119 | Patient094D | Patient128   |

|       |             |             |
|-------|-------------|-------------|
| 10121 | Patient007B | Patient066A |
| 10121 | Patient022A | Patient086C |
| 10121 | Patient128  | Patient252F |
| 10122 | Patient033  | Patient201B |
| 10122 | Patient033  | Patient201E |
| 10123 | Patient007B | Patient028  |
| 10123 | Patient033  | Patient099D |
| 10123 | Patient033  | Patient201A |
| 10123 | Patient194  | Patient210  |
| 10124 | Patient022A | Patient086E |
| 10124 | Patient022A | Patient090  |
| 10124 | Patient033  | Patient196D |
| 10125 | Patient022A | Patient086A |
| 10125 | Patient033  | Patient127B |
| 10125 | Patient094E | Patient128  |
| 10126 | Patient033  | Patient218A |
| 10126 | Patient128  | Patient213B |
| 10127 | Patient022A | Patient086B |
| 10127 | Patient022A | Patient133  |
| 10127 | Patient033  | Patient247E |
| 10128 | Patient007A | Patient038  |
| 10129 | Patient201C | Patient254  |
| 10129 | Patient201D | Patient254  |
| 10130 | Patient007A | Patient222C |
| 10130 | Patient033  | Patient149B |
| 10130 | Patient033  | Patient157  |
| 10130 | Patient033  | Patient184  |
| 10131 | Patient022A | Patient176  |
| 10131 | Patient033  | Patient218B |
| 10133 | Patient097E | Patient128  |
| 10134 | Patient007B | Patient038  |
| 10134 | Patient097A | Patient128  |
| 10135 | Patient007A | Patient196F |
| 10135 | Patient033  | Patient247B |
| 10136 | Patient022A | Patient258E |
| 10136 | Patient033  | Patient247A |
| 10137 | Patient005  | Patient191  |
| 10137 | Patient033  | Patient247C |
| 10138 | Patient007B | Patient222C |
| 10138 | Patient066A | Patient091A |
| 10138 | Patient097D | Patient128  |
| 10140 | Patient007A | Patient263A |
| 10140 | Patient097C | Patient128  |
| 10140 | Patient128  | Patient159  |
| 10140 | Patient128  | Patient196D |
| 10140 | Patient128  | Patient222A |
| 10140 | Patient128  | Patient236B |
| 10141 | Patient066B | Patient254  |
| 10141 | Patient128  | Patient222C |
| 10142 | Patient128  | Patient222F |

|       |              |             |
|-------|--------------|-------------|
| 10143 | Patient007B  | Patient196F |
| 10143 | Patient022A  | Patient164  |
| 10143 | Patient045D  | Patient128  |
| 10143 | Patient128   | Patient205  |
| 10143 | Patient128   | Patient222B |
| 10144 | Patient079C  | Patient128  |
| 10144 | Patient128   | Patient222E |
| 10145 | Patient108B2 | Patient128  |
| 10145 | Patient191   | Patient201C |
| 10146 | Patient128   | Patient252D |
| 10147 | Patient007A  | Patient054  |
| 10147 | Patient007B  | Patient263A |
| 10147 | Patient128   | Patient220A |
| 10147 | Patient191   | Patient201D |
| 10148 | Patient079A1 | Patient128  |
| 10148 | Patient079A2 | Patient128  |
| 10148 | Patient126E  | Patient128  |
| 10148 | Patient128   | Patient265  |
| 10149 | Patient022A  | Patient141G |
| 10149 | Patient097B  | Patient128  |
| 10149 | Patient108A  | Patient128  |
| 10149 | Patient108D  | Patient128  |
| 10149 | Patient128   | Patient189B |
| 10149 | Patient128   | Patient246C |
| 10150 | Patient108B1 | Patient128  |
| 10150 | Patient128   | Patient236A |
| 10151 | Patient099E  | Patient128  |
| 10152 | Patient007A  | Patient094A |
| 10152 | Patient091A  | Patient094A |
| 10152 | Patient109B  | Patient128  |
| 10152 | Patient109C  | Patient128  |
| 10152 | Patient109E  | Patient128  |
| 10152 | Patient126D  | Patient128  |
| 10152 | Patient128   | Patient246B |
| 10153 | Patient007A  | Patient093D |
| 10153 | Patient007B  | Patient054  |
| 10153 | Patient022A  | Patient081C |
| 10153 | Patient091A  | Patient093D |
| 10153 | Patient127A  | Patient128  |
| 10153 | Patient128   | Patient246D |
| 10153 | Patient158   | Patient194  |
| 10154 | Patient007A  | Patient204  |
| 10154 | Patient128   | Patient189A |
| 10154 | Patient128   | Patient201B |
| 10154 | Patient128   | Patient246E |
| 10155 | Patient022A  | Patient230G |
| 10155 | Patient079B  | Patient128  |
| 10155 | Patient108G  | Patient128  |
| 10155 | Patient109A  | Patient128  |
| 10155 | Patient109D  | Patient128  |

|       |             |             |
|-------|-------------|-------------|
| 10155 | Patient128  | Patient189E |
| 10155 | Patient128  | Patient196A |
| 10155 | Patient128  | Patient222D |
| 10157 | Patient022A | Patient081D |
| 10157 | Patient108F | Patient128  |
| 10157 | Patient108H | Patient128  |
| 10158 | Patient007B | Patient094A |
| 10158 | Patient022A | Patient032E |
| 10158 | Patient022A | Patient230C |
| 10158 | Patient031  | Patient038  |
| 10158 | Patient128  | Patient187  |
| 10158 | Patient189B | Patient194  |
| 10159 | Patient007A | Patient093A |
| 10159 | Patient007B | Patient093D |
| 10159 | Patient128  | Patient196C |
| 10159 | Patient128  | Patient201E |
| 10159 | Patient128  | Patient218A |
| 10160 | Patient007B | Patient204  |
| 10160 | Patient127B | Patient128  |
| 10160 | Patient128  | Patient196E |
| 10161 | Patient007A | Patient093E |
| 10161 | Patient022A | Patient022B |
| 10161 | Patient022A | Patient167  |
| 10161 | Patient100A | Patient194  |
| 10161 | Patient128  | Patient263A |
| 10162 | Patient022A | Patient032C |
| 10162 | Patient022A | Patient141F |
| 10162 | Patient022A | Patient217A |
| 10162 | Patient128  | Patient184  |
| 10162 | Patient128  | Patient201A |
| 10162 | Patient128  | Patient263B |
| 10163 | Patient007A | Patient094B |
| 10163 | Patient022A | Patient145B |
| 10163 | Patient022A | Patient217C |
| 10163 | Patient022A | Patient217I |
| 10163 | Patient023  | Patient128  |
| 10163 | Patient091A | Patient093A |
| 10163 | Patient091A | Patient094B |
| 10164 | Patient022A | Patient217D |
| 10164 | Patient022A | Patient217H |
| 10164 | Patient128  | Patient149B |
| 10164 | Patient128  | Patient196F |
| 10164 | Patient128  | Patient218B |
| 10164 | Patient133  | Patient202  |
| 10164 | Patient189A | Patient194  |
| 10164 | Patient189E | Patient194  |
| 10165 | Patient007B | Patient093A |
| 10165 | Patient022A | Patient217B |
| 10165 | Patient022A | Patient217E |
| 10165 | Patient022A | Patient217F |

|       |             |              |
|-------|-------------|--------------|
| 10165 | Patient091A | Patient093E  |
| 10165 | Patient128  | Patient196B  |
| 10166 | Patient022A | Patient261G  |
| 10166 | Patient031  | Patient093D  |
| 10167 | Patient007A | Patient094C  |
| 10167 | Patient007B | Patient093E  |
| 10168 | Patient091B | Patient191   |
| 10169 | Patient007B | Patient094B  |
| 10169 | Patient022A | Patient261E  |
| 10169 | Patient031  | Patient094A  |
| 10169 | Patient093D | Patient194   |
| 10169 | Patient099B | Patient128   |
| 10170 | Patient031  | Patient093A  |
| 10170 | Patient031  | Patient093E  |
| 10170 | Patient031  | Patient094B  |
| 10170 | Patient031  | Patient158   |
| 10171 | Patient022A | Patient217J  |
| 10171 | Patient033  | Patient108B2 |
| 10171 | Patient094A | Patient194   |
| 10172 | Patient091A | Patient094C  |
| 10173 | Patient007B | Patient094C  |
| 10173 | Patient022A | Patient192D  |
| 10173 | Patient099C | Patient128   |
| 10173 | Patient099D | Patient128   |
| 10174 | Patient022A | Patient261A  |
| 10174 | Patient031  | Patient094C  |
| 10174 | Patient031  | Patient194   |
| 10174 | Patient099A | Patient128   |
| 10175 | Patient022A | Patient121B  |
| 10175 | Patient022A | Patient261B  |
| 10175 | Patient033  | Patient108B1 |
| 10175 | Patient066A | Patient194   |
| 10176 | Patient022A | Patient261C  |
| 10176 | Patient028  | Patient128   |
| 10176 | Patient031  | Patient091A  |
| 10177 | Patient022A | Patient026D  |
| 10177 | Patient022A | Patient081B  |
| 10177 | Patient202  | Patient258D  |
| 10177 | Patient202  | Patient258G  |
| 10178 | Patient022A | Patient026C  |
| 10178 | Patient202  | Patient258A1 |
| 10178 | Patient202  | Patient258B  |
| 10179 | Patient033  | Patient126D  |
| 10179 | Patient091A | Patient100A  |
| 10179 | Patient202  | Patient258A2 |
| 10179 | Patient202  | Patient258F  |
| 10180 | Patient032E | Patient202   |
| 10181 | Patient022A | Patient081F  |
| 10181 | Patient022A | Patient230D  |
| 10181 | Patient032C | Patient202   |

|       |             |              |
|-------|-------------|--------------|
| 10181 | Patient093A | Patient194   |
| 10181 | Patient145B | Patient202   |
| 10182 | Patient022A | Patient081A2 |
| 10182 | Patient091A | Patient093C  |
| 10183 | Patient022A | Patient026E  |
| 10183 | Patient022A | Patient081E  |
| 10183 | Patient022A | Patient121A  |
| 10183 | Patient022A | Patient261D  |
| 10184 | Patient033  | Patient108G  |
| 10184 | Patient093E | Patient194   |
| 10184 | Patient094B | Patient194   |
| 10185 | Patient031  | Patient055   |
| 10185 | Patient031  | Patient128   |
| 10185 | Patient033  | Patient108A  |
| 10185 | Patient128  | Patient232B  |
| 10185 | Patient167  | Patient202   |
| 10186 | Patient022A | Patient081A1 |
| 10187 | Patient094C | Patient194   |
| 10188 | Patient128  | Patient232C  |
| 10189 | Patient022A | Patient161B  |
| 10189 | Patient033  | Patient108D  |
| 10189 | Patient033  | Patient108F  |
| 10189 | Patient033  | Patient109A  |
| 10189 | Patient033  | Patient109C  |
| 10190 | Patient033  | Patient108H  |
| 10190 | Patient128  | Patient232A  |
| 10190 | Patient128  | Patient232D  |
| 10190 | Patient128  | Patient232E  |
| 10191 | Patient022A | Patient230E  |
| 10192 | Patient033  | Patient109B  |
| 10192 | Patient176  | Patient202   |
| 10192 | Patient202  | Patient230C  |
| 10192 | Patient202  | Patient261E  |
| 10193 | Patient091A | Patient247D  |
| 10194 | Patient007A | Patient205   |
| 10194 | Patient022A | Patient230F  |
| 10194 | Patient033  | Patient097A  |
| 10194 | Patient091A | Patient158   |
| 10194 | Patient141G | Patient202   |
| 10194 | Patient202  | Patient230G  |
| 10195 | Patient022A | Patient145C  |
| 10195 | Patient033  | Patient097D  |
| 10195 | Patient033  | Patient109E  |
| 10195 | Patient093C | Patient194   |
| 10195 | Patient141F | Patient202   |
| 10196 | Patient022A | Patient181A  |
| 10196 | Patient022A | Patient181B  |
| 10196 | Patient033  | Patient131   |
| 10197 | Patient007A | Patient158   |
| 10197 | Patient033  | Patient109D  |

|       |              |              |
|-------|--------------|--------------|
| 10197 | Patient091A  | Patient093B  |
| 10198 | Patient007A  | Patient031   |
| 10199 | Patient022A  | Patient053B  |
| 10199 | Patient022A  | Patient053C  |
| 10199 | Patient022A  | Patient235A  |
| 10199 | Patient031   | Patient054   |
| 10199 | Patient090   | Patient202   |
| 10199 | Patient202   | Patient261C  |
| 10200 | Patient007B  | Patient205   |
| 10200 | Patient028   | Patient031   |
| 10200 | Patient033   | Patient252A  |
| 10200 | Patient091A  | Patient094E  |
| 10201 | Patient007A  | Patient093C  |
| 10201 | Patient007A  | Patient157   |
| 10201 | Patient022A  | Patient150A  |
| 10201 | Patient022A  | Patient173B  |
| 10201 | Patient091A  | Patient213B  |
| 10201 | Patient194   | Patient213B  |
| 10202 | Patient022A  | Patient053A2 |
| 10202 | Patient022A  | Patient173A  |
| 10202 | Patient194   | Patient247D  |
| 10203 | Patient007B  | Patient158   |
| 10203 | Patient021A2 | Patient128   |
| 10203 | Patient033   | Patient097B  |
| 10203 | Patient091A  | Patient094D  |
| 10204 | Patient007A  | Patient247D  |
| 10204 | Patient007B  | Patient031   |
| 10204 | Patient022A  | Patient032A  |
| 10204 | Patient022A  | Patient066D  |
| 10204 | Patient022A  | Patient150B  |
| 10204 | Patient033   | Patient097C  |
| 10204 | Patient033   | Patient252B  |
| 10205 | Patient007A  | Patient093B  |
| 10205 | Patient022A  | Patient066E  |
| 10205 | Patient031   | Patient066A  |
| 10205 | Patient033   | Patient079C  |
| 10205 | Patient033   | Patient097E  |
| 10206 | Patient022A  | Patient066F  |
| 10206 | Patient022A  | Patient150C  |
| 10206 | Patient032D  | Patient202   |
| 10206 | Patient033   | Patient252F  |
| 10206 | Patient091A  | Patient246A  |
| 10206 | Patient202   | Patient261G  |
| 10207 | Patient007B  | Patient093C  |
| 10207 | Patient007B  | Patient157   |
| 10207 | Patient022A  | Patient032B  |
| 10207 | Patient022A  | Patient141D  |
| 10207 | Patient091A  | Patient189B  |
| 10207 | Patient157   | Patient194   |
| 10208 | Patient022A  | Patient141C  |

|       |              |              |
|-------|--------------|--------------|
| 10208 | Patient022A  | Patient145A  |
| 10208 | Patient031   | Patient093C  |
| 10209 | Patient007B  | Patient247D  |
| 10209 | Patient021A1 | Patient128   |
| 10209 | Patient022A  | Patient141B  |
| 10209 | Patient033   | Patient079A1 |
| 10209 | Patient091A  | Patient104A  |
| 10209 | Patient091A  | Patient189E  |
| 10210 | Patient007A  | Patient094D  |
| 10210 | Patient022A  | Patient034A  |
| 10210 | Patient022A  | Patient092C  |
| 10210 | Patient022A  | Patient141A  |
| 10210 | Patient033   | Patient079A2 |
| 10211 | Patient007B  | Patient093B  |
| 10211 | Patient022A  | Patient177   |
| 10211 | Patient053A1 | Patient202   |
| 10211 | Patient091A  | Patient222B  |
| 10212 | Patient021A2 | Patient194   |
| 10212 | Patient022A  | Patient034D  |
| 10212 | Patient022A  | Patient034E  |
| 10212 | Patient091A  | Patient104B  |
| 10212 | Patient091A  | Patient189A  |
| 10212 | Patient093B  | Patient194   |
| 10213 | Patient007A  | Patient094E  |
| 10214 | Patient021A1 | Patient194   |
| 10214 | Patient022A  | Patient230A  |
| 10214 | Patient091A  | Patient157   |
| 10214 | Patient202   | Patient210   |
| 10215 | Patient022A  | Patient213A  |
| 10215 | Patient031   | Patient093B  |
| 10215 | Patient031   | Patient222C  |
| 10215 | Patient038   | Patient194   |
| 10215 | Patient094E  | Patient194   |
| 10215 | Patient104A  | Patient194   |
| 10215 | Patient159   | Patient194   |
| 10216 | Patient007B  | Patient094D  |
| 10216 | Patient022A  | Patient034B  |
| 10217 | Patient031   | Patient263A  |
| 10217 | Patient091A  | Patient204   |
| 10217 | Patient091A  | Patient247A  |
| 10217 | Patient094D  | Patient194   |
| 10217 | Patient099E  | Patient194   |
| 10217 | Patient108A  | Patient194   |
| 10217 | Patient108B1 | Patient194   |
| 10218 | Patient022A  | Patient230B  |
| 10218 | Patient033   | Patient079B  |
| 10218 | Patient091A  | Patient247C  |
| 10218 | Patient194   | Patient246A  |
| 10219 | Patient007B  | Patient094E  |
| 10219 | Patient022A  | Patient034C  |



|       |              |              |
|-------|--------------|--------------|
| 10219 | Patient038   | Patient202   |
| 10219 | Patient079C  | Patient194   |
| 10219 | Patient091A  | Patient099E  |
| 10219 | Patient091A  | Patient247B  |
| 10219 | Patient091A  | Patient247E  |
| 10220 | Patient007A  | Patient210   |
| 10220 | Patient079B  | Patient194   |
| 10220 | Patient104B  | Patient194   |
| 10220 | Patient194   | Patient196A  |
| 10221 | Patient031   | Patient094D  |
| 10221 | Patient031   | Patient247D  |
| 10221 | Patient091A  | Patient196A  |
| 10221 | Patient108B2 | Patient194   |
| 10222 | Patient007A  | Patient246A  |
| 10222 | Patient031   | Patient157   |
| 10222 | Patient031   | Patient196F  |
| 10222 | Patient031   | Patient210   |
| 10222 | Patient194   | Patient247E  |
| 10223 | Patient007A  | Patient189A  |
| 10223 | Patient007A  | Patient213B  |
| 10223 | Patient007A  | Patient247A  |
| 10223 | Patient079A1 | Patient194   |
| 10223 | Patient079A2 | Patient194   |
| 10224 | Patient031   | Patient100A  |
| 10224 | Patient109C  | Patient194   |
| 10225 | Patient023   | Patient033   |
| 10225 | Patient031   | Patient094E  |
| 10225 | Patient091A  | Patient108A  |
| 10225 | Patient091A  | Patient108B1 |
| 10225 | Patient109E  | Patient194   |
| 10226 | Patient007A  | Patient247B  |
| 10226 | Patient007A  | Patient247C  |
| 10226 | Patient091A  | Patient220A  |
| 10226 | Patient091A  | Patient252A  |
| 10226 | Patient091A  | Patient252D  |
| 10226 | Patient109B  | Patient194   |
| 10226 | Patient158   | Patient202   |
| 10227 | Patient007A  | Patient189E  |
| 10227 | Patient007B  | Patient210   |
| 10227 | Patient022A  | Patient183D  |
| 10227 | Patient031   | Patient246A  |
| 10227 | Patient091A  | Patient196E  |
| 10227 | Patient097D  | Patient194   |
| 10227 | Patient097E  | Patient194   |
| 10227 | Patient108D  | Patient194   |
| 10227 | Patient194   | Patient196E  |
| 10227 | Patient194   | Patient252A  |
| 10228 | Patient007A  | Patient189B  |
| 10228 | Patient007B  | Patient246A  |
| 10228 | Patient022A  | Patient045A  |

|       |              |              |
|-------|--------------|--------------|
| 10228 | Patient091A  | Patient108B2 |
| 10228 | Patient194   | Patient220A  |
| 10228 | Patient194   | Patient247C  |
| 10228 | Patient194   | Patient252D  |
| 10228 | Patient194   | Patient252F  |
| 10229 | Patient007B  | Patient189A  |
| 10229 | Patient007B  | Patient213B  |
| 10229 | Patient007B  | Patient247A  |
| 10229 | Patient022A  | Patient092D  |
| 10229 | Patient022A  | Patient123A  |
| 10229 | Patient022A  | Patient224A  |
| 10229 | Patient079B  | Patient091A  |
| 10229 | Patient079C  | Patient091A  |
| 10229 | Patient091A  | Patient097D  |
| 10229 | Patient091A  | Patient222A  |
| 10229 | Patient109A  | Patient194   |
| 10229 | Patient109D  | Patient194   |
| 10229 | Patient126D  | Patient194   |
| 10229 | Patient194   | Patient222B  |
| 10229 | Patient194   | Patient236B  |
| 10229 | Patient194   | Patient247A  |
| 10229 | Patient194   | Patient247B  |
| 10230 | Patient007A  | Patient247E  |
| 10230 | Patient022A  | Patient045B  |
| 10230 | Patient022A  | Patient183B  |
| 10230 | Patient091A  | Patient109E  |
| 10230 | Patient097A  | Patient194   |
| 10230 | Patient108G  | Patient194   |
| 10231 | Patient022A  | Patient123C  |
| 10231 | Patient022A  | Patient183C  |
| 10231 | Patient022A  | Patient224B  |
| 10231 | Patient091A  | Patient097E  |
| 10231 | Patient091A  | Patient109C  |
| 10231 | Patient091A  | Patient196B  |
| 10231 | Patient091A  | Patient236B  |
| 10231 | Patient091A  | Patient252F  |
| 10231 | Patient097C  | Patient194   |
| 10231 | Patient108F  | Patient194   |
| 10231 | Patient108H  | Patient194   |
| 10231 | Patient194   | Patient196B  |
| 10231 | Patient194   | Patient252B  |
| 10232 | Patient007B  | Patient247B  |
| 10232 | Patient007B  | Patient247C  |
| 10232 | Patient022A  | Patient045C  |
| 10232 | Patient038   | Patient091A  |
| 10232 | Patient079A1 | Patient091A  |
| 10232 | Patient079A2 | Patient091A  |
| 10232 | Patient091A  | Patient196C  |
| 10233 | Patient007B  | Patient189B  |
| 10233 | Patient007B  | Patient189E  |

|       |             |             |
|-------|-------------|-------------|
| 10233 | Patient031  | Patient247A |
| 10233 | Patient091A | Patient097A |
| 10233 | Patient091A | Patient109A |
| 10233 | Patient091A | Patient109B |
| 10233 | Patient091A | Patient210  |
| 10233 | Patient091A | Patient252B |
| 10233 | Patient194  | Patient196C |
| 10234 | Patient031  | Patient247C |
| 10234 | Patient091A | Patient108D |
| 10234 | Patient091A | Patient222E |
| 10234 | Patient097B | Patient194  |
| 10234 | Patient131  | Patient194  |
| 10234 | Patient194  | Patient222A |
| 10235 | Patient022A | Patient074B |
| 10235 | Patient022A | Patient123B |
| 10235 | Patient091A | Patient097B |
| 10235 | Patient091A | Patient108G |
| 10235 | Patient091A | Patient109D |
| 10235 | Patient091A | Patient127A |
| 10235 | Patient099A | Patient194  |
| 10235 | Patient099B | Patient194  |
| 10235 | Patient127A | Patient194  |
| 10235 | Patient194  | Patient265  |
| 10236 | Patient007A | Patient055  |
| 10236 | Patient007B | Patient247E |
| 10236 | Patient022A | Patient074A |
| 10236 | Patient022A | Patient183E |
| 10236 | Patient031  | Patient247B |
| 10236 | Patient091A | Patient097C |
| 10236 | Patient194  | Patient201B |
| 10237 | Patient007B | Patient055  |
| 10237 | Patient022A | Patient123D |
| 10237 | Patient091A | Patient108F |
| 10237 | Patient091A | Patient108H |
| 10237 | Patient194  | Patient236A |
| 10238 | Patient007A | Patient222B |
| 10238 | Patient022A | Patient074C |
| 10238 | Patient022A | Patient183A |
| 10238 | Patient091A | Patient099B |
| 10238 | Patient091A | Patient196D |
| 10238 | Patient091A | Patient222D |
| 10238 | Patient091A | Patient222F |
| 10238 | Patient091A | Patient236A |
| 10238 | Patient091A | Patient265  |
| 10239 | Patient022A | Patient026F |
| 10239 | Patient091A | Patient187  |
| 10239 | Patient194  | Patient222E |
| 10240 | Patient091A | Patient099A |
| 10240 | Patient127B | Patient194  |
| 10240 | Patient194  | Patient196D |

|       |              |             |
|-------|--------------|-------------|
| 10240 | Patient194   | Patient222F |
| 10241 | Patient007A  | Patient126E |
| 10241 | Patient007A  | Patient232B |
| 10241 | Patient022A  | Patient103A |
| 10241 | Patient091A  | Patient126D |
| 10241 | Patient091A  | Patient127B |
| 10241 | Patient099C  | Patient194  |
| 10241 | Patient099D  | Patient194  |
| 10241 | Patient194   | Patient263B |
| 10241 | Patient202   | Patient241  |
| 10242 | Patient022A  | Patient026B |
| 10242 | Patient091A  | Patient159  |
| 10242 | Patient091A  | Patient184  |
| 10242 | Patient091A  | Patient263B |
| 10243 | Patient022A  | Patient103B |
| 10243 | Patient031   | Patient247E |
| 10243 | Patient091A  | Patient201B |
| 10243 | Patient183D  | Patient202  |
| 10243 | Patient187   | Patient194  |
| 10243 | Patient194   | Patient201E |
| 10244 | Patient022A  | Patient074D |
| 10244 | Patient022A  | Patient103C |
| 10244 | Patient031   | Patient213B |
| 10244 | Patient081C  | Patient202  |
| 10244 | Patient091A  | Patient099C |
| 10244 | Patient091A  | Patient149B |
| 10244 | Patient194   | Patient201A |
| 10244 | Patient194   | Patient222D |
| 10245 | Patient022A  | Patient026A |
| 10245 | Patient081D  | Patient202  |
| 10245 | Patient184   | Patient194  |
| 10246 | Patient007A  | Patient104B |
| 10246 | Patient007B  | Patient222B |
| 10246 | Patient031   | Patient104B |
| 10246 | Patient031   | Patient232B |
| 10246 | Patient091A  | Patient099D |
| 10246 | Patient149B  | Patient194  |
| 10247 | Patient007A  | Patient232A |
| 10247 | Patient007B  | Patient126E |
| 10247 | Patient007B  | Patient232B |
| 10247 | Patient091A  | Patient126E |
| 10247 | Patient126E  | Patient194  |
| 10247 | Patient194   | Patient232B |
| 10248 | Patient007A  | Patient232E |
| 10248 | Patient021A2 | Patient091A |
| 10248 | Patient022A  | Patient126C |
| 10248 | Patient022A  | Patient235E |
| 10248 | Patient031   | Patient104A |
| 10248 | Patient031   | Patient204  |
| 10248 | Patient031   | Patient232D |

|       |              |             |
|-------|--------------|-------------|
| 10248 | Patient091A  | Patient201A |
| 10248 | Patient091A  | Patient201E |
| 10249 | Patient007A  | Patient104A |
| 10249 | Patient031   | Patient232E |
| 10249 | Patient091A  | Patient218A |
| 10249 | Patient194   | Patient218A |
| 10250 | Patient007A  | Patient232D |
| 10250 | Patient022A  | Patient220B |
| 10250 | Patient022A  | Patient235F |
| 10250 | Patient031   | Patient126E |
| 10250 | Patient031   | Patient232C |
| 10250 | Patient183B  | Patient202  |
| 10250 | Patient183C  | Patient202  |
| 10251 | Patient007A  | Patient220A |
| 10251 | Patient007A  | Patient232C |
| 10251 | Patient021A1 | Patient091A |
| 10251 | Patient022A  | Patient074E |
| 10251 | Patient031   | Patient232A |
| 10251 | Patient091A  | Patient232B |
| 10251 | Patient183A  | Patient202  |
| 10251 | Patient183E  | Patient202  |
| 10251 | Patient194   | Patient232E |
| 10252 | Patient007A  | Patient099E |
| 10252 | Patient007B  | Patient104B |
| 10252 | Patient022A  | Patient126A |
| 10252 | Patient091A  | Patient218B |
| 10253 | Patient007B  | Patient232A |
| 10253 | Patient066B  | Patient191  |
| 10253 | Patient091A  | Patient232E |
| 10253 | Patient194   | Patient218B |
| 10253 | Patient194   | Patient232D |
| 10254 | Patient007B  | Patient232E |
| 10254 | Patient022A  | Patient120A |
| 10254 | Patient091A  | Patient131  |
| 10254 | Patient091A  | Patient246B |
| 10254 | Patient091A  | Patient246C |
| 10254 | Patient194   | Patient232A |
| 10255 | Patient007B  | Patient104A |
| 10255 | Patient031   | Patient252D |
| 10255 | Patient091A  | Patient232A |
| 10255 | Patient202   | Patient207  |
| 10256 | Patient007B  | Patient232D |
| 10256 | Patient091A  | Patient232D |
| 10256 | Patient177   | Patient202  |
| 10256 | Patient194   | Patient232C |
| 10256 | Patient194   | Patient246B |
| 10257 | Patient007B  | Patient220A |
| 10257 | Patient007B  | Patient232C |
| 10257 | Patient031   | Patient159  |
| 10257 | Patient194   | Patient246C |

|       |             |             |
|-------|-------------|-------------|
| 10258 | Patient007A | Patient196A |
| 10258 | Patient007A | Patient236B |
| 10258 | Patient007B | Patient099E |
| 10258 | Patient031  | Patient099E |
| 10258 | Patient091A | Patient232C |
| 10259 | Patient007A | Patient196B |
| 10259 | Patient007A | Patient222A |
| 10259 | Patient007A | Patient222F |
| 10259 | Patient007A | Patient252D |
| 10259 | Patient091A | Patient246D |
| 10259 | Patient091A | Patient246E |
| 10260 | Patient007A | Patient222D |
| 10261 | Patient007A | Patient222E |
| 10262 | Patient022A | Patient235B |
| 10262 | Patient031  | Patient126D |
| 10262 | Patient031  | Patient220A |
| 10262 | Patient031  | Patient222B |
| 10262 | Patient093D | Patient202  |
| 10262 | Patient194  | Patient246E |
| 10263 | Patient007A | Patient196C |
| 10263 | Patient022A | Patient235C |
| 10263 | Patient194  | Patient246D |
| 10264 | Patient007A | Patient196E |
| 10264 | Patient007B | Patient196A |
| 10264 | Patient007B | Patient236B |
| 10264 | Patient094A | Patient202  |
| 10265 | Patient007A | Patient127A |
| 10265 | Patient007B | Patient196B |
| 10265 | Patient007B | Patient222A |
| 10265 | Patient007B | Patient222F |
| 10265 | Patient007B | Patient252D |
| 10265 | Patient032D | Patient072  |
| 10265 | Patient093A | Patient202  |
| 10266 | Patient007B | Patient222D |
| 10266 | Patient031  | Patient236B |
| 10266 | Patient066A | Patient202  |
| 10266 | Patient194  | Patient204  |
| 10267 | Patient007B | Patient222E |
| 10267 | Patient022A | Patient195  |
| 10267 | Patient031  | Patient045D |
| 10267 | Patient031  | Patient265  |
| 10268 | Patient007A | Patient196D |
| 10268 | Patient007A | Patient236A |
| 10268 | Patient031  | Patient201B |
| 10269 | Patient007A | Patient099A |
| 10269 | Patient007A | Patient099B |
| 10269 | Patient007A | Patient099C |
| 10269 | Patient007B | Patient196C |
| 10269 | Patient031  | Patient127B |
| 10269 | Patient031  | Patient222A |

|       |             |              |
|-------|-------------|--------------|
| 10269 | Patient202  | Patient242   |
| 10270 | Patient007A | Patient265   |
| 10270 | Patient007B | Patient196E  |
| 10270 | Patient022A | Patient192A  |
| 10270 | Patient031  | Patient127A  |
| 10270 | Patient031  | Patient236A  |
| 10271 | Patient007A | Patient187   |
| 10271 | Patient007B | Patient127A  |
| 10271 | Patient031  | Patient187   |
| 10271 | Patient031  | Patient218A  |
| 10272 | Patient031  | Patient099B  |
| 10272 | Patient094C | Patient202   |
| 10273 | Patient022A | Patient192C  |
| 10273 | Patient031  | Patient108B2 |
| 10274 | Patient007B | Patient196D  |
| 10274 | Patient007B | Patient236A  |
| 10274 | Patient023  | Patient194   |
| 10274 | Patient031  | Patient099A  |
| 10274 | Patient094B | Patient202   |
| 10275 | Patient007A | Patient263B  |
| 10275 | Patient007B | Patient099A  |
| 10275 | Patient007B | Patient099B  |
| 10275 | Patient007B | Patient099C  |
| 10275 | Patient031  | Patient222E  |
| 10275 | Patient093E | Patient202   |
| 10276 | Patient007A | Patient127B  |
| 10276 | Patient007A | Patient159   |
| 10276 | Patient007B | Patient265   |
| 10276 | Patient022A | Patient192B  |
| 10276 | Patient031  | Patient201E  |
| 10276 | Patient054  | Patient091A  |
| 10277 | Patient007A | Patient099D  |
| 10277 | Patient007A | Patient184   |
| 10277 | Patient007A | Patient218A  |
| 10277 | Patient007B | Patient187   |
| 10277 | Patient031  | Patient108B1 |
| 10277 | Patient031  | Patient196A  |
| 10278 | Patient007B | Patient159   |
| 10278 | Patient031  | Patient196C  |
| 10278 | Patient031  | Patient218B  |
| 10279 | Patient007A | Patient201B  |
| 10279 | Patient007A | Patient218B  |
| 10279 | Patient031  | Patient196B  |
| 10279 | Patient031  | Patient201A  |
| 10279 | Patient031  | Patient222D  |
| 10279 | Patient031  | Patient222F  |
| 10279 | Patient031  | Patient246D  |
| 10280 | Patient022A | Patient092H  |
| 10280 | Patient031  | Patient196E  |
| 10280 | Patient031  | Patient246B  |

|       |              |             |
|-------|--------------|-------------|
| 10280 | Patient031   | Patient246C |
| 10280 | Patient091A  | Patient205  |
| 10281 | Patient007A  | Patient201E |
| 10281 | Patient007B  | Patient263B |
| 10281 | Patient031   | Patient099C |
| 10281 | Patient092C  | Patient202  |
| 10282 | Patient007A  | Patient149B |
| 10282 | Patient007A  | Patient201A |
| 10282 | Patient007B  | Patient127B |
| 10282 | Patient022A  | Patient092G |
| 10282 | Patient022A  | Patient103D |
| 10282 | Patient031   | Patient099D |
| 10282 | Patient031   | Patient184  |
| 10282 | Patient031   | Patient189B |
| 10282 | Patient072   | Patient242  |
| 10283 | Patient007A  | Patient246C |
| 10283 | Patient007B  | Patient099D |
| 10283 | Patient007B  | Patient184  |
| 10283 | Patient007B  | Patient218A |
| 10283 | Patient031   | Patient097A |
| 10283 | Patient031   | Patient263B |
| 10283 | Patient093C  | Patient202  |
| 10284 | Patient007A  | Patient246B |
| 10284 | Patient031   | Patient189E |
| 10285 | Patient007B  | Patient201B |
| 10285 | Patient007B  | Patient218B |
| 10285 | Patient022A  | Patient192E |
| 10285 | Patient026D  | Patient202  |
| 10285 | Patient031   | Patient097C |
| 10286 | Patient007A  | Patient246E |
| 10286 | Patient022A  | Patient103E |
| 10286 | Patient022A  | Patient192F |
| 10286 | Patient031   | Patient189A |
| 10287 | Patient007B  | Patient201E |
| 10287 | Patient021A1 | Patient031  |
| 10287 | Patient021A2 | Patient031  |
| 10287 | Patient031   | Patient097D |
| 10287 | Patient031   | Patient097E |
| 10287 | Patient031   | Patient205  |
| 10287 | Patient031   | Patient246E |
| 10288 | Patient007B  | Patient149B |
| 10288 | Patient007B  | Patient201A |
| 10288 | Patient031   | Patient097B |
| 10288 | Patient031   | Patient149B |
| 10289 | Patient007B  | Patient246C |
| 10289 | Patient022A  | Patient092A |
| 10289 | Patient022A  | Patient092E |
| 10290 | Patient007B  | Patient246B |
| 10291 | Patient022A  | Patient092B |
| 10292 | Patient007A  | Patient246D |



|       |              |              |
|-------|--------------|--------------|
| 10292 | Patient007B  | Patient246E  |
| 10293 | Patient023   | Patient091A  |
| 10293 | Patient026E  | Patient202   |
| 10293 | Patient031   | Patient196D  |
| 10294 | Patient021A2 | Patient033   |
| 10294 | Patient164   | Patient202   |
| 10295 | Patient202   | Patient222C  |
| 10296 | Patient021A1 | Patient033   |
| 10297 | Patient031   | Patient108A  |
| 10298 | Patient007B  | Patient246D  |
| 10298 | Patient202   | Patient206   |
| 10299 | Patient093B  | Patient202   |
| 10300 | Patient031   | Patient131   |
| 10301 | Patient072   | Patient241   |
| 10301 | Patient202   | Patient230D  |
| 10301 | Patient202   | Patient263A  |
| 10303 | Patient031   | Patient109A  |
| 10304 | Patient031   | Patient109B  |
| 10304 | Patient031   | Patient252B  |
| 10305 | Patient094D  | Patient202   |
| 10306 | Patient031   | Patient108G  |
| 10306 | Patient031   | Patient252A  |
| 10308 | Patient031   | Patient108D  |
| 10308 | Patient031   | Patient109C  |
| 10308 | Patient054   | Patient194   |
| 10308 | Patient054   | Patient202   |
| 10308 | Patient150C  | Patient202   |
| 10309 | Patient031   | Patient109E  |
| 10309 | Patient196F  | Patient202   |
| 10310 | Patient031   | Patient108F  |
| 10311 | Patient031   | Patient108H  |
| 10311 | Patient150A  | Patient202   |
| 10311 | Patient150B  | Patient202   |
| 10312 | Patient031   | Patient109D  |
| 10312 | Patient072   | Patient092C  |
| 10312 | Patient094E  | Patient202   |
| 10313 | Patient031   | Patient252F  |
| 10317 | Patient007A  | Patient021A2 |
| 10318 | Patient126E  | Patient202   |
| 10321 | Patient007A  | Patient021A1 |
| 10321 | Patient023   | Patient031   |
| 10323 | Patient007B  | Patient021A2 |
| 10324 | Patient031   | Patient079A1 |
| 10324 | Patient031   | Patient079A2 |
| 10324 | Patient031   | Patient079C  |
| 10324 | Patient161B  | Patient202   |
| 10325 | Patient022A  | Patient120B  |
| 10326 | Patient045A  | Patient202   |
| 10327 | Patient007B  | Patient021A1 |
| 10328 | Patient022A  | Patient120C  |

|       |              |             |
|-------|--------------|-------------|
| 10328 | Patient022A  | Patient120D |
| 10329 | Patient045C  | Patient202  |
| 10329 | Patient194   | Patient205  |
| 10330 | Patient031   | Patient079B |
| 10332 | Patient045B  | Patient202  |
| 10344 | Patient022A  | Patient146  |
| 10344 | Patient092D  | Patient202  |
| 10348 | Patient072   | Patient207  |
| 10349 | Patient202   | Patient232B |
| 10354 | Patient032D  | Patient091A |
| 10354 | Patient202   | Patient232D |
| 10354 | Patient202   | Patient232E |
| 10355 | Patient031   | Patient075  |
| 10355 | Patient053A1 | Patient194  |
| 10355 | Patient202   | Patient232C |
| 10356 | Patient202   | Patient232A |
| 10359 | Patient072   | Patient206  |
| 10364 | Patient072   | Patient086C |
| 10365 | Patient032D  | Patient194  |
| 10368 | Patient072   | Patient092D |
| 10369 | Patient022B  | Patient202  |
| 10371 | Patient053C  | Patient202  |
| 10371 | Patient202   | Patient204  |
| 10372 | Patient053A2 | Patient202  |
| 10372 | Patient053B  | Patient202  |
| 10376 | Patient091A  | Patient207  |
| 10377 | Patient007A  | Patient045D |
| 10377 | Patient072   | Patient086A |
| 10378 | Patient013   | Patient207  |
| 10378 | Patient072   | Patient086B |
| 10378 | Patient086C  | Patient202  |
| 10379 | Patient072   | Patient086E |
| 10379 | Patient072   | Patient164  |
| 10379 | Patient202   | Patient213A |
| 10382 | Patient086A  | Patient202  |
| 10382 | Patient086E  | Patient202  |
| 10384 | Patient072   | Patient121A |
| 10385 | Patient007B  | Patient045D |
| 10386 | Patient007A  | Patient100A |
| 10386 | Patient072   | Patient090  |
| 10387 | Patient086B  | Patient202  |
| 10390 | Patient072   | Patient081E |
| 10392 | Patient007B  | Patient100A |
| 10392 | Patient072   | Patient121B |
| 10393 | Patient022B  | Patient072  |
| 10393 | Patient202   | Patient258E |
| 10394 | Patient032A  | Patient202  |
| 10394 | Patient053A1 | Patient072  |
| 10396 | Patient032B  | Patient202  |
| 10396 | Patient032D  | Patient055  |

|       |              |              |
|-------|--------------|--------------|
| 10396 | Patient072   | Patient081B  |
| 10396 | Patient072   | Patient081F  |
| 10396 | Patient072   | Patient133   |
| 10397 | Patient072   | Patient081C  |
| 10398 | Patient072   | Patient081A2 |
| 10399 | Patient072   | Patient081A1 |
| 10399 | Patient072   | Patient081D  |
| 10399 | Patient072   | Patient176   |
| 10399 | Patient072   | Patient251   |
| 10399 | Patient145C  | Patient202   |
| 10400 | Patient034A  | Patient202   |
| 10400 | Patient072   | Patient150C  |
| 10401 | Patient007A  | Patient032D  |
| 10401 | Patient072   | Patient150A  |
| 10402 | Patient194   | Patient258A1 |
| 10403 | Patient013   | Patient090   |
| 10403 | Patient034D  | Patient202   |
| 10403 | Patient034E  | Patient202   |
| 10403 | Patient194   | Patient251   |
| 10404 | Patient086C  | Patient091A  |
| 10404 | Patient194   | Patient258B  |
| 10405 | Patient013   | Patient164   |
| 10405 | Patient034C  | Patient202   |
| 10405 | Patient141D  | Patient202   |
| 10405 | Patient194   | Patient258D  |
| 10405 | Patient194   | Patient258G  |
| 10405 | Patient202   | Patient235F  |
| 10406 | Patient007B  | Patient032D  |
| 10406 | Patient194   | Patient258A2 |
| 10406 | Patient202   | Patient235E  |
| 10407 | Patient034B  | Patient202   |
| 10407 | Patient072   | Patient141G  |
| 10407 | Patient194   | Patient258F  |
| 10407 | Patient202   | Patient217A  |
| 10407 | Patient202   | Patient217C  |
| 10409 | Patient126D  | Patient202   |
| 10409 | Patient202   | Patient217B  |
| 10409 | Patient202   | Patient217D  |
| 10409 | Patient202   | Patient217F  |
| 10410 | Patient091A  | Patient242   |
| 10410 | Patient202   | Patient217E  |
| 10410 | Patient202   | Patient217H  |
| 10411 | Patient086A  | Patient091A  |
| 10411 | Patient086E  | Patient091A  |
| 10411 | Patient202   | Patient217I  |
| 10412 | Patient053A2 | Patient072   |
| 10412 | Patient053C  | Patient072   |
| 10413 | Patient053B  | Patient072   |
| 10413 | Patient072   | Patient150B  |
| 10413 | Patient072   | Patient195   |

|       |              |              |
|-------|--------------|--------------|
| 10413 | Patient145A  | Patient202   |
| 10414 | Patient072   | Patient167   |
| 10414 | Patient086B  | Patient091A  |
| 10415 | Patient072   | Patient141C  |
| 10415 | Patient194   | Patient258E  |
| 10415 | Patient202   | Patient205   |
| 10416 | Patient045D  | Patient202   |
| 10416 | Patient072   | Patient141D  |
| 10416 | Patient202   | Patient217J  |
| 10417 | Patient072   | Patient126A  |
| 10417 | Patient072   | Patient141A  |
| 10417 | Patient091A  | Patient241   |
| 10417 | Patient123A  | Patient202   |
| 10418 | Patient032A  | Patient072   |
| 10418 | Patient072   | Patient141B  |
| 10418 | Patient202   | Patient261A  |
| 10419 | Patient055   | Patient207   |
| 10420 | Patient032B  | Patient072   |
| 10420 | Patient072   | Patient145B  |
| 10420 | Patient194   | Patient241   |
| 10420 | Patient202   | Patient235A  |
| 10421 | Patient123B  | Patient202   |
| 10421 | Patient123C  | Patient202   |
| 10422 | Patient013   | Patient133   |
| 10422 | Patient072   | Patient261G  |
| 10423 | Patient092C  | Patient194   |
| 10424 | Patient072   | Patient074A  |
| 10424 | Patient072   | Patient074B  |
| 10424 | Patient072   | Patient145C  |
| 10424 | Patient072   | Patient230C  |
| 10425 | Patient032E  | Patient072   |
| 10425 | Patient034A  | Patient072   |
| 10425 | Patient072   | Patient224A  |
| 10425 | Patient072   | Patient230A  |
| 10425 | Patient072   | Patient261A  |
| 10425 | Patient202   | Patient261B  |
| 10426 | Patient007A  | Patient097A  |
| 10426 | Patient053A1 | Patient091A  |
| 10426 | Patient072   | Patient074D  |
| 10426 | Patient072   | Patient126C  |
| 10426 | Patient072   | Patient141F  |
| 10426 | Patient072   | Patient161B  |
| 10426 | Patient072   | Patient224B  |
| 10426 | Patient072   | Patient230G  |
| 10426 | Patient072   | Patient258A1 |
| 10426 | Patient072   | Patient258D  |
| 10427 | Patient034E  | Patient072   |
| 10427 | Patient053A1 | Patient055   |
| 10427 | Patient072   | Patient258F  |
| 10427 | Patient072   | Patient258G  |

|       |             |              |
|-------|-------------|--------------|
| 10427 | Patient123D | Patient202   |
| 10428 | Patient032C | Patient072   |
| 10428 | Patient034D | Patient072   |
| 10428 | Patient066D | Patient072   |
| 10428 | Patient072  | Patient123A  |
| 10428 | Patient072  | Patient217A  |
| 10428 | Patient072  | Patient258B  |
| 10429 | Patient066F | Patient072   |
| 10429 | Patient194  | Patient207   |
| 10430 | Patient072  | Patient074C  |
| 10430 | Patient072  | Patient123B  |
| 10430 | Patient072  | Patient192D  |
| 10430 | Patient072  | Patient258E  |
| 10430 | Patient202  | Patient261D  |
| 10431 | Patient007A | Patient097D  |
| 10431 | Patient026C | Patient202   |
| 10431 | Patient034B | Patient072   |
| 10431 | Patient034C | Patient072   |
| 10431 | Patient072  | Patient217B  |
| 10431 | Patient072  | Patient217C  |
| 10431 | Patient072  | Patient217E  |
| 10431 | Patient072  | Patient217F  |
| 10431 | Patient072  | Patient217I  |
| 10431 | Patient072  | Patient220B  |
| 10431 | Patient072  | Patient235A  |
| 10431 | Patient072  | Patient261B  |
| 10431 | Patient072  | Patient261E  |
| 10432 | Patient072  | Patient123C  |
| 10432 | Patient072  | Patient217D  |
| 10432 | Patient072  | Patient258A2 |
| 10432 | Patient086C | Patient194   |
| 10433 | Patient007B | Patient097A  |
| 10433 | Patient032D | Patient128   |
| 10433 | Patient072  | Patient103C  |
| 10433 | Patient072  | Patient217H  |
| 10433 | Patient072  | Patient230E  |
| 10434 | Patient066E | Patient072   |
| 10435 | Patient072  | Patient103B  |
| 10435 | Patient072  | Patient177   |
| 10436 | Patient007A | Patient097C  |
| 10436 | Patient007A | Patient097E  |
| 10436 | Patient072  | Patient123D  |
| 10436 | Patient072  | Patient145A  |
| 10436 | Patient072  | Patient213A  |
| 10437 | Patient007B | Patient097D  |
| 10437 | Patient026C | Patient072   |
| 10437 | Patient072  | Patient074E  |
| 10437 | Patient072  | Patient261C  |
| 10437 | Patient092H | Patient202   |
| 10438 | Patient007A | Patient126D  |

|       |              |              |
|-------|--------------|--------------|
| 10438 | Patient072   | Patient181A  |
| 10438 | Patient072   | Patient230D  |
| 10438 | Patient072   | Patient230F  |
| 10438 | Patient092A  | Patient202   |
| 10439 | Patient007A  | Patient097B  |
| 10439 | Patient013   | Patient081C  |
| 10439 | Patient026D  | Patient072   |
| 10439 | Patient072   | Patient181B  |
| 10439 | Patient092G  | Patient202   |
| 10439 | Patient108B1 | Patient202   |
| 10439 | Patient108B2 | Patient202   |
| 10440 | Patient013   | Patient141G  |
| 10440 | Patient072   | Patient217J  |
| 10440 | Patient072   | Patient261D  |
| 10441 | Patient013   | Patient081D  |
| 10441 | Patient013   | Patient167   |
| 10441 | Patient072   | Patient183A  |
| 10441 | Patient072   | Patient230B  |
| 10441 | Patient189B  | Patient202   |
| 10442 | Patient007B  | Patient097C  |
| 10442 | Patient007B  | Patient097E  |
| 10442 | Patient026E  | Patient072   |
| 10442 | Patient090   | Patient194   |
| 10442 | Patient189A  | Patient202   |
| 10443 | Patient026B  | Patient072   |
| 10443 | Patient086A  | Patient194   |
| 10444 | Patient007B  | Patient126D  |
| 10444 | Patient072   | Patient103A  |
| 10444 | Patient072   | Patient173A  |
| 10444 | Patient086E  | Patient194   |
| 10444 | Patient092B  | Patient202   |
| 10445 | Patient007A  | Patient108B2 |
| 10445 | Patient007A  | Patient131   |
| 10445 | Patient007B  | Patient097B  |
| 10445 | Patient026C  | Patient194   |
| 10445 | Patient092E  | Patient202   |
| 10445 | Patient189E  | Patient202   |
| 10446 | Patient013   | Patient150A  |
| 10446 | Patient013   | Patient150C  |
| 10446 | Patient026A  | Patient072   |
| 10446 | Patient026F  | Patient072   |
| 10447 | Patient081E  | Patient202   |
| 10447 | Patient086B  | Patient194   |
| 10448 | Patient013   | Patient145B  |
| 10448 | Patient072   | Patient235B  |
| 10449 | Patient032D  | Patient033   |
| 10449 | Patient072   | Patient173B  |
| 10449 | Patient072   | Patient235C  |
| 10449 | Patient081B  | Patient202   |
| 10449 | Patient194   | Patient217A  |

|       |              |              |
|-------|--------------|--------------|
| 10450 | Patient007A  | Patient108B1 |
| 10450 | Patient007B  | Patient108B2 |
| 10450 | Patient013   | Patient261G  |
| 10450 | Patient081A2 | Patient202   |
| 10450 | Patient194   | Patient217H  |
| 10451 | Patient007B  | Patient131   |
| 10451 | Patient081A1 | Patient202   |
| 10451 | Patient192A  | Patient202   |
| 10451 | Patient194   | Patient217B  |
| 10451 | Patient194   | Patient217C  |
| 10451 | Patient194   | Patient217D  |
| 10451 | Patient194   | Patient217E  |
| 10451 | Patient194   | Patient217I  |
| 10453 | Patient013   | Patient032E  |
| 10453 | Patient013   | Patient230C  |
| 10453 | Patient045A  | Patient072   |
| 10453 | Patient072   | Patient183D  |
| 10453 | Patient194   | Patient217F  |
| 10454 | Patient072   | Patient235E  |
| 10454 | Patient081F  | Patient202   |
| 10455 | Patient013   | Patient141F  |
| 10455 | Patient013   | Patient230G  |
| 10455 | Patient072   | Patient183B  |
| 10455 | Patient072   | Patient183C  |
| 10455 | Patient072   | Patient235F  |
| 10456 | Patient007B  | Patient108B1 |
| 10456 | Patient013   | Patient032C  |
| 10456 | Patient092D  | Patient194   |
| 10456 | Patient192C  | Patient202   |
| 10457 | Patient045C  | Patient072   |
| 10457 | Patient091A  | Patient206   |
| 10458 | Patient033   | Patient251   |
| 10458 | Patient045B  | Patient072   |
| 10458 | Patient131   | Patient202   |
| 10458 | Patient192B  | Patient202   |
| 10458 | Patient202   | Patient213B  |
| 10459 | Patient013   | Patient150B  |
| 10459 | Patient013   | Patient258D  |
| 10459 | Patient072   | Patient183E  |
| 10460 | Patient013   | Patient258A1 |
| 10460 | Patient013   | Patient258F  |
| 10460 | Patient013   | Patient258G  |
| 10460 | Patient013   | Patient261E  |
| 10461 | Patient013   | Patient258B  |
| 10461 | Patient192D  | Patient194   |
| 10461 | Patient194   | Patient217J  |
| 10461 | Patient194   | Patient242   |
| 10463 | Patient192D  | Patient202   |
| 10465 | Patient007A  | Patient108A  |
| 10465 | Patient013   | Patient258A2 |

|       |             |              |
|-------|-------------|--------------|
| 10466 | Patient013  | Patient241   |
| 10466 | Patient013  | Patient261C  |
| 10467 | Patient013  | Patient161B  |
| 10467 | Patient055  | Patient258D  |
| 10467 | Patient157  | Patient202   |
| 10469 | Patient007A | Patient108D  |
| 10469 | Patient007A | Patient108G  |
| 10469 | Patient104B | Patient202   |
| 10470 | Patient055  | Patient258A1 |
| 10470 | Patient055  | Patient258B  |
| 10470 | Patient055  | Patient258G  |
| 10471 | Patient007A | Patient109A  |
| 10471 | Patient007B | Patient108A  |
| 10472 | Patient007A | Patient108H  |
| 10472 | Patient007A | Patient252A  |
| 10472 | Patient013  | Patient206   |
| 10472 | Patient055  | Patient258F  |
| 10472 | Patient192E | Patient202   |
| 10473 | Patient103A | Patient202   |
| 10473 | Patient192F | Patient202   |
| 10474 | Patient013  | Patient183A  |
| 10474 | Patient055  | Patient258A2 |
| 10474 | Patient091A | Patient133   |
| 10474 | Patient202  | Patient220A  |
| 10475 | Patient007B | Patient108D  |
| 10475 | Patient007B | Patient108G  |
| 10475 | Patient023  | Patient202   |
| 10475 | Patient066D | Patient202   |
| 10475 | Patient072  | Patient092H  |
| 10475 | Patient202  | Patient222B  |
| 10476 | Patient007A | Patient252B  |
| 10476 | Patient055  | Patient086C  |
| 10476 | Patient072  | Patient092G  |
| 10476 | Patient091A | Patient192D  |
| 10477 | Patient007B | Patient109A  |
| 10477 | Patient104A | Patient202   |
| 10478 | Patient007A | Patient109E  |
| 10478 | Patient007B | Patient108H  |
| 10478 | Patient007B | Patient252A  |
| 10478 | Patient066F | Patient202   |
| 10478 | Patient164  | Patient194   |
| 10478 | Patient202  | Patient236B  |
| 10479 | Patient007A | Patient109B  |
| 10479 | Patient007A | Patient109C  |
| 10479 | Patient007A | Patient252F  |
| 10479 | Patient072  | Patient092E  |
| 10479 | Patient099E | Patient202   |
| 10480 | Patient007A | Patient108F  |
| 10480 | Patient013  | Patient026D  |
| 10480 | Patient066E | Patient202   |



|       |             |              |
|-------|-------------|--------------|
| 10480 | Patient091A | Patient164   |
| 10480 | Patient202  | Patient247D  |
| 10480 | Patient202  | Patient252D  |
| 10481 | Patient007A | Patient109D  |
| 10481 | Patient055  | Patient086E  |
| 10481 | Patient055  | Patient251   |
| 10481 | Patient194  | Patient206   |
| 10482 | Patient007B | Patient252B  |
| 10482 | Patient033  | Patient246A  |
| 10482 | Patient055  | Patient086A  |
| 10482 | Patient090  | Patient091A  |
| 10482 | Patient120A | Patient202   |
| 10483 | Patient072  | Patient092A  |
| 10483 | Patient127A | Patient202   |
| 10483 | Patient133  | Patient194   |
| 10484 | Patient007A | Patient079A1 |
| 10484 | Patient007A | Patient079C  |
| 10484 | Patient007B | Patient109E  |
| 10484 | Patient013  | Patient026E  |
| 10484 | Patient033  | Patient246C  |
| 10484 | Patient055  | Patient086B  |
| 10484 | Patient055  | Patient090   |
| 10484 | Patient121A | Patient202   |
| 10485 | Patient007B | Patient109B  |
| 10485 | Patient007B | Patient109C  |
| 10485 | Patient007B | Patient252F  |
| 10485 | Patient072  | Patient120A  |
| 10485 | Patient072  | Patient192A  |
| 10485 | Patient091A | Patient258A1 |
| 10485 | Patient202  | Patient230A  |
| 10486 | Patient007B | Patient108F  |
| 10486 | Patient013  | Patient183D  |
| 10486 | Patient013  | Patient251   |
| 10486 | Patient033  | Patient246E  |
| 10486 | Patient055  | Patient092C  |
| 10486 | Patient055  | Patient176   |
| 10486 | Patient072  | Patient092B  |
| 10486 | Patient072  | Patient103D  |
| 10486 | Patient202  | Patient222A  |
| 10486 | Patient202  | Patient236A  |
| 10486 | Patient202  | Patient246A  |
| 10487 | Patient007A | Patient079A2 |
| 10487 | Patient007B | Patient109D  |
| 10487 | Patient013  | Patient183C  |
| 10487 | Patient033  | Patient086C  |
| 10487 | Patient033  | Patient246B  |
| 10487 | Patient072  | Patient192B  |
| 10487 | Patient091A | Patient251   |
| 10487 | Patient091A | Patient258B  |
| 10487 | Patient121B | Patient202   |

|       |              |              |
|-------|--------------|--------------|
| 10487 | Patient187   | Patient202   |
| 10487 | Patient202   | Patient265   |
| 10488 | Patient013   | Patient242   |
| 10488 | Patient202   | Patient218A  |
| 10488 | Patient202   | Patient220B  |
| 10489 | Patient091A  | Patient258D  |
| 10489 | Patient091A  | Patient258G  |
| 10489 | Patient159   | Patient202   |
| 10490 | Patient007B  | Patient079A1 |
| 10490 | Patient007B  | Patient079C  |
| 10490 | Patient013   | Patient183B  |
| 10490 | Patient013   | Patient230D  |
| 10490 | Patient091A  | Patient258A2 |
| 10490 | Patient127B  | Patient202   |
| 10491 | Patient091A  | Patient258F  |
| 10491 | Patient202   | Patient222F  |
| 10492 | Patient013   | Patient045A  |
| 10492 | Patient013   | Patient183E  |
| 10492 | Patient072   | Patient103E  |
| 10492 | Patient099A  | Patient202   |
| 10492 | Patient100A  | Patient202   |
| 10492 | Patient202   | Patient222D  |
| 10492 | Patient202   | Patient222E  |
| 10493 | Patient007B  | Patient079A2 |
| 10493 | Patient033   | Patient246D  |
| 10493 | Patient055   | Patient133   |
| 10493 | Patient072   | Patient192C  |
| 10493 | Patient081B  | Patient194   |
| 10493 | Patient121A  | Patient194   |
| 10494 | Patient099B  | Patient202   |
| 10495 | Patient007A  | Patient079B  |
| 10495 | Patient033   | Patient086E  |
| 10495 | Patient081E  | Patient194   |
| 10495 | Patient141A  | Patient202   |
| 10495 | Patient202   | Patient218B  |
| 10496 | Patient013   | Patient045C  |
| 10496 | Patient033   | Patient086A  |
| 10496 | Patient072   | Patient120B  |
| 10497 | Patient013   | Patient045B  |
| 10497 | Patient033   | Patient086B  |
| 10497 | Patient055   | Patient258E  |
| 10497 | Patient099C  | Patient202   |
| 10497 | Patient201B  | Patient202   |
| 10498 | Patient072   | Patient120C  |
| 10498 | Patient072   | Patient120D  |
| 10498 | Patient081F  | Patient194   |
| 10499 | Patient055   | Patient206   |
| 10499 | Patient081A2 | Patient194   |
| 10499 | Patient081D  | Patient194   |
| 10499 | Patient141B  | Patient202   |

|       |              |              |
|-------|--------------|--------------|
| 10499 | Patient196A  | Patient202   |
| 10499 | Patient202   | Patient247E  |
| 10500 | Patient072   | Patient192E  |
| 10500 | Patient099D  | Patient202   |
| 10500 | Patient141C  | Patient202   |
| 10500 | Patient202   | Patient230B  |
| 10500 | Patient202   | Patient230E  |
| 10500 | Patient202   | Patient247A  |
| 10501 | Patient007B  | Patient079B  |
| 10501 | Patient033   | Patient053A1 |
| 10501 | Patient149B  | Patient202   |
| 10501 | Patient202   | Patient263B  |
| 10502 | Patient081C  | Patient194   |
| 10502 | Patient173B  | Patient202   |
| 10502 | Patient201E  | Patient202   |
| 10503 | Patient091A  | Patient258E  |
| 10503 | Patient194   | Patient235A  |
| 10503 | Patient196B  | Patient202   |
| 10503 | Patient196C  | Patient202   |
| 10503 | Patient201A  | Patient202   |
| 10504 | Patient053C  | Patient194   |
| 10504 | Patient072   | Patient192F  |
| 10504 | Patient141G  | Patient194   |
| 10504 | Patient184   | Patient202   |
| 10504 | Patient202   | Patient247B  |
| 10504 | Patient202   | Patient247C  |
| 10505 | Patient055   | Patient164   |
| 10505 | Patient081A1 | Patient194   |
| 10505 | Patient091A  | Patient167   |
| 10505 | Patient121B  | Patient194   |
| 10505 | Patient196E  | Patient202   |
| 10506 | Patient053A2 | Patient194   |
| 10506 | Patient053B  | Patient194   |
| 10506 | Patient055   | Patient141G  |
| 10506 | Patient055   | Patient230C  |
| 10507 | Patient013   | Patient032D  |
| 10508 | Patient202   | Patient230F  |
| 10510 | Patient196D  | Patient202   |
| 10511 | Patient007A  | Patient090   |
| 10513 | Patient032A  | Patient194   |
| 10513 | Patient032B  | Patient194   |
| 10514 | Patient007A  | Patient207   |
| 10514 | Patient022B  | Patient055   |
| 10514 | Patient032E  | Patient194   |
| 10514 | Patient055   | Patient230G  |
| 10514 | Patient194   | Patient220B  |
| 10515 | Patient026F  | Patient202   |
| 10516 | Patient007B  | Patient090   |
| 10517 | Patient032C  | Patient194   |
| 10518 | Patient007A  | Patient133   |

|       |             |              |
|-------|-------------|--------------|
| 10518 | Patient055  | Patient141F  |
| 10518 | Patient167  | Patient194   |
| 10518 | Patient173B | Patient194   |
| 10519 | Patient013  | Patient220B  |
| 10519 | Patient026B | Patient202   |
| 10520 | Patient034A | Patient194   |
| 10520 | Patient202  | Patient246B  |
| 10521 | Patient007B | Patient207   |
| 10521 | Patient034C | Patient194   |
| 10521 | Patient194  | Patient261A  |
| 10522 | Patient007A | Patient053A1 |
| 10522 | Patient034D | Patient194   |
| 10522 | Patient034E | Patient194   |
| 10522 | Patient055  | Patient167   |
| 10522 | Patient176  | Patient194   |
| 10522 | Patient202  | Patient246C  |
| 10523 | Patient032E | Patient055   |
| 10523 | Patient055  | Patient081C  |
| 10523 | Patient055  | Patient261G  |
| 10523 | Patient145B | Patient194   |
| 10523 | Patient150A | Patient194   |
| 10524 | Patient007A | Patient086C  |
| 10524 | Patient007B | Patient133   |
| 10525 | Patient026A | Patient202   |
| 10525 | Patient055  | Patient217A  |
| 10526 | Patient026C | Patient091A  |
| 10526 | Patient103D | Patient202   |
| 10526 | Patient141D | Patient194   |
| 10526 | Patient202  | Patient246E  |
| 10527 | Patient034B | Patient194   |
| 10527 | Patient066D | Patient194   |
| 10527 | Patient091A | Patient220B  |
| 10527 | Patient141A | Patient194   |
| 10527 | Patient150C | Patient194   |
| 10527 | Patient194  | Patient230A  |
| 10527 | Patient194  | Patient261E  |
| 10528 | Patient055  | Patient217C  |
| 10528 | Patient055  | Patient217I  |
| 10528 | Patient091A | Patient092C  |
| 10528 | Patient194  | Patient261G  |
| 10529 | Patient055  | Patient081D  |
| 10529 | Patient055  | Patient145B  |
| 10529 | Patient055  | Patient217B  |
| 10529 | Patient055  | Patient217D  |
| 10529 | Patient055  | Patient217H  |
| 10529 | Patient091A | Patient176   |
| 10529 | Patient091A | Patient217A  |
| 10529 | Patient091A | Patient217H  |
| 10529 | Patient161B | Patient194   |
| 10529 | Patient194  | Patient230C  |

|       |             |              |
|-------|-------------|--------------|
| 10529 | Patient202  | Patient235C  |
| 10530 | Patient007B | Patient053A1 |
| 10530 | Patient055  | Patient217F  |
| 10530 | Patient055  | Patient261E  |
| 10530 | Patient091A | Patient217B  |
| 10530 | Patient091A | Patient217C  |
| 10530 | Patient091A | Patient217D  |
| 10530 | Patient091A | Patient217E  |
| 10530 | Patient091A | Patient217I  |
| 10530 | Patient141F | Patient194   |
| 10530 | Patient145C | Patient194   |
| 10531 | Patient032C | Patient055   |
| 10531 | Patient055  | Patient192D  |
| 10531 | Patient055  | Patient217E  |
| 10531 | Patient055  | Patient261A  |
| 10531 | Patient103E | Patient202   |
| 10531 | Patient126C | Patient202   |
| 10531 | Patient141B | Patient194   |
| 10531 | Patient194  | Patient261B  |
| 10531 | Patient202  | Patient235B  |
| 10532 | Patient007A | Patient086A  |
| 10532 | Patient007B | Patient086C  |
| 10532 | Patient091A | Patient217F  |
| 10532 | Patient141C | Patient194   |
| 10532 | Patient194  | Patient261C  |
| 10532 | Patient202  | Patient224B  |
| 10532 | Patient202  | Patient246D  |
| 10533 | Patient007A | Patient086B  |
| 10533 | Patient007A | Patient086E  |
| 10533 | Patient066F | Patient194   |
| 10533 | Patient194  | Patient261D  |
| 10534 | Patient066E | Patient194   |
| 10535 | Patient055  | Patient217J  |
| 10535 | Patient150B | Patient194   |
| 10535 | Patient194  | Patient230G  |
| 10536 | Patient055  | Patient121B  |
| 10537 | Patient055  | Patient261B  |
| 10537 | Patient123A | Patient194   |
| 10537 | Patient181A | Patient202   |
| 10538 | Patient007A | Patient023   |
| 10538 | Patient055  | Patient261C  |
| 10539 | Patient055  | Patient230D  |
| 10540 | Patient007B | Patient086B  |
| 10540 | Patient026D | Patient055   |
| 10540 | Patient026D | Patient194   |
| 10540 | Patient091A | Patient217J  |
| 10541 | Patient007B | Patient086A  |
| 10541 | Patient007B | Patient086E  |
| 10541 | Patient022B | Patient091A  |
| 10541 | Patient055  | Patient121A  |

|       |              |              |
|-------|--------------|--------------|
| 10541 | Patient173A  | Patient202   |
| 10541 | Patient181B  | Patient202   |
| 10541 | Patient194   | Patient230E  |
| 10542 | Patient007A  | Patient167   |
| 10542 | Patient123C  | Patient194   |
| 10542 | Patient126C  | Patient194   |
| 10542 | Patient145A  | Patient194   |
| 10543 | Patient055   | Patient092D  |
| 10543 | Patient123B  | Patient194   |
| 10544 | Patient007A  | Patient251   |
| 10544 | Patient007B  | Patient023   |
| 10544 | Patient026C  | Patient055   |
| 10544 | Patient055   | Patient261D  |
| 10545 | Patient013   | Patient176   |
| 10545 | Patient194   | Patient230D  |
| 10545 | Patient194   | Patient230F  |
| 10546 | Patient026E  | Patient055   |
| 10546 | Patient123D  | Patient194   |
| 10547 | Patient007A  | Patient092C  |
| 10547 | Patient026E  | Patient194   |
| 10547 | Patient026F  | Patient194   |
| 10547 | Patient045A  | Patient194   |
| 10547 | Patient055   | Patient161B  |
| 10547 | Patient194   | Patient230B  |
| 10549 | Patient007B  | Patient167   |
| 10549 | Patient055   | Patient081B  |
| 10550 | Patient045B  | Patient194   |
| 10550 | Patient055   | Patient081E  |
| 10551 | Patient026A  | Patient194   |
| 10551 | Patient026B  | Patient194   |
| 10551 | Patient081B  | Patient091A  |
| 10551 | Patient081E  | Patient091A  |
| 10552 | Patient007B  | Patient092C  |
| 10552 | Patient007B  | Patient251   |
| 10552 | Patient045C  | Patient194   |
| 10552 | Patient055   | Patient230E  |
| 10552 | Patient183A  | Patient194   |
| 10553 | Patient013   | Patient177   |
| 10553 | Patient033   | Patient207   |
| 10553 | Patient055   | Patient081F  |
| 10554 | Patient055   | Patient081A2 |
| 10554 | Patient092C  | Patient128   |
| 10555 | Patient055   | Patient241   |
| 10555 | Patient081F  | Patient091A  |
| 10556 | Patient055   | Patient230F  |
| 10556 | Patient091A  | Patient092D  |
| 10556 | Patient091A  | Patient141G  |
| 10557 | Patient022B  | Patient194   |
| 10557 | Patient055   | Patient081A1 |
| 10557 | Patient081A2 | Patient091A  |

|       |              |             |
|-------|--------------|-------------|
| 10557 | Patient081C  | Patient091A |
| 10557 | Patient183D  | Patient194  |
| 10558 | Patient081D  | Patient091A |
| 10559 | Patient055   | Patient173B |
| 10559 | Patient173A  | Patient194  |
| 10560 | Patient033   | Patient206  |
| 10560 | Patient081A1 | Patient091A |
| 10561 | Patient055   | Patient145C |
| 10563 | Patient055   | Patient141A |
| 10564 | Patient055   | Patient141D |
| 10564 | Patient055   | Patient230A |
| 10565 | Patient013   | Patient022B |
| 10565 | Patient183B  | Patient194  |
| 10567 | Patient055   | Patient066D |
| 10567 | Patient055   | Patient141B |
| 10567 | Patient055   | Patient141C |
| 10568 | Patient013   | Patient213A |
| 10568 | Patient033   | Patient242  |
| 10568 | Patient053B  | Patient055  |
| 10568 | Patient053C  | Patient055  |
| 10568 | Patient055   | Patient066E |
| 10568 | Patient183C  | Patient194  |
| 10568 | Patient183E  | Patient194  |
| 10569 | Patient032B  | Patient055  |
| 10569 | Patient055   | Patient066F |
| 10569 | Patient126A  | Patient202  |
| 10570 | Patient032A  | Patient055  |
| 10570 | Patient055   | Patient150A |
| 10571 | Patient053A2 | Patient055  |
| 10572 | Patient033   | Patient092C |
| 10572 | Patient074A  | Patient194  |
| 10572 | Patient074B  | Patient194  |
| 10572 | Patient074D  | Patient194  |
| 10572 | Patient202   | Patient252A |
| 10572 | Patient202   | Patient252B |
| 10573 | Patient034A  | Patient055  |
| 10573 | Patient120A  | Patient194  |
| 10574 | Patient032A  | Patient091A |
| 10574 | Patient055   | Patient150B |
| 10575 | Patient032B  | Patient091A |
| 10575 | Patient055   | Patient145A |
| 10575 | Patient055   | Patient150C |
| 10575 | Patient074C  | Patient194  |
| 10575 | Patient091A  | Patient141A |
| 10575 | Patient091A  | Patient141B |
| 10575 | Patient091A  | Patient141C |
| 10575 | Patient194   | Patient224A |
| 10576 | Patient032E  | Patient091A |
| 10576 | Patient181B  | Patient194  |
| 10577 | Patient126A  | Patient194  |

|       |              |             |
|-------|--------------|-------------|
| 10578 | Patient034E  | Patient055  |
| 10579 | Patient032C  | Patient091A |
| 10579 | Patient034D  | Patient055  |
| 10579 | Patient055   | Patient230B |
| 10579 | Patient091A  | Patient141D |
| 10579 | Patient092G  | Patient194  |
| 10579 | Patient097A  | Patient202  |
| 10579 | Patient181A  | Patient194  |
| 10579 | Patient202   | Patient252F |
| 10580 | Patient034A  | Patient091A |
| 10580 | Patient091A  | Patient235A |
| 10580 | Patient092H  | Patient194  |
| 10580 | Patient192A  | Patient194  |
| 10580 | Patient194   | Patient224B |
| 10581 | Patient034C  | Patient055  |
| 10581 | Patient034E  | Patient091A |
| 10581 | Patient091A  | Patient141F |
| 10581 | Patient091A  | Patient261G |
| 10581 | Patient177   | Patient194  |
| 10582 | Patient033   | Patient241  |
| 10582 | Patient034B  | Patient055  |
| 10582 | Patient055   | Patient242  |
| 10582 | Patient091A  | Patient145B |
| 10582 | Patient091A  | Patient230C |
| 10582 | Patient097D  | Patient202  |
| 10582 | Patient192B  | Patient194  |
| 10583 | Patient034C  | Patient091A |
| 10583 | Patient034D  | Patient091A |
| 10583 | Patient091A  | Patient261A |
| 10583 | Patient192C  | Patient194  |
| 10584 | Patient013   | Patient092C |
| 10584 | Patient045A  | Patient055  |
| 10584 | Patient074E  | Patient194  |
| 10585 | Patient091A  | Patient161B |
| 10585 | Patient091A  | Patient230A |
| 10585 | Patient091A  | Patient261E |
| 10585 | Patient097B  | Patient202  |
| 10586 | Patient055   | Patient183D |
| 10586 | Patient120B  | Patient202  |
| 10587 | Patient034B  | Patient091A |
| 10587 | Patient097E  | Patient202  |
| 10588 | Patient007A  | Patient092D |
| 10588 | Patient079A2 | Patient202  |
| 10588 | Patient091A  | Patient261C |
| 10588 | Patient120D  | Patient202  |
| 10589 | Patient045B  | Patient055  |
| 10589 | Patient091A  | Patient145C |
| 10589 | Patient091A  | Patient230G |
| 10589 | Patient092A  | Patient194  |
| 10589 | Patient103C  | Patient202  |



|       |              |             |
|-------|--------------|-------------|
| 10590 | Patient045C  | Patient055  |
| 10590 | Patient079C  | Patient202  |
| 10590 | Patient092E  | Patient194  |
| 10590 | Patient097C  | Patient202  |
| 10590 | Patient103B  | Patient202  |
| 10590 | Patient192E  | Patient194  |
| 10590 | Patient202   | Patient224A |
| 10591 | Patient007A  | Patient141G |
| 10591 | Patient079A1 | Patient202  |
| 10591 | Patient091A  | Patient261B |
| 10591 | Patient120C  | Patient202  |
| 10592 | Patient103A  | Patient194  |
| 10592 | Patient103B  | Patient194  |
| 10593 | Patient007B  | Patient092D |
| 10593 | Patient055   | Patient123A |
| 10593 | Patient055   | Patient183B |
| 10594 | Patient055   | Patient123C |
| 10594 | Patient092B  | Patient194  |
| 10594 | Patient103C  | Patient194  |
| 10594 | Patient108D  | Patient202  |
| 10595 | Patient055   | Patient183C |
| 10595 | Patient066D  | Patient091A |
| 10595 | Patient091A  | Patient261D |
| 10596 | Patient091A  | Patient121A |
| 10597 | Patient007B  | Patient141G |
| 10598 | Patient007A  | Patient261G |
| 10598 | Patient055   | Patient183E |
| 10598 | Patient108A  | Patient202  |
| 10599 | Patient007A  | Patient206  |
| 10599 | Patient007A  | Patient230C |
| 10599 | Patient055   | Patient123B |
| 10599 | Patient079B  | Patient202  |
| 10600 | Patient007A  | Patient032E |
| 10600 | Patient007A  | Patient141F |
| 10600 | Patient055   | Patient123D |
| 10600 | Patient091A  | Patient145A |
| 10600 | Patient091A  | Patient173B |
| 10601 | Patient007A  | Patient032C |
| 10601 | Patient007A  | Patient230G |
| 10601 | Patient066E  | Patient091A |
| 10601 | Patient192F  | Patient194  |
| 10602 | Patient055   | Patient183A |
| 10602 | Patient066F  | Patient091A |
| 10602 | Patient109E  | Patient202  |
| 10603 | Patient007B  | Patient230C |
| 10603 | Patient091A  | Patient121B |
| 10603 | Patient194   | Patient213A |
| 10604 | Patient007B  | Patient261G |
| 10604 | Patient091A  | Patient230D |
| 10604 | Patient091A  | Patient230E |

|       |              |              |
|-------|--------------|--------------|
| 10604 | Patient108G  | Patient202   |
| 10604 | Patient109A  | Patient202   |
| 10604 | Patient109C  | Patient202   |
| 10604 | Patient109D  | Patient202   |
| 10605 | Patient007B  | Patient206   |
| 10605 | Patient026F  | Patient055   |
| 10605 | Patient092D  | Patient128   |
| 10605 | Patient109B  | Patient202   |
| 10606 | Patient007B  | Patient032C  |
| 10606 | Patient007B  | Patient032E  |
| 10606 | Patient007B  | Patient141F  |
| 10606 | Patient091A  | Patient230B  |
| 10607 | Patient007A  | Patient145B  |
| 10607 | Patient007B  | Patient230G  |
| 10607 | Patient022B  | Patient033   |
| 10607 | Patient033   | Patient176   |
| 10607 | Patient091A  | Patient230F  |
| 10607 | Patient108H  | Patient202   |
| 10608 | Patient091A  | Patient126C  |
| 10608 | Patient108F  | Patient202   |
| 10609 | Patient026B  | Patient055   |
| 10609 | Patient194   | Patient235E  |
| 10610 | Patient007A  | Patient176   |
| 10610 | Patient033   | Patient092D  |
| 10610 | Patient194   | Patient235F  |
| 10612 | Patient055   | Patient235A  |
| 10613 | Patient007B  | Patient145B  |
| 10613 | Patient026A  | Patient055   |
| 10613 | Patient055   | Patient220B  |
| 10615 | Patient007B  | Patient176   |
| 10616 | Patient033   | Patient133   |
| 10616 | Patient091A  | Patient092G  |
| 10616 | Patient091A  | Patient150A  |
| 10616 | Patient194   | Patient235C  |
| 10617 | Patient033   | Patient141G  |
| 10617 | Patient033   | Patient258A1 |
| 10617 | Patient194   | Patient235B  |
| 10618 | Patient033   | Patient258D  |
| 10618 | Patient053C  | Patient091A  |
| 10618 | Patient091A  | Patient150C  |
| 10619 | Patient007A  | Patient141D  |
| 10619 | Patient033   | Patient258B  |
| 10619 | Patient033   | Patient258F  |
| 10620 | Patient026D  | Patient091A  |
| 10621 | Patient007A  | Patient032A  |
| 10621 | Patient033   | Patient090   |
| 10621 | Patient033   | Patient258G  |
| 10621 | Patient053A2 | Patient091A  |
| 10621 | Patient053B  | Patient091A  |
| 10621 | Patient055   | Patient126C  |

|       |             |              |
|-------|-------------|--------------|
| 10621 | Patient086C | Patient128   |
| 10622 | Patient033  | Patient258A2 |
| 10623 | Patient007A | Patient261E  |
| 10623 | Patient013  | Patient081E  |
| 10623 | Patient033  | Patient230C  |
| 10624 | Patient007B | Patient141D  |
| 10626 | Patient007A | Patient032B  |
| 10626 | Patient026E | Patient091A  |
| 10627 | Patient007B | Patient032A  |
| 10627 | Patient032E | Patient033   |
| 10628 | Patient007A | Patient261C  |
| 10628 | Patient013  | Patient081F  |
| 10628 | Patient032C | Patient033   |
| 10628 | Patient091A | Patient150B  |
| 10629 | Patient007A | Patient034A  |
| 10629 | Patient007B | Patient261E  |
| 10629 | Patient013  | Patient081B  |
| 10629 | Patient055  | Patient181B  |
| 10629 | Patient128  | Patient133   |
| 10629 | Patient195  | Patient202   |
| 10630 | Patient007B | Patient032B  |
| 10630 | Patient032A | Patient033   |
| 10630 | Patient086A | Patient128   |
| 10630 | Patient086E | Patient128   |
| 10630 | Patient091A | Patient183A  |
| 10631 | Patient007A | Patient034B  |
| 10631 | Patient007A | Patient034C  |
| 10631 | Patient007A | Patient034E  |
| 10631 | Patient013  | Patient081A2 |
| 10631 | Patient032B | Patient033   |
| 10631 | Patient055  | Patient173A  |
| 10631 | Patient128  | Patient241   |
| 10632 | Patient007A | Patient034D  |
| 10632 | Patient013  | Patient081A1 |
| 10632 | Patient033  | Patient167   |
| 10632 | Patient033  | Patient230G  |
| 10632 | Patient033  | Patient258E  |
| 10632 | Patient055  | Patient192A  |
| 10633 | Patient007A | Patient092G  |
| 10633 | Patient033  | Patient145B  |
| 10633 | Patient055  | Patient181A  |
| 10633 | Patient086B | Patient128   |
| 10634 | Patient007B | Patient034A  |
| 10634 | Patient007B | Patient261C  |
| 10634 | Patient055  | Patient192B  |
| 10634 | Patient055  | Patient192C  |
| 10635 | Patient033  | Patient141F  |
| 10635 | Patient121A | Patient128   |
| 10636 | Patient007B | Patient034B  |
| 10636 | Patient007B | Patient034C  |

|       |              |              |
|-------|--------------|--------------|
| 10636 | Patient007B  | Patient034E  |
| 10636 | Patient091A  | Patient183D  |
| 10637 | Patient007A  | Patient145C  |
| 10637 | Patient007B  | Patient034D  |
| 10637 | Patient033   | Patient034A  |
| 10637 | Patient033   | Patient034B  |
| 10637 | Patient033   | Patient141D  |
| 10638 | Patient033   | Patient034E  |
| 10638 | Patient033   | Patient261G  |
| 10638 | Patient081A2 | Patient128   |
| 10639 | Patient007B  | Patient092G  |
| 10640 | Patient081A1 | Patient128   |
| 10640 | Patient081B  | Patient128   |
| 10640 | Patient081C  | Patient128   |
| 10640 | Patient091A  | Patient120A  |
| 10641 | Patient007A  | Patient261A  |
| 10641 | Patient033   | Patient034C  |
| 10641 | Patient081E  | Patient128   |
| 10641 | Patient121B  | Patient128   |
| 10642 | Patient033   | Patient034D  |
| 10642 | Patient091A  | Patient123A  |
| 10643 | Patient007B  | Patient145C  |
| 10643 | Patient013   | Patient092D  |
| 10643 | Patient081D  | Patient128   |
| 10643 | Patient081F  | Patient128   |
| 10643 | Patient091A  | Patient183B  |
| 10644 | Patient007A  | Patient053B  |
| 10644 | Patient007A  | Patient053C  |
| 10644 | Patient026F  | Patient091A  |
| 10644 | Patient194   | Patient195   |
| 10645 | Patient033   | Patient145C  |
| 10646 | Patient007A  | Patient053A2 |
| 10646 | Patient026B  | Patient091A  |
| 10646 | Patient055   | Patient092H  |
| 10646 | Patient055   | Patient213A  |
| 10646 | Patient091A  | Patient183C  |
| 10646 | Patient128   | Patient164   |
| 10647 | Patient007A  | Patient145A  |
| 10647 | Patient007B  | Patient261A  |
| 10647 | Patient026A  | Patient091A  |
| 10647 | Patient055   | Patient192F  |
| 10647 | Patient091A  | Patient183E  |
| 10648 | Patient007A  | Patient261B  |
| 10648 | Patient013   | Patient053A1 |
| 10648 | Patient033   | Patient261E  |
| 10648 | Patient055   | Patient192E  |
| 10648 | Patient091A  | Patient123B  |
| 10648 | Patient091A  | Patient123C  |
| 10649 | Patient055   | Patient092G  |
| 10649 | Patient055   | Patient177   |

|       |             |              |
|-------|-------------|--------------|
| 10649 | Patient091A | Patient123D  |
| 10650 | Patient007B | Patient053B  |
| 10650 | Patient007B | Patient053C  |
| 10650 | Patient103D | Patient194   |
| 10651 | Patient007A | Patient261D  |
| 10652 | Patient007B | Patient053A2 |
| 10653 | Patient007A | Patient183A  |
| 10653 | Patient007B | Patient145A  |
| 10653 | Patient033  | Patient217A  |
| 10653 | Patient033  | Patient261C  |
| 10654 | Patient007B | Patient183A  |
| 10654 | Patient007B | Patient261B  |
| 10654 | Patient013  | Patient145C  |
| 10654 | Patient032A | Patient128   |
| 10654 | Patient032B | Patient128   |
| 10654 | Patient055  | Patient092A  |
| 10654 | Patient103E | Patient194   |
| 10656 | Patient033  | Patient217B  |
| 10656 | Patient033  | Patient217D  |
| 10656 | Patient033  | Patient217F  |
| 10656 | Patient033  | Patient217H  |
| 10656 | Patient033  | Patient217I  |
| 10656 | Patient091A | Patient224A  |
| 10656 | Patient128  | Patient230C  |
| 10657 | Patient007B | Patient261D  |
| 10657 | Patient013  | Patient141C  |
| 10657 | Patient033  | Patient217C  |
| 10657 | Patient055  | Patient092E  |
| 10658 | Patient032C | Patient128   |
| 10658 | Patient033  | Patient053C  |
| 10658 | Patient033  | Patient217E  |
| 10658 | Patient128  | Patient141A  |
| 10659 | Patient007A | Patient121B  |
| 10659 | Patient013  | Patient141A  |
| 10659 | Patient032E | Patient128   |
| 10659 | Patient033  | Patient261A  |
| 10659 | Patient055  | Patient092B  |
| 10659 | Patient091A | Patient181B  |
| 10659 | Patient128  | Patient261G  |
| 10660 | Patient013  | Patient121A  |
| 10660 | Patient013  | Patient126C  |
| 10660 | Patient013  | Patient141B  |
| 10660 | Patient013  | Patient258E  |
| 10660 | Patient026C | Patient033   |
| 10660 | Patient045A | Patient091A  |
| 10660 | Patient128  | Patient141C  |
| 10660 | Patient128  | Patient150A  |
| 10660 | Patient128  | Patient230A  |
| 10661 | Patient007A | Patient121A  |
| 10661 | Patient007A | Patient183D  |

|       |              |              |
|-------|--------------|--------------|
| 10661 | Patient013   | Patient032A  |
| 10661 | Patient013   | Patient123A  |
| 10661 | Patient013   | Patient141D  |
| 10661 | Patient033   | Patient145A  |
| 10661 | Patient034A  | Patient128   |
| 10661 | Patient091A  | Patient181A  |
| 10661 | Patient091A  | Patient195   |
| 10661 | Patient128   | Patient141B  |
| 10662 | Patient033   | Patient053A2 |
| 10662 | Patient033   | Patient053B  |
| 10662 | Patient055   | Patient224A  |
| 10662 | Patient055   | Patient224B  |
| 10662 | Patient128   | Patient141D  |
| 10662 | Patient128   | Patient150C  |
| 10662 | Patient128   | Patient230G  |
| 10663 | Patient013   | Patient032B  |
| 10663 | Patient013   | Patient123B  |
| 10663 | Patient045B  | Patient091A  |
| 10664 | Patient045C  | Patient091A  |
| 10664 | Patient128   | Patient145B  |
| 10665 | Patient013   | Patient123C  |
| 10665 | Patient033   | Patient217J  |
| 10665 | Patient033   | Patient261B  |
| 10665 | Patient034E  | Patient128   |
| 10665 | Patient053A1 | Patient128   |
| 10665 | Patient128   | Patient145C  |
| 10666 | Patient007B  | Patient121B  |
| 10666 | Patient013   | Patient145A  |
| 10666 | Patient034B  | Patient128   |
| 10666 | Patient034D  | Patient128   |
| 10666 | Patient055   | Patient235E  |
| 10666 | Patient074B  | Patient091A  |
| 10666 | Patient091A  | Patient224B  |
| 10666 | Patient128   | Patient261A  |
| 10667 | Patient055   | Patient074B  |
| 10667 | Patient128   | Patient141F  |
| 10668 | Patient007B  | Patient121A  |
| 10668 | Patient007B  | Patient183D  |
| 10668 | Patient013   | Patient034A  |
| 10668 | Patient013   | Patient121B  |
| 10668 | Patient053C  | Patient128   |
| 10668 | Patient055   | Patient074A  |
| 10668 | Patient128   | Patient150B  |
| 10668 | Patient128   | Patient242   |
| 10669 | Patient007A  | Patient183C  |
| 10669 | Patient013   | Patient123D  |
| 10669 | Patient034C  | Patient128   |
| 10669 | Patient055   | Patient074C  |
| 10669 | Patient066D  | Patient128   |
| 10669 | Patient074A  | Patient091A  |

|       |              |              |
|-------|--------------|--------------|
| 10669 | Patient074D  | Patient091A  |
| 10669 | Patient128   | Patient167   |
| 10670 | Patient033   | Patient261D  |
| 10670 | Patient053A2 | Patient128   |
| 10670 | Patient055   | Patient235F  |
| 10670 | Patient128   | Patient217A  |
| 10670 | Patient128   | Patient261B  |
| 10671 | Patient007A  | Patient183B  |
| 10671 | Patient013   | Patient034E  |
| 10671 | Patient053B  | Patient128   |
| 10671 | Patient074C  | Patient091A  |
| 10671 | Patient091A  | Patient126A  |
| 10671 | Patient091A  | Patient173A  |
| 10672 | Patient007A  | Patient183E  |
| 10672 | Patient013   | Patient034D  |
| 10672 | Patient013   | Patient230A  |
| 10672 | Patient128   | Patient217C  |
| 10672 | Patient128   | Patient217F  |
| 10672 | Patient128   | Patient230E  |
| 10672 | Patient128   | Patient261D  |
| 10672 | Patient128   | Patient261E  |
| 10673 | Patient007A  | Patient123A  |
| 10673 | Patient013   | Patient053A2 |
| 10673 | Patient033   | Patient103A  |
| 10673 | Patient091A  | Patient103C  |
| 10673 | Patient128   | Patient141G  |
| 10673 | Patient128   | Patient217D  |
| 10673 | Patient128   | Patient217I  |
| 10673 | Patient128   | Patient230B  |
| 10673 | Patient128   | Patient230F  |
| 10674 | Patient013   | Patient034C  |
| 10674 | Patient013   | Patient053B  |
| 10674 | Patient091A  | Patient103B  |
| 10674 | Patient128   | Patient217B  |
| 10674 | Patient128   | Patient217H  |
| 10674 | Patient128   | Patient230D  |
| 10674 | Patient128   | Patient261C  |
| 10675 | Patient013   | Patient053C  |
| 10675 | Patient055   | Patient074D  |
| 10675 | Patient066F  | Patient128   |
| 10675 | Patient123A  | Patient128   |
| 10675 | Patient128   | Patient217E  |
| 10676 | Patient013   | Patient034B  |
| 10676 | Patient013   | Patient230E  |
| 10676 | Patient033   | Patient081E  |
| 10676 | Patient055   | Patient103B  |
| 10676 | Patient066E  | Patient128   |
| 10677 | Patient007B  | Patient183C  |
| 10677 | Patient128   | Patient145A  |
| 10678 | Patient007A  | Patient123B  |

|       |             |              |
|-------|-------------|--------------|
| 10678 | Patient007A | Patient123C  |
| 10678 | Patient007B | Patient183B  |
| 10678 | Patient033  | Patient081B  |
| 10678 | Patient055  | Patient074E  |
| 10678 | Patient055  | Patient103C  |
| 10678 | Patient128  | Patient258E  |
| 10679 | Patient007A | Patient022B  |
| 10679 | Patient007B | Patient123A  |
| 10679 | Patient007B | Patient183E  |
| 10679 | Patient033  | Patient123A  |
| 10679 | Patient055  | Patient103A  |
| 10679 | Patient055  | Patient235C  |
| 10679 | Patient120C | Patient194   |
| 10679 | Patient128  | Patient258D  |
| 10679 | Patient128  | Patient258F  |
| 10680 | Patient007A | Patient123D  |
| 10680 | Patient013  | Patient066F  |
| 10680 | Patient128  | Patient161B  |
| 10680 | Patient128  | Patient217J  |
| 10680 | Patient128  | Patient258A1 |
| 10680 | Patient128  | Patient258B  |
| 10681 | Patient013  | Patient066D  |
| 10681 | Patient013  | Patient173B  |
| 10681 | Patient013  | Patient217A  |
| 10681 | Patient013  | Patient230F  |
| 10681 | Patient033  | Patient081A2 |
| 10681 | Patient055  | Patient235B  |
| 10681 | Patient123C | Patient128   |
| 10681 | Patient128  | Patient258G  |
| 10682 | Patient074E | Patient091A  |
| 10682 | Patient091A | Patient103A  |
| 10682 | Patient120B | Patient194   |
| 10682 | Patient120D | Patient194   |
| 10682 | Patient128  | Patient173B  |
| 10682 | Patient128  | Patient258A2 |
| 10683 | Patient013  | Patient217B  |
| 10683 | Patient013  | Patient217C  |
| 10683 | Patient013  | Patient217E  |
| 10683 | Patient013  | Patient217F  |
| 10683 | Patient033  | Patient081A1 |
| 10683 | Patient033  | Patient081C  |
| 10683 | Patient033  | Patient081F  |
| 10683 | Patient055  | Patient126A  |
| 10683 | Patient091A | Patient092H  |
| 10683 | Patient123B | Patient128   |
| 10683 | Patient123D | Patient128   |
| 10684 | Patient007B | Patient022B  |
| 10684 | Patient007B | Patient123B  |
| 10684 | Patient007B | Patient123C  |
| 10684 | Patient013  | Patient217D  |



|       |             |             |
|-------|-------------|-------------|
| 10684 | Patient013  | Patient230B |
| 10684 | Patient026C | Patient128  |
| 10684 | Patient026F | Patient128  |
| 10684 | Patient033  | Patient081D |
| 10684 | Patient033  | Patient123C |
| 10684 | Patient033  | Patient123D |
| 10684 | Patient033  | Patient192D |
| 10684 | Patient055  | Patient120A |
| 10685 | Patient013  | Patient066E |
| 10685 | Patient013  | Patient217H |
| 10685 | Patient013  | Patient217I |
| 10685 | Patient026D | Patient128  |
| 10686 | Patient007B | Patient123D |
| 10686 | Patient013  | Patient235A |
| 10686 | Patient026A | Patient128  |
| 10686 | Patient091A | Patient192A |
| 10687 | Patient026B | Patient128  |
| 10687 | Patient033  | Patient123B |
| 10688 | Patient013  | Patient261A |
| 10688 | Patient026E | Patient128  |
| 10689 | Patient091A | Patient092A |
| 10689 | Patient091A | Patient192B |
| 10690 | Patient013  | Patient026B |
| 10690 | Patient045A | Patient128  |
| 10690 | Patient091A | Patient192C |
| 10690 | Patient126C | Patient128  |
| 10691 | Patient033  | Patient177  |
| 10691 | Patient033  | Patient183A |
| 10692 | Patient013  | Patient217J |
| 10692 | Patient091A | Patient092E |
| 10693 | Patient013  | Patient026A |
| 10693 | Patient013  | Patient026C |
| 10693 | Patient013  | Patient026F |
| 10693 | Patient013  | Patient261B |
| 10693 | Patient090  | Patient128  |
| 10693 | Patient091A | Patient092B |
| 10695 | Patient033  | Patient120A |
| 10695 | Patient045C | Patient128  |
| 10696 | Patient045B | Patient128  |
| 10696 | Patient128  | Patient183A |
| 10697 | Patient007A | Patient092H |
| 10697 | Patient091A | Patient192E |
| 10699 | Patient007A | Patient092E |
| 10700 | Patient007A | Patient092A |
| 10700 | Patient033  | Patient183D |
| 10701 | Patient013  | Patient261D |
| 10701 | Patient033  | Patient235E |
| 10702 | Patient033  | Patient195  |
| 10702 | Patient033  | Patient230A |
| 10703 | Patient007B | Patient092H |

|       |             |             |
|-------|-------------|-------------|
| 10703 | Patient033  | Patient141A |
| 10704 | Patient013  | Patient192D |
| 10704 | Patient033  | Patient235F |
| 10704 | Patient128  | Patient183D |
| 10705 | Patient007B | Patient092E |
| 10705 | Patient033  | Patient141B |
| 10705 | Patient033  | Patient183B |
| 10706 | Patient007B | Patient092A |
| 10706 | Patient091A | Patient192F |
| 10706 | Patient092H | Patient128  |
| 10706 | Patient128  | Patient183B |
| 10706 | Patient128  | Patient183C |
| 10706 | Patient128  | Patient183E |
| 10707 | Patient007A | Patient092B |
| 10707 | Patient033  | Patient141C |
| 10707 | Patient033  | Patient183C |
| 10709 | Patient013  | Patient235E |
| 10709 | Patient092G | Patient128  |
| 10710 | Patient013  | Patient235F |
| 10711 | Patient013  | Patient235B |
| 10711 | Patient055  | Patient195  |
| 10711 | Patient074A | Patient202  |
| 10711 | Patient074B | Patient202  |
| 10711 | Patient092A | Patient128  |
| 10711 | Patient092E | Patient128  |
| 10712 | Patient007B | Patient092B |
| 10712 | Patient013  | Patient235C |
| 10712 | Patient033  | Patient183E |
| 10713 | Patient007A | Patient177  |
| 10713 | Patient074C | Patient202  |
| 10713 | Patient091A | Patient177  |
| 10713 | Patient128  | Patient192A |
| 10714 | Patient007A | Patient192A |
| 10714 | Patient007A | Patient192C |
| 10714 | Patient033  | Patient066D |
| 10714 | Patient033  | Patient066F |
| 10714 | Patient033  | Patient181B |
| 10714 | Patient128  | Patient192B |
| 10715 | Patient033  | Patient066E |
| 10715 | Patient033  | Patient230E |
| 10715 | Patient091A | Patient235C |
| 10715 | Patient092B | Patient128  |
| 10715 | Patient128  | Patient192C |
| 10716 | Patient007A | Patient192B |
| 10716 | Patient074D | Patient202  |
| 10716 | Patient091A | Patient235E |
| 10716 | Patient128  | Patient176  |
| 10717 | Patient033  | Patient181A |
| 10717 | Patient091A | Patient235B |
| 10717 | Patient091A | Patient235F |

|       |             |             |
|-------|-------------|-------------|
| 10718 | Patient007B | Patient192A |
| 10718 | Patient007B | Patient192C |
| 10718 | Patient033  | Patient224B |
| 10719 | Patient007B | Patient177  |
| 10720 | Patient007B | Patient192B |
| 10720 | Patient033  | Patient103D |
| 10720 | Patient033  | Patient230B |
| 10720 | Patient033  | Patient230F |
| 10722 | Patient055  | Patient103D |
| 10722 | Patient128  | Patient192E |
| 10723 | Patient013  | Patient086C |
| 10723 | Patient033  | Patient103E |
| 10723 | Patient074E | Patient202  |
| 10724 | Patient033  | Patient230D |
| 10724 | Patient033  | Patient235A |
| 10725 | Patient007A | Patient235E |
| 10726 | Patient007A | Patient192E |
| 10726 | Patient055  | Patient103E |
| 10727 | Patient128  | Patient192F |
| 10728 | Patient007A | Patient192F |
| 10728 | Patient007A | Patient235F |
| 10729 | Patient033  | Patient092H |
| 10729 | Patient128  | Patient235A |
| 10730 | Patient033  | Patient092G |
| 10731 | Patient007A | Patient103A |
| 10731 | Patient007B | Patient192E |
| 10731 | Patient007B | Patient192F |
| 10731 | Patient007B | Patient235E |
| 10732 | Patient033  | Patient092E |
| 10732 | Patient091A | Patient213A |
| 10733 | Patient013  | Patient126A |
| 10734 | Patient007B | Patient235F |
| 10734 | Patient128  | Patient207  |
| 10734 | Patient128  | Patient235C |
| 10734 | Patient128  | Patient235E |
| 10735 | Patient033  | Patient092A |
| 10736 | Patient091A | Patient103D |
| 10736 | Patient128  | Patient235B |
| 10736 | Patient128  | Patient235F |
| 10737 | Patient007B | Patient103A |
| 10737 | Patient013  | Patient086A |
| 10738 | Patient013  | Patient086B |
| 10738 | Patient013  | Patient086E |
| 10738 | Patient033  | Patient192A |
| 10739 | Patient033  | Patient092B |
| 10740 | Patient091A | Patient103E |
| 10740 | Patient128  | Patient192D |
| 10741 | Patient033  | Patient192C |
| 10746 | Patient013  | Patient074A |
| 10746 | Patient013  | Patient074B |

|       |              |             |
|-------|--------------|-------------|
| 10748 | Patient013   | Patient074D |
| 10748 | Patient033   | Patient192B |
| 10751 | Patient033   | Patient164  |
| 10752 | Patient013   | Patient074C |
| 10752 | Patient013   | Patient092H |
| 10753 | Patient007A  | Patient164  |
| 10753 | Patient055   | Patient120B |
| 10754 | Patient026D  | Patient033  |
| 10755 | Patient013   | Patient092G |
| 10755 | Patient013   | Patient224B |
| 10756 | Patient013   | Patient224A |
| 10756 | Patient021A2 | Patient202  |
| 10757 | Patient055   | Patient120D |
| 10758 | Patient013   | Patient092E |
| 10758 | Patient013   | Patient173A |
| 10758 | Patient026E  | Patient033  |
| 10758 | Patient033   | Patient192E |
| 10759 | Patient013   | Patient092A |
| 10759 | Patient021A1 | Patient202  |
| 10759 | Patient055   | Patient120C |
| 10760 | Patient007B  | Patient164  |
| 10760 | Patient013   | Patient074E |
| 10760 | Patient013   | Patient103C |
| 10760 | Patient033   | Patient121B |
| 10762 | Patient013   | Patient092B |
| 10764 | Patient013   | Patient103B |
| 10764 | Patient128   | Patient224A |
| 10765 | Patient033   | Patient192F |
| 10766 | Patient128   | Patient224B |
| 10767 | Patient013   | Patient181A |
| 10768 | Patient013   | Patient181B |
| 10768 | Patient026B  | Patient033  |
| 10768 | Patient026F  | Patient033  |
| 10769 | Patient026A  | Patient033  |
| 10769 | Patient033   | Patient074B |
| 10770 | Patient013   | Patient103A |
| 10771 | Patient007A  | Patient081C |
| 10772 | Patient033   | Patient074A |
| 10772 | Patient128   | Patient181A |
| 10773 | Patient128   | Patient181B |
| 10774 | Patient007A  | Patient192D |
| 10775 | Patient033   | Patient074C |
| 10775 | Patient033   | Patient074D |
| 10775 | Patient091A  | Patient120C |
| 10775 | Patient128   | Patient177  |
| 10776 | Patient007A  | Patient081D |
| 10776 | Patient007B  | Patient081C |
| 10776 | Patient091A  | Patient120D |
| 10777 | Patient033   | Patient074E |
| 10777 | Patient091A  | Patient120B |

|       |             |              |
|-------|-------------|--------------|
| 10777 | Patient128  | Patient213A  |
| 10779 | Patient033  | Patient173A  |
| 10781 | Patient007A | Patient103D  |
| 10781 | Patient128  | Patient173A  |
| 10782 | Patient007A | Patient213A  |
| 10782 | Patient007B | Patient081D  |
| 10782 | Patient007B | Patient192D  |
| 10783 | Patient033  | Patient224A  |
| 10783 | Patient103C | Patient128   |
| 10783 | Patient126A | Patient128   |
| 10785 | Patient007A | Patient258A1 |
| 10786 | Patient007A | Patient103E  |
| 10788 | Patient007A | Patient258B  |
| 10788 | Patient007A | Patient258F  |
| 10788 | Patient007A | Patient258G  |
| 10788 | Patient007B | Patient213A  |
| 10789 | Patient007A | Patient258D  |
| 10789 | Patient007B | Patient103D  |
| 10789 | Patient103B | Patient128   |
| 10790 | Patient007A | Patient258A2 |
| 10790 | Patient013  | Patient192A  |
| 10790 | Patient013  | Patient195   |
| 10791 | Patient013  | Patient192B  |
| 10792 | Patient007A | Patient081E  |
| 10792 | Patient007A | Patient081F  |
| 10793 | Patient007B | Patient103E  |
| 10793 | Patient033  | Patient150A  |
| 10793 | Patient033  | Patient150C  |
| 10793 | Patient103A | Patient128   |
| 10794 | Patient007A | Patient081B  |
| 10794 | Patient033  | Patient103C  |
| 10795 | Patient007B | Patient258A1 |
| 10796 | Patient007B | Patient081E  |
| 10797 | Patient007A | Patient081A2 |
| 10797 | Patient007B | Patient258F  |
| 10797 | Patient033  | Patient045A  |
| 10797 | Patient033  | Patient103B  |
| 10797 | Patient033  | Patient126A  |
| 10798 | Patient007B | Patient258B  |
| 10798 | Patient007B | Patient258D  |
| 10798 | Patient007B | Patient258G  |
| 10798 | Patient033  | Patient120B  |
| 10799 | Patient007A | Patient081A1 |
| 10799 | Patient007A | Patient217A  |
| 10799 | Patient007A | Patient242   |
| 10799 | Patient007B | Patient081F  |
| 10799 | Patient013  | Patient192C  |
| 10800 | Patient007B | Patient081B  |
| 10800 | Patient007B | Patient258A2 |
| 10800 | Patient033  | Patient045B  |

|       |             |              |
|-------|-------------|--------------|
| 10800 | Patient033  | Patient120C  |
| 10801 | Patient007A | Patient217H  |
| 10801 | Patient007A | Patient217I  |
| 10801 | Patient033  | Patient045C  |
| 10802 | Patient007A | Patient217B  |
| 10802 | Patient007A | Patient217C  |
| 10802 | Patient032D | Patient075   |
| 10802 | Patient033  | Patient161B  |
| 10803 | Patient007A | Patient217D  |
| 10803 | Patient007A | Patient217E  |
| 10803 | Patient007A | Patient217F  |
| 10803 | Patient007B | Patient081A2 |
| 10804 | Patient013  | Patient192E  |
| 10804 | Patient033  | Patient220B  |
| 10805 | Patient007B | Patient081A1 |
| 10805 | Patient033  | Patient120D  |
| 10805 | Patient033  | Patient150B  |
| 10806 | Patient128  | Patient220B  |
| 10807 | Patient007B | Patient242   |
| 10807 | Patient055  | Patient146   |
| 10808 | Patient007B | Patient217A  |
| 10808 | Patient033  | Patient126C  |
| 10809 | Patient007B | Patient217H  |
| 10809 | Patient007B | Patient217I  |
| 10809 | Patient013  | Patient103D  |
| 10810 | Patient007B | Patient217B  |
| 10810 | Patient007B | Patient217C  |
| 10811 | Patient007A | Patient217J  |
| 10811 | Patient007B | Patient217D  |
| 10811 | Patient007B | Patient217E  |
| 10812 | Patient007B | Patient217F  |
| 10812 | Patient033  | Patient173B  |
| 10813 | Patient013  | Patient192F  |
| 10815 | Patient013  | Patient103E  |
| 10816 | Patient007A | Patient241   |
| 10820 | Patient007B | Patient217J  |
| 10822 | Patient146  | Patient194   |
| 10823 | Patient007A | Patient141B  |
| 10824 | Patient007B | Patient241   |
| 10826 | Patient007A | Patient141C  |
| 10826 | Patient007A | Patient150C  |
| 10827 | Patient007A | Patient258E  |
| 10828 | Patient033  | Patient235B  |
| 10829 | Patient007A | Patient141A  |
| 10829 | Patient007B | Patient141B  |
| 10830 | Patient007A | Patient230D  |
| 10831 | Patient007A | Patient230A  |
| 10831 | Patient007B | Patient141C  |
| 10831 | Patient033  | Patient235C  |
| 10832 | Patient007B | Patient150C  |

|       |              |             |
|-------|--------------|-------------|
| 10832 | Patient033   | Patient213A |
| 10833 | Patient007A  | Patient150A |
| 10833 | Patient007B  | Patient150A |
| 10835 | Patient007B  | Patient141A |
| 10836 | Patient007A  | Patient150B |
| 10836 | Patient103D  | Patient128  |
| 10837 | Patient007B  | Patient230A |
| 10837 | Patient007B  | Patient230D |
| 10837 | Patient007B  | Patient258E |
| 10838 | Patient128   | Patient195  |
| 10841 | Patient103E  | Patient128  |
| 10842 | Patient007B  | Patient150B |
| 10843 | Patient128   | Patient206  |
| 10846 | Patient007A  | Patient026C |
| 10846 | Patient007A  | Patient230F |
| 10847 | Patient007A  | Patient220B |
| 10848 | Patient054   | Patient092C |
| 10852 | Patient007A  | Patient230E |
| 10852 | Patient007B  | Patient230F |
| 10853 | Patient091A  | Patient146  |
| 10854 | Patient007A  | Patient230B |
| 10854 | Patient007B  | Patient026C |
| 10855 | Patient007A  | Patient161B |
| 10855 | Patient007B  | Patient220B |
| 10856 | Patient007A  | Patient173B |
| 10857 | Patient007B  | Patient230E |
| 10858 | Patient053A1 | Patient075  |
| 10860 | Patient007B  | Patient230B |
| 10861 | Patient007B  | Patient161B |
| 10861 | Patient007B  | Patient173B |
| 10861 | Patient028   | Patient032D |
| 10862 | Patient128   | Patient251  |
| 10863 | Patient007A  | Patient026D |
| 10864 | Patient007A  | Patient126C |
| 10865 | Patient075   | Patient207  |
| 10868 | Patient022B  | Patient128  |
| 10870 | Patient007A  | Patient066D |
| 10870 | Patient007B  | Patient026D |
| 10870 | Patient007B  | Patient126C |
| 10870 | Patient066A  | Patient146  |
| 10872 | Patient007A  | Patient026E |
| 10876 | Patient007B  | Patient066D |
| 10878 | Patient007A  | Patient066E |
| 10878 | Patient007B  | Patient026E |
| 10879 | Patient074B  | Patient128  |
| 10880 | Patient007A  | Patient066F |
| 10880 | Patient074D  | Patient128  |
| 10882 | Patient074A  | Patient128  |
| 10883 | Patient028   | Patient146  |
| 10883 | Patient074C  | Patient128  |

|       |              |             |
|-------|--------------|-------------|
| 10884 | Patient007B  | Patient066E |
| 10885 | Patient007A  | Patient045A |
| 10886 | Patient007B  | Patient066F |
| 10887 | Patient007A  | Patient045C |
| 10888 | Patient120D  | Patient128  |
| 10890 | Patient007A  | Patient045B |
| 10891 | Patient007A  | Patient026A |
| 10891 | Patient007A  | Patient026B |
| 10891 | Patient007B  | Patient045A |
| 10892 | Patient007A  | Patient026F |
| 10893 | Patient007B  | Patient045C |
| 10893 | Patient013   | Patient120A |
| 10893 | Patient054   | Patient092D |
| 10893 | Patient074E  | Patient128  |
| 10895 | Patient120B  | Patient128  |
| 10896 | Patient007B  | Patient026B |
| 10896 | Patient007B  | Patient045B |
| 10897 | Patient007B  | Patient026A |
| 10897 | Patient066A  | Patient086C |
| 10898 | Patient007B  | Patient026F |
| 10898 | Patient120A  | Patient128  |
| 10899 | Patient075   | Patient086C |
| 10899 | Patient120C  | Patient128  |
| 10901 | Patient075   | Patient092C |
| 10905 | Patient007A  | Patient235A |
| 10906 | Patient146   | Patient196F |
| 10907 | Patient013   | Patient120B |
| 10907 | Patient146   | Patient263A |
| 10908 | Patient031   | Patient032D |
| 10908 | Patient066A  | Patient086B |
| 10909 | Patient013   | Patient120C |
| 10910 | Patient013   | Patient120D |
| 10910 | Patient066A  | Patient086E |
| 10911 | Patient032D  | Patient066A |
| 10911 | Patient066A  | Patient086A |
| 10911 | Patient075   | Patient086A |
| 10912 | Patient007A  | Patient120A |
| 10912 | Patient045D  | Patient146  |
| 10912 | Patient075   | Patient086B |
| 10913 | Patient007B  | Patient235A |
| 10913 | Patient146   | Patient222C |
| 10915 | Patient075   | Patient086E |
| 10916 | Patient094A  | Patient146  |
| 10918 | Patient032D  | Patient054  |
| 10920 | Patient007B  | Patient120A |
| 10920 | Patient093A  | Patient146  |
| 10921 | Patient093D  | Patient146  |
| 10922 | Patient093E  | Patient146  |
| 10922 | Patient094B  | Patient146  |
| 10924 | Patient053A1 | Patient066A |



|       |              |              |
|-------|--------------|--------------|
| 10925 | Patient066A  | Patient242   |
| 10926 | Patient031   | Patient092C  |
| 10926 | Patient075   | Patient164   |
| 10926 | Patient146   | Patient158   |
| 10927 | Patient007A  | Patient173A  |
| 10930 | Patient007A  | Patient195   |
| 10930 | Patient075   | Patient090   |
| 10930 | Patient094C  | Patient146   |
| 10931 | Patient007A  | Patient181A  |
| 10931 | Patient007B  | Patient173A  |
| 10931 | Patient054   | Patient121A  |
| 10933 | Patient075   | Patient192D  |
| 10935 | Patient007A  | Patient181B  |
| 10935 | Patient054   | Patient146   |
| 10936 | Patient007B  | Patient195   |
| 10936 | Patient075   | Patient251   |
| 10937 | Patient007B  | Patient181A  |
| 10938 | Patient007A  | Patient126A  |
| 10938 | Patient007A  | Patient224B  |
| 10938 | Patient072   | Patient146   |
| 10939 | Patient054   | Patient121B  |
| 10939 | Patient075   | Patient092D  |
| 10940 | Patient053C  | Patient054   |
| 10941 | Patient007B  | Patient181B  |
| 10941 | Patient053B  | Patient054   |
| 10943 | Patient053A2 | Patient054   |
| 10944 | Patient007B  | Patient126A  |
| 10944 | Patient007B  | Patient224B  |
| 10944 | Patient038   | Patient146   |
| 10945 | Patient066A  | Patient241   |
| 10946 | Patient007A  | Patient103C  |
| 10946 | Patient075   | Patient258D  |
| 10947 | Patient075   | Patient133   |
| 10947 | Patient100A  | Patient146   |
| 10948 | Patient075   | Patient146   |
| 10948 | Patient075   | Patient258A1 |
| 10948 | Patient075   | Patient258B  |
| 10948 | Patient075   | Patient258F  |
| 10949 | Patient038   | Patient053A1 |
| 10949 | Patient075   | Patient206   |
| 10950 | Patient007A  | Patient103B  |
| 10950 | Patient075   | Patient258G  |
| 10951 | Patient007B  | Patient103C  |
| 10951 | Patient053A1 | Patient054   |
| 10952 | Patient075   | Patient258A2 |
| 10955 | Patient075   | Patient121A  |
| 10955 | Patient146   | Patient202   |
| 10956 | Patient007B  | Patient103B  |
| 10958 | Patient075   | Patient141G  |
| 10959 | Patient007A  | Patient224A  |

|       |              |              |
|-------|--------------|--------------|
| 10960 | Patient075   | Patient081E  |
| 10961 | Patient007B  | Patient224A  |
| 10962 | Patient075   | Patient081F  |
| 10963 | Patient075   | Patient121B  |
| 10963 | Patient075   | Patient258E  |
| 10963 | Patient075   | Patient261G  |
| 10964 | Patient007A  | Patient235C  |
| 10964 | Patient053A1 | Patient204   |
| 10964 | Patient075   | Patient217A  |
| 10964 | Patient075   | Patient217I  |
| 10965 | Patient075   | Patient217C  |
| 10966 | Patient007A  | Patient235B  |
| 10966 | Patient075   | Patient081C  |
| 10966 | Patient075   | Patient217B  |
| 10966 | Patient075   | Patient217F  |
| 10966 | Patient146   | Patient204   |
| 10966 | Patient146   | Patient247D  |
| 10967 | Patient032D  | Patient204   |
| 10967 | Patient075   | Patient081B  |
| 10967 | Patient075   | Patient217D  |
| 10967 | Patient075   | Patient217E  |
| 10967 | Patient075   | Patient230C  |
| 10968 | Patient075   | Patient217H  |
| 10968 | Patient075   | Patient220B  |
| 10970 | Patient007B  | Patient235C  |
| 10970 | Patient053C  | Patient075   |
| 10970 | Patient146   | Patient157   |
| 10971 | Patient075   | Patient081A1 |
| 10971 | Patient075   | Patient081A2 |
| 10972 | Patient007B  | Patient235B  |
| 10972 | Patient031   | Patient242   |
| 10972 | Patient075   | Patient081D  |
| 10972 | Patient075   | Patient167   |
| 10972 | Patient093B  | Patient146   |
| 10972 | Patient146   | Patient246A  |
| 10973 | Patient053A2 | Patient075   |
| 10973 | Patient054   | Patient150C  |
| 10973 | Patient075   | Patient141D  |
| 10973 | Patient075   | Patient145B  |
| 10973 | Patient075   | Patient217J  |
| 10974 | Patient053B  | Patient075   |
| 10976 | Patient054   | Patient150A  |
| 10976 | Patient075   | Patient241   |
| 10976 | Patient093C  | Patient146   |
| 10977 | Patient032A  | Patient075   |
| 10977 | Patient054   | Patient123A  |
| 10977 | Patient075   | Patient141F  |
| 10977 | Patient075   | Patient173B  |
| 10977 | Patient075   | Patient230G  |
| 10979 | Patient007A  | Patient120B  |

|       |              |              |
|-------|--------------|--------------|
| 10979 | Patient031   | Patient241   |
| 10979 | Patient032B  | Patient075   |
| 10979 | Patient066A  | Patient258A1 |
| 10980 | Patient007A  | Patient120C  |
| 10980 | Patient094D  | Patient146   |
| 10981 | Patient007A  | Patient120D  |
| 10981 | Patient066A  | Patient258D  |
| 10982 | Patient054   | Patient123C  |
| 10982 | Patient066A  | Patient258B  |
| 10983 | Patient031   | Patient251   |
| 10983 | Patient032E  | Patient075   |
| 10983 | Patient066A  | Patient258F  |
| 10983 | Patient104B  | Patient146   |
| 10983 | Patient108B2 | Patient146   |
| 10984 | Patient026C  | Patient075   |
| 10984 | Patient066A  | Patient258A2 |
| 10984 | Patient066A  | Patient258G  |
| 10984 | Patient075   | Patient261A  |
| 10984 | Patient104A  | Patient146   |
| 10985 | Patient007B  | Patient120B  |
| 10985 | Patient032C  | Patient075   |
| 10985 | Patient053A1 | Patient158   |
| 10985 | Patient054   | Patient123B  |
| 10985 | Patient075   | Patient141C  |
| 10985 | Patient075   | Patient145C  |
| 10985 | Patient075   | Patient230A  |
| 10985 | Patient094E  | Patient146   |
| 10986 | Patient007B  | Patient120C  |
| 10986 | Patient075   | Patient141A  |
| 10986 | Patient075   | Patient141B  |
| 10987 | Patient007B  | Patient120D  |
| 10987 | Patient031   | Patient090   |
| 10987 | Patient034A  | Patient075   |
| 10987 | Patient045A  | Patient054   |
| 10987 | Patient054   | Patient123D  |
| 10987 | Patient146   | Patient210   |
| 10987 | Patient146   | Patient247B  |
| 10987 | Patient146   | Patient247C  |
| 10988 | Patient054   | Patient150B  |
| 10988 | Patient066A  | Patient092C  |
| 10988 | Patient158   | Patient251   |
| 10989 | Patient034B  | Patient075   |
| 10989 | Patient034E  | Patient075   |
| 10989 | Patient075   | Patient161B  |
| 10989 | Patient126D  | Patient146   |
| 10989 | Patient146   | Patient213B  |
| 10989 | Patient146   | Patient247A  |
| 10990 | Patient026D  | Patient054   |
| 10990 | Patient034C  | Patient075   |
| 10990 | Patient034D  | Patient075   |

|       |              |              |
|-------|--------------|--------------|
| 10990 | Patient075   | Patient261E  |
| 10991 | Patient026F  | Patient054   |
| 10991 | Patient031   | Patient053A1 |
| 10991 | Patient045B  | Patient054   |
| 10991 | Patient075   | Patient261B  |
| 10991 | Patient108B1 | Patient146   |
| 10992 | Patient007A  | Patient074B  |
| 10992 | Patient075   | Patient150C  |
| 10993 | Patient007A  | Patient074A  |
| 10993 | Patient045C  | Patient054   |
| 10993 | Patient075   | Patient145A  |
| 10993 | Patient075   | Patient150A  |
| 10994 | Patient007A  | Patient074D  |
| 10994 | Patient026A  | Patient054   |
| 10994 | Patient026B  | Patient054   |
| 10994 | Patient075   | Patient261C  |
| 10995 | Patient007A  | Patient074C  |
| 10995 | Patient075   | Patient242   |
| 10995 | Patient146   | Patient205   |
| 10996 | Patient066A  | Patient258E  |
| 10996 | Patient075   | Patient230E  |
| 10997 | Patient028   | Patient133   |
| 10997 | Patient038   | Patient092C  |
| 10997 | Patient054   | Patient251   |
| 10997 | Patient146   | Patient265   |
| 10998 | Patient007B  | Patient074B  |
| 10998 | Patient026E  | Patient054   |
| 10998 | Patient031   | Patient258D  |
| 10998 | Patient045D  | Patient133   |
| 10998 | Patient075   | Patient150B  |
| 10999 | Patient007B  | Patient074A  |
| 10999 | Patient028   | Patient164   |
| 10999 | Patient031   | Patient207   |
| 10999 | Patient075   | Patient261D  |
| 11000 | Patient007B  | Patient074D  |
| 11000 | Patient031   | Patient092D  |
| 11000 | Patient066A  | Patient192D  |
| 11000 | Patient146   | Patient159   |
| 11001 | Patient007A  | Patient074E  |
| 11001 | Patient075   | Patient230D  |
| 11002 | Patient007B  | Patient074C  |
| 11002 | Patient031   | Patient258F  |
| 11002 | Patient031   | Patient258G  |
| 11002 | Patient075   | Patient230F  |
| 11003 | Patient031   | Patient258A1 |
| 11003 | Patient066D  | Patient075   |
| 11003 | Patient108A  | Patient146   |
| 11003 | Patient126E  | Patient146   |
| 11003 | Patient146   | Patient220A  |
| 11003 | Patient146   | Patient247E  |

|       |              |              |
|-------|--------------|--------------|
| 11004 | Patient031   | Patient258A2 |
| 11004 | Patient031   | Patient258B  |
| 11005 | Patient053A1 | Patient205   |
| 11005 | Patient127A  | Patient146   |
| 11006 | Patient013   | Patient146   |
| 11006 | Patient146   | Patient236B  |
| 11007 | Patient007B  | Patient074E  |
| 11007 | Patient028   | Patient092C  |
| 11007 | Patient032D  | Patient093C  |
| 11007 | Patient100A  | Patient133   |
| 11008 | Patient108H  | Patient146   |
| 11008 | Patient146   | Patient189A  |
| 11009 | Patient031   | Patient086C  |
| 11009 | Patient053A1 | Patient210   |
| 11009 | Patient075   | Patient123A  |
| 11009 | Patient097A  | Patient146   |
| 11009 | Patient109C  | Patient146   |
| 11009 | Patient109D  | Patient146   |
| 11010 | Patient099E  | Patient146   |
| 11010 | Patient108G  | Patient146   |
| 11010 | Patient146   | Patient189B  |
| 11010 | Patient146   | Patient252D  |
| 11011 | Patient075   | Patient123B  |
| 11011 | Patient075   | Patient123C  |
| 11011 | Patient075   | Patient126C  |
| 11011 | Patient075   | Patient230B  |
| 11011 | Patient097E  | Patient146   |
| 11011 | Patient109E  | Patient146   |
| 11012 | Patient032D  | Patient205   |
| 11012 | Patient097D  | Patient146   |
| 11012 | Patient108D  | Patient146   |
| 11012 | Patient146   | Patient222B  |
| 11013 | Patient026C  | Patient066A  |
| 11013 | Patient032D  | Patient038   |
| 11013 | Patient127B  | Patient146   |
| 11013 | Patient133   | Patient196F  |
| 11013 | Patient133   | Patient222C  |
| 11014 | Patient097C  | Patient146   |
| 11014 | Patient146   | Patient189E  |
| 11014 | Patient146   | Patient196A  |
| 11015 | Patient054   | Patient258A1 |
| 11015 | Patient109A  | Patient146   |
| 11016 | Patient021A1 | Patient146   |
| 11016 | Patient054   | Patient192C  |
| 11016 | Patient054   | Patient258B  |
| 11016 | Patient054   | Patient258D  |
| 11016 | Patient066E  | Patient075   |
| 11016 | Patient066F  | Patient075   |
| 11016 | Patient146   | Patient196E  |
| 11017 | Patient021A2 | Patient146   |

|       |              |              |
|-------|--------------|--------------|
| 11017 | Patient026D  | Patient075   |
| 11017 | Patient054   | Patient192A  |
| 11017 | Patient075   | Patient123D  |
| 11017 | Patient079C  | Patient146   |
| 11017 | Patient100A  | Patient258A1 |
| 11017 | Patient100A  | Patient258D  |
| 11017 | Patient108F  | Patient146   |
| 11017 | Patient146   | Patient196B  |
| 11017 | Patient146   | Patient196C  |
| 11017 | Patient146   | Patient236A  |
| 11017 | Patient146   | Patient252A  |
| 11018 | Patient038   | Patient251   |
| 11018 | Patient054   | Patient258A2 |
| 11018 | Patient054   | Patient258F  |
| 11018 | Patient054   | Patient258G  |
| 11018 | Patient146   | Patient252F  |
| 11018 | Patient164   | Patient196F  |
| 11018 | Patient164   | Patient222C  |
| 11019 | Patient031   | Patient086A  |
| 11019 | Patient097B  | Patient146   |
| 11019 | Patient109B  | Patient146   |
| 11020 | Patient026E  | Patient075   |
| 11020 | Patient031   | Patient086E  |
| 11020 | Patient079A1 | Patient146   |
| 11020 | Patient100A  | Patient258B  |
| 11020 | Patient100A  | Patient258G  |
| 11020 | Patient133   | Patient263A  |
| 11020 | Patient146   | Patient222A  |
| 11020 | Patient146   | Patient232B  |
| 11020 | Patient146   | Patient252B  |
| 11021 | Patient032D  | Patient093B  |
| 11021 | Patient045A  | Patient075   |
| 11021 | Patient054   | Patient092H  |
| 11021 | Patient079A2 | Patient146   |
| 11021 | Patient100A  | Patient258F  |
| 11021 | Patient146   | Patient201B  |
| 11022 | Patient054   | Patient192B  |
| 11022 | Patient099B  | Patient146   |
| 11022 | Patient146   | Patient149B  |
| 11023 | Patient031   | Patient086B  |
| 11023 | Patient146   | Patient263B  |
| 11024 | Patient045B  | Patient075   |
| 11024 | Patient045C  | Patient075   |
| 11024 | Patient054   | Patient092G  |
| 11024 | Patient100A  | Patient258A2 |
| 11024 | Patient146   | Patient187   |
| 11024 | Patient146   | Patient222E  |
| 11024 | Patient146   | Patient222F  |
| 11024 | Patient146   | Patient232C  |
| 11025 | Patient032D  | Patient094A  |

|       |             |              |
|-------|-------------|--------------|
| 11025 | Patient045D | Patient167   |
| 11025 | Patient066A | Patient217A  |
| 11025 | Patient079B | Patient146   |
| 11025 | Patient099A | Patient146   |
| 11025 | Patient146  | Patient184   |
| 11025 | Patient146  | Patient232D  |
| 11026 | Patient031  | Patient258E  |
| 11026 | Patient146  | Patient222D  |
| 11026 | Patient164  | Patient263A  |
| 11027 | Patient026F | Patient075   |
| 11027 | Patient146  | Patient232A  |
| 11028 | Patient026A | Patient075   |
| 11028 | Patient026B | Patient075   |
| 11028 | Patient032D | Patient093A  |
| 11028 | Patient032D | Patient094D  |
| 11028 | Patient066A | Patient207   |
| 11028 | Patient066A | Patient217B  |
| 11028 | Patient066A | Patient217H  |
| 11028 | Patient066A | Patient217I  |
| 11028 | Patient099C | Patient146   |
| 11028 | Patient146  | Patient232E  |
| 11029 | Patient032D | Patient093D  |
| 11029 | Patient032D | Patient158   |
| 11029 | Patient054  | Patient258E  |
| 11029 | Patient066A | Patient092D  |
| 11029 | Patient066A | Patient217C  |
| 11029 | Patient066A | Patient217D  |
| 11029 | Patient075  | Patient183A  |
| 11029 | Patient075  | Patient235A  |
| 11029 | Patient099D | Patient146   |
| 11030 | Patient026C | Patient054   |
| 11030 | Patient031  | Patient141G  |
| 11030 | Patient032D | Patient093E  |
| 11030 | Patient032D | Patient094B  |
| 11030 | Patient038  | Patient192D  |
| 11030 | Patient066A | Patient217F  |
| 11030 | Patient146  | Patient201E  |
| 11030 | Patient146  | Patient218A  |
| 11030 | Patient146  | Patient218B  |
| 11031 | Patient031  | Patient121A  |
| 11031 | Patient032D | Patient210   |
| 11031 | Patient038  | Patient258A1 |
| 11031 | Patient066A | Patient217E  |
| 11032 | Patient054  | Patient092E  |
| 11032 | Patient075  | Patient183D  |
| 11032 | Patient146  | Patient201A  |
| 11033 | Patient031  | Patient133   |
| 11033 | Patient032D | Patient094E  |
| 11033 | Patient038  | Patient258D  |
| 11034 | Patient028  | Patient167   |

|       |             |              |
|-------|-------------|--------------|
| 11034 | Patient031  | Patient121B  |
| 11034 | Patient038  | Patient258B  |
| 11034 | Patient054  | Patient092A  |
| 11034 | Patient054  | Patient213A  |
| 11035 | Patient038  | Patient258F  |
| 11035 | Patient054  | Patient177   |
| 11035 | Patient054  | Patient192E  |
| 11036 | Patient032D | Patient094C  |
| 11036 | Patient038  | Patient258A2 |
| 11036 | Patient038  | Patient258G  |
| 11036 | Patient054  | Patient217A  |
| 11036 | Patient054  | Patient235C  |
| 11036 | Patient054  | Patient235F  |
| 11036 | Patient075  | Patient183E  |
| 11037 | Patient031  | Patient206   |
| 11038 | Patient023  | Patient146   |
| 11038 | Patient054  | Patient217I  |
| 11038 | Patient054  | Patient235E  |
| 11038 | Patient075  | Patient183C  |
| 11038 | Patient131  | Patient146   |
| 11038 | Patient146  | Patient246B  |
| 11038 | Patient146  | Patient246C  |
| 11039 | Patient054  | Patient217B  |
| 11039 | Patient054  | Patient217H  |
| 11039 | Patient158  | Patient207   |
| 11040 | Patient054  | Patient092B  |
| 11040 | Patient054  | Patient217C  |
| 11040 | Patient054  | Patient217D  |
| 11040 | Patient066A | Patient217J  |
| 11040 | Patient075  | Patient183B  |
| 11041 | Patient031  | Patient217A  |
| 11041 | Patient038  | Patient092D  |
| 11041 | Patient054  | Patient217F  |
| 11041 | Patient054  | Patient235B  |
| 11041 | Patient075  | Patient176   |
| 11042 | Patient054  | Patient217E  |
| 11043 | Patient031  | Patient081C  |
| 11043 | Patient031  | Patient217C  |
| 11043 | Patient054  | Patient192F  |
| 11043 | Patient075  | Patient173A  |
| 11043 | Patient100A | Patient167   |
| 11043 | Patient146  | Patient246D  |
| 11044 | Patient031  | Patient192D  |
| 11044 | Patient066A | Patient164   |
| 11045 | Patient028  | Patient086C  |
| 11045 | Patient066A | Patient141G  |
| 11045 | Patient090  | Patient100A  |
| 11046 | Patient028  | Patient241   |
| 11046 | Patient031  | Patient217B  |
| 11046 | Patient031  | Patient217D  |



|       |              |              |
|-------|--------------|--------------|
| 11046 | Patient054   | Patient141G  |
| 11046 | Patient075   | Patient192B  |
| 11046 | Patient092C  | Patient204   |
| 11046 | Patient167   | Patient222C  |
| 11047 | Patient031   | Patient217E  |
| 11047 | Patient031   | Patient217F  |
| 11047 | Patient031   | Patient217H  |
| 11047 | Patient031   | Patient217I  |
| 11047 | Patient031   | Patient261G  |
| 11047 | Patient038   | Patient086C  |
| 11047 | Patient075   | Patient192C  |
| 11047 | Patient167   | Patient196F  |
| 11048 | Patient031   | Patient141F  |
| 11048 | Patient146   | Patient196D  |
| 11048 | Patient146   | Patient246E  |
| 11049 | Patient075   | Patient192A  |
| 11050 | Patient031   | Patient230C  |
| 11050 | Patient038   | Patient258E  |
| 11050 | Patient086C  | Patient204   |
| 11050 | Patient100A  | Patient251   |
| 11051 | Patient031   | Patient032E  |
| 11051 | Patient031   | Patient081D  |
| 11051 | Patient031   | Patient167   |
| 11051 | Patient038   | Patient217A  |
| 11051 | Patient054   | Patient164   |
| 11051 | Patient054   | Patient217J  |
| 11051 | Patient204   | Patient258A1 |
| 11052 | Patient031   | Patient217J  |
| 11052 | Patient032D  | Patient126D  |
| 11052 | Patient066A  | Patient133   |
| 11053 | Patient031   | Patient032C  |
| 11053 | Patient031   | Patient053B  |
| 11053 | Patient031   | Patient053C  |
| 11053 | Patient054   | Patient133   |
| 11053 | Patient204   | Patient258D  |
| 11054 | Patient038   | Patient217B  |
| 11054 | Patient038   | Patient217H  |
| 11054 | Patient038   | Patient217I  |
| 11054 | Patient053A1 | Patient093C  |
| 11054 | Patient054   | Patient183A  |
| 11054 | Patient167   | Patient263A  |
| 11054 | Patient204   | Patient258B  |
| 11055 | Patient028   | Patient086A  |
| 11055 | Patient028   | Patient086B  |
| 11055 | Patient031   | Patient053A2 |
| 11055 | Patient031   | Patient150A  |
| 11055 | Patient031   | Patient230G  |
| 11055 | Patient038   | Patient217C  |
| 11055 | Patient038   | Patient217D  |
| 11055 | Patient204   | Patient258A2 |

|       |              |              |
|-------|--------------|--------------|
| 11055 | Patient204   | Patient258F  |
| 11055 | Patient204   | Patient258G  |
| 11056 | Patient022B  | Patient031   |
| 11056 | Patient026D  | Patient031   |
| 11056 | Patient031   | Patient145B  |
| 11056 | Patient038   | Patient217F  |
| 11056 | Patient038   | Patient242   |
| 11057 | Patient026C  | Patient031   |
| 11057 | Patient028   | Patient086E  |
| 11057 | Patient038   | Patient217E  |
| 11057 | Patient045D  | Patient090   |
| 11057 | Patient157   | Patient251   |
| 11057 | Patient158   | Patient258A1 |
| 11058 | Patient038   | Patient086B  |
| 11058 | Patient075   | Patient192E  |
| 11058 | Patient158   | Patient258D  |
| 11059 | Patient022B  | Patient075   |
| 11059 | Patient031   | Patient176   |
| 11059 | Patient054   | Patient183D  |
| 11060 | Patient026E  | Patient031   |
| 11060 | Patient038   | Patient086E  |
| 11060 | Patient053A1 | Patient131   |
| 11060 | Patient066A  | Patient081E  |
| 11060 | Patient066A  | Patient230C  |
| 11060 | Patient158   | Patient258B  |
| 11061 | Patient031   | Patient150C  |
| 11061 | Patient038   | Patient086A  |
| 11061 | Patient066A  | Patient251   |
| 11061 | Patient158   | Patient258F  |
| 11061 | Patient158   | Patient258G  |
| 11062 | Patient054   | Patient081E  |
| 11062 | Patient054   | Patient086C  |
| 11062 | Patient075   | Patient192F  |
| 11062 | Patient075   | Patient224A  |
| 11062 | Patient086B  | Patient204   |
| 11062 | Patient158   | Patient206   |
| 11062 | Patient158   | Patient258A2 |
| 11063 | Patient054   | Patient230C  |
| 11063 | Patient066A  | Patient081B  |
| 11064 | Patient031   | Patient150B  |
| 11064 | Patient066A  | Patient081F  |
| 11064 | Patient086A  | Patient204   |
| 11064 | Patient086E  | Patient204   |
| 11065 | Patient031   | Patient081B  |
| 11065 | Patient032B  | Patient066A  |
| 11065 | Patient054   | Patient081F  |
| 11065 | Patient210   | Patient220B  |
| 11066 | Patient028   | Patient092D  |
| 11066 | Patient028   | Patient176   |
| 11066 | Patient028   | Patient242   |

|       |              |              |
|-------|--------------|--------------|
| 11066 | Patient038   | Patient217J  |
| 11066 | Patient054   | Patient081B  |
| 11066 | Patient054   | Patient081C  |
| 11066 | Patient066A  | Patient081A2 |
| 11066 | Patient066A  | Patient081C  |
| 11066 | Patient075   | Patient092H  |
| 11066 | Patient075   | Patient103C  |
| 11066 | Patient100A  | Patient207   |
| 11067 | Patient075   | Patient092G  |
| 11068 | Patient031   | Patient081E  |
| 11068 | Patient054   | Patient261G  |
| 11068 | Patient066A  | Patient141A  |
| 11068 | Patient075   | Patient224B  |
| 11068 | Patient086C  | Patient158   |
| 11069 | Patient031   | Patient220B  |
| 11069 | Patient053A1 | Patient093B  |
| 11069 | Patient054   | Patient183C  |
| 11069 | Patient066A  | Patient141C  |
| 11069 | Patient075   | Patient103B  |
| 11069 | Patient204   | Patient258E  |
| 11070 | Patient026C  | Patient204   |
| 11070 | Patient031   | Patient183D  |
| 11070 | Patient032B  | Patient054   |
| 11070 | Patient033   | Patient146   |
| 11070 | Patient054   | Patient081A2 |
| 11070 | Patient054   | Patient081D  |
| 11070 | Patient054   | Patient183B  |
| 11070 | Patient066A  | Patient081A1 |
| 11070 | Patient066A  | Patient141B  |
| 11070 | Patient066A  | Patient141D  |
| 11070 | Patient066A  | Patient230G  |
| 11070 | Patient090   | Patient210   |
| 11070 | Patient204   | Patient217A  |
| 11071 | Patient028   | Patient090   |
| 11071 | Patient031   | Patient081F  |
| 11071 | Patient031   | Patient261E  |
| 11071 | Patient054   | Patient141D  |
| 11071 | Patient066A  | Patient081D  |
| 11071 | Patient066A  | Patient121A  |
| 11071 | Patient075   | Patient092A  |
| 11071 | Patient075   | Patient126A  |
| 11072 | Patient031   | Patient081A2 |
| 11072 | Patient032E  | Patient066A  |
| 11072 | Patient053A1 | Patient094A  |
| 11072 | Patient054   | Patient230G  |
| 11072 | Patient066A  | Patient141F  |
| 11072 | Patient066A  | Patient230A  |
| 11072 | Patient074D  | Patient075   |
| 11072 | Patient207   | Patient210   |
| 11073 | Patient032A  | Patient066A  |

|       |              |              |
|-------|--------------|--------------|
| 11073 | Patient054   | Patient081A1 |
| 11073 | Patient054   | Patient141F  |
| 11073 | Patient054   | Patient183E  |
| 11073 | Patient074A  | Patient075   |
| 11073 | Patient074B  | Patient075   |
| 11073 | Patient075   | Patient092B  |
| 11073 | Patient204   | Patient217B  |
| 11073 | Patient204   | Patient217H  |
| 11073 | Patient204   | Patient217I  |
| 11074 | Patient031   | Patient081A1 |
| 11074 | Patient031   | Patient164   |
| 11074 | Patient031   | Patient183B  |
| 11074 | Patient031   | Patient261C  |
| 11074 | Patient032D  | Patient126E  |
| 11074 | Patient054   | Patient086B  |
| 11074 | Patient074C  | Patient075   |
| 11074 | Patient158   | Patient192D  |
| 11074 | Patient204   | Patient217C  |
| 11074 | Patient204   | Patient217D  |
| 11075 | Patient026C  | Patient038   |
| 11075 | Patient031   | Patient183C  |
| 11075 | Patient034A  | Patient066A  |
| 11075 | Patient053A1 | Patient093A  |
| 11075 | Patient053A1 | Patient093D  |
| 11075 | Patient066A  | Patient261G  |
| 11075 | Patient075   | Patient092E  |
| 11075 | Patient075   | Patient181A  |
| 11075 | Patient075   | Patient195   |
| 11075 | Patient204   | Patient217F  |
| 11076 | Patient031   | Patient183A  |
| 11076 | Patient031   | Patient183E  |
| 11076 | Patient045D  | Patient176   |
| 11076 | Patient053A1 | Patient093E  |
| 11076 | Patient053A1 | Patient094B  |
| 11076 | Patient053A1 | Patient094D  |
| 11076 | Patient054   | Patient086A  |
| 11076 | Patient054   | Patient086E  |
| 11076 | Patient054   | Patient192D  |
| 11076 | Patient054   | Patient235A  |
| 11076 | Patient066A  | Patient145B  |
| 11076 | Patient204   | Patient217E  |
| 11077 | Patient031   | Patient141D  |
| 11077 | Patient032A  | Patient054   |
| 11077 | Patient034E  | Patient066A  |
| 11077 | Patient075   | Patient181B  |
| 11078 | Patient034C  | Patient066A  |
| 11078 | Patient066A  | Patient121B  |
| 11078 | Patient066A  | Patient145C  |
| 11078 | Patient066A  | Patient230E  |
| 11078 | Patient176   | Patient222C  |

|       |              |              |
|-------|--------------|--------------|
| 11078 | Patient192D  | Patient210   |
| 11078 | Patient196F  | Patient241   |
| 11079 | Patient031   | Patient045A  |
| 11079 | Patient031   | Patient141A  |
| 11079 | Patient032E  | Patient054   |
| 11079 | Patient045D  | Patient141G  |
| 11079 | Patient066A  | Patient066D  |
| 11079 | Patient066A  | Patient161B  |
| 11079 | Patient066A  | Patient176   |
| 11079 | Patient066A  | Patient261A  |
| 11079 | Patient086B  | Patient158   |
| 11079 | Patient086E  | Patient158   |
| 11079 | Patient090   | Patient222C  |
| 11079 | Patient092C  | Patient158   |
| 11079 | Patient176   | Patient196F  |
| 11080 | Patient031   | Patient045C  |
| 11080 | Patient031   | Patient123A  |
| 11080 | Patient032D  | Patient108B1 |
| 11080 | Patient032D  | Patient108B2 |
| 11080 | Patient038   | Patient241   |
| 11080 | Patient066A  | Patient261E  |
| 11080 | Patient074E  | Patient075   |
| 11080 | Patient086A  | Patient158   |
| 11080 | Patient158   | Patient258E  |
| 11080 | Patient222C  | Patient241   |
| 11081 | Patient026C  | Patient158   |
| 11081 | Patient031   | Patient032A  |
| 11081 | Patient031   | Patient141C  |
| 11081 | Patient034A  | Patient054   |
| 11081 | Patient034D  | Patient066A  |
| 11081 | Patient053A1 | Patient094E  |
| 11081 | Patient054   | Patient141B  |
| 11081 | Patient054   | Patient145B  |
| 11081 | Patient075   | Patient213A  |
| 11081 | Patient241   | Patient263A  |
| 11082 | Patient031   | Patient032B  |
| 11082 | Patient031   | Patient045B  |
| 11082 | Patient031   | Patient123B  |
| 11082 | Patient031   | Patient123C  |
| 11082 | Patient031   | Patient141B  |
| 11082 | Patient032C  | Patient066A  |
| 11082 | Patient053A1 | Patient094C  |
| 11082 | Patient054   | Patient141C  |
| 11082 | Patient054   | Patient176   |
| 11082 | Patient066A  | Patient206   |
| 11082 | Patient066A  | Patient230D  |
| 11082 | Patient066A  | Patient230F  |
| 11082 | Patient066A  | Patient235A  |
| 11082 | Patient092C  | Patient210   |
| 11082 | Patient204   | Patient207   |

|       |              |              |
|-------|--------------|--------------|
| 11083 | Patient031   | Patient145C  |
| 11083 | Patient034E  | Patient054   |
| 11083 | Patient038   | Patient053C  |
| 11083 | Patient054   | Patient141A  |
| 11083 | Patient054   | Patient145C  |
| 11083 | Patient075   | Patient103A  |
| 11083 | Patient092C  | Patient205   |
| 11083 | Patient158   | Patient217A  |
| 11084 | Patient032D  | Patient232B  |
| 11084 | Patient034C  | Patient054   |
| 11084 | Patient038   | Patient053B  |
| 11084 | Patient054   | Patient230A  |
| 11084 | Patient066A  | Patient230B  |
| 11084 | Patient090   | Patient196F  |
| 11085 | Patient038   | Patient053A2 |
| 11085 | Patient094A  | Patient251   |
| 11085 | Patient158   | Patient217C  |
| 11085 | Patient204   | Patient217J  |
| 11086 | Patient031   | Patient261A  |
| 11086 | Patient034B  | Patient066A  |
| 11086 | Patient053C  | Patient066A  |
| 11086 | Patient066A  | Patient167   |
| 11086 | Patient066A  | Patient173B  |
| 11086 | Patient158   | Patient217B  |
| 11086 | Patient158   | Patient217F  |
| 11086 | Patient158   | Patient217H  |
| 11086 | Patient158   | Patient217I  |
| 11086 | Patient210   | Patient258A1 |
| 11087 | Patient031   | Patient123D  |
| 11087 | Patient031   | Patient177   |
| 11087 | Patient034D  | Patient054   |
| 11087 | Patient053B  | Patient066A  |
| 11087 | Patient054   | Patient161B  |
| 11087 | Patient054   | Patient241   |
| 11087 | Patient054   | Patient261E  |
| 11087 | Patient066A  | Patient261B  |
| 11087 | Patient158   | Patient217D  |
| 11087 | Patient158   | Patient217E  |
| 11087 | Patient176   | Patient263A  |
| 11087 | Patient210   | Patient258D  |
| 11088 | Patient028   | Patient141G  |
| 11088 | Patient031   | Patient034A  |
| 11088 | Patient053A2 | Patient066A  |
| 11088 | Patient090   | Patient263A  |
| 11089 | Patient031   | Patient230D  |
| 11089 | Patient032C  | Patient054   |
| 11089 | Patient054   | Patient066D  |
| 11089 | Patient066A  | Patient066E  |
| 11089 | Patient066A  | Patient066F  |
| 11089 | Patient210   | Patient258B  |

|       |             |              |
|-------|-------------|--------------|
| 11089 | Patient210  | Patient258G  |
| 11090 | Patient032D | Patient232A  |
| 11090 | Patient032D | Patient232C  |
| 11090 | Patient054  | Patient261A  |
| 11090 | Patient075  | Patient177   |
| 11091 | Patient032D | Patient232E  |
| 11091 | Patient075  | Patient235C  |
| 11091 | Patient075  | Patient235F  |
| 11091 | Patient092D | Patient204   |
| 11091 | Patient210  | Patient258A2 |
| 11091 | Patient210  | Patient258F  |
| 11092 | Patient031  | Patient034B  |
| 11092 | Patient031  | Patient034D  |
| 11092 | Patient031  | Patient034E  |
| 11092 | Patient031  | Patient126C  |
| 11092 | Patient034B | Patient054   |
| 11092 | Patient075  | Patient235E  |
| 11092 | Patient204  | Patient241   |
| 11093 | Patient026F | Patient031   |
| 11093 | Patient028  | Patient207   |
| 11093 | Patient031  | Patient034C  |
| 11093 | Patient054  | Patient167   |
| 11093 | Patient075  | Patient235B  |
| 11093 | Patient086C | Patient205   |
| 11093 | Patient093A | Patient251   |
| 11094 | Patient028  | Patient121A  |
| 11094 | Patient066A | Patient145A  |
| 11094 | Patient093D | Patient251   |
| 11094 | Patient141G | Patient204   |
| 11094 | Patient205  | Patient258A1 |
| 11095 | Patient031  | Patient230E  |
| 11095 | Patient031  | Patient261B  |
| 11095 | Patient054  | Patient230E  |
| 11095 | Patient066A | Patient261D  |
| 11095 | Patient094B | Patient251   |
| 11095 | Patient133  | Patient204   |
| 11095 | Patient247D | Patient251   |
| 11096 | Patient026B | Patient031   |
| 11096 | Patient032D | Patient232D  |
| 11096 | Patient054  | Patient261B  |
| 11096 | Patient066A | Patient261C  |
| 11096 | Patient093E | Patient251   |
| 11096 | Patient158  | Patient217J  |
| 11096 | Patient205  | Patient258D  |
| 11097 | Patient031  | Patient145A  |
| 11097 | Patient031  | Patient230A  |
| 11097 | Patient204  | Patient251   |
| 11097 | Patient205  | Patient258B  |
| 11098 | Patient028  | Patient121B  |
| 11098 | Patient031  | Patient235A  |

|       |             |              |
|-------|-------------|--------------|
| 11098 | Patient054  | Patient066E  |
| 11098 | Patient054  | Patient066F  |
| 11098 | Patient054  | Patient230B  |
| 11098 | Patient205  | Patient258F  |
| 11099 | Patient023  | Patient053A1 |
| 11099 | Patient038  | Patient235A  |
| 11099 | Patient054  | Patient145A  |
| 11099 | Patient054  | Patient230F  |
| 11099 | Patient205  | Patient258A2 |
| 11099 | Patient205  | Patient258G  |
| 11100 | Patient026A | Patient031   |
| 11100 | Patient031  | Patient066D  |
| 11100 | Patient031  | Patient261D  |
| 11100 | Patient090  | Patient158   |
| 11100 | Patient094C | Patient251   |
| 11100 | Patient100A | Patient176   |
| 11100 | Patient196F | Patient242   |
| 11100 | Patient222C | Patient242   |
| 11101 | Patient028  | Patient081E  |
| 11101 | Patient028  | Patient081F  |
| 11101 | Patient045D | Patient207   |
| 11101 | Patient100A | Patient141G  |
| 11101 | Patient210  | Patient258E  |
| 11102 | Patient028  | Patient092G  |
| 11102 | Patient031  | Patient230F  |
| 11102 | Patient032D | Patient045D  |
| 11102 | Patient094A | Patient241   |
| 11102 | Patient141G | Patient196F  |
| 11102 | Patient158  | Patient242   |
| 11102 | Patient192D | Patient204   |
| 11102 | Patient242  | Patient263A  |
| 11103 | Patient028  | Patient081C  |
| 11103 | Patient045D | Patient261G  |
| 11103 | Patient054  | Patient261C  |
| 11103 | Patient207  | Patient222C  |
| 11104 | Patient031  | Patient066E  |
| 11104 | Patient038  | Patient121B  |
| 11104 | Patient045D | Patient230C  |
| 11104 | Patient054  | Patient126C  |
| 11105 | Patient031  | Patient120A  |
| 11105 | Patient031  | Patient161B  |
| 11105 | Patient032D | Patient131   |
| 11105 | Patient038  | Patient121A  |
| 11105 | Patient045D | Patient141F  |
| 11105 | Patient045D | Patient230G  |
| 11105 | Patient141G | Patient222C  |
| 11105 | Patient164  | Patient204   |
| 11105 | Patient210  | Patient217A  |
| 11106 | Patient028  | Patient053A1 |
| 11106 | Patient028  | Patient081A2 |



|       |             |              |
|-------|-------------|--------------|
| 11106 | Patient028  | Patient081B  |
| 11106 | Patient031  | Patient066F  |
| 11106 | Patient054  | Patient261D  |
| 11106 | Patient196F | Patient207   |
| 11107 | Patient026D | Patient066A  |
| 11107 | Patient054  | Patient230D  |
| 11107 | Patient086B | Patient205   |
| 11107 | Patient210  | Patient217C  |
| 11108 | Patient028  | Patient053C  |
| 11108 | Patient028  | Patient081D  |
| 11108 | Patient038  | Patient150C  |
| 11108 | Patient204  | Patient230C  |
| 11108 | Patient204  | Patient242   |
| 11108 | Patient210  | Patient217B  |
| 11108 | Patient210  | Patient217E  |
| 11108 | Patient210  | Patient217F  |
| 11108 | Patient210  | Patient217H  |
| 11109 | Patient023  | Patient032D  |
| 11109 | Patient028  | Patient053A2 |
| 11109 | Patient028  | Patient053B  |
| 11109 | Patient031  | Patient213A  |
| 11109 | Patient086C | Patient093C  |
| 11109 | Patient086E | Patient205   |
| 11109 | Patient210  | Patient217D  |
| 11109 | Patient210  | Patient217I  |
| 11110 | Patient028  | Patient032B  |
| 11110 | Patient032E | Patient045D  |
| 11110 | Patient086A | Patient205   |
| 11110 | Patient086C | Patient210   |
| 11110 | Patient093A | Patient241   |
| 11110 | Patient093D | Patient241   |
| 11110 | Patient205  | Patient217A  |
| 11111 | Patient026D | Patient038   |
| 11111 | Patient028  | Patient081A1 |
| 11111 | Patient028  | Patient230C  |
| 11111 | Patient038  | Patient150A  |
| 11111 | Patient066A | Patient150C  |
| 11111 | Patient207  | Patient263A  |
| 11111 | Patient210  | Patient251   |
| 11112 | Patient028  | Patient141D  |
| 11112 | Patient031  | Patient092H  |
| 11112 | Patient031  | Patient173B  |
| 11112 | Patient033  | Patient121A  |
| 11112 | Patient075  | Patient120A  |
| 11112 | Patient094B | Patient241   |
| 11112 | Patient100A | Patient230C  |
| 11112 | Patient141G | Patient263A  |
| 11113 | Patient026E | Patient066A  |
| 11113 | Patient031  | Patient092G  |
| 11113 | Patient031  | Patient126A  |

|       |             |             |
|-------|-------------|-------------|
| 11113 | Patient031  | Patient230B |
| 11113 | Patient205  | Patient217B |
| 11113 | Patient205  | Patient217H |
| 11113 | Patient205  | Patient258E |
| 11114 | Patient026C | Patient205  |
| 11114 | Patient028  | Patient141B |
| 11114 | Patient032C | Patient045D |
| 11114 | Patient045D | Patient145B |
| 11114 | Patient066A | Patient123A |
| 11114 | Patient066A | Patient150A |
| 11114 | Patient093E | Patient241  |
| 11114 | Patient204  | Patient261G |
| 11114 | Patient205  | Patient217C |
| 11114 | Patient205  | Patient217D |
| 11115 | Patient028  | Patient141A |
| 11115 | Patient028  | Patient141C |
| 11115 | Patient028  | Patient141F |
| 11115 | Patient028  | Patient230G |
| 11115 | Patient028  | Patient261G |
| 11115 | Patient032D | Patient196F |
| 11115 | Patient066A | Patient120A |
| 11115 | Patient066A | Patient183A |
| 11115 | Patient205  | Patient217F |
| 11115 | Patient205  | Patient217I |
| 11116 | Patient028  | Patient032A |
| 11116 | Patient031  | Patient092A |
| 11116 | Patient031  | Patient192A |
| 11116 | Patient031  | Patient235E |
| 11116 | Patient038  | Patient133  |
| 11116 | Patient081E | Patient204  |
| 11116 | Patient094C | Patient241  |
| 11116 | Patient205  | Patient217E |
| 11117 | Patient026E | Patient038  |
| 11118 | Patient031  | Patient192B |
| 11118 | Patient032D | Patient222C |
| 11118 | Patient081C | Patient204  |
| 11118 | Patient210  | Patient217J |
| 11119 | Patient066A | Patient123C |
| 11119 | Patient066A | Patient126C |
| 11119 | Patient081B | Patient204  |
| 11119 | Patient100A | Patient230G |
| 11119 | Patient100A | Patient261G |
| 11119 | Patient204  | Patient230G |
| 11120 | Patient028  | Patient034A |
| 11120 | Patient031  | Patient092E |
| 11120 | Patient032E | Patient204  |
| 11120 | Patient038  | Patient045A |
| 11120 | Patient100A | Patient141F |
| 11121 | Patient028  | Patient032E |
| 11121 | Patient028  | Patient034E |

|       |              |             |
|-------|--------------|-------------|
| 11121 | Patient031   | Patient192C |
| 11121 | Patient032B  | Patient204  |
| 11121 | Patient075   | Patient103D |
| 11121 | Patient081F  | Patient204  |
| 11121 | Patient086B  | Patient093C |
| 11121 | Patient141F  | Patient204  |
| 11122 | Patient028   | Patient145B |
| 11122 | Patient028   | Patient145C |
| 11122 | Patient028   | Patient230A |
| 11122 | Patient031   | Patient235F |
| 11122 | Patient053A1 | Patient126E |
| 11122 | Patient066A  | Patient123B |
| 11122 | Patient066A  | Patient123D |
| 11122 | Patient066A  | Patient183D |
| 11122 | Patient081A2 | Patient204  |
| 11122 | Patient086A  | Patient093C |
| 11122 | Patient196F  | Patient230C |
| 11123 | Patient028   | Patient034C |
| 11123 | Patient031   | Patient092B |
| 11123 | Patient038   | Patient150B |
| 11123 | Patient081D  | Patient204  |
| 11123 | Patient086A  | Patient210  |
| 11123 | Patient086B  | Patient210  |
| 11123 | Patient086E  | Patient093C |
| 11123 | Patient222C  | Patient230C |
| 11124 | Patient028   | Patient034D |
| 11124 | Patient038   | Patient045B |
| 11124 | Patient054   | Patient173B |
| 11124 | Patient086C  | Patient093B |
| 11124 | Patient145B  | Patient204  |
| 11125 | Patient026F  | Patient066A |
| 11125 | Patient028   | Patient032C |
| 11125 | Patient038   | Patient164  |
| 11125 | Patient066A  | Patient195  |
| 11125 | Patient081C  | Patient196F |
| 11125 | Patient086E  | Patient210  |
| 11125 | Patient205   | Patient217J |
| 11126 | Patient026C  | Patient210  |
| 11126 | Patient032D  | Patient263A |
| 11126 | Patient038   | Patient045C |
| 11126 | Patient053A1 | Patient126D |
| 11126 | Patient066A  | Patient150B |
| 11126 | Patient066A  | Patient181B |
| 11126 | Patient075   | Patient103E |
| 11126 | Patient094A  | Patient242  |
| 11127 | Patient038   | Patient183A |
| 11127 | Patient045D  | Patient261E |
| 11127 | Patient081A1 | Patient204  |
| 11127 | Patient081C  | Patient222C |
| 11127 | Patient092D  | Patient158  |

|       |              |              |
|-------|--------------|--------------|
| 11127 | Patient100A  | Patient145B  |
| 11127 | Patient141D  | Patient204   |
| 11127 | Patient158   | Patient241   |
| 11127 | Patient204   | Patient235A  |
| 11127 | Patient205   | Patient207   |
| 11127 | Patient241   | Patient247D  |
| 11128 | Patient032E  | Patient100A  |
| 11128 | Patient054   | Patient120B  |
| 11128 | Patient054   | Patient120D  |
| 11128 | Patient054   | Patient126A  |
| 11128 | Patient066A  | Patient224A  |
| 11128 | Patient093C  | Patient133   |
| 11128 | Patient141F  | Patient196F  |
| 11128 | Patient176   | Patient204   |
| 11128 | Patient196F  | Patient261G  |
| 11129 | Patient028   | Patient150C  |
| 11129 | Patient032A  | Patient204   |
| 11129 | Patient038   | Patient141G  |
| 11129 | Patient053A1 | Patient108B1 |
| 11129 | Patient054   | Patient242   |
| 11129 | Patient066A  | Patient181A  |
| 11130 | Patient028   | Patient034B  |
| 11130 | Patient032C  | Patient204   |
| 11130 | Patient053A1 | Patient108B2 |
| 11130 | Patient066A  | Patient173A  |
| 11130 | Patient066A  | Patient183C  |
| 11130 | Patient086C  | Patient094A  |
| 11130 | Patient100A  | Patient230D  |
| 11130 | Patient196F  | Patient230G  |
| 11130 | Patient222C  | Patient261G  |
| 11130 | Patient230C  | Patient263A  |
| 11131 | Patient026A  | Patient066A  |
| 11131 | Patient026B  | Patient066A  |
| 11131 | Patient028   | Patient230E  |
| 11131 | Patient034A  | Patient204   |
| 11131 | Patient038   | Patient123A  |
| 11131 | Patient045A  | Patient066A  |
| 11131 | Patient053A1 | Patient232B  |
| 11131 | Patient066A  | Patient183B  |
| 11131 | Patient081D  | Patient196F  |
| 11131 | Patient086C  | Patient093D  |
| 11131 | Patient141F  | Patient222C  |
| 11131 | Patient157   | Patient258A1 |
| 11131 | Patient157   | Patient258D  |
| 11131 | Patient222C  | Patient230G  |
| 11132 | Patient028   | Patient161B  |
| 11132 | Patient032C  | Patient100A  |
| 11132 | Patient032D  | Patient100A  |
| 11132 | Patient034C  | Patient204   |
| 11132 | Patient054   | Patient120C  |

|       |             |              |
|-------|-------------|--------------|
| 11132 | Patient066A | Patient220B  |
| 11132 | Patient086C | Patient093A  |
| 11132 | Patient086C | Patient093E  |
| 11132 | Patient086C | Patient094B  |
| 11132 | Patient086C | Patient094D  |
| 11132 | Patient158  | Patient235A  |
| 11132 | Patient204  | Patient261E  |
| 11133 | Patient028  | Patient230D  |
| 11133 | Patient028  | Patient230F  |
| 11133 | Patient031  | Patient192E  |
| 11133 | Patient032E | Patient196F  |
| 11133 | Patient034E | Patient204   |
| 11133 | Patient066A | Patient224B  |
| 11133 | Patient081C | Patient263A  |
| 11133 | Patient081D | Patient222C  |
| 11133 | Patient157  | Patient258B  |
| 11133 | Patient157  | Patient258G  |
| 11133 | Patient204  | Patient230A  |
| 11134 | Patient028  | Patient066F  |
| 11134 | Patient028  | Patient230B  |
| 11134 | Patient028  | Patient261A  |
| 11134 | Patient031  | Patient192F  |
| 11134 | Patient038  | Patient090   |
| 11134 | Patient038  | Patient183D  |
| 11134 | Patient045D | Patient261C  |
| 11134 | Patient054  | Patient090   |
| 11134 | Patient066A | Patient183E  |
| 11134 | Patient092D | Patient205   |
| 11134 | Patient093C | Patient258A1 |
| 11134 | Patient093C | Patient258D  |
| 11134 | Patient145C | Patient204   |
| 11134 | Patient157  | Patient258F  |
| 11134 | Patient204  | Patient206   |
| 11134 | Patient205  | Patient241   |
| 11135 | Patient028  | Patient066D  |
| 11135 | Patient028  | Patient066E  |
| 11135 | Patient028  | Patient150A  |
| 11135 | Patient045B | Patient066A  |
| 11135 | Patient092D | Patient210   |
| 11135 | Patient093A | Patient242   |
| 11135 | Patient093D | Patient242   |
| 11135 | Patient157  | Patient258A2 |
| 11136 | Patient028  | Patient123A  |
| 11136 | Patient032E | Patient222C  |
| 11136 | Patient038  | Patient123C  |
| 11136 | Patient038  | Patient126C  |
| 11136 | Patient045C | Patient066A  |
| 11136 | Patient066A | Patient090   |
| 11136 | Patient086B | Patient093B  |
| 11136 | Patient086C | Patient094E  |

|       |              |              |
|-------|--------------|--------------|
| 11136 | Patient093C  | Patient164   |
| 11136 | Patient094B  | Patient242   |
| 11136 | Patient121B  | Patient204   |
| 11136 | Patient204   | Patient261A  |
| 11136 | Patient261G  | Patient263A  |
| 11137 | Patient028   | Patient261E  |
| 11137 | Patient032C  | Patient196F  |
| 11137 | Patient034D  | Patient204   |
| 11137 | Patient086A  | Patient093B  |
| 11137 | Patient092C  | Patient093C  |
| 11137 | Patient093C  | Patient258B  |
| 11137 | Patient093C  | Patient258G  |
| 11137 | Patient093E  | Patient242   |
| 11137 | Patient133   | Patient205   |
| 11137 | Patient167   | Patient204   |
| 11138 | Patient086E  | Patient093B  |
| 11138 | Patient093C  | Patient258F  |
| 11138 | Patient141F  | Patient263A  |
| 11138 | Patient141G  | Patient205   |
| 11138 | Patient145B  | Patient196F  |
| 11138 | Patient145B  | Patient222C  |
| 11139 | Patient028   | Patient145A  |
| 11139 | Patient038   | Patient123B  |
| 11139 | Patient053A1 | Patient232A  |
| 11139 | Patient053A1 | Patient232C  |
| 11139 | Patient066A  | Patient103B  |
| 11139 | Patient081D  | Patient263A  |
| 11139 | Patient093C  | Patient258A2 |
| 11139 | Patient100A  | Patient261E  |
| 11139 | Patient159   | Patient258A1 |
| 11139 | Patient230G  | Patient263A  |
| 11140 | Patient028   | Patient123C  |
| 11140 | Patient028   | Patient261B  |
| 11140 | Patient031   | Patient181B  |
| 11140 | Patient032C  | Patient222C  |
| 11140 | Patient053A1 | Patient232E  |
| 11140 | Patient094C  | Patient242   |
| 11140 | Patient159   | Patient258B  |
| 11140 | Patient159   | Patient258D  |
| 11141 | Patient028   | Patient173B  |
| 11141 | Patient031   | Patient181A  |
| 11141 | Patient034B  | Patient204   |
| 11141 | Patient038   | Patient123D  |
| 11141 | Patient045D  | Patient183A  |
| 11141 | Patient086A  | Patient094A  |
| 11141 | Patient086B  | Patient094A  |
| 11141 | Patient120A  | Patient158   |
| 11141 | Patient141A  | Patient204   |
| 11141 | Patient159   | Patient258F  |
| 11141 | Patient159   | Patient258G  |

|       |              |              |
|-------|--------------|--------------|
| 11142 | Patient026D  | Patient100A  |
| 11142 | Patient028   | Patient258A1 |
| 11142 | Patient038   | Patient183C  |
| 11142 | Patient054   | Patient224B  |
| 11142 | Patient086C  | Patient094C  |
| 11142 | Patient205   | Patient251   |
| 11142 | Patient210   | Patient242   |
| 11143 | Patient007A  | Patient146   |
| 11143 | Patient028   | Patient123B  |
| 11143 | Patient066A  | Patient103C  |
| 11143 | Patient086B  | Patient093D  |
| 11143 | Patient086E  | Patient094A  |
| 11143 | Patient093B  | Patient133   |
| 11143 | Patient159   | Patient258A2 |
| 11143 | Patient204   | Patient230D  |
| 11144 | Patient026F  | Patient038   |
| 11144 | Patient028   | Patient150B  |
| 11144 | Patient028   | Patient258B  |
| 11144 | Patient028   | Patient258G  |
| 11144 | Patient032E  | Patient263A  |
| 11144 | Patient054   | Patient224A  |
| 11144 | Patient066A  | Patient126A  |
| 11144 | Patient086A  | Patient093D  |
| 11144 | Patient086A  | Patient094D  |
| 11144 | Patient086B  | Patient093E  |
| 11144 | Patient086B  | Patient094B  |
| 11144 | Patient086B  | Patient094D  |
| 11144 | Patient141B  | Patient204   |
| 11144 | Patient141C  | Patient204   |
| 11144 | Patient204   | Patient261B  |
| 11145 | Patient028   | Patient183A  |
| 11145 | Patient028   | Patient258D  |
| 11145 | Patient038   | Patient183B  |
| 11145 | Patient038   | Patient183E  |
| 11145 | Patient053A1 | Patient232D  |
| 11145 | Patient054   | Patient181B  |
| 11145 | Patient086A  | Patient093A  |
| 11145 | Patient086A  | Patient093E  |
| 11145 | Patient086A  | Patient094B  |
| 11145 | Patient086B  | Patient093A  |
| 11145 | Patient086E  | Patient093D  |
| 11145 | Patient093D  | Patient133   |
| 11145 | Patient145B  | Patient263A  |
| 11145 | Patient159   | Patient251   |
| 11146 | Patient026D  | Patient028   |
| 11146 | Patient028   | Patient258A2 |
| 11146 | Patient028   | Patient258F  |
| 11146 | Patient028   | Patient261C  |
| 11146 | Patient028   | Patient261D  |
| 11146 | Patient031   | Patient173A  |

|       |              |              |
|-------|--------------|--------------|
| 11146 | Patient031   | Patient224B  |
| 11146 | Patient038   | Patient230C  |
| 11146 | Patient053C  | Patient204   |
| 11146 | Patient054   | Patient181A  |
| 11146 | Patient086E  | Patient093A  |
| 11146 | Patient086E  | Patient093E  |
| 11146 | Patient086E  | Patient094B  |
| 11146 | Patient086E  | Patient094D  |
| 11146 | Patient192D  | Patient205   |
| 11147 | Patient023   | Patient251   |
| 11147 | Patient026E  | Patient100A  |
| 11147 | Patient028   | Patient258E  |
| 11147 | Patient053B  | Patient204   |
| 11147 | Patient066D  | Patient204   |
| 11147 | Patient094A  | Patient133   |
| 11147 | Patient141G  | Patient158   |
| 11147 | Patient196F  | Patient261E  |
| 11147 | Patient204   | Patient230F  |
| 11148 | Patient007B  | Patient146   |
| 11148 | Patient026B  | Patient038   |
| 11148 | Patient028   | Patient126C  |
| 11148 | Patient031   | Patient235C  |
| 11148 | Patient032C  | Patient263A  |
| 11148 | Patient038   | Patient167   |
| 11148 | Patient053A2 | Patient204   |
| 11148 | Patient086B  | Patient094E  |
| 11148 | Patient093B  | Patient258A1 |
| 11148 | Patient094D  | Patient133   |
| 11148 | Patient204   | Patient261C  |
| 11149 | Patient026A  | Patient038   |
| 11149 | Patient028   | Patient123D  |
| 11149 | Patient031   | Patient235B  |
| 11149 | Patient045D  | Patient183D  |
| 11149 | Patient086A  | Patient094E  |
| 11149 | Patient090   | Patient204   |
| 11149 | Patient093A  | Patient133   |
| 11149 | Patient093B  | Patient258D  |
| 11149 | Patient094A  | Patient258A1 |
| 11149 | Patient164   | Patient205   |
| 11149 | Patient204   | Patient230B  |
| 11149 | Patient222C  | Patient261E  |
| 11150 | Patient022B  | Patient066A  |
| 11150 | Patient026E  | Patient028   |
| 11150 | Patient066A  | Patient103A  |
| 11150 | Patient086E  | Patient094E  |
| 11150 | Patient094A  | Patient258D  |
| 11150 | Patient100A  | Patient261C  |
| 11150 | Patient131   | Patient251   |
| 11150 | Patient145A  | Patient204   |
| 11150 | Patient205   | Patient242   |



|       |             |              |
|-------|-------------|--------------|
| 11150 | Patient242  | Patient247D  |
| 11150 | Patient246A | Patient251   |
| 11151 | Patient054  | Patient103B  |
| 11151 | Patient086B | Patient094C  |
| 11151 | Patient092C | Patient093B  |
| 11151 | Patient093B | Patient164   |
| 11151 | Patient093B | Patient258B  |
| 11151 | Patient093B | Patient258G  |
| 11151 | Patient093E | Patient133   |
| 11151 | Patient094B | Patient133   |
| 11151 | Patient133  | Patient189A  |
| 11151 | Patient133  | Patient189B  |
| 11151 | Patient204  | Patient261D  |
| 11152 | Patient026F | Patient028   |
| 11152 | Patient028  | Patient220B  |
| 11152 | Patient086A | Patient094C  |
| 11152 | Patient092C | Patient131   |
| 11152 | Patient093B | Patient258F  |
| 11152 | Patient094A | Patient258B  |
| 11152 | Patient094A | Patient258G  |
| 11152 | Patient161B | Patient196F  |
| 11153 | Patient031  | Patient120B  |
| 11153 | Patient038  | Patient176   |
| 11153 | Patient045D | Patient183C  |
| 11153 | Patient054  | Patient103C  |
| 11153 | Patient086E | Patient094C  |
| 11153 | Patient092C | Patient094A  |
| 11153 | Patient093B | Patient258A2 |
| 11153 | Patient094C | Patient133   |
| 11153 | Patient094D | Patient258A1 |
| 11153 | Patient094E | Patient133   |
| 11153 | Patient133  | Patient189E  |
| 11153 | Patient161B | Patient222C  |
| 11153 | Patient204  | Patient230E  |
| 11154 | Patient026B | Patient028   |
| 11154 | Patient038  | Patient081C  |
| 11154 | Patient090  | Patient093C  |
| 11154 | Patient094A | Patient258A2 |
| 11154 | Patient094A | Patient258F  |
| 11154 | Patient094D | Patient258D  |
| 11154 | Patient133  | Patient210   |
| 11154 | Patient150C | Patient196F  |
| 11154 | Patient164  | Patient210   |
| 11154 | Patient196F | Patient230D  |
| 11154 | Patient205  | Patient230C  |
| 11154 | Patient210  | Patient235A  |
| 11154 | Patient247D | Patient258A1 |
| 11155 | Patient026A | Patient028   |
| 11155 | Patient028  | Patient183D  |
| 11155 | Patient031  | Patient120D  |

|       |             |              |
|-------|-------------|--------------|
| 11155 | Patient032E | Patient038   |
| 11155 | Patient038  | Patient230G  |
| 11155 | Patient093A | Patient258A1 |
| 11155 | Patient093A | Patient258D  |
| 11155 | Patient093C | Patient192D  |
| 11155 | Patient093C | Patient251   |
| 11155 | Patient093D | Patient258A1 |
| 11155 | Patient093D | Patient258D  |
| 11155 | Patient094D | Patient164   |
| 11155 | Patient150C | Patient222C  |
| 11155 | Patient222C | Patient230D  |
| 11155 | Patient247D | Patient258D  |
| 11156 | Patient026C | Patient028   |
| 11156 | Patient038  | Patient141F  |
| 11156 | Patient094A | Patient164   |
| 11156 | Patient094D | Patient258B  |
| 11156 | Patient094D | Patient258G  |
| 11156 | Patient133  | Patient247D  |
| 11156 | Patient161B | Patient204   |
| 11156 | Patient247A | Patient251   |
| 11156 | Patient247D | Patient258B  |
| 11156 | Patient261E | Patient263A  |
| 11157 | Patient028  | Patient045A  |
| 11157 | Patient038  | Patient145B  |
| 11157 | Patient054  | Patient103A  |
| 11157 | Patient066E | Patient204   |
| 11157 | Patient066F | Patient204   |
| 11157 | Patient092C | Patient094D  |
| 11157 | Patient093C | Patient258E  |
| 11157 | Patient093E | Patient258A1 |
| 11157 | Patient093E | Patient258D  |
| 11157 | Patient094B | Patient258A1 |
| 11157 | Patient094B | Patient258D  |
| 11157 | Patient247D | Patient258F  |
| 11157 | Patient247D | Patient258G  |
| 11158 | Patient026D | Patient196F  |
| 11158 | Patient028  | Patient045C  |
| 11158 | Patient031  | Patient120C  |
| 11158 | Patient045D | Patient183B  |
| 11158 | Patient045D | Patient183E  |
| 11158 | Patient092C | Patient093A  |
| 11158 | Patient093A | Patient258B  |
| 11158 | Patient093A | Patient258G  |
| 11158 | Patient093D | Patient258B  |
| 11158 | Patient093D | Patient258G  |
| 11158 | Patient094D | Patient258A2 |
| 11158 | Patient094D | Patient258F  |
| 11158 | Patient094E | Patient258A1 |
| 11158 | Patient094E | Patient258D  |
| 11158 | Patient121A | Patient158   |

|       |             |              |
|-------|-------------|--------------|
| 11158 | Patient121B | Patient158   |
| 11158 | Patient133  | Patient158   |
| 11158 | Patient141G | Patient210   |
| 11158 | Patient205  | Patient261G  |
| 11158 | Patient247B | Patient251   |
| 11158 | Patient247C | Patient251   |
| 11158 | Patient247D | Patient258A2 |
| 11159 | Patient028  | Patient183C  |
| 11159 | Patient031  | Patient103A  |
| 11159 | Patient038  | Patient081D  |
| 11159 | Patient038  | Patient161B  |
| 11159 | Patient092C | Patient093D  |
| 11159 | Patient093A | Patient258F  |
| 11159 | Patient093D | Patient258F  |
| 11159 | Patient150A | Patient196F  |
| 11159 | Patient196F | Patient261C  |
| 11160 | Patient026C | Patient093C  |
| 11160 | Patient028  | Patient045B  |
| 11160 | Patient081B | Patient205   |
| 11160 | Patient081E | Patient205   |
| 11160 | Patient093C | Patient207   |
| 11160 | Patient093D | Patient258A2 |
| 11160 | Patient093E | Patient258B  |
| 11160 | Patient093E | Patient258G  |
| 11160 | Patient094B | Patient258B  |
| 11160 | Patient094B | Patient258G  |
| 11160 | Patient150A | Patient222C  |
| 11160 | Patient222C | Patient258A1 |
| 11160 | Patient222C | Patient258D  |
| 11161 | Patient026D | Patient222C  |
| 11161 | Patient028  | Patient217A  |
| 11161 | Patient028  | Patient217C  |
| 11161 | Patient031  | Patient195   |
| 11161 | Patient038  | Patient081E  |
| 11161 | Patient081C | Patient205   |
| 11161 | Patient081F | Patient205   |
| 11161 | Patient093A | Patient258A2 |
| 11161 | Patient093E | Patient258F  |
| 11161 | Patient094B | Patient258F  |
| 11161 | Patient094E | Patient164   |
| 11161 | Patient094E | Patient258B  |
| 11161 | Patient094E | Patient258G  |
| 11161 | Patient161B | Patient263A  |
| 11161 | Patient196F | Patient258A1 |
| 11161 | Patient196F | Patient258D  |
| 11161 | Patient222C | Patient261C  |
| 11162 | Patient026E | Patient196F  |
| 11162 | Patient028  | Patient217B  |
| 11162 | Patient028  | Patient217E  |
| 11162 | Patient028  | Patient217F  |

|       |              |              |
|-------|--------------|--------------|
| 11162 | Patient028   | Patient217H  |
| 11162 | Patient028   | Patient217I  |
| 11162 | Patient038   | Patient261E  |
| 11162 | Patient038   | Patient261G  |
| 11162 | Patient090   | Patient104A  |
| 11162 | Patient090   | Patient104B  |
| 11162 | Patient092C  | Patient093E  |
| 11162 | Patient092C  | Patient094B  |
| 11162 | Patient092C  | Patient094E  |
| 11162 | Patient093C  | Patient167   |
| 11162 | Patient093E  | Patient258A2 |
| 11162 | Patient094B  | Patient258A2 |
| 11162 | Patient094E  | Patient258F  |
| 11162 | Patient164   | Patient189A  |
| 11162 | Patient183A  | Patient196F  |
| 11162 | Patient210   | Patient241   |
| 11162 | Patient230D  | Patient263A  |
| 11163 | Patient028   | Patient183B  |
| 11163 | Patient028   | Patient183E  |
| 11163 | Patient028   | Patient217D  |
| 11163 | Patient032E  | Patient205   |
| 11163 | Patient075   | Patient120B  |
| 11163 | Patient081A2 | Patient205   |
| 11163 | Patient086C  | Patient131   |
| 11163 | Patient093D  | Patient164   |
| 11163 | Patient094C  | Patient258A1 |
| 11163 | Patient094C  | Patient258D  |
| 11163 | Patient094E  | Patient258A2 |
| 11163 | Patient100A  | Patient183A  |
| 11163 | Patient150C  | Patient263A  |
| 11163 | Patient222C  | Patient258B  |
| 11163 | Patient222C  | Patient258G  |
| 11164 | Patient026E  | Patient222C  |
| 11164 | Patient032B  | Patient205   |
| 11164 | Patient038   | Patient173B  |
| 11164 | Patient053A1 | Patient100A  |
| 11164 | Patient066A  | Patient092H  |
| 11164 | Patient066A  | Patient192A  |
| 11164 | Patient081D  | Patient205   |
| 11164 | Patient141F  | Patient205   |
| 11164 | Patient158   | Patient164   |
| 11164 | Patient158   | Patient173B  |
| 11164 | Patient164   | Patient189E  |
| 11164 | Patient183A  | Patient222C  |
| 11164 | Patient196F  | Patient258B  |
| 11164 | Patient196F  | Patient258G  |
| 11164 | Patient205   | Patient230G  |
| 11164 | Patient222C  | Patient258F  |
| 11165 | Patient032C  | Patient038   |
| 11165 | Patient038   | Patient081B  |

|       |              |              |
|-------|--------------|--------------|
| 11165 | Patient038   | Patient081F  |
| 11165 | Patient038   | Patient261A  |
| 11165 | Patient054   | Patient207   |
| 11165 | Patient094C  | Patient258B  |
| 11165 | Patient094C  | Patient258G  |
| 11165 | Patient164   | Patient189B  |
| 11165 | Patient196F  | Patient258F  |
| 11165 | Patient222C  | Patient258A2 |
| 11166 | Patient032B  | Patient038   |
| 11166 | Patient038   | Patient192A  |
| 11166 | Patient038   | Patient192C  |
| 11166 | Patient092C  | Patient094C  |
| 11166 | Patient094C  | Patient258F  |
| 11166 | Patient196F  | Patient258A2 |
| 11167 | Patient066A  | Patient092G  |
| 11167 | Patient075   | Patient120C  |
| 11167 | Patient075   | Patient120D  |
| 11167 | Patient094C  | Patient258A2 |
| 11167 | Patient247E  | Patient251   |
| 11168 | Patient038   | Patient081A2 |
| 11168 | Patient038   | Patient207   |
| 11168 | Patient054   | Patient173A  |
| 11168 | Patient066A  | Patient192C  |
| 11168 | Patient093A  | Patient164   |
| 11168 | Patient094B  | Patient164   |
| 11168 | Patient150A  | Patient263A  |
| 11168 | Patient261C  | Patient263A  |
| 11169 | Patient026D  | Patient263A  |
| 11169 | Patient090   | Patient093B  |
| 11169 | Patient093B  | Patient192D  |
| 11169 | Patient093E  | Patient164   |
| 11169 | Patient150B  | Patient196F  |
| 11169 | Patient258A1 | Patient263A  |
| 11169 | Patient258D  | Patient263A  |
| 11170 | Patient045A  | Patient196F  |
| 11170 | Patient066A  | Patient192B  |
| 11170 | Patient081A1 | Patient205   |
| 11170 | Patient093B  | Patient251   |
| 11170 | Patient126D  | Patient133   |
| 11170 | Patient133   | Patient213B  |
| 11170 | Patient145B  | Patient205   |
| 11170 | Patient150B  | Patient222C  |
| 11170 | Patient158   | Patient230C  |
| 11170 | Patient173B  | Patient210   |
| 11170 | Patient205   | Patient235A  |
| 11171 | Patient028   | Patient217J  |
| 11171 | Patient031   | Patient224A  |
| 11171 | Patient038   | Patient192B  |
| 11171 | Patient093B  | Patient258E  |
| 11171 | Patient094A  | Patient192D  |

|       |              |              |
|-------|--------------|--------------|
| 11171 | Patient100A  | Patient183D  |
| 11171 | Patient141D  | Patient205   |
| 11171 | Patient157   | Patient241   |
| 11171 | Patient176   | Patient205   |
| 11171 | Patient183D  | Patient196F  |
| 11171 | Patient241   | Patient246A  |
| 11172 | Patient031   | Patient074B  |
| 11172 | Patient031   | Patient074C  |
| 11172 | Patient032A  | Patient038   |
| 11172 | Patient032A  | Patient205   |
| 11172 | Patient038   | Patient081A1 |
| 11172 | Patient038   | Patient261B  |
| 11172 | Patient093C  | Patient217A  |
| 11172 | Patient093C  | Patient241   |
| 11172 | Patient094A  | Patient258E  |
| 11172 | Patient094C  | Patient164   |
| 11172 | Patient141F  | Patient158   |
| 11172 | Patient183D  | Patient222C  |
| 11172 | Patient220B  | Patient222C  |
| 11172 | Patient258B  | Patient263A  |
| 11172 | Patient258G  | Patient263A  |
| 11173 | Patient026E  | Patient263A  |
| 11173 | Patient032C  | Patient205   |
| 11173 | Patient038   | Patient092H  |
| 11173 | Patient038   | Patient141D  |
| 11173 | Patient090   | Patient093D  |
| 11173 | Patient183A  | Patient263A  |
| 11173 | Patient210   | Patient230C  |
| 11173 | Patient258F  | Patient263A  |
| 11174 | Patient026C  | Patient093B  |
| 11174 | Patient026D  | Patient204   |
| 11174 | Patient031   | Patient074A  |
| 11174 | Patient031   | Patient074D  |
| 11174 | Patient045A  | Patient222C  |
| 11174 | Patient086B  | Patient131   |
| 11174 | Patient090   | Patient094A  |
| 11174 | Patient093C  | Patient217C  |
| 11174 | Patient258A2 | Patient263A  |
| 11175 | Patient034C  | Patient205   |
| 11175 | Patient066A  | Patient092E  |
| 11175 | Patient066A  | Patient213A  |
| 11175 | Patient086A  | Patient131   |
| 11175 | Patient093B  | Patient207   |
| 11175 | Patient093C  | Patient217B  |
| 11175 | Patient093C  | Patient217E  |
| 11175 | Patient093C  | Patient217F  |
| 11175 | Patient093C  | Patient217H  |
| 11175 | Patient093C  | Patient217I  |
| 11176 | Patient038   | Patient092G  |
| 11176 | Patient038   | Patient141A  |

|       |             |              |
|-------|-------------|--------------|
| 11176 | Patient038  | Patient141C  |
| 11176 | Patient038  | Patient145C  |
| 11176 | Patient045B | Patient196F  |
| 11176 | Patient045C | Patient196F  |
| 11176 | Patient045D | Patient164   |
| 11176 | Patient053C | Patient158   |
| 11176 | Patient086E | Patient131   |
| 11176 | Patient090  | Patient093A  |
| 11176 | Patient090  | Patient094B  |
| 11176 | Patient093A | Patient192D  |
| 11176 | Patient093B | Patient167   |
| 11176 | Patient093C | Patient217D  |
| 11176 | Patient094D | Patient192D  |
| 11176 | Patient094D | Patient258E  |
| 11176 | Patient100A | Patient183C  |
| 11176 | Patient133  | Patient252D  |
| 11176 | Patient183C | Patient196F  |
| 11177 | Patient026C | Patient094A  |
| 11177 | Patient034A | Patient038   |
| 11177 | Patient034A | Patient205   |
| 11177 | Patient053B | Patient158   |
| 11177 | Patient066A | Patient092A  |
| 11177 | Patient090  | Patient093E  |
| 11177 | Patient090  | Patient094D  |
| 11177 | Patient093D | Patient192D  |
| 11177 | Patient094D | Patient251   |
| 11177 | Patient158  | Patient230G  |
| 11177 | Patient205  | Patient261E  |
| 11177 | Patient213B | Patient258A1 |
| 11178 | Patient034E | Patient038   |
| 11178 | Patient038  | Patient261C  |
| 11178 | Patient086C | Patient126E  |
| 11178 | Patient090  | Patient094C  |
| 11178 | Patient093A | Patient258E  |
| 11178 | Patient093E | Patient192D  |
| 11178 | Patient094B | Patient192D  |
| 11178 | Patient104B | Patient207   |
| 11178 | Patient121B | Patient205   |
| 11178 | Patient150B | Patient263A  |
| 11178 | Patient167  | Patient205   |
| 11178 | Patient183C | Patient222C  |
| 11178 | Patient196F | Patient220B  |
| 11178 | Patient205  | Patient230A  |
| 11178 | Patient213B | Patient258D  |
| 11179 | Patient034C | Patient038   |
| 11179 | Patient034E | Patient205   |
| 11179 | Patient038  | Patient141B  |
| 11179 | Patient038  | Patient192E  |
| 11179 | Patient038  | Patient230A  |
| 11179 | Patient045C | Patient222C  |

|       |              |             |
|-------|--------------|-------------|
| 11179 | Patient053A2 | Patient158  |
| 11179 | Patient066A  | Patient177  |
| 11179 | Patient081E  | Patient210  |
| 11179 | Patient090   | Patient094E |
| 11179 | Patient092C  | Patient126D |
| 11179 | Patient093D  | Patient167  |
| 11179 | Patient093D  | Patient258E |
| 11179 | Patient094A  | Patient167  |
| 11179 | Patient094A  | Patient207  |
| 11179 | Patient158   | Patient173A |
| 11179 | Patient158   | Patient261G |
| 11179 | Patient173B  | Patient204  |
| 11179 | Patient183D  | Patient263A |
| 11180 | Patient026E  | Patient204  |
| 11180 | Patient028   | Patient192C |
| 11180 | Patient028   | Patient192D |
| 11180 | Patient031   | Patient103B |
| 11180 | Patient034D  | Patient205  |
| 11180 | Patient038   | Patient261D |
| 11180 | Patient045B  | Patient222C |
| 11180 | Patient066A  | Patient092B |
| 11180 | Patient093E  | Patient258E |
| 11180 | Patient094B  | Patient258E |
| 11180 | Patient097A  | Patient133  |
| 11180 | Patient097E  | Patient133  |
| 11180 | Patient100A  | Patient183B |
| 11180 | Patient104A  | Patient207  |
| 11180 | Patient104B  | Patient133  |
| 11180 | Patient145C  | Patient205  |
| 11180 | Patient176   | Patient247D |
| 11180 | Patient183B  | Patient196F |
| 11180 | Patient183E  | Patient196F |
| 11180 | Patient205   | Patient206  |
| 11180 | Patient213B  | Patient258B |
| 11181 | Patient026C  | Patient093A |
| 11181 | Patient045A  | Patient263A |
| 11181 | Patient081C  | Patient158  |
| 11181 | Patient090   | Patient189A |
| 11181 | Patient090   | Patient189B |
| 11181 | Patient094E  | Patient192D |
| 11181 | Patient094E  | Patient258E |
| 11181 | Patient100A  | Patient183E |
| 11181 | Patient104A  | Patient133  |
| 11181 | Patient121A  | Patient210  |
| 11181 | Patient123A  | Patient204  |
| 11181 | Patient205   | Patient261A |
| 11181 | Patient213B  | Patient258F |
| 11181 | Patient213B  | Patient258G |
| 11182 | Patient026C  | Patient093D |
| 11182 | Patient026C  | Patient094D |



|       |             |              |
|-------|-------------|--------------|
| 11182 | Patient031  | Patient103C  |
| 11182 | Patient032E | Patient210   |
| 11182 | Patient034D | Patient038   |
| 11182 | Patient038  | Patient235F  |
| 11182 | Patient066A | Patient192E  |
| 11182 | Patient093A | Patient167   |
| 11182 | Patient093C | Patient217J  |
| 11182 | Patient094E | Patient251   |
| 11182 | Patient121B | Patient210   |
| 11182 | Patient133  | Patient252B  |
| 11182 | Patient141D | Patient158   |
| 11182 | Patient164  | Patient247D  |
| 11182 | Patient183A | Patient204   |
| 11182 | Patient183B | Patient222C  |
| 11182 | Patient183E | Patient222C  |
| 11182 | Patient210  | Patient230G  |
| 11182 | Patient241  | Patient247B  |
| 11182 | Patient241  | Patient247C  |
| 11183 | Patient026C | Patient093E  |
| 11183 | Patient026C | Patient094B  |
| 11183 | Patient028  | Patient192A  |
| 11183 | Patient031  | Patient074E  |
| 11183 | Patient032E | Patient158   |
| 11183 | Patient038  | Patient235C  |
| 11183 | Patient081B | Patient210   |
| 11183 | Patient081C | Patient210   |
| 11183 | Patient081E | Patient158   |
| 11183 | Patient081F | Patient210   |
| 11183 | Patient086C | Patient126D  |
| 11183 | Patient090  | Patient189E  |
| 11183 | Patient093E | Patient207   |
| 11183 | Patient094B | Patient207   |
| 11183 | Patient094C | Patient192D  |
| 11183 | Patient094D | Patient167   |
| 11183 | Patient094D | Patient207   |
| 11183 | Patient104B | Patient258A1 |
| 11183 | Patient104B | Patient258D  |
| 11183 | Patient141F | Patient210   |
| 11183 | Patient213B | Patient258A2 |
| 11183 | Patient220B | Patient263A  |
| 11183 | Patient241  | Patient247A  |
| 11184 | Patient028  | Patient092H  |
| 11184 | Patient028  | Patient235F  |
| 11184 | Patient032B | Patient158   |
| 11184 | Patient038  | Patient092E  |
| 11184 | Patient038  | Patient126A  |
| 11184 | Patient038  | Patient230D  |
| 11184 | Patient038  | Patient235E  |
| 11184 | Patient093A | Patient207   |
| 11184 | Patient093E | Patient167   |

|       |              |              |
|-------|--------------|--------------|
| 11184 | Patient094B  | Patient167   |
| 11184 | Patient133   | Patient252A  |
| 11184 | Patient145B  | Patient158   |
| 11184 | Patient158   | Patient167   |
| 11184 | Patient167   | Patient210   |
| 11185 | Patient023   | Patient092C  |
| 11185 | Patient028   | Patient235C  |
| 11185 | Patient032B  | Patient210   |
| 11185 | Patient034B  | Patient038   |
| 11185 | Patient038   | Patient092A  |
| 11185 | Patient038   | Patient213A  |
| 11185 | Patient079C  | Patient133   |
| 11185 | Patient094C  | Patient167   |
| 11185 | Patient094C  | Patient258E  |
| 11185 | Patient133   | Patient159   |
| 11185 | Patient145B  | Patient210   |
| 11185 | Patient167   | Patient189A  |
| 11185 | Patient167   | Patient189B  |
| 11185 | Patient183C  | Patient263A  |
| 11185 | Patient189B  | Patient220B  |
| 11186 | Patient026C  | Patient094E  |
| 11186 | Patient028   | Patient192B  |
| 11186 | Patient032C  | Patient210   |
| 11186 | Patient038   | Patient066D  |
| 11186 | Patient081A2 | Patient210   |
| 11186 | Patient090   | Patient247D  |
| 11186 | Patient093B  | Patient217A  |
| 11186 | Patient094E  | Patient167   |
| 11186 | Patient097A  | Patient251   |
| 11186 | Patient097E  | Patient251   |
| 11186 | Patient099E  | Patient133   |
| 11186 | Patient100A  | Patient206   |
| 11186 | Patient104B  | Patient258B  |
| 11186 | Patient104B  | Patient258G  |
| 11186 | Patient123C  | Patient204   |
| 11186 | Patient133   | Patient252F  |
| 11186 | Patient141A  | Patient205   |
| 11186 | Patient167   | Patient189E  |
| 11186 | Patient189A  | Patient220B  |
| 11186 | Patient252D  | Patient258A1 |
| 11187 | Patient032D  | Patient146   |
| 11187 | Patient034B  | Patient205   |
| 11187 | Patient038   | Patient230E  |
| 11187 | Patient038   | Patient230F  |
| 11187 | Patient045B  | Patient263A  |
| 11187 | Patient045C  | Patient263A  |
| 11187 | Patient081D  | Patient158   |
| 11187 | Patient081F  | Patient158   |
| 11187 | Patient090   | Patient252B  |
| 11187 | Patient093B  | Patient241   |

|       |              |              |
|-------|--------------|--------------|
| 11187 | Patient094A  | Patient176   |
| 11187 | Patient094E  | Patient207   |
| 11187 | Patient104A  | Patient258A1 |
| 11187 | Patient104A  | Patient258D  |
| 11187 | Patient104B  | Patient258F  |
| 11187 | Patient133   | Patient222B  |
| 11187 | Patient141C  | Patient205   |
| 11187 | Patient183B  | Patient263A  |
| 11188 | Patient026C  | Patient094C  |
| 11188 | Patient026D  | Patient158   |
| 11188 | Patient028   | Patient235E  |
| 11188 | Patient032C  | Patient158   |
| 11188 | Patient053C  | Patient205   |
| 11188 | Patient079A1 | Patient133   |
| 11188 | Patient079A2 | Patient133   |
| 11188 | Patient081B  | Patient158   |
| 11188 | Patient081D  | Patient210   |
| 11188 | Patient093B  | Patient217C  |
| 11188 | Patient093D  | Patient207   |
| 11188 | Patient097D  | Patient133   |
| 11188 | Patient104B  | Patient258A2 |
| 11188 | Patient123B  | Patient204   |
| 11188 | Patient141B  | Patient205   |
| 11188 | Patient164   | Patient213B  |
| 11188 | Patient189E  | Patient220B  |
| 11188 | Patient252D  | Patient258B  |
| 11188 | Patient252D  | Patient258D  |
| 11188 | Patient252D  | Patient258G  |
| 11189 | Patient026F  | Patient204   |
| 11189 | Patient038   | Patient092B  |
| 11189 | Patient038   | Patient235B  |
| 11189 | Patient045A  | Patient204   |
| 11189 | Patient053B  | Patient205   |
| 11189 | Patient053C  | Patient210   |
| 11189 | Patient090   | Patient252A  |
| 11189 | Patient093B  | Patient217B  |
| 11189 | Patient093B  | Patient217E  |
| 11189 | Patient093B  | Patient217F  |
| 11189 | Patient093B  | Patient217H  |
| 11189 | Patient093B  | Patient217I  |
| 11189 | Patient093D  | Patient176   |
| 11189 | Patient094A  | Patient217A  |
| 11189 | Patient097C  | Patient133   |
| 11189 | Patient133   | Patient218A  |
| 11189 | Patient133   | Patient220A  |
| 11189 | Patient173A  | Patient204   |
| 11189 | Patient181B  | Patient204   |
| 11189 | Patient183D  | Patient204   |
| 11189 | Patient183E  | Patient263A  |
| 11189 | Patient205   | Patient230D  |

|       |              |              |
|-------|--------------|--------------|
| 11189 | Patient205   | Patient261B  |
| 11189 | Patient206   | Patient210   |
| 11189 | Patient252D  | Patient258F  |
| 11190 | Patient028   | Patient192E  |
| 11190 | Patient053A2 | Patient205   |
| 11190 | Patient066A  | Patient192F  |
| 11190 | Patient081A2 | Patient158   |
| 11190 | Patient086B  | Patient126E  |
| 11190 | Patient093B  | Patient217D  |
| 11190 | Patient097B  | Patient133   |
| 11190 | Patient104A  | Patient258B  |
| 11190 | Patient104A  | Patient258G  |
| 11190 | Patient131   | Patient207   |
| 11190 | Patient133   | Patient236B  |
| 11190 | Patient145C  | Patient210   |
| 11190 | Patient205   | Patient230F  |
| 11190 | Patient252D  | Patient258A2 |
| 11191 | Patient028   | Patient235B  |
| 11191 | Patient038   | Patient120A  |
| 11191 | Patient038   | Patient192F  |
| 11191 | Patient053A2 | Patient210   |
| 11191 | Patient053B  | Patient210   |
| 11191 | Patient081A1 | Patient210   |
| 11191 | Patient086A  | Patient126E  |
| 11191 | Patient090   | Patient205   |
| 11191 | Patient094A  | Patient217C  |
| 11191 | Patient094C  | Patient207   |
| 11191 | Patient104A  | Patient258F  |
| 11191 | Patient123D  | Patient204   |
| 11191 | Patient158   | Patient261A  |
| 11191 | Patient164   | Patient252D  |
| 11191 | Patient167   | Patient247D  |
| 11191 | Patient210   | Patient261G  |
| 11191 | Patient213B  | Patient251   |
| 11191 | Patient220A  | Patient258A1 |
| 11191 | Patient220A  | Patient258D  |
| 11192 | Patient028   | Patient235A  |
| 11192 | Patient038   | Patient145A  |
| 11192 | Patient045D  | Patient251   |
| 11192 | Patient054   | Patient120A  |
| 11192 | Patient066A  | Patient235C  |
| 11192 | Patient066D  | Patient205   |
| 11192 | Patient086E  | Patient126E  |
| 11192 | Patient094A  | Patient217B  |
| 11192 | Patient094A  | Patient217E  |
| 11192 | Patient094A  | Patient217F  |
| 11192 | Patient094A  | Patient217H  |
| 11192 | Patient094A  | Patient217I  |
| 11192 | Patient094B  | Patient176   |
| 11192 | Patient104A  | Patient258A2 |

|       |              |              |
|-------|--------------|--------------|
| 11192 | Patient181A  | Patient204   |
| 11193 | Patient026E  | Patient158   |
| 11193 | Patient032A  | Patient158   |
| 11193 | Patient038   | Patient230B  |
| 11193 | Patient045B  | Patient204   |
| 11193 | Patient093A  | Patient176   |
| 11193 | Patient094A  | Patient217D  |
| 11193 | Patient094D  | Patient217A  |
| 11193 | Patient108B2 | Patient133   |
| 11193 | Patient120A  | Patient204   |
| 11193 | Patient141A  | Patient158   |
| 11193 | Patient141C  | Patient158   |
| 11193 | Patient150C  | Patient204   |
| 11193 | Patient204   | Patient224B  |
| 11193 | Patient205   | Patient261C  |
| 11193 | Patient236B  | Patient258A1 |
| 11193 | Patient236B  | Patient258D  |
| 11193 | Patient251   | Patient252D  |
| 11194 | Patient021A2 | Patient133   |
| 11194 | Patient026A  | Patient204   |
| 11194 | Patient093A  | Patient217A  |
| 11194 | Patient093E  | Patient176   |
| 11194 | Patient099E  | Patient258A1 |
| 11194 | Patient108B1 | Patient133   |
| 11194 | Patient109C  | Patient133   |
| 11194 | Patient126E  | Patient133   |
| 11194 | Patient141B  | Patient158   |
| 11194 | Patient158   | Patient230A  |
| 11194 | Patient158   | Patient261E  |
| 11194 | Patient205   | Patient230B  |
| 11194 | Patient207   | Patient247D  |
| 11194 | Patient207   | Patient252B  |
| 11194 | Patient210   | Patient261E  |
| 11194 | Patient220A  | Patient258B  |
| 11194 | Patient220A  | Patient258G  |
| 11194 | Patient242   | Patient246A  |
| 11195 | Patient045C  | Patient204   |
| 11195 | Patient066A  | Patient235F  |
| 11195 | Patient081A1 | Patient158   |
| 11195 | Patient090   | Patient213B  |
| 11195 | Patient090   | Patient252F  |
| 11195 | Patient093C  | Patient242   |
| 11195 | Patient093D  | Patient217A  |
| 11195 | Patient094D  | Patient217C  |
| 11195 | Patient094D  | Patient241   |
| 11195 | Patient104B  | Patient164   |
| 11195 | Patient108A  | Patient133   |
| 11195 | Patient108G  | Patient133   |
| 11195 | Patient109E  | Patient133   |
| 11195 | Patient133   | Patient218B  |

|       |              |              |
|-------|--------------|--------------|
| 11195 | Patient145C  | Patient158   |
| 11195 | Patient150A  | Patient204   |
| 11195 | Patient157   | Patient242   |
| 11195 | Patient207   | Patient252A  |
| 11195 | Patient220A  | Patient258F  |
| 11196 | Patient021A1 | Patient133   |
| 11196 | Patient028   | Patient092A  |
| 11196 | Patient028   | Patient092E  |
| 11196 | Patient032A  | Patient210   |
| 11196 | Patient034A  | Patient158   |
| 11196 | Patient038   | Patient066E  |
| 11196 | Patient038   | Patient066F  |
| 11196 | Patient066A  | Patient235B  |
| 11196 | Patient086A  | Patient126D  |
| 11196 | Patient086B  | Patient126D  |
| 11196 | Patient092D  | Patient093C  |
| 11196 | Patient093A  | Patient217C  |
| 11196 | Patient093B  | Patient217J  |
| 11196 | Patient093E  | Patient217A  |
| 11196 | Patient094B  | Patient217A  |
| 11196 | Patient094D  | Patient217B  |
| 11196 | Patient094D  | Patient217E  |
| 11196 | Patient094D  | Patient217F  |
| 11196 | Patient094D  | Patient217H  |
| 11196 | Patient094D  | Patient217I  |
| 11196 | Patient097C  | Patient251   |
| 11196 | Patient099E  | Patient258B  |
| 11196 | Patient099E  | Patient258D  |
| 11196 | Patient145A  | Patient205   |
| 11196 | Patient161B  | Patient210   |
| 11196 | Patient183C  | Patient204   |
| 11196 | Patient205   | Patient261D  |
| 11196 | Patient220A  | Patient258A2 |
| 11196 | Patient236B  | Patient258B  |
| 11196 | Patient236B  | Patient258G  |
| 11197 | Patient034C  | Patient158   |
| 11197 | Patient034E  | Patient158   |
| 11197 | Patient038   | Patient177   |
| 11197 | Patient066A  | Patient235E  |
| 11197 | Patient079B  | Patient133   |
| 11197 | Patient093A  | Patient217B  |
| 11197 | Patient093A  | Patient217E  |
| 11197 | Patient093A  | Patient217F  |
| 11197 | Patient093A  | Patient217H  |
| 11197 | Patient093A  | Patient217I  |
| 11197 | Patient093D  | Patient217B  |
| 11197 | Patient093D  | Patient217C  |
| 11197 | Patient094D  | Patient217D  |
| 11197 | Patient099A  | Patient133   |
| 11197 | Patient099B  | Patient133   |

|       |             |              |
|-------|-------------|--------------|
| 11197 | Patient099E | Patient258F  |
| 11197 | Patient099E | Patient258G  |
| 11197 | Patient109D | Patient133   |
| 11197 | Patient133  | Patient187   |
| 11197 | Patient133  | Patient222A  |
| 11197 | Patient161B | Patient205   |
| 11197 | Patient236B | Patient251   |
| 11197 | Patient236B | Patient258F  |
| 11198 | Patient026B | Patient204   |
| 11198 | Patient086E | Patient126D  |
| 11198 | Patient093A | Patient217D  |
| 11198 | Patient093D | Patient217D  |
| 11198 | Patient093D | Patient217E  |
| 11198 | Patient093D | Patient217F  |
| 11198 | Patient093D | Patient217I  |
| 11198 | Patient093E | Patient217C  |
| 11198 | Patient094B | Patient217C  |
| 11198 | Patient094C | Patient176   |
| 11198 | Patient094E | Patient217A  |
| 11198 | Patient094E | Patient241   |
| 11198 | Patient108H | Patient133   |
| 11198 | Patient126E | Patient258A1 |
| 11198 | Patient126E | Patient258D  |
| 11198 | Patient141D | Patient210   |
| 11198 | Patient183B | Patient204   |
| 11198 | Patient205  | Patient230E  |
| 11198 | Patient236B | Patient258A2 |
| 11199 | Patient028  | Patient206   |
| 11199 | Patient034A | Patient210   |
| 11199 | Patient066A | Patient103D  |
| 11199 | Patient090  | Patient252D  |
| 11199 | Patient093D | Patient217H  |
| 11199 | Patient093E | Patient217B  |
| 11199 | Patient093E | Patient217F  |
| 11199 | Patient093E | Patient217H  |
| 11199 | Patient093E | Patient217I  |
| 11199 | Patient094A | Patient217J  |
| 11199 | Patient094B | Patient217B  |
| 11199 | Patient094B | Patient217E  |
| 11199 | Patient094B | Patient217F  |
| 11199 | Patient094B | Patient217H  |
| 11199 | Patient094B | Patient217I  |
| 11199 | Patient099E | Patient258A2 |
| 11199 | Patient133  | Patient236A  |
| 11199 | Patient141A | Patient210   |
| 11199 | Patient210  | Patient261A  |
| 11199 | Patient218A | Patient258A1 |
| 11199 | Patient218A | Patient258D  |
| 11200 | Patient034D | Patient158   |
| 11200 | Patient034E | Patient210   |

|       |             |              |
|-------|-------------|--------------|
| 11200 | Patient086C | Patient232B  |
| 11200 | Patient093E | Patient217D  |
| 11200 | Patient093E | Patient217E  |
| 11200 | Patient094B | Patient217D  |
| 11200 | Patient094E | Patient217C  |
| 11200 | Patient097D | Patient251   |
| 11200 | Patient109B | Patient133   |
| 11200 | Patient126C | Patient204   |
| 11200 | Patient183E | Patient204   |
| 11200 | Patient241  | Patient247E  |
| 11201 | Patient034C | Patient210   |
| 11201 | Patient066F | Patient205   |
| 11201 | Patient094E | Patient217B  |
| 11201 | Patient094E | Patient217E  |
| 11201 | Patient094E | Patient217F  |
| 11201 | Patient094E | Patient217H  |
| 11201 | Patient094E | Patient217I  |
| 11201 | Patient104A | Patient164   |
| 11201 | Patient104B | Patient251   |
| 11201 | Patient123A | Patient158   |
| 11201 | Patient126E | Patient258B  |
| 11201 | Patient126E | Patient258G  |
| 11201 | Patient141C | Patient210   |
| 11201 | Patient158  | Patient176   |
| 11201 | Patient158  | Patient230D  |
| 11201 | Patient159  | Patient164   |
| 11201 | Patient210  | Patient230E  |
| 11201 | Patient218A | Patient258B  |
| 11202 | Patient031  | Patient103D  |
| 11202 | Patient086C | Patient232A  |
| 11202 | Patient086C | Patient232C  |
| 11202 | Patient092C | Patient126E  |
| 11202 | Patient092D | Patient131   |
| 11202 | Patient094C | Patient217A  |
| 11202 | Patient094E | Patient217D  |
| 11202 | Patient099C | Patient133   |
| 11202 | Patient099E | Patient251   |
| 11202 | Patient108F | Patient133   |
| 11202 | Patient126E | Patient258F  |
| 11202 | Patient133  | Patient196A  |
| 11202 | Patient133  | Patient201B  |
| 11202 | Patient141B | Patient210   |
| 11202 | Patient158  | Patient261B  |
| 11202 | Patient164  | Patient222B  |
| 11202 | Patient189E | Patient241   |
| 11202 | Patient189E | Patient258A1 |
| 11202 | Patient218A | Patient258F  |
| 11202 | Patient218A | Patient258G  |
| 11202 | Patient218B | Patient258A1 |
| 11202 | Patient218B | Patient258D  |



|       |             |              |
|-------|-------------|--------------|
| 11203 | Patient026D | Patient210   |
| 11203 | Patient028  | Patient092B  |
| 11203 | Patient028  | Patient192F  |
| 11203 | Patient034D | Patient210   |
| 11203 | Patient066E | Patient205   |
| 11203 | Patient094C | Patient217C  |
| 11203 | Patient094D | Patient217J  |
| 11203 | Patient099D | Patient133   |
| 11203 | Patient104B | Patient167   |
| 11203 | Patient109A | Patient133   |
| 11203 | Patient126E | Patient258A2 |
| 11203 | Patient133  | Patient265   |
| 11203 | Patient150C | Patient158   |
| 11203 | Patient164  | Patient220A  |
| 11203 | Patient164  | Patient236B  |
| 11203 | Patient189A | Patient241   |
| 11203 | Patient189A | Patient258A1 |
| 11203 | Patient189E | Patient258D  |
| 11204 | Patient026F | Patient158   |
| 11204 | Patient066A | Patient103E  |
| 11204 | Patient086C | Patient232E  |
| 11204 | Patient090  | Patient097E  |
| 11204 | Patient093A | Patient217J  |
| 11204 | Patient093D | Patient217J  |
| 11204 | Patient094C | Patient217B  |
| 11204 | Patient094C | Patient217E  |
| 11204 | Patient094C | Patient217F  |
| 11204 | Patient094C | Patient217H  |
| 11204 | Patient094C | Patient217I  |
| 11204 | Patient099E | Patient164   |
| 11204 | Patient104A | Patient167   |
| 11204 | Patient108D | Patient133   |
| 11204 | Patient126D | Patient167   |
| 11204 | Patient133  | Patient196C  |
| 11204 | Patient133  | Patient222F  |
| 11204 | Patient150C | Patient210   |
| 11204 | Patient189A | Patient258D  |
| 11204 | Patient189B | Patient241   |
| 11204 | Patient189B | Patient258A1 |
| 11204 | Patient218A | Patient258A2 |
| 11204 | Patient222B | Patient258A1 |
| 11204 | Patient236A | Patient258A1 |
| 11204 | Patient236A | Patient258D  |
| 11205 | Patient034B | Patient158   |
| 11205 | Patient090  | Patient097A  |
| 11205 | Patient090  | Patient131   |
| 11205 | Patient090  | Patient159   |
| 11205 | Patient094C | Patient217D  |
| 11205 | Patient123C | Patient158   |
| 11205 | Patient133  | Patient222D  |

|       |              |              |
|-------|--------------|--------------|
| 11205 | Patient133   | Patient222E  |
| 11205 | Patient133   | Patient247E  |
| 11205 | Patient158   | Patient230B  |
| 11205 | Patient189B  | Patient258D  |
| 11205 | Patient218B  | Patient258B  |
| 11205 | Patient218B  | Patient258G  |
| 11205 | Patient220A  | Patient251   |
| 11205 | Patient242   | Patient247A  |
| 11205 | Patient242   | Patient247B  |
| 11205 | Patient242   | Patient247C  |
| 11206 | Patient021A2 | Patient141G  |
| 11206 | Patient093E  | Patient217J  |
| 11206 | Patient094B  | Patient217J  |
| 11206 | Patient099B  | Patient258A1 |
| 11206 | Patient099B  | Patient258D  |
| 11206 | Patient126E  | Patient164   |
| 11206 | Patient133   | Patient196B  |
| 11206 | Patient150A  | Patient158   |
| 11206 | Patient150B  | Patient204   |
| 11206 | Patient158   | Patient230E  |
| 11206 | Patient167   | Patient213B  |
| 11206 | Patient189E  | Patient258B  |
| 11206 | Patient189E  | Patient258G  |
| 11206 | Patient196D  | Patient251   |
| 11206 | Patient207   | Patient213B  |
| 11206 | Patient207   | Patient252F  |
| 11206 | Patient218B  | Patient258F  |
| 11206 | Patient222B  | Patient258B  |
| 11206 | Patient222B  | Patient258D  |
| 11206 | Patient236A  | Patient251   |
| 11207 | Patient028   | Patient195   |
| 11207 | Patient054   | Patient103D  |
| 11207 | Patient099A  | Patient258A1 |
| 11207 | Patient099A  | Patient258D  |
| 11207 | Patient099C  | Patient258A1 |
| 11207 | Patient099C  | Patient258D  |
| 11207 | Patient104A  | Patient251   |
| 11207 | Patient108A  | Patient251   |
| 11207 | Patient133   | Patient196E  |
| 11207 | Patient150A  | Patient210   |
| 11207 | Patient187   | Patient258A1 |
| 11207 | Patient187   | Patient258D  |
| 11207 | Patient189A  | Patient258B  |
| 11207 | Patient189A  | Patient258G  |
| 11207 | Patient189E  | Patient258F  |
| 11207 | Patient210   | Patient230A  |
| 11207 | Patient210   | Patient230F  |
| 11207 | Patient218A  | Patient251   |
| 11207 | Patient218B  | Patient258A2 |
| 11207 | Patient222B  | Patient251   |

|       |              |              |
|-------|--------------|--------------|
| 11207 | Patient222B  | Patient258F  |
| 11207 | Patient222B  | Patient258G  |
| 11207 | Patient236A  | Patient258B  |
| 11207 | Patient236A  | Patient258G  |
| 11208 | Patient021A1 | Patient141G  |
| 11208 | Patient026B  | Patient158   |
| 11208 | Patient026E  | Patient210   |
| 11208 | Patient031   | Patient103E  |
| 11208 | Patient079C  | Patient251   |
| 11208 | Patient090   | Patient126D  |
| 11208 | Patient094E  | Patient217J  |
| 11208 | Patient097B  | Patient251   |
| 11208 | Patient123B  | Patient158   |
| 11208 | Patient126D  | Patient251   |
| 11208 | Patient126E  | Patient251   |
| 11208 | Patient127B  | Patient133   |
| 11208 | Patient158   | Patient230F  |
| 11208 | Patient158   | Patient261D  |
| 11208 | Patient164   | Patient218A  |
| 11208 | Patient167   | Patient252D  |
| 11208 | Patient189A  | Patient258F  |
| 11208 | Patient189B  | Patient258B  |
| 11208 | Patient189E  | Patient258A2 |
| 11208 | Patient204   | Patient224A  |
| 11208 | Patient210   | Patient261B  |
| 11208 | Patient210   | Patient261C  |
| 11208 | Patient222B  | Patient258A2 |
| 11208 | Patient236A  | Patient258F  |
| 11209 | Patient021A2 | Patient258A1 |
| 11209 | Patient021A2 | Patient258D  |
| 11209 | Patient022B  | Patient158   |
| 11209 | Patient026A  | Patient158   |
| 11209 | Patient034B  | Patient210   |
| 11209 | Patient090   | Patient220A  |
| 11209 | Patient099B  | Patient258B  |
| 11209 | Patient099B  | Patient258G  |
| 11209 | Patient103A  | Patient204   |
| 11209 | Patient145A  | Patient210   |
| 11209 | Patient164   | Patient218B  |
| 11209 | Patient187   | Patient258B  |
| 11209 | Patient187   | Patient258G  |
| 11209 | Patient189A  | Patient258A2 |
| 11209 | Patient189B  | Patient258F  |
| 11209 | Patient189B  | Patient258G  |
| 11209 | Patient196A  | Patient251   |
| 11209 | Patient210   | Patient230D  |
| 11209 | Patient236A  | Patient258A2 |
| 11209 | Patient258A1 | Patient265   |
| 11209 | Patient258D  | Patient265   |
| 11210 | Patient079C  | Patient090   |

|       |              |              |
|-------|--------------|--------------|
| 11210 | Patient086C  | Patient232D  |
| 11210 | Patient090   | Patient099E  |
| 11210 | Patient092D  | Patient093B  |
| 11210 | Patient093B  | Patient242   |
| 11210 | Patient099A  | Patient258B  |
| 11210 | Patient099A  | Patient258G  |
| 11210 | Patient099B  | Patient258F  |
| 11210 | Patient099C  | Patient258B  |
| 11210 | Patient099C  | Patient258G  |
| 11210 | Patient141G  | Patient157   |
| 11210 | Patient158   | Patient183A  |
| 11210 | Patient187   | Patient258F  |
| 11210 | Patient189B  | Patient258A2 |
| 11210 | Patient222A  | Patient258D  |
| 11210 | Patient222F  | Patient258A1 |
| 11210 | Patient222F  | Patient258D  |
| 11210 | Patient251   | Patient265   |
| 11211 | Patient045A  | Patient158   |
| 11211 | Patient066E  | Patient158   |
| 11211 | Patient066F  | Patient158   |
| 11211 | Patient079A1 | Patient251   |
| 11211 | Patient079A2 | Patient251   |
| 11211 | Patient090   | Patient108B1 |
| 11211 | Patient094C  | Patient217J  |
| 11211 | Patient097A  | Patient167   |
| 11211 | Patient099A  | Patient258F  |
| 11211 | Patient099B  | Patient258A2 |
| 11211 | Patient099C  | Patient258F  |
| 11211 | Patient099D  | Patient258A1 |
| 11211 | Patient109C  | Patient251   |
| 11211 | Patient127A  | Patient133   |
| 11211 | Patient158   | Patient161B  |
| 11211 | Patient158   | Patient261C  |
| 11211 | Patient187   | Patient251   |
| 11211 | Patient187   | Patient258A2 |
| 11211 | Patient196A  | Patient258A1 |
| 11211 | Patient196A  | Patient258D  |
| 11211 | Patient196C  | Patient251   |
| 11211 | Patient196C  | Patient258D  |
| 11211 | Patient206   | Patient222C  |
| 11211 | Patient218B  | Patient251   |
| 11211 | Patient222A  | Patient258A1 |
| 11211 | Patient222E  | Patient258A1 |
| 11212 | Patient021A1 | Patient258A1 |
| 11212 | Patient021A1 | Patient258D  |
| 11212 | Patient021A2 | Patient258B  |
| 11212 | Patient021A2 | Patient258G  |
| 11212 | Patient023   | Patient086C  |
| 11212 | Patient054   | Patient103E  |
| 11212 | Patient066D  | Patient158   |

|       |              |              |
|-------|--------------|--------------|
| 11212 | Patient086B  | Patient232B  |
| 11212 | Patient090   | Patient097B  |
| 11212 | Patient090   | Patient097D  |
| 11212 | Patient090   | Patient108A  |
| 11212 | Patient090   | Patient108B2 |
| 11212 | Patient092C  | Patient108B1 |
| 11212 | Patient092C  | Patient108B2 |
| 11212 | Patient092D  | Patient093A  |
| 11212 | Patient094A  | Patient206   |
| 11212 | Patient097E  | Patient167   |
| 11212 | Patient099A  | Patient258A2 |
| 11212 | Patient099C  | Patient258A2 |
| 11212 | Patient099D  | Patient258D  |
| 11212 | Patient108G  | Patient251   |
| 11212 | Patient164   | Patient236A  |
| 11212 | Patient196B  | Patient251   |
| 11212 | Patient196C  | Patient258A1 |
| 11212 | Patient196E  | Patient251   |
| 11212 | Patient206   | Patient247D  |
| 11212 | Patient222E  | Patient258D  |
| 11212 | Patient232B  | Patient258A1 |
| 11212 | Patient258B  | Patient265   |
| 11212 | Patient258G  | Patient265   |
| 11213 | Patient021A2 | Patient258F  |
| 11213 | Patient086A  | Patient232B  |
| 11213 | Patient090   | Patient097C  |
| 11213 | Patient090   | Patient236B  |
| 11213 | Patient092D  | Patient094A  |
| 11213 | Patient109E  | Patient251   |
| 11213 | Patient133   | Patient196D  |
| 11213 | Patient133   | Patient201E  |
| 11213 | Patient164   | Patient187   |
| 11213 | Patient196B  | Patient258A1 |
| 11213 | Patient196B  | Patient258D  |
| 11213 | Patient196E  | Patient258A1 |
| 11213 | Patient196E  | Patient258D  |
| 11213 | Patient196F  | Patient251   |
| 11213 | Patient222A  | Patient258B  |
| 11213 | Patient222F  | Patient251   |
| 11213 | Patient222F  | Patient258B  |
| 11213 | Patient222F  | Patient258G  |
| 11213 | Patient232B  | Patient258D  |
| 11213 | Patient251   | Patient252A  |
| 11213 | Patient258F  | Patient265   |
| 11214 | Patient021A2 | Patient258A2 |
| 11214 | Patient045C  | Patient158   |
| 11214 | Patient079A1 | Patient090   |
| 11214 | Patient079A2 | Patient090   |
| 11214 | Patient086B  | Patient232A  |
| 11214 | Patient086B  | Patient232C  |

|       |              |              |
|-------|--------------|--------------|
| 11214 | Patient086E  | Patient232B  |
| 11214 | Patient090   | Patient218A  |
| 11214 | Patient093C  | Patient176   |
| 11214 | Patient099A  | Patient164   |
| 11214 | Patient099D  | Patient258B  |
| 11214 | Patient099D  | Patient258G  |
| 11214 | Patient108H  | Patient251   |
| 11214 | Patient123D  | Patient158   |
| 11214 | Patient133   | Patient157   |
| 11214 | Patient133   | Patient246A  |
| 11214 | Patient141G  | Patient159   |
| 11214 | Patient145A  | Patient158   |
| 11214 | Patient196A  | Patient258B  |
| 11214 | Patient196A  | Patient258G  |
| 11214 | Patient196C  | Patient258B  |
| 11214 | Patient196C  | Patient258G  |
| 11214 | Patient196F  | Patient206   |
| 11214 | Patient207   | Patient252D  |
| 11214 | Patient210   | Patient261D  |
| 11214 | Patient222A  | Patient258F  |
| 11214 | Patient222A  | Patient258G  |
| 11214 | Patient222D  | Patient258A1 |
| 11214 | Patient222D  | Patient258D  |
| 11214 | Patient222E  | Patient258B  |
| 11214 | Patient222E  | Patient258G  |
| 11214 | Patient222F  | Patient258F  |
| 11214 | Patient258A2 | Patient265   |
| 11215 | Patient021A1 | Patient258B  |
| 11215 | Patient021A1 | Patient258G  |
| 11215 | Patient045B  | Patient158   |
| 11215 | Patient086A  | Patient232A  |
| 11215 | Patient086A  | Patient232C  |
| 11215 | Patient090   | Patient126E  |
| 11215 | Patient090   | Patient222A  |
| 11215 | Patient092C  | Patient232B  |
| 11215 | Patient108B1 | Patient251   |
| 11215 | Patient133   | Patient149B  |
| 11215 | Patient133   | Patient184   |
| 11215 | Patient133   | Patient201A  |
| 11215 | Patient167   | Patient252B  |
| 11215 | Patient196A  | Patient258F  |
| 11215 | Patient201B  | Patient251   |
| 11215 | Patient222F  | Patient258A2 |
| 11215 | Patient232B  | Patient258B  |
| 11215 | Patient232B  | Patient258G  |
| 11216 | Patient021A1 | Patient258F  |
| 11216 | Patient021A2 | Patient230C  |
| 11216 | Patient086B  | Patient232E  |
| 11216 | Patient086E  | Patient232A  |
| 11216 | Patient086E  | Patient232C  |

|       |              |              |
|-------|--------------|--------------|
| 11216 | Patient090   | Patient109E  |
| 11216 | Patient090   | Patient222B  |
| 11216 | Patient099B  | Patient164   |
| 11216 | Patient099B  | Patient251   |
| 11216 | Patient099D  | Patient258A2 |
| 11216 | Patient099D  | Patient258F  |
| 11216 | Patient108B2 | Patient251   |
| 11216 | Patient127A  | Patient258A1 |
| 11216 | Patient127A  | Patient258D  |
| 11216 | Patient158   | Patient183D  |
| 11216 | Patient167   | Patient252A  |
| 11216 | Patient184   | Patient258A1 |
| 11216 | Patient189E  | Patient251   |
| 11216 | Patient196A  | Patient258A2 |
| 11216 | Patient196B  | Patient258B  |
| 11216 | Patient196B  | Patient258G  |
| 11216 | Patient196C  | Patient258F  |
| 11216 | Patient196E  | Patient258B  |
| 11216 | Patient196E  | Patient258G  |
| 11216 | Patient222A  | Patient258A2 |
| 11216 | Patient222D  | Patient258B  |
| 11216 | Patient222D  | Patient258G  |
| 11216 | Patient222E  | Patient251   |
| 11216 | Patient222E  | Patient258A2 |
| 11216 | Patient222E  | Patient258F  |
| 11216 | Patient232B  | Patient258F  |
| 11216 | Patient247E  | Patient258A1 |
| 11216 | Patient251   | Patient252B  |
| 11217 | Patient021A1 | Patient258A2 |
| 11217 | Patient045D  | Patient206   |
| 11217 | Patient066D  | Patient210   |
| 11217 | Patient066F  | Patient210   |
| 11217 | Patient086A  | Patient232E  |
| 11217 | Patient090   | Patient108G  |
| 11217 | Patient090   | Patient109C  |
| 11217 | Patient092D  | Patient093D  |
| 11217 | Patient094D  | Patient242   |
| 11217 | Patient097D  | Patient167   |
| 11217 | Patient099A  | Patient251   |
| 11217 | Patient109D  | Patient251   |
| 11217 | Patient123A  | Patient210   |
| 11217 | Patient133   | Patient263B  |
| 11217 | Patient150B  | Patient158   |
| 11217 | Patient164   | Patient265   |
| 11217 | Patient184   | Patient258D  |
| 11217 | Patient189A  | Patient251   |
| 11217 | Patient196B  | Patient258F  |
| 11217 | Patient196C  | Patient258A2 |
| 11217 | Patient196E  | Patient258F  |
| 11217 | Patient210   | Patient230B  |

|       |              |              |
|-------|--------------|--------------|
| 11217 | Patient222A  | Patient251   |
| 11217 | Patient222C  | Patient251   |
| 11217 | Patient222D  | Patient258F  |
| 11217 | Patient232B  | Patient258A2 |
| 11218 | Patient021A1 | Patient230C  |
| 11218 | Patient022B  | Patient045D  |
| 11218 | Patient054   | Patient206   |
| 11218 | Patient066E  | Patient210   |
| 11218 | Patient086E  | Patient232E  |
| 11218 | Patient092D  | Patient094B  |
| 11218 | Patient092D  | Patient094D  |
| 11218 | Patient094A  | Patient235A  |
| 11218 | Patient109A  | Patient251   |
| 11218 | Patient127B  | Patient258A1 |
| 11218 | Patient127B  | Patient258D  |
| 11218 | Patient133   | Patient232B  |
| 11218 | Patient133   | Patient246B  |
| 11218 | Patient133   | Patient246C  |
| 11218 | Patient159   | Patient167   |
| 11218 | Patient164   | Patient196C  |
| 11218 | Patient164   | Patient222A  |
| 11218 | Patient195   | Patient204   |
| 11218 | Patient196B  | Patient258A2 |
| 11218 | Patient196E  | Patient258A2 |
| 11218 | Patient201B  | Patient258A1 |
| 11218 | Patient201B  | Patient258D  |
| 11218 | Patient201E  | Patient251   |
| 11218 | Patient222D  | Patient258A2 |
| 11218 | Patient247E  | Patient258B  |
| 11218 | Patient247E  | Patient258D  |
| 11218 | Patient247E  | Patient258G  |
| 11219 | Patient079C  | Patient167   |
| 11219 | Patient086C  | Patient108B1 |
| 11219 | Patient086C  | Patient108B2 |
| 11219 | Patient090   | Patient109D  |
| 11219 | Patient090   | Patient218B  |
| 11219 | Patient097B  | Patient167   |
| 11219 | Patient099C  | Patient164   |
| 11219 | Patient099C  | Patient251   |
| 11219 | Patient127A  | Patient258B  |
| 11219 | Patient127A  | Patient258G  |
| 11219 | Patient150B  | Patient210   |
| 11219 | Patient164   | Patient196A  |
| 11219 | Patient164   | Patient196B  |
| 11219 | Patient164   | Patient222F  |
| 11219 | Patient167   | Patient220A  |
| 11219 | Patient167   | Patient222B  |
| 11219 | Patient184   | Patient258B  |
| 11219 | Patient184   | Patient258G  |
| 11219 | Patient189B  | Patient251   |



|       |              |              |
|-------|--------------|--------------|
| 11219 | Patient206   | Patient263A  |
| 11219 | Patient232A  | Patient258A1 |
| 11219 | Patient232A  | Patient258D  |
| 11219 | Patient232C  | Patient258A1 |
| 11219 | Patient232C  | Patient258D  |
| 11219 | Patient247E  | Patient258F  |
| 11220 | Patient079B  | Patient251   |
| 11220 | Patient086B  | Patient232D  |
| 11220 | Patient090   | Patient108H  |
| 11220 | Patient090   | Patient187   |
| 11220 | Patient090   | Patient236A  |
| 11220 | Patient092D  | Patient093E  |
| 11220 | Patient094E  | Patient242   |
| 11220 | Patient097C  | Patient167   |
| 11220 | Patient099D  | Patient251   |
| 11220 | Patient109B  | Patient251   |
| 11220 | Patient123C  | Patient210   |
| 11220 | Patient126C  | Patient210   |
| 11220 | Patient126E  | Patient192D  |
| 11220 | Patient127A  | Patient258F  |
| 11220 | Patient149B  | Patient258A1 |
| 11220 | Patient164   | Patient222E  |
| 11220 | Patient167   | Patient252F  |
| 11220 | Patient192A  | Patient204   |
| 11220 | Patient201B  | Patient258B  |
| 11220 | Patient201B  | Patient258G  |
| 11220 | Patient232E  | Patient258A1 |
| 11220 | Patient232E  | Patient258D  |
| 11220 | Patient247E  | Patient258A2 |
| 11221 | Patient021A2 | Patient207   |
| 11221 | Patient026D  | Patient205   |
| 11221 | Patient028   | Patient251   |
| 11221 | Patient066A  | Patient074B  |
| 11221 | Patient079B  | Patient090   |
| 11221 | Patient086A  | Patient232D  |
| 11221 | Patient090   | Patient222F  |
| 11221 | Patient093A  | Patient206   |
| 11221 | Patient093E  | Patient206   |
| 11221 | Patient094B  | Patient206   |
| 11221 | Patient108F  | Patient251   |
| 11221 | Patient126E  | Patient258E  |
| 11221 | Patient127A  | Patient258A2 |
| 11221 | Patient127B  | Patient258B  |
| 11221 | Patient127B  | Patient258G  |
| 11221 | Patient131   | Patient133   |
| 11221 | Patient133   | Patient247A  |
| 11221 | Patient149B  | Patient251   |
| 11221 | Patient149B  | Patient258D  |
| 11221 | Patient159   | Patient207   |
| 11221 | Patient164   | Patient196E  |

|       |              |              |
|-------|--------------|--------------|
| 11221 | Patient164   | Patient201B  |
| 11221 | Patient184   | Patient258A2 |
| 11221 | Patient184   | Patient258F  |
| 11221 | Patient201B  | Patient258F  |
| 11221 | Patient201E  | Patient258A1 |
| 11221 | Patient222D  | Patient251   |
| 11221 | Patient251   | Patient263A  |
| 11222 | Patient022B  | Patient028   |
| 11222 | Patient023   | Patient133   |
| 11222 | Patient066A  | Patient120B  |
| 11222 | Patient066A  | Patient120D  |
| 11222 | Patient079A1 | Patient167   |
| 11222 | Patient079A2 | Patient167   |
| 11222 | Patient081C  | Patient100A  |
| 11222 | Patient086E  | Patient232D  |
| 11222 | Patient090   | Patient099A  |
| 11222 | Patient090   | Patient099B  |
| 11222 | Patient090   | Patient109B  |
| 11222 | Patient092C  | Patient232C  |
| 11222 | Patient092C  | Patient232E  |
| 11222 | Patient092D  | Patient094E  |
| 11222 | Patient099E  | Patient167   |
| 11222 | Patient127B  | Patient258F  |
| 11222 | Patient131   | Patient141G  |
| 11222 | Patient133   | Patient232C  |
| 11222 | Patient133   | Patient232E  |
| 11222 | Patient133   | Patient247B  |
| 11222 | Patient133   | Patient247C  |
| 11222 | Patient164   | Patient247E  |
| 11222 | Patient167   | Patient218A  |
| 11222 | Patient196D  | Patient258A1 |
| 11222 | Patient196D  | Patient258D  |
| 11222 | Patient201A  | Patient251   |
| 11222 | Patient201B  | Patient258A2 |
| 11222 | Patient201E  | Patient258D  |
| 11222 | Patient232A  | Patient258B  |
| 11222 | Patient232A  | Patient258G  |
| 11222 | Patient232C  | Patient258B  |
| 11222 | Patient232C  | Patient258G  |
| 11222 | Patient251   | Patient252F  |
| 11223 | Patient021A1 | Patient207   |
| 11223 | Patient021A2 | Patient261G  |
| 11223 | Patient090   | Patient201B  |
| 11223 | Patient090   | Patient222D  |
| 11223 | Patient090   | Patient222E  |
| 11223 | Patient092C  | Patient232A  |
| 11223 | Patient092D  | Patient094C  |
| 11223 | Patient099D  | Patient164   |
| 11223 | Patient103B  | Patient204   |
| 11223 | Patient108A  | Patient167   |

|       |              |              |
|-------|--------------|--------------|
| 11223 | Patient123B  | Patient210   |
| 11223 | Patient127B  | Patient258A2 |
| 11223 | Patient133   | Patient232A  |
| 11223 | Patient158   | Patient181B  |
| 11223 | Patient158   | Patient183B  |
| 11223 | Patient158   | Patient183C  |
| 11223 | Patient173B  | Patient205   |
| 11223 | Patient176   | Patient246A  |
| 11223 | Patient189A  | Patient242   |
| 11223 | Patient207   | Patient222B  |
| 11223 | Patient232A  | Patient258F  |
| 11223 | Patient232C  | Patient258A2 |
| 11223 | Patient232C  | Patient258F  |
| 11223 | Patient232E  | Patient258B  |
| 11223 | Patient232E  | Patient258G  |
| 11223 | Patient242   | Patient247E  |
| 11223 | Patient251   | Patient263B  |
| 11224 | Patient021A2 | Patient230G  |
| 11224 | Patient023   | Patient086B  |
| 11224 | Patient066A  | Patient074D  |
| 11224 | Patient066A  | Patient120C  |
| 11224 | Patient090   | Patient109A  |
| 11224 | Patient090   | Patient265   |
| 11224 | Patient092H  | Patient204   |
| 11224 | Patient108D  | Patient251   |
| 11224 | Patient133   | Patient232D  |
| 11224 | Patient133   | Patient246D  |
| 11224 | Patient149B  | Patient258B  |
| 11224 | Patient149B  | Patient258G  |
| 11224 | Patient167   | Patient236B  |
| 11224 | Patient189E  | Patient242   |
| 11224 | Patient192C  | Patient204   |
| 11224 | Patient201E  | Patient258B  |
| 11224 | Patient201E  | Patient258G  |
| 11224 | Patient213B  | Patient241   |
| 11224 | Patient232A  | Patient258A2 |
| 11224 | Patient232E  | Patient258F  |
| 11224 | Patient258A1 | Patient263B  |
| 11224 | Patient258D  | Patient263B  |
| 11225 | Patient021A1 | Patient261G  |
| 11225 | Patient021A2 | Patient141F  |
| 11225 | Patient023   | Patient086A  |
| 11225 | Patient026C  | Patient126E  |
| 11225 | Patient066A  | Patient074A  |
| 11225 | Patient066A  | Patient074C  |
| 11225 | Patient074B  | Patient158   |
| 11225 | Patient090   | Patient108F  |
| 11225 | Patient090   | Patient196A  |
| 11225 | Patient093D  | Patient235A  |
| 11225 | Patient149B  | Patient258F  |

|       |              |              |
|-------|--------------|--------------|
| 11225 | Patient158   | Patient181A  |
| 11225 | Patient183A  | Patient205   |
| 11225 | Patient189A  | Patient207   |
| 11225 | Patient189E  | Patient207   |
| 11225 | Patient192B  | Patient204   |
| 11225 | Patient196D  | Patient258B  |
| 11225 | Patient196D  | Patient258G  |
| 11225 | Patient201A  | Patient258A1 |
| 11225 | Patient201A  | Patient258D  |
| 11225 | Patient232E  | Patient258A2 |
| 11226 | Patient021A1 | Patient230G  |
| 11226 | Patient022B  | Patient204   |
| 11226 | Patient023   | Patient086E  |
| 11226 | Patient090   | Patient108D  |
| 11226 | Patient090   | Patient127B  |
| 11226 | Patient093A  | Patient235A  |
| 11226 | Patient093D  | Patient206   |
| 11226 | Patient109C  | Patient167   |
| 11226 | Patient123A  | Patient205   |
| 11226 | Patient126A  | Patient204   |
| 11226 | Patient126C  | Patient158   |
| 11226 | Patient127A  | Patient164   |
| 11226 | Patient127B  | Patient164   |
| 11226 | Patient133   | Patient246E  |
| 11226 | Patient149B  | Patient258A2 |
| 11226 | Patient158   | Patient177   |
| 11226 | Patient164   | Patient222D  |
| 11226 | Patient164   | Patient232B  |
| 11226 | Patient167   | Patient218B  |
| 11226 | Patient189B  | Patient242   |
| 11226 | Patient196D  | Patient258F  |
| 11226 | Patient201E  | Patient258A2 |
| 11226 | Patient201E  | Patient258F  |
| 11226 | Patient207   | Patient236B  |
| 11226 | Patient232D  | Patient258A1 |
| 11227 | Patient021A1 | Patient141F  |
| 11227 | Patient026E  | Patient205   |
| 11227 | Patient038   | Patient173A  |
| 11227 | Patient079B  | Patient167   |
| 11227 | Patient090   | Patient196C  |
| 11227 | Patient092G  | Patient204   |
| 11227 | Patient093C  | Patient121A  |
| 11227 | Patient094B  | Patient235A  |
| 11227 | Patient099E  | Patient207   |
| 11227 | Patient108B1 | Patient167   |
| 11227 | Patient108B2 | Patient167   |
| 11227 | Patient126A  | Patient158   |
| 11227 | Patient157   | Patient164   |
| 11227 | Patient158   | Patient183E  |
| 11227 | Patient158   | Patient220B  |

|       |              |              |
|-------|--------------|--------------|
| 11227 | Patient158   | Patient224B  |
| 11227 | Patient196D  | Patient258A2 |
| 11227 | Patient232D  | Patient258D  |
| 11227 | Patient258B  | Patient263B  |
| 11227 | Patient258G  | Patient263B  |
| 11228 | Patient022B  | Patient054   |
| 11228 | Patient026F  | Patient210   |
| 11228 | Patient066A  | Patient074E  |
| 11228 | Patient074A  | Patient158   |
| 11228 | Patient074C  | Patient158   |
| 11228 | Patient081D  | Patient100A  |
| 11228 | Patient090   | Patient099C  |
| 11228 | Patient093C  | Patient121B  |
| 11228 | Patient094C  | Patient206   |
| 11228 | Patient103C  | Patient204   |
| 11228 | Patient108G  | Patient167   |
| 11228 | Patient123D  | Patient210   |
| 11228 | Patient126E  | Patient167   |
| 11228 | Patient127A  | Patient251   |
| 11228 | Patient149B  | Patient164   |
| 11228 | Patient164   | Patient201E  |
| 11228 | Patient189B  | Patient207   |
| 11228 | Patient192D  | Patient232B  |
| 11228 | Patient201A  | Patient258B  |
| 11228 | Patient201A  | Patient258G  |
| 11228 | Patient232D  | Patient258B  |
| 11228 | Patient232D  | Patient258G  |
| 11228 | Patient247A  | Patient258A1 |
| 11228 | Patient247A  | Patient258D  |
| 11228 | Patient258F  | Patient263B  |
| 11229 | Patient021A2 | Patient032E  |
| 11229 | Patient021A2 | Patient145B  |
| 11229 | Patient022B  | Patient222C  |
| 11229 | Patient074D  | Patient158   |
| 11229 | Patient090   | Patient099D  |
| 11229 | Patient090   | Patient127A  |
| 11229 | Patient093B  | Patient176   |
| 11229 | Patient109E  | Patient167   |
| 11229 | Patient126E  | Patient207   |
| 11229 | Patient164   | Patient184   |
| 11229 | Patient164   | Patient201A  |
| 11229 | Patient177   | Patient204   |
| 11229 | Patient184   | Patient251   |
| 11229 | Patient201A  | Patient258F  |
| 11229 | Patient232D  | Patient258F  |
| 11229 | Patient247C  | Patient258A1 |
| 11229 | Patient258A2 | Patient263B  |
| 11230 | Patient038   | Patient220B  |
| 11230 | Patient090   | Patient196B  |
| 11230 | Patient090   | Patient196E  |

|       |              |              |
|-------|--------------|--------------|
| 11230 | Patient092C  | Patient232D  |
| 11230 | Patient093E  | Patient235A  |
| 11230 | Patient108H  | Patient167   |
| 11230 | Patient109D  | Patient167   |
| 11230 | Patient126D  | Patient207   |
| 11230 | Patient176   | Patient247A  |
| 11230 | Patient176   | Patient247C  |
| 11230 | Patient176   | Patient247E  |
| 11230 | Patient201A  | Patient258A2 |
| 11230 | Patient232B  | Patient251   |
| 11230 | Patient232D  | Patient258A2 |
| 11230 | Patient241   | Patient252D  |
| 11230 | Patient247B  | Patient258A1 |
| 11230 | Patient247B  | Patient258D  |
| 11230 | Patient247C  | Patient258D  |
| 11231 | Patient021A1 | Patient032E  |
| 11231 | Patient021A1 | Patient145B  |
| 11231 | Patient021A2 | Patient251   |
| 11231 | Patient045A  | Patient210   |
| 11231 | Patient086B  | Patient108B1 |
| 11231 | Patient086B  | Patient108B2 |
| 11231 | Patient094C  | Patient235A  |
| 11231 | Patient099A  | Patient167   |
| 11231 | Patient099B  | Patient167   |
| 11231 | Patient123C  | Patient205   |
| 11231 | Patient127B  | Patient251   |
| 11231 | Patient157   | Patient207   |
| 11231 | Patient157   | Patient230C  |
| 11231 | Patient164   | Patient232C  |
| 11231 | Patient164   | Patient263B  |
| 11231 | Patient167   | Patient187   |
| 11231 | Patient183A  | Patient210   |
| 11231 | Patient247A  | Patient258B  |
| 11231 | Patient247A  | Patient258G  |
| 11232 | Patient021A2 | Patient167   |
| 11232 | Patient086A  | Patient108B1 |
| 11232 | Patient086A  | Patient108B2 |
| 11232 | Patient090   | Patient157   |
| 11232 | Patient093C  | Patient235A  |
| 11232 | Patient167   | Patient222A  |
| 11232 | Patient167   | Patient236A  |
| 11232 | Patient173A  | Patient205   |
| 11232 | Patient176   | Patient210   |
| 11232 | Patient176   | Patient247B  |
| 11232 | Patient247A  | Patient258F  |
| 11233 | Patient026B  | Patient210   |
| 11233 | Patient028   | Patient126A  |
| 11233 | Patient028   | Patient224A  |
| 11233 | Patient028   | Patient224B  |
| 11233 | Patient045A  | Patient205   |

|       |              |              |
|-------|--------------|--------------|
| 11233 | Patient086E  | Patient108B1 |
| 11233 | Patient086E  | Patient108B2 |
| 11233 | Patient109B  | Patient167   |
| 11233 | Patient123B  | Patient205   |
| 11233 | Patient164   | Patient232A  |
| 11233 | Patient164   | Patient232E  |
| 11233 | Patient187   | Patient207   |
| 11233 | Patient192E  | Patient204   |
| 11233 | Patient247A  | Patient258A2 |
| 11233 | Patient247B  | Patient258B  |
| 11233 | Patient247B  | Patient258G  |
| 11233 | Patient247C  | Patient258B  |
| 11233 | Patient247C  | Patient258G  |
| 11234 | Patient021A1 | Patient167   |
| 11234 | Patient021A2 | Patient032C  |
| 11234 | Patient022B  | Patient196F  |
| 11234 | Patient026A  | Patient210   |
| 11234 | Patient026F  | Patient205   |
| 11234 | Patient074E  | Patient158   |
| 11234 | Patient090   | Patient184   |
| 11234 | Patient090   | Patient201E  |
| 11234 | Patient092D  | Patient126D  |
| 11234 | Patient141G  | Patient247D  |
| 11234 | Patient164   | Patient196D  |
| 11234 | Patient167   | Patient196A  |
| 11234 | Patient181B  | Patient205   |
| 11234 | Patient183D  | Patient205   |
| 11234 | Patient204   | Patient235F  |
| 11234 | Patient247B  | Patient258F  |
| 11234 | Patient247C  | Patient258F  |
| 11235 | Patient021A1 | Patient032C  |
| 11235 | Patient054   | Patient195   |
| 11235 | Patient099B  | Patient207   |
| 11235 | Patient109A  | Patient167   |
| 11235 | Patient120A  | Patient205   |
| 11235 | Patient126E  | Patient241   |
| 11235 | Patient157   | Patient261G  |
| 11235 | Patient167   | Patient265   |
| 11235 | Patient192D  | Patient232C  |
| 11235 | Patient207   | Patient222F  |
| 11235 | Patient232B  | Patient258E  |
| 11235 | Patient247B  | Patient258A2 |
| 11235 | Patient247C  | Patient258A2 |
| 11236 | Patient021A1 | Patient251   |
| 11236 | Patient045B  | Patient210   |
| 11236 | Patient045C  | Patient210   |
| 11236 | Patient090   | Patient196D  |
| 11236 | Patient090   | Patient201A  |
| 11236 | Patient092E  | Patient204   |
| 11236 | Patient093C  | Patient173B  |

|       |             |              |
|-------|-------------|--------------|
| 11236 | Patient094D | Patient176   |
| 11236 | Patient099A | Patient207   |
| 11236 | Patient108F | Patient167   |
| 11236 | Patient141F | Patient157   |
| 11236 | Patient150C | Patient205   |
| 11236 | Patient157  | Patient230G  |
| 11236 | Patient164  | Patient232D  |
| 11236 | Patient204  | Patient235E  |
| 11236 | Patient207  | Patient218B  |
| 11236 | Patient207  | Patient220A  |
| 11236 | Patient207  | Patient236A  |
| 11236 | Patient236B | Patient241   |
| 11237 | Patient038  | Patient195   |
| 11237 | Patient045B | Patient205   |
| 11237 | Patient090  | Patient149B  |
| 11237 | Patient090  | Patient232B  |
| 11237 | Patient090  | Patient247E  |
| 11237 | Patient090  | Patient263B  |
| 11237 | Patient099C | Patient167   |
| 11237 | Patient100A | Patient164   |
| 11237 | Patient108D | Patient167   |
| 11237 | Patient150A | Patient205   |
| 11237 | Patient167  | Patient196C  |
| 11237 | Patient167  | Patient201B  |
| 11237 | Patient167  | Patient222F  |
| 11237 | Patient176  | Patient189B  |
| 11237 | Patient181A | Patient205   |
| 11237 | Patient183D | Patient210   |
| 11237 | Patient192D | Patient232A  |
| 11237 | Patient192D | Patient232E  |
| 11237 | Patient207  | Patient222E  |
| 11237 | Patient246A | Patient258A1 |
| 11237 | Patient246A | Patient258D  |
| 11237 | Patient246C | Patient258A1 |
| 11237 | Patient246C | Patient258D  |
| 11238 | Patient023  | Patient090   |
| 11238 | Patient026C | Patient232B  |
| 11238 | Patient081C | Patient157   |
| 11238 | Patient092G | Patient093C  |
| 11238 | Patient099C | Patient207   |
| 11238 | Patient099D | Patient167   |
| 11238 | Patient126D | Patient176   |
| 11238 | Patient126E | Patient217A  |
| 11238 | Patient127B | Patient167   |
| 11238 | Patient176  | Patient189A  |
| 11238 | Patient205  | Patient224B  |
| 11238 | Patient207  | Patient218A  |
| 11238 | Patient207  | Patient222D  |
| 11238 | Patient207  | Patient265   |
| 11238 | Patient232A | Patient251   |



|       |              |              |
|-------|--------------|--------------|
| 11238 | Patient232C  | Patient251   |
| 11239 | Patient023   | Patient092D  |
| 11239 | Patient026A  | Patient205   |
| 11239 | Patient045C  | Patient205   |
| 11239 | Patient092A  | Patient204   |
| 11239 | Patient094E  | Patient176   |
| 11239 | Patient099E  | Patient241   |
| 11239 | Patient104B  | Patient241   |
| 11239 | Patient123D  | Patient205   |
| 11239 | Patient159   | Patient230C  |
| 11239 | Patient159   | Patient261G  |
| 11239 | Patient164   | Patient247A  |
| 11239 | Patient164   | Patient247B  |
| 11239 | Patient164   | Patient247C  |
| 11239 | Patient167   | Patient196B  |
| 11239 | Patient167   | Patient196E  |
| 11239 | Patient167   | Patient222D  |
| 11239 | Patient167   | Patient222E  |
| 11239 | Patient207   | Patient222A  |
| 11239 | Patient232E  | Patient251   |
| 11240 | Patient021A2 | Patient053A1 |
| 11240 | Patient022B  | Patient263A  |
| 11240 | Patient126C  | Patient205   |
| 11240 | Patient126E  | Patient217C  |
| 11240 | Patient127A  | Patient167   |
| 11240 | Patient131   | Patient230C  |
| 11240 | Patient141F  | Patient159   |
| 11240 | Patient141G  | Patient189A  |
| 11240 | Patient167   | Patient247E  |
| 11240 | Patient176   | Patient189E  |
| 11240 | Patient246A  | Patient258B  |
| 11240 | Patient246A  | Patient258G  |
| 11240 | Patient246C  | Patient258B  |
| 11240 | Patient246C  | Patient258G  |
| 11241 | Patient021A2 | Patient261E  |
| 11241 | Patient028   | Patient173A  |
| 11241 | Patient038   | Patient120D  |
| 11241 | Patient093B  | Patient121A  |
| 11241 | Patient103A  | Patient158   |
| 11241 | Patient126E  | Patient217B  |
| 11241 | Patient126E  | Patient217E  |
| 11241 | Patient126E  | Patient217F  |
| 11241 | Patient126E  | Patient217H  |
| 11241 | Patient126E  | Patient217I  |
| 11241 | Patient141G  | Patient189E  |
| 11241 | Patient145B  | Patient157   |
| 11241 | Patient159   | Patient230G  |
| 11241 | Patient183C  | Patient205   |
| 11241 | Patient246A  | Patient258F  |
| 11241 | Patient246C  | Patient258F  |

|       |              |              |
|-------|--------------|--------------|
| 11242 | Patient021A1 | Patient053A1 |
| 11242 | Patient026B  | Patient205   |
| 11242 | Patient028   | Patient181A  |
| 11242 | Patient090   | Patient232C  |
| 11242 | Patient090   | Patient232E  |
| 11242 | Patient093B  | Patient121B  |
| 11242 | Patient099D  | Patient207   |
| 11242 | Patient104A  | Patient241   |
| 11242 | Patient126E  | Patient217D  |
| 11242 | Patient196A  | Patient207   |
| 11242 | Patient196C  | Patient207   |
| 11242 | Patient220A  | Patient241   |
| 11242 | Patient232A  | Patient258E  |
| 11242 | Patient232C  | Patient258E  |
| 11242 | Patient246A  | Patient258A2 |
| 11242 | Patient246B  | Patient258A1 |
| 11242 | Patient246B  | Patient258D  |
| 11242 | Patient246C  | Patient258A2 |
| 11243 | Patient021A1 | Patient261E  |
| 11243 | Patient028   | Patient103B  |
| 11243 | Patient028   | Patient103C  |
| 11243 | Patient028   | Patient181B  |
| 11243 | Patient038   | Patient206   |
| 11243 | Patient090   | Patient232A  |
| 11243 | Patient093C  | Patient141G  |
| 11243 | Patient108A  | Patient207   |
| 11243 | Patient141G  | Patient189B  |
| 11243 | Patient158   | Patient192A  |
| 11243 | Patient183B  | Patient205   |
| 11243 | Patient183C  | Patient210   |
| 11243 | Patient196B  | Patient207   |
| 11243 | Patient196E  | Patient207   |
| 11243 | Patient201B  | Patient207   |
| 11243 | Patient232E  | Patient258E  |
| 11244 | Patient032E  | Patient157   |
| 11244 | Patient081D  | Patient157   |
| 11244 | Patient090   | Patient232D  |
| 11244 | Patient092B  | Patient204   |
| 11244 | Patient094A  | Patient121A  |
| 11244 | Patient109C  | Patient207   |
| 11244 | Patient127A  | Patient207   |
| 11244 | Patient158   | Patient192B  |
| 11244 | Patient158   | Patient192C  |
| 11244 | Patient158   | Patient224A  |
| 11244 | Patient159   | Patient241   |
| 11244 | Patient167   | Patient232B  |
| 11244 | Patient192D  | Patient232D  |
| 11244 | Patient204   | Patient213A  |
| 11244 | Patient232D  | Patient251   |
| 11245 | Patient026C  | Patient232A  |

|       |              |              |
|-------|--------------|--------------|
| 11245 | Patient026C  | Patient232C  |
| 11245 | Patient045D  | Patient177   |
| 11245 | Patient053C  | Patient093C  |
| 11245 | Patient079C  | Patient207   |
| 11245 | Patient090   | Patient246A  |
| 11245 | Patient090   | Patient246C  |
| 11245 | Patient094A  | Patient121B  |
| 11245 | Patient127B  | Patient207   |
| 11245 | Patient157   | Patient167   |
| 11245 | Patient157   | Patient176   |
| 11245 | Patient158   | Patient213A  |
| 11245 | Patient167   | Patient196D  |
| 11245 | Patient183E  | Patient205   |
| 11245 | Patient201E  | Patient207   |
| 11245 | Patient222B  | Patient241   |
| 11245 | Patient236A  | Patient241   |
| 11245 | Patient246B  | Patient258B  |
| 11245 | Patient246B  | Patient258G  |
| 11246 | Patient022B  | Patient210   |
| 11246 | Patient026C  | Patient232E  |
| 11246 | Patient032C  | Patient157   |
| 11246 | Patient053A2 | Patient093C  |
| 11246 | Patient053B  | Patient093C  |
| 11246 | Patient079A1 | Patient207   |
| 11246 | Patient081C  | Patient159   |
| 11246 | Patient093B  | Patient235A  |
| 11246 | Patient097E  | Patient176   |
| 11246 | Patient108B1 | Patient207   |
| 11246 | Patient108B2 | Patient207   |
| 11246 | Patient108G  | Patient207   |
| 11246 | Patient149B  | Patient167   |
| 11246 | Patient167   | Patient184   |
| 11246 | Patient183B  | Patient210   |
| 11246 | Patient192F  | Patient204   |
| 11246 | Patient246B  | Patient258F  |
| 11247 | Patient032E  | Patient159   |
| 11247 | Patient079A2 | Patient207   |
| 11247 | Patient097A  | Patient176   |
| 11247 | Patient097E  | Patient207   |
| 11247 | Patient131   | Patient261G  |
| 11247 | Patient207   | Patient247E  |
| 11247 | Patient218A  | Patient241   |
| 11247 | Patient246B  | Patient258A2 |
| 11247 | Patient246C  | Patient251   |
| 11248 | Patient028   | Patient103A  |
| 11248 | Patient053A1 | Patient157   |
| 11248 | Patient094D  | Patient121A  |
| 11248 | Patient108H  | Patient207   |
| 11248 | Patient109E  | Patient207   |
| 11248 | Patient131   | Patient230G  |

|       |              |              |
|-------|--------------|--------------|
| 11248 | Patient150B  | Patient205   |
| 11248 | Patient167   | Patient201E  |
| 11248 | Patient167   | Patient246A  |
| 11248 | Patient183E  | Patient210   |
| 11248 | Patient201A  | Patient207   |
| 11248 | Patient232D  | Patient258E  |
| 11248 | Patient246D  | Patient258A1 |
| 11248 | Patient246D  | Patient258D  |
| 11248 | Patient246E  | Patient258A1 |
| 11248 | Patient246E  | Patient258D  |
| 11249 | Patient028   | Patient177   |
| 11249 | Patient090   | Patient246B  |
| 11249 | Patient093A  | Patient121B  |
| 11249 | Patient093C  | Patient145B  |
| 11249 | Patient094D  | Patient121B  |
| 11249 | Patient097A  | Patient207   |
| 11249 | Patient103B  | Patient158   |
| 11249 | Patient131   | Patient141F  |
| 11249 | Patient149B  | Patient207   |
| 11249 | Patient167   | Patient232E  |
| 11249 | Patient167   | Patient246C  |
| 11249 | Patient167   | Patient263B  |
| 11249 | Patient184   | Patient207   |
| 11249 | Patient196D  | Patient241   |
| 11249 | Patient207   | Patient263B  |
| 11249 | Patient213B  | Patient242   |
| 11250 | Patient021A2 | Patient183A  |
| 11250 | Patient092H  | Patient158   |
| 11250 | Patient093B  | Patient173B  |
| 11250 | Patient093D  | Patient121B  |
| 11250 | Patient099B  | Patient241   |
| 11250 | Patient109D  | Patient207   |
| 11250 | Patient126E  | Patient217J  |
| 11250 | Patient145B  | Patient159   |
| 11250 | Patient167   | Patient201A  |
| 11250 | Patient187   | Patient241   |
| 11250 | Patient196D  | Patient207   |
| 11250 | Patient207   | Patient232B  |
| 11250 | Patient207   | Patient246A  |
| 11250 | Patient217A  | Patient232B  |
| 11250 | Patient218B  | Patient241   |
| 11250 | Patient246D  | Patient258B  |
| 11250 | Patient246D  | Patient258G  |
| 11251 | Patient026C  | Patient232D  |
| 11251 | Patient032C  | Patient159   |
| 11251 | Patient081C  | Patient093C  |
| 11251 | Patient093E  | Patient121B  |
| 11251 | Patient094B  | Patient121B  |
| 11251 | Patient103C  | Patient158   |
| 11251 | Patient158   | Patient192E  |

|       |              |              |
|-------|--------------|--------------|
| 11251 | Patient158   | Patient235F  |
| 11251 | Patient167   | Patient232A  |
| 11251 | Patient167   | Patient232C  |
| 11251 | Patient167   | Patient246B  |
| 11251 | Patient176   | Patient222B  |
| 11251 | Patient246D  | Patient258F  |
| 11251 | Patient246E  | Patient258B  |
| 11251 | Patient246E  | Patient258G  |
| 11252 | Patient023   | Patient141G  |
| 11252 | Patient032B  | Patient093C  |
| 11252 | Patient032E  | Patient093C  |
| 11252 | Patient038   | Patient181B  |
| 11252 | Patient038   | Patient224A  |
| 11252 | Patient081D  | Patient159   |
| 11252 | Patient090   | Patient246D  |
| 11252 | Patient090   | Patient247A  |
| 11252 | Patient092G  | Patient093B  |
| 11252 | Patient103A  | Patient205   |
| 11252 | Patient108F  | Patient207   |
| 11252 | Patient131   | Patient167   |
| 11252 | Patient167   | Patient232D  |
| 11252 | Patient192A  | Patient210   |
| 11252 | Patient217C  | Patient232B  |
| 11252 | Patient222A  | Patient241   |
| 11252 | Patient242   | Patient252D  |
| 11252 | Patient246D  | Patient258A2 |
| 11252 | Patient246E  | Patient258F  |
| 11253 | Patient021A1 | Patient183A  |
| 11253 | Patient021A2 | Patient261C  |
| 11253 | Patient023   | Patient167   |
| 11253 | Patient090   | Patient247B  |
| 11253 | Patient090   | Patient247C  |
| 11253 | Patient094A  | Patient173B  |
| 11253 | Patient094E  | Patient121A  |
| 11253 | Patient099A  | Patient241   |
| 11253 | Patient109B  | Patient207   |
| 11253 | Patient205   | Patient224A  |
| 11253 | Patient207   | Patient246C  |
| 11253 | Patient217B  | Patient232B  |
| 11253 | Patient217E  | Patient232B  |
| 11253 | Patient217F  | Patient232B  |
| 11253 | Patient217H  | Patient232B  |
| 11253 | Patient217I  | Patient232B  |
| 11253 | Patient246B  | Patient251   |
| 11253 | Patient246E  | Patient258A2 |
| 11254 | Patient026D  | Patient157   |
| 11254 | Patient028   | Patient213A  |
| 11254 | Patient053A1 | Patient159   |
| 11254 | Patient081E  | Patient093C  |
| 11254 | Patient092G  | Patient094A  |

|       |              |             |
|-------|--------------|-------------|
| 11254 | Patient092G  | Patient158  |
| 11254 | Patient094D  | Patient235A |
| 11254 | Patient094E  | Patient121B |
| 11254 | Patient100A  | Patient241  |
| 11254 | Patient109A  | Patient207  |
| 11254 | Patient131   | Patient145B |
| 11254 | Patient192B  | Patient210  |
| 11254 | Patient192C  | Patient210  |
| 11254 | Patient196A  | Patient241  |
| 11254 | Patient201B  | Patient241  |
| 11254 | Patient217D  | Patient232B |
| 11255 | Patient021A1 | Patient261C |
| 11255 | Patient032E  | Patient131  |
| 11255 | Patient038   | Patient181A |
| 11255 | Patient038   | Patient224B |
| 11255 | Patient079B  | Patient207  |
| 11255 | Patient097C  | Patient176  |
| 11255 | Patient158   | Patient235E |
| 11255 | Patient196C  | Patient241  |
| 11255 | Patient207   | Patient232A |
| 11255 | Patient207   | Patient232C |
| 11255 | Patient207   | Patient246B |
| 11256 | Patient022B  | Patient100A |
| 11256 | Patient032C  | Patient093C |
| 11256 | Patient081D  | Patient093C |
| 11256 | Patient094C  | Patient121B |
| 11256 | Patient094E  | Patient235A |
| 11256 | Patient099C  | Patient241  |
| 11256 | Patient126D  | Patient141G |
| 11256 | Patient126E  | Patient242  |
| 11256 | Patient157   | Patient261E |
| 11256 | Patient167   | Patient247A |
| 11256 | Patient167   | Patient247B |
| 11256 | Patient167   | Patient247C |
| 11256 | Patient222F  | Patient241  |
| 11257 | Patient090   | Patient246E |
| 11257 | Patient093B  | Patient141G |
| 11257 | Patient094D  | Patient173B |
| 11257 | Patient097D  | Patient207  |
| 11257 | Patient108D  | Patient207  |
| 11257 | Patient127B  | Patient241  |
| 11257 | Patient167   | Patient246D |
| 11257 | Patient176   | Patient213B |
| 11257 | Patient204   | Patient235C |
| 11257 | Patient207   | Patient232E |
| 11257 | Patient222E  | Patient241  |
| 11257 | Patient236B  | Patient242  |
| 11257 | Patient246D  | Patient251  |
| 11258 | Patient021A2 | Patient183D |
| 11258 | Patient081F  | Patient093C |

|       |              |             |
|-------|--------------|-------------|
| 11258 | Patient092D  | Patient126E |
| 11258 | Patient092G  | Patient093A |
| 11258 | Patient097B  | Patient207  |
| 11258 | Patient097C  | Patient207  |
| 11258 | Patient176   | Patient236B |
| 11258 | Patient195   | Patient205  |
| 11258 | Patient196B  | Patient241  |
| 11258 | Patient217A  | Patient232A |
| 11258 | Patient217A  | Patient232C |
| 11258 | Patient230C  | Patient247D |
| 11258 | Patient241   | Patient265  |
| 11258 | Patient246E  | Patient251  |
| 11259 | Patient026D  | Patient159  |
| 11259 | Patient026E  | Patient157  |
| 11259 | Patient032C  | Patient131  |
| 11259 | Patient038   | Patient120B |
| 11259 | Patient081B  | Patient093C |
| 11259 | Patient099D  | Patient241  |
| 11259 | Patient127A  | Patient241  |
| 11259 | Patient141F  | Patient247D |
| 11259 | Patient167   | Patient246E |
| 11259 | Patient189E  | Patient230C |
| 11259 | Patient195   | Patient210  |
| 11259 | Patient196E  | Patient241  |
| 11259 | Patient207   | Patient247A |
| 11259 | Patient217A  | Patient232E |
| 11260 | Patient021A1 | Patient183D |
| 11260 | Patient053C  | Patient093B |
| 11260 | Patient092E  | Patient158  |
| 11260 | Patient092G  | Patient093D |
| 11260 | Patient092G  | Patient094D |
| 11260 | Patient094A  | Patient141G |
| 11260 | Patient104B  | Patient242  |
| 11260 | Patient126E  | Patient176  |
| 11260 | Patient157   | Patient206  |
| 11260 | Patient189A  | Patient230C |
| 11260 | Patient192E  | Patient210  |
| 11260 | Patient217C  | Patient232A |
| 11260 | Patient217C  | Patient232C |
| 11261 | Patient038   | Patient103B |
| 11261 | Patient053A2 | Patient093B |
| 11261 | Patient053B  | Patient093B |
| 11261 | Patient081A2 | Patient093C |
| 11261 | Patient159   | Patient261E |
| 11261 | Patient176   | Patient252D |
| 11261 | Patient177   | Patient196F |
| 11261 | Patient192A  | Patient205  |
| 11261 | Patient204   | Patient235B |
| 11261 | Patient206   | Patient246A |
| 11261 | Patient207   | Patient247B |

|       |              |             |
|-------|--------------|-------------|
| 11261 | Patient217B  | Patient232A |
| 11261 | Patient217B  | Patient232C |
| 11261 | Patient217C  | Patient232E |
| 11261 | Patient217E  | Patient232C |
| 11261 | Patient217F  | Patient232A |
| 11261 | Patient217F  | Patient232C |
| 11261 | Patient217H  | Patient232A |
| 11261 | Patient217H  | Patient232C |
| 11261 | Patient217I  | Patient232A |
| 11261 | Patient217I  | Patient232C |
| 11261 | Patient230G  | Patient247D |
| 11261 | Patient247D  | Patient261G |
| 11262 | Patient026D  | Patient093C |
| 11262 | Patient032A  | Patient093C |
| 11262 | Patient053C  | Patient131  |
| 11262 | Patient054   | Patient074B |
| 11262 | Patient081C  | Patient247D |
| 11262 | Patient092G  | Patient093E |
| 11262 | Patient092G  | Patient094B |
| 11262 | Patient092H  | Patient210  |
| 11262 | Patient093C  | Patient145C |
| 11262 | Patient093C  | Patient230C |
| 11262 | Patient093C  | Patient261A |
| 11262 | Patient094E  | Patient173B |
| 11262 | Patient103D  | Patient204  |
| 11262 | Patient176   | Patient222A |
| 11262 | Patient177   | Patient222C |
| 11262 | Patient189B  | Patient230C |
| 11262 | Patient201E  | Patient241  |
| 11262 | Patient207   | Patient232D |
| 11262 | Patient207   | Patient246E |
| 11262 | Patient217B  | Patient232E |
| 11262 | Patient217D  | Patient232A |
| 11262 | Patient217D  | Patient232C |
| 11262 | Patient217E  | Patient232A |
| 11262 | Patient217E  | Patient232E |
| 11262 | Patient217F  | Patient232E |
| 11262 | Patient217H  | Patient232E |
| 11262 | Patient217I  | Patient232E |
| 11262 | Patient217J  | Patient232B |
| 11263 | Patient021A2 | Patient183C |
| 11263 | Patient038   | Patient120C |
| 11263 | Patient053A2 | Patient131  |
| 11263 | Patient053B  | Patient131  |
| 11263 | Patient053C  | Patient094A |
| 11263 | Patient092A  | Patient158  |
| 11263 | Patient093B  | Patient145B |
| 11263 | Patient093C  | Patient261E |
| 11263 | Patient104A  | Patient242  |
| 11263 | Patient158   | Patient192F |



|       |              |             |
|-------|--------------|-------------|
| 11263 | Patient207   | Patient247C |
| 11263 | Patient217D  | Patient232E |
| 11263 | Patient232B  | Patient241  |
| 11263 | Patient241   | Patient263B |
| 11264 | Patient026E  | Patient159  |
| 11264 | Patient053A2 | Patient094A |
| 11264 | Patient053B  | Patient094A |
| 11264 | Patient093A  | Patient141G |
| 11264 | Patient093D  | Patient141G |
| 11264 | Patient094D  | Patient141G |
| 11264 | Patient100A  | Patient177  |
| 11264 | Patient104B  | Patient176  |
| 11264 | Patient157   | Patient183A |
| 11264 | Patient192C  | Patient205  |
| 11264 | Patient207   | Patient246D |
| 11264 | Patient220A  | Patient242  |
| 11265 | Patient021A2 | Patient183E |
| 11265 | Patient032B  | Patient131  |
| 11265 | Patient034A  | Patient093C |
| 11265 | Patient053C  | Patient093A |
| 11265 | Patient054   | Patient074D |
| 11265 | Patient092G  | Patient094C |
| 11265 | Patient092G  | Patient094E |
| 11265 | Patient092G  | Patient210  |
| 11265 | Patient097D  | Patient176  |
| 11265 | Patient099E  | Patient242  |
| 11265 | Patient104A  | Patient176  |
| 11265 | Patient149B  | Patient241  |
| 11265 | Patient159   | Patient242  |
| 11265 | Patient201A  | Patient241  |
| 11265 | Patient222B  | Patient242  |
| 11266 | Patient021A1 | Patient183C |
| 11266 | Patient021A2 | Patient183B |
| 11266 | Patient032E  | Patient093B |
| 11266 | Patient034C  | Patient093C |
| 11266 | Patient038   | Patient103C |
| 11266 | Patient053A2 | Patient093A |
| 11266 | Patient053B  | Patient093A |
| 11266 | Patient053C  | Patient093D |
| 11266 | Patient054   | Patient074A |
| 11266 | Patient054   | Patient074C |
| 11266 | Patient081A1 | Patient093C |
| 11266 | Patient081C  | Patient093B |
| 11266 | Patient081C  | Patient189E |
| 11266 | Patient092H  | Patient205  |
| 11266 | Patient093E  | Patient141G |
| 11266 | Patient094A  | Patient145B |
| 11266 | Patient100A  | Patient150C |
| 11266 | Patient103B  | Patient205  |
| 11266 | Patient141F  | Patient189A |

|       |              |             |
|-------|--------------|-------------|
| 11266 | Patient141G  | Patient252D |
| 11266 | Patient176   | Patient236A |
| 11266 | Patient184   | Patient241  |
| 11266 | Patient192B  | Patient205  |
| 11266 | Patient217A  | Patient232D |
| 11266 | Patient217C  | Patient232D |
| 11266 | Patient236A  | Patient242  |
| 11266 | Patient241   | Patient246C |
| 11267 | Patient026E  | Patient093C |
| 11267 | Patient032B  | Patient093B |
| 11267 | Patient034E  | Patient093C |
| 11267 | Patient053A2 | Patient093D |
| 11267 | Patient053B  | Patient093D |
| 11267 | Patient053C  | Patient093E |
| 11267 | Patient053C  | Patient094B |
| 11267 | Patient053C  | Patient094D |
| 11267 | Patient081C  | Patient189A |
| 11267 | Patient092B  | Patient158  |
| 11267 | Patient094B  | Patient141G |
| 11267 | Patient103E  | Patient204  |
| 11267 | Patient131   | Patient141D |
| 11267 | Patient131   | Patient261E |
| 11267 | Patient141F  | Patient189E |
| 11267 | Patient141G  | Patient213B |
| 11267 | Patient145B  | Patient247D |
| 11267 | Patient157   | Patient261C |
| 11267 | Patient176   | Patient196A |
| 11267 | Patient189E  | Patient230G |
| 11267 | Patient189E  | Patient261G |
| 11267 | Patient204   | Patient220B |
| 11267 | Patient217B  | Patient232D |
| 11267 | Patient217E  | Patient232D |
| 11267 | Patient217F  | Patient232D |
| 11267 | Patient217H  | Patient232D |
| 11267 | Patient217I  | Patient232D |
| 11267 | Patient218A  | Patient242  |
| 11267 | Patient222D  | Patient241  |
| 11268 | Patient021A1 | Patient183E |
| 11268 | Patient032E  | Patient247D |
| 11268 | Patient053A2 | Patient094B |
| 11268 | Patient053A2 | Patient094D |
| 11268 | Patient053B  | Patient093E |
| 11268 | Patient053B  | Patient094B |
| 11268 | Patient053B  | Patient094D |
| 11268 | Patient081C  | Patient094A |
| 11268 | Patient081C  | Patient189B |
| 11268 | Patient081D  | Patient247D |
| 11268 | Patient093C  | Patient261G |
| 11268 | Patient100A  | Patient161B |
| 11268 | Patient126A  | Patient205  |

|       |              |              |
|-------|--------------|--------------|
| 11268 | Patient126E  | Patient235A  |
| 11268 | Patient176   | Patient196C  |
| 11268 | Patient176   | Patient201B  |
| 11268 | Patient176   | Patient252B  |
| 11268 | Patient189A  | Patient230G  |
| 11268 | Patient189A  | Patient261G  |
| 11268 | Patient217D  | Patient232D  |
| 11268 | Patient232E  | Patient241   |
| 11268 | Patient241   | Patient246B  |
| 11269 | Patient021A1 | Patient183B  |
| 11269 | Patient023   | Patient207   |
| 11269 | Patient034D  | Patient093C  |
| 11269 | Patient053A2 | Patient093E  |
| 11269 | Patient081E  | Patient093B  |
| 11269 | Patient092D  | Patient108B1 |
| 11269 | Patient092D  | Patient108B2 |
| 11269 | Patient092G  | Patient205   |
| 11269 | Patient097A  | Patient141G  |
| 11269 | Patient120D  | Patient158   |
| 11269 | Patient141F  | Patient189B  |
| 11269 | Patient189B  | Patient230G  |
| 11269 | Patient189B  | Patient261G  |
| 11269 | Patient232C  | Patient241   |
| 11270 | Patient022B  | Patient205   |
| 11270 | Patient032C  | Patient093B  |
| 11270 | Patient032E  | Patient094A  |
| 11270 | Patient054   | Patient074E  |
| 11270 | Patient079C  | Patient176   |
| 11270 | Patient081D  | Patient093B  |
| 11270 | Patient081E  | Patient094A  |
| 11270 | Patient092D  | Patient232B  |
| 11270 | Patient093A  | Patient145B  |
| 11270 | Patient093C  | Patient141F  |
| 11270 | Patient093C  | Patient230G  |
| 11270 | Patient093D  | Patient145B  |
| 11270 | Patient094D  | Patient145B  |
| 11270 | Patient094E  | Patient141G  |
| 11270 | Patient097E  | Patient141G  |
| 11270 | Patient141G  | Patient252A  |
| 11270 | Patient158   | Patient235C  |
| 11270 | Patient176   | Patient222F  |
| 11270 | Patient176   | Patient252A  |
| 11270 | Patient176   | Patient265   |
| 11270 | Patient177   | Patient263A  |
| 11270 | Patient206   | Patient247A  |
| 11270 | Patient217J  | Patient232A  |
| 11270 | Patient217J  | Patient232C  |
| 11271 | Patient023   | Patient230C  |
| 11271 | Patient032B  | Patient094A  |
| 11271 | Patient032D  | Patient247D  |

|       |              |             |
|-------|--------------|-------------|
| 11271 | Patient094C  | Patient141G |
| 11271 | Patient104B  | Patient141G |
| 11271 | Patient157   | Patient183D |
| 11271 | Patient158   | Patient195  |
| 11271 | Patient159   | Patient176  |
| 11271 | Patient159   | Patient261C |
| 11271 | Patient176   | Patient222E |
| 11271 | Patient217J  | Patient232E |
| 11271 | Patient232A  | Patient241  |
| 11271 | Patient241   | Patient246E |
| 11272 | Patient032C  | Patient247D |
| 11272 | Patient053C  | Patient094C |
| 11272 | Patient053C  | Patient094E |
| 11272 | Patient081C  | Patient093D |
| 11272 | Patient081D  | Patient094A |
| 11272 | Patient081D  | Patient189E |
| 11272 | Patient081F  | Patient093B |
| 11272 | Patient092E  | Patient210  |
| 11272 | Patient093C  | Patient261B |
| 11272 | Patient093E  | Patient145B |
| 11272 | Patient094B  | Patient145B |
| 11272 | Patient097B  | Patient176  |
| 11272 | Patient100A  | Patient150A |
| 11272 | Patient120A  | Patient210  |
| 11272 | Patient141G  | Patient222B |
| 11272 | Patient141G  | Patient252B |
| 11272 | Patient176   | Patient196B |
| 11272 | Patient176   | Patient252F |
| 11272 | Patient177   | Patient205  |
| 11272 | Patient187   | Patient242  |
| 11272 | Patient196D  | Patient242  |
| 11272 | Patient206   | Patient247B |
| 11272 | Patient206   | Patient247C |
| 11272 | Patient218B  | Patient242  |
| 11272 | Patient222A  | Patient242  |
| 11273 | Patient032A  | Patient131  |
| 11273 | Patient032D  | Patient189A |
| 11273 | Patient032D  | Patient189E |
| 11273 | Patient032E  | Patient093A |
| 11273 | Patient032E  | Patient093D |
| 11273 | Patient032E  | Patient094D |
| 11273 | Patient053A2 | Patient094C |
| 11273 | Patient053A2 | Patient094E |
| 11273 | Patient053B  | Patient094C |
| 11273 | Patient053B  | Patient094E |
| 11273 | Patient074B  | Patient204  |
| 11273 | Patient079A2 | Patient176  |
| 11273 | Patient081B  | Patient093B |
| 11273 | Patient081C  | Patient093A |
| 11273 | Patient081C  | Patient094D |

|       |              |              |
|-------|--------------|--------------|
| 11273 | Patient081D  | Patient189A  |
| 11273 | Patient093C  | Patient123A  |
| 11273 | Patient103C  | Patient205   |
| 11273 | Patient104A  | Patient141G  |
| 11273 | Patient120B  | Patient158   |
| 11273 | Patient126D  | Patient230C  |
| 11273 | Patient131   | Patient183A  |
| 11273 | Patient157   | Patient230D  |
| 11273 | Patient176   | Patient196E  |
| 11273 | Patient232D  | Patient241   |
| 11274 | Patient032B  | Patient093A  |
| 11274 | Patient032B  | Patient094D  |
| 11274 | Patient032C  | Patient094A  |
| 11274 | Patient032D  | Patient189B  |
| 11274 | Patient034B  | Patient093C  |
| 11274 | Patient038   | Patient103A  |
| 11274 | Patient053A1 | Patient247D  |
| 11274 | Patient079A1 | Patient176   |
| 11274 | Patient081B  | Patient094A  |
| 11274 | Patient081C  | Patient094B  |
| 11274 | Patient081D  | Patient189B  |
| 11274 | Patient081F  | Patient094A  |
| 11274 | Patient092A  | Patient210   |
| 11274 | Patient097D  | Patient141G  |
| 11274 | Patient099B  | Patient242   |
| 11274 | Patient099E  | Patient176   |
| 11274 | Patient141G  | Patient220A  |
| 11274 | Patient145B  | Patient189E  |
| 11274 | Patient176   | Patient220A  |
| 11274 | Patient192E  | Patient205   |
| 11274 | Patient192F  | Patient210   |
| 11274 | Patient241   | Patient246D  |
| 11275 | Patient032B  | Patient093D  |
| 11275 | Patient032E  | Patient093E  |
| 11275 | Patient032E  | Patient094B  |
| 11275 | Patient032E  | Patient189E  |
| 11275 | Patient081A2 | Patient093B  |
| 11275 | Patient081C  | Patient093E  |
| 11275 | Patient081E  | Patient094D  |
| 11275 | Patient093C  | Patient150C  |
| 11275 | Patient093C  | Patient261C  |
| 11275 | Patient094E  | Patient145B  |
| 11275 | Patient099A  | Patient242   |
| 11275 | Patient108A  | Patient176   |
| 11275 | Patient120C  | Patient158   |
| 11275 | Patient126D  | Patient258A1 |
| 11275 | Patient131   | Patient261A  |
| 11275 | Patient145B  | Patient189A  |
| 11275 | Patient159   | Patient183D  |
| 11276 | Patient026D  | Patient093B  |

|       |              |             |
|-------|--------------|-------------|
| 11276 | Patient032A  | Patient093B |
| 11276 | Patient032B  | Patient093E |
| 11276 | Patient032B  | Patient094B |
| 11276 | Patient032E  | Patient189A |
| 11276 | Patient074A  | Patient204  |
| 11276 | Patient074D  | Patient204  |
| 11276 | Patient079C  | Patient141G |
| 11276 | Patient081E  | Patient093A |
| 11276 | Patient081E  | Patient093D |
| 11276 | Patient093B  | Patient145C |
| 11276 | Patient093B  | Patient230C |
| 11276 | Patient093C  | Patient123C |
| 11276 | Patient100A  | Patient242  |
| 11276 | Patient126D  | Patient258D |
| 11276 | Patient131   | Patient145C |
| 11276 | Patient145B  | Patient189B |
| 11276 | Patient146   | Patient207  |
| 11276 | Patient157   | Patient183C |
| 11276 | Patient158   | Patient235B |
| 11276 | Patient173A  | Patient210  |
| 11276 | Patient196A  | Patient242  |
| 11276 | Patient206   | Patient247E |
| 11276 | Patient217J  | Patient232D |
| 11277 | Patient021A2 | Patient090  |
| 11277 | Patient023   | Patient261G |
| 11277 | Patient026D  | Patient247D |
| 11277 | Patient032C  | Patient093A |
| 11277 | Patient032C  | Patient093D |
| 11277 | Patient032C  | Patient094D |
| 11277 | Patient032E  | Patient189B |
| 11277 | Patient034A  | Patient131  |
| 11277 | Patient074C  | Patient204  |
| 11277 | Patient081A2 | Patient094A |
| 11277 | Patient081C  | Patient094E |
| 11277 | Patient081D  | Patient093D |
| 11277 | Patient081D  | Patient094D |
| 11277 | Patient081E  | Patient094B |
| 11277 | Patient092D  | Patient232A |
| 11277 | Patient092D  | Patient232C |
| 11277 | Patient092D  | Patient232E |
| 11277 | Patient092E  | Patient205  |
| 11277 | Patient093B  | Patient261A |
| 11277 | Patient093C  | Patient261D |
| 11277 | Patient108B2 | Patient176  |
| 11277 | Patient141G  | Patient218A |
| 11277 | Patient141G  | Patient236B |
| 11277 | Patient141G  | Patient252F |
| 11277 | Patient159   | Patient230D |
| 11277 | Patient176   | Patient218A |
| 11277 | Patient201B  | Patient242  |

|       |              |             |
|-------|--------------|-------------|
| 11278 | Patient032E  | Patient094E |
| 11278 | Patient034C  | Patient131  |
| 11278 | Patient034E  | Patient131  |
| 11278 | Patient081C  | Patient094C |
| 11278 | Patient081D  | Patient093A |
| 11278 | Patient081E  | Patient093E |
| 11278 | Patient092B  | Patient210  |
| 11278 | Patient093B  | Patient261E |
| 11278 | Patient093C  | Patient123B |
| 11278 | Patient094A  | Patient173A |
| 11278 | Patient094C  | Patient145B |
| 11278 | Patient097B  | Patient141G |
| 11278 | Patient097C  | Patient141G |
| 11278 | Patient108A  | Patient141G |
| 11278 | Patient126D  | Patient258B |
| 11278 | Patient126D  | Patient258G |
| 11278 | Patient150C  | Patient157  |
| 11278 | Patient196C  | Patient242  |
| 11278 | Patient205   | Patient235F |
| 11278 | Patient213B  | Patient230C |
| 11278 | Patient222F  | Patient242  |
| 11279 | Patient023   | Patient141F |
| 11279 | Patient023   | Patient230G |
| 11279 | Patient026D  | Patient094A |
| 11279 | Patient032B  | Patient094E |
| 11279 | Patient032C  | Patient094B |
| 11279 | Patient032C  | Patient189E |
| 11279 | Patient034A  | Patient093B |
| 11279 | Patient079A1 | Patient141G |
| 11279 | Patient081D  | Patient094B |
| 11279 | Patient081F  | Patient094D |
| 11279 | Patient092A  | Patient205  |
| 11279 | Patient092G  | Patient126D |
| 11279 | Patient093C  | Patient183A |
| 11279 | Patient094A  | Patient145C |
| 11279 | Patient108B1 | Patient176  |
| 11279 | Patient131   | Patient261C |
| 11279 | Patient157   | Patient183B |
| 11279 | Patient157   | Patient183E |
| 11279 | Patient159   | Patient183A |
| 11279 | Patient159   | Patient183C |
| 11279 | Patient176   | Patient222D |
| 11279 | Patient210   | Patient235F |
| 11279 | Patient222E  | Patient242  |
| 11280 | Patient026C  | Patient100A |
| 11280 | Patient026F  | Patient093C |
| 11280 | Patient032A  | Patient094A |
| 11280 | Patient032C  | Patient093E |
| 11280 | Patient032C  | Patient189A |
| 11280 | Patient034C  | Patient093B |

|       |              |              |
|-------|--------------|--------------|
| 11280 | Patient045A  | Patient157   |
| 11280 | Patient079A2 | Patient141G  |
| 11280 | Patient079B  | Patient176   |
| 11280 | Patient081A1 | Patient093B  |
| 11280 | Patient081B  | Patient093A  |
| 11280 | Patient081B  | Patient094D  |
| 11280 | Patient081D  | Patient093E  |
| 11280 | Patient081E  | Patient094E  |
| 11280 | Patient081F  | Patient093A  |
| 11280 | Patient081F  | Patient093D  |
| 11280 | Patient093C  | Patient141D  |
| 11280 | Patient093C  | Patient150A  |
| 11280 | Patient093C  | Patient206   |
| 11280 | Patient094A  | Patient230C  |
| 11280 | Patient094A  | Patient261E  |
| 11280 | Patient099C  | Patient242   |
| 11280 | Patient100A  | Patient235A  |
| 11280 | Patient108G  | Patient176   |
| 11280 | Patient109C  | Patient176   |
| 11280 | Patient126D  | Patient258A2 |
| 11280 | Patient126D  | Patient258F  |
| 11280 | Patient127B  | Patient242   |
| 11280 | Patient176   | Patient201E  |
| 11280 | Patient196B  | Patient242   |
| 11280 | Patient205   | Patient235E  |
| 11280 | Patient242   | Patient265   |
| 11281 | Patient021A1 | Patient090   |
| 11281 | Patient026E  | Patient093B  |
| 11281 | Patient032C  | Patient189B  |
| 11281 | Patient032E  | Patient094C  |
| 11281 | Patient034D  | Patient131   |
| 11281 | Patient034E  | Patient093B  |
| 11281 | Patient074E  | Patient204   |
| 11281 | Patient081B  | Patient093D  |
| 11281 | Patient081F  | Patient094B  |
| 11281 | Patient093C  | Patient145A  |
| 11281 | Patient094A  | Patient261A  |
| 11281 | Patient099E  | Patient141G  |
| 11281 | Patient100A  | Patient150B  |
| 11281 | Patient109D  | Patient176   |
| 11281 | Patient109E  | Patient176   |
| 11281 | Patient141G  | Patient218B  |
| 11281 | Patient150A  | Patient157   |
| 11281 | Patient176   | Patient187   |
| 11281 | Patient176   | Patient196D  |
| 11281 | Patient196E  | Patient242   |
| 11281 | Patient232B  | Patient235A  |
| 11282 | Patient021A2 | Patient176   |
| 11282 | Patient026E  | Patient247D  |
| 11282 | Patient032C  | Patient094E  |



|       |              |             |
|-------|--------------|-------------|
| 11282 | Patient081A1 | Patient094A |
| 11282 | Patient081A2 | Patient094D |
| 11282 | Patient081B  | Patient094B |
| 11282 | Patient081D  | Patient094E |
| 11282 | Patient081E  | Patient094C |
| 11282 | Patient081F  | Patient093E |
| 11282 | Patient108B1 | Patient141G |
| 11282 | Patient127A  | Patient242  |
| 11282 | Patient131   | Patient183D |
| 11282 | Patient149B  | Patient176  |
| 11282 | Patient176   | Patient201A |
| 11282 | Patient176   | Patient218B |
| 11282 | Patient210   | Patient235C |
| 11282 | Patient247D  | Patient261E |
| 11283 | Patient022B  | Patient038  |
| 11283 | Patient026D  | Patient093A |
| 11283 | Patient032A  | Patient093A |
| 11283 | Patient032A  | Patient094D |
| 11283 | Patient032B  | Patient094C |
| 11283 | Patient034A  | Patient094A |
| 11283 | Patient034D  | Patient093B |
| 11283 | Patient045A  | Patient093C |
| 11283 | Patient081A2 | Patient093A |
| 11283 | Patient081A2 | Patient093D |
| 11283 | Patient081B  | Patient093E |
| 11283 | Patient081D  | Patient094C |
| 11283 | Patient093A  | Patient145C |
| 11283 | Patient093A  | Patient230C |
| 11283 | Patient093B  | Patient261G |
| 11283 | Patient093D  | Patient230C |
| 11283 | Patient094D  | Patient145C |
| 11283 | Patient094D  | Patient230C |
| 11283 | Patient099D  | Patient242  |
| 11283 | Patient100A  | Patient258E |
| 11283 | Patient108G  | Patient141G |
| 11283 | Patient108H  | Patient176  |
| 11283 | Patient109C  | Patient141G |
| 11283 | Patient126D  | Patient230G |
| 11283 | Patient159   | Patient183B |
| 11283 | Patient159   | Patient183E |
| 11283 | Patient176   | Patient246B |
| 11283 | Patient176   | Patient246C |
| 11284 | Patient026B  | Patient093C |
| 11284 | Patient026D  | Patient093D |
| 11284 | Patient026D  | Patient094D |
| 11284 | Patient026E  | Patient094A |
| 11284 | Patient032A  | Patient093D |
| 11284 | Patient032D  | Patient213B |
| 11284 | Patient034C  | Patient094A |
| 11284 | Patient066D  | Patient093C |

|       |              |             |
|-------|--------------|-------------|
| 11284 | Patient066F  | Patient093C |
| 11284 | Patient081A2 | Patient094B |
| 11284 | Patient081F  | Patient094E |
| 11284 | Patient092B  | Patient205  |
| 11284 | Patient093B  | Patient141F |
| 11284 | Patient093B  | Patient230G |
| 11284 | Patient093C  | Patient161B |
| 11284 | Patient093D  | Patient145C |
| 11284 | Patient093D  | Patient261A |
| 11284 | Patient094D  | Patient261A |
| 11284 | Patient108B2 | Patient141G |
| 11284 | Patient109B  | Patient176  |
| 11284 | Patient126D  | Patient141F |
| 11284 | Patient126E  | Patient141G |
| 11284 | Patient141G  | Patient187  |
| 11284 | Patient176   | Patient263B |
| 11284 | Patient196F  | Patient213A |
| 11284 | Patient210   | Patient235E |
| 11285 | Patient021A1 | Patient176  |
| 11285 | Patient023   | Patient032E |
| 11285 | Patient026A  | Patient093C |
| 11285 | Patient026D  | Patient093E |
| 11285 | Patient026D  | Patient094B |
| 11285 | Patient032A  | Patient093E |
| 11285 | Patient032A  | Patient094B |
| 11285 | Patient032C  | Patient094C |
| 11285 | Patient034E  | Patient094A |
| 11285 | Patient045C  | Patient157  |
| 11285 | Patient066E  | Patient093C |
| 11285 | Patient081A2 | Patient093E |
| 11285 | Patient081B  | Patient094C |
| 11285 | Patient081B  | Patient094E |
| 11285 | Patient081F  | Patient094C |
| 11285 | Patient092D  | Patient232D |
| 11285 | Patient093A  | Patient261A |
| 11285 | Patient093A  | Patient261E |
| 11285 | Patient093C  | Patient123D |
| 11285 | Patient093D  | Patient261E |
| 11285 | Patient093E  | Patient145C |
| 11285 | Patient093E  | Patient230C |
| 11285 | Patient094A  | Patient261G |
| 11285 | Patient094B  | Patient145C |
| 11285 | Patient094B  | Patient230C |
| 11285 | Patient094D  | Patient261E |
| 11285 | Patient099B  | Patient176  |
| 11285 | Patient108H  | Patient141G |
| 11285 | Patient123A  | Patient131  |
| 11285 | Patient126D  | Patient261G |
| 11285 | Patient131   | Patient261B |
| 11285 | Patient213A  | Patient222C |

|       |              |             |
|-------|--------------|-------------|
| 11285 | Patient242   | Patient263B |
| 11286 | Patient034A  | Patient094D |
| 11286 | Patient034B  | Patient131  |
| 11286 | Patient045A  | Patient159  |
| 11286 | Patient045B  | Patient157  |
| 11286 | Patient093A  | Patient173A |
| 11286 | Patient093E  | Patient261A |
| 11286 | Patient094B  | Patient261A |
| 11286 | Patient097E  | Patient230C |
| 11286 | Patient109E  | Patient141G |
| 11286 | Patient131   | Patient183C |
| 11286 | Patient157   | Patient177  |
| 11286 | Patient192F  | Patient205  |
| 11286 | Patient201E  | Patient242  |
| 11286 | Patient213B  | Patient261G |
| 11286 | Patient232B  | Patient242  |
| 11286 | Patient232E  | Patient235A |
| 11287 | Patient032D  | Patient104B |
| 11287 | Patient034C  | Patient094D |
| 11287 | Patient034D  | Patient094A |
| 11287 | Patient079B  | Patient141G |
| 11287 | Patient081A1 | Patient094D |
| 11287 | Patient081A2 | Patient094E |
| 11287 | Patient093B  | Patient123A |
| 11287 | Patient093B  | Patient261B |
| 11287 | Patient093D  | Patient173A |
| 11287 | Patient093E  | Patient261E |
| 11287 | Patient094A  | Patient141F |
| 11287 | Patient094A  | Patient230G |
| 11287 | Patient108F  | Patient176  |
| 11287 | Patient141F  | Patient213B |
| 11287 | Patient149B  | Patient242  |
| 11287 | Patient184   | Patient242  |
| 11287 | Patient189E  | Patient261E |
| 11287 | Patient205   | Patient213A |
| 11287 | Patient213B  | Patient230G |
| 11288 | Patient023   | Patient145B |
| 11288 | Patient026D  | Patient094E |
| 11288 | Patient026E  | Patient093A |
| 11288 | Patient032A  | Patient094E |
| 11288 | Patient034A  | Patient093A |
| 11288 | Patient034A  | Patient093D |
| 11288 | Patient034B  | Patient093B |
| 11288 | Patient034C  | Patient093A |
| 11288 | Patient034C  | Patient093D |
| 11288 | Patient034E  | Patient093A |
| 11288 | Patient034E  | Patient094D |
| 11288 | Patient045C  | Patient093C |
| 11288 | Patient045D  | Patient092C |
| 11288 | Patient081A1 | Patient093A |

|       |              |             |
|-------|--------------|-------------|
| 11288 | Patient081A1 | Patient093D |
| 11288 | Patient081A2 | Patient094C |
| 11288 | Patient093C  | Patient183D |
| 11288 | Patient093E  | Patient173A |
| 11288 | Patient094B  | Patient173A |
| 11288 | Patient094B  | Patient261E |
| 11288 | Patient094E  | Patient145C |
| 11288 | Patient094E  | Patient230C |
| 11288 | Patient097A  | Patient230C |
| 11288 | Patient099A  | Patient176  |
| 11288 | Patient108D  | Patient176  |
| 11288 | Patient123C  | Patient131  |
| 11288 | Patient141G  | Patient236A |
| 11288 | Patient150C  | Patient159  |
| 11288 | Patient157   | Patient235A |
| 11288 | Patient176   | Patient246D |
| 11288 | Patient189A  | Patient261E |
| 11288 | Patient201A  | Patient242  |
| 11288 | Patient230C  | Patient252A |
| 11288 | Patient230C  | Patient252D |
| 11288 | Patient232C  | Patient235A |
| 11288 | Patient242   | Patient246C |
| 11289 | Patient023   | Patient032C |
| 11289 | Patient026E  | Patient093D |
| 11289 | Patient026E  | Patient094D |
| 11289 | Patient034A  | Patient093E |
| 11289 | Patient034A  | Patient094B |
| 11289 | Patient034C  | Patient093E |
| 11289 | Patient034C  | Patient094B |
| 11289 | Patient034E  | Patient093D |
| 11289 | Patient045B  | Patient093C |
| 11289 | Patient045C  | Patient159  |
| 11289 | Patient081A1 | Patient094B |
| 11289 | Patient086C  | Patient146  |
| 11289 | Patient093B  | Patient150C |
| 11289 | Patient094E  | Patient261A |
| 11289 | Patient104B  | Patient230C |
| 11289 | Patient109A  | Patient176  |
| 11289 | Patient131   | Patient183B |
| 11289 | Patient150A  | Patient159  |
| 11289 | Patient222D  | Patient242  |
| 11289 | Patient232E  | Patient242  |
| 11289 | Patient242   | Patient246B |
| 11290 | Patient026D  | Patient094C |
| 11290 | Patient026E  | Patient093E |
| 11290 | Patient026E  | Patient094B |
| 11290 | Patient034D  | Patient093A |
| 11290 | Patient034D  | Patient094D |
| 11290 | Patient034E  | Patient093E |
| 11290 | Patient034E  | Patient094B |

|       |              |             |
|-------|--------------|-------------|
| 11290 | Patient045B  | Patient159  |
| 11290 | Patient081A1 | Patient093E |
| 11290 | Patient092C  | Patient146  |
| 11290 | Patient093A  | Patient261G |
| 11290 | Patient093B  | Patient261C |
| 11290 | Patient093C  | Patient150B |
| 11290 | Patient093D  | Patient261G |
| 11290 | Patient094A  | Patient120A |
| 11290 | Patient094A  | Patient123A |
| 11290 | Patient094A  | Patient261B |
| 11290 | Patient094D  | Patient261G |
| 11290 | Patient094E  | Patient261E |
| 11290 | Patient108F  | Patient141G |
| 11290 | Patient109D  | Patient141G |
| 11290 | Patient123B  | Patient131  |
| 11290 | Patient131   | Patient183E |
| 11290 | Patient131   | Patient261D |
| 11290 | Patient141G  | Patient196A |
| 11290 | Patient141G  | Patient196C |
| 11290 | Patient141G  | Patient222A |
| 11290 | Patient176   | Patient246E |
| 11290 | Patient183A  | Patient247D |
| 11290 | Patient189B  | Patient261E |
| 11290 | Patient210   | Patient235B |
| 11290 | Patient230C  | Patient252B |
| 11290 | Patient232A  | Patient235A |
| 11291 | Patient032D  | Patient104A |
| 11291 | Patient034A  | Patient094E |
| 11291 | Patient034D  | Patient093D |
| 11291 | Patient093A  | Patient141F |
| 11291 | Patient093A  | Patient173B |
| 11291 | Patient093A  | Patient230G |
| 11291 | Patient093B  | Patient123C |
| 11291 | Patient093D  | Patient141F |
| 11291 | Patient093D  | Patient173B |
| 11291 | Patient093D  | Patient230G |
| 11291 | Patient094A  | Patient150C |
| 11291 | Patient094C  | Patient145C |
| 11291 | Patient094D  | Patient141F |
| 11291 | Patient094D  | Patient230G |
| 11291 | Patient099C  | Patient176  |
| 11291 | Patient109A  | Patient141G |
| 11291 | Patient121A  | Patient126E |
| 11291 | Patient141G  | Patient265  |
| 11291 | Patient145B  | Patient213B |
| 11291 | Patient150B  | Patient157  |
| 11291 | Patient157   | Patient161B |
| 11291 | Patient232C  | Patient242  |
| 11291 | Patient247D  | Patient261C |
| 11292 | Patient032A  | Patient094C |

|       |              |             |
|-------|--------------|-------------|
| 11292 | Patient032E  | Patient126D |
| 11292 | Patient034B  | Patient094A |
| 11292 | Patient034C  | Patient094E |
| 11292 | Patient034D  | Patient093E |
| 11292 | Patient034D  | Patient094B |
| 11292 | Patient045D  | Patient242  |
| 11292 | Patient081A1 | Patient094E |
| 11292 | Patient093B  | Patient123B |
| 11292 | Patient093B  | Patient261D |
| 11292 | Patient093E  | Patient173B |
| 11292 | Patient093E  | Patient261G |
| 11292 | Patient094A  | Patient261C |
| 11292 | Patient094B  | Patient173B |
| 11292 | Patient094B  | Patient261G |
| 11292 | Patient094C  | Patient230C |
| 11292 | Patient094C  | Patient261E |
| 11292 | Patient099D  | Patient176  |
| 11292 | Patient103D  | Patient158  |
| 11292 | Patient104A  | Patient230C |
| 11292 | Patient109B  | Patient141G |
| 11292 | Patient121B  | Patient126E |
| 11292 | Patient126D  | Patient145B |
| 11292 | Patient126D  | Patient235A |
| 11292 | Patient127B  | Patient176  |
| 11292 | Patient141F  | Patient252D |
| 11292 | Patient141G  | Patient196B |
| 11292 | Patient141G  | Patient196E |
| 11292 | Patient220A  | Patient230C |
| 11292 | Patient232A  | Patient242  |
| 11292 | Patient232D  | Patient235A |
| 11292 | Patient252D  | Patient261G |
| 11293 | Patient026E  | Patient094E |
| 11293 | Patient032D  | Patient252D |
| 11293 | Patient032E  | Patient213B |
| 11293 | Patient034E  | Patient094E |
| 11293 | Patient053C  | Patient126D |
| 11293 | Patient081A1 | Patient094C |
| 11293 | Patient081C  | Patient213B |
| 11293 | Patient093B  | Patient183A |
| 11293 | Patient093C  | Patient183C |
| 11293 | Patient093E  | Patient141F |
| 11293 | Patient093E  | Patient230G |
| 11293 | Patient094B  | Patient230G |
| 11293 | Patient094C  | Patient173A |
| 11293 | Patient094C  | Patient261A |
| 11293 | Patient097A  | Patient230G |
| 11293 | Patient141G  | Patient222E |
| 11293 | Patient141G  | Patient222F |
| 11293 | Patient230G  | Patient252D |
| 11293 | Patient242   | Patient246E |

|       |              |             |
|-------|--------------|-------------|
| 11294 | Patient026F  | Patient093B |
| 11294 | Patient053B  | Patient126D |
| 11294 | Patient093A  | Patient261B |
| 11294 | Patient093B  | Patient141D |
| 11294 | Patient093B  | Patient150A |
| 11294 | Patient093C  | Patient230A |
| 11294 | Patient093D  | Patient261B |
| 11294 | Patient094A  | Patient123C |
| 11294 | Patient094A  | Patient183A |
| 11294 | Patient094B  | Patient141F |
| 11294 | Patient094D  | Patient123A |
| 11294 | Patient094D  | Patient261B |
| 11294 | Patient097A  | Patient261G |
| 11294 | Patient097D  | Patient230C |
| 11294 | Patient097E  | Patient230G |
| 11294 | Patient141G  | Patient201B |
| 11294 | Patient213A  | Patient263A |
| 11294 | Patient230C  | Patient252F |
| 11294 | Patient232D  | Patient242  |
| 11295 | Patient026E  | Patient094C |
| 11295 | Patient034A  | Patient094C |
| 11295 | Patient034B  | Patient093A |
| 11295 | Patient034B  | Patient093E |
| 11295 | Patient034B  | Patient094D |
| 11295 | Patient034D  | Patient094E |
| 11295 | Patient053A2 | Patient126D |
| 11295 | Patient081C  | Patient252D |
| 11295 | Patient093B  | Patient145A |
| 11295 | Patient094A  | Patient123B |
| 11295 | Patient094A  | Patient261D |
| 11295 | Patient094C  | Patient261G |
| 11295 | Patient094E  | Patient261G |
| 11295 | Patient097A  | Patient141F |
| 11295 | Patient097B  | Patient230C |
| 11295 | Patient097C  | Patient230C |
| 11295 | Patient097E  | Patient261G |
| 11295 | Patient108D  | Patient141G |
| 11295 | Patient131   | Patient145A |
| 11295 | Patient141G  | Patient222D |
| 11295 | Patient141G  | Patient247E |
| 11295 | Patient252A  | Patient261G |
| 11296 | Patient021A2 | Patient081C |
| 11296 | Patient023   | Patient053C |
| 11296 | Patient023   | Patient261E |
| 11296 | Patient026F  | Patient094A |
| 11296 | Patient032D  | Patient222B |
| 11296 | Patient034B  | Patient093D |
| 11296 | Patient034C  | Patient094C |
| 11296 | Patient034E  | Patient094C |
| 11296 | Patient045D  | Patient235F |

|       |              |              |
|-------|--------------|--------------|
| 11296 | Patient079C  | Patient230C  |
| 11296 | Patient093A  | Patient123A  |
| 11296 | Patient093A  | Patient150C  |
| 11296 | Patient093A  | Patient261C  |
| 11296 | Patient093B  | Patient206   |
| 11296 | Patient093C  | Patient141A  |
| 11296 | Patient093C  | Patient141C  |
| 11296 | Patient093D  | Patient123A  |
| 11296 | Patient093E  | Patient261B  |
| 11296 | Patient094A  | Patient150A  |
| 11296 | Patient094B  | Patient261B  |
| 11296 | Patient094E  | Patient230G  |
| 11296 | Patient097E  | Patient141F  |
| 11296 | Patient099B  | Patient141G  |
| 11296 | Patient104B  | Patient230G  |
| 11296 | Patient126D  | Patient173B  |
| 11296 | Patient141F  | Patient252A  |
| 11296 | Patient159   | Patient161B  |
| 11296 | Patient222B  | Patient230C  |
| 11296 | Patient230G  | Patient252A  |
| 11296 | Patient242   | Patient246D  |
| 11297 | Patient023   | Patient053A2 |
| 11297 | Patient023   | Patient053B  |
| 11297 | Patient028   | Patient103D  |
| 11297 | Patient032C  | Patient126D  |
| 11297 | Patient032C  | Patient213B  |
| 11297 | Patient032D  | Patient159   |
| 11297 | Patient034B  | Patient094B  |
| 11297 | Patient045A  | Patient093B  |
| 11297 | Patient079A1 | Patient230C  |
| 11297 | Patient093C  | Patient183B  |
| 11297 | Patient093C  | Patient183E  |
| 11297 | Patient093D  | Patient150C  |
| 11297 | Patient093D  | Patient261C  |
| 11297 | Patient093E  | Patient123A  |
| 11297 | Patient094C  | Patient173B  |
| 11297 | Patient094D  | Patient123C  |
| 11297 | Patient094D  | Patient261C  |
| 11297 | Patient094E  | Patient141F  |
| 11297 | Patient099A  | Patient141G  |
| 11297 | Patient099C  | Patient141G  |
| 11297 | Patient104B  | Patient141F  |
| 11297 | Patient104B  | Patient145B  |
| 11297 | Patient123D  | Patient131   |
| 11297 | Patient127A  | Patient141G  |
| 11297 | Patient127A  | Patient176   |
| 11297 | Patient127B  | Patient141G  |
| 11297 | Patient183D  | Patient247D  |
| 11297 | Patient230C  | Patient236B  |
| 11297 | Patient230D  | Patient247D  |



|       |              |              |
|-------|--------------|--------------|
| 11298 | Patient026B  | Patient093B  |
| 11298 | Patient032B  | Patient126D  |
| 11298 | Patient032E  | Patient104B  |
| 11298 | Patient034D  | Patient094C  |
| 11298 | Patient045A  | Patient094A  |
| 11298 | Patient066D  | Patient093B  |
| 11298 | Patient066F  | Patient093B  |
| 11298 | Patient079A2 | Patient230C  |
| 11298 | Patient093A  | Patient123C  |
| 11298 | Patient093B  | Patient161B  |
| 11298 | Patient093C  | Patient141B  |
| 11298 | Patient094A  | Patient141D  |
| 11298 | Patient094A  | Patient145A  |
| 11298 | Patient094B  | Patient123A  |
| 11298 | Patient094B  | Patient150C  |
| 11298 | Patient094C  | Patient141F  |
| 11298 | Patient094C  | Patient230G  |
| 11298 | Patient094D  | Patient150C  |
| 11298 | Patient097D  | Patient230G  |
| 11298 | Patient097D  | Patient261G  |
| 11298 | Patient099E  | Patient230C  |
| 11298 | Patient104B  | Patient206   |
| 11298 | Patient141F  | Patient222B  |
| 11298 | Patient141F  | Patient252B  |
| 11298 | Patient141G  | Patient232B  |
| 11298 | Patient150B  | Patient159   |
| 11298 | Patient218A  | Patient230C  |
| 11298 | Patient218B  | Patient230C  |
| 11298 | Patient220A  | Patient261G  |
| 11298 | Patient222B  | Patient230G  |
| 11298 | Patient222B  | Patient261G  |
| 11298 | Patient230G  | Patient252B  |
| 11298 | Patient252B  | Patient261G  |
| 11299 | Patient021A1 | Patient081C  |
| 11299 | Patient023   | Patient032B  |
| 11299 | Patient026A  | Patient093B  |
| 11299 | Patient032D  | Patient220A  |
| 11299 | Patient032E  | Patient252D  |
| 11299 | Patient045D  | Patient053A1 |
| 11299 | Patient066E  | Patient093B  |
| 11299 | Patient081D  | Patient213B  |
| 11299 | Patient086A  | Patient146   |
| 11299 | Patient086B  | Patient146   |
| 11299 | Patient093A  | Patient261D  |
| 11299 | Patient093B  | Patient123D  |
| 11299 | Patient093D  | Patient123C  |
| 11299 | Patient093D  | Patient261D  |
| 11299 | Patient093E  | Patient150C  |
| 11299 | Patient093E  | Patient261C  |
| 11299 | Patient094B  | Patient261C  |

|       |              |             |
|-------|--------------|-------------|
| 11299 | Patient094D  | Patient123B |
| 11299 | Patient094D  | Patient183A |
| 11299 | Patient094D  | Patient261D |
| 11299 | Patient094E  | Patient123A |
| 11299 | Patient094E  | Patient261B |
| 11299 | Patient103E  | Patient158  |
| 11299 | Patient104A  | Patient141F |
| 11299 | Patient126D  | Patient141D |
| 11299 | Patient126E  | Patient173B |
| 11299 | Patient145B  | Patient252D |
| 11299 | Patient189E  | Patient261C |
| 11300 | Patient026F  | Patient093A |
| 11300 | Patient034B  | Patient094E |
| 11300 | Patient045D  | Patient235E |
| 11300 | Patient053A1 | Patient104B |
| 11300 | Patient086E  | Patient146  |
| 11300 | Patient093A  | Patient145A |
| 11300 | Patient093A  | Patient183A |
| 11300 | Patient093E  | Patient123C |
| 11300 | Patient094B  | Patient123C |
| 11300 | Patient097D  | Patient141F |
| 11300 | Patient099E  | Patient230G |
| 11300 | Patient099E  | Patient261G |
| 11300 | Patient104A  | Patient230G |
| 11300 | Patient108A  | Patient230C |
| 11300 | Patient109C  | Patient230C |
| 11300 | Patient141F  | Patient220A |
| 11300 | Patient141G  | Patient184  |
| 11300 | Patient141G  | Patient196D |
| 11300 | Patient141G  | Patient201E |
| 11300 | Patient161B  | Patient189E |
| 11300 | Patient189A  | Patient261C |
| 11300 | Patient220A  | Patient230G |
| 11301 | Patient023   | Patient141D |
| 11301 | Patient053A1 | Patient146  |
| 11301 | Patient066D  | Patient094A |
| 11301 | Patient066F  | Patient094A |
| 11301 | Patient081C  | Patient220A |
| 11301 | Patient092C  | Patient196F |
| 11301 | Patient093A  | Patient123B |
| 11301 | Patient093A  | Patient141D |
| 11301 | Patient093A  | Patient150A |
| 11301 | Patient093C  | Patient230D |
| 11301 | Patient093C  | Patient230E |
| 11301 | Patient093D  | Patient123B |
| 11301 | Patient093D  | Patient183A |
| 11301 | Patient093E  | Patient183A |
| 11301 | Patient093E  | Patient261D |
| 11301 | Patient094B  | Patient183A |
| 11301 | Patient094B  | Patient261D |

|       |              |             |
|-------|--------------|-------------|
| 11301 | Patient094C  | Patient261B |
| 11301 | Patient094E  | Patient150C |
| 11301 | Patient097A  | Patient145B |
| 11301 | Patient097E  | Patient145B |
| 11301 | Patient099D  | Patient141G |
| 11301 | Patient099E  | Patient141F |
| 11301 | Patient104A  | Patient145B |
| 11301 | Patient104A  | Patient206  |
| 11301 | Patient108A  | Patient261G |
| 11301 | Patient126D  | Patient258E |
| 11301 | Patient126E  | Patient230C |
| 11301 | Patient161B  | Patient189A |
| 11301 | Patient176   | Patient184  |
| 11301 | Patient189B  | Patient261C |
| 11301 | Patient205   | Patient235C |
| 11301 | Patient218A  | Patient230G |
| 11301 | Patient218A  | Patient261G |
| 11302 | Patient021A2 | Patient081D |
| 11302 | Patient023   | Patient261A |
| 11302 | Patient026A  | Patient094A |
| 11302 | Patient026B  | Patient094A |
| 11302 | Patient026F  | Patient093D |
| 11302 | Patient026F  | Patient094D |
| 11302 | Patient032C  | Patient104B |
| 11302 | Patient032D  | Patient097A |
| 11302 | Patient032E  | Patient097A |
| 11302 | Patient032E  | Patient104A |
| 11302 | Patient045C  | Patient093B |
| 11302 | Patient066E  | Patient094A |
| 11302 | Patient079C  | Patient141F |
| 11302 | Patient079C  | Patient230G |
| 11302 | Patient079C  | Patient261G |
| 11302 | Patient081C  | Patient222B |
| 11302 | Patient081D  | Patient252D |
| 11302 | Patient092C  | Patient222C |
| 11302 | Patient093B  | Patient183D |
| 11302 | Patient093D  | Patient141D |
| 11302 | Patient093D  | Patient150A |
| 11302 | Patient093E  | Patient123B |
| 11302 | Patient094A  | Patient123D |
| 11302 | Patient094A  | Patient161B |
| 11302 | Patient094B  | Patient123B |
| 11302 | Patient094B  | Patient145A |
| 11302 | Patient094C  | Patient123A |
| 11302 | Patient094D  | Patient141D |
| 11302 | Patient094D  | Patient145A |
| 11302 | Patient094D  | Patient150A |
| 11302 | Patient094E  | Patient123C |
| 11302 | Patient094E  | Patient261C |
| 11302 | Patient108G  | Patient230C |

|       |              |             |
|-------|--------------|-------------|
| 11302 | Patient141G  | Patient149B |
| 11302 | Patient183C  | Patient247D |
| 11302 | Patient205   | Patient235B |
| 11303 | Patient026D  | Patient213B |
| 11303 | Patient026F  | Patient093E |
| 11303 | Patient026F  | Patient094B |
| 11303 | Patient032C  | Patient252D |
| 11303 | Patient032D  | Patient079C |
| 11303 | Patient032D  | Patient097E |
| 11303 | Patient032E  | Patient097E |
| 11303 | Patient032E  | Patient252A |
| 11303 | Patient034B  | Patient094C |
| 11303 | Patient045A  | Patient093A |
| 11303 | Patient045A  | Patient094D |
| 11303 | Patient045B  | Patient093B |
| 11303 | Patient092C  | Patient100A |
| 11303 | Patient092G  | Patient126E |
| 11303 | Patient093A  | Patient161B |
| 11303 | Patient093D  | Patient145A |
| 11303 | Patient093D  | Patient161B |
| 11303 | Patient093E  | Patient141D |
| 11303 | Patient094B  | Patient150A |
| 11303 | Patient094C  | Patient150C |
| 11303 | Patient094C  | Patient261C |
| 11303 | Patient094D  | Patient206  |
| 11303 | Patient097B  | Patient230G |
| 11303 | Patient097C  | Patient230G |
| 11303 | Patient108B1 | Patient230C |
| 11303 | Patient108B2 | Patient230C |
| 11303 | Patient108H  | Patient230C |
| 11303 | Patient121A  | Patient232B |
| 11303 | Patient141F  | Patient218A |
| 11303 | Patient141F  | Patient252F |
| 11303 | Patient141G  | Patient201A |
| 11303 | Patient141G  | Patient246A |
| 11303 | Patient145B  | Patient252A |
| 11303 | Patient161B  | Patient189B |
| 11303 | Patient187   | Patient230C |
| 11303 | Patient189E  | Patient230D |
| 11303 | Patient230G  | Patient236B |
| 11303 | Patient230G  | Patient252F |
| 11303 | Patient236B  | Patient261G |
| 11303 | Patient252F  | Patient261G |
| 11304 | Patient028   | Patient103E |
| 11304 | Patient032D  | Patient218A |
| 11304 | Patient032E  | Patient222B |
| 11304 | Patient045B  | Patient094A |
| 11304 | Patient045C  | Patient094A |
| 11304 | Patient053A1 | Patient104A |
| 11304 | Patient053A1 | Patient252D |

|       |              |             |
|-------|--------------|-------------|
| 11304 | Patient081C  | Patient104B |
| 11304 | Patient093B  | Patient150B |
| 11304 | Patient093C  | Patient126C |
| 11304 | Patient093E  | Patient145A |
| 11304 | Patient093E  | Patient150A |
| 11304 | Patient094A  | Patient183D |
| 11304 | Patient094B  | Patient141D |
| 11304 | Patient094E  | Patient123B |
| 11304 | Patient094E  | Patient183A |
| 11304 | Patient094E  | Patient261D |
| 11304 | Patient097B  | Patient141F |
| 11304 | Patient097B  | Patient261G |
| 11304 | Patient097C  | Patient141F |
| 11304 | Patient097C  | Patient261G |
| 11304 | Patient104B  | Patient261G |
| 11304 | Patient108A  | Patient141F |
| 11304 | Patient108A  | Patient230G |
| 11304 | Patient109E  | Patient230C |
| 11304 | Patient121B  | Patient232B |
| 11304 | Patient126D  | Patient261E |
| 11304 | Patient141G  | Patient246C |
| 11304 | Patient150C  | Patient247D |
| 11304 | Patient189A  | Patient230D |
| 11305 | Patient021A1 | Patient081D |
| 11305 | Patient023   | Patient183A |
| 11305 | Patient026B  | Patient093A |
| 11305 | Patient032D  | Patient099E |
| 11305 | Patient032E  | Patient220A |
| 11305 | Patient032E  | Patient252B |
| 11305 | Patient045A  | Patient093D |
| 11305 | Patient066D  | Patient093A |
| 11305 | Patient066D  | Patient094D |
| 11305 | Patient066F  | Patient093A |
| 11305 | Patient079A1 | Patient141F |
| 11305 | Patient079A1 | Patient230G |
| 11305 | Patient079A1 | Patient261G |
| 11305 | Patient093C  | Patient220B |
| 11305 | Patient093E  | Patient161B |
| 11305 | Patient094B  | Patient161B |
| 11305 | Patient094D  | Patient161B |
| 11305 | Patient109C  | Patient261G |
| 11305 | Patient141F  | Patient236B |
| 11305 | Patient141G  | Patient232A |
| 11305 | Patient141G  | Patient232C |
| 11305 | Patient145B  | Patient220A |
| 11305 | Patient145B  | Patient222B |
| 11305 | Patient145B  | Patient252B |
| 11305 | Patient176   | Patient232B |
| 11305 | Patient189B  | Patient230D |
| 11306 | Patient026D  | Patient104B |

|       |              |              |
|-------|--------------|--------------|
| 11306 | Patient026F  | Patient094E  |
| 11306 | Patient032C  | Patient097A  |
| 11306 | Patient032C  | Patient104A  |
| 11306 | Patient032D  | Patient079A1 |
| 11306 | Patient045A  | Patient094B  |
| 11306 | Patient066D  | Patient093D  |
| 11306 | Patient066E  | Patient093A  |
| 11306 | Patient066E  | Patient094D  |
| 11306 | Patient066F  | Patient093D  |
| 11306 | Patient066F  | Patient094D  |
| 11306 | Patient079A2 | Patient141F  |
| 11306 | Patient079A2 | Patient230G  |
| 11306 | Patient079A2 | Patient261G  |
| 11306 | Patient079B  | Patient230C  |
| 11306 | Patient081C  | Patient236B  |
| 11306 | Patient094A  | Patient150B  |
| 11306 | Patient094C  | Patient123C  |
| 11306 | Patient094C  | Patient183A  |
| 11306 | Patient094C  | Patient261D  |
| 11306 | Patient094D  | Patient123D  |
| 11306 | Patient094E  | Patient150A  |
| 11306 | Patient097D  | Patient145B  |
| 11306 | Patient109D  | Patient230C  |
| 11306 | Patient141G  | Patient232E  |
| 11306 | Patient141G  | Patient246B  |
| 11306 | Patient141G  | Patient263B  |
| 11306 | Patient177   | Patient247D  |
| 11306 | Patient213B  | Patient261E  |
| 11306 | Patient218B  | Patient230G  |
| 11306 | Patient218B  | Patient261G  |
| 11306 | Patient230C  | Patient236A  |
| 11307 | Patient021A2 | Patient164   |
| 11307 | Patient026A  | Patient093A  |
| 11307 | Patient026B  | Patient093D  |
| 11307 | Patient026B  | Patient093E  |
| 11307 | Patient026B  | Patient094B  |
| 11307 | Patient026B  | Patient094D  |
| 11307 | Patient032A  | Patient126D  |
| 11307 | Patient032C  | Patient097E  |
| 11307 | Patient032C  | Patient252A  |
| 11307 | Patient032D  | Patient079A2 |
| 11307 | Patient032D  | Patient097D  |
| 11307 | Patient032E  | Patient097D  |
| 11307 | Patient045A  | Patient093E  |
| 11307 | Patient053A1 | Patient097A  |
| 11307 | Patient066D  | Patient093E  |
| 11307 | Patient066D  | Patient094B  |
| 11307 | Patient066E  | Patient093D  |
| 11307 | Patient066F  | Patient093E  |
| 11307 | Patient081D  | Patient220A  |

|       |             |             |
|-------|-------------|-------------|
| 11307 | Patient093A | Patient123D |
| 11307 | Patient093A | Patient183D |
| 11307 | Patient093B | Patient183C |
| 11307 | Patient093C | Patient230B |
| 11307 | Patient094C | Patient123B |
| 11307 | Patient094E | Patient141D |
| 11307 | Patient094E | Patient145A |
| 11307 | Patient099B | Patient230C |
| 11307 | Patient099E | Patient145B |
| 11307 | Patient103D | Patient205  |
| 11307 | Patient108G | Patient261G |
| 11307 | Patient109C | Patient230G |
| 11307 | Patient131  | Patient176  |
| 11307 | Patient141F | Patient218B |
| 11307 | Patient176  | Patient232E |
| 11307 | Patient183B | Patient247D |
| 11307 | Patient183E | Patient247D |
| 11307 | Patient187  | Patient261G |
| 11308 | Patient023  | Patient032A |
| 11308 | Patient023  | Patient261C |
| 11308 | Patient026A | Patient093D |
| 11308 | Patient026A | Patient093E |
| 11308 | Patient026A | Patient094B |
| 11308 | Patient026A | Patient094D |
| 11308 | Patient026E | Patient213B |
| 11308 | Patient026F | Patient094C |
| 11308 | Patient032C | Patient222B |
| 11308 | Patient032D | Patient108A |
| 11308 | Patient032D | Patient218B |
| 11308 | Patient032D | Patient236B |
| 11308 | Patient032E | Patient099E |
| 11308 | Patient045A | Patient247D |
| 11308 | Patient045C | Patient094D |
| 11308 | Patient066E | Patient093E |
| 11308 | Patient066E | Patient094B |
| 11308 | Patient066F | Patient094B |
| 11308 | Patient081C | Patient099E |
| 11308 | Patient081C | Patient104A |
| 11308 | Patient081C | Patient218A |
| 11308 | Patient092C | Patient263A |
| 11308 | Patient093B | Patient230A |
| 11308 | Patient093C | Patient230F |
| 11308 | Patient093D | Patient123D |
| 11308 | Patient094A | Patient183C |
| 11308 | Patient094C | Patient141D |
| 11308 | Patient094C | Patient145A |
| 11308 | Patient094C | Patient150A |
| 11308 | Patient094D | Patient183D |
| 11308 | Patient094E | Patient206  |
| 11308 | Patient099A | Patient230C |

|       |              |             |
|-------|--------------|-------------|
| 11308 | Patient099C  | Patient230C |
| 11308 | Patient104A  | Patient261G |
| 11308 | Patient108F  | Patient230C |
| 11308 | Patient108H  | Patient261G |
| 11308 | Patient109C  | Patient141F |
| 11308 | Patient146   | Patient251  |
| 11308 | Patient176   | Patient232A |
| 11308 | Patient176   | Patient232C |
| 11309 | Patient026C  | Patient126D |
| 11309 | Patient026D  | Patient252D |
| 11309 | Patient032C  | Patient220A |
| 11309 | Patient032D  | Patient187  |
| 11309 | Patient032E  | Patient252F |
| 11309 | Patient045A  | Patient094E |
| 11309 | Patient045B  | Patient093A |
| 11309 | Patient045B  | Patient094D |
| 11309 | Patient045C  | Patient093A |
| 11309 | Patient079C  | Patient145B |
| 11309 | Patient081D  | Patient222B |
| 11309 | Patient093A  | Patient120A |
| 11309 | Patient093E  | Patient123D |
| 11309 | Patient093E  | Patient183D |
| 11309 | Patient094B  | Patient123D |
| 11309 | Patient094B  | Patient183D |
| 11309 | Patient108B1 | Patient141F |
| 11309 | Patient108B1 | Patient261G |
| 11309 | Patient108B2 | Patient261G |
| 11309 | Patient108G  | Patient141F |
| 11309 | Patient108G  | Patient230G |
| 11309 | Patient109A  | Patient230C |
| 11309 | Patient109E  | Patient261G |
| 11309 | Patient126D  | Patient261A |
| 11309 | Patient141G  | Patient247A |
| 11309 | Patient150A  | Patient247D |
| 11309 | Patient176   | Patient232D |
| 11309 | Patient187   | Patient230G |
| 11309 | Patient230C  | Patient265  |
| 11310 | Patient021A1 | Patient164  |
| 11310 | Patient026B  | Patient094E |
| 11310 | Patient026D  | Patient104A |
| 11310 | Patient032C  | Patient252B |
| 11310 | Patient032E  | Patient079C |
| 11310 | Patient032E  | Patient218A |
| 11310 | Patient034A  | Patient126D |
| 11310 | Patient045A  | Patient094C |
| 11310 | Patient045C  | Patient093D |
| 11310 | Patient053A1 | Patient097E |
| 11310 | Patient066D  | Patient094E |
| 11310 | Patient066F  | Patient094E |
| 11310 | Patient081D  | Patient104B |



|       |              |             |
|-------|--------------|-------------|
| 11310 | Patient093B  | Patient141A |
| 11310 | Patient093B  | Patient141C |
| 11310 | Patient093C  | Patient192C |
| 11310 | Patient093D  | Patient120A |
| 11310 | Patient093D  | Patient183D |
| 11310 | Patient094E  | Patient161B |
| 11310 | Patient104B  | Patient261E |
| 11310 | Patient109E  | Patient141F |
| 11310 | Patient109E  | Patient230G |
| 11310 | Patient141F  | Patient187  |
| 11310 | Patient141G  | Patient232D |
| 11310 | Patient145B  | Patient252F |
| 11310 | Patient183A  | Patient213B |
| 11310 | Patient196A  | Patient230C |
| 11310 | Patient196C  | Patient230C |
| 11310 | Patient205   | Patient220B |
| 11310 | Patient222F  | Patient230C |
| 11311 | Patient026A  | Patient094E |
| 11311 | Patient026E  | Patient104B |
| 11311 | Patient032C  | Patient097D |
| 11311 | Patient032D  | Patient252A |
| 11311 | Patient032D  | Patient252B |
| 11311 | Patient034C  | Patient126D |
| 11311 | Patient034E  | Patient126D |
| 11311 | Patient045B  | Patient093D |
| 11311 | Patient045C  | Patient093E |
| 11311 | Patient045C  | Patient094B |
| 11311 | Patient093A  | Patient150B |
| 11311 | Patient093B  | Patient183B |
| 11311 | Patient093B  | Patient183E |
| 11311 | Patient094A  | Patient230A |
| 11311 | Patient094B  | Patient120A |
| 11311 | Patient094C  | Patient161B |
| 11311 | Patient094E  | Patient123D |
| 11311 | Patient097B  | Patient145B |
| 11311 | Patient097C  | Patient145B |
| 11311 | Patient108A  | Patient145B |
| 11311 | Patient108B1 | Patient230G |
| 11311 | Patient108B2 | Patient141F |
| 11311 | Patient108B2 | Patient230G |
| 11311 | Patient108H  | Patient141F |
| 11311 | Patient108H  | Patient230G |
| 11311 | Patient109B  | Patient230C |
| 11311 | Patient109D  | Patient261G |
| 11311 | Patient121A  | Patient232A |
| 11311 | Patient121A  | Patient232C |
| 11311 | Patient126A  | Patient210  |
| 11311 | Patient126D  | Patient145C |
| 11311 | Patient126E  | Patient141F |
| 11311 | Patient126E  | Patient230G |

|       |              |              |
|-------|--------------|--------------|
| 11311 | Patient141G  | Patient247B  |
| 11311 | Patient141G  | Patient247C  |
| 11311 | Patient145B  | Patient236B  |
| 11311 | Patient181B  | Patient210   |
| 11311 | Patient222E  | Patient230C  |
| 11312 | Patient023   | Patient034A  |
| 11312 | Patient023   | Patient034C  |
| 11312 | Patient023   | Patient034E  |
| 11312 | Patient023   | Patient261B  |
| 11312 | Patient026B  | Patient094C  |
| 11312 | Patient032C  | Patient099E  |
| 11312 | Patient032D  | Patient097B  |
| 11312 | Patient032E  | Patient097B  |
| 11312 | Patient032E  | Patient097C  |
| 11312 | Patient032E  | Patient108A  |
| 11312 | Patient045B  | Patient093E  |
| 11312 | Patient045B  | Patient094B  |
| 11312 | Patient053A1 | Patient220A  |
| 11312 | Patient066D  | Patient094C  |
| 11312 | Patient066E  | Patient094E  |
| 11312 | Patient066F  | Patient094C  |
| 11312 | Patient079A1 | Patient145B  |
| 11312 | Patient081D  | Patient236B  |
| 11312 | Patient092G  | Patient108B1 |
| 11312 | Patient092G  | Patient108B2 |
| 11312 | Patient092G  | Patient232B  |
| 11312 | Patient093B  | Patient141B  |
| 11312 | Patient093C  | Patient192A  |
| 11312 | Patient093D  | Patient150B  |
| 11312 | Patient093E  | Patient120A  |
| 11312 | Patient094A  | Patient183B  |
| 11312 | Patient094A  | Patient183E  |
| 11312 | Patient094D  | Patient150B  |
| 11312 | Patient094D  | Patient183C  |
| 11312 | Patient099D  | Patient230C  |
| 11312 | Patient103E  | Patient205   |
| 11312 | Patient121A  | Patient232E  |
| 11312 | Patient121B  | Patient232A  |
| 11312 | Patient121B  | Patient232C  |
| 11312 | Patient126E  | Patient261G  |
| 11312 | Patient131   | Patient206   |
| 11312 | Patient131   | Patient258A1 |
| 11312 | Patient131   | Patient258D  |
| 11312 | Patient145B  | Patient218A  |
| 11312 | Patient196B  | Patient230C  |
| 11312 | Patient196E  | Patient230C  |
| 11312 | Patient222A  | Patient230C  |
| 11312 | Patient236A  | Patient261G  |
| 11313 | Patient026A  | Patient094C  |
| 11313 | Patient032C  | Patient218A  |

|       |              |              |
|-------|--------------|--------------|
| 11313 | Patient032C  | Patient252F  |
| 11313 | Patient032D  | Patient097C  |
| 11313 | Patient032D  | Patient108G  |
| 11313 | Patient032D  | Patient109C  |
| 11313 | Patient032E  | Patient079A1 |
| 11313 | Patient032E  | Patient236B  |
| 11313 | Patient045B  | Patient247D  |
| 11313 | Patient045C  | Patient247D  |
| 11313 | Patient053A1 | Patient097D  |
| 11313 | Patient066E  | Patient094C  |
| 11313 | Patient079A2 | Patient145B  |
| 11313 | Patient079B  | Patient141F  |
| 11313 | Patient081C  | Patient218B  |
| 11313 | Patient093A  | Patient183C  |
| 11313 | Patient093C  | Patient192B  |
| 11313 | Patient094A  | Patient141C  |
| 11313 | Patient094A  | Patient177   |
| 11313 | Patient094B  | Patient150B  |
| 11313 | Patient094E  | Patient183D  |
| 11313 | Patient108D  | Patient230C  |
| 11313 | Patient121B  | Patient232E  |
| 11313 | Patient126D  | Patient192D  |
| 11313 | Patient146   | Patient258F  |
| 11313 | Patient230G  | Patient236A  |
| 11313 | Patient252D  | Patient261E  |
| 11314 | Patient021A2 | Patient032D  |
| 11314 | Patient023   | Patient183D  |
| 11314 | Patient026E  | Patient252D  |
| 11314 | Patient032C  | Patient079C  |
| 11314 | Patient032D  | Patient109E  |
| 11314 | Patient032E  | Patient079A2 |
| 11314 | Patient032E  | Patient218B  |
| 11314 | Patient034D  | Patient126D  |
| 11314 | Patient045C  | Patient094E  |
| 11314 | Patient053A1 | Patient236B  |
| 11314 | Patient053C  | Patient126E  |
| 11314 | Patient079B  | Patient230G  |
| 11314 | Patient079B  | Patient261G  |
| 11314 | Patient081C  | Patient126E  |
| 11314 | Patient081D  | Patient099E  |
| 11314 | Patient081D  | Patient104A  |
| 11314 | Patient081D  | Patient218A  |
| 11314 | Patient093D  | Patient183C  |
| 11314 | Patient093E  | Patient150B  |
| 11314 | Patient094A  | Patient141A  |
| 11314 | Patient094C  | Patient123D  |
| 11314 | Patient097E  | Patient261E  |
| 11314 | Patient099B  | Patient261G  |
| 11314 | Patient104A  | Patient261E  |
| 11314 | Patient108F  | Patient261G  |

|       |              |              |
|-------|--------------|--------------|
| 11314 | Patient109A  | Patient261G  |
| 11314 | Patient109C  | Patient145B  |
| 11314 | Patient109D  | Patient141F  |
| 11314 | Patient109D  | Patient230G  |
| 11314 | Patient120D  | Patient204   |
| 11314 | Patient126D  | Patient161B  |
| 11314 | Patient141G  | Patient246E  |
| 11314 | Patient146   | Patient258D  |
| 11314 | Patient206   | Patient252B  |
| 11314 | Patient222D  | Patient230C  |
| 11314 | Patient235A  | Patient247D  |
| 11314 | Patient252A  | Patient261E  |
| 11315 | Patient023   | Patient034D  |
| 11315 | Patient023   | Patient145C  |
| 11315 | Patient023   | Patient176   |
| 11315 | Patient026E  | Patient104A  |
| 11315 | Patient032D  | Patient108H  |
| 11315 | Patient032D  | Patient252F  |
| 11315 | Patient045B  | Patient094E  |
| 11315 | Patient045D  | Patient053C  |
| 11315 | Patient045D  | Patient241   |
| 11315 | Patient053A2 | Patient126E  |
| 11315 | Patient053B  | Patient126E  |
| 11315 | Patient081C  | Patient187   |
| 11315 | Patient093A  | Patient230A  |
| 11315 | Patient093B  | Patient230D  |
| 11315 | Patient093B  | Patient230E  |
| 11315 | Patient093E  | Patient183C  |
| 11315 | Patient094A  | Patient141B  |
| 11315 | Patient094B  | Patient183C  |
| 11315 | Patient094C  | Patient183D  |
| 11315 | Patient094D  | Patient230A  |
| 11315 | Patient097A  | Patient261E  |
| 11315 | Patient099A  | Patient261G  |
| 11315 | Patient099B  | Patient141F  |
| 11315 | Patient099B  | Patient230G  |
| 11315 | Patient099C  | Patient261G  |
| 11315 | Patient131   | Patient258B  |
| 11315 | Patient131   | Patient258G  |
| 11315 | Patient141F  | Patient236A  |
| 11315 | Patient141G  | Patient246D  |
| 11315 | Patient146   | Patient258A1 |
| 11315 | Patient206   | Patient252A  |
| 11316 | Patient021A1 | Patient032D  |
| 11316 | Patient026D  | Patient220A  |
| 11316 | Patient032C  | Patient097B  |
| 11316 | Patient032C  | Patient108A  |
| 11316 | Patient032D  | Patient079B  |
| 11316 | Patient032D  | Patient196A  |
| 11316 | Patient032D  | Patient196C  |

|       |              |              |
|-------|--------------|--------------|
| 11316 | Patient045B  | Patient094C  |
| 11316 | Patient045C  | Patient094C  |
| 11316 | Patient045D  | Patient053B  |
| 11316 | Patient053A1 | Patient097B  |
| 11316 | Patient053A1 | Patient218A  |
| 11316 | Patient093A  | Patient141C  |
| 11316 | Patient093D  | Patient230A  |
| 11316 | Patient094C  | Patient120A  |
| 11316 | Patient094D  | Patient183B  |
| 11316 | Patient094D  | Patient183E  |
| 11316 | Patient094E  | Patient150B  |
| 11316 | Patient099A  | Patient141F  |
| 11316 | Patient099A  | Patient230G  |
| 11316 | Patient099C  | Patient141F  |
| 11316 | Patient099C  | Patient230G  |
| 11316 | Patient108F  | Patient141F  |
| 11316 | Patient108F  | Patient230G  |
| 11316 | Patient108G  | Patient145B  |
| 11316 | Patient109B  | Patient261G  |
| 11316 | Patient109E  | Patient145B  |
| 11316 | Patient120B  | Patient204   |
| 11316 | Patient121A  | Patient131   |
| 11316 | Patient126D  | Patient261C  |
| 11316 | Patient127A  | Patient230C  |
| 11316 | Patient131   | Patient258F  |
| 11316 | Patient141F  | Patient196A  |
| 11316 | Patient141F  | Patient196C  |
| 11316 | Patient141F  | Patient222A  |
| 11316 | Patient145B  | Patient218B  |
| 11316 | Patient146   | Patient258G  |
| 11316 | Patient161B  | Patient247D  |
| 11316 | Patient173B  | Patient232B  |
| 11316 | Patient181A  | Patient210   |
| 11316 | Patient201B  | Patient230C  |
| 11316 | Patient261G  | Patient265   |
| 11317 | Patient022B  | Patient247D  |
| 11317 | Patient032C  | Patient079A1 |
| 11317 | Patient032C  | Patient097C  |
| 11317 | Patient032C  | Patient218B  |
| 11317 | Patient032C  | Patient236B  |
| 11317 | Patient032D  | Patient099B  |
| 11317 | Patient032D  | Patient236A  |
| 11317 | Patient032E  | Patient108G  |
| 11317 | Patient032E  | Patient109C  |
| 11317 | Patient045D  | Patient053A2 |
| 11317 | Patient053A1 | Patient108A  |
| 11317 | Patient053A1 | Patient196F  |
| 11317 | Patient093A  | Patient141A  |
| 11317 | Patient093A  | Patient183B  |
| 11317 | Patient093A  | Patient183E  |

|       |              |              |
|-------|--------------|--------------|
| 11317 | Patient093E  | Patient230A  |
| 11317 | Patient094B  | Patient230A  |
| 11317 | Patient094D  | Patient141A  |
| 11317 | Patient094E  | Patient183C  |
| 11317 | Patient108B1 | Patient145B  |
| 11317 | Patient108B2 | Patient145B  |
| 11317 | Patient109A  | Patient141F  |
| 11317 | Patient109A  | Patient230G  |
| 11317 | Patient121A  | Patient232D  |
| 11317 | Patient121B  | Patient131   |
| 11317 | Patient131   | Patient258A2 |
| 11317 | Patient141F  | Patient265   |
| 11317 | Patient196A  | Patient261G  |
| 11317 | Patient196C  | Patient261G  |
| 11317 | Patient220A  | Patient261E  |
| 11317 | Patient222F  | Patient261G  |
| 11317 | Patient230G  | Patient265   |
| 11317 | Patient252B  | Patient261E  |
| 11318 | Patient021A2 | Patient026D  |
| 11318 | Patient023   | Patient034B  |
| 11318 | Patient023   | Patient261D  |
| 11318 | Patient026D  | Patient099E  |
| 11318 | Patient032C  | Patient079A2 |
| 11318 | Patient032D  | Patient099A  |
| 11318 | Patient032D  | Patient099C  |
| 11318 | Patient032D  | Patient109D  |
| 11318 | Patient032D  | Patient196B  |
| 11318 | Patient032D  | Patient196E  |
| 11318 | Patient032D  | Patient222A  |
| 11318 | Patient032D  | Patient222F  |
| 11318 | Patient032E  | Patient108B1 |
| 11318 | Patient032E  | Patient108B2 |
| 11318 | Patient032E  | Patient109E  |
| 11318 | Patient032E  | Patient187   |
| 11318 | Patient074B  | Patient205   |
| 11318 | Patient081C  | Patient236A  |
| 11318 | Patient081E  | Patient126E  |
| 11318 | Patient093B  | Patient126C  |
| 11318 | Patient093D  | Patient141A  |
| 11318 | Patient093D  | Patient141C  |
| 11318 | Patient093D  | Patient183B  |
| 11318 | Patient093D  | Patient183E  |
| 11318 | Patient094A  | Patient230D  |
| 11318 | Patient094C  | Patient150B  |
| 11318 | Patient094D  | Patient141C  |
| 11318 | Patient104B  | Patient183A  |
| 11318 | Patient108H  | Patient145B  |
| 11318 | Patient109B  | Patient141F  |
| 11318 | Patient109B  | Patient230G  |
| 11318 | Patient121B  | Patient232D  |

|       |              |              |
|-------|--------------|--------------|
| 11318 | Patient123A  | Patient126D  |
| 11318 | Patient127B  | Patient230C  |
| 11318 | Patient141F  | Patient196B  |
| 11318 | Patient141F  | Patient196E  |
| 11318 | Patient183D  | Patient213B  |
| 11318 | Patient196A  | Patient230G  |
| 11318 | Patient196C  | Patient230G  |
| 11318 | Patient201E  | Patient230C  |
| 11318 | Patient222A  | Patient230G  |
| 11318 | Patient222A  | Patient261G  |
| 11318 | Patient222F  | Patient230G  |
| 11319 | Patient021A2 | Patient241   |
| 11319 | Patient023   | Patient183C  |
| 11319 | Patient032D  | Patient109A  |
| 11319 | Patient032D  | Patient222E  |
| 11319 | Patient032D  | Patient265   |
| 11319 | Patient032E  | Patient108H  |
| 11319 | Patient032E  | Patient126E  |
| 11319 | Patient034B  | Patient126D  |
| 11319 | Patient053A1 | Patient079C  |
| 11319 | Patient053A1 | Patient097C  |
| 11319 | Patient053A1 | Patient099E  |
| 11319 | Patient081C  | Patient265   |
| 11319 | Patient081D  | Patient218B  |
| 11319 | Patient093A  | Patient141B  |
| 11319 | Patient093E  | Patient141A  |
| 11319 | Patient093E  | Patient141C  |
| 11319 | Patient093E  | Patient183B  |
| 11319 | Patient093E  | Patient183E  |
| 11319 | Patient094A  | Patient230E  |
| 11319 | Patient094B  | Patient183B  |
| 11319 | Patient094B  | Patient183E  |
| 11319 | Patient094D  | Patient141B  |
| 11319 | Patient099D  | Patient261G  |
| 11319 | Patient100A  | Patient235F  |
| 11319 | Patient108D  | Patient261G  |
| 11319 | Patient120C  | Patient204   |
| 11319 | Patient126D  | Patient261B  |
| 11319 | Patient126E  | Patient145B  |
| 11319 | Patient141F  | Patient222E  |
| 11319 | Patient141F  | Patient222F  |
| 11319 | Patient145B  | Patient187   |
| 11319 | Patient146   | Patient258A2 |
| 11319 | Patient146   | Patient258B  |
| 11319 | Patient149B  | Patient230C  |
| 11319 | Patient150B  | Patient247D  |
| 11319 | Patient184   | Patient230C  |
| 11319 | Patient196B  | Patient261G  |
| 11319 | Patient196E  | Patient261G  |
| 11319 | Patient213B  | Patient261C  |

|       |              |             |
|-------|--------------|-------------|
| 11319 | Patient222B  | Patient261E |
| 11319 | Patient222E  | Patient230G |
| 11319 | Patient222E  | Patient261G |
| 11319 | Patient230C  | Patient232B |
| 11319 | Patient230C  | Patient247E |
| 11320 | Patient026D  | Patient218A |
| 11320 | Patient032B  | Patient126E |
| 11320 | Patient032D  | Patient099D |
| 11320 | Patient032D  | Patient108F |
| 11320 | Patient074B  | Patient210  |
| 11320 | Patient081D  | Patient126E |
| 11320 | Patient092H  | Patient093C |
| 11320 | Patient093B  | Patient220B |
| 11320 | Patient093D  | Patient141B |
| 11320 | Patient094B  | Patient141A |
| 11320 | Patient094B  | Patient141C |
| 11320 | Patient094C  | Patient183C |
| 11320 | Patient094E  | Patient230A |
| 11320 | Patient097D  | Patient261E |
| 11320 | Patient099D  | Patient141F |
| 11320 | Patient099D  | Patient230G |
| 11320 | Patient109D  | Patient145B |
| 11320 | Patient141F  | Patient201B |
| 11320 | Patient141F  | Patient247E |
| 11320 | Patient145B  | Patient236A |
| 11320 | Patient196B  | Patient230G |
| 11320 | Patient196E  | Patient230G |
| 11320 | Patient220B  | Patient247D |
| 11321 | Patient021A1 | Patient026D |
| 11321 | Patient026E  | Patient220A |
| 11321 | Patient032C  | Patient108G |
| 11321 | Patient032C  | Patient109C |
| 11321 | Patient032C  | Patient187  |
| 11321 | Patient032D  | Patient109B |
| 11321 | Patient032D  | Patient222D |
| 11321 | Patient053A1 | Patient218B |
| 11321 | Patient074A  | Patient205  |
| 11321 | Patient074D  | Patient205  |
| 11321 | Patient079B  | Patient145B |
| 11321 | Patient081C  | Patient099B |
| 11321 | Patient081D  | Patient187  |
| 11321 | Patient092G  | Patient232A |
| 11321 | Patient092G  | Patient232C |
| 11321 | Patient093B  | Patient230B |
| 11321 | Patient093C  | Patient192E |
| 11321 | Patient093D  | Patient220B |
| 11321 | Patient093E  | Patient141B |
| 11321 | Patient094A  | Patient126C |
| 11321 | Patient094A  | Patient181B |
| 11321 | Patient094E  | Patient183B |



|       |              |              |
|-------|--------------|--------------|
| 11321 | Patient099B  | Patient145B  |
| 11321 | Patient104A  | Patient183A  |
| 11321 | Patient108D  | Patient141F  |
| 11321 | Patient108D  | Patient230G  |
| 11321 | Patient123C  | Patient126D  |
| 11321 | Patient126E  | Patient141D  |
| 11321 | Patient141F  | Patient222D  |
| 11321 | Patient183A  | Patient252D  |
| 11321 | Patient196D  | Patient230C  |
| 11321 | Patient201A  | Patient230C  |
| 11321 | Patient201B  | Patient230G  |
| 11321 | Patient201B  | Patient261G  |
| 11321 | Patient218A  | Patient261E  |
| 11321 | Patient222C  | Patient235F  |
| 11321 | Patient222D  | Patient230G  |
| 11322 | Patient023   | Patient183E  |
| 11322 | Patient032C  | Patient108B1 |
| 11322 | Patient032C  | Patient108B2 |
| 11322 | Patient032C  | Patient109E  |
| 11322 | Patient032E  | Patient079B  |
| 11322 | Patient032E  | Patient099B  |
| 11322 | Patient032E  | Patient109D  |
| 11322 | Patient032E  | Patient236A  |
| 11322 | Patient053A1 | Patient079A1 |
| 11322 | Patient053A1 | Patient108G  |
| 11322 | Patient053A1 | Patient187   |
| 11322 | Patient053A1 | Patient222C  |
| 11322 | Patient074C  | Patient205   |
| 11322 | Patient081C  | Patient099A  |
| 11322 | Patient081C  | Patient099C  |
| 11322 | Patient081C  | Patient196A  |
| 11322 | Patient081C  | Patient196C  |
| 11322 | Patient081C  | Patient247E  |
| 11322 | Patient081F  | Patient126E  |
| 11322 | Patient092G  | Patient232E  |
| 11322 | Patient093A  | Patient177   |
| 11322 | Patient093A  | Patient230D  |
| 11322 | Patient093A  | Patient230E  |
| 11322 | Patient093D  | Patient230D  |
| 11322 | Patient094B  | Patient141B  |
| 11322 | Patient094C  | Patient230A  |
| 11322 | Patient094D  | Patient230D  |
| 11322 | Patient094E  | Patient183E  |
| 11322 | Patient099A  | Patient145B  |
| 11322 | Patient099C  | Patient145B  |
| 11322 | Patient099E  | Patient261E  |
| 11322 | Patient104B  | Patient261C  |
| 11322 | Patient145B  | Patient265   |
| 11322 | Patient159   | Patient235A  |
| 11322 | Patient196F  | Patient235F  |

|       |              |              |
|-------|--------------|--------------|
| 11322 | Patient222D  | Patient261G  |
| 11322 | Patient230C  | Patient246A  |
| 11322 | Patient230G  | Patient247E  |
| 11322 | Patient252F  | Patient261E  |
| 11323 | Patient021A1 | Patient241   |
| 11323 | Patient021A2 | Patient026E  |
| 11323 | Patient023   | Patient123A  |
| 11323 | Patient023   | Patient183B  |
| 11323 | Patient026D  | Patient218B  |
| 11323 | Patient026D  | Patient236B  |
| 11323 | Patient026E  | Patient099E  |
| 11323 | Patient032C  | Patient108H  |
| 11323 | Patient032C  | Patient126E  |
| 11323 | Patient032D  | Patient201B  |
| 11323 | Patient032E  | Patient099A  |
| 11323 | Patient032E  | Patient099C  |
| 11323 | Patient032E  | Patient196A  |
| 11323 | Patient032E  | Patient196C  |
| 11323 | Patient053A1 | Patient079A2 |
| 11323 | Patient053A1 | Patient109C  |
| 11323 | Patient074A  | Patient210   |
| 11323 | Patient074C  | Patient210   |
| 11323 | Patient081B  | Patient126E  |
| 11323 | Patient081C  | Patient222A  |
| 11323 | Patient081C  | Patient222F  |
| 11323 | Patient086C  | Patient100A  |
| 11323 | Patient093B  | Patient230F  |
| 11323 | Patient093D  | Patient230E  |
| 11323 | Patient094C  | Patient141C  |
| 11323 | Patient094D  | Patient230E  |
| 11323 | Patient094E  | Patient141A  |
| 11323 | Patient094E  | Patient141C  |
| 11323 | Patient097B  | Patient261E  |
| 11323 | Patient097C  | Patient261E  |
| 11323 | Patient100A  | Patient235E  |
| 11323 | Patient108F  | Patient145B  |
| 11323 | Patient109A  | Patient145B  |
| 11323 | Patient123B  | Patient126D  |
| 11323 | Patient126C  | Patient126D  |
| 11323 | Patient127A  | Patient141F  |
| 11323 | Patient127A  | Patient261G  |
| 11323 | Patient127B  | Patient141F  |
| 11323 | Patient157   | Patient213A  |
| 11323 | Patient173B  | Patient232A  |
| 11323 | Patient173B  | Patient232C  |
| 11323 | Patient213B  | Patient230D  |
| 11323 | Patient230C  | Patient246C  |
| 11323 | Patient230C  | Patient263B  |
| 11323 | Patient236B  | Patient261E  |
| 11323 | Patient247E  | Patient261G  |

|       |              |              |
|-------|--------------|--------------|
| 11323 | Patient252D  | Patient261C  |
| 11324 | Patient032E  | Patient108F  |
| 11324 | Patient032E  | Patient109A  |
| 11324 | Patient032E  | Patient222F  |
| 11324 | Patient053A1 | Patient189E  |
| 11324 | Patient053A1 | Patient236A  |
| 11324 | Patient074D  | Patient210   |
| 11324 | Patient081C  | Patient196B  |
| 11324 | Patient081C  | Patient196E  |
| 11324 | Patient081D  | Patient236A  |
| 11324 | Patient093A  | Patient126C  |
| 11324 | Patient093D  | Patient177   |
| 11324 | Patient093E  | Patient230D  |
| 11324 | Patient093E  | Patient230E  |
| 11324 | Patient094A  | Patient181A  |
| 11324 | Patient094A  | Patient230B  |
| 11324 | Patient094B  | Patient230D  |
| 11324 | Patient094C  | Patient183B  |
| 11324 | Patient094C  | Patient183E  |
| 11324 | Patient109B  | Patient145B  |
| 11324 | Patient126D  | Patient261D  |
| 11324 | Patient127A  | Patient230G  |
| 11324 | Patient173B  | Patient232E  |
| 11324 | Patient230C  | Patient232A  |
| 11324 | Patient230C  | Patient232C  |
| 11324 | Patient232B  | Patient261G  |
| 11325 | Patient026D  | Patient222B  |
| 11325 | Patient026E  | Patient218A  |
| 11325 | Patient032C  | Patient196C  |
| 11325 | Patient032D  | Patient108D  |
| 11325 | Patient032D  | Patient127A  |
| 11325 | Patient032E  | Patient196B  |
| 11325 | Patient032E  | Patient196E  |
| 11325 | Patient032E  | Patient222A  |
| 11325 | Patient032E  | Patient265   |
| 11325 | Patient038   | Patient103D  |
| 11325 | Patient045D  | Patient081C  |
| 11325 | Patient053A1 | Patient108H  |
| 11325 | Patient053A1 | Patient109E  |
| 11325 | Patient053A1 | Patient189A  |
| 11325 | Patient053C  | Patient108B1 |
| 11325 | Patient053C  | Patient108B2 |
| 11325 | Patient079A1 | Patient261E  |
| 11325 | Patient079C  | Patient261E  |
| 11325 | Patient081A2 | Patient126E  |
| 11325 | Patient081C  | Patient222E  |
| 11325 | Patient081C  | Patient232B  |
| 11325 | Patient093A  | Patient220B  |
| 11325 | Patient093B  | Patient192C  |
| 11325 | Patient093D  | Patient126C  |

|       |              |              |
|-------|--------------|--------------|
| 11325 | Patient094A  | Patient220B  |
| 11325 | Patient094A  | Patient224B  |
| 11325 | Patient094A  | Patient230F  |
| 11325 | Patient094B  | Patient126C  |
| 11325 | Patient094B  | Patient177   |
| 11325 | Patient094B  | Patient220B  |
| 11325 | Patient094B  | Patient230E  |
| 11325 | Patient094D  | Patient126C  |
| 11325 | Patient094E  | Patient141B  |
| 11325 | Patient097A  | Patient261C  |
| 11325 | Patient127B  | Patient261G  |
| 11325 | Patient131   | Patient235F  |
| 11325 | Patient141F  | Patient232B  |
| 11325 | Patient145B  | Patient196A  |
| 11325 | Patient145B  | Patient222A  |
| 11325 | Patient145B  | Patient222F  |
| 11325 | Patient183C  | Patient213B  |
| 11325 | Patient184   | Patient261G  |
| 11325 | Patient206   | Patient213B  |
| 11325 | Patient210   | Patient224A  |
| 11325 | Patient210   | Patient224B  |
| 11325 | Patient218B  | Patient261E  |
| 11325 | Patient222C  | Patient235C  |
| 11325 | Patient222C  | Patient235E  |
| 11325 | Patient230C  | Patient232E  |
| 11325 | Patient230G  | Patient232B  |
| 11325 | Patient235F  | Patient263A  |
| 11326 | Patient021A1 | Patient026E  |
| 11326 | Patient023   | Patient123C  |
| 11326 | Patient032C  | Patient079B  |
| 11326 | Patient032C  | Patient099B  |
| 11326 | Patient032C  | Patient109D  |
| 11326 | Patient032D  | Patient127B  |
| 11326 | Patient032E  | Patient109B  |
| 11326 | Patient032E  | Patient222E  |
| 11326 | Patient053A1 | Patient189B  |
| 11326 | Patient053A2 | Patient108B1 |
| 11326 | Patient053A2 | Patient108B2 |
| 11326 | Patient053A2 | Patient232B  |
| 11326 | Patient053B  | Patient108B1 |
| 11326 | Patient053B  | Patient108B2 |
| 11326 | Patient053B  | Patient232B  |
| 11326 | Patient053C  | Patient196F  |
| 11326 | Patient053C  | Patient232B  |
| 11326 | Patient074E  | Patient205   |
| 11326 | Patient079A2 | Patient261E  |
| 11326 | Patient081C  | Patient222D  |
| 11326 | Patient081D  | Patient265   |
| 11326 | Patient093B  | Patient192A  |
| 11326 | Patient093E  | Patient126C  |

|       |              |             |
|-------|--------------|-------------|
| 11326 | Patient093E  | Patient177  |
| 11326 | Patient094A  | Patient192A |
| 11326 | Patient094A  | Patient192C |
| 11326 | Patient094C  | Patient141A |
| 11326 | Patient094C  | Patient141B |
| 11326 | Patient097E  | Patient183A |
| 11326 | Patient097E  | Patient261C |
| 11326 | Patient099D  | Patient145B |
| 11326 | Patient103B  | Patient210  |
| 11326 | Patient104A  | Patient261C |
| 11326 | Patient127B  | Patient230G |
| 11326 | Patient141F  | Patient196D |
| 11326 | Patient141F  | Patient201E |
| 11326 | Patient145B  | Patient196C |
| 11326 | Patient145B  | Patient222E |
| 11326 | Patient183A  | Patient220A |
| 11326 | Patient196F  | Patient235E |
| 11326 | Patient201E  | Patient261G |
| 11326 | Patient206   | Patient252F |
| 11326 | Patient210   | Patient213A |
| 11326 | Patient252A  | Patient261C |
| 11327 | Patient032C  | Patient099A |
| 11327 | Patient032C  | Patient099C |
| 11327 | Patient032C  | Patient236A |
| 11327 | Patient032D  | Patient157  |
| 11327 | Patient032D  | Patient196D |
| 11327 | Patient032D  | Patient201E |
| 11327 | Patient032D  | Patient246A |
| 11327 | Patient032E  | Patient099D |
| 11327 | Patient053A1 | Patient252A |
| 11327 | Patient053A2 | Patient196F |
| 11327 | Patient053B  | Patient196F |
| 11327 | Patient054   | Patient220B |
| 11327 | Patient081C  | Patient127A |
| 11327 | Patient081C  | Patient201B |
| 11327 | Patient081D  | Patient099B |
| 11327 | Patient093B  | Patient192B |
| 11327 | Patient093E  | Patient220B |
| 11327 | Patient094E  | Patient230D |
| 11327 | Patient094E  | Patient230E |
| 11327 | Patient097A  | Patient183A |
| 11327 | Patient109C  | Patient261E |
| 11327 | Patient141F  | Patient184  |
| 11327 | Patient149B  | Patient230G |
| 11327 | Patient149B  | Patient261G |
| 11327 | Patient183A  | Patient218A |
| 11327 | Patient183D  | Patient252D |
| 11327 | Patient184   | Patient230G |
| 11327 | Patient196F  | Patient235C |
| 11327 | Patient201E  | Patient230G |

|       |              |             |
|-------|--------------|-------------|
| 11327 | Patient206   | Patient222B |
| 11327 | Patient230C  | Patient246B |
| 11328 | Patient023   | Patient123B |
| 11328 | Patient026D  | Patient187  |
| 11328 | Patient026E  | Patient218B |
| 11328 | Patient026E  | Patient236B |
| 11328 | Patient032C  | Patient108F |
| 11328 | Patient032C  | Patient196A |
| 11328 | Patient032C  | Patient222F |
| 11328 | Patient032D  | Patient247E |
| 11328 | Patient032E  | Patient222D |
| 11328 | Patient053A1 | Patient109A |
| 11328 | Patient053A1 | Patient196A |
| 11328 | Patient053A1 | Patient196C |
| 11328 | Patient053A1 | Patient222B |
| 11328 | Patient053A1 | Patient263A |
| 11328 | Patient081C  | Patient099D |
| 11328 | Patient081D  | Patient099A |
| 11328 | Patient081D  | Patient099C |
| 11328 | Patient081D  | Patient196A |
| 11328 | Patient081D  | Patient196C |
| 11328 | Patient081D  | Patient222F |
| 11328 | Patient081D  | Patient247E |
| 11328 | Patient092G  | Patient232D |
| 11328 | Patient093A  | Patient230B |
| 11328 | Patient093D  | Patient230B |
| 11328 | Patient094A  | Patient192B |
| 11328 | Patient094A  | Patient235F |
| 11328 | Patient094D  | Patient220B |
| 11328 | Patient094D  | Patient230B |
| 11328 | Patient104B  | Patient183D |
| 11328 | Patient108A  | Patient261E |
| 11328 | Patient108B1 | Patient141D |
| 11328 | Patient108D  | Patient145B |
| 11328 | Patient141F  | Patient149B |
| 11328 | Patient141F  | Patient246A |
| 11328 | Patient145B  | Patient196B |
| 11328 | Patient145B  | Patient196E |
| 11328 | Patient145B  | Patient201B |
| 11328 | Patient145B  | Patient222D |
| 11328 | Patient145B  | Patient247E |
| 11328 | Patient183B  | Patient213B |
| 11328 | Patient183E  | Patient213B |
| 11328 | Patient187   | Patient261E |
| 11328 | Patient196D  | Patient261G |
| 11328 | Patient222C  | Patient235A |
| 11328 | Patient230C  | Patient247A |
| 11329 | Patient026D  | Patient126E |
| 11329 | Patient026E  | Patient222B |
| 11329 | Patient032A  | Patient126E |

|       |              |              |
|-------|--------------|--------------|
| 11329 | Patient032B  | Patient108B1 |
| 11329 | Patient032B  | Patient108B2 |
| 11329 | Patient032C  | Patient109A  |
| 11329 | Patient032C  | Patient196B  |
| 11329 | Patient032C  | Patient196E  |
| 11329 | Patient032C  | Patient222A  |
| 11329 | Patient032C  | Patient265   |
| 11329 | Patient032E  | Patient108D  |
| 11329 | Patient053A1 | Patient109D  |
| 11329 | Patient053A1 | Patient252B  |
| 11329 | Patient074E  | Patient210   |
| 11329 | Patient079C  | Patient183A  |
| 11329 | Patient081C  | Patient127B  |
| 11329 | Patient081D  | Patient222A  |
| 11329 | Patient093A  | Patient230F  |
| 11329 | Patient094C  | Patient177   |
| 11329 | Patient094C  | Patient220B  |
| 11329 | Patient094C  | Patient230D  |
| 11329 | Patient094D  | Patient230F  |
| 11329 | Patient097D  | Patient261C  |
| 11329 | Patient099E  | Patient183A  |
| 11329 | Patient103C  | Patient210   |
| 11329 | Patient108A  | Patient183A  |
| 11329 | Patient131   | Patient235E  |
| 11329 | Patient141F  | Patient201A  |
| 11329 | Patient141F  | Patient246C  |
| 11329 | Patient173B  | Patient232D  |
| 11329 | Patient183A  | Patient218B  |
| 11329 | Patient196D  | Patient230G  |
| 11329 | Patient201A  | Patient230G  |
| 11329 | Patient201A  | Patient261G  |
| 11329 | Patient220A  | Patient261C  |
| 11329 | Patient222B  | Patient261C  |
| 11329 | Patient230D  | Patient252D  |
| 11329 | Patient235C  | Patient263A  |
| 11329 | Patient235E  | Patient263A  |
| 11329 | Patient252B  | Patient261C  |
| 11330 | Patient032C  | Patient109B  |
| 11330 | Patient032C  | Patient222D  |
| 11330 | Patient032C  | Patient222E  |
| 11330 | Patient032D  | Patient149B  |
| 11330 | Patient032D  | Patient201A  |
| 11330 | Patient032E  | Patient201B  |
| 11330 | Patient038   | Patient103E  |
| 11330 | Patient045A  | Patient213B  |
| 11330 | Patient053A1 | Patient109B  |
| 11330 | Patient053A1 | Patient196B  |
| 11330 | Patient053A1 | Patient196E  |
| 11330 | Patient053A1 | Patient222A  |
| 11330 | Patient053A1 | Patient222F  |

|       |              |             |
|-------|--------------|-------------|
| 11330 | Patient081A1 | Patient126E |
| 11330 | Patient081D  | Patient196B |
| 11330 | Patient081D  | Patient196E |
| 11330 | Patient081D  | Patient222E |
| 11330 | Patient081D  | Patient232B |
| 11330 | Patient081E  | Patient232B |
| 11330 | Patient093A  | Patient181B |
| 11330 | Patient093D  | Patient230F |
| 11330 | Patient093E  | Patient230B |
| 11330 | Patient094B  | Patient230B |
| 11330 | Patient094C  | Patient230E |
| 11330 | Patient094D  | Patient192C |
| 11330 | Patient094E  | Patient126C |
| 11330 | Patient104A  | Patient183D |
| 11330 | Patient104B  | Patient220B |
| 11330 | Patient108B1 | Patient261A |
| 11330 | Patient108B1 | Patient261E |
| 11330 | Patient108B2 | Patient141D |
| 11330 | Patient108B2 | Patient261A |
| 11330 | Patient108B2 | Patient261E |
| 11330 | Patient108G  | Patient261E |
| 11330 | Patient108H  | Patient261E |
| 11330 | Patient109E  | Patient261E |
| 11330 | Patient123D  | Patient126D |
| 11330 | Patient126D  | Patient145A |
| 11330 | Patient126D  | Patient183A |
| 11330 | Patient126E  | Patient261A |
| 11330 | Patient127A  | Patient145B |
| 11330 | Patient196F  | Patient235A |
| 11330 | Patient230C  | Patient247B |
| 11330 | Patient230C  | Patient247C |
| 11330 | Patient230G  | Patient246A |
| 11330 | Patient261G  | Patient263B |
| 11331 | Patient032C  | Patient099D |
| 11331 | Patient032D  | Patient263B |
| 11331 | Patient032E  | Patient127A |
| 11331 | Patient032E  | Patient232B |
| 11331 | Patient032E  | Patient247E |
| 11331 | Patient045D  | Patient081D |
| 11331 | Patient053A1 | Patient079B |
| 11331 | Patient053A1 | Patient108F |
| 11331 | Patient053A1 | Patient213B |
| 11331 | Patient053C  | Patient222C |
| 11331 | Patient092E  | Patient093C |
| 11331 | Patient093A  | Patient192A |
| 11331 | Patient093E  | Patient230F |
| 11331 | Patient094A  | Patient126A |
| 11331 | Patient094B  | Patient230F |
| 11331 | Patient094C  | Patient126C |
| 11331 | Patient094D  | Patient192A |



|       |              |             |
|-------|--------------|-------------|
| 11331 | Patient094E  | Patient220B |
| 11331 | Patient097D  | Patient183A |
| 11331 | Patient099E  | Patient261C |
| 11331 | Patient104B  | Patient183C |
| 11331 | Patient126E  | Patient261E |
| 11331 | Patient141F  | Patient246B |
| 11331 | Patient159   | Patient206  |
| 11331 | Patient206   | Patient252D |
| 11331 | Patient230G  | Patient246C |
| 11331 | Patient230G  | Patient263B |
| 11331 | Patient246A  | Patient261G |
| 11331 | Patient246C  | Patient261G |
| 11332 | Patient026D  | Patient099B |
| 11332 | Patient026D  | Patient236A |
| 11332 | Patient032B  | Patient232B |
| 11332 | Patient032D  | Patient184  |
| 11332 | Patient032D  | Patient246C |
| 11332 | Patient034A  | Patient126E |
| 11332 | Patient053A1 | Patient099B |
| 11332 | Patient053A1 | Patient201B |
| 11332 | Patient053A1 | Patient265  |
| 11332 | Patient053A2 | Patient222C |
| 11332 | Patient053B  | Patient222C |
| 11332 | Patient053C  | Patient232C |
| 11332 | Patient079A1 | Patient183A |
| 11332 | Patient079A2 | Patient183A |
| 11332 | Patient081B  | Patient232B |
| 11332 | Patient081C  | Patient184  |
| 11332 | Patient081C  | Patient246A |
| 11332 | Patient081C  | Patient246C |
| 11332 | Patient081D  | Patient201B |
| 11332 | Patient081D  | Patient222D |
| 11332 | Patient081F  | Patient232B |
| 11332 | Patient092A  | Patient093C |
| 11332 | Patient093A  | Patient192C |
| 11332 | Patient093A  | Patient224B |
| 11332 | Patient093C  | Patient192F |
| 11332 | Patient093D  | Patient181B |
| 11332 | Patient094A  | Patient235E |
| 11332 | Patient094D  | Patient192B |
| 11332 | Patient126E  | Patient145C |
| 11332 | Patient127B  | Patient145B |
| 11332 | Patient141F  | Patient232A |
| 11332 | Patient141F  | Patient232C |
| 11332 | Patient141F  | Patient263B |
| 11332 | Patient183A  | Patient236B |
| 11332 | Patient183C  | Patient252D |
| 11332 | Patient218A  | Patient261C |
| 11332 | Patient222C  | Patient235B |
| 11332 | Patient230C  | Patient232D |

|       |              |             |
|-------|--------------|-------------|
| 11332 | Patient230G  | Patient232A |
| 11332 | Patient230G  | Patient232C |
| 11332 | Patient232A  | Patient261G |
| 11332 | Patient232C  | Patient261G |
| 11332 | Patient232E  | Patient261G |
| 11332 | Patient235A  | Patient263A |
| 11332 | Patient236A  | Patient261E |
| 11333 | Patient026D  | Patient099C |
| 11333 | Patient026D  | Patient196A |
| 11333 | Patient026D  | Patient196C |
| 11333 | Patient026D  | Patient222F |
| 11333 | Patient026E  | Patient126E |
| 11333 | Patient026E  | Patient187  |
| 11333 | Patient032C  | Patient108D |
| 11333 | Patient032E  | Patient127B |
| 11333 | Patient032E  | Patient246A |
| 11333 | Patient034C  | Patient126E |
| 11333 | Patient034E  | Patient126E |
| 11333 | Patient053A1 | Patient099A |
| 11333 | Patient053A1 | Patient222D |
| 11333 | Patient053A1 | Patient222E |
| 11333 | Patient053C  | Patient232A |
| 11333 | Patient081C  | Patient149B |
| 11333 | Patient081C  | Patient196D |
| 11333 | Patient081C  | Patient232C |
| 11333 | Patient081D  | Patient099D |
| 11333 | Patient081D  | Patient127A |
| 11333 | Patient092H  | Patient131  |
| 11333 | Patient093A  | Patient181A |
| 11333 | Patient093A  | Patient192B |
| 11333 | Patient093D  | Patient192C |
| 11333 | Patient093E  | Patient181B |
| 11333 | Patient094A  | Patient103A |
| 11333 | Patient094B  | Patient181B |
| 11333 | Patient094E  | Patient230B |
| 11333 | Patient104B  | Patient230D |
| 11333 | Patient108A  | Patient261C |
| 11333 | Patient109D  | Patient261E |
| 11333 | Patient131   | Patient192C |
| 11333 | Patient141F  | Patient232E |
| 11333 | Patient145B  | Patient201E |
| 11333 | Patient150C  | Patient213B |
| 11333 | Patient177   | Patient210  |
| 11333 | Patient183D  | Patient220A |
| 11333 | Patient196F  | Patient235B |
| 11333 | Patient206   | Patient236B |
| 11333 | Patient222B  | Patient230D |
| 11333 | Patient230C  | Patient246E |
| 11333 | Patient230G  | Patient232E |
| 11334 | Patient022B  | Patient094A |

|       |              |             |
|-------|--------------|-------------|
| 11334 | Patient023   | Patient145A |
| 11334 | Patient026D  | Patient099A |
| 11334 | Patient032C  | Patient201B |
| 11334 | Patient032E  | Patient196D |
| 11334 | Patient032E  | Patient201E |
| 11334 | Patient045A  | Patient104B |
| 11334 | Patient045A  | Patient252D |
| 11334 | Patient053A1 | Patient252F |
| 11334 | Patient053A2 | Patient232C |
| 11334 | Patient053B  | Patient232A |
| 11334 | Patient053B  | Patient232C |
| 11334 | Patient053C  | Patient232E |
| 11334 | Patient079B  | Patient261E |
| 11334 | Patient079C  | Patient261C |
| 11334 | Patient081C  | Patient201E |
| 11334 | Patient081C  | Patient232A |
| 11334 | Patient081C  | Patient232E |
| 11334 | Patient092H  | Patient093B |
| 11334 | Patient093D  | Patient181A |
| 11334 | Patient093D  | Patient192A |
| 11334 | Patient093D  | Patient224B |
| 11334 | Patient093E  | Patient192C |
| 11334 | Patient094B  | Patient192C |
| 11334 | Patient099B  | Patient261E |
| 11334 | Patient104B  | Patient150C |
| 11334 | Patient108G  | Patient183A |
| 11334 | Patient109C  | Patient183A |
| 11334 | Patient126E  | Patient230A |
| 11334 | Patient131   | Patient192A |
| 11334 | Patient141F  | Patient247A |
| 11334 | Patient145B  | Patient184  |
| 11334 | Patient145B  | Patient232B |
| 11334 | Patient150C  | Patient252D |
| 11334 | Patient183A  | Patient222B |
| 11334 | Patient230C  | Patient246D |
| 11334 | Patient246B  | Patient261G |
| 11334 | Patient252F  | Patient261C |
| 11335 | Patient023   | Patient123D |
| 11335 | Patient026D  | Patient196B |
| 11335 | Patient026D  | Patient196E |
| 11335 | Patient026D  | Patient222A |
| 11335 | Patient026D  | Patient222E |
| 11335 | Patient026D  | Patient265  |
| 11335 | Patient032C  | Patient127A |
| 11335 | Patient032C  | Patient232B |
| 11335 | Patient032C  | Patient247E |
| 11335 | Patient032E  | Patient184  |
| 11335 | Patient045B  | Patient213B |
| 11335 | Patient045C  | Patient213B |
| 11335 | Patient053A1 | Patient099C |

|       |              |             |
|-------|--------------|-------------|
| 11335 | Patient053A1 | Patient108D |
| 11335 | Patient053A2 | Patient232A |
| 11335 | Patient053A2 | Patient232E |
| 11335 | Patient053B  | Patient232E |
| 11335 | Patient081A2 | Patient232B |
| 11335 | Patient081D  | Patient127B |
| 11335 | Patient093B  | Patient192E |
| 11335 | Patient093D  | Patient192B |
| 11335 | Patient093D  | Patient235F |
| 11335 | Patient093E  | Patient181A |
| 11335 | Patient093E  | Patient192A |
| 11335 | Patient093E  | Patient224B |
| 11335 | Patient094A  | Patient213A |
| 11335 | Patient094B  | Patient181A |
| 11335 | Patient094B  | Patient192A |
| 11335 | Patient094B  | Patient224B |
| 11335 | Patient094C  | Patient230B |
| 11335 | Patient094E  | Patient192C |
| 11335 | Patient094E  | Patient230F |
| 11335 | Patient097A  | Patient183D |
| 11335 | Patient097B  | Patient261C |
| 11335 | Patient097C  | Patient261C |
| 11335 | Patient097E  | Patient183D |
| 11335 | Patient099A  | Patient261E |
| 11335 | Patient099C  | Patient261E |
| 11335 | Patient099E  | Patient183D |
| 11335 | Patient104A  | Patient183C |
| 11335 | Patient104B  | Patient183B |
| 11335 | Patient104B  | Patient183E |
| 11335 | Patient109A  | Patient261E |
| 11335 | Patient131   | Patient192B |
| 11335 | Patient141D  | Patient232B |
| 11335 | Patient145B  | Patient149B |
| 11335 | Patient183A  | Patient187  |
| 11335 | Patient183B  | Patient252D |
| 11335 | Patient230G  | Patient246B |
| 11335 | Patient236B  | Patient261C |
| 11336 | Patient032C  | Patient127B |
| 11336 | Patient032C  | Patient246A |
| 11336 | Patient032D  | Patient246B |
| 11336 | Patient032E  | Patient149B |
| 11336 | Patient034D  | Patient126E |
| 11336 | Patient053A1 | Patient247E |
| 11336 | Patient081C  | Patient246B |
| 11336 | Patient081C  | Patient263B |
| 11336 | Patient086A  | Patient100A |
| 11336 | Patient086B  | Patient100A |
| 11336 | Patient092H  | Patient094A |
| 11336 | Patient093E  | Patient192B |
| 11336 | Patient094A  | Patient192E |

|       |              |             |
|-------|--------------|-------------|
| 11336 | Patient094B  | Patient192B |
| 11336 | Patient094C  | Patient230F |
| 11336 | Patient094E  | Patient192A |
| 11336 | Patient097B  | Patient183A |
| 11336 | Patient097C  | Patient183A |
| 11336 | Patient104A  | Patient220B |
| 11336 | Patient108F  | Patient261E |
| 11336 | Patient108H  | Patient183A |
| 11336 | Patient109E  | Patient183A |
| 11336 | Patient141F  | Patient247B |
| 11336 | Patient141F  | Patient247C |
| 11336 | Patient145B  | Patient201A |
| 11336 | Patient145B  | Patient246A |
| 11336 | Patient183E  | Patient252D |
| 11336 | Patient196A  | Patient261E |
| 11336 | Patient196C  | Patient261E |
| 11336 | Patient222F  | Patient261E |
| 11336 | Patient230G  | Patient247A |
| 11336 | Patient235B  | Patient263A |
| 11337 | Patient026D  | Patient099D |
| 11337 | Patient026D  | Patient222D |
| 11337 | Patient026E  | Patient099B |
| 11337 | Patient026E  | Patient236A |
| 11337 | Patient028   | Patient120D |
| 11337 | Patient032E  | Patient201A |
| 11337 | Patient045C  | Patient252D |
| 11337 | Patient053A1 | Patient127A |
| 11337 | Patient053A1 | Patient196D |
| 11337 | Patient053A1 | Patient201E |
| 11337 | Patient053C  | Patient263A |
| 11337 | Patient079A1 | Patient261C |
| 11337 | Patient081C  | Patient201A |
| 11337 | Patient081C  | Patient247A |
| 11337 | Patient081D  | Patient184  |
| 11337 | Patient081E  | Patient232C |
| 11337 | Patient086E  | Patient100A |
| 11337 | Patient092B  | Patient093C |
| 11337 | Patient092G  | Patient131  |
| 11337 | Patient093A  | Patient126A |
| 11337 | Patient093A  | Patient235F |
| 11337 | Patient094B  | Patient235F |
| 11337 | Patient094E  | Patient192B |
| 11337 | Patient103A  | Patient210  |
| 11337 | Patient104A  | Patient150C |
| 11337 | Patient104A  | Patient230D |
| 11337 | Patient108A  | Patient183D |
| 11337 | Patient109B  | Patient261E |
| 11337 | Patient109C  | Patient261C |
| 11337 | Patient126E  | Patient141A |
| 11337 | Patient126E  | Patient141C |

|       |              |              |
|-------|--------------|--------------|
| 11337 | Patient126E  | Patient206   |
| 11337 | Patient141F  | Patient232D  |
| 11337 | Patient145B  | Patient196D  |
| 11337 | Patient145B  | Patient246C  |
| 11337 | Patient183D  | Patient218A  |
| 11337 | Patient218B  | Patient261C  |
| 11337 | Patient220A  | Patient230D  |
| 11337 | Patient222A  | Patient261E  |
| 11337 | Patient247A  | Patient261G  |
| 11337 | Patient261E  | Patient265   |
| 11338 | Patient023   | Patient092G  |
| 11338 | Patient026D  | Patient247E  |
| 11338 | Patient026E  | Patient099C  |
| 11338 | Patient026E  | Patient196A  |
| 11338 | Patient026E  | Patient196C  |
| 11338 | Patient026E  | Patient222F  |
| 11338 | Patient028   | Patient120B  |
| 11338 | Patient032A  | Patient108B1 |
| 11338 | Patient032A  | Patient108B2 |
| 11338 | Patient032C  | Patient196D  |
| 11338 | Patient032C  | Patient201E  |
| 11338 | Patient032E  | Patient232A  |
| 11338 | Patient032E  | Patient232C  |
| 11338 | Patient032E  | Patient246C  |
| 11338 | Patient032E  | Patient263B  |
| 11338 | Patient045A  | Patient104A  |
| 11338 | Patient045B  | Patient252D  |
| 11338 | Patient045C  | Patient104B  |
| 11338 | Patient053A1 | Patient127B  |
| 11338 | Patient053B  | Patient263A  |
| 11338 | Patient079A2 | Patient261C  |
| 11338 | Patient079C  | Patient183D  |
| 11338 | Patient081D  | Patient201E  |
| 11338 | Patient081D  | Patient246A  |
| 11338 | Patient081D  | Patient246C  |
| 11338 | Patient081E  | Patient232A  |
| 11338 | Patient081E  | Patient232E  |
| 11338 | Patient093D  | Patient126A  |
| 11338 | Patient094C  | Patient181B  |
| 11338 | Patient099E  | Patient230D  |
| 11338 | Patient104B  | Patient150A  |
| 11338 | Patient108B1 | Patient183A  |
| 11338 | Patient108B2 | Patient183A  |
| 11338 | Patient126D  | Patient206   |
| 11338 | Patient145B  | Patient263B  |
| 11338 | Patient150A  | Patient213B  |
| 11338 | Patient150A  | Patient252D  |
| 11338 | Patient161B  | Patient213B  |
| 11338 | Patient183A  | Patient252A  |
| 11338 | Patient187   | Patient261C  |

|       |              |             |
|-------|--------------|-------------|
| 11338 | Patient196B  | Patient261E |
| 11338 | Patient196E  | Patient261E |
| 11338 | Patient213A  | Patient247D |
| 11338 | Patient218A  | Patient230D |
| 11338 | Patient222E  | Patient261E |
| 11338 | Patient230G  | Patient232D |
| 11338 | Patient230G  | Patient247B |
| 11338 | Patient230G  | Patient247C |
| 11338 | Patient232D  | Patient261G |
| 11339 | Patient026D  | Patient201B |
| 11339 | Patient026E  | Patient099A |
| 11339 | Patient026E  | Patient222A |
| 11339 | Patient026E  | Patient222E |
| 11339 | Patient032B  | Patient232A |
| 11339 | Patient032B  | Patient232C |
| 11339 | Patient032C  | Patient184  |
| 11339 | Patient032D  | Patient247A |
| 11339 | Patient032E  | Patient232E |
| 11339 | Patient045B  | Patient104B |
| 11339 | Patient053A2 | Patient263A |
| 11339 | Patient053C  | Patient232D |
| 11339 | Patient081C  | Patient232D |
| 11339 | Patient081C  | Patient247B |
| 11339 | Patient081C  | Patient247C |
| 11339 | Patient081D  | Patient149B |
| 11339 | Patient081D  | Patient196D |
| 11339 | Patient081D  | Patient232C |
| 11339 | Patient093D  | Patient235E |
| 11339 | Patient094B  | Patient126A |
| 11339 | Patient094C  | Patient192A |
| 11339 | Patient094C  | Patient192C |
| 11339 | Patient094C  | Patient224B |
| 11339 | Patient099D  | Patient261E |
| 11339 | Patient104A  | Patient183B |
| 11339 | Patient104A  | Patient183E |
| 11339 | Patient108G  | Patient261C |
| 11339 | Patient109D  | Patient183A |
| 11339 | Patient126D  | Patient183D |
| 11339 | Patient126E  | Patient141B |
| 11339 | Patient141F  | Patient246E |
| 11339 | Patient146   | Patient242  |
| 11339 | Patient183C  | Patient218A |
| 11339 | Patient183C  | Patient220A |
| 11339 | Patient183D  | Patient218B |
| 11339 | Patient230D  | Patient236B |
| 11339 | Patient247B  | Patient261G |
| 11339 | Patient247C  | Patient261G |
| 11340 | Patient022B  | Patient094B |
| 11340 | Patient026E  | Patient196B |
| 11340 | Patient026E  | Patient196E |

|       |              |              |
|-------|--------------|--------------|
| 11340 | Patient026E  | Patient265   |
| 11340 | Patient032B  | Patient232E  |
| 11340 | Patient032C  | Patient149B  |
| 11340 | Patient045A  | Patient220A  |
| 11340 | Patient053A1 | Patient099D  |
| 11340 | Patient053A1 | Patient246A  |
| 11340 | Patient053A1 | Patient246C  |
| 11340 | Patient053A2 | Patient232D  |
| 11340 | Patient053B  | Patient232D  |
| 11340 | Patient079A1 | Patient183D  |
| 11340 | Patient079A2 | Patient183D  |
| 11340 | Patient081D  | Patient232A  |
| 11340 | Patient081D  | Patient232E  |
| 11340 | Patient092H  | Patient093A  |
| 11340 | Patient093E  | Patient126A  |
| 11340 | Patient093E  | Patient235F  |
| 11340 | Patient094C  | Patient181A  |
| 11340 | Patient094C  | Patient235F  |
| 11340 | Patient094D  | Patient192E  |
| 11340 | Patient097A  | Patient183C  |
| 11340 | Patient097D  | Patient183D  |
| 11340 | Patient097E  | Patient183C  |
| 11340 | Patient099E  | Patient183C  |
| 11340 | Patient108B1 | Patient145C  |
| 11340 | Patient108B1 | Patient261B  |
| 11340 | Patient108B1 | Patient261C  |
| 11340 | Patient108B2 | Patient145C  |
| 11340 | Patient108B2 | Patient261B  |
| 11340 | Patient108B2 | Patient261C  |
| 11340 | Patient108H  | Patient261C  |
| 11340 | Patient109E  | Patient261C  |
| 11340 | Patient123A  | Patient126E  |
| 11340 | Patient126E  | Patient261B  |
| 11340 | Patient141F  | Patient246D  |
| 11340 | Patient146   | Patient258E  |
| 11340 | Patient150C  | Patient220A  |
| 11340 | Patient183A  | Patient252B  |
| 11341 | Patient021A2 | Patient242   |
| 11341 | Patient022B  | Patient093A  |
| 11341 | Patient022B  | Patient093D  |
| 11341 | Patient026D  | Patient127A  |
| 11341 | Patient026E  | Patient222D  |
| 11341 | Patient032A  | Patient232B  |
| 11341 | Patient032C  | Patient201A  |
| 11341 | Patient032D  | Patient247B  |
| 11341 | Patient032D  | Patient247C  |
| 11341 | Patient034A  | Patient108B1 |
| 11341 | Patient034A  | Patient108B2 |
| 11341 | Patient034B  | Patient126E  |
| 11341 | Patient053A1 | Patient149B  |



|       |              |              |
|-------|--------------|--------------|
| 11341 | Patient053A1 | Patient184   |
| 11341 | Patient053A1 | Patient201A  |
| 11341 | Patient053C  | Patient100A  |
| 11341 | Patient079B  | Patient183A  |
| 11341 | Patient081A1 | Patient232B  |
| 11341 | Patient081F  | Patient232C  |
| 11341 | Patient092D  | Patient146   |
| 11341 | Patient092H  | Patient094D  |
| 11341 | Patient093A  | Patient103A  |
| 11341 | Patient093A  | Patient192E  |
| 11341 | Patient093A  | Patient235E  |
| 11341 | Patient094A  | Patient195   |
| 11341 | Patient094A  | Patient224A  |
| 11341 | Patient094B  | Patient235E  |
| 11341 | Patient099B  | Patient183A  |
| 11341 | Patient108D  | Patient261E  |
| 11341 | Patient109A  | Patient183A  |
| 11341 | Patient126E  | Patient150C  |
| 11341 | Patient131   | Patient192E  |
| 11341 | Patient145B  | Patient232A  |
| 11341 | Patient145B  | Patient232C  |
| 11341 | Patient145B  | Patient246B  |
| 11341 | Patient183A  | Patient236A  |
| 11341 | Patient222D  | Patient261E  |
| 11341 | Patient230G  | Patient246D  |
| 11341 | Patient230G  | Patient246E  |
| 11341 | Patient246E  | Patient261G  |
| 11342 | Patient022B  | Patient093E  |
| 11342 | Patient023   | Patient235F  |
| 11342 | Patient026D  | Patient201E  |
| 11342 | Patient026D  | Patient232B  |
| 11342 | Patient026E  | Patient099D  |
| 11342 | Patient032C  | Patient232C  |
| 11342 | Patient032C  | Patient246C  |
| 11342 | Patient032C  | Patient263B  |
| 11342 | Patient032D  | Patient246D  |
| 11342 | Patient032E  | Patient246B  |
| 11342 | Patient034C  | Patient108B1 |
| 11342 | Patient034C  | Patient108B2 |
| 11342 | Patient034E  | Patient108B1 |
| 11342 | Patient034E  | Patient108B2 |
| 11342 | Patient045C  | Patient104A  |
| 11342 | Patient079C  | Patient183C  |
| 11342 | Patient081B  | Patient232C  |
| 11342 | Patient081B  | Patient232E  |
| 11342 | Patient081D  | Patient201A  |
| 11342 | Patient081D  | Patient246B  |
| 11342 | Patient081D  | Patient263B  |
| 11342 | Patient081F  | Patient232A  |
| 11342 | Patient081F  | Patient232E  |

|       |              |             |
|-------|--------------|-------------|
| 11342 | Patient092E  | Patient131  |
| 11342 | Patient092H  | Patient093D |
| 11342 | Patient093C  | Patient235F |
| 11342 | Patient094C  | Patient192B |
| 11342 | Patient099E  | Patient206  |
| 11342 | Patient104A  | Patient150A |
| 11342 | Patient104B  | Patient161B |
| 11342 | Patient108G  | Patient183D |
| 11342 | Patient109B  | Patient183A |
| 11342 | Patient126E  | Patient230D |
| 11342 | Patient127A  | Patient261E |
| 11342 | Patient141D  | Patient232A |
| 11342 | Patient141D  | Patient232C |
| 11342 | Patient145B  | Patient232E |
| 11342 | Patient145B  | Patient247A |
| 11342 | Patient183D  | Patient222B |
| 11342 | Patient183D  | Patient236B |
| 11342 | Patient201B  | Patient261E |
| 11342 | Patient246D  | Patient261G |
| 11343 | Patient021A2 | Patient206  |
| 11343 | Patient026D  | Patient127B |
| 11343 | Patient026D  | Patient184  |
| 11343 | Patient026E  | Patient247E |
| 11343 | Patient032C  | Patient232A |
| 11343 | Patient032C  | Patient232E |
| 11343 | Patient032D  | Patient246E |
| 11343 | Patient032E  | Patient247A |
| 11343 | Patient045B  | Patient104A |
| 11343 | Patient053B  | Patient100A |
| 11343 | Patient081B  | Patient232A |
| 11343 | Patient081C  | Patient246D |
| 11343 | Patient081C  | Patient246E |
| 11343 | Patient081D  | Patient247A |
| 11343 | Patient093D  | Patient103A |
| 11343 | Patient099A  | Patient183A |
| 11343 | Patient108A  | Patient183C |
| 11343 | Patient108F  | Patient183A |
| 11343 | Patient109D  | Patient261C |
| 11343 | Patient123C  | Patient126E |
| 11343 | Patient126E  | Patient183A |
| 11343 | Patient126E  | Patient261C |
| 11343 | Patient131   | Patient258E |
| 11343 | Patient141D  | Patient232E |
| 11343 | Patient183A  | Patient196A |
| 11343 | Patient183B  | Patient220A |
| 11343 | Patient183E  | Patient220A |
| 11343 | Patient196D  | Patient206  |
| 11343 | Patient206   | Patient222F |
| 11343 | Patient206   | Patient236A |
| 11343 | Patient218B  | Patient230D |

|       |              |              |
|-------|--------------|--------------|
| 11343 | Patient232B  | Patient261E  |
| 11344 | Patient026D  | Patient189E  |
| 11344 | Patient026D  | Patient196D  |
| 11344 | Patient026E  | Patient201B  |
| 11344 | Patient028   | Patient120C  |
| 11344 | Patient032E  | Patient232D  |
| 11344 | Patient045A  | Patient099E  |
| 11344 | Patient045D  | Patient092D  |
| 11344 | Patient053A2 | Patient100A  |
| 11344 | Patient081A2 | Patient232C  |
| 11344 | Patient092A  | Patient131   |
| 11344 | Patient092H  | Patient093E  |
| 11344 | Patient092H  | Patient094B  |
| 11344 | Patient093E  | Patient103A  |
| 11344 | Patient093E  | Patient235E  |
| 11344 | Patient094B  | Patient103A  |
| 11344 | Patient094B  | Patient192E  |
| 11344 | Patient094C  | Patient235E  |
| 11344 | Patient097A  | Patient183B  |
| 11344 | Patient097A  | Patient183E  |
| 11344 | Patient097B  | Patient183D  |
| 11344 | Patient097E  | Patient183B  |
| 11344 | Patient097E  | Patient183E  |
| 11344 | Patient099C  | Patient183A  |
| 11344 | Patient126D  | Patient150C  |
| 11344 | Patient126D  | Patient183C  |
| 11344 | Patient126E  | Patient230E  |
| 11344 | Patient127B  | Patient261E  |
| 11344 | Patient133   | Patient146   |
| 11344 | Patient145B  | Patient247B  |
| 11344 | Patient145B  | Patient247C  |
| 11344 | Patient183A  | Patient196C  |
| 11344 | Patient183A  | Patient222F  |
| 11344 | Patient183C  | Patient218B  |
| 11344 | Patient206   | Patient222A  |
| 11344 | Patient232B  | Patient261A  |
| 11344 | Patient236A  | Patient261C  |
| 11344 | Patient247E  | Patient261E  |
| 11345 | Patient021A1 | Patient242   |
| 11345 | Patient026D  | Patient189A  |
| 11345 | Patient028   | Patient120A  |
| 11345 | Patient032E  | Patient247B  |
| 11345 | Patient032E  | Patient247C  |
| 11345 | Patient034A  | Patient232B  |
| 11345 | Patient034C  | Patient232B  |
| 11345 | Patient034D  | Patient108B1 |
| 11345 | Patient034D  | Patient108B2 |
| 11345 | Patient053A1 | Patient246B  |
| 11345 | Patient053A1 | Patient263B  |
| 11345 | Patient081A2 | Patient232A  |

|       |              |             |
|-------|--------------|-------------|
| 11345 | Patient081A2 | Patient232E |
| 11345 | Patient081D  | Patient232D |
| 11345 | Patient081D  | Patient247B |
| 11345 | Patient081D  | Patient247C |
| 11345 | Patient081E  | Patient232D |
| 11345 | Patient092E  | Patient093B |
| 11345 | Patient093A  | Patient195  |
| 11345 | Patient093A  | Patient213A |
| 11345 | Patient093D  | Patient192E |
| 11345 | Patient093E  | Patient192E |
| 11345 | Patient094E  | Patient192E |
| 11345 | Patient097C  | Patient183D |
| 11345 | Patient097D  | Patient183C |
| 11345 | Patient099B  | Patient261C |
| 11345 | Patient099E  | Patient183B |
| 11345 | Patient099E  | Patient183E |
| 11345 | Patient108B1 | Patient261D |
| 11345 | Patient108B2 | Patient261D |
| 11345 | Patient108H  | Patient183D |
| 11345 | Patient109A  | Patient261C |
| 11345 | Patient109C  | Patient183D |
| 11345 | Patient109E  | Patient183D |
| 11345 | Patient121A  | Patient126D |
| 11345 | Patient123B  | Patient126E |
| 11345 | Patient126E  | Patient261D |
| 11345 | Patient146   | Patient192D |
| 11345 | Patient150A  | Patient220A |
| 11345 | Patient183A  | Patient222E |
| 11345 | Patient183A  | Patient265  |
| 11345 | Patient183B  | Patient218A |
| 11345 | Patient183C  | Patient236B |
| 11345 | Patient183D  | Patient187  |
| 11345 | Patient183D  | Patient252A |
| 11345 | Patient183E  | Patient218A |
| 11345 | Patient184   | Patient261E |
| 11345 | Patient206   | Patient222E |
| 11346 | Patient021A1 | Patient206  |
| 11346 | Patient023   | Patient235E |
| 11346 | Patient026D  | Patient149B |
| 11346 | Patient026D  | Patient189B |
| 11346 | Patient026E  | Patient127A |
| 11346 | Patient032C  | Patient246B |
| 11346 | Patient034E  | Patient232B |
| 11346 | Patient045B  | Patient220A |
| 11346 | Patient045C  | Patient220A |
| 11346 | Patient079A1 | Patient183C |
| 11346 | Patient079A2 | Patient183C |
| 11346 | Patient079B  | Patient261C |
| 11346 | Patient079C  | Patient183B |
| 11346 | Patient092A  | Patient093B |

|       |              |              |
|-------|--------------|--------------|
| 11346 | Patient093B  | Patient192F  |
| 11346 | Patient093C  | Patient173A  |
| 11346 | Patient093C  | Patient235E  |
| 11346 | Patient094C  | Patient126A  |
| 11346 | Patient099A  | Patient261C  |
| 11346 | Patient099C  | Patient261C  |
| 11346 | Patient104A  | Patient161B  |
| 11346 | Patient108B1 | Patient183D  |
| 11346 | Patient108B2 | Patient183D  |
| 11346 | Patient108D  | Patient183A  |
| 11346 | Patient108F  | Patient261C  |
| 11346 | Patient126E  | Patient150A  |
| 11346 | Patient146   | Patient241   |
| 11346 | Patient150C  | Patient236B  |
| 11346 | Patient183A  | Patient196E  |
| 11346 | Patient183C  | Patient222B  |
| 11346 | Patient187   | Patient230D  |
| 11346 | Patient201E  | Patient261E  |
| 11346 | Patient206   | Patient265   |
| 11347 | Patient026D  | Patient201A  |
| 11347 | Patient026D  | Patient246A  |
| 11347 | Patient026D  | Patient246C  |
| 11347 | Patient026E  | Patient201E  |
| 11347 | Patient026E  | Patient232B  |
| 11347 | Patient026F  | Patient126E  |
| 11347 | Patient032B  | Patient232D  |
| 11347 | Patient032C  | Patient247A  |
| 11347 | Patient045A  | Patient218A  |
| 11347 | Patient045D  | Patient230D  |
| 11347 | Patient045D  | Patient258A1 |
| 11347 | Patient079C  | Patient183E  |
| 11347 | Patient081F  | Patient232D  |
| 11347 | Patient092E  | Patient094A  |
| 11347 | Patient092H  | Patient094C  |
| 11347 | Patient092H  | Patient094E  |
| 11347 | Patient093D  | Patient195   |
| 11347 | Patient093D  | Patient213A  |
| 11347 | Patient094A  | Patient103B  |
| 11347 | Patient094B  | Patient195   |
| 11347 | Patient108A  | Patient183B  |
| 11347 | Patient108A  | Patient183E  |
| 11347 | Patient109B  | Patient261C  |
| 11347 | Patient109C  | Patient183C  |
| 11347 | Patient109D  | Patient183D  |
| 11347 | Patient141D  | Patient232D  |
| 11347 | Patient145B  | Patient232D  |
| 11347 | Patient145B  | Patient246D  |
| 11347 | Patient145B  | Patient246E  |
| 11347 | Patient183A  | Patient196B  |
| 11347 | Patient183A  | Patient252F  |

|       |              |             |
|-------|--------------|-------------|
| 11347 | Patient189A  | Patient206  |
| 11347 | Patient189E  | Patient206  |
| 11347 | Patient196D  | Patient261E |
| 11348 | Patient026E  | Patient127B |
| 11348 | Patient026E  | Patient184  |
| 11348 | Patient032A  | Patient232A |
| 11348 | Patient032A  | Patient232C |
| 11348 | Patient032C  | Patient232D |
| 11348 | Patient032E  | Patient246D |
| 11348 | Patient032E  | Patient246E |
| 11348 | Patient034D  | Patient232B |
| 11348 | Patient045B  | Patient099E |
| 11348 | Patient045C  | Patient099E |
| 11348 | Patient045D  | Patient258B |
| 11348 | Patient045D  | Patient258D |
| 11348 | Patient053A1 | Patient247A |
| 11348 | Patient081B  | Patient232D |
| 11348 | Patient092A  | Patient094A |
| 11348 | Patient093E  | Patient213A |
| 11348 | Patient094A  | Patient192F |
| 11348 | Patient094B  | Patient213A |
| 11348 | Patient099B  | Patient183D |
| 11348 | Patient099D  | Patient183A |
| 11348 | Patient099E  | Patient150C |
| 11348 | Patient104B  | Patient150B |
| 11348 | Patient108G  | Patient183C |
| 11348 | Patient126D  | Patient183B |
| 11348 | Patient126D  | Patient183E |
| 11348 | Patient126E  | Patient230B |
| 11348 | Patient145C  | Patient232B |
| 11348 | Patient149B  | Patient261E |
| 11348 | Patient150B  | Patient213B |
| 11348 | Patient150B  | Patient252D |
| 11348 | Patient161B  | Patient252D |
| 11348 | Patient183A  | Patient222A |
| 11348 | Patient183A  | Patient222D |
| 11348 | Patient183D  | Patient252B |
| 11348 | Patient183E  | Patient218B |
| 11348 | Patient189B  | Patient206  |
| 11348 | Patient196A  | Patient261C |
| 11348 | Patient196C  | Patient261C |
| 11348 | Patient201B  | Patient206  |
| 11348 | Patient222F  | Patient261C |
| 11349 | Patient026D  | Patient263B |
| 11349 | Patient026E  | Patient189E |
| 11349 | Patient026E  | Patient196D |
| 11349 | Patient032A  | Patient232E |
| 11349 | Patient032B  | Patient045D |
| 11349 | Patient032C  | Patient247B |
| 11349 | Patient032C  | Patient247C |

|       |              |              |
|-------|--------------|--------------|
| 11349 | Patient045A  | Patient126E  |
| 11349 | Patient045A  | Patient236B  |
| 11349 | Patient045D  | Patient258F  |
| 11349 | Patient045D  | Patient258G  |
| 11349 | Patient053A1 | Patient247C  |
| 11349 | Patient066D  | Patient126E  |
| 11349 | Patient066F  | Patient126E  |
| 11349 | Patient079B  | Patient183D  |
| 11349 | Patient081A1 | Patient232C  |
| 11349 | Patient081D  | Patient246D  |
| 11349 | Patient081D  | Patient246E  |
| 11349 | Patient092B  | Patient131   |
| 11349 | Patient093A  | Patient224A  |
| 11349 | Patient093D  | Patient224A  |
| 11349 | Patient093E  | Patient195   |
| 11349 | Patient094C  | Patient103A  |
| 11349 | Patient097D  | Patient183B  |
| 11349 | Patient097D  | Patient183E  |
| 11349 | Patient109A  | Patient183D  |
| 11349 | Patient109E  | Patient183C  |
| 11349 | Patient126D  | Patient150A  |
| 11349 | Patient126E  | Patient161B  |
| 11349 | Patient126E  | Patient230F  |
| 11349 | Patient150C  | Patient189E  |
| 11349 | Patient183B  | Patient218B  |
| 11349 | Patient183B  | Patient236B  |
| 11349 | Patient183C  | Patient187   |
| 11349 | Patient183E  | Patient236B  |
| 11349 | Patient196A  | Patient206   |
| 11349 | Patient196C  | Patient206   |
| 11349 | Patient201A  | Patient261E  |
| 11349 | Patient206   | Patient222D  |
| 11349 | Patient222A  | Patient261C  |
| 11349 | Patient230A  | Patient232B  |
| 11349 | Patient230D  | Patient236A  |
| 11349 | Patient232A  | Patient261A  |
| 11349 | Patient232C  | Patient261A  |
| 11349 | Patient246A  | Patient261E  |
| 11349 | Patient261C  | Patient265   |
| 11350 | Patient021A2 | Patient230D  |
| 11350 | Patient026D  | Patient232A  |
| 11350 | Patient026D  | Patient232C  |
| 11350 | Patient026E  | Patient189A  |
| 11350 | Patient034B  | Patient108B1 |
| 11350 | Patient034B  | Patient108B2 |
| 11350 | Patient045D  | Patient258A2 |
| 11350 | Patient053A1 | Patient246D  |
| 11350 | Patient053A1 | Patient247B  |
| 11350 | Patient066E  | Patient126E  |
| 11350 | Patient079A1 | Patient183B  |

|       |              |             |
|-------|--------------|-------------|
| 11350 | Patient079A1 | Patient183E |
| 11350 | Patient079A2 | Patient183B |
| 11350 | Patient079A2 | Patient183E |
| 11350 | Patient081A1 | Patient232A |
| 11350 | Patient081A1 | Patient232E |
| 11350 | Patient081A2 | Patient232D |
| 11350 | Patient093E  | Patient224A |
| 11350 | Patient094A  | Patient103C |
| 11350 | Patient094B  | Patient224A |
| 11350 | Patient094C  | Patient192E |
| 11350 | Patient097B  | Patient183C |
| 11350 | Patient097C  | Patient183C |
| 11350 | Patient099A  | Patient183D |
| 11350 | Patient099C  | Patient183D |
| 11350 | Patient099D  | Patient261C |
| 11350 | Patient108B1 | Patient123A |
| 11350 | Patient108B2 | Patient123A |
| 11350 | Patient108H  | Patient183C |
| 11350 | Patient121B  | Patient126D |
| 11350 | Patient127A  | Patient183A |
| 11350 | Patient131   | Patient217A |
| 11350 | Patient141C  | Patient232B |
| 11350 | Patient146   | Patient164  |
| 11350 | Patient150C  | Patient189A |
| 11350 | Patient150C  | Patient218A |
| 11350 | Patient183D  | Patient236A |
| 11350 | Patient187   | Patient206  |
| 11350 | Patient196B  | Patient261C |
| 11350 | Patient196E  | Patient261C |
| 11350 | Patient222E  | Patient261C |
| 11350 | Patient232E  | Patient261A |
| 11350 | Patient246C  | Patient261E |
| 11350 | Patient261E  | Patient263B |
| 11351 | Patient021A2 | Patient045A |
| 11351 | Patient022B  | Patient094C |
| 11351 | Patient026B  | Patient126E |
| 11351 | Patient026D  | Patient232E |
| 11351 | Patient026E  | Patient149B |
| 11351 | Patient026E  | Patient189B |
| 11351 | Patient028   | Patient074C |
| 11351 | Patient034A  | Patient232A |
| 11351 | Patient034A  | Patient232C |
| 11351 | Patient045D  | Patient141D |
| 11351 | Patient092B  | Patient093B |
| 11351 | Patient092E  | Patient093A |
| 11351 | Patient108B2 | Patient183C |
| 11351 | Patient108D  | Patient261C |
| 11351 | Patient108F  | Patient183D |
| 11351 | Patient109B  | Patient183D |
| 11351 | Patient109C  | Patient183B |



|       |              |             |
|-------|--------------|-------------|
| 11351 | Patient126D  | Patient217A |
| 11351 | Patient126E  | Patient145A |
| 11351 | Patient126E  | Patient183D |
| 11351 | Patient150A  | Patient236B |
| 11351 | Patient150C  | Patient189B |
| 11351 | Patient161B  | Patient220A |
| 11351 | Patient183B  | Patient222B |
| 11351 | Patient183D  | Patient196A |
| 11351 | Patient196B  | Patient206  |
| 11351 | Patient196E  | Patient206  |
| 11351 | Patient232A  | Patient261E |
| 11351 | Patient232C  | Patient261E |
| 11351 | Patient232E  | Patient261E |
| 11352 | Patient021A1 | Patient230D |
| 11352 | Patient023   | Patient206  |
| 11352 | Patient026A  | Patient126E |
| 11352 | Patient026D  | Patient246B |
| 11352 | Patient026D  | Patient247A |
| 11352 | Patient026E  | Patient201A |
| 11352 | Patient026E  | Patient246A |
| 11352 | Patient026E  | Patient246C |
| 11352 | Patient028   | Patient074B |
| 11352 | Patient032C  | Patient246D |
| 11352 | Patient032C  | Patient246E |
| 11352 | Patient034A  | Patient232E |
| 11352 | Patient034C  | Patient232A |
| 11352 | Patient034C  | Patient232C |
| 11352 | Patient034E  | Patient232A |
| 11352 | Patient034E  | Patient232C |
| 11352 | Patient045A  | Patient045D |
| 11352 | Patient045A  | Patient218B |
| 11352 | Patient053A1 | Patient246E |
| 11352 | Patient090   | Patient146  |
| 11352 | Patient093A  | Patient192F |
| 11352 | Patient094C  | Patient195  |
| 11352 | Patient094C  | Patient213A |
| 11352 | Patient094D  | Patient192F |
| 11352 | Patient099E  | Patient150A |
| 11352 | Patient100A  | Patient217A |
| 11352 | Patient104A  | Patient150B |
| 11352 | Patient108B1 | Patient183C |
| 11352 | Patient108G  | Patient183B |
| 11352 | Patient108G  | Patient183E |
| 11352 | Patient109C  | Patient183E |
| 11352 | Patient123D  | Patient126E |
| 11352 | Patient127B  | Patient183A |
| 11352 | Patient131   | Patient217C |
| 11352 | Patient141A  | Patient232B |
| 11352 | Patient150C  | Patient232B |
| 11352 | Patient183A  | Patient196D |

|       |              |              |
|-------|--------------|--------------|
| 11352 | Patient183A  | Patient201B  |
| 11352 | Patient183A  | Patient247E  |
| 11352 | Patient183C  | Patient252A  |
| 11352 | Patient183D  | Patient196C  |
| 11352 | Patient183D  | Patient222F  |
| 11352 | Patient183E  | Patient222B  |
| 11352 | Patient222D  | Patient261C  |
| 11353 | Patient028   | Patient074A  |
| 11353 | Patient034C  | Patient232E  |
| 11353 | Patient034E  | Patient232E  |
| 11353 | Patient045B  | Patient218A  |
| 11353 | Patient045B  | Patient236B  |
| 11353 | Patient045C  | Patient218A  |
| 11353 | Patient045C  | Patient236B  |
| 11353 | Patient081C  | Patient146   |
| 11353 | Patient092A  | Patient094D  |
| 11353 | Patient092E  | Patient093D  |
| 11353 | Patient092E  | Patient094D  |
| 11353 | Patient099B  | Patient230D  |
| 11353 | Patient108B1 | Patient123C  |
| 11353 | Patient108B2 | Patient123C  |
| 11353 | Patient109D  | Patient183C  |
| 11353 | Patient109E  | Patient183B  |
| 11353 | Patient126D  | Patient217C  |
| 11353 | Patient131   | Patient217B  |
| 11353 | Patient131   | Patient217E  |
| 11353 | Patient131   | Patient217F  |
| 11353 | Patient131   | Patient217H  |
| 11353 | Patient131   | Patient217I  |
| 11353 | Patient141B  | Patient232B  |
| 11353 | Patient150C  | Patient187   |
| 11353 | Patient150C  | Patient222B  |
| 11353 | Patient183D  | Patient222A  |
| 11353 | Patient183D  | Patient222E  |
| 11353 | Patient183D  | Patient252F  |
| 11353 | Patient183D  | Patient265   |
| 11353 | Patient183E  | Patient187   |
| 11353 | Patient201B  | Patient261C  |
| 11353 | Patient201E  | Patient206   |
| 11353 | Patient206   | Patient218A  |
| 11353 | Patient232B  | Patient261B  |
| 11353 | Patient246B  | Patient261E  |
| 11353 | Patient247E  | Patient261C  |
| 11353 | Patient252A  | Patient258A1 |
| 11353 | Patient252A  | Patient258D  |
| 11354 | Patient021A1 | Patient045A  |
| 11354 | Patient026D  | Patient247B  |
| 11354 | Patient026D  | Patient247C  |
| 11354 | Patient026E  | Patient232A  |
| 11354 | Patient026E  | Patient232C  |

|       |              |             |
|-------|--------------|-------------|
| 11354 | Patient026E  | Patient263B |
| 11354 | Patient028   | Patient074D |
| 11354 | Patient032A  | Patient232D |
| 11354 | Patient045A  | Patient187  |
| 11354 | Patient045C  | Patient126E |
| 11354 | Patient092A  | Patient093D |
| 11354 | Patient092B  | Patient094A |
| 11354 | Patient093D  | Patient192F |
| 11354 | Patient094A  | Patient235C |
| 11354 | Patient097A  | Patient206  |
| 11354 | Patient097B  | Patient183B |
| 11354 | Patient097B  | Patient183E |
| 11354 | Patient097C  | Patient183B |
| 11354 | Patient097C  | Patient183E |
| 11354 | Patient097E  | Patient206  |
| 11354 | Patient099A  | Patient230D |
| 11354 | Patient099C  | Patient230D |
| 11354 | Patient100A  | Patient217C |
| 11354 | Patient108D  | Patient183D |
| 11354 | Patient108H  | Patient183B |
| 11354 | Patient108H  | Patient183E |
| 11354 | Patient109E  | Patient183E |
| 11354 | Patient126D  | Patient217B |
| 11354 | Patient126D  | Patient217F |
| 11354 | Patient126D  | Patient217H |
| 11354 | Patient127A  | Patient261C |
| 11354 | Patient131   | Patient192F |
| 11354 | Patient131   | Patient217D |
| 11354 | Patient145C  | Patient232A |
| 11354 | Patient145C  | Patient232C |
| 11354 | Patient150A  | Patient189E |
| 11354 | Patient150A  | Patient218A |
| 11354 | Patient150C  | Patient218B |
| 11354 | Patient183B  | Patient187  |
| 11354 | Patient183C  | Patient252B |
| 11354 | Patient222A  | Patient230D |
| 11354 | Patient222F  | Patient230D |
| 11354 | Patient230D  | Patient265  |
| 11355 | Patient026E  | Patient232E |
| 11355 | Patient032A  | Patient045D |
| 11355 | Patient034D  | Patient232A |
| 11355 | Patient034D  | Patient232C |
| 11355 | Patient045B  | Patient126E |
| 11355 | Patient079B  | Patient183C |
| 11355 | Patient081A1 | Patient232D |
| 11355 | Patient092A  | Patient093A |
| 11355 | Patient092E  | Patient093E |
| 11355 | Patient092E  | Patient094B |
| 11355 | Patient093A  | Patient103B |
| 11355 | Patient093E  | Patient192F |

|       |              |              |
|-------|--------------|--------------|
| 11355 | Patient094B  | Patient192F  |
| 11355 | Patient097E  | Patient258A1 |
| 11355 | Patient097E  | Patient258D  |
| 11355 | Patient099B  | Patient183C  |
| 11355 | Patient099B  | Patient206   |
| 11355 | Patient099D  | Patient183D  |
| 11355 | Patient100A  | Patient217B  |
| 11355 | Patient100A  | Patient217E  |
| 11355 | Patient100A  | Patient217F  |
| 11355 | Patient100A  | Patient217H  |
| 11355 | Patient108B1 | Patient123B  |
| 11355 | Patient108B2 | Patient123B  |
| 11355 | Patient108F  | Patient183C  |
| 11355 | Patient109A  | Patient183C  |
| 11355 | Patient123A  | Patient232B  |
| 11355 | Patient126D  | Patient217D  |
| 11355 | Patient126D  | Patient217E  |
| 11355 | Patient126D  | Patient217I  |
| 11355 | Patient145C  | Patient232E  |
| 11355 | Patient149B  | Patient183A  |
| 11355 | Patient150A  | Patient189A  |
| 11355 | Patient150B  | Patient220A  |
| 11355 | Patient161B  | Patient222B  |
| 11355 | Patient161B  | Patient236B  |
| 11355 | Patient183A  | Patient184   |
| 11355 | Patient183A  | Patient189E  |
| 11355 | Patient183A  | Patient201E  |
| 11355 | Patient183B  | Patient252A  |
| 11355 | Patient183C  | Patient236A  |
| 11355 | Patient183D  | Patient196B  |
| 11355 | Patient196C  | Patient230D  |
| 11355 | Patient213B  | Patient220B  |
| 11355 | Patient222E  | Patient230D  |
| 11355 | Patient232B  | Patient261C  |
| 11355 | Patient247A  | Patient261E  |
| 11355 | Patient252B  | Patient258A1 |
| 11355 | Patient252B  | Patient258D  |
| 11356 | Patient021A2 | Patient045C  |
| 11356 | Patient026D  | Patient232D  |
| 11356 | Patient034B  | Patient232B  |
| 11356 | Patient034D  | Patient232E  |
| 11356 | Patient045A  | Patient099B  |
| 11356 | Patient045B  | Patient045D  |
| 11356 | Patient045C  | Patient045D  |
| 11356 | Patient081D  | Patient146   |
| 11356 | Patient092A  | Patient093E  |
| 11356 | Patient092A  | Patient094B  |
| 11356 | Patient092D  | Patient100A  |
| 11356 | Patient093B  | Patient235F  |
| 11356 | Patient094E  | Patient192F  |

|       |              |              |
|-------|--------------|--------------|
| 11356 | Patient097A  | Patient258A1 |
| 11356 | Patient099A  | Patient183C  |
| 11356 | Patient099A  | Patient206   |
| 11356 | Patient099C  | Patient183C  |
| 11356 | Patient100A  | Patient217D  |
| 11356 | Patient100A  | Patient217I  |
| 11356 | Patient108B1 | Patient183B  |
| 11356 | Patient108B1 | Patient183E  |
| 11356 | Patient108B2 | Patient183B  |
| 11356 | Patient108B2 | Patient183E  |
| 11356 | Patient109B  | Patient183C  |
| 11356 | Patient126E  | Patient150B  |
| 11356 | Patient127B  | Patient261C  |
| 11356 | Patient128   | Patient146   |
| 11356 | Patient150A  | Patient189B  |
| 11356 | Patient150A  | Patient232B  |
| 11356 | Patient183A  | Patient246A  |
| 11356 | Patient183A  | Patient246C  |
| 11356 | Patient183A  | Patient263B  |
| 11356 | Patient183D  | Patient196E  |
| 11356 | Patient183D  | Patient222D  |
| 11356 | Patient183E  | Patient252A  |
| 11356 | Patient196A  | Patient230D  |
| 11356 | Patient201A  | Patient206   |
| 11356 | Patient206   | Patient218B  |
| 11356 | Patient206   | Patient220A  |
| 11356 | Patient230A  | Patient232A  |
| 11356 | Patient230A  | Patient232C  |
| 11356 | Patient230D  | Patient232B  |
| 11356 | Patient230E  | Patient232B  |
| 11356 | Patient252A  | Patient258B  |
| 11356 | Patient252A  | Patient258G  |
| 11357 | Patient021A2 | Patient045B  |
| 11357 | Patient026D  | Patient246D  |
| 11357 | Patient026E  | Patient246B  |
| 11357 | Patient026E  | Patient247A  |
| 11357 | Patient034A  | Patient232D  |
| 11357 | Patient045A  | Patient099A  |
| 11357 | Patient045A  | Patient222B  |
| 11357 | Patient045C  | Patient218B  |
| 11357 | Patient092B  | Patient093A  |
| 11357 | Patient092E  | Patient094E  |
| 11357 | Patient093D  | Patient103B  |
| 11357 | Patient094C  | Patient224A  |
| 11357 | Patient097A  | Patient258D  |
| 11357 | Patient109D  | Patient183B  |
| 11357 | Patient109D  | Patient183E  |
| 11357 | Patient126E  | Patient183C  |
| 11357 | Patient149B  | Patient206   |
| 11357 | Patient150C  | Patient236A  |

|       |             |             |
|-------|-------------|-------------|
| 11357 | Patient150C | Patient265  |
| 11357 | Patient183A | Patient189A |
| 11357 | Patient183A | Patient189B |
| 11357 | Patient183B | Patient252B |
| 11357 | Patient183C | Patient196A |
| 11357 | Patient183C | Patient196C |
| 11357 | Patient183C | Patient222A |
| 11357 | Patient184  | Patient261C |
| 11357 | Patient196B | Patient230D |
| 11357 | Patient196E | Patient230D |
| 11357 | Patient206  | Patient263B |
| 11357 | Patient222D | Patient230D |
| 11357 | Patient230A | Patient232E |
| 11357 | Patient232D | Patient261A |
| 11357 | Patient247B | Patient261E |
| 11357 | Patient247C | Patient261E |
| 11357 | Patient252A | Patient258F |
| 11358 | Patient026D | Patient246E |
| 11358 | Patient034E | Patient232D |
| 11358 | Patient045A | Patient196A |
| 11358 | Patient045A | Patient196C |
| 11358 | Patient045B | Patient218B |
| 11358 | Patient045C | Patient187  |
| 11358 | Patient081C | Patient126D |
| 11358 | Patient092A | Patient094E |
| 11358 | Patient092D | Patient222C |
| 11358 | Patient092E | Patient094C |
| 11358 | Patient093A | Patient103C |
| 11358 | Patient093E | Patient103B |
| 11358 | Patient094B | Patient103B |
| 11358 | Patient097A | Patient258B |
| 11358 | Patient097A | Patient258G |
| 11358 | Patient097E | Patient258B |
| 11358 | Patient097E | Patient258G |
| 11358 | Patient099C | Patient206  |
| 11358 | Patient099D | Patient230D |
| 11358 | Patient100A | Patient230A |
| 11358 | Patient127A | Patient183D |
| 11358 | Patient141A | Patient232A |
| 11358 | Patient141A | Patient232C |
| 11358 | Patient141C | Patient232A |
| 11358 | Patient141C | Patient232C |
| 11358 | Patient141C | Patient232E |
| 11358 | Patient150A | Patient187  |
| 11358 | Patient161B | Patient218B |
| 11358 | Patient183A | Patient201A |
| 11358 | Patient183A | Patient232B |
| 11358 | Patient183C | Patient222F |
| 11358 | Patient183D | Patient201B |
| 11358 | Patient183E | Patient252B |

|       |              |              |
|-------|--------------|--------------|
| 11358 | Patient201B  | Patient230D  |
| 11358 | Patient201E  | Patient261C  |
| 11358 | Patient230D  | Patient247E  |
| 11358 | Patient232B  | Patient261D  |
| 11358 | Patient252A  | Patient258A2 |
| 11358 | Patient252B  | Patient258B  |
| 11358 | Patient252B  | Patient258G  |
| 11359 | Patient021A1 | Patient045C  |
| 11359 | Patient026E  | Patient247B  |
| 11359 | Patient026E  | Patient247C  |
| 11359 | Patient026F  | Patient232B  |
| 11359 | Patient028   | Patient074E  |
| 11359 | Patient034A  | Patient045D  |
| 11359 | Patient034C  | Patient232D  |
| 11359 | Patient045A  | Patient099C  |
| 11359 | Patient045A  | Patient222F  |
| 11359 | Patient045A  | Patient232B  |
| 11359 | Patient045B  | Patient187   |
| 11359 | Patient079B  | Patient183B  |
| 11359 | Patient079B  | Patient183E  |
| 11359 | Patient081E  | Patient196F  |
| 11359 | Patient092B  | Patient093D  |
| 11359 | Patient092B  | Patient094D  |
| 11359 | Patient092D  | Patient196F  |
| 11359 | Patient093D  | Patient103C  |
| 11359 | Patient097A  | Patient258F  |
| 11359 | Patient097E  | Patient258F  |
| 11359 | Patient099B  | Patient183B  |
| 11359 | Patient099B  | Patient183E  |
| 11359 | Patient108B1 | Patient145A  |
| 11359 | Patient108B2 | Patient145A  |
| 11359 | Patient108F  | Patient183B  |
| 11359 | Patient109A  | Patient183B  |
| 11359 | Patient109A  | Patient183E  |
| 11359 | Patient123C  | Patient232B  |
| 11359 | Patient126D  | Patient150B  |
| 11359 | Patient141A  | Patient232E  |
| 11359 | Patient149B  | Patient261C  |
| 11359 | Patient150A  | Patient218B  |
| 11359 | Patient150C  | Patient222F  |
| 11359 | Patient161B  | Patient218A  |
| 11359 | Patient183B  | Patient236A  |
| 11359 | Patient183C  | Patient196B  |
| 11359 | Patient183C  | Patient196E  |
| 11359 | Patient183C  | Patient222E  |
| 11359 | Patient183C  | Patient252F  |
| 11359 | Patient183C  | Patient265   |
| 11359 | Patient183E  | Patient236A  |
| 11359 | Patient196D  | Patient261C  |
| 11359 | Patient232D  | Patient261E  |

|       |              |              |
|-------|--------------|--------------|
| 11359 | Patient246E  | Patient261E  |
| 11359 | Patient252B  | Patient258F  |
| 11360 | Patient021A1 | Patient045B  |
| 11360 | Patient022B  | Patient093C  |
| 11360 | Patient026E  | Patient232D  |
| 11360 | Patient045A  | Patient196B  |
| 11360 | Patient045A  | Patient196E  |
| 11360 | Patient045A  | Patient236A  |
| 11360 | Patient045C  | Patient222B  |
| 11360 | Patient081E  | Patient222C  |
| 11360 | Patient092A  | Patient094C  |
| 11360 | Patient093B  | Patient235E  |
| 11360 | Patient093E  | Patient103C  |
| 11360 | Patient094A  | Patient235B  |
| 11360 | Patient094B  | Patient103C  |
| 11360 | Patient094C  | Patient192F  |
| 11360 | Patient097A  | Patient258A2 |
| 11360 | Patient097E  | Patient258A2 |
| 11360 | Patient099A  | Patient183B  |
| 11360 | Patient099B  | Patient150C  |
| 11360 | Patient099C  | Patient183B  |
| 11360 | Patient108D  | Patient183C  |
| 11360 | Patient108F  | Patient183E  |
| 11360 | Patient109B  | Patient183B  |
| 11360 | Patient109B  | Patient183E  |
| 11360 | Patient120B  | Patient205   |
| 11360 | Patient123B  | Patient232B  |
| 11360 | Patient126D  | Patient235F  |
| 11360 | Patient127B  | Patient183D  |
| 11360 | Patient141B  | Patient232A  |
| 11360 | Patient141B  | Patient232C  |
| 11360 | Patient150C  | Patient196A  |
| 11360 | Patient150C  | Patient232C  |
| 11360 | Patient150C  | Patient232E  |
| 11360 | Patient177   | Patient246A  |
| 11360 | Patient183D  | Patient196D  |
| 11360 | Patient183D  | Patient201E  |
| 11360 | Patient220B  | Patient252D  |
| 11360 | Patient232A  | Patient261B  |
| 11360 | Patient232C  | Patient261B  |
| 11360 | Patient252B  | Patient258A2 |
| 11360 | Patient252F  | Patient258A1 |
| 11360 | Patient252F  | Patient258D  |
| 11361 | Patient022B  | Patient131   |
| 11361 | Patient034B  | Patient232A  |
| 11361 | Patient034B  | Patient232C  |
| 11361 | Patient034D  | Patient232D  |
| 11361 | Patient034E  | Patient045D  |
| 11361 | Patient045A  | Patient222A  |
| 11361 | Patient045A  | Patient265   |



|       |              |              |
|-------|--------------|--------------|
| 11361 | Patient045B  | Patient222B  |
| 11361 | Patient066F  | Patient232B  |
| 11361 | Patient081F  | Patient196F  |
| 11361 | Patient092B  | Patient093E  |
| 11361 | Patient092B  | Patient094B  |
| 11361 | Patient092H  | Patient126D  |
| 11361 | Patient093B  | Patient173A  |
| 11361 | Patient093D  | Patient235C  |
| 11361 | Patient097D  | Patient258A1 |
| 11361 | Patient099A  | Patient183E  |
| 11361 | Patient099C  | Patient183E  |
| 11361 | Patient100A  | Patient213A  |
| 11361 | Patient108A  | Patient206   |
| 11361 | Patient120D  | Patient205   |
| 11361 | Patient126E  | Patient183B  |
| 11361 | Patient126E  | Patient183E  |
| 11361 | Patient127A  | Patient230D  |
| 11361 | Patient141B  | Patient232E  |
| 11361 | Patient145C  | Patient232D  |
| 11361 | Patient150A  | Patient222B  |
| 11361 | Patient150B  | Patient236B  |
| 11361 | Patient150C  | Patient196C  |
| 11361 | Patient150C  | Patient232A  |
| 11361 | Patient183A  | Patient246B  |
| 11361 | Patient183B  | Patient196A  |
| 11361 | Patient183B  | Patient196C  |
| 11361 | Patient183D  | Patient247E  |
| 11361 | Patient183E  | Patient196A  |
| 11361 | Patient183E  | Patient196C  |
| 11361 | Patient201A  | Patient261C  |
| 11361 | Patient206   | Patient246C  |
| 11361 | Patient230B  | Patient232B  |
| 11361 | Patient232E  | Patient261B  |
| 11361 | Patient246A  | Patient261C  |
| 11361 | Patient246C  | Patient261C  |
| 11362 | Patient026E  | Patient246D  |
| 11362 | Patient034B  | Patient232E  |
| 11362 | Patient045B  | Patient099B  |
| 11362 | Patient045C  | Patient099B  |
| 11362 | Patient066D  | Patient232B  |
| 11362 | Patient081F  | Patient222C  |
| 11362 | Patient093C  | Patient120A  |
| 11362 | Patient099A  | Patient150C  |
| 11362 | Patient099D  | Patient183C  |
| 11362 | Patient099D  | Patient206   |
| 11362 | Patient099E  | Patient150B  |
| 11362 | Patient100A  | Patient230E  |
| 11362 | Patient108B1 | Patient123D  |
| 11362 | Patient108B2 | Patient123D  |
| 11362 | Patient131   | Patient217J  |

|       |             |             |
|-------|-------------|-------------|
| 11362 | Patient150A | Patient236A |
| 11362 | Patient150A | Patient265  |
| 11362 | Patient150C | Patient196B |
| 11362 | Patient150C | Patient196E |
| 11362 | Patient150C | Patient222E |
| 11362 | Patient161B | Patient187  |
| 11362 | Patient161B | Patient232B |
| 11362 | Patient183B | Patient222A |
| 11362 | Patient183B | Patient222F |
| 11362 | Patient183B | Patient252F |
| 11362 | Patient183C | Patient201B |
| 11362 | Patient183C | Patient222D |
| 11362 | Patient183E | Patient222A |
| 11362 | Patient183E | Patient222F |
| 11362 | Patient230A | Patient232D |
| 11362 | Patient230F | Patient232B |
| 11362 | Patient246D | Patient261E |
| 11362 | Patient261C | Patient263B |
| 11363 | Patient022B | Patient252B |
| 11363 | Patient026E | Patient246E |
| 11363 | Patient032B | Patient196F |
| 11363 | Patient045A | Patient099D |
| 11363 | Patient045A | Patient222E |
| 11363 | Patient045B | Patient099A |
| 11363 | Patient045C | Patient099A |
| 11363 | Patient066E | Patient232B |
| 11363 | Patient079C | Patient206  |
| 11363 | Patient081D | Patient126D |
| 11363 | Patient092B | Patient094E |
| 11363 | Patient094B | Patient235C |
| 11363 | Patient097D | Patient258B |
| 11363 | Patient097D | Patient258D |
| 11363 | Patient097D | Patient258G |
| 11363 | Patient099C | Patient150C |
| 11363 | Patient120C | Patient205  |
| 11363 | Patient123A | Patient232A |
| 11363 | Patient123A | Patient232C |
| 11363 | Patient126D | Patient192C |
| 11363 | Patient126D | Patient217J |
| 11363 | Patient127A | Patient206  |
| 11363 | Patient127B | Patient230D |
| 11363 | Patient141C | Patient232D |
| 11363 | Patient150A | Patient222F |
| 11363 | Patient150C | Patient222A |
| 11363 | Patient183B | Patient196B |
| 11363 | Patient183B | Patient196E |
| 11363 | Patient183B | Patient222E |
| 11363 | Patient183B | Patient265  |
| 11363 | Patient183D | Patient189E |
| 11363 | Patient183E | Patient222E |

|       |             |             |
|-------|-------------|-------------|
| 11363 | Patient183E | Patient265  |
| 11363 | Patient184  | Patient230D |
| 11363 | Patient201E | Patient230D |
| 11363 | Patient206  | Patient246B |
| 11363 | Patient230D | Patient232A |
| 11363 | Patient230D | Patient232C |
| 11363 | Patient230E | Patient232A |
| 11363 | Patient230E | Patient232C |
| 11363 | Patient232A | Patient261C |
| 11363 | Patient232C | Patient261C |
| 11363 | Patient232E | Patient261C |
| 11363 | Patient252F | Patient258B |
| 11363 | Patient252F | Patient258G |
| 11364 | Patient022B | Patient252A |
| 11364 | Patient026B | Patient232B |
| 11364 | Patient034C | Patient045D |
| 11364 | Patient034D | Patient045D |
| 11364 | Patient045A | Patient189A |
| 11364 | Patient045A | Patient189E |
| 11364 | Patient045A | Patient247E |
| 11364 | Patient045B | Patient196A |
| 11364 | Patient045B | Patient196C |
| 11364 | Patient045B | Patient232B |
| 11364 | Patient045B | Patient236A |
| 11364 | Patient045C | Patient196A |
| 11364 | Patient045C | Patient196C |
| 11364 | Patient045C | Patient232B |
| 11364 | Patient045C | Patient236A |
| 11364 | Patient081B | Patient196F |
| 11364 | Patient081E | Patient126D |
| 11364 | Patient092B | Patient094C |
| 11364 | Patient093A | Patient235C |
| 11364 | Patient094C | Patient103B |
| 11364 | Patient094D | Patient235F |
| 11364 | Patient097C | Patient206  |
| 11364 | Patient097D | Patient258F |
| 11364 | Patient099E | Patient161B |
| 11364 | Patient100A | Patient217J |
| 11364 | Patient108D | Patient183B |
| 11364 | Patient108D | Patient183E |
| 11364 | Patient109C | Patient206  |
| 11364 | Patient123A | Patient232E |
| 11364 | Patient126D | Patient192A |
| 11364 | Patient126D | Patient235E |
| 11364 | Patient127A | Patient183C |
| 11364 | Patient127B | Patient206  |
| 11364 | Patient141A | Patient232D |
| 11364 | Patient146  | Patient220B |
| 11364 | Patient149B | Patient183D |
| 11364 | Patient149B | Patient230D |

|       |             |              |
|-------|-------------|--------------|
| 11364 | Patient150B | Patient189E  |
| 11364 | Patient150B | Patient218A  |
| 11364 | Patient150C | Patient222D  |
| 11364 | Patient183D | Patient184   |
| 11364 | Patient183D | Patient201A  |
| 11364 | Patient183D | Patient246A  |
| 11364 | Patient183D | Patient263B  |
| 11364 | Patient183E | Patient196B  |
| 11364 | Patient183E | Patient196E  |
| 11364 | Patient183E | Patient252F  |
| 11364 | Patient220B | Patient247E  |
| 11364 | Patient230D | Patient232E  |
| 11364 | Patient230E | Patient232E  |
| 11364 | Patient252F | Patient258F  |
| 11365 | Patient023  | Patient092H  |
| 11365 | Patient026A | Patient232B  |
| 11365 | Patient032B | Patient222C  |
| 11365 | Patient045A | Patient127A  |
| 11365 | Patient045A | Patient222D  |
| 11365 | Patient045B | Patient099C  |
| 11365 | Patient045B | Patient222F  |
| 11365 | Patient045C | Patient099C  |
| 11365 | Patient045C | Patient222F  |
| 11365 | Patient092D | Patient263A  |
| 11365 | Patient093C | Patient195   |
| 11365 | Patient097B | Patient258A1 |
| 11365 | Patient097B | Patient258D  |
| 11365 | Patient097C | Patient258A1 |
| 11365 | Patient097C | Patient258D  |
| 11365 | Patient097D | Patient258A2 |
| 11365 | Patient099B | Patient150A  |
| 11365 | Patient108G | Patient206   |
| 11365 | Patient121A | Patient196F  |
| 11365 | Patient126D | Patient192B  |
| 11365 | Patient141B | Patient232D  |
| 11365 | Patient150A | Patient196A  |
| 11365 | Patient150A | Patient196C  |
| 11365 | Patient150A | Patient232C  |
| 11365 | Patient150A | Patient232E  |
| 11365 | Patient150B | Patient189A  |
| 11365 | Patient150C | Patient247E  |
| 11365 | Patient161B | Patient236A  |
| 11365 | Patient183A | Patient232C  |
| 11365 | Patient183A | Patient247A  |
| 11365 | Patient183D | Patient189A  |
| 11365 | Patient183D | Patient189B  |
| 11365 | Patient183D | Patient246C  |
| 11365 | Patient213B | Patient235A  |
| 11365 | Patient232A | Patient261D  |
| 11365 | Patient232C | Patient261D  |

|       |              |              |
|-------|--------------|--------------|
| 11365 | Patient235A  | Patient252D  |
| 11365 | Patient246B  | Patient261C  |
| 11365 | Patient252F  | Patient258A2 |
| 11366 | Patient022B  | Patient104B  |
| 11366 | Patient022B  | Patient247A  |
| 11366 | Patient023   | Patient192A  |
| 11366 | Patient023   | Patient192C  |
| 11366 | Patient045A  | Patient189B  |
| 11366 | Patient045A  | Patient201B  |
| 11366 | Patient045B  | Patient196B  |
| 11366 | Patient045B  | Patient196E  |
| 11366 | Patient045C  | Patient196B  |
| 11366 | Patient045C  | Patient196E  |
| 11366 | Patient045C  | Patient222A  |
| 11366 | Patient045C  | Patient265   |
| 11366 | Patient045D  | Patient145C  |
| 11366 | Patient079A1 | Patient206   |
| 11366 | Patient079A2 | Patient206   |
| 11366 | Patient081B  | Patient222C  |
| 11366 | Patient081E  | Patient263A  |
| 11366 | Patient093E  | Patient235C  |
| 11366 | Patient094C  | Patient103C  |
| 11366 | Patient094C  | Patient235C  |
| 11366 | Patient094E  | Patient235F  |
| 11366 | Patient099D  | Patient183B  |
| 11366 | Patient099D  | Patient183E  |
| 11366 | Patient108B1 | Patient206   |
| 11366 | Patient108B2 | Patient206   |
| 11366 | Patient109E  | Patient206   |
| 11366 | Patient121A  | Patient222C  |
| 11366 | Patient123C  | Patient232A  |
| 11366 | Patient123C  | Patient232C  |
| 11366 | Patient127A  | Patient150C  |
| 11366 | Patient127B  | Patient183C  |
| 11366 | Patient145A  | Patient232B  |
| 11366 | Patient150A  | Patient222A  |
| 11366 | Patient150A  | Patient232A  |
| 11366 | Patient150B  | Patient189B  |
| 11366 | Patient150B  | Patient232B  |
| 11366 | Patient150C  | Patient232D  |
| 11366 | Patient183A  | Patient232A  |
| 11366 | Patient183A  | Patient246D  |
| 11366 | Patient183A  | Patient247B  |
| 11366 | Patient183B  | Patient201B  |
| 11366 | Patient183B  | Patient222D  |
| 11366 | Patient183C  | Patient196D  |
| 11366 | Patient183C  | Patient201E  |
| 11366 | Patient183C  | Patient247E  |
| 11366 | Patient183E  | Patient201B  |
| 11366 | Patient183E  | Patient222D  |

|       |              |             |
|-------|--------------|-------------|
| 11366 | Patient196D  | Patient230D |
| 11366 | Patient201A  | Patient230D |
| 11366 | Patient232D  | Patient261B |
| 11366 | Patient232E  | Patient261D |
| 11367 | Patient026D  | Patient045D |
| 11367 | Patient034B  | Patient232D |
| 11367 | Patient045A  | Patient127B |
| 11367 | Patient045B  | Patient222A |
| 11367 | Patient045B  | Patient265  |
| 11367 | Patient045C  | Patient247E |
| 11367 | Patient045D  | Patient261A |
| 11367 | Patient081A2 | Patient146  |
| 11367 | Patient081A2 | Patient196F |
| 11367 | Patient093D  | Patient235B |
| 11367 | Patient099A  | Patient150A |
| 11367 | Patient121A  | Patient146  |
| 11367 | Patient123C  | Patient232E |
| 11367 | Patient141D  | Patient196F |
| 11367 | Patient146   | Patient206  |
| 11367 | Patient150A  | Patient196B |
| 11367 | Patient150A  | Patient196E |
| 11367 | Patient150A  | Patient222E |
| 11367 | Patient150C  | Patient201E |
| 11367 | Patient159   | Patient220B |
| 11367 | Patient161B  | Patient222F |
| 11367 | Patient177   | Patient247A |
| 11367 | Patient183A  | Patient246E |
| 11367 | Patient183D  | Patient232B |
| 11367 | Patient230D  | Patient246A |
| 11367 | Patient247A  | Patient261C |
| 11368 | Patient022B  | Patient247C |
| 11368 | Patient023   | Patient192B |
| 11368 | Patient026F  | Patient232A |
| 11368 | Patient026F  | Patient232C |
| 11368 | Patient026F  | Patient232E |
| 11368 | Patient045A  | Patient232C |
| 11368 | Patient045A  | Patient232E |
| 11368 | Patient045B  | Patient247E |
| 11368 | Patient045C  | Patient189A |
| 11368 | Patient045C  | Patient189E |
| 11368 | Patient045C  | Patient222E |
| 11368 | Patient081A2 | Patient222C |
| 11368 | Patient081F  | Patient126D |
| 11368 | Patient081F  | Patient263A |
| 11368 | Patient093A  | Patient235B |
| 11368 | Patient093C  | Patient235C |
| 11368 | Patient094D  | Patient235E |
| 11368 | Patient097B  | Patient258B |
| 11368 | Patient097B  | Patient258G |
| 11368 | Patient097C  | Patient258B |

|       |              |             |
|-------|--------------|-------------|
| 11368 | Patient097C  | Patient258G |
| 11368 | Patient099C  | Patient150A |
| 11368 | Patient099D  | Patient150C |
| 11368 | Patient108H  | Patient206  |
| 11368 | Patient123B  | Patient232A |
| 11368 | Patient123B  | Patient232C |
| 11368 | Patient123D  | Patient232B |
| 11368 | Patient127A  | Patient183B |
| 11368 | Patient127A  | Patient183E |
| 11368 | Patient127B  | Patient150C |
| 11368 | Patient131   | Patient192D |
| 11368 | Patient150B  | Patient187  |
| 11368 | Patient150B  | Patient222B |
| 11368 | Patient150C  | Patient201B |
| 11368 | Patient177   | Patient247B |
| 11368 | Patient183A  | Patient232E |
| 11368 | Patient183A  | Patient247C |
| 11368 | Patient206   | Patient232B |
| 11368 | Patient230B  | Patient232A |
| 11368 | Patient230B  | Patient232C |
| 11368 | Patient230D  | Patient246C |
| 11368 | Patient230D  | Patient263B |
| 11369 | Patient021A2 | Patient161B |
| 11369 | Patient022B  | Patient157  |
| 11369 | Patient022B  | Patient247B |
| 11369 | Patient034B  | Patient045D |
| 11369 | Patient045A  | Patient196D |
| 11369 | Patient045A  | Patient201E |
| 11369 | Patient045A  | Patient232A |
| 11369 | Patient045B  | Patient099D |
| 11369 | Patient045B  | Patient222E |
| 11369 | Patient045C  | Patient099D |
| 11369 | Patient066D  | Patient232A |
| 11369 | Patient066D  | Patient232C |
| 11369 | Patient066F  | Patient232A |
| 11369 | Patient066F  | Patient232C |
| 11369 | Patient081B  | Patient126D |
| 11369 | Patient081B  | Patient146  |
| 11369 | Patient094B  | Patient235B |
| 11369 | Patient094D  | Patient173A |
| 11369 | Patient097B  | Patient258F |
| 11369 | Patient097C  | Patient258F |
| 11369 | Patient121B  | Patient196F |
| 11369 | Patient123A  | Patient232D |
| 11369 | Patient123B  | Patient232E |
| 11369 | Patient126E  | Patient220B |
| 11369 | Patient141D  | Patient222C |
| 11369 | Patient149B  | Patient183C |
| 11369 | Patient150A  | Patient201B |
| 11369 | Patient150A  | Patient222D |

|       |              |              |
|-------|--------------|--------------|
| 11369 | Patient150B  | Patient218B  |
| 11369 | Patient161B  | Patient196A  |
| 11369 | Patient161B  | Patient196C  |
| 11369 | Patient161B  | Patient232A  |
| 11369 | Patient161B  | Patient232C  |
| 11369 | Patient177   | Patient247C  |
| 11369 | Patient183C  | Patient184   |
| 11369 | Patient183C  | Patient189E  |
| 11369 | Patient184   | Patient206   |
| 11369 | Patient230B  | Patient232E  |
| 11369 | Patient230D  | Patient232D  |
| 11369 | Patient232D  | Patient261C  |
| 11369 | Patient247B  | Patient261C  |
| 11369 | Patient247C  | Patient261C  |
| 11370 | Patient021A2 | Patient177   |
| 11370 | Patient022B  | Patient246A  |
| 11370 | Patient022B  | Patient247E  |
| 11370 | Patient045A  | Patient149B  |
| 11370 | Patient045B  | Patient189A  |
| 11370 | Patient045B  | Patient189E  |
| 11370 | Patient045C  | Patient189B  |
| 11370 | Patient045C  | Patient201B  |
| 11370 | Patient045C  | Patient222D  |
| 11370 | Patient066D  | Patient232E  |
| 11370 | Patient066E  | Patient232A  |
| 11370 | Patient066E  | Patient232C  |
| 11370 | Patient066F  | Patient232E  |
| 11370 | Patient081E  | Patient146   |
| 11370 | Patient081F  | Patient146   |
| 11370 | Patient094E  | Patient235E  |
| 11370 | Patient097B  | Patient258A2 |
| 11370 | Patient097C  | Patient258A2 |
| 11370 | Patient097D  | Patient206   |
| 11370 | Patient100A  | Patient230F  |
| 11370 | Patient109D  | Patient206   |
| 11370 | Patient121B  | Patient222C  |
| 11370 | Patient126C  | Patient126E  |
| 11370 | Patient127B  | Patient183B  |
| 11370 | Patient127B  | Patient183E  |
| 11370 | Patient141C  | Patient196F  |
| 11370 | Patient146   | Patient150C  |
| 11370 | Patient146   | Patient261G  |
| 11370 | Patient150A  | Patient201E  |
| 11370 | Patient150A  | Patient247E  |
| 11370 | Patient161B  | Patient222E  |
| 11370 | Patient161B  | Patient232E  |
| 11370 | Patient161B  | Patient265   |
| 11370 | Patient183B  | Patient196D  |
| 11370 | Patient183B  | Patient201E  |
| 11370 | Patient183B  | Patient247E  |



|       |              |             |
|-------|--------------|-------------|
| 11370 | Patient183C  | Patient189A |
| 11370 | Patient183C  | Patient189B |
| 11370 | Patient183C  | Patient201A |
| 11370 | Patient183C  | Patient246A |
| 11370 | Patient183C  | Patient246C |
| 11370 | Patient183C  | Patient263B |
| 11370 | Patient183D  | Patient246B |
| 11370 | Patient183E  | Patient196D |
| 11370 | Patient183E  | Patient201E |
| 11370 | Patient183E  | Patient247E |
| 11370 | Patient206   | Patient246E |
| 11370 | Patient230E  | Patient232D |
| 11370 | Patient230F  | Patient232A |
| 11370 | Patient230F  | Patient232C |
| 11371 | Patient021A1 | Patient161B |
| 11371 | Patient021A1 | Patient177  |
| 11371 | Patient026E  | Patient045D |
| 11371 | Patient032A  | Patient196F |
| 11371 | Patient045B  | Patient127A |
| 11371 | Patient045B  | Patient201B |
| 11371 | Patient045B  | Patient222D |
| 11371 | Patient045C  | Patient127A |
| 11371 | Patient081A2 | Patient126D |
| 11371 | Patient081B  | Patient263A |
| 11371 | Patient099E  | Patient220B |
| 11371 | Patient127A  | Patient150A |
| 11371 | Patient141A  | Patient196F |
| 11371 | Patient141B  | Patient196F |
| 11371 | Patient146   | Patient167  |
| 11371 | Patient150A  | Patient232D |
| 11371 | Patient150C  | Patient196D |
| 11371 | Patient161B  | Patient196B |
| 11371 | Patient161B  | Patient196E |
| 11371 | Patient161B  | Patient222A |
| 11371 | Patient206   | Patient246D |
| 11371 | Patient232D  | Patient261D |
| 11371 | Patient235A  | Patient246A |
| 11371 | Patient246E  | Patient261C |
| 11372 | Patient026B  | Patient232A |
| 11372 | Patient026B  | Patient232C |
| 11372 | Patient032B  | Patient100A |
| 11372 | Patient045A  | Patient100A |
| 11372 | Patient045A  | Patient246C |
| 11372 | Patient045B  | Patient189B |
| 11372 | Patient066E  | Patient232E |
| 11372 | Patient081A1 | Patient146  |
| 11372 | Patient081A1 | Patient196F |
| 11372 | Patient093E  | Patient235B |
| 11372 | Patient094C  | Patient235B |
| 11372 | Patient099B  | Patient161B |

|       |              |             |
|-------|--------------|-------------|
| 11372 | Patient100A  | Patient230B |
| 11372 | Patient108F  | Patient206  |
| 11372 | Patient123C  | Patient232D |
| 11372 | Patient126D  | Patient192E |
| 11372 | Patient146   | Patient150A |
| 11372 | Patient149B  | Patient150C |
| 11372 | Patient150B  | Patient236A |
| 11372 | Patient150B  | Patient265  |
| 11372 | Patient150C  | Patient246C |
| 11372 | Patient161B  | Patient222D |
| 11372 | Patient183A  | Patient232D |
| 11372 | Patient183B  | Patient263B |
| 11372 | Patient183C  | Patient232B |
| 11372 | Patient220B  | Patient236B |
| 11372 | Patient220B  | Patient246A |
| 11372 | Patient230D  | Patient246B |
| 11372 | Patient230D  | Patient247A |
| 11372 | Patient230F  | Patient232E |
| 11372 | Patient246D  | Patient261C |
| 11373 | Patient021A2 | Patient150C |
| 11373 | Patient022B  | Patient104A |
| 11373 | Patient022B  | Patient252F |
| 11373 | Patient026A  | Patient232A |
| 11373 | Patient026A  | Patient232C |
| 11373 | Patient026B  | Patient232E |
| 11373 | Patient032A  | Patient222C |
| 11373 | Patient032B  | Patient263A |
| 11373 | Patient045A  | Patient184  |
| 11373 | Patient045A  | Patient201A |
| 11373 | Patient045A  | Patient246A |
| 11373 | Patient045B  | Patient127B |
| 11373 | Patient045C  | Patient127B |
| 11373 | Patient045C  | Patient232A |
| 11373 | Patient045C  | Patient232C |
| 11373 | Patient045D  | Patient261B |
| 11373 | Patient081A1 | Patient222C |
| 11373 | Patient092A  | Patient126D |
| 11373 | Patient092E  | Patient126D |
| 11373 | Patient094E  | Patient173A |
| 11373 | Patient099A  | Patient161B |
| 11373 | Patient099D  | Patient150A |
| 11373 | Patient100A  | Patient141D |
| 11373 | Patient109A  | Patient206  |
| 11373 | Patient109B  | Patient206  |
| 11373 | Patient127B  | Patient150A |
| 11373 | Patient141A  | Patient222C |
| 11373 | Patient141B  | Patient222C |
| 11373 | Patient141C  | Patient222C |
| 11373 | Patient145A  | Patient232A |
| 11373 | Patient145A  | Patient232C |

|       |             |             |
|-------|-------------|-------------|
| 11373 | Patient149B | Patient183B |
| 11373 | Patient149B | Patient183E |
| 11373 | Patient150B | Patient222F |
| 11373 | Patient150C | Patient246A |
| 11373 | Patient161B | Patient247E |
| 11373 | Patient183B | Patient189E |
| 11373 | Patient183D | Patient232C |
| 11373 | Patient183D | Patient247A |
| 11373 | Patient183E | Patient184  |
| 11373 | Patient183E | Patient189E |
| 11374 | Patient023  | Patient192E |
| 11374 | Patient026A | Patient232E |
| 11374 | Patient026C | Patient131  |
| 11374 | Patient045A | Patient263B |
| 11374 | Patient045B | Patient232A |
| 11374 | Patient045B | Patient232C |
| 11374 | Patient045B | Patient232E |
| 11374 | Patient045C | Patient201E |
| 11374 | Patient045C | Patient232E |
| 11374 | Patient086C | Patient222C |
| 11374 | Patient093C | Patient235B |
| 11374 | Patient120D | Patient210  |
| 11374 | Patient123B | Patient232D |
| 11374 | Patient145A | Patient232E |
| 11374 | Patient150C | Patient184  |
| 11374 | Patient161B | Patient201B |
| 11374 | Patient177  | Patient247E |
| 11374 | Patient183B | Patient184  |
| 11374 | Patient183B | Patient189A |
| 11374 | Patient183B | Patient201A |
| 11374 | Patient183B | Patient246A |
| 11374 | Patient183B | Patient246C |
| 11374 | Patient183D | Patient232A |
| 11374 | Patient183D | Patient247B |
| 11374 | Patient183E | Patient201A |
| 11374 | Patient183E | Patient246A |
| 11374 | Patient183E | Patient246C |
| 11374 | Patient183E | Patient263B |
| 11374 | Patient206  | Patient232A |
| 11374 | Patient206  | Patient232C |
| 11374 | Patient220B | Patient222B |
| 11374 | Patient230B | Patient232D |
| 11374 | Patient230D | Patient247B |
| 11374 | Patient230D | Patient247C |
| 11375 | Patient022B | Patient093B |
| 11375 | Patient023  | Patient092E |
| 11375 | Patient034A | Patient196F |
| 11375 | Patient045A | Patient232D |
| 11375 | Patient045B | Patient196D |
| 11375 | Patient045B | Patient201E |

|       |              |             |
|-------|--------------|-------------|
| 11375 | Patient045C  | Patient149B |
| 11375 | Patient045C  | Patient196D |
| 11375 | Patient066D  | Patient232D |
| 11375 | Patient066F  | Patient232D |
| 11375 | Patient079B  | Patient206  |
| 11375 | Patient081A2 | Patient263A |
| 11375 | Patient086C  | Patient196F |
| 11375 | Patient099B  | Patient150B |
| 11375 | Patient099C  | Patient161B |
| 11375 | Patient121A  | Patient263A |
| 11375 | Patient123D  | Patient232A |
| 11375 | Patient123D  | Patient232C |
| 11375 | Patient150B  | Patient196A |
| 11375 | Patient150B  | Patient196C |
| 11375 | Patient150B  | Patient232C |
| 11375 | Patient150B  | Patient232E |
| 11375 | Patient150C  | Patient201A |
| 11375 | Patient150C  | Patient263B |
| 11375 | Patient183B  | Patient189B |
| 11375 | Patient183C  | Patient246B |
| 11375 | Patient183D  | Patient246D |
| 11375 | Patient183D  | Patient247C |
| 11375 | Patient183E  | Patient189A |
| 11375 | Patient183E  | Patient189B |
| 11375 | Patient218A  | Patient220B |
| 11375 | Patient220A  | Patient220B |
| 11375 | Patient220B  | Patient246C |
| 11376 | Patient021A1 | Patient150C |
| 11376 | Patient023   | Patient092A |
| 11376 | Patient026F  | Patient232D |
| 11376 | Patient034C  | Patient196F |
| 11376 | Patient045A  | Patient247A |
| 11376 | Patient045B  | Patient149B |
| 11376 | Patient081A1 | Patient126D |
| 11376 | Patient123D  | Patient232E |
| 11376 | Patient127A  | Patient161B |
| 11376 | Patient141D  | Patient263A |
| 11376 | Patient150A  | Patient196D |
| 11376 | Patient150B  | Patient222A |
| 11376 | Patient150B  | Patient232A |
| 11376 | Patient183B  | Patient232B |
| 11376 | Patient183D  | Patient232E |
| 11376 | Patient183D  | Patient246E |
| 11376 | Patient183E  | Patient232B |
| 11376 | Patient206   | Patient232E |
| 11376 | Patient220B  | Patient246B |
| 11377 | Patient034A  | Patient222C |
| 11377 | Patient034E  | Patient196F |
| 11377 | Patient066E  | Patient232D |
| 11377 | Patient093B  | Patient120A |

|       |              |             |
|-------|--------------|-------------|
| 11377 | Patient099A  | Patient150B |
| 11377 | Patient108D  | Patient206  |
| 11377 | Patient121B  | Patient146  |
| 11377 | Patient149B  | Patient150A |
| 11377 | Patient150A  | Patient246C |
| 11377 | Patient150B  | Patient196B |
| 11377 | Patient150B  | Patient196E |
| 11377 | Patient150B  | Patient222E |
| 11377 | Patient150C  | Patient246B |
| 11377 | Patient161B  | Patient232D |
| 11377 | Patient220A  | Patient235A |
| 11377 | Patient230F  | Patient232D |
| 11377 | Patient235A  | Patient247E |
| 11378 | Patient021A2 | Patient150A |
| 11378 | Patient026B  | Patient232D |
| 11378 | Patient034C  | Patient222C |
| 11378 | Patient045A  | Patient246B |
| 11378 | Patient045A  | Patient247B |
| 11378 | Patient045A  | Patient247C |
| 11378 | Patient045B  | Patient100A |
| 11378 | Patient045B  | Patient246C |
| 11378 | Patient045C  | Patient100A |
| 11378 | Patient045C  | Patient184  |
| 11378 | Patient045C  | Patient201A |
| 11378 | Patient045C  | Patient246A |
| 11378 | Patient045C  | Patient246C |
| 11378 | Patient045D  | Patient092G |
| 11378 | Patient097B  | Patient206  |
| 11378 | Patient099C  | Patient150B |
| 11378 | Patient104B  | Patient235A |
| 11378 | Patient126E  | Patient192C |
| 11378 | Patient127B  | Patient161B |
| 11378 | Patient150A  | Patient201A |
| 11378 | Patient150A  | Patient246A |
| 11378 | Patient183C  | Patient247A |
| 11378 | Patient230D  | Patient246D |
| 11378 | Patient230D  | Patient246E |
| 11379 | Patient026A  | Patient232D |
| 11379 | Patient034E  | Patient222C |
| 11379 | Patient045B  | Patient184  |
| 11379 | Patient045B  | Patient201A |
| 11379 | Patient045B  | Patient246A |
| 11379 | Patient045C  | Patient232D |
| 11379 | Patient045D  | Patient150C |
| 11379 | Patient081A1 | Patient263A |
| 11379 | Patient092B  | Patient126D |
| 11379 | Patient093B  | Patient195  |
| 11379 | Patient099D  | Patient161B |
| 11379 | Patient121B  | Patient263A |
| 11379 | Patient126E  | Patient192A |

|       |              |             |
|-------|--------------|-------------|
| 11379 | Patient126E  | Patient235F |
| 11379 | Patient141C  | Patient263A |
| 11379 | Patient145A  | Patient232D |
| 11379 | Patient150A  | Patient184  |
| 11379 | Patient150B  | Patient201B |
| 11379 | Patient150B  | Patient222D |
| 11379 | Patient150C  | Patient247A |
| 11379 | Patient157   | Patient192D |
| 11379 | Patient161B  | Patient201E |
| 11379 | Patient161B  | Patient246A |
| 11379 | Patient183B  | Patient246B |
| 11379 | Patient183C  | Patient232C |
| 11379 | Patient183E  | Patient246B |
| 11380 | Patient023   | Patient177  |
| 11380 | Patient034D  | Patient196F |
| 11380 | Patient038   | Patient074B |
| 11380 | Patient045B  | Patient232D |
| 11380 | Patient045B  | Patient263B |
| 11380 | Patient045C  | Patient263B |
| 11380 | Patient045D  | Patient123A |
| 11380 | Patient045D  | Patient261D |
| 11380 | Patient100A  | Patient261A |
| 11380 | Patient126E  | Patient192B |
| 11380 | Patient141A  | Patient263A |
| 11380 | Patient141B  | Patient263A |
| 11380 | Patient145C  | Patient222C |
| 11380 | Patient146   | Patient217A |
| 11380 | Patient146   | Patient230C |
| 11380 | Patient146   | Patient230G |
| 11380 | Patient149B  | Patient161B |
| 11380 | Patient150A  | Patient263B |
| 11380 | Patient150B  | Patient201E |
| 11380 | Patient150B  | Patient247E |
| 11380 | Patient159   | Patient177  |
| 11380 | Patient183C  | Patient232A |
| 11380 | Patient183C  | Patient246D |
| 11380 | Patient183C  | Patient247B |
| 11380 | Patient183C  | Patient247C |
| 11380 | Patient183D  | Patient232D |
| 11380 | Patient206   | Patient232D |
| 11380 | Patient218B  | Patient220B |
| 11380 | Patient220B  | Patient247A |
| 11380 | Patient220B  | Patient247C |
| 11380 | Patient235A  | Patient247A |
| 11381 | Patient021A1 | Patient150A |
| 11381 | Patient023   | Patient092B |
| 11381 | Patient032A  | Patient100A |
| 11381 | Patient032A  | Patient263A |
| 11381 | Patient045C  | Patient247A |
| 11381 | Patient045D  | Patient123C |

|       |             |             |
|-------|-------------|-------------|
| 11381 | Patient104A | Patient235A |
| 11381 | Patient123D | Patient232D |
| 11381 | Patient127A | Patient150B |
| 11381 | Patient150B | Patient232D |
| 11381 | Patient150C | Patient247B |
| 11381 | Patient161B | Patient196D |
| 11381 | Patient161B | Patient201A |
| 11381 | Patient183C | Patient232E |
| 11381 | Patient183C | Patient246E |
| 11381 | Patient187  | Patient220B |
| 11381 | Patient220B | Patient236A |
| 11381 | Patient220B | Patient246D |
| 11381 | Patient220B | Patient247B |
| 11381 | Patient235A | Patient247B |
| 11381 | Patient235A | Patient247C |
| 11382 | Patient022B | Patient094D |
| 11382 | Patient034D | Patient222C |
| 11382 | Patient045A | Patient246D |
| 11382 | Patient045B | Patient247A |
| 11382 | Patient045D | Patient145A |
| 11382 | Patient093B | Patient235C |
| 11382 | Patient145B | Patient146  |
| 11382 | Patient145C | Patient196F |
| 11382 | Patient146  | Patient217B |
| 11382 | Patient150A | Patient246B |
| 11382 | Patient157  | Patient217A |
| 11382 | Patient157  | Patient217F |
| 11382 | Patient161B | Patient246C |
| 11382 | Patient183B | Patient247A |
| 11382 | Patient196F | Patient230A |
| 11382 | Patient222C | Patient230A |
| 11382 | Patient235A | Patient236B |
| 11383 | Patient032C | Patient146  |
| 11383 | Patient038  | Patient074D |
| 11383 | Patient045A | Patient246E |
| 11383 | Patient045B | Patient246B |
| 11383 | Patient045C | Patient246B |
| 11383 | Patient045C | Patient247B |
| 11383 | Patient045C | Patient247C |
| 11383 | Patient086C | Patient263A |
| 11383 | Patient099A | Patient220B |
| 11383 | Patient099B | Patient220B |
| 11383 | Patient099D | Patient150B |
| 11383 | Patient126C | Patient232B |
| 11383 | Patient126E | Patient235E |
| 11383 | Patient127B | Patient150B |
| 11383 | Patient146  | Patient217C |
| 11383 | Patient146  | Patient217F |
| 11383 | Patient150C | Patient246D |
| 11383 | Patient150C | Patient246E |

|       |              |             |
|-------|--------------|-------------|
| 11383 | Patient150C  | Patient247C |
| 11383 | Patient157   | Patient217C |
| 11383 | Patient161B  | Patient263B |
| 11383 | Patient183B  | Patient232C |
| 11383 | Patient183E  | Patient232C |
| 11383 | Patient183E  | Patient247A |
| 11383 | Patient218A  | Patient235A |
| 11384 | Patient034A  | Patient100A |
| 11384 | Patient038   | Patient074A |
| 11384 | Patient038   | Patient074C |
| 11384 | Patient045B  | Patient247B |
| 11384 | Patient045B  | Patient247C |
| 11384 | Patient045D  | Patient150A |
| 11384 | Patient093C  | Patient177  |
| 11384 | Patient094D  | Patient120A |
| 11384 | Patient108B1 | Patient192C |
| 11384 | Patient108B2 | Patient192C |
| 11384 | Patient146   | Patient150B |
| 11384 | Patient146   | Patient217D |
| 11384 | Patient146   | Patient217E |
| 11384 | Patient146   | Patient217H |
| 11384 | Patient150A  | Patient247A |
| 11384 | Patient157   | Patient217B |
| 11384 | Patient157   | Patient217E |
| 11384 | Patient157   | Patient217H |
| 11384 | Patient159   | Patient192D |
| 11384 | Patient161B  | Patient184  |
| 11384 | Patient161B  | Patient246B |
| 11384 | Patient183B  | Patient232A |
| 11384 | Patient183B  | Patient246D |
| 11384 | Patient183B  | Patient247B |
| 11384 | Patient183B  | Patient247C |
| 11384 | Patient183E  | Patient232A |
| 11384 | Patient183E  | Patient246D |
| 11384 | Patient183E  | Patient247B |
| 11384 | Patient183E  | Patient247C |
| 11384 | Patient189E  | Patient235A |
| 11384 | Patient196D  | Patient235A |
| 11384 | Patient196F  | Patient230E |
| 11384 | Patient201B  | Patient220B |
| 11384 | Patient218B  | Patient235A |
| 11384 | Patient220B  | Patient222A |
| 11384 | Patient220B  | Patient246E |
| 11384 | Patient222C  | Patient230E |
| 11385 | Patient026C  | Patient146  |
| 11385 | Patient034A  | Patient263A |
| 11385 | Patient034B  | Patient196F |
| 11385 | Patient034C  | Patient100A |
| 11385 | Patient045D  | Patient123B |
| 11385 | Patient092H  | Patient126E |



|       |              |             |
|-------|--------------|-------------|
| 11385 | Patient094A  | Patient103D |
| 11385 | Patient108B1 | Patient192A |
| 11385 | Patient108B2 | Patient192A |
| 11385 | Patient126D  | Patient192F |
| 11385 | Patient141G  | Patient146  |
| 11385 | Patient146   | Patient217I |
| 11385 | Patient157   | Patient217D |
| 11385 | Patient157   | Patient217I |
| 11385 | Patient161B  | Patient247A |
| 11385 | Patient183B  | Patient232E |
| 11385 | Patient183B  | Patient246E |
| 11385 | Patient183C  | Patient232D |
| 11385 | Patient183E  | Patient246E |
| 11385 | Patient220B  | Patient265  |
| 11386 | Patient023   | Patient121B |
| 11386 | Patient032E  | Patient146  |
| 11386 | Patient034C  | Patient263A |
| 11386 | Patient034E  | Patient100A |
| 11386 | Patient094D  | Patient195  |
| 11386 | Patient099E  | Patient235A |
| 11386 | Patient100A  | Patient145C |
| 11386 | Patient103D  | Patient210  |
| 11386 | Patient108B1 | Patient192B |
| 11386 | Patient108B2 | Patient192B |
| 11386 | Patient108B2 | Patient235F |
| 11386 | Patient126E  | Patient192E |
| 11386 | Patient150A  | Patient247B |
| 11386 | Patient150A  | Patient247C |
| 11386 | Patient150B  | Patient196D |
| 11386 | Patient183E  | Patient232E |
| 11386 | Patient189A  | Patient235A |
| 11387 | Patient022B  | Patient094E |
| 11387 | Patient023   | Patient192F |
| 11387 | Patient026C  | Patient157  |
| 11387 | Patient034B  | Patient222C |
| 11387 | Patient034E  | Patient263A |
| 11387 | Patient045C  | Patient246D |
| 11387 | Patient086A  | Patient222C |
| 11387 | Patient086B  | Patient222C |
| 11387 | Patient108B1 | Patient235F |
| 11387 | Patient120B  | Patient210  |
| 11387 | Patient141F  | Patient146  |
| 11387 | Patient145C  | Patient263A |
| 11387 | Patient149B  | Patient150B |
| 11387 | Patient150B  | Patient246C |
| 11387 | Patient161B  | Patient247B |
| 11387 | Patient161B  | Patient247C |
| 11387 | Patient196A  | Patient220B |
| 11388 | Patient021A2 | Patient150B |
| 11388 | Patient022B  | Patient126D |

|       |              |              |
|-------|--------------|--------------|
| 11388 | Patient022B  | Patient189E  |
| 11388 | Patient038   | Patient074E  |
| 11388 | Patient045B  | Patient246D  |
| 11388 | Patient086E  | Patient222C  |
| 11388 | Patient093B  | Patient235B  |
| 11388 | Patient099C  | Patient220B  |
| 11388 | Patient099D  | Patient220B  |
| 11388 | Patient150A  | Patient246D  |
| 11388 | Patient150A  | Patient246E  |
| 11388 | Patient150B  | Patient201A  |
| 11388 | Patient150B  | Patient246A  |
| 11388 | Patient189B  | Patient235A  |
| 11388 | Patient196F  | Patient230F  |
| 11388 | Patient196F  | Patient261A  |
| 11388 | Patient222C  | Patient230F  |
| 11388 | Patient222C  | Patient261A  |
| 11389 | Patient022B  | Patient189A  |
| 11389 | Patient022B  | Patient189B  |
| 11389 | Patient034D  | Patient100A  |
| 11389 | Patient045B  | Patient246E  |
| 11389 | Patient045C  | Patient246E  |
| 11389 | Patient045D  | Patient213A  |
| 11389 | Patient086A  | Patient196F  |
| 11389 | Patient086B  | Patient196F  |
| 11389 | Patient094E  | Patient120A  |
| 11389 | Patient094E  | Patient195   |
| 11389 | Patient131   | Patient177   |
| 11389 | Patient150B  | Patient184   |
| 11389 | Patient183B  | Patient232D  |
| 11389 | Patient187   | Patient235A  |
| 11389 | Patient192A  | Patient232B  |
| 11389 | Patient192C  | Patient232B  |
| 11389 | Patient196C  | Patient220B  |
| 11389 | Patient220B  | Patient222D  |
| 11389 | Patient230A  | Patient263A  |
| 11390 | Patient023   | Patient258A1 |
| 11390 | Patient023   | Patient258D  |
| 11390 | Patient034D  | Patient263A  |
| 11390 | Patient045D  | Patient123D  |
| 11390 | Patient086E  | Patient196F  |
| 11390 | Patient093C  | Patient181B  |
| 11390 | Patient094D  | Patient235C  |
| 11390 | Patient100A  | Patient261B  |
| 11390 | Patient108B2 | Patient235E  |
| 11390 | Patient146   | Patient230D  |
| 11390 | Patient150B  | Patient263B  |
| 11390 | Patient161B  | Patient246E  |
| 11390 | Patient183E  | Patient232D  |
| 11390 | Patient220B  | Patient222E  |
| 11391 | Patient021A1 | Patient150B  |

|       |              |              |
|-------|--------------|--------------|
| 11391 | Patient045D  | Patient086C  |
| 11391 | Patient108B1 | Patient235E  |
| 11391 | Patient126C  | Patient232C  |
| 11391 | Patient196B  | Patient220B  |
| 11391 | Patient220B  | Patient222F  |
| 11391 | Patient230E  | Patient263A  |
| 11391 | Patient235A  | Patient236A  |
| 11392 | Patient023   | Patient121A  |
| 11392 | Patient034B  | Patient100A  |
| 11392 | Patient066F  | Patient196F  |
| 11392 | Patient066F  | Patient222C  |
| 11392 | Patient079C  | Patient258A1 |
| 11392 | Patient093C  | Patient181A  |
| 11392 | Patient094A  | Patient103E  |
| 11392 | Patient094E  | Patient235C  |
| 11392 | Patient108B1 | Patient192E  |
| 11392 | Patient108B2 | Patient192E  |
| 11392 | Patient120C  | Patient210   |
| 11392 | Patient126C  | Patient232A  |
| 11392 | Patient126C  | Patient232E  |
| 11392 | Patient127B  | Patient220B  |
| 11392 | Patient146   | Patient217J  |
| 11392 | Patient150B  | Patient246B  |
| 11392 | Patient157   | Patient258E  |
| 11393 | Patient023   | Patient258B  |
| 11393 | Patient023   | Patient258G  |
| 11393 | Patient066D  | Patient196F  |
| 11393 | Patient066D  | Patient222C  |
| 11393 | Patient066E  | Patient196F  |
| 11393 | Patient066E  | Patient222C  |
| 11393 | Patient079C  | Patient258D  |
| 11393 | Patient092H  | Patient232B  |
| 11393 | Patient093A  | Patient103D  |
| 11393 | Patient099B  | Patient235A  |
| 11393 | Patient100A  | Patient261D  |
| 11393 | Patient103E  | Patient210   |
| 11393 | Patient157   | Patient217J  |
| 11393 | Patient161B  | Patient246D  |
| 11393 | Patient192B  | Patient232B  |
| 11393 | Patient196E  | Patient220B  |
| 11393 | Patient196F  | Patient230B  |
| 11393 | Patient222B  | Patient235A  |
| 11393 | Patient222C  | Patient230B  |
| 11393 | Patient232B  | Patient235F  |
| 11394 | Patient022B  | Patient097A  |
| 11394 | Patient023   | Patient258F  |
| 11394 | Patient045D  | Patient150B  |
| 11394 | Patient079A1 | Patient258A1 |
| 11394 | Patient079A1 | Patient258D  |
| 11394 | Patient079C  | Patient258B  |

|       |              |              |
|-------|--------------|--------------|
| 11394 | Patient079C  | Patient258G  |
| 11394 | Patient092H  | Patient108B1 |
| 11394 | Patient092H  | Patient108B2 |
| 11394 | Patient093C  | Patient224B  |
| 11394 | Patient099A  | Patient235A  |
| 11394 | Patient150B  | Patient247A  |
| 11394 | Patient222A  | Patient235A  |
| 11394 | Patient235A  | Patient265   |
| 11395 | Patient022B  | Patient097E  |
| 11395 | Patient023   | Patient258A2 |
| 11395 | Patient026C  | Patient159   |
| 11395 | Patient079A2 | Patient258A1 |
| 11395 | Patient079A2 | Patient258D  |
| 11395 | Patient079C  | Patient258F  |
| 11395 | Patient093D  | Patient103D  |
| 11395 | Patient123A  | Patient196F  |
| 11395 | Patient201E  | Patient220B  |
| 11395 | Patient220B  | Patient232B  |
| 11395 | Patient230F  | Patient263A  |
| 11396 | Patient034B  | Patient263A  |
| 11396 | Patient079C  | Patient258A2 |
| 11396 | Patient086A  | Patient263A  |
| 11396 | Patient086B  | Patient263A  |
| 11396 | Patient092E  | Patient126E  |
| 11396 | Patient093E  | Patient103D  |
| 11396 | Patient094B  | Patient103D  |
| 11396 | Patient094D  | Patient235B  |
| 11396 | Patient123A  | Patient222C  |
| 11396 | Patient127A  | Patient220B  |
| 11396 | Patient146   | Patient261A  |
| 11396 | Patient150B  | Patient247B  |
| 11396 | Patient150B  | Patient247C  |
| 11396 | Patient196A  | Patient235A  |
| 11396 | Patient222F  | Patient235A  |
| 11396 | Patient261A  | Patient263A  |
| 11397 | Patient079A1 | Patient258B  |
| 11397 | Patient079A1 | Patient258G  |
| 11397 | Patient086E  | Patient263A  |
| 11397 | Patient092A  | Patient126E  |
| 11397 | Patient100A  | Patient123A  |
| 11397 | Patient126D  | Patient173A  |
| 11397 | Patient146   | Patient261E  |
| 11397 | Patient157   | Patient235F  |
| 11397 | Patient192C  | Patient232A  |
| 11397 | Patient192C  | Patient232C  |
| 11397 | Patient192E  | Patient232B  |
| 11397 | Patient196C  | Patient235A  |
| 11397 | Patient196F  | Patient261B  |
| 11397 | Patient213A  | Patient246A  |
| 11397 | Patient220B  | Patient232C  |

|       |              |              |
|-------|--------------|--------------|
| 11397 | Patient220B  | Patient232E  |
| 11397 | Patient222C  | Patient261B  |
| 11397 | Patient232B  | Patient235E  |
| 11398 | Patient079A1 | Patient258F  |
| 11398 | Patient079A2 | Patient258B  |
| 11398 | Patient079A2 | Patient258G  |
| 11398 | Patient094E  | Patient235B  |
| 11398 | Patient099C  | Patient235A  |
| 11398 | Patient126C  | Patient232D  |
| 11398 | Patient150B  | Patient246D  |
| 11398 | Patient150B  | Patient246E  |
| 11398 | Patient192A  | Patient232A  |
| 11398 | Patient192A  | Patient232C  |
| 11398 | Patient192A  | Patient232E  |
| 11398 | Patient192C  | Patient232E  |
| 11398 | Patient196D  | Patient220B  |
| 11398 | Patient201B  | Patient235A  |
| 11398 | Patient222E  | Patient235A  |
| 11398 | Patient232E  | Patient235F  |
| 11399 | Patient026D  | Patient146   |
| 11399 | Patient079A1 | Patient258A2 |
| 11399 | Patient079A2 | Patient258F  |
| 11399 | Patient093B  | Patient177   |
| 11399 | Patient093C  | Patient126A  |
| 11399 | Patient123C  | Patient196F  |
| 11399 | Patient126E  | Patient173A  |
| 11399 | Patient126E  | Patient192F  |
| 11399 | Patient145A  | Patient222C  |
| 11399 | Patient157   | Patient220B  |
| 11399 | Patient159   | Patient258E  |
| 11399 | Patient192B  | Patient232A  |
| 11399 | Patient192B  | Patient232C  |
| 11399 | Patient196B  | Patient235A  |
| 11399 | Patient201A  | Patient220B  |
| 11399 | Patient220B  | Patient232A  |
| 11399 | Patient230B  | Patient263A  |
| 11400 | Patient066F  | Patient263A  |
| 11400 | Patient079A2 | Patient258A2 |
| 11400 | Patient092G  | Patient196F  |
| 11400 | Patient093A  | Patient103E  |
| 11400 | Patient100A  | Patient123C  |
| 11400 | Patient108A  | Patient258A1 |
| 11400 | Patient108A  | Patient258F  |
| 11400 | Patient123C  | Patient222C  |
| 11400 | Patient145A  | Patient196F  |
| 11400 | Patient146   | Patient261C  |
| 11400 | Patient149B  | Patient220B  |
| 11400 | Patient192B  | Patient232E  |
| 11400 | Patient196E  | Patient235A  |
| 11400 | Patient220B  | Patient232D  |

|       |              |              |
|-------|--------------|--------------|
| 11400 | Patient222D  | Patient235A  |
| 11400 | Patient232C  | Patient235F  |
| 11401 | Patient022B  | Patient222B  |
| 11401 | Patient045D  | Patient086A  |
| 11401 | Patient045D  | Patient086B  |
| 11401 | Patient045D  | Patient161B  |
| 11401 | Patient066D  | Patient263A  |
| 11401 | Patient066E  | Patient263A  |
| 11401 | Patient092G  | Patient222C  |
| 11401 | Patient094C  | Patient103D  |
| 11401 | Patient108A  | Patient258B  |
| 11401 | Patient108A  | Patient258D  |
| 11401 | Patient108A  | Patient258G  |
| 11401 | Patient127B  | Patient235A  |
| 11401 | Patient145C  | Patient146   |
| 11401 | Patient146   | Patient161B  |
| 11401 | Patient146   | Patient230E  |
| 11401 | Patient157   | Patient235E  |
| 11401 | Patient213A  | Patient247A  |
| 11401 | Patient220B  | Patient263B  |
| 11402 | Patient022B  | Patient159   |
| 11402 | Patient045D  | Patient086E  |
| 11402 | Patient079B  | Patient258A1 |
| 11402 | Patient079B  | Patient258D  |
| 11402 | Patient092B  | Patient126E  |
| 11402 | Patient093C  | Patient103A  |
| 11402 | Patient093D  | Patient103E  |
| 11402 | Patient099D  | Patient235A  |
| 11402 | Patient100A  | Patient141C  |
| 11402 | Patient123B  | Patient196F  |
| 11402 | Patient232A  | Patient235F  |
| 11402 | Patient232E  | Patient235E  |
| 11403 | Patient026F  | Patient196F  |
| 11403 | Patient092H  | Patient232A  |
| 11403 | Patient092H  | Patient232C  |
| 11403 | Patient093E  | Patient103E  |
| 11403 | Patient094B  | Patient103E  |
| 11403 | Patient100A  | Patient123B  |
| 11403 | Patient108A  | Patient258A2 |
| 11403 | Patient123B  | Patient222C  |
| 11403 | Patient127A  | Patient235A  |
| 11403 | Patient184   | Patient220B  |
| 11403 | Patient192C  | Patient232D  |
| 11403 | Patient196F  | Patient261D  |
| 11403 | Patient213A  | Patient247B  |
| 11403 | Patient213A  | Patient247C  |
| 11403 | Patient222C  | Patient261D  |
| 11403 | Patient232D  | Patient235F  |
| 11404 | Patient021A2 | Patient092C  |
| 11404 | Patient022B  | Patient097C  |

|       |              |              |
|-------|--------------|--------------|
| 11404 | Patient092H  | Patient232E  |
| 11404 | Patient100A  | Patient141A  |
| 11404 | Patient100A  | Patient145A  |
| 11404 | Patient108B1 | Patient258A1 |
| 11404 | Patient108B1 | Patient258D  |
| 11404 | Patient108B2 | Patient258A1 |
| 11404 | Patient108B2 | Patient258D  |
| 11404 | Patient108G  | Patient258A1 |
| 11404 | Patient108G  | Patient258D  |
| 11404 | Patient109C  | Patient258A1 |
| 11404 | Patient123A  | Patient263A  |
| 11404 | Patient146   | Patient261B  |
| 11404 | Patient192A  | Patient232D  |
| 11404 | Patient232C  | Patient235E  |
| 11405 | Patient026E  | Patient146   |
| 11405 | Patient045D  | Patient220B  |
| 11405 | Patient079B  | Patient258B  |
| 11405 | Patient079B  | Patient258G  |
| 11405 | Patient092E  | Patient108B1 |
| 11405 | Patient092E  | Patient108B2 |
| 11405 | Patient092E  | Patient232B  |
| 11405 | Patient092G  | Patient100A  |
| 11405 | Patient092G  | Patient263A  |
| 11405 | Patient100A  | Patient141B  |
| 11405 | Patient108B1 | Patient192F  |
| 11405 | Patient108B2 | Patient192F  |
| 11405 | Patient108G  | Patient258F  |
| 11405 | Patient108H  | Patient258A1 |
| 11405 | Patient108H  | Patient258D  |
| 11405 | Patient109C  | Patient258D  |
| 11405 | Patient126E  | Patient235C  |
| 11405 | Patient146   | Patient230F  |
| 11405 | Patient192E  | Patient232C  |
| 11405 | Patient201E  | Patient235A  |
| 11405 | Patient261B  | Patient263A  |
| 11406 | Patient021A1 | Patient092C  |
| 11406 | Patient026F  | Patient222C  |
| 11406 | Patient079B  | Patient258F  |
| 11406 | Patient092A  | Patient108B1 |
| 11406 | Patient092A  | Patient108B2 |
| 11406 | Patient092A  | Patient232B  |
| 11406 | Patient093B  | Patient181B  |
| 11406 | Patient093C  | Patient213A  |
| 11406 | Patient108B2 | Patient258F  |
| 11406 | Patient108G  | Patient258B  |
| 11406 | Patient108G  | Patient258G  |
| 11406 | Patient109E  | Patient258A1 |
| 11406 | Patient126A  | Patient126D  |
| 11406 | Patient145A  | Patient263A  |
| 11406 | Patient149B  | Patient235A  |

|       |              |              |
|-------|--------------|--------------|
| 11406 | Patient159   | Patient217A  |
| 11406 | Patient159   | Patient217C  |
| 11406 | Patient159   | Patient217F  |
| 11406 | Patient192E  | Patient232A  |
| 11406 | Patient192E  | Patient232E  |
| 11406 | Patient232A  | Patient235E  |
| 11406 | Patient235A  | Patient263B  |
| 11407 | Patient022B  | Patient236B  |
| 11407 | Patient026B  | Patient196F  |
| 11407 | Patient026F  | Patient100A  |
| 11407 | Patient079B  | Patient258A2 |
| 11407 | Patient094D  | Patient177   |
| 11407 | Patient108B1 | Patient258B  |
| 11407 | Patient108B1 | Patient258G  |
| 11407 | Patient108B2 | Patient258B  |
| 11407 | Patient108B2 | Patient258G  |
| 11407 | Patient108H  | Patient258F  |
| 11407 | Patient109C  | Patient258B  |
| 11407 | Patient109C  | Patient258G  |
| 11407 | Patient109E  | Patient258D  |
| 11407 | Patient120A  | Patient126E  |
| 11407 | Patient146   | Patient261D  |
| 11407 | Patient159   | Patient217B  |
| 11407 | Patient159   | Patient217E  |
| 11407 | Patient159   | Patient217H  |
| 11407 | Patient192B  | Patient232D  |
| 11407 | Patient232D  | Patient235E  |
| 11408 | Patient023   | Patient164   |
| 11408 | Patient026C  | Patient196F  |
| 11408 | Patient032B  | Patient146   |
| 11408 | Patient093B  | Patient181A  |
| 11408 | Patient094C  | Patient103E  |
| 11408 | Patient108B1 | Patient258F  |
| 11408 | Patient108G  | Patient258A2 |
| 11408 | Patient108H  | Patient258B  |
| 11408 | Patient108H  | Patient258G  |
| 11408 | Patient123C  | Patient263A  |
| 11408 | Patient123D  | Patient196F  |
| 11408 | Patient146   | Patient230A  |
| 11408 | Patient159   | Patient217D  |
| 11408 | Patient159   | Patient217I  |
| 11409 | Patient026B  | Patient222C  |
| 11409 | Patient066D  | Patient146   |
| 11409 | Patient093B  | Patient224B  |
| 11409 | Patient093C  | Patient224A  |
| 11409 | Patient100A  | Patient123D  |
| 11409 | Patient108B1 | Patient258A2 |
| 11409 | Patient108B2 | Patient258A2 |
| 11409 | Patient109C  | Patient258A2 |
| 11409 | Patient109C  | Patient258F  |



|       |              |              |
|-------|--------------|--------------|
| 11409 | Patient109E  | Patient258B  |
| 11409 | Patient123D  | Patient222C  |
| 11409 | Patient126D  | Patient141A  |
| 11409 | Patient126D  | Patient141B  |
| 11409 | Patient126D  | Patient241   |
| 11409 | Patient222C  | Patient258E  |
| 11409 | Patient235A  | Patient246C  |
| 11410 | Patient026A  | Patient196F  |
| 11410 | Patient026C  | Patient222C  |
| 11410 | Patient026D  | Patient126D  |
| 11410 | Patient092H  | Patient232D  |
| 11410 | Patient094A  | Patient120D  |
| 11410 | Patient108B1 | Patient121A  |
| 11410 | Patient108B2 | Patient121A  |
| 11410 | Patient108H  | Patient258A2 |
| 11410 | Patient109A  | Patient258A1 |
| 11410 | Patient109D  | Patient258A1 |
| 11410 | Patient109D  | Patient258D  |
| 11410 | Patient109E  | Patient258G  |
| 11410 | Patient126D  | Patient141C  |
| 11410 | Patient201A  | Patient235A  |
| 11410 | Patient213A  | Patient247E  |
| 11411 | Patient022B  | Patient126E  |
| 11411 | Patient022B  | Patient213B  |
| 11411 | Patient092B  | Patient108B1 |
| 11411 | Patient092B  | Patient108B2 |
| 11411 | Patient092B  | Patient232B  |
| 11411 | Patient108B1 | Patient121B  |
| 11411 | Patient108B2 | Patient121B  |
| 11411 | Patient108F  | Patient258A1 |
| 11411 | Patient108F  | Patient258D  |
| 11411 | Patient109A  | Patient258D  |
| 11411 | Patient109B  | Patient258A1 |
| 11411 | Patient109B  | Patient258D  |
| 11411 | Patient109E  | Patient258A2 |
| 11411 | Patient109E  | Patient258F  |
| 11411 | Patient126D  | Patient177   |
| 11411 | Patient126D  | Patient230A  |
| 11411 | Patient126E  | Patient235B  |
| 11411 | Patient184   | Patient235A  |
| 11411 | Patient192D  | Patient247D  |
| 11411 | Patient192F  | Patient232B  |
| 11411 | Patient196F  | Patient258E  |
| 11411 | Patient261D  | Patient263A  |
| 11412 | Patient026A  | Patient222C  |
| 11412 | Patient026B  | Patient100A  |
| 11412 | Patient094E  | Patient177   |
| 11412 | Patient109D  | Patient258F  |
| 11412 | Patient123B  | Patient263A  |
| 11412 | Patient145A  | Patient146   |

|       |              |              |
|-------|--------------|--------------|
| 11412 | Patient192E  | Patient232D  |
| 11413 | Patient023   | Patient103A  |
| 11413 | Patient026F  | Patient263A  |
| 11413 | Patient053C  | Patient146   |
| 11413 | Patient094D  | Patient181B  |
| 11413 | Patient109A  | Patient258B  |
| 11413 | Patient109A  | Patient258F  |
| 11413 | Patient109A  | Patient258G  |
| 11413 | Patient109D  | Patient258B  |
| 11413 | Patient109D  | Patient258G  |
| 11413 | Patient235A  | Patient246B  |
| 11414 | Patient022B  | Patient097D  |
| 11414 | Patient026E  | Patient126D  |
| 11414 | Patient053A2 | Patient146   |
| 11414 | Patient053B  | Patient146   |
| 11414 | Patient092E  | Patient232A  |
| 11414 | Patient092E  | Patient232C  |
| 11414 | Patient092E  | Patient232E  |
| 11414 | Patient103A  | Patient131   |
| 11414 | Patient108F  | Patient258B  |
| 11414 | Patient108F  | Patient258G  |
| 11414 | Patient109B  | Patient258B  |
| 11414 | Patient109B  | Patient258G  |
| 11415 | Patient021A2 | Patient235A  |
| 11415 | Patient022B  | Patient222A  |
| 11415 | Patient022B  | Patient252D  |
| 11415 | Patient026C  | Patient247D  |
| 11415 | Patient032A  | Patient146   |
| 11415 | Patient066E  | Patient146   |
| 11415 | Patient066F  | Patient146   |
| 11415 | Patient092A  | Patient232A  |
| 11415 | Patient092A  | Patient232C  |
| 11415 | Patient092A  | Patient232E  |
| 11415 | Patient093B  | Patient126A  |
| 11415 | Patient094D  | Patient181A  |
| 11415 | Patient108D  | Patient258A1 |
| 11415 | Patient108D  | Patient258D  |
| 11415 | Patient108F  | Patient258F  |
| 11415 | Patient109A  | Patient258A2 |
| 11415 | Patient109B  | Patient258F  |
| 11415 | Patient109D  | Patient258A2 |
| 11415 | Patient141D  | Patient146   |
| 11415 | Patient146   | Patient183A  |
| 11415 | Patient173B  | Patient222C  |
| 11416 | Patient022B  | Patient222F  |
| 11416 | Patient093C  | Patient103B  |
| 11416 | Patient094D  | Patient224B  |
| 11416 | Patient108F  | Patient258A2 |
| 11416 | Patient109B  | Patient258A2 |
| 11416 | Patient126D  | Patient230D  |

|       |              |              |
|-------|--------------|--------------|
| 11416 | Patient159   | Patient217J  |
| 11416 | Patient173B  | Patient196F  |
| 11417 | Patient022B  | Patient236A  |
| 11417 | Patient026A  | Patient126D  |
| 11417 | Patient026B  | Patient263A  |
| 11417 | Patient093B  | Patient103A  |
| 11417 | Patient093C  | Patient103C  |
| 11417 | Patient108D  | Patient258F  |
| 11417 | Patient123D  | Patient263A  |
| 11417 | Patient141B  | Patient146   |
| 11417 | Patient141C  | Patient146   |
| 11417 | Patient159   | Patient213A  |
| 11417 | Patient192F  | Patient232A  |
| 11417 | Patient192F  | Patient232C  |
| 11417 | Patient196F  | Patient217A  |
| 11417 | Patient217A  | Patient222C  |
| 11418 | Patient021A1 | Patient235A  |
| 11418 | Patient022B  | Patient222E  |
| 11418 | Patient026C  | Patient263A  |
| 11418 | Patient045A  | Patient146   |
| 11418 | Patient094E  | Patient181B  |
| 11418 | Patient108D  | Patient258B  |
| 11418 | Patient108D  | Patient258G  |
| 11418 | Patient141A  | Patient146   |
| 11418 | Patient192F  | Patient232E  |
| 11418 | Patient235A  | Patient246D  |
| 11418 | Patient247D  | Patient258E  |
| 11418 | Patient258E  | Patient263A  |
| 11419 | Patient022B  | Patient265   |
| 11419 | Patient093A  | Patient120D  |
| 11419 | Patient108A  | Patient164   |
| 11419 | Patient196F  | Patient217C  |
| 11419 | Patient217C  | Patient222C  |
| 11419 | Patient232B  | Patient235C  |
| 11420 | Patient026A  | Patient263A  |
| 11420 | Patient092B  | Patient232A  |
| 11420 | Patient092B  | Patient232C  |
| 11420 | Patient092B  | Patient232E  |
| 11420 | Patient092E  | Patient232D  |
| 11420 | Patient093D  | Patient120D  |
| 11420 | Patient094E  | Patient181A  |
| 11420 | Patient108D  | Patient258A2 |
| 11420 | Patient109C  | Patient164   |
| 11420 | Patient146   | Patient173B  |
| 11420 | Patient196F  | Patient217B  |
| 11420 | Patient196F  | Patient217E  |
| 11420 | Patient196F  | Patient217F  |
| 11420 | Patient196F  | Patient217H  |
| 11420 | Patient217B  | Patient222C  |
| 11420 | Patient217E  | Patient222C  |

|       |              |             |
|-------|--------------|-------------|
| 11420 | Patient217F  | Patient222C |
| 11420 | Patient217H  | Patient222C |
| 11421 | Patient021A2 | Patient235F |
| 11421 | Patient022B  | Patient097B |
| 11421 | Patient022B  | Patient196C |
| 11421 | Patient034A  | Patient146  |
| 11421 | Patient045C  | Patient146  |
| 11421 | Patient092A  | Patient232D |
| 11421 | Patient093B  | Patient213A |
| 11421 | Patient093E  | Patient120D |
| 11421 | Patient094B  | Patient120D |
| 11421 | Patient094D  | Patient126A |
| 11421 | Patient094E  | Patient224B |
| 11421 | Patient126C  | Patient196F |
| 11421 | Patient126C  | Patient222C |
| 11421 | Patient196F  | Patient217D |
| 11421 | Patient217D  | Patient222C |
| 11421 | Patient235A  | Patient246E |
| 11421 | Patient235F  | Patient247D |
| 11422 | Patient021A1 | Patient235F |
| 11422 | Patient022B  | Patient196A |
| 11422 | Patient092C  | Patient159  |
| 11422 | Patient094A  | Patient120B |
| 11422 | Patient097A  | Patient177  |
| 11422 | Patient097E  | Patient177  |
| 11422 | Patient108B1 | Patient164  |
| 11422 | Patient108B2 | Patient164  |
| 11422 | Patient126D  | Patient164  |
| 11422 | Patient126D  | Patient230E |
| 11422 | Patient196F  | Patient217I |
| 11422 | Patient217I  | Patient222C |
| 11423 | Patient022B  | Patient079C |
| 11423 | Patient034B  | Patient146  |
| 11423 | Patient092C  | Patient157  |
| 11423 | Patient108G  | Patient164  |
| 11423 | Patient164   | Patient252B |
| 11423 | Patient173B  | Patient263A |
| 11423 | Patient192F  | Patient232D |
| 11424 | Patient022B  | Patient201B |
| 11424 | Patient023   | Patient258E |
| 11424 | Patient034D  | Patient146  |
| 11424 | Patient034E  | Patient146  |
| 11424 | Patient045B  | Patient146  |
| 11424 | Patient093B  | Patient224A |
| 11424 | Patient094D  | Patient103A |
| 11424 | Patient108H  | Patient164  |
| 11424 | Patient109E  | Patient164  |
| 11424 | Patient164   | Patient252A |
| 11424 | Patient173A  | Patient232B |
| 11424 | Patient177   | Patient213B |

|       |              |              |
|-------|--------------|--------------|
| 11424 | Patient232B  | Patient235B  |
| 11424 | Patient232E  | Patient235C  |
| 11425 | Patient021A2 | Patient235E  |
| 11425 | Patient022B  | Patient196B  |
| 11425 | Patient022B  | Patient196E  |
| 11425 | Patient022B  | Patient220A  |
| 11425 | Patient094A  | Patient120C  |
| 11425 | Patient126D  | Patient230B  |
| 11425 | Patient217A  | Patient263A  |
| 11425 | Patient235E  | Patient247D  |
| 11426 | Patient021A1 | Patient235E  |
| 11426 | Patient022B  | Patient079A1 |
| 11426 | Patient022B  | Patient079A2 |
| 11426 | Patient034C  | Patient146   |
| 11426 | Patient094E  | Patient126A  |
| 11426 | Patient157   | Patient235C  |
| 11426 | Patient164   | Patient252F  |
| 11426 | Patient232C  | Patient235C  |
| 11427 | Patient022B  | Patient108A  |
| 11427 | Patient092B  | Patient232D  |
| 11427 | Patient094C  | Patient120D  |
| 11427 | Patient109D  | Patient164   |
| 11427 | Patient126D  | Patient230F  |
| 11427 | Patient126D  | Patient242   |
| 11427 | Patient146   | Patient230B  |
| 11427 | Patient217C  | Patient263A  |
| 11428 | Patient022B  | Patient108B2 |
| 11428 | Patient022B  | Patient222D  |
| 11428 | Patient192D  | Patient213B  |
| 11428 | Patient192D  | Patient252D  |
| 11428 | Patient217B  | Patient263A  |
| 11428 | Patient217E  | Patient263A  |
| 11428 | Patient217F  | Patient263A  |
| 11428 | Patient217H  | Patient263A  |
| 11428 | Patient232A  | Patient235C  |
| 11429 | Patient022B  | Patient108B1 |
| 11429 | Patient022B  | Patient108G  |
| 11429 | Patient022B  | Patient218A  |
| 11429 | Patient094E  | Patient103A  |
| 11429 | Patient104B  | Patient177   |
| 11429 | Patient108F  | Patient164   |
| 11429 | Patient126C  | Patient263A  |
| 11429 | Patient126E  | Patient195   |
| 11429 | Patient131   | Patient235A  |
| 11429 | Patient159   | Patient235F  |
| 11429 | Patient177   | Patient252D  |
| 11429 | Patient196F  | Patient217J  |
| 11429 | Patient217D  | Patient263A  |
| 11429 | Patient217J  | Patient222C  |
| 11429 | Patient232D  | Patient235C  |

|       |              |              |
|-------|--------------|--------------|
| 11430 | Patient026A  | Patient100A  |
| 11430 | Patient094D  | Patient213A  |
| 11430 | Patient108B1 | Patient192D  |
| 11430 | Patient109A  | Patient164   |
| 11430 | Patient109B  | Patient164   |
| 11430 | Patient192D  | Patient196F  |
| 11430 | Patient192D  | Patient222C  |
| 11430 | Patient217I  | Patient263A  |
| 11430 | Patient232E  | Patient235B  |
| 11431 | Patient022B  | Patient109C  |
| 11431 | Patient022B  | Patient187   |
| 11431 | Patient026F  | Patient126D  |
| 11431 | Patient093B  | Patient103B  |
| 11431 | Patient094D  | Patient224A  |
| 11431 | Patient108B2 | Patient192D  |
| 11431 | Patient146   | Patient183D  |
| 11431 | Patient177   | Patient236B  |
| 11432 | Patient022B  | Patient201E  |
| 11432 | Patient022B  | Patient246B  |
| 11432 | Patient094E  | Patient213A  |
| 11432 | Patient104B  | Patient192D  |
| 11432 | Patient157   | Patient235B  |
| 11432 | Patient173A  | Patient232A  |
| 11432 | Patient173A  | Patient232C  |
| 11432 | Patient232C  | Patient235B  |
| 11433 | Patient022B  | Patient108H  |
| 11433 | Patient022B  | Patient109E  |
| 11433 | Patient022B  | Patient149B  |
| 11433 | Patient022B  | Patient246C  |
| 11433 | Patient026C  | Patient108B1 |
| 11433 | Patient026C  | Patient108B2 |
| 11433 | Patient093B  | Patient103C  |
| 11433 | Patient097C  | Patient177   |
| 11433 | Patient100A  | Patient121A  |
| 11433 | Patient104A  | Patient177   |
| 11433 | Patient126C  | Patient146   |
| 11433 | Patient159   | Patient235E  |
| 11433 | Patient173A  | Patient232E  |
| 11434 | Patient022B  | Patient099E  |
| 11434 | Patient022B  | Patient201A  |
| 11434 | Patient022B  | Patient218B  |
| 11434 | Patient108D  | Patient164   |
| 11434 | Patient120A  | Patient232B  |
| 11434 | Patient126D  | Patient235C  |
| 11434 | Patient232A  | Patient235B  |
| 11435 | Patient022B  | Patient109D  |
| 11435 | Patient022B  | Patient196D  |
| 11435 | Patient022B  | Patient263B  |
| 11435 | Patient026B  | Patient126D  |
| 11435 | Patient097D  | Patient177   |

|       |              |             |
|-------|--------------|-------------|
| 11435 | Patient100A  | Patient192D |
| 11435 | Patient232D  | Patient235B |
| 11436 | Patient022B  | Patient109B |
| 11436 | Patient026B  | Patient146  |
| 11436 | Patient094E  | Patient224A |
| 11436 | Patient104A  | Patient192D |
| 11436 | Patient123A  | Patient146  |
| 11436 | Patient123B  | Patient146  |
| 11436 | Patient123C  | Patient146  |
| 11436 | Patient146   | Patient183C |
| 11437 | Patient022B  | Patient079B |
| 11437 | Patient022B  | Patient246E |
| 11437 | Patient023   | Patient192D |
| 11437 | Patient026A  | Patient146  |
| 11437 | Patient103A  | Patient126D |
| 11437 | Patient103B  | Patient126D |
| 11437 | Patient108B1 | Patient258E |
| 11437 | Patient108B2 | Patient258E |
| 11437 | Patient126D  | Patient224A |
| 11437 | Patient146   | Patient183E |
| 11437 | Patient217A  | Patient247D |
| 11437 | Patient217C  | Patient247D |
| 11437 | Patient217J  | Patient263A |
| 11438 | Patient022B  | Patient109A |
| 11438 | Patient026C  | Patient213B |
| 11438 | Patient094D  | Patient103B |
| 11438 | Patient126E  | Patient177  |
| 11438 | Patient173A  | Patient232D |
| 11438 | Patient177   | Patient220A |
| 11438 | Patient177   | Patient222B |
| 11438 | Patient192D  | Patient263A |
| 11438 | Patient217B  | Patient247D |
| 11438 | Patient217E  | Patient247D |
| 11438 | Patient217F  | Patient247D |
| 11438 | Patient217H  | Patient247D |
| 11439 | Patient022B  | Patient246D |
| 11439 | Patient026F  | Patient146  |
| 11439 | Patient099E  | Patient177  |
| 11439 | Patient103C  | Patient126D |
| 11439 | Patient213B  | Patient258E |
| 11439 | Patient217D  | Patient247D |
| 11439 | Patient217I  | Patient247D |
| 11440 | Patient023   | Patient026C |
| 11440 | Patient026C  | Patient104B |
| 11440 | Patient066D  | Patient126D |
| 11440 | Patient066F  | Patient126D |
| 11440 | Patient079C  | Patient177  |
| 11440 | Patient086C  | Patient157  |
| 11440 | Patient094D  | Patient103C |
| 11440 | Patient177   | Patient196D |

|       |              |             |
|-------|--------------|-------------|
| 11441 | Patient022B  | Patient108D |
| 11441 | Patient066E  | Patient126D |
| 11441 | Patient093A  | Patient120B |
| 11441 | Patient100A  | Patient121B |
| 11441 | Patient123D  | Patient146  |
| 11441 | Patient146   | Patient183B |
| 11441 | Patient189E  | Patient192D |
| 11441 | Patient192D  | Patient220A |
| 11442 | Patient079A1 | Patient177  |
| 11442 | Patient079A2 | Patient177  |
| 11442 | Patient093D  | Patient120B |
| 11442 | Patient126D  | Patient235B |
| 11442 | Patient177   | Patient236A |
| 11442 | Patient189A  | Patient192D |
| 11442 | Patient192D  | Patient218A |
| 11443 | Patient021A2 | Patient217A |
| 11443 | Patient074C  | Patient094A |
| 11443 | Patient093E  | Patient120B |
| 11443 | Patient094B  | Patient120B |
| 11443 | Patient094E  | Patient103B |
| 11443 | Patient108A  | Patient177  |
| 11443 | Patient120A  | Patient232C |
| 11443 | Patient177   | Patient222F |
| 11443 | Patient177   | Patient265  |
| 11444 | Patient026C  | Patient104A |
| 11444 | Patient026C  | Patient252D |
| 11444 | Patient074B  | Patient094A |
| 11444 | Patient086C  | Patient247D |
| 11444 | Patient093A  | Patient120C |
| 11444 | Patient120A  | Patient232A |
| 11444 | Patient120A  | Patient232E |
| 11444 | Patient177   | Patient196C |
| 11444 | Patient177   | Patient218A |
| 11444 | Patient189B  | Patient192D |
| 11444 | Patient195   | Patient232B |
| 11445 | Patient021A1 | Patient217A |
| 11445 | Patient021A2 | Patient217C |
| 11445 | Patient022B  | Patient099B |
| 11445 | Patient074A  | Patient094A |
| 11445 | Patient074D  | Patient094A |
| 11445 | Patient086C  | Patient159  |
| 11445 | Patient093D  | Patient120C |
| 11445 | Patient094E  | Patient103C |
| 11445 | Patient097B  | Patient177  |
| 11445 | Patient100A  | Patient220B |
| 11445 | Patient104B  | Patient258E |
| 11445 | Patient126E  | Patient181B |
| 11445 | Patient177   | Patient196A |
| 11445 | Patient177   | Patient252A |
| 11445 | Patient192D  | Patient236B |



|       |              |              |
|-------|--------------|--------------|
| 11446 | Patient021A2 | Patient217B  |
| 11446 | Patient021A2 | Patient217E  |
| 11446 | Patient021A2 | Patient217F  |
| 11446 | Patient021A2 | Patient217H  |
| 11446 | Patient093E  | Patient120C  |
| 11446 | Patient094B  | Patient120C  |
| 11446 | Patient177   | Patient222A  |
| 11446 | Patient177   | Patient222E  |
| 11446 | Patient192D  | Patient218B  |
| 11447 | Patient021A1 | Patient217C  |
| 11447 | Patient021A2 | Patient053C  |
| 11447 | Patient021A2 | Patient217D  |
| 11447 | Patient021A2 | Patient217I  |
| 11447 | Patient022B  | Patient099A  |
| 11447 | Patient022B  | Patient108F  |
| 11447 | Patient022B  | Patient127A  |
| 11447 | Patient022B  | Patient127B  |
| 11447 | Patient045D  | Patient192A  |
| 11447 | Patient053C  | Patient157   |
| 11447 | Patient099E  | Patient192D  |
| 11447 | Patient126E  | Patient181A  |
| 11447 | Patient177   | Patient196B  |
| 11447 | Patient177   | Patient196E  |
| 11447 | Patient177   | Patient218B  |
| 11447 | Patient217J  | Patient247D  |
| 11448 | Patient021A1 | Patient217B  |
| 11448 | Patient021A1 | Patient217E  |
| 11448 | Patient021A1 | Patient217F  |
| 11448 | Patient021A1 | Patient217H  |
| 11448 | Patient053A2 | Patient157   |
| 11448 | Patient053B  | Patient157   |
| 11448 | Patient074E  | Patient094A  |
| 11448 | Patient094C  | Patient120B  |
| 11448 | Patient109C  | Patient177   |
| 11448 | Patient252D  | Patient258E  |
| 11449 | Patient021A1 | Patient053C  |
| 11449 | Patient021A1 | Patient217D  |
| 11449 | Patient021A1 | Patient217I  |
| 11449 | Patient021A2 | Patient053A2 |
| 11449 | Patient021A2 | Patient053B  |
| 11449 | Patient022B  | Patient099C  |
| 11449 | Patient045D  | Patient192C  |
| 11449 | Patient092C  | Patient247D  |
| 11449 | Patient104A  | Patient258E  |
| 11449 | Patient108G  | Patient177   |
| 11449 | Patient120A  | Patient232D  |
| 11449 | Patient126E  | Patient224B  |
| 11449 | Patient131   | Patient173B  |
| 11449 | Patient177   | Patient187   |
| 11449 | Patient177   | Patient201B  |

|       |              |              |
|-------|--------------|--------------|
| 11449 | Patient177   | Patient252B  |
| 11450 | Patient081C  | Patient097A  |
| 11450 | Patient086A  | Patient159   |
| 11450 | Patient086B  | Patient159   |
| 11450 | Patient108B1 | Patient177   |
| 11450 | Patient108B2 | Patient177   |
| 11450 | Patient108H  | Patient177   |
| 11450 | Patient195   | Patient232E  |
| 11450 | Patient213B  | Patient217A  |
| 11451 | Patient021A1 | Patient053A2 |
| 11451 | Patient021A1 | Patient053B  |
| 11451 | Patient026C  | Patient220A  |
| 11451 | Patient031   | Patient146   |
| 11451 | Patient079B  | Patient177   |
| 11451 | Patient081C  | Patient097E  |
| 11451 | Patient086A  | Patient157   |
| 11451 | Patient086B  | Patient157   |
| 11451 | Patient086E  | Patient159   |
| 11451 | Patient094C  | Patient120C  |
| 11451 | Patient109E  | Patient177   |
| 11451 | Patient146   | Patient235A  |
| 11451 | Patient195   | Patient232C  |
| 11452 | Patient022B  | Patient184   |
| 11452 | Patient053C  | Patient159   |
| 11452 | Patient074C  | Patient093A  |
| 11452 | Patient081C  | Patient131   |
| 11452 | Patient086E  | Patient157   |
| 11452 | Patient099B  | Patient177   |
| 11452 | Patient177   | Patient222D  |
| 11452 | Patient195   | Patient232A  |
| 11452 | Patient235C  | Patient247D  |
| 11453 | Patient022B  | Patient232B  |
| 11453 | Patient053A2 | Patient159   |
| 11453 | Patient053B  | Patient159   |
| 11453 | Patient074B  | Patient093A  |
| 11453 | Patient074C  | Patient093D  |
| 11453 | Patient081C  | Patient252A  |
| 11453 | Patient109D  | Patient177   |
| 11453 | Patient126A  | Patient126E  |
| 11453 | Patient187   | Patient192D  |
| 11453 | Patient192D  | Patient222B  |
| 11453 | Patient213B  | Patient217B  |
| 11453 | Patient213B  | Patient217C  |
| 11453 | Patient213B  | Patient217F  |
| 11453 | Patient213B  | Patient217H  |
| 11453 | Patient220A  | Patient258E  |
| 11454 | Patient021A2 | Patient022B  |
| 11454 | Patient022B  | Patient099D  |
| 11454 | Patient026C  | Patient099E  |
| 11454 | Patient045D  | Patient192B  |

|       |              |             |
|-------|--------------|-------------|
| 11454 | Patient074A  | Patient093A |
| 11454 | Patient074B  | Patient093D |
| 11454 | Patient074C  | Patient093E |
| 11454 | Patient074C  | Patient094B |
| 11454 | Patient074D  | Patient093A |
| 11454 | Patient086A  | Patient247D |
| 11454 | Patient086B  | Patient247D |
| 11454 | Patient093C  | Patient103D |
| 11454 | Patient099A  | Patient177  |
| 11454 | Patient177   | Patient201E |
| 11454 | Patient177   | Patient252F |
| 11454 | Patient195   | Patient232D |
| 11454 | Patient213B  | Patient217D |
| 11454 | Patient213B  | Patient217E |
| 11454 | Patient213B  | Patient217I |
| 11455 | Patient021A2 | Patient217J |
| 11455 | Patient022B  | Patient232C |
| 11455 | Patient026C  | Patient218A |
| 11455 | Patient074A  | Patient093D |
| 11455 | Patient074B  | Patient093E |
| 11455 | Patient074B  | Patient094B |
| 11455 | Patient074D  | Patient093D |
| 11455 | Patient086E  | Patient247D |
| 11455 | Patient097A  | Patient150C |
| 11455 | Patient097E  | Patient150C |
| 11455 | Patient097E  | Patient161B |
| 11455 | Patient104B  | Patient217A |
| 11455 | Patient146   | Patient192A |
| 11455 | Patient149B  | Patient177  |
| 11456 | Patient022B  | Patient232A |
| 11456 | Patient045D  | Patient121A |
| 11456 | Patient074A  | Patient093E |
| 11456 | Patient074A  | Patient094B |
| 11456 | Patient074D  | Patient093E |
| 11456 | Patient074D  | Patient094B |
| 11456 | Patient081C  | Patient097D |
| 11456 | Patient081C  | Patient252B |
| 11456 | Patient081D  | Patient097A |
| 11456 | Patient099C  | Patient177  |
| 11456 | Patient109A  | Patient177  |
| 11456 | Patient177   | Patient232B |
| 11456 | Patient177   | Patient246C |
| 11456 | Patient192D  | Patient236A |
| 11456 | Patient235B  | Patient247D |
| 11457 | Patient021A1 | Patient217J |
| 11457 | Patient026C  | Patient236B |
| 11457 | Patient074E  | Patient093A |
| 11457 | Patient081D  | Patient097E |
| 11457 | Patient099E  | Patient258E |
| 11457 | Patient104B  | Patient217C |

|       |              |             |
|-------|--------------|-------------|
| 11457 | Patient109B  | Patient177  |
| 11457 | Patient131   | Patient141A |
| 11457 | Patient131   | Patient141C |
| 11457 | Patient177   | Patient201A |
| 11458 | Patient021A1 | Patient022B |
| 11458 | Patient021A2 | Patient092D |
| 11458 | Patient022B  | Patient232E |
| 11458 | Patient026C  | Patient218B |
| 11458 | Patient045D  | Patient192E |
| 11458 | Patient074E  | Patient093D |
| 11458 | Patient081D  | Patient131  |
| 11458 | Patient086C  | Patient213B |
| 11458 | Patient097A  | Patient161B |
| 11458 | Patient103A  | Patient126E |
| 11458 | Patient104B  | Patient217B |
| 11458 | Patient104B  | Patient217E |
| 11458 | Patient104B  | Patient217F |
| 11458 | Patient104B  | Patient217H |
| 11458 | Patient131   | Patient141B |
| 11458 | Patient177   | Patient263B |
| 11458 | Patient192A  | Patient196F |
| 11458 | Patient192C  | Patient196F |
| 11458 | Patient192D  | Patient222F |
| 11458 | Patient192D  | Patient265  |
| 11458 | Patient217A  | Patient252D |
| 11458 | Patient217C  | Patient252D |
| 11458 | Patient236B  | Patient258E |
| 11459 | Patient021A2 | Patient086C |
| 11459 | Patient022B  | Patient023  |
| 11459 | Patient074C  | Patient094C |
| 11459 | Patient074E  | Patient093E |
| 11459 | Patient074E  | Patient094B |
| 11459 | Patient081D  | Patient252A |
| 11459 | Patient081E  | Patient131  |
| 11459 | Patient097A  | Patient164  |
| 11459 | Patient097D  | Patient150C |
| 11459 | Patient099D  | Patient177  |
| 11459 | Patient104A  | Patient217A |
| 11459 | Patient104B  | Patient217D |
| 11459 | Patient104B  | Patient217I |
| 11459 | Patient108F  | Patient177  |
| 11459 | Patient217B  | Patient252D |
| 11459 | Patient217E  | Patient252D |
| 11459 | Patient217F  | Patient252D |
| 11459 | Patient217H  | Patient252D |
| 11460 | Patient021A1 | Patient092D |
| 11460 | Patient045D  | Patient092H |
| 11460 | Patient045D  | Patient121B |
| 11460 | Patient074B  | Patient094C |
| 11460 | Patient081C  | Patient097B |

|       |              |             |
|-------|--------------|-------------|
| 11460 | Patient081C  | Patient097C |
| 11460 | Patient081C  | Patient252F |
| 11460 | Patient097A  | Patient150A |
| 11460 | Patient097E  | Patient164  |
| 11460 | Patient099B  | Patient192D |
| 11460 | Patient126E  | Patient213A |
| 11460 | Patient159   | Patient235C |
| 11460 | Patient192D  | Patient196A |
| 11460 | Patient192D  | Patient196C |
| 11460 | Patient192D  | Patient222A |
| 11460 | Patient217D  | Patient252D |
| 11460 | Patient217I  | Patient252D |
| 11461 | Patient026C  | Patient187  |
| 11461 | Patient026C  | Patient222B |
| 11461 | Patient074A  | Patient094C |
| 11461 | Patient086C  | Patient104B |
| 11461 | Patient093C  | Patient103E |
| 11461 | Patient097E  | Patient150A |
| 11461 | Patient099A  | Patient192D |
| 11461 | Patient104A  | Patient217C |
| 11461 | Patient108D  | Patient177  |
| 11461 | Patient177   | Patient246B |
| 11461 | Patient192B  | Patient196F |
| 11461 | Patient192C  | Patient222C |
| 11461 | Patient192D  | Patient222E |
| 11461 | Patient218A  | Patient258E |
| 11461 | Patient241   | Patient252A |
| 11462 | Patient021A1 | Patient086C |
| 11462 | Patient022B  | Patient232D |
| 11462 | Patient026D  | Patient131  |
| 11462 | Patient066D  | Patient100A |
| 11462 | Patient074D  | Patient094C |
| 11462 | Patient081D  | Patient097D |
| 11462 | Patient081D  | Patient252B |
| 11462 | Patient092G  | Patient146  |
| 11462 | Patient092H  | Patient146  |
| 11462 | Patient104A  | Patient217B |
| 11462 | Patient104A  | Patient217E |
| 11462 | Patient104A  | Patient217F |
| 11462 | Patient104A  | Patient217H |
| 11462 | Patient127A  | Patient177  |
| 11462 | Patient146   | Patient176  |
| 11462 | Patient192A  | Patient222C |
| 11462 | Patient192D  | Patient196B |
| 11462 | Patient192D  | Patient196E |
| 11463 | Patient023   | Patient217A |
| 11463 | Patient066F  | Patient100A |
| 11463 | Patient081B  | Patient131  |
| 11463 | Patient081F  | Patient131  |
| 11463 | Patient092C  | Patient213B |

|       |              |             |
|-------|--------------|-------------|
| 11463 | Patient097B  | Patient150C |
| 11463 | Patient099C  | Patient192D |
| 11463 | Patient100A  | Patient235C |
| 11463 | Patient104A  | Patient217D |
| 11463 | Patient104A  | Patient217I |
| 11463 | Patient126E  | Patient224A |
| 11463 | Patient131   | Patient230A |
| 11463 | Patient146   | Patient192C |
| 11463 | Patient159   | Patient235B |
| 11463 | Patient189E  | Patient217A |
| 11463 | Patient192D  | Patient201B |
| 11463 | Patient213B  | Patient217J |
| 11463 | Patient217A  | Patient220A |
| 11463 | Patient222B  | Patient258E |
| 11464 | Patient023   | Patient103D |
| 11464 | Patient092A  | Patient146  |
| 11464 | Patient097B  | Patient161B |
| 11464 | Patient097C  | Patient150C |
| 11464 | Patient097D  | Patient150A |
| 11464 | Patient097D  | Patient161B |
| 11464 | Patient127B  | Patient177  |
| 11464 | Patient177   | Patient189E |
| 11464 | Patient189A  | Patient217A |
| 11464 | Patient189E  | Patient258E |
| 11464 | Patient192B  | Patient222C |
| 11464 | Patient192D  | Patient222D |
| 11465 | Patient023   | Patient217C |
| 11465 | Patient074E  | Patient094C |
| 11465 | Patient086C  | Patient104A |
| 11465 | Patient092E  | Patient146  |
| 11465 | Patient097C  | Patient161B |
| 11465 | Patient100A  | Patient192A |
| 11465 | Patient100A  | Patient192C |
| 11465 | Patient103D  | Patient131  |
| 11465 | Patient108B1 | Patient217A |
| 11465 | Patient108B2 | Patient217A |
| 11465 | Patient189A  | Patient258E |
| 11465 | Patient189B  | Patient217A |
| 11465 | Patient213A  | Patient213B |
| 11465 | Patient217C  | Patient220A |
| 11465 | Patient218B  | Patient258E |
| 11466 | Patient023   | Patient217B |
| 11466 | Patient023   | Patient217E |
| 11466 | Patient023   | Patient217F |
| 11466 | Patient023   | Patient217H |
| 11466 | Patient023   | Patient217I |
| 11466 | Patient026C  | Patient236A |
| 11466 | Patient066E  | Patient100A |
| 11466 | Patient079C  | Patient164  |
| 11466 | Patient081A2 | Patient131  |

|       |              |             |
|-------|--------------|-------------|
| 11466 | Patient081D  | Patient097B |
| 11466 | Patient081D  | Patient097C |
| 11466 | Patient081D  | Patient252F |
| 11466 | Patient092B  | Patient146  |
| 11466 | Patient092C  | Patient104B |
| 11466 | Patient099E  | Patient217A |
| 11466 | Patient099E  | Patient217C |
| 11466 | Patient126D  | Patient181B |
| 11466 | Patient146   | Patient192B |
| 11466 | Patient177   | Patient189A |
| 11466 | Patient177   | Patient189B |
| 11466 | Patient177   | Patient232C |
| 11466 | Patient189B  | Patient258E |
| 11466 | Patient189E  | Patient217C |
| 11466 | Patient192D  | Patient201E |
| 11466 | Patient213A  | Patient252D |
| 11466 | Patient217B  | Patient220A |
| 11466 | Patient217E  | Patient220A |
| 11466 | Patient217F  | Patient220A |
| 11466 | Patient217H  | Patient220A |
| 11466 | Patient241   | Patient252B |
| 11467 | Patient021A2 | Patient026C |
| 11467 | Patient023   | Patient217D |
| 11467 | Patient026C  | Patient196C |
| 11467 | Patient026E  | Patient131  |
| 11467 | Patient099D  | Patient192D |
| 11467 | Patient099E  | Patient217B |
| 11467 | Patient099E  | Patient217E |
| 11467 | Patient099E  | Patient217F |
| 11467 | Patient099E  | Patient217H |
| 11467 | Patient100A  | Patient192B |
| 11467 | Patient104B  | Patient217J |
| 11467 | Patient108B1 | Patient217C |
| 11467 | Patient108B1 | Patient217F |
| 11467 | Patient108B2 | Patient217C |
| 11467 | Patient126D  | Patient181A |
| 11467 | Patient127A  | Patient192D |
| 11467 | Patient177   | Patient184  |
| 11467 | Patient177   | Patient232A |
| 11467 | Patient177   | Patient232E |
| 11467 | Patient177   | Patient246D |
| 11467 | Patient177   | Patient246E |
| 11467 | Patient189A  | Patient217C |
| 11467 | Patient189E  | Patient217B |
| 11467 | Patient189E  | Patient217E |
| 11467 | Patient189E  | Patient217F |
| 11467 | Patient189E  | Patient217H |
| 11467 | Patient192C  | Patient263A |
| 11467 | Patient213A  | Patient236B |
| 11467 | Patient217D  | Patient220A |

|       |              |             |
|-------|--------------|-------------|
| 11467 | Patient217I  | Patient220A |
| 11468 | Patient026C  | Patient099B |
| 11468 | Patient097B  | Patient150A |
| 11468 | Patient099E  | Patient217D |
| 11468 | Patient099E  | Patient217I |
| 11468 | Patient104B  | Patient213A |
| 11468 | Patient108B1 | Patient217B |
| 11468 | Patient108B1 | Patient217E |
| 11468 | Patient108B1 | Patient217H |
| 11468 | Patient108B1 | Patient217I |
| 11468 | Patient108B2 | Patient217B |
| 11468 | Patient108B2 | Patient217E |
| 11468 | Patient108B2 | Patient217F |
| 11468 | Patient108B2 | Patient217H |
| 11468 | Patient108B2 | Patient217I |
| 11468 | Patient127B  | Patient192D |
| 11468 | Patient131   | Patient230D |
| 11468 | Patient187   | Patient258E |
| 11468 | Patient189A  | Patient217B |
| 11468 | Patient189A  | Patient217E |
| 11468 | Patient189A  | Patient217F |
| 11468 | Patient189A  | Patient217H |
| 11468 | Patient189B  | Patient217C |
| 11468 | Patient189E  | Patient217D |
| 11468 | Patient192A  | Patient263A |
| 11468 | Patient217J  | Patient252D |
| 11468 | Patient236A  | Patient258E |
| 11469 | Patient021A2 | Patient192D |
| 11469 | Patient026C  | Patient099C |
| 11469 | Patient026C  | Patient196A |
| 11469 | Patient045D  | Patient192F |
| 11469 | Patient092C  | Patient104A |
| 11469 | Patient093B  | Patient103D |
| 11469 | Patient097C  | Patient150A |
| 11469 | Patient108B1 | Patient217D |
| 11469 | Patient108B2 | Patient217D |
| 11469 | Patient181B  | Patient232B |
| 11469 | Patient189A  | Patient217D |
| 11469 | Patient189B  | Patient217B |
| 11469 | Patient189B  | Patient217E |
| 11469 | Patient189B  | Patient217F |
| 11469 | Patient189B  | Patient217H |
| 11469 | Patient189E  | Patient217I |
| 11469 | Patient217A  | Patient218A |
| 11469 | Patient217A  | Patient236B |
| 11470 | Patient021A1 | Patient026C |
| 11470 | Patient026C  | Patient099A |
| 11470 | Patient026C  | Patient222F |
| 11470 | Patient079A1 | Patient164  |
| 11470 | Patient079A2 | Patient164  |



|       |              |             |
|-------|--------------|-------------|
| 11470 | Patient086B  | Patient213B |
| 11470 | Patient092C  | Patient252D |
| 11470 | Patient097A  | Patient150B |
| 11470 | Patient097C  | Patient164  |
| 11470 | Patient097D  | Patient164  |
| 11470 | Patient097E  | Patient150B |
| 11470 | Patient099B  | Patient258E |
| 11470 | Patient131   | Patient230E |
| 11470 | Patient149B  | Patient192D |
| 11470 | Patient189A  | Patient217I |
| 11470 | Patient189B  | Patient217D |
| 11470 | Patient192D  | Patient201A |
| 11470 | Patient192E  | Patient196F |
| 11470 | Patient192E  | Patient222C |
| 11470 | Patient217C  | Patient218A |
| 11470 | Patient217F  | Patient218A |
| 11470 | Patient224B  | Patient232B |
| 11471 | Patient021A1 | Patient192D |
| 11471 | Patient023   | Patient103E |
| 11471 | Patient026C  | Patient196B |
| 11471 | Patient026C  | Patient196E |
| 11471 | Patient026C  | Patient222A |
| 11471 | Patient026C  | Patient222D |
| 11471 | Patient026C  | Patient222E |
| 11471 | Patient026C  | Patient265  |
| 11471 | Patient081A1 | Patient131  |
| 11471 | Patient086A  | Patient213B |
| 11471 | Patient086E  | Patient213B |
| 11471 | Patient099A  | Patient258E |
| 11471 | Patient099C  | Patient258E |
| 11471 | Patient100A  | Patient235B |
| 11471 | Patient104A  | Patient217J |
| 11471 | Patient181A  | Patient232B |
| 11471 | Patient189B  | Patient217I |
| 11471 | Patient192B  | Patient263A |
| 11471 | Patient192D  | Patient196D |
| 11471 | Patient217A  | Patient218B |
| 11471 | Patient217B  | Patient218A |
| 11471 | Patient217C  | Patient236B |
| 11471 | Patient217E  | Patient218A |
| 11471 | Patient217H  | Patient218A |
| 11471 | Patient241   | Patient252F |
| 11472 | Patient021A2 | Patient086A |
| 11472 | Patient021A2 | Patient086B |
| 11472 | Patient026C  | Patient201B |
| 11472 | Patient045D  | Patient092A |
| 11472 | Patient097B  | Patient164  |
| 11472 | Patient103B  | Patient126E |
| 11472 | Patient103E  | Patient131  |
| 11472 | Patient104A  | Patient213A |

|       |              |             |
|-------|--------------|-------------|
| 11472 | Patient192D  | Patient247E |
| 11472 | Patient217B  | Patient236B |
| 11472 | Patient217D  | Patient218A |
| 11472 | Patient217E  | Patient236B |
| 11472 | Patient217F  | Patient236B |
| 11472 | Patient217H  | Patient236B |
| 11472 | Patient217I  | Patient218A |
| 11472 | Patient222A  | Patient258E |
| 11472 | Patient222F  | Patient258E |
| 11473 | Patient021A2 | Patient086E |
| 11473 | Patient026C  | Patient099D |
| 11473 | Patient045D  | Patient092E |
| 11473 | Patient053C  | Patient247D |
| 11473 | Patient086C  | Patient252D |
| 11473 | Patient100A  | Patient192E |
| 11473 | Patient177   | Patient232D |
| 11473 | Patient192D  | Patient263B |
| 11473 | Patient213A  | Patient220A |
| 11473 | Patient217C  | Patient218B |
| 11473 | Patient217D  | Patient236B |
| 11473 | Patient217F  | Patient218B |
| 11473 | Patient217I  | Patient236B |
| 11473 | Patient222E  | Patient258E |
| 11473 | Patient258E  | Patient265  |
| 11474 | Patient021A2 | Patient032B |
| 11474 | Patient021A2 | Patient258E |
| 11474 | Patient053A2 | Patient247D |
| 11474 | Patient053B  | Patient247D |
| 11474 | Patient086A  | Patient104B |
| 11474 | Patient086B  | Patient104B |
| 11474 | Patient094D  | Patient103D |
| 11474 | Patient097D  | Patient150B |
| 11474 | Patient097E  | Patient241  |
| 11474 | Patient103C  | Patient126E |
| 11474 | Patient121A  | Patient157  |
| 11474 | Patient187   | Patient217A |
| 11474 | Patient187   | Patient217F |
| 11474 | Patient189E  | Patient213A |
| 11474 | Patient196A  | Patient258E |
| 11474 | Patient196C  | Patient258E |
| 11474 | Patient217B  | Patient218B |
| 11474 | Patient217E  | Patient218B |
| 11474 | Patient217H  | Patient218B |
| 11475 | Patient021A1 | Patient086A |
| 11475 | Patient021A1 | Patient086B |
| 11475 | Patient023   | Patient217J |
| 11475 | Patient026C  | Patient189E |
| 11475 | Patient026C  | Patient201E |
| 11475 | Patient081E  | Patient100A |
| 11475 | Patient086E  | Patient104B |

|       |              |             |
|-------|--------------|-------------|
| 11475 | Patient092D  | Patient157  |
| 11475 | Patient099D  | Patient258E |
| 11475 | Patient121B  | Patient157  |
| 11475 | Patient187   | Patient217C |
| 11475 | Patient217D  | Patient218B |
| 11475 | Patient217I  | Patient218B |
| 11475 | Patient217J  | Patient220A |
| 11475 | Patient222D  | Patient258E |
| 11475 | Patient235F  | Patient252D |
| 11476 | Patient021A1 | Patient032B |
| 11476 | Patient021A1 | Patient086E |
| 11476 | Patient021A1 | Patient258E |
| 11476 | Patient022B  | Patient146  |
| 11476 | Patient026C  | Patient189A |
| 11476 | Patient086C  | Patient099E |
| 11476 | Patient086C  | Patient220A |
| 11476 | Patient092C  | Patient220A |
| 11476 | Patient093B  | Patient103E |
| 11476 | Patient097A  | Patient241  |
| 11476 | Patient099E  | Patient217J |
| 11476 | Patient184   | Patient192D |
| 11476 | Patient187   | Patient217B |
| 11476 | Patient187   | Patient217H |
| 11476 | Patient189A  | Patient213A |
| 11476 | Patient189E  | Patient217J |
| 11476 | Patient196B  | Patient258E |
| 11476 | Patient196E  | Patient258E |
| 11476 | Patient213A  | Patient222B |
| 11476 | Patient217C  | Patient222B |
| 11477 | Patient026C  | Patient127A |
| 11477 | Patient026C  | Patient189B |
| 11477 | Patient079B  | Patient164  |
| 11477 | Patient099E  | Patient213A |
| 11477 | Patient108B1 | Patient217J |
| 11477 | Patient108B2 | Patient217J |
| 11477 | Patient131   | Patient230B |
| 11477 | Patient146   | Patient192F |
| 11477 | Patient181B  | Patient232A |
| 11477 | Patient181B  | Patient232C |
| 11477 | Patient181B  | Patient232E |
| 11477 | Patient187   | Patient217D |
| 11477 | Patient187   | Patient217E |
| 11477 | Patient187   | Patient217I |
| 11477 | Patient189A  | Patient217J |
| 11477 | Patient189B  | Patient213A |
| 11477 | Patient192E  | Patient263A |
| 11477 | Patient213A  | Patient236A |
| 11477 | Patient213B  | Patient235F |
| 11477 | Patient217B  | Patient222B |
| 11477 | Patient217E  | Patient222B |

|       |              |              |
|-------|--------------|--------------|
| 11477 | Patient217F  | Patient222B  |
| 11477 | Patient217H  | Patient222B  |
| 11478 | Patient026C  | Patient127B  |
| 11478 | Patient045D  | Patient092B  |
| 11478 | Patient081F  | Patient100A  |
| 11478 | Patient086A  | Patient104A  |
| 11478 | Patient086B  | Patient104A  |
| 11478 | Patient086C  | Patient236B  |
| 11478 | Patient092C  | Patient097E  |
| 11478 | Patient097B  | Patient150B  |
| 11478 | Patient126A  | Patient232B  |
| 11478 | Patient131   | Patient164   |
| 11478 | Patient131   | Patient230F  |
| 11478 | Patient189B  | Patient217J  |
| 11478 | Patient217A  | Patient222B  |
| 11478 | Patient217A  | Patient236A  |
| 11478 | Patient217D  | Patient222B  |
| 11478 | Patient217I  | Patient222B  |
| 11478 | Patient224B  | Patient232C  |
| 11479 | Patient021A2 | Patient141D  |
| 11479 | Patient026C  | Patient247E  |
| 11479 | Patient026D  | Patient097A  |
| 11479 | Patient026D  | Patient097E  |
| 11479 | Patient081B  | Patient100A  |
| 11479 | Patient086E  | Patient104A  |
| 11479 | Patient097C  | Patient150B  |
| 11479 | Patient099B  | Patient217A  |
| 11479 | Patient103A  | Patient108B1 |
| 11479 | Patient103A  | Patient108B2 |
| 11479 | Patient127A  | Patient258E  |
| 11479 | Patient146   | Patient181A  |
| 11479 | Patient181A  | Patient232A  |
| 11479 | Patient181A  | Patient232C  |
| 11479 | Patient195   | Patient222C  |
| 11479 | Patient201B  | Patient258E  |
| 11479 | Patient213A  | Patient218A  |
| 11479 | Patient213A  | Patient265   |
| 11479 | Patient213B  | Patient235E  |
| 11479 | Patient235E  | Patient252D  |
| 11480 | Patient026C  | Patient184   |
| 11480 | Patient026C  | Patient196D  |
| 11480 | Patient026C  | Patient201A  |
| 11480 | Patient086C  | Patient222B  |
| 11480 | Patient093C  | Patient120D  |
| 11480 | Patient099A  | Patient217A  |
| 11480 | Patient099C  | Patient217A  |
| 11480 | Patient121A  | Patient159   |
| 11480 | Patient127B  | Patient258E  |
| 11480 | Patient181A  | Patient232E  |
| 11480 | Patient192F  | Patient196F  |

|       |              |             |
|-------|--------------|-------------|
| 11480 | Patient195   | Patient196F |
| 11480 | Patient196D  | Patient213A |
| 11480 | Patient213A  | Patient222F |
| 11480 | Patient213A  | Patient232B |
| 11480 | Patient217C  | Patient236A |
| 11480 | Patient217J  | Patient218A |
| 11480 | Patient224B  | Patient232A |
| 11480 | Patient224B  | Patient232E |
| 11481 | Patient021A1 | Patient141D |
| 11481 | Patient026C  | Patient149B |
| 11481 | Patient092C  | Patient097A |
| 11481 | Patient094D  | Patient103E |
| 11481 | Patient094E  | Patient103D |
| 11481 | Patient097D  | Patient241  |
| 11481 | Patient099B  | Patient217C |
| 11481 | Patient100A  | Patient173B |
| 11481 | Patient103A  | Patient232B |
| 11481 | Patient121B  | Patient159  |
| 11481 | Patient146   | Patient181B |
| 11481 | Patient157   | Patient173B |
| 11481 | Patient192D  | Patient247A |
| 11481 | Patient196A  | Patient213A |
| 11481 | Patient217A  | Patient265  |
| 11481 | Patient217B  | Patient236A |
| 11481 | Patient217F  | Patient236A |
| 11481 | Patient217H  | Patient236A |
| 11481 | Patient217J  | Patient236B |
| 11482 | Patient086A  | Patient252D |
| 11482 | Patient086B  | Patient252D |
| 11482 | Patient086C  | Patient218A |
| 11482 | Patient092H  | Patient196F |
| 11482 | Patient099A  | Patient217C |
| 11482 | Patient099B  | Patient217B |
| 11482 | Patient099B  | Patient217E |
| 11482 | Patient099B  | Patient217F |
| 11482 | Patient099B  | Patient217H |
| 11482 | Patient099C  | Patient217C |
| 11482 | Patient120A  | Patient146  |
| 11482 | Patient146   | Patient192E |
| 11482 | Patient159   | Patient173B |
| 11482 | Patient196C  | Patient213A |
| 11482 | Patient201E  | Patient258E |
| 11482 | Patient217A  | Patient222F |
| 11482 | Patient217D  | Patient236A |
| 11482 | Patient217E  | Patient236A |
| 11482 | Patient217I  | Patient236A |
| 11482 | Patient235F  | Patient246A |
| 11482 | Patient247E  | Patient258E |
| 11483 | Patient021A2 | Patient032A |
| 11483 | Patient026C  | Patient246A |

|       |              |             |
|-------|--------------|-------------|
| 11483 | Patient026C  | Patient246C |
| 11483 | Patient026D  | Patient097D |
| 11483 | Patient079C  | Patient241  |
| 11483 | Patient081A2 | Patient100A |
| 11483 | Patient086E  | Patient252D |
| 11483 | Patient092C  | Patient252A |
| 11483 | Patient092H  | Patient222C |
| 11483 | Patient099A  | Patient217B |
| 11483 | Patient099A  | Patient217E |
| 11483 | Patient099A  | Patient217F |
| 11483 | Patient099A  | Patient217H |
| 11483 | Patient099B  | Patient217D |
| 11483 | Patient099B  | Patient217I |
| 11483 | Patient099C  | Patient217B |
| 11483 | Patient099C  | Patient217E |
| 11483 | Patient099C  | Patient217F |
| 11483 | Patient099C  | Patient217H |
| 11483 | Patient108B2 | Patient241  |
| 11483 | Patient149B  | Patient258E |
| 11483 | Patient192D  | Patient247B |
| 11483 | Patient192D  | Patient247C |
| 11483 | Patient192F  | Patient222C |
| 11483 | Patient196A  | Patient217A |
| 11483 | Patient196C  | Patient217A |
| 11483 | Patient213A  | Patient222A |
| 11483 | Patient217A  | Patient222A |
| 11483 | Patient217C  | Patient265  |
| 11483 | Patient217J  | Patient218B |
| 11483 | Patient242   | Patient252A |
| 11484 | Patient026C  | Patient263B |
| 11484 | Patient026E  | Patient097A |
| 11484 | Patient026E  | Patient097E |
| 11484 | Patient086C  | Patient218B |
| 11484 | Patient092H  | Patient100A |
| 11484 | Patient099A  | Patient217D |
| 11484 | Patient099A  | Patient217I |
| 11484 | Patient099C  | Patient217D |
| 11484 | Patient099C  | Patient217I |
| 11484 | Patient099D  | Patient217A |
| 11484 | Patient108B1 | Patient241  |
| 11484 | Patient146   | Patient177  |
| 11484 | Patient196B  | Patient213A |
| 11484 | Patient196C  | Patient217F |
| 11484 | Patient196E  | Patient213A |
| 11484 | Patient217A  | Patient222E |
| 11484 | Patient217B  | Patient265  |
| 11484 | Patient217C  | Patient222F |
| 11484 | Patient217E  | Patient265  |
| 11484 | Patient217F  | Patient265  |
| 11484 | Patient217H  | Patient265  |

|       |              |             |
|-------|--------------|-------------|
| 11485 | Patient021A1 | Patient032A |
| 11485 | Patient032B  | Patient157  |
| 11485 | Patient079A1 | Patient092C |
| 11485 | Patient079C  | Patient092C |
| 11485 | Patient081E  | Patient157  |
| 11485 | Patient086A  | Patient099E |
| 11485 | Patient086B  | Patient099E |
| 11485 | Patient086C  | Patient099B |
| 11485 | Patient092C  | Patient099E |
| 11485 | Patient097B  | Patient241  |
| 11485 | Patient100A  | Patient192F |
| 11485 | Patient126A  | Patient232C |
| 11485 | Patient141D  | Patient157  |
| 11485 | Patient181A  | Patient232D |
| 11485 | Patient181B  | Patient232D |
| 11485 | Patient187   | Patient217J |
| 11485 | Patient192D  | Patient246C |
| 11485 | Patient196A  | Patient217C |
| 11485 | Patient196B  | Patient217A |
| 11485 | Patient196C  | Patient217C |
| 11485 | Patient196D  | Patient258E |
| 11485 | Patient196E  | Patient217A |
| 11485 | Patient201B  | Patient217A |
| 11485 | Patient213A  | Patient218B |
| 11485 | Patient213A  | Patient222E |
| 11485 | Patient217B  | Patient222F |
| 11485 | Patient217C  | Patient222A |
| 11485 | Patient217D  | Patient265  |
| 11485 | Patient217E  | Patient222F |
| 11485 | Patient217F  | Patient222F |
| 11485 | Patient217H  | Patient222F |
| 11485 | Patient217I  | Patient265  |
| 11485 | Patient224A  | Patient232B |
| 11486 | Patient079A1 | Patient241  |
| 11486 | Patient079A2 | Patient092C |
| 11486 | Patient079A2 | Patient241  |
| 11486 | Patient086C  | Patient099A |
| 11486 | Patient086C  | Patient187  |
| 11486 | Patient086E  | Patient099E |
| 11486 | Patient092C  | Patient097B |
| 11486 | Patient092C  | Patient097D |
| 11486 | Patient092C  | Patient218A |
| 11486 | Patient092C  | Patient218B |
| 11486 | Patient097C  | Patient241  |
| 11486 | Patient099D  | Patient217C |
| 11486 | Patient126A  | Patient232A |
| 11486 | Patient126A  | Patient232E |
| 11486 | Patient184   | Patient258E |
| 11486 | Patient187   | Patient213A |
| 11486 | Patient192D  | Patient246A |

|       |              |             |
|-------|--------------|-------------|
| 11486 | Patient195   | Patient263A |
| 11486 | Patient196A  | Patient217B |
| 11486 | Patient196A  | Patient217E |
| 11486 | Patient196A  | Patient217F |
| 11486 | Patient196A  | Patient217H |
| 11486 | Patient196C  | Patient217B |
| 11486 | Patient196C  | Patient217E |
| 11486 | Patient196C  | Patient217H |
| 11486 | Patient201A  | Patient258E |
| 11486 | Patient201B  | Patient217C |
| 11486 | Patient217B  | Patient222A |
| 11486 | Patient217C  | Patient222E |
| 11486 | Patient217D  | Patient222F |
| 11486 | Patient217E  | Patient222A |
| 11486 | Patient217F  | Patient222A |
| 11486 | Patient217H  | Patient222A |
| 11486 | Patient217I  | Patient222F |
| 11486 | Patient217J  | Patient222B |
| 11486 | Patient224B  | Patient232D |
| 11486 | Patient235E  | Patient246A |
| 11486 | Patient235F  | Patient247E |
| 11486 | Patient258E  | Patient263B |
| 11487 | Patient021A2 | Patient034A |
| 11487 | Patient021A2 | Patient034C |
| 11487 | Patient081A1 | Patient100A |
| 11487 | Patient081F  | Patient157  |
| 11487 | Patient086A  | Patient222B |
| 11487 | Patient086B  | Patient222B |
| 11487 | Patient092C  | Patient109C |
| 11487 | Patient092C  | Patient236B |
| 11487 | Patient092H  | Patient263A |
| 11487 | Patient099D  | Patient217B |
| 11487 | Patient099D  | Patient217E |
| 11487 | Patient099D  | Patient217F |
| 11487 | Patient099D  | Patient217H |
| 11487 | Patient108A  | Patient241  |
| 11487 | Patient131   | Patient241  |
| 11487 | Patient196A  | Patient217D |
| 11487 | Patient196A  | Patient217I |
| 11487 | Patient196B  | Patient217C |
| 11487 | Patient196C  | Patient217D |
| 11487 | Patient196C  | Patient217I |
| 11487 | Patient196E  | Patient217C |
| 11487 | Patient201B  | Patient217B |
| 11487 | Patient201B  | Patient217E |
| 11487 | Patient201B  | Patient217F |
| 11487 | Patient201B  | Patient217H |
| 11487 | Patient217A  | Patient222D |
| 11487 | Patient217B  | Patient222E |
| 11487 | Patient217D  | Patient222A |



|       |              |             |
|-------|--------------|-------------|
| 11487 | Patient217E  | Patient222E |
| 11487 | Patient217F  | Patient222D |
| 11487 | Patient217F  | Patient222E |
| 11487 | Patient217H  | Patient222E |
| 11487 | Patient217I  | Patient222A |
| 11487 | Patient242   | Patient252B |
| 11488 | Patient021A1 | Patient034A |
| 11488 | Patient026C  | Patient246B |
| 11488 | Patient026D  | Patient097B |
| 11488 | Patient026D  | Patient097C |
| 11488 | Patient026E  | Patient097D |
| 11488 | Patient026F  | Patient131  |
| 11488 | Patient086C  | Patient099C |
| 11488 | Patient086C  | Patient189A |
| 11488 | Patient086C  | Patient189E |
| 11488 | Patient086C  | Patient236A |
| 11488 | Patient086C  | Patient265  |
| 11488 | Patient086E  | Patient222B |
| 11488 | Patient092C  | Patient252B |
| 11488 | Patient092D  | Patient159  |
| 11488 | Patient094E  | Patient103E |
| 11488 | Patient099D  | Patient217D |
| 11488 | Patient099D  | Patient217I |
| 11488 | Patient103D  | Patient126D |
| 11488 | Patient104B  | Patient235F |
| 11488 | Patient127A  | Patient217A |
| 11488 | Patient146   | Patient173A |
| 11488 | Patient196B  | Patient217B |
| 11488 | Patient196B  | Patient217E |
| 11488 | Patient196B  | Patient217F |
| 11488 | Patient196B  | Patient217H |
| 11488 | Patient196E  | Patient217B |
| 11488 | Patient196E  | Patient217E |
| 11488 | Patient196E  | Patient217F |
| 11488 | Patient201B  | Patient217D |
| 11488 | Patient217C  | Patient222D |
| 11488 | Patient217D  | Patient222E |
| 11488 | Patient217I  | Patient222E |
| 11488 | Patient220A  | Patient235F |
| 11489 | Patient021A1 | Patient034C |
| 11489 | Patient021A2 | Patient034E |
| 11489 | Patient023   | Patient235A |
| 11489 | Patient086A  | Patient220A |
| 11489 | Patient086A  | Patient236B |
| 11489 | Patient086B  | Patient220A |
| 11489 | Patient086B  | Patient236B |
| 11489 | Patient086C  | Patient196C |
| 11489 | Patient086C  | Patient222A |
| 11489 | Patient092C  | Patient097C |
| 11489 | Patient141D  | Patient159  |

|       |              |             |
|-------|--------------|-------------|
| 11489 | Patient192F  | Patient263A |
| 11489 | Patient196B  | Patient217D |
| 11489 | Patient196B  | Patient217I |
| 11489 | Patient196E  | Patient217D |
| 11489 | Patient196E  | Patient217H |
| 11489 | Patient196E  | Patient217I |
| 11489 | Patient196F  | Patient224B |
| 11489 | Patient201E  | Patient217A |
| 11489 | Patient217B  | Patient222D |
| 11489 | Patient217E  | Patient222D |
| 11489 | Patient217H  | Patient222D |
| 11490 | Patient021A2 | Patient261A |
| 11490 | Patient026C  | Patient247A |
| 11490 | Patient032B  | Patient159  |
| 11490 | Patient086C  | Patient189B |
| 11490 | Patient086C  | Patient196A |
| 11490 | Patient086C  | Patient222D |
| 11490 | Patient086C  | Patient222F |
| 11490 | Patient086E  | Patient220A |
| 11490 | Patient086E  | Patient236B |
| 11490 | Patient092C  | Patient108A |
| 11490 | Patient092C  | Patient108G |
| 11490 | Patient092C  | Patient108H |
| 11490 | Patient092C  | Patient252F |
| 11490 | Patient097A  | Patient235F |
| 11490 | Patient103A  | Patient232A |
| 11490 | Patient103A  | Patient232C |
| 11490 | Patient109C  | Patient241  |
| 11490 | Patient127A  | Patient217C |
| 11490 | Patient127A  | Patient217H |
| 11490 | Patient127B  | Patient217A |
| 11490 | Patient192D  | Patient246B |
| 11490 | Patient201B  | Patient213A |
| 11490 | Patient201B  | Patient217I |
| 11490 | Patient213A  | Patient232A |
| 11490 | Patient213A  | Patient232C |
| 11490 | Patient213A  | Patient232E |
| 11490 | Patient217D  | Patient222D |
| 11490 | Patient217I  | Patient222D |
| 11490 | Patient217J  | Patient236A |
| 11490 | Patient222C  | Patient224B |
| 11490 | Patient235E  | Patient247E |
| 11491 | Patient021A1 | Patient034E |
| 11491 | Patient021A2 | Patient034D |
| 11491 | Patient021A2 | Patient145C |
| 11491 | Patient026B  | Patient131  |
| 11491 | Patient079C  | Patient235F |
| 11491 | Patient081A2 | Patient157  |
| 11491 | Patient081B  | Patient157  |
| 11491 | Patient086C  | Patient222E |

|       |              |             |
|-------|--------------|-------------|
| 11491 | Patient092C  | Patient109E |
| 11491 | Patient092C  | Patient187  |
| 11491 | Patient097A  | Patient230D |
| 11491 | Patient097E  | Patient235F |
| 11491 | Patient099B  | Patient213A |
| 11491 | Patient099B  | Patient217J |
| 11491 | Patient103A  | Patient232E |
| 11491 | Patient104A  | Patient235F |
| 11491 | Patient127A  | Patient217B |
| 11491 | Patient127A  | Patient217E |
| 11491 | Patient127A  | Patient217F |
| 11491 | Patient196F  | Patient224A |
| 11491 | Patient201E  | Patient217C |
| 11491 | Patient218A  | Patient235F |
| 11491 | Patient222C  | Patient224A |
| 11491 | Patient235F  | Patient247A |
| 11492 | Patient021A1 | Patient261A |
| 11492 | Patient026A  | Patient131  |
| 11492 | Patient026C  | Patient247B |
| 11492 | Patient026C  | Patient247C |
| 11492 | Patient086A  | Patient218A |
| 11492 | Patient086B  | Patient218A |
| 11492 | Patient086C  | Patient196B |
| 11492 | Patient086C  | Patient196E |
| 11492 | Patient092C  | Patient109D |
| 11492 | Patient097E  | Patient230D |
| 11492 | Patient099A  | Patient217J |
| 11492 | Patient099C  | Patient217J |
| 11492 | Patient099E  | Patient235F |
| 11492 | Patient108G  | Patient241  |
| 11492 | Patient109D  | Patient241  |
| 11492 | Patient126A  | Patient232D |
| 11492 | Patient127A  | Patient217D |
| 11492 | Patient127A  | Patient217I |
| 11492 | Patient127B  | Patient217C |
| 11492 | Patient127B  | Patient217H |
| 11492 | Patient201E  | Patient217B |
| 11492 | Patient201E  | Patient217E |
| 11492 | Patient201E  | Patient217F |
| 11492 | Patient201E  | Patient217H |
| 11492 | Patient213A  | Patient222D |
| 11492 | Patient220A  | Patient235E |
| 11492 | Patient224A  | Patient232C |
| 11492 | Patient235F  | Patient247B |
| 11492 | Patient235F  | Patient247C |
| 11492 | Patient242   | Patient252F |
| 11493 | Patient021A1 | Patient034D |
| 11493 | Patient021A1 | Patient145C |
| 11493 | Patient026C  | Patient246D |
| 11493 | Patient026E  | Patient097B |

|       |              |             |
|-------|--------------|-------------|
| 11493 | Patient026E  | Patient097C |
| 11493 | Patient081E  | Patient159  |
| 11493 | Patient081F  | Patient159  |
| 11493 | Patient086C  | Patient099D |
| 11493 | Patient086E  | Patient218A |
| 11493 | Patient092C  | Patient099B |
| 11493 | Patient092C  | Patient222F |
| 11493 | Patient093C  | Patient120B |
| 11493 | Patient099A  | Patient213A |
| 11493 | Patient104B  | Patient235E |
| 11493 | Patient108H  | Patient241  |
| 11493 | Patient109E  | Patient241  |
| 11493 | Patient127B  | Patient217B |
| 11493 | Patient127B  | Patient217E |
| 11493 | Patient127B  | Patient217F |
| 11493 | Patient149B  | Patient213A |
| 11493 | Patient149B  | Patient217A |
| 11493 | Patient201A  | Patient217A |
| 11493 | Patient201E  | Patient217D |
| 11493 | Patient201E  | Patient217I |
| 11493 | Patient217J  | Patient265  |
| 11493 | Patient247A  | Patient258E |
| 11494 | Patient032A  | Patient157  |
| 11494 | Patient092A  | Patient196F |
| 11494 | Patient092C  | Patient189E |
| 11494 | Patient092E  | Patient100A |
| 11494 | Patient092E  | Patient196F |
| 11494 | Patient097A  | Patient235E |
| 11494 | Patient099C  | Patient213A |
| 11494 | Patient127B  | Patient217D |
| 11494 | Patient127B  | Patient217I |
| 11494 | Patient184   | Patient217A |
| 11494 | Patient196D  | Patient217A |
| 11494 | Patient196D  | Patient235F |
| 11494 | Patient201E  | Patient213A |
| 11494 | Patient213A  | Patient246C |
| 11494 | Patient217J  | Patient222F |
| 11494 | Patient218A  | Patient235E |
| 11494 | Patient224A  | Patient232A |
| 11495 | Patient021A2 | Patient034B |
| 11495 | Patient026C  | Patient246E |
| 11495 | Patient026D  | Patient252A |
| 11495 | Patient079A1 | Patient235F |
| 11495 | Patient079A2 | Patient235F |
| 11495 | Patient079C  | Patient235E |
| 11495 | Patient086C  | Patient097A |
| 11495 | Patient092A  | Patient222C |
| 11495 | Patient092C  | Patient099A |
| 11495 | Patient092C  | Patient099C |
| 11495 | Patient092C  | Patient189A |

|       |              |             |
|-------|--------------|-------------|
| 11495 | Patient092E  | Patient222C |
| 11495 | Patient093B  | Patient120D |
| 11495 | Patient097E  | Patient235E |
| 11495 | Patient097E  | Patient242  |
| 11495 | Patient103B  | Patient232B |
| 11495 | Patient103E  | Patient126D |
| 11495 | Patient149B  | Patient217C |
| 11495 | Patient181B  | Patient196F |
| 11495 | Patient196A  | Patient217J |
| 11495 | Patient196C  | Patient217J |
| 11495 | Patient201A  | Patient217C |
| 11495 | Patient217J  | Patient222A |
| 11495 | Patient224A  | Patient232E |
| 11495 | Patient235E  | Patient247A |
| 11495 | Patient235F  | Patient236B |
| 11495 | Patient247B  | Patient258E |
| 11495 | Patient247C  | Patient258E |
| 11496 | Patient023   | Patient241  |
| 11496 | Patient079B  | Patient092C |
| 11496 | Patient079B  | Patient241  |
| 11496 | Patient081A1 | Patient157  |
| 11496 | Patient092A  | Patient100A |
| 11496 | Patient092C  | Patient109A |
| 11496 | Patient092C  | Patient196A |
| 11496 | Patient092C  | Patient236A |
| 11496 | Patient092C  | Patient265  |
| 11496 | Patient097A  | Patient242  |
| 11496 | Patient097D  | Patient230D |
| 11496 | Patient097D  | Patient235F |
| 11496 | Patient099D  | Patient217J |
| 11496 | Patient099E  | Patient235E |
| 11496 | Patient103A  | Patient232D |
| 11496 | Patient104A  | Patient235E |
| 11496 | Patient126A  | Patient146  |
| 11496 | Patient131   | Patient150C |
| 11496 | Patient145C  | Patient157  |
| 11496 | Patient146   | Patient213A |
| 11496 | Patient146   | Patient235F |
| 11496 | Patient149B  | Patient217B |
| 11496 | Patient149B  | Patient217E |
| 11496 | Patient149B  | Patient217F |
| 11496 | Patient149B  | Patient217H |
| 11496 | Patient157   | Patient261A |
| 11496 | Patient184   | Patient217C |
| 11496 | Patient196D  | Patient217C |
| 11496 | Patient201A  | Patient217B |
| 11496 | Patient201A  | Patient217E |
| 11496 | Patient201A  | Patient217F |
| 11496 | Patient201A  | Patient217H |
| 11496 | Patient201B  | Patient217J |

|       |              |             |
|-------|--------------|-------------|
| 11496 | Patient213A  | Patient232D |
| 11496 | Patient217A  | Patient246A |
| 11496 | Patient217A  | Patient246C |
| 11496 | Patient217A  | Patient263B |
| 11496 | Patient217J  | Patient222E |
| 11496 | Patient235E  | Patient247B |
| 11496 | Patient235E  | Patient247C |
| 11497 | Patient021A1 | Patient034B |
| 11497 | Patient026D  | Patient252B |
| 11497 | Patient032A  | Patient159  |
| 11497 | Patient034A  | Patient157  |
| 11497 | Patient045D  | Patient103A |
| 11497 | Patient081B  | Patient159  |
| 11497 | Patient086A  | Patient218B |
| 11497 | Patient086B  | Patient218B |
| 11497 | Patient086C  | Patient127A |
| 11497 | Patient086C  | Patient127B |
| 11497 | Patient092C  | Patient108F |
| 11497 | Patient092C  | Patient189B |
| 11497 | Patient092C  | Patient196C |
| 11497 | Patient092C  | Patient222B |
| 11497 | Patient092C  | Patient222E |
| 11497 | Patient093C  | Patient120C |
| 11497 | Patient108A  | Patient235F |
| 11497 | Patient109B  | Patient241  |
| 11497 | Patient149B  | Patient217D |
| 11497 | Patient149B  | Patient217I |
| 11497 | Patient181B  | Patient222C |
| 11497 | Patient184   | Patient217B |
| 11497 | Patient184   | Patient217E |
| 11497 | Patient184   | Patient217F |
| 11497 | Patient184   | Patient217H |
| 11497 | Patient192D  | Patient246D |
| 11497 | Patient192D  | Patient246E |
| 11497 | Patient196B  | Patient217J |
| 11497 | Patient196D  | Patient217B |
| 11497 | Patient196D  | Patient217E |
| 11497 | Patient196D  | Patient217F |
| 11497 | Patient196D  | Patient217H |
| 11497 | Patient196E  | Patient217J |
| 11497 | Patient201A  | Patient217D |
| 11497 | Patient201A  | Patient217I |
| 11497 | Patient213A  | Patient246B |
| 11497 | Patient213A  | Patient263B |
| 11497 | Patient217A  | Patient247E |
| 11497 | Patient217C  | Patient247E |
| 11497 | Patient218B  | Patient235F |
| 11497 | Patient224B  | Patient263A |
| 11498 | Patient086A  | Patient099B |
| 11498 | Patient086A  | Patient187  |

|       |              |             |
|-------|--------------|-------------|
| 11498 | Patient086B  | Patient099B |
| 11498 | Patient086B  | Patient187  |
| 11498 | Patient086C  | Patient097E |
| 11498 | Patient086C  | Patient201B |
| 11498 | Patient086C  | Patient247E |
| 11498 | Patient086E  | Patient218B |
| 11498 | Patient092C  | Patient196B |
| 11498 | Patient092C  | Patient196E |
| 11498 | Patient092C  | Patient222A |
| 11498 | Patient103C  | Patient232B |
| 11498 | Patient108B2 | Patient235A |
| 11498 | Patient120A  | Patient126D |
| 11498 | Patient146   | Patient224A |
| 11498 | Patient146   | Patient235E |
| 11498 | Patient181A  | Patient196F |
| 11498 | Patient184   | Patient217D |
| 11498 | Patient184   | Patient217I |
| 11498 | Patient196D  | Patient217D |
| 11498 | Patient196D  | Patient217I |
| 11498 | Patient196D  | Patient235E |
| 11498 | Patient201A  | Patient213A |
| 11498 | Patient217B  | Patient247E |
| 11498 | Patient217C  | Patient246A |
| 11498 | Patient217C  | Patient246C |
| 11498 | Patient217C  | Patient263B |
| 11498 | Patient217E  | Patient247E |
| 11498 | Patient217F  | Patient247E |
| 11498 | Patient217H  | Patient247E |
| 11498 | Patient217J  | Patient222D |
| 11499 | Patient034E  | Patient157  |
| 11499 | Patient053C  | Patient104B |
| 11499 | Patient079A1 | Patient235E |
| 11499 | Patient079A2 | Patient235E |
| 11499 | Patient081A2 | Patient159  |
| 11499 | Patient086A  | Patient099A |
| 11499 | Patient086B  | Patient099A |
| 11499 | Patient086E  | Patient099B |
| 11499 | Patient086E  | Patient187  |
| 11499 | Patient092A  | Patient263A |
| 11499 | Patient092B  | Patient196F |
| 11499 | Patient092C  | Patient099D |
| 11499 | Patient092E  | Patient263A |
| 11499 | Patient097B  | Patient235F |
| 11499 | Patient099D  | Patient213A |
| 11499 | Patient103B  | Patient196F |
| 11499 | Patient108B1 | Patient235A |
| 11499 | Patient109A  | Patient241  |
| 11499 | Patient127A  | Patient213A |
| 11499 | Patient181A  | Patient222C |
| 11499 | Patient217B  | Patient246A |

|       |              |             |
|-------|--------------|-------------|
| 11499 | Patient217B  | Patient246C |
| 11499 | Patient217B  | Patient263B |
| 11499 | Patient217D  | Patient247E |
| 11499 | Patient217E  | Patient246A |
| 11499 | Patient217E  | Patient246C |
| 11499 | Patient217E  | Patient263B |
| 11499 | Patient217F  | Patient246A |
| 11499 | Patient217F  | Patient246C |
| 11499 | Patient217F  | Patient263B |
| 11499 | Patient217H  | Patient246A |
| 11499 | Patient217H  | Patient246C |
| 11499 | Patient217H  | Patient263B |
| 11499 | Patient217I  | Patient247E |
| 11499 | Patient224A  | Patient263A |
| 11499 | Patient235E  | Patient236B |
| 11500 | Patient021A2 | Patient123A |
| 11500 | Patient023   | Patient081C |
| 11500 | Patient026E  | Patient252A |
| 11500 | Patient034A  | Patient159  |
| 11500 | Patient053A2 | Patient104B |
| 11500 | Patient053B  | Patient104B |
| 11500 | Patient086A  | Patient236A |
| 11500 | Patient086B  | Patient236A |
| 11500 | Patient086C  | Patient196D |
| 11500 | Patient086C  | Patient201E |
| 11500 | Patient086E  | Patient099A |
| 11500 | Patient092B  | Patient100A |
| 11500 | Patient092B  | Patient222C |
| 11500 | Patient092C  | Patient108D |
| 11500 | Patient092C  | Patient109B |
| 11500 | Patient092C  | Patient127A |
| 11500 | Patient097D  | Patient235E |
| 11500 | Patient103B  | Patient222C |
| 11500 | Patient108F  | Patient241  |
| 11500 | Patient120A  | Patient157  |
| 11500 | Patient127A  | Patient217J |
| 11500 | Patient187   | Patient235F |
| 11500 | Patient217A  | Patient246B |
| 11500 | Patient217D  | Patient246A |
| 11500 | Patient217D  | Patient246C |
| 11500 | Patient217D  | Patient263B |
| 11500 | Patient217I  | Patient246A |
| 11500 | Patient217I  | Patient246C |
| 11500 | Patient217I  | Patient263B |
| 11500 | Patient218B  | Patient235E |
| 11500 | Patient222B  | Patient235F |
| 11500 | Patient246A  | Patient258E |
| 11500 | Patient246C  | Patient258E |
| 11501 | Patient021A2 | Patient261B |
| 11501 | Patient074B  | Patient146  |



|       |              |             |
|-------|--------------|-------------|
| 11501 | Patient079B  | Patient235F |
| 11501 | Patient086A  | Patient099C |
| 11501 | Patient086A  | Patient189A |
| 11501 | Patient086A  | Patient189E |
| 11501 | Patient086A  | Patient222A |
| 11501 | Patient086A  | Patient265  |
| 11501 | Patient086B  | Patient099C |
| 11501 | Patient086B  | Patient189A |
| 11501 | Patient086B  | Patient189E |
| 11501 | Patient086B  | Patient222A |
| 11501 | Patient086B  | Patient265  |
| 11501 | Patient086C  | Patient149B |
| 11501 | Patient086E  | Patient236A |
| 11501 | Patient092C  | Patient222D |
| 11501 | Patient097B  | Patient230D |
| 11501 | Patient103A  | Patient196F |
| 11501 | Patient103C  | Patient196F |
| 11501 | Patient108A  | Patient235E |
| 11501 | Patient109C  | Patient235F |
| 11501 | Patient127B  | Patient213A |
| 11501 | Patient131   | Patient150A |
| 11501 | Patient131   | Patient161B |
| 11501 | Patient201E  | Patient217J |
| 11502 | Patient021A1 | Patient123A |
| 11502 | Patient026D  | Patient252F |
| 11502 | Patient026E  | Patient252B |
| 11502 | Patient034C  | Patient157  |
| 11502 | Patient034D  | Patient157  |
| 11502 | Patient034E  | Patient159  |
| 11502 | Patient086C  | Patient097B |
| 11502 | Patient086C  | Patient097C |
| 11502 | Patient086C  | Patient097D |
| 11502 | Patient086E  | Patient099C |
| 11502 | Patient086E  | Patient189A |
| 11502 | Patient086E  | Patient189E |
| 11502 | Patient086E  | Patient222A |
| 11502 | Patient086E  | Patient265  |
| 11502 | Patient092C  | Patient127B |
| 11502 | Patient092C  | Patient201B |
| 11502 | Patient094D  | Patient120D |
| 11502 | Patient097C  | Patient230D |
| 11502 | Patient097C  | Patient235F |
| 11502 | Patient103A  | Patient222C |
| 11502 | Patient103C  | Patient222C |
| 11502 | Patient108D  | Patient241  |
| 11502 | Patient108G  | Patient235F |
| 11502 | Patient121A  | Patient204  |
| 11502 | Patient126C  | Patient131  |
| 11502 | Patient127B  | Patient217J |
| 11502 | Patient146   | Patient235C |

|       |              |             |
|-------|--------------|-------------|
| 11502 | Patient157   | Patient230A |
| 11502 | Patient159   | Patient261A |
| 11502 | Patient217C  | Patient246B |
| 11502 | Patient224A  | Patient232D |
| 11503 | Patient021A1 | Patient261B |
| 11503 | Patient021A2 | Patient123C |
| 11503 | Patient053C  | Patient104A |
| 11503 | Patient079C  | Patient242  |
| 11503 | Patient086A  | Patient189B |
| 11503 | Patient086B  | Patient189B |
| 11503 | Patient086C  | Patient201A |
| 11503 | Patient086C  | Patient263B |
| 11503 | Patient092C  | Patient201E |
| 11503 | Patient092D  | Patient247D |
| 11503 | Patient097B  | Patient235E |
| 11503 | Patient099B  | Patient235F |
| 11503 | Patient109E  | Patient235F |
| 11503 | Patient126A  | Patient196F |
| 11503 | Patient217B  | Patient246B |
| 11503 | Patient217E  | Patient246B |
| 11503 | Patient217F  | Patient246B |
| 11503 | Patient217H  | Patient246B |
| 11503 | Patient222A  | Patient235F |
| 11503 | Patient235F  | Patient252A |
| 11504 | Patient053A2 | Patient104A |
| 11504 | Patient053B  | Patient104A |
| 11504 | Patient053C  | Patient252D |
| 11504 | Patient081A1 | Patient159  |
| 11504 | Patient081C  | Patient108A |
| 11504 | Patient086A  | Patient196A |
| 11504 | Patient086A  | Patient222D |
| 11504 | Patient086A  | Patient222E |
| 11504 | Patient086A  | Patient222F |
| 11504 | Patient086B  | Patient196A |
| 11504 | Patient086B  | Patient222D |
| 11504 | Patient086B  | Patient222F |
| 11504 | Patient086C  | Patient184  |
| 11504 | Patient086E  | Patient189B |
| 11504 | Patient092B  | Patient263A |
| 11504 | Patient097D  | Patient242  |
| 11504 | Patient099A  | Patient235F |
| 11504 | Patient103B  | Patient232A |
| 11504 | Patient103B  | Patient232C |
| 11504 | Patient108B2 | Patient242  |
| 11504 | Patient108H  | Patient235F |
| 11504 | Patient109D  | Patient235F |
| 11504 | Patient126A  | Patient222C |
| 11504 | Patient150C  | Patient252A |
| 11504 | Patient157   | Patient173A |
| 11504 | Patient157   | Patient261B |

|       |              |             |
|-------|--------------|-------------|
| 11504 | Patient187   | Patient235E |
| 11504 | Patient217D  | Patient246B |
| 11504 | Patient217I  | Patient246B |
| 11504 | Patient222B  | Patient235E |
| 11504 | Patient235C  | Patient252D |
| 11505 | Patient021A1 | Patient123C |
| 11505 | Patient021A2 | Patient123B |
| 11505 | Patient021A2 | Patient261D |
| 11505 | Patient034C  | Patient159  |
| 11505 | Patient034D  | Patient159  |
| 11505 | Patient053A2 | Patient252D |
| 11505 | Patient053B  | Patient252D |
| 11505 | Patient079B  | Patient235E |
| 11505 | Patient086A  | Patient097A |
| 11505 | Patient086A  | Patient196C |
| 11505 | Patient086B  | Patient097A |
| 11505 | Patient086B  | Patient196C |
| 11505 | Patient086E  | Patient196A |
| 11505 | Patient086E  | Patient222D |
| 11505 | Patient086E  | Patient222F |
| 11505 | Patient092C  | Patient149B |
| 11505 | Patient097B  | Patient242  |
| 11505 | Patient103B  | Patient232E |
| 11505 | Patient108B1 | Patient242  |
| 11505 | Patient109C  | Patient235E |
| 11505 | Patient141C  | Patient157  |
| 11505 | Patient149B  | Patient217J |
| 11505 | Patient181B  | Patient263A |
| 11505 | Patient201A  | Patient217J |
| 11505 | Patient213A  | Patient246D |
| 11505 | Patient213A  | Patient246E |
| 11505 | Patient235F  | Patient236A |
| 11505 | Patient235F  | Patient252B |
| 11506 | Patient023   | Patient081D |
| 11506 | Patient034B  | Patient157  |
| 11506 | Patient053C  | Patient097A |
| 11506 | Patient074D  | Patient146  |
| 11506 | Patient079A1 | Patient242  |
| 11506 | Patient079A2 | Patient242  |
| 11506 | Patient086A  | Patient099D |
| 11506 | Patient086A  | Patient196B |
| 11506 | Patient086A  | Patient196E |
| 11506 | Patient086A  | Patient201B |
| 11506 | Patient086A  | Patient247E |
| 11506 | Patient086B  | Patient196B |
| 11506 | Patient086B  | Patient196E |
| 11506 | Patient086B  | Patient201B |
| 11506 | Patient086B  | Patient222E |
| 11506 | Patient086B  | Patient247E |
| 11506 | Patient086E  | Patient097A |

|       |              |             |
|-------|--------------|-------------|
| 11506 | Patient086E  | Patient196C |
| 11506 | Patient086E  | Patient222E |
| 11506 | Patient097C  | Patient235E |
| 11506 | Patient097C  | Patient242  |
| 11506 | Patient103C  | Patient232A |
| 11506 | Patient103C  | Patient232C |
| 11506 | Patient108G  | Patient235E |
| 11506 | Patient123A  | Patient157  |
| 11506 | Patient146   | Patient224B |
| 11506 | Patient146   | Patient235B |
| 11506 | Patient157   | Patient230E |
| 11506 | Patient159   | Patient230A |
| 11506 | Patient184   | Patient217J |
| 11506 | Patient196A  | Patient235F |
| 11506 | Patient196D  | Patient217J |
| 11506 | Patient213B  | Patient235C |
| 11506 | Patient217A  | Patient247A |
| 11506 | Patient246B  | Patient258E |
| 11507 | Patient021A1 | Patient123B |
| 11507 | Patient021A1 | Patient261D |
| 11507 | Patient026E  | Patient252F |
| 11507 | Patient053A2 | Patient097A |
| 11507 | Patient053B  | Patient097A |
| 11507 | Patient074A  | Patient146  |
| 11507 | Patient074C  | Patient146  |
| 11507 | Patient086B  | Patient099D |
| 11507 | Patient086E  | Patient196B |
| 11507 | Patient086E  | Patient196E |
| 11507 | Patient086E  | Patient201B |
| 11507 | Patient086E  | Patient247E |
| 11507 | Patient092C  | Patient196D |
| 11507 | Patient092C  | Patient201A |
| 11507 | Patient092C  | Patient263B |
| 11507 | Patient094E  | Patient120D |
| 11507 | Patient099B  | Patient235E |
| 11507 | Patient103C  | Patient232E |
| 11507 | Patient109E  | Patient235E |
| 11507 | Patient141B  | Patient157  |
| 11507 | Patient145C  | Patient159  |
| 11507 | Patient173B  | Patient247D |
| 11507 | Patient196C  | Patient235F |
| 11507 | Patient217A  | Patient246D |
| 11507 | Patient217J  | Patient247E |
| 11507 | Patient222A  | Patient235E |
| 11507 | Patient222F  | Patient235F |
| 11507 | Patient235E  | Patient252A |
| 11507 | Patient235F  | Patient265  |
| 11508 | Patient053C  | Patient097E |
| 11508 | Patient081E  | Patient189E |
| 11508 | Patient086C  | Patient247A |

|       |              |              |
|-------|--------------|--------------|
| 11508 | Patient086E  | Patient099D  |
| 11508 | Patient093B  | Patient120B  |
| 11508 | Patient099A  | Patient235E  |
| 11508 | Patient099C  | Patient235F  |
| 11508 | Patient100A  | Patient120A  |
| 11508 | Patient103C  | Patient146   |
| 11508 | Patient108A  | Patient242   |
| 11508 | Patient108H  | Patient235E  |
| 11508 | Patient109D  | Patient235E  |
| 11508 | Patient131   | Patient242   |
| 11508 | Patient141A  | Patient157   |
| 11508 | Patient150C  | Patient252B  |
| 11508 | Patient157   | Patient261D  |
| 11508 | Patient159   | Patient261B  |
| 11508 | Patient181A  | Patient263A  |
| 11508 | Patient217A  | Patient246E  |
| 11508 | Patient217A  | Patient247B  |
| 11508 | Patient217A  | Patient247C  |
| 11508 | Patient217C  | Patient246D  |
| 11508 | Patient217C  | Patient247A  |
| 11508 | Patient217J  | Patient246A  |
| 11508 | Patient217J  | Patient246C  |
| 11508 | Patient217J  | Patient263B  |
| 11508 | Patient235F  | Patient252F  |
| 11509 | Patient034B  | Patient159   |
| 11509 | Patient053A2 | Patient097E  |
| 11509 | Patient053B  | Patient097E  |
| 11509 | Patient081C  | Patient108B1 |
| 11509 | Patient081C  | Patient108B2 |
| 11509 | Patient081C  | Patient108G  |
| 11509 | Patient081C  | Patient109C  |
| 11509 | Patient081D  | Patient108A  |
| 11509 | Patient081E  | Patient189A  |
| 11509 | Patient103B  | Patient263A  |
| 11509 | Patient103D  | Patient126E  |
| 11509 | Patient109A  | Patient235F  |
| 11509 | Patient141C  | Patient159   |
| 11509 | Patient150A  | Patient252A  |
| 11509 | Patient184   | Patient213A  |
| 11509 | Patient196B  | Patient235F  |
| 11509 | Patient217B  | Patient246D  |
| 11509 | Patient217B  | Patient247A  |
| 11509 | Patient217E  | Patient246D  |
| 11509 | Patient217E  | Patient247A  |
| 11509 | Patient217F  | Patient246D  |
| 11509 | Patient217F  | Patient247A  |
| 11509 | Patient217H  | Patient246D  |
| 11509 | Patient217H  | Patient247A  |
| 11509 | Patient222E  | Patient235F  |
| 11509 | Patient235E  | Patient236A  |

|       |              |             |
|-------|--------------|-------------|
| 11509 | Patient235E  | Patient252B |
| 11510 | Patient021A2 | Patient145A |
| 11510 | Patient026D  | Patient108A |
| 11510 | Patient053C  | Patient220A |
| 11510 | Patient081E  | Patient189B |
| 11510 | Patient086A  | Patient127A |
| 11510 | Patient086A  | Patient127B |
| 11510 | Patient086B  | Patient127A |
| 11510 | Patient086B  | Patient127B |
| 11510 | Patient086C  | Patient247B |
| 11510 | Patient086E  | Patient127A |
| 11510 | Patient086E  | Patient127B |
| 11510 | Patient109B  | Patient235F |
| 11510 | Patient109C  | Patient242  |
| 11510 | Patient123C  | Patient157  |
| 11510 | Patient159   | Patient230E |
| 11510 | Patient196A  | Patient235E |
| 11510 | Patient196E  | Patient235F |
| 11510 | Patient201B  | Patient235F |
| 11510 | Patient217C  | Patient246E |
| 11510 | Patient217C  | Patient247B |
| 11510 | Patient217C  | Patient247C |
| 11510 | Patient217D  | Patient246D |
| 11510 | Patient217D  | Patient247A |
| 11510 | Patient217I  | Patient246D |
| 11510 | Patient217I  | Patient247A |
| 11510 | Patient235B  | Patient252D |
| 11510 | Patient246D  | Patient258E |
| 11511 | Patient021A2 | Patient123D |
| 11511 | Patient053A2 | Patient220A |
| 11511 | Patient053B  | Patient220A |
| 11511 | Patient053C  | Patient097D |
| 11511 | Patient079C  | Patient081C |
| 11511 | Patient079C  | Patient086C |
| 11511 | Patient081F  | Patient189E |
| 11511 | Patient086A  | Patient097E |
| 11511 | Patient086B  | Patient097E |
| 11511 | Patient092C  | Patient184  |
| 11511 | Patient092C  | Patient247E |
| 11511 | Patient103A  | Patient263A |
| 11511 | Patient103C  | Patient263A |
| 11511 | Patient123B  | Patient157  |
| 11511 | Patient131   | Patient150B |
| 11511 | Patient141B  | Patient159  |
| 11511 | Patient141D  | Patient247D |
| 11511 | Patient157   | Patient230F |
| 11511 | Patient196C  | Patient235E |
| 11511 | Patient217B  | Patient246E |
| 11511 | Patient217B  | Patient247B |
| 11511 | Patient217B  | Patient247C |

|       |              |             |
|-------|--------------|-------------|
| 11511 | Patient217E  | Patient246E |
| 11511 | Patient217E  | Patient247B |
| 11511 | Patient217E  | Patient247C |
| 11511 | Patient217F  | Patient246E |
| 11511 | Patient217F  | Patient247B |
| 11511 | Patient217F  | Patient247C |
| 11511 | Patient217H  | Patient246E |
| 11511 | Patient217H  | Patient247B |
| 11511 | Patient217H  | Patient247C |
| 11511 | Patient222D  | Patient235F |
| 11511 | Patient222F  | Patient235E |
| 11511 | Patient235C  | Patient246A |
| 11511 | Patient235E  | Patient265  |
| 11512 | Patient021A1 | Patient145A |
| 11512 | Patient053A2 | Patient097D |
| 11512 | Patient053B  | Patient097D |
| 11512 | Patient074C  | Patient093C |
| 11512 | Patient081C  | Patient108H |
| 11512 | Patient081C  | Patient109E |
| 11512 | Patient081F  | Patient189A |
| 11512 | Patient086A  | Patient097D |
| 11512 | Patient086B  | Patient097D |
| 11512 | Patient086C  | Patient247C |
| 11512 | Patient086E  | Patient097E |
| 11512 | Patient093B  | Patient120C |
| 11512 | Patient099C  | Patient235E |
| 11512 | Patient099D  | Patient235F |
| 11512 | Patient103B  | Patient232D |
| 11512 | Patient103C  | Patient232D |
| 11512 | Patient108F  | Patient235F |
| 11512 | Patient120A  | Patient247D |
| 11512 | Patient123A  | Patient159  |
| 11512 | Patient126A  | Patient263A |
| 11512 | Patient127B  | Patient235F |
| 11512 | Patient150C  | Patient252F |
| 11512 | Patient189E  | Patient235F |
| 11512 | Patient213B  | Patient235B |
| 11512 | Patient217D  | Patient246E |
| 11512 | Patient217D  | Patient247B |
| 11512 | Patient217D  | Patient247C |
| 11512 | Patient217I  | Patient246E |
| 11512 | Patient217I  | Patient247B |
| 11512 | Patient217I  | Patient247C |
| 11512 | Patient217J  | Patient246B |
| 11512 | Patient230D  | Patient252A |
| 11512 | Patient235E  | Patient252F |
| 11512 | Patient246E  | Patient258E |
| 11513 | Patient021A1 | Patient123D |
| 11513 | Patient032B  | Patient247D |
| 11513 | Patient066D  | Patient157  |

|       |              |             |
|-------|--------------|-------------|
| 11513 | Patient066F  | Patient157  |
| 11513 | Patient074B  | Patient093C |
| 11513 | Patient079A1 | Patient086C |
| 11513 | Patient081E  | Patient247D |
| 11513 | Patient081F  | Patient189B |
| 11513 | Patient086A  | Patient201E |
| 11513 | Patient086C  | Patient246A |
| 11513 | Patient086E  | Patient097D |
| 11513 | Patient108D  | Patient235F |
| 11513 | Patient108G  | Patient242  |
| 11513 | Patient109A  | Patient235E |
| 11513 | Patient109D  | Patient242  |
| 11513 | Patient109E  | Patient242  |
| 11513 | Patient121A  | Patient247D |
| 11513 | Patient141A  | Patient159  |
| 11513 | Patient150A  | Patient252B |
| 11513 | Patient159   | Patient261D |
| 11513 | Patient196B  | Patient235E |
| 11513 | Patient222E  | Patient235E |
| 11514 | Patient026F  | Patient157  |
| 11514 | Patient053C  | Patient218A |
| 11514 | Patient066E  | Patient157  |
| 11514 | Patient074A  | Patient093C |
| 11514 | Patient074D  | Patient093C |
| 11514 | Patient074E  | Patient146  |
| 11514 | Patient079A1 | Patient081C |
| 11514 | Patient079A2 | Patient086C |
| 11514 | Patient081B  | Patient189E |
| 11514 | Patient081D  | Patient109C |
| 11514 | Patient081F  | Patient247D |
| 11514 | Patient086A  | Patient149B |
| 11514 | Patient086A  | Patient196D |
| 11514 | Patient086B  | Patient149B |
| 11514 | Patient086B  | Patient196D |
| 11514 | Patient086B  | Patient201E |
| 11514 | Patient092D  | Patient213B |
| 11514 | Patient103B  | Patient146  |
| 11514 | Patient108H  | Patient242  |
| 11514 | Patient109B  | Patient235E |
| 11514 | Patient121B  | Patient247D |
| 11514 | Patient123C  | Patient159  |
| 11514 | Patient127A  | Patient235F |
| 11514 | Patient157   | Patient230B |
| 11514 | Patient173A  | Patient222C |
| 11514 | Patient189A  | Patient235F |
| 11514 | Patient196E  | Patient235E |
| 11514 | Patient201B  | Patient235E |
| 11514 | Patient230D  | Patient252B |
| 11515 | Patient026D  | Patient109C |
| 11515 | Patient026E  | Patient108A |



|       |              |              |
|-------|--------------|--------------|
| 11515 | Patient045A  | Patient131   |
| 11515 | Patient053C  | Patient097B  |
| 11515 | Patient053C  | Patient236B  |
| 11515 | Patient066D  | Patient131   |
| 11515 | Patient066F  | Patient131   |
| 11515 | Patient079A2 | Patient081C  |
| 11515 | Patient081A2 | Patient189E  |
| 11515 | Patient081B  | Patient189A  |
| 11515 | Patient081B  | Patient247D  |
| 11515 | Patient081C  | Patient109D  |
| 11515 | Patient081D  | Patient108B1 |
| 11515 | Patient081D  | Patient108B2 |
| 11515 | Patient081D  | Patient108G  |
| 11515 | Patient086A  | Patient097B  |
| 11515 | Patient086A  | Patient097C  |
| 11515 | Patient086B  | Patient097B  |
| 11515 | Patient086B  | Patient097C  |
| 11515 | Patient086E  | Patient149B  |
| 11515 | Patient086E  | Patient196D  |
| 11515 | Patient086E  | Patient201E  |
| 11515 | Patient094D  | Patient120B  |
| 11515 | Patient145A  | Patient157   |
| 11515 | Patient146   | Patient195   |
| 11515 | Patient159   | Patient230F  |
| 11515 | Patient173A  | Patient196F  |
| 11515 | Patient189B  | Patient235F  |
| 11515 | Patient222D  | Patient235E  |
| 11516 | Patient023   | Patient081E  |
| 11516 | Patient026B  | Patient157   |
| 11516 | Patient026D  | Patient108G  |
| 11516 | Patient053A2 | Patient097B  |
| 11516 | Patient053A2 | Patient218A  |
| 11516 | Patient053A2 | Patient236B  |
| 11516 | Patient053B  | Patient097B  |
| 11516 | Patient053B  | Patient218A  |
| 11516 | Patient053B  | Patient236B  |
| 11516 | Patient053C  | Patient079C  |
| 11516 | Patient079C  | Patient081D  |
| 11516 | Patient081A2 | Patient189A  |
| 11516 | Patient081B  | Patient189B  |
| 11516 | Patient081C  | Patient108F  |
| 11516 | Patient081C  | Patient109B  |
| 11516 | Patient086A  | Patient201A  |
| 11516 | Patient086A  | Patient263B  |
| 11516 | Patient086B  | Patient201A  |
| 11516 | Patient086B  | Patient263B  |
| 11516 | Patient086E  | Patient097B  |
| 11516 | Patient086E  | Patient097C  |
| 11516 | Patient099D  | Patient235E  |
| 11516 | Patient103E  | Patient126E  |

|       |              |              |
|-------|--------------|--------------|
| 11516 | Patient108F  | Patient235E  |
| 11516 | Patient123B  | Patient159   |
| 11516 | Patient127B  | Patient235E  |
| 11516 | Patient189E  | Patient235E  |
| 11516 | Patient235C  | Patient247E  |
| 11517 | Patient023   | Patient242   |
| 11517 | Patient026D  | Patient109E  |
| 11517 | Patient053B  | Patient079C  |
| 11517 | Patient053C  | Patient218B  |
| 11517 | Patient066E  | Patient131   |
| 11517 | Patient074E  | Patient093C  |
| 11517 | Patient079B  | Patient242   |
| 11517 | Patient081A2 | Patient189B  |
| 11517 | Patient081C  | Patient109A  |
| 11517 | Patient081D  | Patient109E  |
| 11517 | Patient086A  | Patient184   |
| 11517 | Patient086C  | Patient246C  |
| 11517 | Patient086E  | Patient201A  |
| 11517 | Patient086E  | Patient263B  |
| 11517 | Patient092C  | Patient247A  |
| 11517 | Patient108D  | Patient235E  |
| 11517 | Patient149B  | Patient235F  |
| 11517 | Patient150A  | Patient252F  |
| 11517 | Patient201E  | Patient235F  |
| 11517 | Patient220A  | Patient235C  |
| 11517 | Patient235B  | Patient246A  |
| 11517 | Patient235F  | Patient263B  |
| 11518 | Patient026A  | Patient157   |
| 11518 | Patient026D  | Patient108H  |
| 11518 | Patient053A2 | Patient079C  |
| 11518 | Patient053C  | Patient097C  |
| 11518 | Patient053C  | Patient099E  |
| 11518 | Patient081A2 | Patient247D  |
| 11518 | Patient081D  | Patient108H  |
| 11518 | Patient086B  | Patient184   |
| 11518 | Patient086C  | Patient108A  |
| 11518 | Patient104B  | Patient235C  |
| 11518 | Patient109B  | Patient242   |
| 11518 | Patient123D  | Patient157   |
| 11518 | Patient127A  | Patient235E  |
| 11518 | Patient159   | Patient230B  |
| 11518 | Patient161B  | Patient252A  |
| 11518 | Patient189A  | Patient235E  |
| 11518 | Patient217J  | Patient246D  |
| 11518 | Patient217J  | Patient247A  |
| 11519 | Patient023   | Patient141C  |
| 11519 | Patient023   | Patient213A  |
| 11519 | Patient026D  | Patient108B1 |
| 11519 | Patient053A2 | Patient097C  |
| 11519 | Patient053A2 | Patient099E  |

|       |              |              |
|-------|--------------|--------------|
| 11519 | Patient053B  | Patient097C  |
| 11519 | Patient053B  | Patient099E  |
| 11519 | Patient053C  | Patient079A1 |
| 11519 | Patient053C  | Patient108A  |
| 11519 | Patient066D  | Patient159   |
| 11519 | Patient086C  | Patient252A  |
| 11519 | Patient086E  | Patient184   |
| 11519 | Patient092C  | Patient247B  |
| 11519 | Patient092C  | Patient247C  |
| 11519 | Patient094D  | Patient120C  |
| 11519 | Patient108B1 | Patient141A  |
| 11519 | Patient108B1 | Patient141C  |
| 11519 | Patient109A  | Patient242   |
| 11519 | Patient150B  | Patient252A  |
| 11519 | Patient173A  | Patient247D  |
| 11519 | Patient189B  | Patient235E  |
| 11519 | Patient230D  | Patient252F  |
| 11520 | Patient023   | Patient081F  |
| 11520 | Patient023   | Patient141A  |
| 11520 | Patient026D  | Patient108B2 |
| 11520 | Patient026E  | Patient109C  |
| 11520 | Patient026F  | Patient159   |
| 11520 | Patient032A  | Patient247D  |
| 11520 | Patient032B  | Patient189E  |
| 11520 | Patient045C  | Patient131   |
| 11520 | Patient053A2 | Patient108A  |
| 11520 | Patient053A2 | Patient218B  |
| 11520 | Patient053B  | Patient079A1 |
| 11520 | Patient053B  | Patient108A  |
| 11520 | Patient053B  | Patient218B  |
| 11520 | Patient053C  | Patient079A2 |
| 11520 | Patient066E  | Patient159   |
| 11520 | Patient066F  | Patient159   |
| 11520 | Patient079A1 | Patient081D  |
| 11520 | Patient086C  | Patient109C  |
| 11520 | Patient086C  | Patient246B  |
| 11520 | Patient094E  | Patient120B  |
| 11520 | Patient100A  | Patient103A  |
| 11520 | Patient103A  | Patient146   |
| 11520 | Patient108F  | Patient242   |
| 11520 | Patient141D  | Patient189A  |
| 11520 | Patient161B  | Patient252B  |
| 11520 | Patient184   | Patient235F  |
| 11520 | Patient217J  | Patient246E  |
| 11520 | Patient217J  | Patient247B  |
| 11520 | Patient217J  | Patient247C  |
| 11520 | Patient235C  | Patient247A  |
| 11520 | Patient235F  | Patient246C  |
| 11521 | Patient023   | Patient081B  |
| 11521 | Patient023   | Patient141B  |

|       |              |              |
|-------|--------------|--------------|
| 11521 | Patient026B  | Patient159   |
| 11521 | Patient026D  | Patient109D  |
| 11521 | Patient026E  | Patient108G  |
| 11521 | Patient032B  | Patient189A  |
| 11521 | Patient045B  | Patient131   |
| 11521 | Patient053A2 | Patient079A1 |
| 11521 | Patient053B  | Patient079A2 |
| 11521 | Patient053C  | Patient187   |
| 11521 | Patient079A2 | Patient081D  |
| 11521 | Patient081A1 | Patient189E  |
| 11521 | Patient081D  | Patient109D  |
| 11521 | Patient086A  | Patient247A  |
| 11521 | Patient086B  | Patient247A  |
| 11521 | Patient086C  | Patient108G  |
| 11521 | Patient086C  | Patient252B  |
| 11521 | Patient104A  | Patient235C  |
| 11521 | Patient108B1 | Patient141B  |
| 11521 | Patient108B2 | Patient141A  |
| 11521 | Patient108B2 | Patient141C  |
| 11521 | Patient141D  | Patient189E  |
| 11521 | Patient149B  | Patient235E  |
| 11521 | Patient218A  | Patient235C  |
| 11521 | Patient235B  | Patient247E  |
| 11521 | Patient235C  | Patient247B  |
| 11521 | Patient235E  | Patient263B  |
| 11522 | Patient026D  | Patient109A  |
| 11522 | Patient026E  | Patient109E  |
| 11522 | Patient032B  | Patient189B  |
| 11522 | Patient053A2 | Patient079A2 |
| 11522 | Patient053B  | Patient187   |
| 11522 | Patient053C  | Patient222B  |
| 11522 | Patient079C  | Patient086A  |
| 11522 | Patient079C  | Patient086B  |
| 11522 | Patient081A1 | Patient189A  |
| 11522 | Patient081C  | Patient108D  |
| 11522 | Patient081D  | Patient108F  |
| 11522 | Patient081D  | Patient109A  |
| 11522 | Patient081D  | Patient109B  |
| 11522 | Patient081E  | Patient108B1 |
| 11522 | Patient081E  | Patient108B2 |
| 11522 | Patient086C  | Patient109E  |
| 11522 | Patient086E  | Patient247A  |
| 11522 | Patient092C  | Patient246C  |
| 11522 | Patient131   | Patient213A  |
| 11522 | Patient173A  | Patient263A  |
| 11522 | Patient201A  | Patient235F  |
| 11522 | Patient201E  | Patient235E  |
| 11522 | Patient220B  | Patient252B  |
| 11522 | Patient235C  | Patient247C  |
| 11523 | Patient023   | Patient081A2 |

|       |              |              |
|-------|--------------|--------------|
| 11523 | Patient026D  | Patient108F  |
| 11523 | Patient026E  | Patient108H  |
| 11523 | Patient034A  | Patient247D  |
| 11523 | Patient053A2 | Patient187   |
| 11523 | Patient053A2 | Patient222B  |
| 11523 | Patient053B  | Patient222B  |
| 11523 | Patient053C  | Patient108G  |
| 11523 | Patient079C  | Patient086E  |
| 11523 | Patient081A1 | Patient189B  |
| 11523 | Patient081A1 | Patient247D  |
| 11523 | Patient086A  | Patient247B  |
| 11523 | Patient086A  | Patient247C  |
| 11523 | Patient086B  | Patient247B  |
| 11523 | Patient086B  | Patient247C  |
| 11523 | Patient086C  | Patient108H  |
| 11523 | Patient092C  | Patient246A  |
| 11523 | Patient108B2 | Patient141B  |
| 11523 | Patient108D  | Patient242   |
| 11523 | Patient123D  | Patient159   |
| 11523 | Patient141D  | Patient189B  |
| 11523 | Patient150B  | Patient252B  |
| 11523 | Patient220A  | Patient235B  |
| 11523 | Patient220B  | Patient252A  |
| 11524 | Patient026D  | Patient109B  |
| 11524 | Patient026E  | Patient108B1 |
| 11524 | Patient053A2 | Patient108G  |
| 11524 | Patient053B  | Patient108G  |
| 11524 | Patient053C  | Patient109C  |
| 11524 | Patient079B  | Patient086C  |
| 11524 | Patient086E  | Patient247B  |
| 11524 | Patient086E  | Patient247C  |
| 11524 | Patient092D  | Patient104B  |
| 11524 | Patient094E  | Patient120C  |
| 11524 | Patient104B  | Patient235B  |
| 11524 | Patient121A  | Patient213B  |
| 11524 | Patient145A  | Patient159   |
| 11524 | Patient184   | Patient235E  |
| 11524 | Patient196D  | Patient235C  |
| 11524 | Patient235C  | Patient236B  |
| 11524 | Patient235E  | Patient246C  |
| 11524 | Patient235F  | Patient246B  |
| 11525 | Patient026D  | Patient079C  |
| 11525 | Patient026E  | Patient108B2 |
| 11525 | Patient034E  | Patient247D  |
| 11525 | Patient053A2 | Patient109C  |
| 11525 | Patient053B  | Patient109C  |
| 11525 | Patient053C  | Patient108H  |
| 11525 | Patient053C  | Patient236A  |
| 11525 | Patient086C  | Patient252F  |
| 11525 | Patient099E  | Patient235C  |

|       |              |              |
|-------|--------------|--------------|
| 11525 | Patient161B  | Patient252F  |
| 11525 | Patient189E  | Patient235C  |
| 11525 | Patient218B  | Patient235C  |
| 11525 | Patient247D  | Patient261A  |
| 11526 | Patient026A  | Patient159   |
| 11526 | Patient026E  | Patient109D  |
| 11526 | Patient053A2 | Patient108H  |
| 11526 | Patient053B  | Patient108H  |
| 11526 | Patient053B  | Patient236A  |
| 11526 | Patient053C  | Patient109E  |
| 11526 | Patient053C  | Patient189E  |
| 11526 | Patient079A1 | Patient086A  |
| 11526 | Patient079A1 | Patient086B  |
| 11526 | Patient079B  | Patient081C  |
| 11526 | Patient081F  | Patient108B1 |
| 11526 | Patient081F  | Patient108B2 |
| 11526 | Patient086A  | Patient246A  |
| 11526 | Patient086B  | Patient246A  |
| 11526 | Patient086C  | Patient109D  |
| 11526 | Patient086C  | Patient246E  |
| 11526 | Patient092D  | Patient104A  |
| 11526 | Patient145C  | Patient247D  |
| 11526 | Patient201A  | Patient235E  |
| 11526 | Patient218A  | Patient235B  |
| 11526 | Patient235B  | Patient247A  |
| 11527 | Patient023   | Patient045A  |
| 11527 | Patient026E  | Patient109A  |
| 11527 | Patient053A2 | Patient109E  |
| 11527 | Patient053A2 | Patient236A  |
| 11527 | Patient053B  | Patient109E  |
| 11527 | Patient053C  | Patient189A  |
| 11527 | Patient053C  | Patient196A  |
| 11527 | Patient053C  | Patient196C  |
| 11527 | Patient074C  | Patient093B  |
| 11527 | Patient079A1 | Patient086E  |
| 11527 | Patient079A2 | Patient086A  |
| 11527 | Patient079A2 | Patient086B  |
| 11527 | Patient081B  | Patient108B1 |
| 11527 | Patient081B  | Patient108B2 |
| 11527 | Patient086C  | Patient108F  |
| 11527 | Patient086C  | Patient246D  |
| 11527 | Patient086E  | Patient246A  |
| 11527 | Patient092C  | Patient246B  |
| 11527 | Patient100A  | Patient126C  |
| 11527 | Patient104A  | Patient235B  |
| 11527 | Patient126D  | Patient213A  |
| 11527 | Patient141A  | Patient189A  |
| 11527 | Patient145C  | Patient189E  |
| 11527 | Patient150B  | Patient252F  |
| 11527 | Patient189A  | Patient235C  |

|       |              |              |
|-------|--------------|--------------|
| 11527 | Patient235B  | Patient247B  |
| 11527 | Patient235B  | Patient247C  |
| 11528 | Patient023   | Patient081A1 |
| 11528 | Patient026D  | Patient079A1 |
| 11528 | Patient026D  | Patient108D  |
| 11528 | Patient026E  | Patient108F  |
| 11528 | Patient034C  | Patient247D  |
| 11528 | Patient034D  | Patient247D  |
| 11528 | Patient053A2 | Patient189E  |
| 11528 | Patient053A2 | Patient196A  |
| 11528 | Patient053A2 | Patient196C  |
| 11528 | Patient053B  | Patient189E  |
| 11528 | Patient053B  | Patient196A  |
| 11528 | Patient053B  | Patient196C  |
| 11528 | Patient053C  | Patient079B  |
| 11528 | Patient053C  | Patient189B  |
| 11528 | Patient053C  | Patient222A  |
| 11528 | Patient053C  | Patient252A  |
| 11528 | Patient074B  | Patient093B  |
| 11528 | Patient079A2 | Patient086E  |
| 11528 | Patient081D  | Patient108D  |
| 11528 | Patient086A  | Patient108A  |
| 11528 | Patient086B  | Patient108A  |
| 11528 | Patient086C  | Patient109A  |
| 11528 | Patient121B  | Patient213B  |
| 11528 | Patient141A  | Patient189E  |
| 11528 | Patient141C  | Patient189A  |
| 11528 | Patient145C  | Patient189A  |
| 11528 | Patient230A  | Patient247D  |
| 11528 | Patient235E  | Patient246B  |
| 11528 | Patient235F  | Patient246D  |
| 11529 | Patient026D  | Patient079A2 |
| 11529 | Patient026E  | Patient109B  |
| 11529 | Patient032A  | Patient189B  |
| 11529 | Patient032A  | Patient189E  |
| 11529 | Patient053A2 | Patient079B  |
| 11529 | Patient053A2 | Patient189A  |
| 11529 | Patient053A2 | Patient222A  |
| 11529 | Patient053A2 | Patient222F  |
| 11529 | Patient053B  | Patient079B  |
| 11529 | Patient053B  | Patient189A  |
| 11529 | Patient053B  | Patient222A  |
| 11529 | Patient053B  | Patient222F  |
| 11529 | Patient053C  | Patient196B  |
| 11529 | Patient053C  | Patient196E  |
| 11529 | Patient053C  | Patient222F  |
| 11529 | Patient074A  | Patient093B  |
| 11529 | Patient074D  | Patient093B  |
| 11529 | Patient081A2 | Patient108B1 |
| 11529 | Patient081A2 | Patient108B2 |

|       |              |              |
|-------|--------------|--------------|
| 11529 | Patient086C  | Patient109B  |
| 11529 | Patient086E  | Patient108A  |
| 11529 | Patient092D  | Patient252D  |
| 11529 | Patient099E  | Patient235B  |
| 11529 | Patient141C  | Patient189E  |
| 11529 | Patient141C  | Patient247D  |
| 11529 | Patient145C  | Patient189B  |
| 11529 | Patient187   | Patient235C  |
| 11529 | Patient196D  | Patient235B  |
| 11530 | Patient026E  | Patient079C  |
| 11530 | Patient032A  | Patient189A  |
| 11530 | Patient053A2 | Patient189B  |
| 11530 | Patient053A2 | Patient196B  |
| 11530 | Patient053A2 | Patient196E  |
| 11530 | Patient053A2 | Patient252A  |
| 11530 | Patient053B  | Patient189B  |
| 11530 | Patient053B  | Patient196B  |
| 11530 | Patient053B  | Patient196E  |
| 11530 | Patient053B  | Patient252A  |
| 11530 | Patient053C  | Patient109A  |
| 11530 | Patient053C  | Patient109D  |
| 11530 | Patient053C  | Patient213B  |
| 11530 | Patient053C  | Patient252B  |
| 11530 | Patient086A  | Patient246C  |
| 11530 | Patient086B  | Patient246C  |
| 11530 | Patient092D  | Patient220A  |
| 11530 | Patient097E  | Patient235A  |
| 11530 | Patient103D  | Patient108B1 |
| 11530 | Patient103D  | Patient108B2 |
| 11530 | Patient104B  | Patient121A  |
| 11530 | Patient141B  | Patient189A  |
| 11530 | Patient173B  | Patient213B  |
| 11530 | Patient189B  | Patient235C  |
| 11530 | Patient220B  | Patient252F  |
| 11530 | Patient222B  | Patient235C  |
| 11530 | Patient235B  | Patient236B  |
| 11531 | Patient053A2 | Patient109A  |
| 11531 | Patient053A2 | Patient109D  |
| 11531 | Patient053A2 | Patient213B  |
| 11531 | Patient053B  | Patient109A  |
| 11531 | Patient053B  | Patient109D  |
| 11531 | Patient053B  | Patient213B  |
| 11531 | Patient053C  | Patient108F  |
| 11531 | Patient053C  | Patient109B  |
| 11531 | Patient053C  | Patient222D  |
| 11531 | Patient053C  | Patient222E  |
| 11531 | Patient086A  | Patient109C  |
| 11531 | Patient086E  | Patient246C  |
| 11531 | Patient097A  | Patient235A  |
| 11531 | Patient103D  | Patient232B  |



|       |              |              |
|-------|--------------|--------------|
| 11531 | Patient104B  | Patient121B  |
| 11531 | Patient104B  | Patient173B  |
| 11531 | Patient108B1 | Patient173B  |
| 11531 | Patient126D  | Patient195   |
| 11531 | Patient141A  | Patient189B  |
| 11531 | Patient141B  | Patient189E  |
| 11531 | Patient141C  | Patient189B  |
| 11532 | Patient034A  | Patient189E  |
| 11532 | Patient034B  | Patient247D  |
| 11532 | Patient053A2 | Patient108F  |
| 11532 | Patient053A2 | Patient109B  |
| 11532 | Patient053A2 | Patient222D  |
| 11532 | Patient053A2 | Patient222E  |
| 11532 | Patient053B  | Patient108F  |
| 11532 | Patient053B  | Patient109B  |
| 11532 | Patient053B  | Patient222D  |
| 11532 | Patient053B  | Patient222E  |
| 11532 | Patient053B  | Patient252B  |
| 11532 | Patient053C  | Patient099B  |
| 11532 | Patient053C  | Patient201B  |
| 11532 | Patient074E  | Patient093B  |
| 11532 | Patient079B  | Patient081D  |
| 11532 | Patient086A  | Patient252A  |
| 11532 | Patient086B  | Patient109C  |
| 11532 | Patient086B  | Patient252A  |
| 11532 | Patient092C  | Patient246D  |
| 11532 | Patient108B2 | Patient173B  |
| 11532 | Patient121A  | Patient252D  |
| 11532 | Patient141B  | Patient247D  |
| 11532 | Patient189E  | Patient261A  |
| 11532 | Patient218B  | Patient235B  |
| 11532 | Patient235E  | Patient246D  |
| 11532 | Patient235F  | Patient246E  |
| 11533 | Patient023   | Patient026D  |
| 11533 | Patient023   | Patient045B  |
| 11533 | Patient023   | Patient045C  |
| 11533 | Patient026E  | Patient079A1 |
| 11533 | Patient026E  | Patient108D  |
| 11533 | Patient034A  | Patient189A  |
| 11533 | Patient034C  | Patient189E  |
| 11533 | Patient053A2 | Patient201B  |
| 11533 | Patient053A2 | Patient252B  |
| 11533 | Patient053B  | Patient099B  |
| 11533 | Patient053B  | Patient201B  |
| 11533 | Patient053C  | Patient099A  |
| 11533 | Patient053C  | Patient265   |
| 11533 | Patient086A  | Patient108G  |
| 11533 | Patient086A  | Patient246B  |
| 11533 | Patient086B  | Patient108G  |
| 11533 | Patient086B  | Patient246B  |

|       |              |              |
|-------|--------------|--------------|
| 11533 | Patient086C  | Patient108D  |
| 11533 | Patient086E  | Patient109C  |
| 11533 | Patient086E  | Patient252A  |
| 11533 | Patient100A  | Patient195   |
| 11533 | Patient108A  | Patient230D  |
| 11533 | Patient121B  | Patient252D  |
| 11533 | Patient141B  | Patient189B  |
| 11533 | Patient173B  | Patient252D  |
| 11533 | Patient189A  | Patient235B  |
| 11533 | Patient189A  | Patient261A  |
| 11533 | Patient189E  | Patient230E  |
| 11533 | Patient189E  | Patient235B  |
| 11533 | Patient222A  | Patient235C  |
| 11533 | Patient230E  | Patient247D  |
| 11533 | Patient235C  | Patient236A  |
| 11533 | Patient247D  | Patient261B  |
| 11534 | Patient026E  | Patient079A2 |
| 11534 | Patient034C  | Patient189A  |
| 11534 | Patient034E  | Patient189E  |
| 11534 | Patient053A2 | Patient099B  |
| 11534 | Patient053A2 | Patient265   |
| 11534 | Patient053B  | Patient099A  |
| 11534 | Patient053B  | Patient265   |
| 11534 | Patient053C  | Patient247E  |
| 11534 | Patient074C  | Patient094D  |
| 11534 | Patient081A1 | Patient108B1 |
| 11534 | Patient081A1 | Patient108B2 |
| 11534 | Patient086A  | Patient252B  |
| 11534 | Patient086E  | Patient108G  |
| 11534 | Patient086E  | Patient246B  |
| 11534 | Patient092C  | Patient246E  |
| 11534 | Patient099B  | Patient235C  |
| 11534 | Patient104A  | Patient121A  |
| 11534 | Patient141A  | Patient247D  |
| 11534 | Patient187   | Patient235B  |
| 11534 | Patient189A  | Patient230E  |
| 11534 | Patient189B  | Patient235B  |
| 11534 | Patient222B  | Patient235B  |
| 11535 | Patient034A  | Patient189B  |
| 11535 | Patient034E  | Patient189A  |
| 11535 | Patient053A2 | Patient099A  |
| 11535 | Patient053A2 | Patient247E  |
| 11535 | Patient053B  | Patient247E  |
| 11535 | Patient053C  | Patient099C  |
| 11535 | Patient053C  | Patient108D  |
| 11535 | Patient053C  | Patient252F  |
| 11535 | Patient074B  | Patient094D  |
| 11535 | Patient086A  | Patient109E  |
| 11535 | Patient086B  | Patient252B  |
| 11535 | Patient086E  | Patient252B  |

|       |              |              |
|-------|--------------|--------------|
| 11535 | Patient092D  | Patient097E  |
| 11535 | Patient099A  | Patient235C  |
| 11535 | Patient100A  | Patient224B  |
| 11535 | Patient104A  | Patient121B  |
| 11535 | Patient104A  | Patient173B  |
| 11535 | Patient120D  | Patient126E  |
| 11535 | Patient123A  | Patient247D  |
| 11535 | Patient141D  | Patient213B  |
| 11535 | Patient189B  | Patient230E  |
| 11535 | Patient189B  | Patient261A  |
| 11536 | Patient034C  | Patient189B  |
| 11536 | Patient034E  | Patient189B  |
| 11536 | Patient053A2 | Patient108D  |
| 11536 | Patient053B  | Patient099C  |
| 11536 | Patient053B  | Patient108D  |
| 11536 | Patient053C  | Patient127A  |
| 11536 | Patient053C  | Patient196D  |
| 11536 | Patient074A  | Patient094D  |
| 11536 | Patient074D  | Patient094D  |
| 11536 | Patient079B  | Patient086A  |
| 11536 | Patient079B  | Patient086B  |
| 11536 | Patient079B  | Patient086E  |
| 11536 | Patient086A  | Patient108H  |
| 11536 | Patient086B  | Patient108H  |
| 11536 | Patient086B  | Patient109E  |
| 11536 | Patient109C  | Patient230D  |
| 11536 | Patient196A  | Patient235C  |
| 11536 | Patient222F  | Patient235C  |
| 11536 | Patient235C  | Patient265   |
| 11536 | Patient235E  | Patient246E  |
| 11537 | Patient023   | Patient230D  |
| 11537 | Patient026D  | Patient079B  |
| 11537 | Patient032B  | Patient104B  |
| 11537 | Patient034D  | Patient189E  |
| 11537 | Patient045A  | Patient252A  |
| 11537 | Patient053A2 | Patient099C  |
| 11537 | Patient053A2 | Patient127A  |
| 11537 | Patient053A2 | Patient196D  |
| 11537 | Patient053A2 | Patient252F  |
| 11537 | Patient053B  | Patient127A  |
| 11537 | Patient053B  | Patient196D  |
| 11537 | Patient053B  | Patient252F  |
| 11537 | Patient053C  | Patient127B  |
| 11537 | Patient053C  | Patient201E  |
| 11537 | Patient086E  | Patient108H  |
| 11537 | Patient086E  | Patient109E  |
| 11537 | Patient097D  | Patient235A  |
| 11537 | Patient103E  | Patient108B1 |
| 11537 | Patient103E  | Patient108B2 |
| 11537 | Patient123C  | Patient247D  |

|       |              |             |
|-------|--------------|-------------|
| 11537 | Patient196C  | Patient235C |
| 11538 | Patient023   | Patient026E |
| 11538 | Patient023   | Patient173B |
| 11538 | Patient034D  | Patient189A |
| 11538 | Patient053A2 | Patient127B |
| 11538 | Patient053A2 | Patient201E |
| 11538 | Patient053B  | Patient127B |
| 11538 | Patient053B  | Patient201E |
| 11538 | Patient079C  | Patient092D |
| 11538 | Patient081E  | Patient213B |
| 11538 | Patient092D  | Patient097A |
| 11538 | Patient097B  | Patient235A |
| 11538 | Patient099E  | Patient121A |
| 11538 | Patient100A  | Patient224A |
| 11538 | Patient103E  | Patient232B |
| 11538 | Patient108G  | Patient230D |
| 11538 | Patient121A  | Patient220A |
| 11538 | Patient157   | Patient181B |
| 11538 | Patient222A  | Patient235B |
| 11538 | Patient222E  | Patient235C |
| 11538 | Patient230F  | Patient247D |
| 11538 | Patient247D  | Patient261D |
| 11539 | Patient034D  | Patient189B |
| 11539 | Patient053C  | Patient099D |
| 11539 | Patient053C  | Patient149B |
| 11539 | Patient053C  | Patient246A |
| 11539 | Patient053C  | Patient246C |
| 11539 | Patient074C  | Patient094E |
| 11539 | Patient074E  | Patient094D |
| 11539 | Patient079A1 | Patient092D |
| 11539 | Patient086A  | Patient109D |
| 11539 | Patient086A  | Patient246D |
| 11539 | Patient086A  | Patient246E |
| 11539 | Patient086A  | Patient252F |
| 11539 | Patient086B  | Patient109D |
| 11539 | Patient086B  | Patient246D |
| 11539 | Patient086B  | Patient246E |
| 11539 | Patient086B  | Patient252F |
| 11539 | Patient092D  | Patient099E |
| 11539 | Patient092D  | Patient252A |
| 11539 | Patient099C  | Patient235C |
| 11539 | Patient108B1 | Patient230A |
| 11539 | Patient108B1 | Patient230D |
| 11539 | Patient108B2 | Patient230A |
| 11539 | Patient108B2 | Patient230D |
| 11539 | Patient109E  | Patient230D |
| 11539 | Patient120B  | Patient126E |
| 11539 | Patient121B  | Patient220A |
| 11539 | Patient123B  | Patient247D |
| 11539 | Patient196B  | Patient235C |

|       |              |             |
|-------|--------------|-------------|
| 11540 | Patient026F  | Patient247D |
| 11540 | Patient032A  | Patient213B |
| 11540 | Patient045A  | Patient097E |
| 11540 | Patient053A2 | Patient149B |
| 11540 | Patient053A2 | Patient246A |
| 11540 | Patient053A2 | Patient246C |
| 11540 | Patient053B  | Patient099D |
| 11540 | Patient053B  | Patient149B |
| 11540 | Patient053B  | Patient246A |
| 11540 | Patient053B  | Patient246C |
| 11540 | Patient053C  | Patient184  |
| 11540 | Patient053C  | Patient201A |
| 11540 | Patient074B  | Patient094E |
| 11540 | Patient079A2 | Patient092D |
| 11540 | Patient086A  | Patient108F |
| 11540 | Patient086A  | Patient109B |
| 11540 | Patient086B  | Patient108F |
| 11540 | Patient086E  | Patient109D |
| 11540 | Patient086E  | Patient246D |
| 11540 | Patient086E  | Patient246E |
| 11540 | Patient086E  | Patient252F |
| 11540 | Patient099B  | Patient235B |
| 11540 | Patient103D  | Patient232A |
| 11540 | Patient103D  | Patient232C |
| 11540 | Patient108H  | Patient230D |
| 11540 | Patient127B  | Patient235C |
| 11540 | Patient141D  | Patient252D |
| 11540 | Patient157   | Patient181A |
| 11540 | Patient173B  | Patient220A |
| 11540 | Patient189E  | Patient230A |
| 11540 | Patient189E  | Patient230F |
| 11540 | Patient196E  | Patient235C |
| 11540 | Patient201B  | Patient235C |
| 11540 | Patient222D  | Patient235C |
| 11540 | Patient235A  | Patient252A |
| 11540 | Patient235B  | Patient236A |
| 11541 | Patient023   | Patient230A |
| 11541 | Patient032B  | Patient104A |
| 11541 | Patient034B  | Patient189E |
| 11541 | Patient045A  | Patient097A |
| 11541 | Patient045A  | Patient252B |
| 11541 | Patient053A2 | Patient099D |
| 11541 | Patient053A2 | Patient184  |
| 11541 | Patient053A2 | Patient201A |
| 11541 | Patient053B  | Patient184  |
| 11541 | Patient053B  | Patient201A |
| 11541 | Patient074A  | Patient094E |
| 11541 | Patient074D  | Patient094E |
| 11541 | Patient086A  | Patient109A |
| 11541 | Patient086B  | Patient109B |

|       |              |              |
|-------|--------------|--------------|
| 11541 | Patient086E  | Patient108F  |
| 11541 | Patient086E  | Patient109B  |
| 11541 | Patient092D  | Patient097D  |
| 11541 | Patient092D  | Patient218B  |
| 11541 | Patient097C  | Patient235A  |
| 11541 | Patient099A  | Patient235B  |
| 11541 | Patient103D  | Patient232E  |
| 11541 | Patient157   | Patient224B  |
| 11541 | Patient189A  | Patient230A  |
| 11541 | Patient189E  | Patient261B  |
| 11541 | Patient196A  | Patient235B  |
| 11541 | Patient222F  | Patient235B  |
| 11541 | Patient230B  | Patient247D  |
| 11542 | Patient026A  | Patient108B1 |
| 11542 | Patient026A  | Patient108B2 |
| 11542 | Patient026B  | Patient247D  |
| 11542 | Patient026E  | Patient079B  |
| 11542 | Patient034B  | Patient189A  |
| 11542 | Patient086B  | Patient109A  |
| 11542 | Patient092D  | Patient187   |
| 11542 | Patient092D  | Patient218A  |
| 11542 | Patient092D  | Patient252B  |
| 11542 | Patient099E  | Patient121B  |
| 11542 | Patient121A  | Patient218A  |
| 11542 | Patient127A  | Patient235C  |
| 11542 | Patient173B  | Patient218A  |
| 11542 | Patient189A  | Patient230F  |
| 11542 | Patient189A  | Patient261B  |
| 11542 | Patient189B  | Patient230A  |
| 11542 | Patient189B  | Patient230F  |
| 11542 | Patient196C  | Patient235B  |
| 11542 | Patient235A  | Patient252B  |
| 11542 | Patient235B  | Patient265   |
| 11543 | Patient032B  | Patient252D  |
| 11543 | Patient034B  | Patient189B  |
| 11543 | Patient045A  | Patient126D  |
| 11543 | Patient045B  | Patient252A  |
| 11543 | Patient045C  | Patient252A  |
| 11543 | Patient053C  | Patient263B  |
| 11543 | Patient081B  | Patient213B  |
| 11543 | Patient081F  | Patient213B  |
| 11543 | Patient081F  | Patient252D  |
| 11543 | Patient086E  | Patient109A  |
| 11543 | Patient099D  | Patient235C  |
| 11543 | Patient109D  | Patient230D  |
| 11543 | Patient120C  | Patient126E  |
| 11543 | Patient121B  | Patient218A  |
| 11543 | Patient126C  | Patient157   |
| 11543 | Patient189B  | Patient261B  |
| 11544 | Patient021A2 | Patient213A  |

|       |              |             |
|-------|--------------|-------------|
| 11544 | Patient032B  | Patient213B |
| 11544 | Patient045A  | Patient108A |
| 11544 | Patient053A2 | Patient263B |
| 11544 | Patient053B  | Patient263B |
| 11544 | Patient053C  | Patient246B |
| 11544 | Patient074E  | Patient094E |
| 11544 | Patient092D  | Patient097B |
| 11544 | Patient092D  | Patient108A |
| 11544 | Patient092D  | Patient236B |
| 11544 | Patient120D  | Patient146  |
| 11544 | Patient145A  | Patient247D |
| 11544 | Patient196B  | Patient235B |
| 11544 | Patient222E  | Patient235B |
| 11545 | Patient026A  | Patient247D |
| 11545 | Patient032B  | Patient220A |
| 11545 | Patient032B  | Patient222B |
| 11545 | Patient045A  | Patient109C |
| 11545 | Patient045A  | Patient252F |
| 11545 | Patient045C  | Patient097A |
| 11545 | Patient045C  | Patient097E |
| 11545 | Patient045C  | Patient252B |
| 11545 | Patient053A2 | Patient246B |
| 11545 | Patient053B  | Patient246B |
| 11545 | Patient066D  | Patient247D |
| 11545 | Patient066E  | Patient247D |
| 11545 | Patient066F  | Patient247D |
| 11545 | Patient079C  | Patient230D |
| 11545 | Patient081A2 | Patient213B |
| 11545 | Patient081E  | Patient252D |
| 11545 | Patient092D  | Patient109C |
| 11545 | Patient099C  | Patient235B |
| 11545 | Patient099E  | Patient173B |
| 11545 | Patient104B  | Patient141D |
| 11545 | Patient108B1 | Patient230E |
| 11545 | Patient108B2 | Patient230E |
| 11545 | Patient108F  | Patient230D |
| 11545 | Patient121A  | Patient236B |
| 11545 | Patient126D  | Patient224B |
| 11545 | Patient196E  | Patient235B |
| 11545 | Patient201B  | Patient235B |
| 11545 | Patient222D  | Patient235B |
| 11545 | Patient235A  | Patient252F |
| 11546 | Patient032A  | Patient104B |
| 11546 | Patient034A  | Patient213B |
| 11546 | Patient034C  | Patient213B |
| 11546 | Patient045A  | Patient097D |
| 11546 | Patient045B  | Patient097A |
| 11546 | Patient045B  | Patient097E |
| 11546 | Patient045B  | Patient252B |
| 11546 | Patient086A  | Patient108D |

|       |              |              |
|-------|--------------|--------------|
| 11546 | Patient086B  | Patient108D  |
| 11546 | Patient092D  | Patient099A  |
| 11546 | Patient092D  | Patient099B  |
| 11546 | Patient092D  | Patient108G  |
| 11546 | Patient092D  | Patient108H  |
| 11546 | Patient092D  | Patient109E  |
| 11546 | Patient092D  | Patient189E  |
| 11546 | Patient092D  | Patient252F  |
| 11546 | Patient103D  | Patient232D  |
| 11546 | Patient120B  | Patient146   |
| 11546 | Patient121A  | Patient218B  |
| 11546 | Patient121B  | Patient236B  |
| 11546 | Patient123D  | Patient247D  |
| 11546 | Patient141D  | Patient222B  |
| 11546 | Patient145A  | Patient189E  |
| 11546 | Patient149B  | Patient235C  |
| 11546 | Patient173B  | Patient218B  |
| 11546 | Patient189E  | Patient261D  |
| 11546 | Patient201E  | Patient235C  |
| 11546 | Patient213B  | Patient261A  |
| 11546 | Patient235C  | Patient263B  |
| 11547 | Patient021A1 | Patient213A  |
| 11547 | Patient021A2 | Patient235C  |
| 11547 | Patient045A  | Patient108B1 |
| 11547 | Patient045A  | Patient108B2 |
| 11547 | Patient045C  | Patient126D  |
| 11547 | Patient045D  | Patient103D  |
| 11547 | Patient053C  | Patient247A  |
| 11547 | Patient081B  | Patient252D  |
| 11547 | Patient081E  | Patient220A  |
| 11547 | Patient086E  | Patient108D  |
| 11547 | Patient092D  | Patient189A  |
| 11547 | Patient092D  | Patient189B  |
| 11547 | Patient103A  | Patient157   |
| 11547 | Patient103E  | Patient232A  |
| 11547 | Patient103E  | Patient232C  |
| 11547 | Patient104A  | Patient141D  |
| 11547 | Patient104B  | Patient261A  |
| 11547 | Patient109A  | Patient230D  |
| 11547 | Patient109B  | Patient230D  |
| 11547 | Patient120C  | Patient146   |
| 11547 | Patient121A  | Patient187   |
| 11547 | Patient121B  | Patient218B  |
| 11547 | Patient126C  | Patient159   |
| 11547 | Patient127B  | Patient235B  |
| 11547 | Patient145A  | Patient189A  |
| 11547 | Patient145C  | Patient213B  |
| 11547 | Patient173B  | Patient222B  |
| 11547 | Patient189A  | Patient261D  |
| 11548 | Patient021A1 | Patient235C  |



|       |              |              |
|-------|--------------|--------------|
| 11548 | Patient026F  | Patient108B1 |
| 11548 | Patient026F  | Patient108B2 |
| 11548 | Patient034E  | Patient213B  |
| 11548 | Patient045A  | Patient108G  |
| 11548 | Patient045A  | Patient109E  |
| 11548 | Patient045B  | Patient108A  |
| 11548 | Patient045B  | Patient126D  |
| 11548 | Patient045C  | Patient108A  |
| 11548 | Patient053A2 | Patient247A  |
| 11548 | Patient053B  | Patient247A  |
| 11548 | Patient079A1 | Patient230D  |
| 11548 | Patient092D  | Patient097C  |
| 11548 | Patient092D  | Patient099C  |
| 11548 | Patient092D  | Patient109D  |
| 11548 | Patient092D  | Patient222F  |
| 11548 | Patient092G  | Patient247D  |
| 11548 | Patient103E  | Patient232E  |
| 11548 | Patient121A  | Patient205   |
| 11548 | Patient121A  | Patient222B  |
| 11548 | Patient121B  | Patient187   |
| 11548 | Patient145A  | Patient189B  |
| 11548 | Patient173B  | Patient236B  |
| 11549 | Patient021A2 | Patient081E  |
| 11549 | Patient032A  | Patient252D  |
| 11549 | Patient034A  | Patient104B  |
| 11549 | Patient045A  | Patient097B  |
| 11549 | Patient045A  | Patient108H  |
| 11549 | Patient053C  | Patient246D  |
| 11549 | Patient053C  | Patient247B  |
| 11549 | Patient053C  | Patient247C  |
| 11549 | Patient079A2 | Patient230D  |
| 11549 | Patient081A2 | Patient252D  |
| 11549 | Patient081E  | Patient104B  |
| 11549 | Patient099D  | Patient235B  |
| 11549 | Patient103D  | Patient196F  |
| 11549 | Patient121B  | Patient222B  |
| 11549 | Patient127A  | Patient235B  |
| 11549 | Patient141D  | Patient220A  |
| 11549 | Patient189B  | Patient261D  |
| 11549 | Patient235C  | Patient246C  |
| 11550 | Patient032A  | Patient104A  |
| 11550 | Patient045A  | Patient097C  |
| 11550 | Patient045B  | Patient097D  |
| 11550 | Patient045C  | Patient097D  |
| 11550 | Patient045C  | Patient252F  |
| 11550 | Patient053A2 | Patient246D  |
| 11550 | Patient053A2 | Patient247B  |
| 11550 | Patient053A2 | Patient247C  |
| 11550 | Patient053B  | Patient246D  |
| 11550 | Patient053B  | Patient247B  |

|       |              |              |
|-------|--------------|--------------|
| 11550 | Patient053B  | Patient247C  |
| 11550 | Patient066D  | Patient189E  |
| 11550 | Patient066F  | Patient189E  |
| 11550 | Patient079B  | Patient092D  |
| 11550 | Patient079C  | Patient213A  |
| 11550 | Patient081F  | Patient220A  |
| 11550 | Patient092D  | Patient236A  |
| 11550 | Patient108D  | Patient230D  |
| 11550 | Patient189E  | Patient230B  |
| 11551 | Patient021A1 | Patient081E  |
| 11551 | Patient026B  | Patient108B1 |
| 11551 | Patient026B  | Patient108B2 |
| 11551 | Patient032B  | Patient097E  |
| 11551 | Patient032B  | Patient218A  |
| 11551 | Patient034C  | Patient104B  |
| 11551 | Patient034D  | Patient213B  |
| 11551 | Patient045B  | Patient109C  |
| 11551 | Patient045B  | Patient252F  |
| 11551 | Patient045C  | Patient109C  |
| 11551 | Patient053C  | Patient246E  |
| 11551 | Patient066D  | Patient189A  |
| 11551 | Patient066E  | Patient189E  |
| 11551 | Patient066F  | Patient189A  |
| 11551 | Patient081A1 | Patient213B  |
| 11551 | Patient081B  | Patient220A  |
| 11551 | Patient081E  | Patient222B  |
| 11551 | Patient081F  | Patient222B  |
| 11551 | Patient092D  | Patient265   |
| 11551 | Patient099E  | Patient141D  |
| 11551 | Patient104A  | Patient261A  |
| 11551 | Patient104B  | Patient145C  |
| 11551 | Patient184   | Patient235C  |
| 11551 | Patient189A  | Patient230B  |
| 11551 | Patient201A  | Patient235C  |
| 11551 | Patient213B  | Patient230A  |
| 11552 | Patient021A2 | Patient220B  |
| 11552 | Patient032A  | Patient222B  |
| 11552 | Patient032B  | Patient097A  |
| 11552 | Patient032B  | Patient099E  |
| 11552 | Patient034A  | Patient252D  |
| 11552 | Patient034E  | Patient104B  |
| 11552 | Patient045A  | Patient109D  |
| 11552 | Patient045C  | Patient108B1 |
| 11552 | Patient045C  | Patient108B2 |
| 11552 | Patient053A2 | Patient246E  |
| 11552 | Patient053B  | Patient246E  |
| 11552 | Patient066D  | Patient189B  |
| 11552 | Patient066F  | Patient189B  |
| 11552 | Patient079C  | Patient141D  |
| 11552 | Patient081F  | Patient104B  |

|       |              |              |
|-------|--------------|--------------|
| 11552 | Patient092D  | Patient099D  |
| 11552 | Patient092D  | Patient109A  |
| 11552 | Patient092D  | Patient222E  |
| 11552 | Patient097A  | Patient141D  |
| 11552 | Patient103D  | Patient222C  |
| 11552 | Patient108B1 | Patient230B  |
| 11552 | Patient108B1 | Patient230F  |
| 11552 | Patient108B2 | Patient230B  |
| 11552 | Patient108B2 | Patient230F  |
| 11552 | Patient120A  | Patient131   |
| 11552 | Patient141D  | Patient218A  |
| 11552 | Patient149B  | Patient235B  |
| 11552 | Patient189B  | Patient230B  |
| 11552 | Patient201E  | Patient235B  |
| 11552 | Patient235B  | Patient263B  |
| 11553 | Patient021A1 | Patient220B  |
| 11553 | Patient021A2 | Patient081F  |
| 11553 | Patient021A2 | Patient235B  |
| 11553 | Patient032B  | Patient079C  |
| 11553 | Patient034A  | Patient104A  |
| 11553 | Patient045A  | Patient109A  |
| 11553 | Patient045B  | Patient108B1 |
| 11553 | Patient045B  | Patient108B2 |
| 11553 | Patient045C  | Patient108G  |
| 11553 | Patient045C  | Patient109E  |
| 11553 | Patient045D  | Patient103E  |
| 11553 | Patient066E  | Patient189A  |
| 11553 | Patient066E  | Patient189B  |
| 11553 | Patient079A1 | Patient213A  |
| 11553 | Patient079A2 | Patient213A  |
| 11553 | Patient081B  | Patient222B  |
| 11553 | Patient081E  | Patient104A  |
| 11553 | Patient081E  | Patient236B  |
| 11553 | Patient092D  | Patient108F  |
| 11553 | Patient092D  | Patient196A  |
| 11553 | Patient097E  | Patient141D  |
| 11553 | Patient099A  | Patient121A  |
| 11553 | Patient099B  | Patient121A  |
| 11553 | Patient100A  | Patient181B  |
| 11553 | Patient103E  | Patient232D  |
| 11553 | Patient173B  | Patient187   |
| 11553 | Patient173B  | Patient189E  |
| 11553 | Patient235C  | Patient246B  |
| 11554 | Patient021A1 | Patient235B  |
| 11554 | Patient023   | Patient150C  |
| 11554 | Patient032A  | Patient220A  |
| 11554 | Patient032B  | Patient079A1 |
| 11554 | Patient032B  | Patient218B  |
| 11554 | Patient034B  | Patient213B  |
| 11554 | Patient034C  | Patient104A  |

|       |              |              |
|-------|--------------|--------------|
| 11554 | Patient034D  | Patient104B  |
| 11554 | Patient034E  | Patient252D  |
| 11554 | Patient045A  | Patient109B  |
| 11554 | Patient045B  | Patient108G  |
| 11554 | Patient045B  | Patient109E  |
| 11554 | Patient045C  | Patient097B  |
| 11554 | Patient081A1 | Patient252D  |
| 11554 | Patient081A2 | Patient220A  |
| 11554 | Patient092D  | Patient196C  |
| 11554 | Patient092D  | Patient222B  |
| 11554 | Patient126A  | Patient157   |
| 11554 | Patient141D  | Patient236B  |
| 11554 | Patient173B  | Patient189A  |
| 11554 | Patient213B  | Patient261B  |
| 11554 | Patient252D  | Patient261A  |
| 11555 | Patient021A1 | Patient081F  |
| 11555 | Patient021A2 | Patient081B  |
| 11555 | Patient023   | Patient230F  |
| 11555 | Patient032B  | Patient079A2 |
| 11555 | Patient032B  | Patient236B  |
| 11555 | Patient034A  | Patient222B  |
| 11555 | Patient034C  | Patient252D  |
| 11555 | Patient045A  | Patient079C  |
| 11555 | Patient045B  | Patient097B  |
| 11555 | Patient045B  | Patient108H  |
| 11555 | Patient045C  | Patient097C  |
| 11555 | Patient045C  | Patient108H  |
| 11555 | Patient079A1 | Patient141D  |
| 11555 | Patient081A2 | Patient222B  |
| 11555 | Patient092D  | Patient196B  |
| 11555 | Patient092D  | Patient196E  |
| 11555 | Patient092D  | Patient222A  |
| 11555 | Patient092D  | Patient222D  |
| 11555 | Patient100A  | Patient181A  |
| 11555 | Patient103E  | Patient196F  |
| 11555 | Patient104A  | Patient145C  |
| 11555 | Patient121A  | Patient222A  |
| 11555 | Patient121A  | Patient222F  |
| 11555 | Patient121A  | Patient236A  |
| 11555 | Patient123A  | Patient213B  |
| 11555 | Patient213B  | Patient230E  |
| 11555 | Patient224B  | Patient247D  |
| 11555 | Patient235B  | Patient246C  |
| 11556 | Patient023   | Patient230B  |
| 11556 | Patient032B  | Patient252A  |
| 11556 | Patient034E  | Patient104A  |
| 11556 | Patient045B  | Patient097C  |
| 11556 | Patient079A2 | Patient141D  |
| 11556 | Patient081A2 | Patient104B  |
| 11556 | Patient081B  | Patient104B  |

|       |              |              |
|-------|--------------|--------------|
| 11556 | Patient081E  | Patient218A  |
| 11556 | Patient081F  | Patient104A  |
| 11556 | Patient092D  | Patient109B  |
| 11556 | Patient092D  | Patient127A  |
| 11556 | Patient099C  | Patient121A  |
| 11556 | Patient121A  | Patient196A  |
| 11556 | Patient121A  | Patient196C  |
| 11556 | Patient121B  | Patient222A  |
| 11556 | Patient121B  | Patient222F  |
| 11556 | Patient121B  | Patient236A  |
| 11556 | Patient141A  | Patient213B  |
| 11556 | Patient141D  | Patient218B  |
| 11556 | Patient141D  | Patient252A  |
| 11556 | Patient173B  | Patient189B  |
| 11556 | Patient181A  | Patient247D  |
| 11557 | Patient021A1 | Patient081B  |
| 11557 | Patient021A2 | Patient081A2 |
| 11557 | Patient032B  | Patient097D  |
| 11557 | Patient034A  | Patient220A  |
| 11557 | Patient034D  | Patient252D  |
| 11557 | Patient034E  | Patient222B  |
| 11557 | Patient045A  | Patient079A1 |
| 11557 | Patient045A  | Patient108F  |
| 11557 | Patient079B  | Patient230D  |
| 11557 | Patient081F  | Patient236B  |
| 11557 | Patient092D  | Patient108D  |
| 11557 | Patient097D  | Patient141D  |
| 11557 | Patient099A  | Patient121B  |
| 11557 | Patient099B  | Patient121B  |
| 11557 | Patient104B  | Patient261B  |
| 11557 | Patient108A  | Patient141D  |
| 11557 | Patient120D  | Patient232B  |
| 11557 | Patient121A  | Patient222E  |
| 11557 | Patient121A  | Patient265   |
| 11557 | Patient121B  | Patient196A  |
| 11557 | Patient121B  | Patient196C  |
| 11557 | Patient123C  | Patient213B  |
| 11557 | Patient141C  | Patient213B  |
| 11557 | Patient145C  | Patient252D  |
| 11557 | Patient184   | Patient235B  |
| 11557 | Patient201A  | Patient235B  |
| 11557 | Patient220A  | Patient261A  |
| 11557 | Patient235C  | Patient246D  |
| 11558 | Patient032B  | Patient252B  |
| 11558 | Patient034B  | Patient104B  |
| 11558 | Patient034C  | Patient220A  |
| 11558 | Patient034D  | Patient104A  |
| 11558 | Patient045A  | Patient079A2 |
| 11558 | Patient045B  | Patient109D  |
| 11558 | Patient045C  | Patient109D  |

|       |              |              |
|-------|--------------|--------------|
| 11558 | Patient081F  | Patient218A  |
| 11558 | Patient092D  | Patient127B  |
| 11558 | Patient092D  | Patient201E  |
| 11558 | Patient097E  | Patient261A  |
| 11558 | Patient103E  | Patient222C  |
| 11558 | Patient121A  | Patient196B  |
| 11558 | Patient121A  | Patient196E  |
| 11558 | Patient121B  | Patient222E  |
| 11558 | Patient121B  | Patient265   |
| 11558 | Patient141D  | Patient252B  |
| 11558 | Patient173B  | Patient236A  |
| 11558 | Patient181B  | Patient247D  |
| 11559 | Patient021A1 | Patient081A2 |
| 11559 | Patient023   | Patient026A  |
| 11559 | Patient023   | Patient150A  |
| 11559 | Patient023   | Patient230E  |
| 11559 | Patient032A  | Patient097A  |
| 11559 | Patient032B  | Patient108A  |
| 11559 | Patient032B  | Patient187   |
| 11559 | Patient034E  | Patient220A  |
| 11559 | Patient045A  | Patient108D  |
| 11559 | Patient045B  | Patient109A  |
| 11559 | Patient045C  | Patient079C  |
| 11559 | Patient045C  | Patient109A  |
| 11559 | Patient045C  | Patient109B  |
| 11559 | Patient081A1 | Patient220A  |
| 11559 | Patient081B  | Patient104A  |
| 11559 | Patient081B  | Patient218A  |
| 11559 | Patient081B  | Patient236B  |
| 11559 | Patient081E  | Patient099E  |
| 11559 | Patient081F  | Patient099E  |
| 11559 | Patient092D  | Patient149B  |
| 11559 | Patient097A  | Patient261A  |
| 11559 | Patient099B  | Patient173B  |
| 11559 | Patient104B  | Patient123A  |
| 11559 | Patient121A  | Patient201B  |
| 11559 | Patient121B  | Patient196B  |
| 11559 | Patient121B  | Patient196E  |
| 11559 | Patient123B  | Patient213B  |
| 11559 | Patient131   | Patient173A  |
| 11559 | Patient141B  | Patient213B  |
| 11559 | Patient141D  | Patient187   |
| 11559 | Patient173B  | Patient222A  |
| 11559 | Patient173B  | Patient222F  |
| 11559 | Patient213B  | Patient261D  |
| 11559 | Patient222B  | Patient261A  |
| 11559 | Patient235B  | Patient246B  |
| 11560 | Patient032A  | Patient079C  |
| 11560 | Patient032A  | Patient099E  |
| 11560 | Patient032A  | Patient218A  |

|       |              |              |
|-------|--------------|--------------|
| 11560 | Patient032B  | Patient097B  |
| 11560 | Patient034C  | Patient222B  |
| 11560 | Patient034D  | Patient222B  |
| 11560 | Patient045B  | Patient079C  |
| 11560 | Patient045B  | Patient109B  |
| 11560 | Patient081A1 | Patient222B  |
| 11560 | Patient081A2 | Patient104A  |
| 11560 | Patient081A2 | Patient236B  |
| 11560 | Patient081B  | Patient099E  |
| 11560 | Patient081E  | Patient218B  |
| 11560 | Patient092D  | Patient263B  |
| 11560 | Patient099C  | Patient121B  |
| 11560 | Patient099C  | Patient173B  |
| 11560 | Patient099D  | Patient121A  |
| 11560 | Patient103D  | Patient263A  |
| 11560 | Patient121B  | Patient201B  |
| 11560 | Patient121B  | Patient222D  |
| 11560 | Patient145C  | Patient220A  |
| 11560 | Patient157   | Patient224A  |
| 11560 | Patient173B  | Patient222E  |
| 11560 | Patient230A  | Patient252D  |
| 11561 | Patient023   | Patient026F  |
| 11561 | Patient032A  | Patient097E  |
| 11561 | Patient034B  | Patient252D  |
| 11561 | Patient045D  | Patient141B  |
| 11561 | Patient045D  | Patient141C  |
| 11561 | Patient081A1 | Patient104B  |
| 11561 | Patient092D  | Patient201A  |
| 11561 | Patient092G  | Patient213B  |
| 11561 | Patient097B  | Patient141D  |
| 11561 | Patient099A  | Patient173B  |
| 11561 | Patient104A  | Patient261B  |
| 11561 | Patient104B  | Patient230A  |
| 11561 | Patient104B  | Patient261D  |
| 11561 | Patient145C  | Patient222B  |
| 11561 | Patient173B  | Patient196A  |
| 11561 | Patient173B  | Patient196C  |
| 11561 | Patient213B  | Patient230F  |
| 11561 | Patient218A  | Patient261A  |
| 11561 | Patient235C  | Patient246E  |
| 11561 | Patient252D  | Patient261B  |
| 11562 | Patient021A2 | Patient081A1 |
| 11562 | Patient026F  | Patient213B  |
| 11562 | Patient032B  | Patient097C  |
| 11562 | Patient032B  | Patient252F  |
| 11562 | Patient034A  | Patient097A  |
| 11562 | Patient034A  | Patient099E  |
| 11562 | Patient034B  | Patient104A  |
| 11562 | Patient034D  | Patient220A  |
| 11562 | Patient045C  | Patient079A1 |

|       |              |              |
|-------|--------------|--------------|
| 11562 | Patient045C  | Patient108F  |
| 11562 | Patient045D  | Patient235C  |
| 11562 | Patient081A2 | Patient218A  |
| 11562 | Patient081E  | Patient187   |
| 11562 | Patient092D  | Patient201B  |
| 11562 | Patient097C  | Patient141D  |
| 11562 | Patient103A  | Patient247D  |
| 11562 | Patient104B  | Patient123C  |
| 11562 | Patient108A  | Patient150C  |
| 11562 | Patient108G  | Patient141D  |
| 11562 | Patient109C  | Patient141D  |
| 11562 | Patient141C  | Patient252D  |
| 11562 | Patient173B  | Patient201B  |
| 11562 | Patient173B  | Patient265   |
| 11563 | Patient032A  | Patient079A1 |
| 11563 | Patient032A  | Patient097D  |
| 11563 | Patient032A  | Patient236B  |
| 11563 | Patient032B  | Patient108G  |
| 11563 | Patient032B  | Patient109C  |
| 11563 | Patient034A  | Patient097E  |
| 11563 | Patient034A  | Patient218A  |
| 11563 | Patient045B  | Patient079A1 |
| 11563 | Patient045B  | Patient108F  |
| 11563 | Patient045C  | Patient079A2 |
| 11563 | Patient081A2 | Patient099E  |
| 11563 | Patient081F  | Patient218B  |
| 11563 | Patient104A  | Patient123A  |
| 11563 | Patient104B  | Patient230E  |
| 11563 | Patient120A  | Patient246A  |
| 11563 | Patient121A  | Patient201E  |
| 11563 | Patient141D  | Patient252F  |
| 11563 | Patient173B  | Patient196B  |
| 11563 | Patient173B  | Patient196E  |
| 11563 | Patient222B  | Patient230A  |
| 11563 | Patient230E  | Patient252D  |
| 11563 | Patient235B  | Patient246D  |
| 11564 | Patient021A1 | Patient081A1 |
| 11564 | Patient021A2 | Patient192A  |
| 11564 | Patient021A2 | Patient192C  |
| 11564 | Patient032A  | Patient079A2 |
| 11564 | Patient032B  | Patient079B  |
| 11564 | Patient032B  | Patient099B  |
| 11564 | Patient032B  | Patient108H  |
| 11564 | Patient032B  | Patient109E  |
| 11564 | Patient032B  | Patient196A  |
| 11564 | Patient032B  | Patient196C  |
| 11564 | Patient032B  | Patient222F  |
| 11564 | Patient032B  | Patient236A  |
| 11564 | Patient034A  | Patient079C  |
| 11564 | Patient034C  | Patient097E  |



|       |              |              |
|-------|--------------|--------------|
| 11564 | Patient034E  | Patient097A  |
| 11564 | Patient034E  | Patient099E  |
| 11564 | Patient034E  | Patient218A  |
| 11564 | Patient045B  | Patient079A2 |
| 11564 | Patient045C  | Patient108D  |
| 11564 | Patient079B  | Patient141D  |
| 11564 | Patient079B  | Patient213A  |
| 11564 | Patient081F  | Patient187   |
| 11564 | Patient092D  | Patient196D  |
| 11564 | Patient092G  | Patient104B  |
| 11564 | Patient099D  | Patient121B  |
| 11564 | Patient099D  | Patient173B  |
| 11564 | Patient104B  | Patient123B  |
| 11564 | Patient108B1 | Patient150C  |
| 11564 | Patient108B2 | Patient150C  |
| 11564 | Patient108H  | Patient141D  |
| 11564 | Patient121A  | Patient127A  |
| 11564 | Patient121B  | Patient201E  |
| 11564 | Patient123A  | Patient252D  |
| 11564 | Patient141A  | Patient252D  |
| 11564 | Patient141B  | Patient252D  |
| 11564 | Patient213B  | Patient230B  |
| 11564 | Patient218B  | Patient261A  |
| 11565 | Patient023   | Patient026B  |
| 11565 | Patient026F  | Patient104B  |
| 11565 | Patient032A  | Patient218B  |
| 11565 | Patient032A  | Patient252A  |
| 11565 | Patient032B  | Patient099A  |
| 11565 | Patient032B  | Patient099C  |
| 11565 | Patient032B  | Patient222A  |
| 11565 | Patient034B  | Patient222B  |
| 11565 | Patient034C  | Patient079C  |
| 11565 | Patient034C  | Patient097A  |
| 11565 | Patient034E  | Patient079C  |
| 11565 | Patient034E  | Patient097E  |
| 11565 | Patient045B  | Patient108D  |
| 11565 | Patient066D  | Patient213B  |
| 11565 | Patient081A1 | Patient104A  |
| 11565 | Patient081A1 | Patient236B  |
| 11565 | Patient081B  | Patient218B  |
| 11565 | Patient081E  | Patient236A  |
| 11565 | Patient092D  | Patient184   |
| 11565 | Patient092G  | Patient252D  |
| 11565 | Patient099E  | Patient261A  |
| 11565 | Patient104A  | Patient230A  |
| 11565 | Patient104A  | Patient261D  |
| 11565 | Patient104B  | Patient141A  |
| 11565 | Patient104B  | Patient141C  |
| 11565 | Patient109E  | Patient141D  |
| 11565 | Patient120D  | Patient232A  |

|       |              |              |
|-------|--------------|--------------|
| 11565 | Patient120D  | Patient232C  |
| 11565 | Patient121A  | Patient127B  |
| 11565 | Patient121A  | Patient189E  |
| 11565 | Patient121B  | Patient127A  |
| 11565 | Patient141D  | Patient222A  |
| 11565 | Patient141D  | Patient236A  |
| 11565 | Patient145A  | Patient213B  |
| 11565 | Patient252D  | Patient261D  |
| 11566 | Patient026B  | Patient213B  |
| 11566 | Patient032A  | Patient108A  |
| 11566 | Patient032A  | Patient187   |
| 11566 | Patient032B  | Patient196B  |
| 11566 | Patient032B  | Patient196E  |
| 11566 | Patient032B  | Patient222E  |
| 11566 | Patient034A  | Patient079A1 |
| 11566 | Patient034A  | Patient236B  |
| 11566 | Patient034B  | Patient220A  |
| 11566 | Patient045D  | Patient141A  |
| 11566 | Patient045D  | Patient235B  |
| 11566 | Patient066E  | Patient213B  |
| 11566 | Patient066F  | Patient213B  |
| 11566 | Patient081B  | Patient187   |
| 11566 | Patient097D  | Patient261A  |
| 11566 | Patient097E  | Patient145C  |
| 11566 | Patient099B  | Patient141D  |
| 11566 | Patient099E  | Patient145C  |
| 11566 | Patient103E  | Patient263A  |
| 11566 | Patient104A  | Patient123C  |
| 11566 | Patient109C  | Patient150C  |
| 11566 | Patient120D  | Patient232E  |
| 11566 | Patient121A  | Patient189A  |
| 11566 | Patient121B  | Patient127B  |
| 11566 | Patient121B  | Patient189E  |
| 11566 | Patient127A  | Patient173B  |
| 11566 | Patient141C  | Patient222B  |
| 11566 | Patient141D  | Patient196A  |
| 11566 | Patient141D  | Patient196C  |
| 11566 | Patient173B  | Patient201E  |
| 11566 | Patient220A  | Patient230A  |
| 11566 | Patient222B  | Patient261B  |
| 11566 | Patient236B  | Patient261A  |
| 11567 | Patient021A1 | Patient192A  |
| 11567 | Patient021A1 | Patient192C  |
| 11567 | Patient021A2 | Patient192B  |
| 11567 | Patient026A  | Patient213B  |
| 11567 | Patient026B  | Patient104B  |
| 11567 | Patient032B  | Patient265   |
| 11567 | Patient034A  | Patient079A2 |
| 11567 | Patient034A  | Patient218B  |
| 11567 | Patient034C  | Patient079A1 |

|       |              |              |
|-------|--------------|--------------|
| 11567 | Patient034C  | Patient099E  |
| 11567 | Patient034C  | Patient236B  |
| 11567 | Patient034D  | Patient097A  |
| 11567 | Patient034D  | Patient099E  |
| 11567 | Patient045A  | Patient079B  |
| 11567 | Patient074C  | Patient126E  |
| 11567 | Patient079C  | Patient145C  |
| 11567 | Patient081A1 | Patient218A  |
| 11567 | Patient081A2 | Patient218B  |
| 11567 | Patient092D  | Patient247E  |
| 11567 | Patient097A  | Patient145C  |
| 11567 | Patient097A  | Patient261B  |
| 11567 | Patient097B  | Patient261A  |
| 11567 | Patient099A  | Patient141D  |
| 11567 | Patient099C  | Patient141D  |
| 11567 | Patient103D  | Patient146   |
| 11567 | Patient104A  | Patient141A  |
| 11567 | Patient104A  | Patient141C  |
| 11567 | Patient104A  | Patient230E  |
| 11567 | Patient104B  | Patient141B  |
| 11567 | Patient108A  | Patient150A  |
| 11567 | Patient120B  | Patient232B  |
| 11567 | Patient121A  | Patient149B  |
| 11567 | Patient121A  | Patient189B  |
| 11567 | Patient121A  | Patient201A  |
| 11567 | Patient121A  | Patient247E  |
| 11567 | Patient121B  | Patient189A  |
| 11567 | Patient123C  | Patient252D  |
| 11567 | Patient123D  | Patient213B  |
| 11567 | Patient127B  | Patient173B  |
| 11567 | Patient131   | Patient195   |
| 11567 | Patient145C  | Patient236B  |
| 11567 | Patient213A  | Patient252A  |
| 11567 | Patient220A  | Patient261B  |
| 11567 | Patient235B  | Patient246E  |
| 11568 | Patient032A  | Patient252B  |
| 11568 | Patient032B  | Patient109D  |
| 11568 | Patient034A  | Patient097D  |
| 11568 | Patient034A  | Patient252A  |
| 11568 | Patient034C  | Patient079A2 |
| 11568 | Patient034C  | Patient218A  |
| 11568 | Patient034C  | Patient218B  |
| 11568 | Patient034D  | Patient079C  |
| 11568 | Patient034D  | Patient097E  |
| 11568 | Patient034D  | Patient218A  |
| 11568 | Patient034E  | Patient079A1 |
| 11568 | Patient034E  | Patient218B  |
| 11568 | Patient034E  | Patient236B  |
| 11568 | Patient045D  | Patient081F  |
| 11568 | Patient066D  | Patient104B  |

|       |              |              |
|-------|--------------|--------------|
| 11568 | Patient066F  | Patient104B  |
| 11568 | Patient074B  | Patient126E  |
| 11568 | Patient081A1 | Patient099E  |
| 11568 | Patient081A2 | Patient187   |
| 11568 | Patient081E  | Patient265   |
| 11568 | Patient092G  | Patient104A  |
| 11568 | Patient097C  | Patient261A  |
| 11568 | Patient097E  | Patient261B  |
| 11568 | Patient103C  | Patient157   |
| 11568 | Patient104A  | Patient123B  |
| 11568 | Patient108A  | Patient261A  |
| 11568 | Patient108G  | Patient150C  |
| 11568 | Patient109D  | Patient141D  |
| 11568 | Patient121B  | Patient149B  |
| 11568 | Patient121B  | Patient189B  |
| 11568 | Patient121B  | Patient196D  |
| 11568 | Patient121B  | Patient201A  |
| 11568 | Patient121B  | Patient247E  |
| 11568 | Patient123A  | Patient220A  |
| 11568 | Patient141B  | Patient222B  |
| 11568 | Patient141C  | Patient220A  |
| 11568 | Patient141D  | Patient196B  |
| 11568 | Patient141D  | Patient196E  |
| 11568 | Patient141D  | Patient201B  |
| 11568 | Patient141D  | Patient222F  |
| 11568 | Patient141D  | Patient265   |
| 11568 | Patient187   | Patient261A  |
| 11568 | Patient220A  | Patient230E  |
| 11568 | Patient230F  | Patient252D  |
| 11569 | Patient021A1 | Patient192B  |
| 11569 | Patient023   | Patient150B  |
| 11569 | Patient026F  | Patient104A  |
| 11569 | Patient032A  | Patient097B  |
| 11569 | Patient032B  | Patient099D  |
| 11569 | Patient032B  | Patient109A  |
| 11569 | Patient032B  | Patient222D  |
| 11569 | Patient034A  | Patient108A  |
| 11569 | Patient034C  | Patient252A  |
| 11569 | Patient034E  | Patient079A2 |
| 11569 | Patient034E  | Patient097D  |
| 11569 | Patient045D  | Patient081E  |
| 11569 | Patient066E  | Patient104B  |
| 11569 | Patient074A  | Patient126E  |
| 11569 | Patient074D  | Patient126E  |
| 11569 | Patient079A1 | Patient145C  |
| 11569 | Patient081B  | Patient236A  |
| 11569 | Patient081E  | Patient099B  |
| 11569 | Patient081E  | Patient196A  |
| 11569 | Patient081E  | Patient196C  |
| 11569 | Patient081E  | Patient222A  |

|       |              |             |
|-------|--------------|-------------|
| 11569 | Patient081E  | Patient222F |
| 11569 | Patient081F  | Patient236A |
| 11569 | Patient099E  | Patient230A |
| 11569 | Patient104A  | Patient141B |
| 11569 | Patient108B1 | Patient150A |
| 11569 | Patient108B2 | Patient150A |
| 11569 | Patient109E  | Patient150C |
| 11569 | Patient123B  | Patient252D |
| 11569 | Patient131   | Patient235C |
| 11569 | Patient141A  | Patient220A |
| 11569 | Patient141D  | Patient222E |
| 11569 | Patient145C  | Patient218A |
| 11569 | Patient173B  | Patient247E |
| 11569 | Patient218A  | Patient230A |
| 11569 | Patient222B  | Patient230E |
| 11570 | Patient032A  | Patient097C |
| 11570 | Patient032B  | Patient108F |
| 11570 | Patient034A  | Patient252B |
| 11570 | Patient034C  | Patient097D |
| 11570 | Patient034E  | Patient252A |
| 11570 | Patient079A1 | Patient261A |
| 11570 | Patient079A2 | Patient145C |
| 11570 | Patient079C  | Patient261A |
| 11570 | Patient081E  | Patient099A |
| 11570 | Patient081E  | Patient099C |
| 11570 | Patient081E  | Patient222E |
| 11570 | Patient092G  | Patient159  |
| 11570 | Patient103B  | Patient157  |
| 11570 | Patient104B  | Patient145A |
| 11570 | Patient104B  | Patient230F |
| 11570 | Patient108F  | Patient141D |
| 11570 | Patient108H  | Patient150C |
| 11570 | Patient121A  | Patient184  |
| 11570 | Patient141A  | Patient222B |
| 11570 | Patient141D  | Patient222D |
| 11570 | Patient149B  | Patient173B |
| 11570 | Patient157   | Patient192C |
| 11570 | Patient173B  | Patient201A |
| 11570 | Patient218A  | Patient261B |
| 11570 | Patient230A  | Patient236B |
| 11571 | Patient026A  | Patient104B |
| 11571 | Patient026B  | Patient104A |
| 11571 | Patient026F  | Patient252D |
| 11571 | Patient032A  | Patient108G |
| 11571 | Patient032A  | Patient252F |
| 11571 | Patient032B  | Patient109B |
| 11571 | Patient034A  | Patient187  |
| 11571 | Patient034B  | Patient097A |
| 11571 | Patient034B  | Patient099E |
| 11571 | Patient034C  | Patient252B |

|       |              |              |
|-------|--------------|--------------|
| 11571 | Patient034D  | Patient079A1 |
| 11571 | Patient034D  | Patient236B  |
| 11571 | Patient034E  | Patient108A  |
| 11571 | Patient066D  | Patient252D  |
| 11571 | Patient074E  | Patient126E  |
| 11571 | Patient079A2 | Patient261A  |
| 11571 | Patient081E  | Patient196B  |
| 11571 | Patient081E  | Patient196E  |
| 11571 | Patient081E  | Patient201B  |
| 11571 | Patient081F  | Patient222F  |
| 11571 | Patient081F  | Patient265   |
| 11571 | Patient097A  | Patient261D  |
| 11571 | Patient097E  | Patient213A  |
| 11571 | Patient104B  | Patient123D  |
| 11571 | Patient108B1 | Patient213A  |
| 11571 | Patient108B2 | Patient213A  |
| 11571 | Patient108G  | Patient261A  |
| 11571 | Patient109A  | Patient141D  |
| 11571 | Patient109B  | Patient141D  |
| 11571 | Patient109C  | Patient150A  |
| 11571 | Patient109C  | Patient261A  |
| 11571 | Patient120C  | Patient232B  |
| 11571 | Patient121A  | Patient263B  |
| 11571 | Patient121B  | Patient184   |
| 11571 | Patient121B  | Patient246A  |
| 11571 | Patient121B  | Patient246C  |
| 11571 | Patient123C  | Patient220A  |
| 11571 | Patient141B  | Patient220A  |
| 11571 | Patient157   | Patient192A  |
| 11571 | Patient213A  | Patient252B  |
| 11571 | Patient220A  | Patient261D  |
| 11571 | Patient222B  | Patient261D  |
| 11571 | Patient230B  | Patient252D  |
| 11572 | Patient021A2 | Patient173B  |
| 11572 | Patient021A2 | Patient192E  |
| 11572 | Patient026B  | Patient252D  |
| 11572 | Patient032A  | Patient109C  |
| 11572 | Patient032A  | Patient236A  |
| 11572 | Patient032B  | Patient127A  |
| 11572 | Patient032B  | Patient201B  |
| 11572 | Patient034A  | Patient097B  |
| 11572 | Patient034B  | Patient079C  |
| 11572 | Patient034B  | Patient097E  |
| 11572 | Patient034B  | Patient218A  |
| 11572 | Patient034C  | Patient108A  |
| 11572 | Patient034C  | Patient187   |
| 11572 | Patient034D  | Patient079A2 |
| 11572 | Patient034D  | Patient097D  |
| 11572 | Patient034D  | Patient218B  |
| 11572 | Patient034E  | Patient187   |

|       |              |             |
|-------|--------------|-------------|
| 11572 | Patient034E  | Patient252B |
| 11572 | Patient045C  | Patient079B |
| 11572 | Patient045D  | Patient081B |
| 11572 | Patient066D  | Patient104A |
| 11572 | Patient066E  | Patient252D |
| 11572 | Patient066F  | Patient104A |
| 11572 | Patient066F  | Patient252D |
| 11572 | Patient079C  | Patient123A |
| 11572 | Patient081A1 | Patient218B |
| 11572 | Patient081A2 | Patient236A |
| 11572 | Patient081B  | Patient222F |
| 11572 | Patient081F  | Patient099B |
| 11572 | Patient081F  | Patient196A |
| 11572 | Patient081F  | Patient196C |
| 11572 | Patient081F  | Patient222A |
| 11572 | Patient092D  | Patient247A |
| 11572 | Patient097A  | Patient213A |
| 11572 | Patient097D  | Patient261B |
| 11572 | Patient097E  | Patient261D |
| 11572 | Patient099D  | Patient141D |
| 11572 | Patient099E  | Patient123A |
| 11572 | Patient099E  | Patient141C |
| 11572 | Patient099E  | Patient261B |
| 11572 | Patient104B  | Patient230B |
| 11572 | Patient108A  | Patient213A |
| 11572 | Patient108H  | Patient261A |
| 11572 | Patient109D  | Patient150C |
| 11572 | Patient109E  | Patient261A |
| 11572 | Patient120A  | Patient247A |
| 11572 | Patient120D  | Patient232D |
| 11572 | Patient121B  | Patient263B |
| 11572 | Patient126A  | Patient247D |
| 11572 | Patient126C  | Patient247D |
| 11572 | Patient127B  | Patient141D |
| 11572 | Patient141C  | Patient218A |
| 11572 | Patient157   | Patient195  |
| 11572 | Patient218A  | Patient230E |
| 11572 | Patient222B  | Patient230F |
| 11573 | Patient021A1 | Patient173B |
| 11573 | Patient026F  | Patient220A |
| 11573 | Patient032A  | Patient079B |
| 11573 | Patient032A  | Patient099B |
| 11573 | Patient032A  | Patient109E |
| 11573 | Patient032A  | Patient196A |
| 11573 | Patient032A  | Patient196C |
| 11573 | Patient032A  | Patient222F |
| 11573 | Patient032B  | Patient127B |
| 11573 | Patient032B  | Patient201E |
| 11573 | Patient034C  | Patient097B |
| 11573 | Patient034D  | Patient252A |

|       |              |             |
|-------|--------------|-------------|
| 11573 | Patient045B  | Patient079B |
| 11573 | Patient066E  | Patient104A |
| 11573 | Patient081A1 | Patient187  |
| 11573 | Patient081B  | Patient099B |
| 11573 | Patient081B  | Patient196A |
| 11573 | Patient081B  | Patient265  |
| 11573 | Patient081E  | Patient222D |
| 11573 | Patient081F  | Patient099A |
| 11573 | Patient081F  | Patient099C |
| 11573 | Patient081F  | Patient222E |
| 11573 | Patient097A  | Patient123A |
| 11573 | Patient097D  | Patient145C |
| 11573 | Patient097E  | Patient123A |
| 11573 | Patient099E  | Patient230E |
| 11573 | Patient108A  | Patient145C |
| 11573 | Patient108G  | Patient150A |
| 11573 | Patient120A  | Patient247C |
| 11573 | Patient123B  | Patient220A |
| 11573 | Patient127A  | Patient141D |
| 11573 | Patient141C  | Patient236B |
| 11573 | Patient141D  | Patient247E |
| 11573 | Patient145A  | Patient252D |
| 11573 | Patient145C  | Patient218B |
| 11573 | Patient157   | Patient192B |
| 11573 | Patient173B  | Patient263B |
| 11573 | Patient218B  | Patient230A |
| 11574 | Patient021A2 | Patient230A |
| 11574 | Patient032A  | Patient099A |
| 11574 | Patient032A  | Patient099C |
| 11574 | Patient032A  | Patient108H |
| 11574 | Patient032A  | Patient222A |
| 11574 | Patient032B  | Patient108D |
| 11574 | Patient032B  | Patient246A |
| 11574 | Patient034A  | Patient097C |
| 11574 | Patient034A  | Patient108G |
| 11574 | Patient034A  | Patient252F |
| 11574 | Patient034C  | Patient097C |
| 11574 | Patient034D  | Patient108A |
| 11574 | Patient034E  | Patient097B |
| 11574 | Patient081B  | Patient099A |
| 11574 | Patient081B  | Patient099C |
| 11574 | Patient081B  | Patient196C |
| 11574 | Patient081E  | Patient127A |
| 11574 | Patient081F  | Patient196B |
| 11574 | Patient081F  | Patient196E |
| 11574 | Patient092D  | Patient247B |
| 11574 | Patient092G  | Patient220A |
| 11574 | Patient099E  | Patient123C |
| 11574 | Patient100A  | Patient103D |
| 11574 | Patient104A  | Patient145A |



|       |              |              |
|-------|--------------|--------------|
| 11574 | Patient104A  | Patient230F  |
| 11574 | Patient108D  | Patient141D  |
| 11574 | Patient109A  | Patient150C  |
| 11574 | Patient109C  | Patient213A  |
| 11574 | Patient109E  | Patient150A  |
| 11574 | Patient120A  | Patient247B  |
| 11574 | Patient141B  | Patient218A  |
| 11574 | Patient145C  | Patient187   |
| 11574 | Patient173A  | Patient246A  |
| 11574 | Patient218B  | Patient261B  |
| 11574 | Patient222B  | Patient230B  |
| 11575 | Patient021A1 | Patient192E  |
| 11575 | Patient026A  | Patient104A  |
| 11575 | Patient026A  | Patient252D  |
| 11575 | Patient032A  | Patient196B  |
| 11575 | Patient032A  | Patient196E  |
| 11575 | Patient032B  | Patient196D  |
| 11575 | Patient034A  | Patient109C  |
| 11575 | Patient034A  | Patient236A  |
| 11575 | Patient034B  | Patient079A1 |
| 11575 | Patient034B  | Patient236B  |
| 11575 | Patient034C  | Patient252F  |
| 11575 | Patient034D  | Patient187   |
| 11575 | Patient034D  | Patient252B  |
| 11575 | Patient034E  | Patient097C  |
| 11575 | Patient045D  | Patient081A2 |
| 11575 | Patient066D  | Patient222B  |
| 11575 | Patient066F  | Patient222B  |
| 11575 | Patient079A1 | Patient123A  |
| 11575 | Patient079C  | Patient123C  |
| 11575 | Patient081A2 | Patient222F  |
| 11575 | Patient081A2 | Patient265   |
| 11575 | Patient081B  | Patient196B  |
| 11575 | Patient081B  | Patient196E  |
| 11575 | Patient081B  | Patient222A  |
| 11575 | Patient081B  | Patient222E  |
| 11575 | Patient081E  | Patient099D  |
| 11575 | Patient081E  | Patient127B  |
| 11575 | Patient081E  | Patient247E  |
| 11575 | Patient081F  | Patient201B  |
| 11575 | Patient081F  | Patient222D  |
| 11575 | Patient081F  | Patient247E  |
| 11575 | Patient092D  | Patient246C  |
| 11575 | Patient092D  | Patient247C  |
| 11575 | Patient099E  | Patient141B  |
| 11575 | Patient103E  | Patient146   |
| 11575 | Patient104A  | Patient123D  |
| 11575 | Patient108A  | Patient261B  |
| 11575 | Patient108H  | Patient150A  |
| 11575 | Patient109C  | Patient145C  |

|       |              |              |
|-------|--------------|--------------|
| 11575 | Patient123A  | Patient236B  |
| 11575 | Patient131   | Patient235B  |
| 11575 | Patient141A  | Patient236B  |
| 11575 | Patient141D  | Patient201E  |
| 11575 | Patient159   | Patient192A  |
| 11575 | Patient173B  | Patient184   |
| 11575 | Patient187   | Patient230A  |
| 11575 | Patient187   | Patient261B  |
| 11575 | Patient213A  | Patient252F  |
| 11575 | Patient218A  | Patient261D  |
| 11575 | Patient218B  | Patient230E  |
| 11575 | Patient220A  | Patient230F  |
| 11575 | Patient230E  | Patient236B  |
| 11575 | Patient236A  | Patient261A  |
| 11575 | Patient236B  | Patient261B  |
| 11576 | Patient021A1 | Patient230A  |
| 11576 | Patient023   | Patient066D  |
| 11576 | Patient023   | Patient066F  |
| 11576 | Patient023   | Patient126C  |
| 11576 | Patient032A  | Patient222E  |
| 11576 | Patient032A  | Patient265   |
| 11576 | Patient032B  | Patient149B  |
| 11576 | Patient032B  | Patient201A  |
| 11576 | Patient034A  | Patient079B  |
| 11576 | Patient034A  | Patient099B  |
| 11576 | Patient034A  | Patient108H  |
| 11576 | Patient034A  | Patient109E  |
| 11576 | Patient034A  | Patient196C  |
| 11576 | Patient034B  | Patient079A2 |
| 11576 | Patient034B  | Patient097D  |
| 11576 | Patient034B  | Patient218B  |
| 11576 | Patient034C  | Patient108G  |
| 11576 | Patient034C  | Patient109C  |
| 11576 | Patient034C  | Patient236A  |
| 11576 | Patient034E  | Patient108G  |
| 11576 | Patient034E  | Patient252F  |
| 11576 | Patient045D  | Patient235A  |
| 11576 | Patient079A2 | Patient123A  |
| 11576 | Patient081A2 | Patient196A  |
| 11576 | Patient081E  | Patient201E  |
| 11576 | Patient097A  | Patient123C  |
| 11576 | Patient097B  | Patient145C  |
| 11576 | Patient097D  | Patient261D  |
| 11576 | Patient097E  | Patient123C  |
| 11576 | Patient099B  | Patient261A  |
| 11576 | Patient099E  | Patient123B  |
| 11576 | Patient099E  | Patient261D  |
| 11576 | Patient104A  | Patient230B  |
| 11576 | Patient108B1 | Patient161B  |
| 11576 | Patient108B2 | Patient161B  |

|       |              |             |
|-------|--------------|-------------|
| 11576 | Patient108G  | Patient145C |
| 11576 | Patient109B  | Patient150C |
| 11576 | Patient109D  | Patient261A |
| 11576 | Patient120B  | Patient232A |
| 11576 | Patient120B  | Patient232C |
| 11576 | Patient121B  | Patient246B |
| 11576 | Patient123D  | Patient252D |
| 11576 | Patient141B  | Patient236B |
| 11576 | Patient141D  | Patient196D |
| 11576 | Patient145C  | Patient236A |
| 11576 | Patient222A  | Patient261A |
| 11576 | Patient222F  | Patient261A |
| 11576 | Patient224A  | Patient247D |
| 11576 | Patient252A  | Patient261A |
| 11577 | Patient023   | Patient066E |
| 11577 | Patient032A  | Patient109D |
| 11577 | Patient032A  | Patient222D |
| 11577 | Patient032B  | Patient247E |
| 11577 | Patient034A  | Patient099A |
| 11577 | Patient034A  | Patient099C |
| 11577 | Patient034A  | Patient196A |
| 11577 | Patient034A  | Patient222A |
| 11577 | Patient034A  | Patient222F |
| 11577 | Patient034B  | Patient252A |
| 11577 | Patient034C  | Patient079B |
| 11577 | Patient034C  | Patient099B |
| 11577 | Patient034C  | Patient108H |
| 11577 | Patient034C  | Patient196A |
| 11577 | Patient034C  | Patient196C |
| 11577 | Patient034C  | Patient222F |
| 11577 | Patient034D  | Patient097B |
| 11577 | Patient034E  | Patient109C |
| 11577 | Patient034E  | Patient236A |
| 11577 | Patient066D  | Patient220A |
| 11577 | Patient066E  | Patient222B |
| 11577 | Patient079C  | Patient261B |
| 11577 | Patient081A1 | Patient236A |
| 11577 | Patient081A2 | Patient099B |
| 11577 | Patient081A2 | Patient196C |
| 11577 | Patient081A2 | Patient222A |
| 11577 | Patient081A2 | Patient222E |
| 11577 | Patient081B  | Patient222D |
| 11577 | Patient081B  | Patient247E |
| 11577 | Patient081F  | Patient127A |
| 11577 | Patient092D  | Patient246A |
| 11577 | Patient092G  | Patient099E |
| 11577 | Patient093A  | Patient121A |
| 11577 | Patient097B  | Patient261B |
| 11577 | Patient097C  | Patient145C |
| 11577 | Patient097C  | Patient261B |

|       |              |             |
|-------|--------------|-------------|
| 11577 | Patient099A  | Patient261A |
| 11577 | Patient099C  | Patient261A |
| 11577 | Patient099E  | Patient141A |
| 11577 | Patient108A  | Patient150B |
| 11577 | Patient108F  | Patient150C |
| 11577 | Patient109A  | Patient261A |
| 11577 | Patient109D  | Patient150A |
| 11577 | Patient109E  | Patient145C |
| 11577 | Patient109E  | Patient213A |
| 11577 | Patient120B  | Patient232E |
| 11577 | Patient141A  | Patient218A |
| 11577 | Patient141A  | Patient218B |
| 11577 | Patient141C  | Patient218B |
| 11577 | Patient141D  | Patient149B |
| 11577 | Patient141D  | Patient201A |
| 11577 | Patient145C  | Patient252A |
| 11577 | Patient159   | Patient192C |
| 11577 | Patient196A  | Patient261A |
| 11577 | Patient196C  | Patient261A |
| 11577 | Patient222E  | Patient261A |
| 11578 | Patient021A2 | Patient230E |
| 11578 | Patient026B  | Patient220A |
| 11578 | Patient032A  | Patient109A |
| 11578 | Patient032A  | Patient201B |
| 11578 | Patient032B  | Patient263B |
| 11578 | Patient034A  | Patient196B |
| 11578 | Patient034A  | Patient196E |
| 11578 | Patient034A  | Patient222E |
| 11578 | Patient034B  | Patient108A |
| 11578 | Patient034C  | Patient099A |
| 11578 | Patient034C  | Patient099C |
| 11578 | Patient034D  | Patient097C |
| 11578 | Patient034E  | Patient079B |
| 11578 | Patient034E  | Patient099B |
| 11578 | Patient034E  | Patient108H |
| 11578 | Patient034E  | Patient109E |
| 11578 | Patient034E  | Patient196A |
| 11578 | Patient034E  | Patient196C |
| 11578 | Patient045D  | Patient230A |
| 11578 | Patient066E  | Patient220A |
| 11578 | Patient066F  | Patient220A |
| 11578 | Patient079A1 | Patient123C |
| 11578 | Patient081A2 | Patient099A |
| 11578 | Patient081A2 | Patient099C |
| 11578 | Patient081A2 | Patient196B |
| 11578 | Patient081A2 | Patient196E |
| 11578 | Patient081A2 | Patient201B |
| 11578 | Patient081B  | Patient127A |
| 11578 | Patient081B  | Patient201B |
| 11578 | Patient081F  | Patient099D |

|       |              |              |
|-------|--------------|--------------|
| 11578 | Patient081F  | Patient127B  |
| 11578 | Patient097A  | Patient123B  |
| 11578 | Patient097D  | Patient123A  |
| 11578 | Patient097E  | Patient123B  |
| 11578 | Patient099B  | Patient145C  |
| 11578 | Patient108B1 | Patient126C  |
| 11578 | Patient108B2 | Patient126C  |
| 11578 | Patient108F  | Patient261A  |
| 11578 | Patient108G  | Patient213A  |
| 11578 | Patient108H  | Patient145C  |
| 11578 | Patient123A  | Patient218A  |
| 11578 | Patient141B  | Patient218B  |
| 11578 | Patient141D  | Patient246A  |
| 11578 | Patient145A  | Patient222B  |
| 11578 | Patient157   | Patient192E  |
| 11578 | Patient187   | Patient230E  |
| 11578 | Patient218A  | Patient230F  |
| 11578 | Patient218B  | Patient261D  |
| 11578 | Patient220A  | Patient230B  |
| 11578 | Patient252B  | Patient261A  |
| 11578 | Patient261A  | Patient265   |
| 11579 | Patient021A2 | Patient141A  |
| 11579 | Patient021A2 | Patient141C  |
| 11579 | Patient032A  | Patient099D  |
| 11579 | Patient032A  | Patient108F  |
| 11579 | Patient032B  | Patient246C  |
| 11579 | Patient034A  | Patient265   |
| 11579 | Patient034B  | Patient187   |
| 11579 | Patient034B  | Patient252B  |
| 11579 | Patient034C  | Patient109E  |
| 11579 | Patient034C  | Patient196B  |
| 11579 | Patient034C  | Patient196E  |
| 11579 | Patient034C  | Patient222A  |
| 11579 | Patient034C  | Patient222E  |
| 11579 | Patient034D  | Patient108G  |
| 11579 | Patient034D  | Patient252F  |
| 11579 | Patient034E  | Patient099A  |
| 11579 | Patient034E  | Patient099C  |
| 11579 | Patient034E  | Patient222A  |
| 11579 | Patient034E  | Patient222F  |
| 11579 | Patient045D  | Patient081A1 |
| 11579 | Patient079A2 | Patient123C  |
| 11579 | Patient079B  | Patient145C  |
| 11579 | Patient079B  | Patient261A  |
| 11579 | Patient079C  | Patient092G  |
| 11579 | Patient079C  | Patient123B  |
| 11579 | Patient081A2 | Patient222D  |
| 11579 | Patient081A2 | Patient247E  |
| 11579 | Patient081B  | Patient099D  |
| 11579 | Patient081B  | Patient127B  |

|       |              |             |
|-------|--------------|-------------|
| 11579 | Patient081E  | Patient149B |
| 11579 | Patient081E  | Patient184  |
| 11579 | Patient081E  | Patient246A |
| 11579 | Patient081E  | Patient246C |
| 11579 | Patient093D  | Patient121A |
| 11579 | Patient093E  | Patient121A |
| 11579 | Patient094B  | Patient121A |
| 11579 | Patient099A  | Patient145C |
| 11579 | Patient099C  | Patient145C |
| 11579 | Patient099E  | Patient230F |
| 11579 | Patient108A  | Patient161B |
| 11579 | Patient108A  | Patient261D |
| 11579 | Patient108B1 | Patient150B |
| 11579 | Patient108B2 | Patient150B |
| 11579 | Patient108H  | Patient213A |
| 11579 | Patient109A  | Patient150A |
| 11579 | Patient109B  | Patient261A |
| 11579 | Patient109C  | Patient161B |
| 11579 | Patient109D  | Patient213A |
| 11579 | Patient123A  | Patient222B |
| 11579 | Patient123C  | Patient236B |
| 11579 | Patient141C  | Patient187  |
| 11579 | Patient141D  | Patient246C |
| 11579 | Patient145A  | Patient220A |
| 11579 | Patient145C  | Patient252B |
| 11579 | Patient187   | Patient261D |
| 11579 | Patient196B  | Patient261A |
| 11579 | Patient196E  | Patient261A |
| 11579 | Patient236B  | Patient261D |
| 11580 | Patient021A1 | Patient230E |
| 11580 | Patient021A2 | Patient141B |
| 11580 | Patient023   | Patient161B |
| 11580 | Patient026F  | Patient099E |
| 11580 | Patient034A  | Patient109D |
| 11580 | Patient034C  | Patient265  |
| 11580 | Patient034D  | Patient109C |
| 11580 | Patient034D  | Patient236A |
| 11580 | Patient034E  | Patient196B |
| 11580 | Patient034E  | Patient196E |
| 11580 | Patient034E  | Patient222E |
| 11580 | Patient079A1 | Patient261B |
| 11580 | Patient081A1 | Patient265  |
| 11580 | Patient081E  | Patient196D |
| 11580 | Patient081E  | Patient201A |
| 11580 | Patient092G  | Patient097A |
| 11580 | Patient092G  | Patient097E |
| 11580 | Patient100A  | Patient103E |
| 11580 | Patient108G  | Patient261B |
| 11580 | Patient109C  | Patient261B |
| 11580 | Patient120C  | Patient232A |

|       |              |             |
|-------|--------------|-------------|
| 11580 | Patient120C  | Patient232C |
| 11580 | Patient121A  | Patient247A |
| 11580 | Patient123B  | Patient236B |
| 11580 | Patient123C  | Patient218A |
| 11580 | Patient123D  | Patient220A |
| 11580 | Patient145C  | Patient222A |
| 11580 | Patient145C  | Patient222F |
| 11580 | Patient218A  | Patient230B |
| 11580 | Patient222D  | Patient261A |
| 11580 | Patient230A  | Patient236A |
| 11580 | Patient230F  | Patient236B |
| 11581 | Patient021A1 | Patient141A |
| 11581 | Patient021A1 | Patient141C |
| 11581 | Patient026A  | Patient220A |
| 11581 | Patient026F  | Patient236B |
| 11581 | Patient032A  | Patient109B |
| 11581 | Patient032A  | Patient127A |
| 11581 | Patient032B  | Patient184  |
| 11581 | Patient034A  | Patient099D |
| 11581 | Patient034A  | Patient201B |
| 11581 | Patient034A  | Patient222D |
| 11581 | Patient034B  | Patient097B |
| 11581 | Patient034C  | Patient109D |
| 11581 | Patient034D  | Patient079B |
| 11581 | Patient034D  | Patient099B |
| 11581 | Patient034D  | Patient108H |
| 11581 | Patient034D  | Patient109E |
| 11581 | Patient034D  | Patient196A |
| 11581 | Patient034D  | Patient196C |
| 11581 | Patient034D  | Patient222F |
| 11581 | Patient034E  | Patient265  |
| 11581 | Patient045D  | Patient230E |
| 11581 | Patient066D  | Patient099E |
| 11581 | Patient066D  | Patient218A |
| 11581 | Patient079A1 | Patient092G |
| 11581 | Patient079A1 | Patient123B |
| 11581 | Patient079A2 | Patient261B |
| 11581 | Patient079C  | Patient261D |
| 11581 | Patient081A1 | Patient099B |
| 11581 | Patient081A1 | Patient196A |
| 11581 | Patient081A1 | Patient196C |
| 11581 | Patient081A1 | Patient222A |
| 11581 | Patient081A1 | Patient222F |
| 11581 | Patient081A2 | Patient127A |
| 11581 | Patient081F  | Patient201E |
| 11581 | Patient092G  | Patient218A |
| 11581 | Patient092G  | Patient252A |
| 11581 | Patient097B  | Patient261D |
| 11581 | Patient097C  | Patient213A |
| 11581 | Patient097C  | Patient261D |

|       |              |             |
|-------|--------------|-------------|
| 11581 | Patient097D  | Patient123C |
| 11581 | Patient099D  | Patient261A |
| 11581 | Patient099E  | Patient230B |
| 11581 | Patient108D  | Patient150C |
| 11581 | Patient108G  | Patient161B |
| 11581 | Patient109B  | Patient150A |
| 11581 | Patient109C  | Patient150B |
| 11581 | Patient109D  | Patient145C |
| 11581 | Patient120C  | Patient232E |
| 11581 | Patient121B  | Patient246D |
| 11581 | Patient121B  | Patient247A |
| 11581 | Patient123A  | Patient218B |
| 11581 | Patient141A  | Patient187  |
| 11581 | Patient141B  | Patient187  |
| 11581 | Patient141D  | Patient246B |
| 11581 | Patient141D  | Patient263B |
| 11581 | Patient145C  | Patient222E |
| 11581 | Patient145C  | Patient265  |
| 11581 | Patient159   | Patient192B |
| 11581 | Patient173B  | Patient247A |
| 11582 | Patient021A1 | Patient141B |
| 11582 | Patient026B  | Patient099E |
| 11582 | Patient026F  | Patient218A |
| 11582 | Patient032A  | Patient127B |
| 11582 | Patient032A  | Patient201E |
| 11582 | Patient034A  | Patient108F |
| 11582 | Patient034A  | Patient109A |
| 11582 | Patient034B  | Patient097C |
| 11582 | Patient034C  | Patient099D |
| 11582 | Patient034C  | Patient109A |
| 11582 | Patient034D  | Patient099A |
| 11582 | Patient034D  | Patient099C |
| 11582 | Patient034D  | Patient222A |
| 11582 | Patient034E  | Patient109D |
| 11582 | Patient034E  | Patient222D |
| 11582 | Patient066E  | Patient099E |
| 11582 | Patient066F  | Patient099E |
| 11582 | Patient066F  | Patient218A |
| 11582 | Patient079A2 | Patient092G |
| 11582 | Patient079A2 | Patient123B |
| 11582 | Patient081A1 | Patient099A |
| 11582 | Patient081A1 | Patient099C |
| 11582 | Patient081A1 | Patient222E |
| 11582 | Patient081A2 | Patient127B |
| 11582 | Patient081B  | Patient201E |
| 11582 | Patient081E  | Patient263B |
| 11582 | Patient081F  | Patient149B |
| 11582 | Patient081F  | Patient184  |
| 11582 | Patient081F  | Patient246A |
| 11582 | Patient081F  | Patient246C |



|       |              |             |
|-------|--------------|-------------|
| 11582 | Patient092D  | Patient246B |
| 11582 | Patient099E  | Patient145A |
| 11582 | Patient108D  | Patient261A |
| 11582 | Patient108F  | Patient150A |
| 11582 | Patient108H  | Patient161B |
| 11582 | Patient108H  | Patient261B |
| 11582 | Patient109E  | Patient261B |
| 11582 | Patient120B  | Patient232D |
| 11582 | Patient121A  | Patient247B |
| 11582 | Patient121A  | Patient247C |
| 11582 | Patient123A  | Patient187  |
| 11582 | Patient123B  | Patient218A |
| 11582 | Patient123C  | Patient222B |
| 11582 | Patient145C  | Patient201B |
| 11582 | Patient201B  | Patient261A |
| 11582 | Patient218B  | Patient230F |
| 11582 | Patient222E  | Patient230A |
| 11582 | Patient252F  | Patient261A |
| 11583 | Patient021A2 | Patient026F |
| 11583 | Patient032A  | Patient246A |
| 11583 | Patient032B  | Patient246B |
| 11583 | Patient034A  | Patient109B |
| 11583 | Patient034B  | Patient108G |
| 11583 | Patient034B  | Patient252F |
| 11583 | Patient034C  | Patient108F |
| 11583 | Patient034C  | Patient201B |
| 11583 | Patient034C  | Patient222D |
| 11583 | Patient034D  | Patient196B |
| 11583 | Patient034D  | Patient196E |
| 11583 | Patient034D  | Patient222E |
| 11583 | Patient034E  | Patient099D |
| 11583 | Patient034E  | Patient109A |
| 11583 | Patient034E  | Patient201B |
| 11583 | Patient066E  | Patient218A |
| 11583 | Patient081A1 | Patient196B |
| 11583 | Patient081A1 | Patient196E |
| 11583 | Patient081A1 | Patient201B |
| 11583 | Patient081A2 | Patient099D |
| 11583 | Patient081B  | Patient246C |
| 11583 | Patient081E  | Patient246B |
| 11583 | Patient081F  | Patient196D |
| 11583 | Patient092G  | Patient236B |
| 11583 | Patient097B  | Patient123A |
| 11583 | Patient099D  | Patient145C |
| 11583 | Patient099E  | Patient123D |
| 11583 | Patient108G  | Patient150B |
| 11583 | Patient109A  | Patient145C |
| 11583 | Patient109E  | Patient161B |
| 11583 | Patient120A  | Patient247E |
| 11583 | Patient121B  | Patient246E |

|       |              |             |
|-------|--------------|-------------|
| 11583 | Patient121B  | Patient247B |
| 11583 | Patient121B  | Patient247C |
| 11583 | Patient127A  | Patient261A |
| 11583 | Patient141D  | Patient184  |
| 11583 | Patient145C  | Patient196A |
| 11583 | Patient145C  | Patient196C |
| 11583 | Patient145C  | Patient222D |
| 11583 | Patient159   | Patient192E |
| 11583 | Patient173A  | Patient247A |
| 11583 | Patient173B  | Patient247B |
| 11583 | Patient173B  | Patient247C |
| 11583 | Patient222A  | Patient230A |
| 11583 | Patient222F  | Patient230A |
| 11583 | Patient230B  | Patient236B |
| 11584 | Patient021A2 | Patient230F |
| 11584 | Patient026F  | Patient218B |
| 11584 | Patient032A  | Patient108D |
| 11584 | Patient032A  | Patient196D |
| 11584 | Patient032A  | Patient247E |
| 11584 | Patient034A  | Patient127A |
| 11584 | Patient034B  | Patient109C |
| 11584 | Patient034B  | Patient236A |
| 11584 | Patient034C  | Patient109B |
| 11584 | Patient034D  | Patient265  |
| 11584 | Patient034E  | Patient108F |
| 11584 | Patient066D  | Patient236B |
| 11584 | Patient079A1 | Patient261D |
| 11584 | Patient079C  | Patient123D |
| 11584 | Patient081A1 | Patient222D |
| 11584 | Patient081A1 | Patient247E |
| 11584 | Patient081A2 | Patient201E |
| 11584 | Patient081B  | Patient149B |
| 11584 | Patient081B  | Patient184  |
| 11584 | Patient081B  | Patient196D |
| 11584 | Patient081B  | Patient246A |
| 11584 | Patient092G  | Patient097D |
| 11584 | Patient092G  | Patient108A |
| 11584 | Patient092G  | Patient218B |
| 11584 | Patient092G  | Patient252B |
| 11584 | Patient094C  | Patient121A |
| 11584 | Patient097D  | Patient123B |
| 11584 | Patient097D  | Patient213A |
| 11584 | Patient099B  | Patient230A |
| 11584 | Patient103C  | Patient247D |
| 11584 | Patient108A  | Patient123A |
| 11584 | Patient108A  | Patient123C |
| 11584 | Patient108F  | Patient145C |
| 11584 | Patient108F  | Patient213A |
| 11584 | Patient108G  | Patient261D |
| 11584 | Patient109B  | Patient145C |

|       |              |             |
|-------|--------------|-------------|
| 11584 | Patient109C  | Patient261D |
| 11584 | Patient109E  | Patient150B |
| 11584 | Patient121A  | Patient246A |
| 11584 | Patient123C  | Patient218B |
| 11584 | Patient127B  | Patient261A |
| 11584 | Patient141C  | Patient236A |
| 11584 | Patient145C  | Patient252F |
| 11584 | Patient187   | Patient230F |
| 11584 | Patient201E  | Patient261A |
| 11584 | Patient236A  | Patient261B |
| 11585 | Patient021A2 | Patient066D |
| 11585 | Patient021A2 | Patient066F |
| 11585 | Patient021A2 | Patient192F |
| 11585 | Patient026A  | Patient099E |
| 11585 | Patient026B  | Patient218A |
| 11585 | Patient034A  | Patient127B |
| 11585 | Patient034A  | Patient201E |
| 11585 | Patient034B  | Patient079B |
| 11585 | Patient034B  | Patient099B |
| 11585 | Patient034B  | Patient108H |
| 11585 | Patient034B  | Patient109E |
| 11585 | Patient034B  | Patient196A |
| 11585 | Patient034B  | Patient196C |
| 11585 | Patient034C  | Patient127A |
| 11585 | Patient034D  | Patient109D |
| 11585 | Patient034D  | Patient222D |
| 11585 | Patient034E  | Patient109B |
| 11585 | Patient066D  | Patient218B |
| 11585 | Patient066F  | Patient218B |
| 11585 | Patient066F  | Patient236B |
| 11585 | Patient079A2 | Patient261D |
| 11585 | Patient079B  | Patient123A |
| 11585 | Patient079C  | Patient145A |
| 11585 | Patient081A2 | Patient149B |
| 11585 | Patient081F  | Patient201A |
| 11585 | Patient081F  | Patient263B |
| 11585 | Patient097A  | Patient123D |
| 11585 | Patient097A  | Patient145A |
| 11585 | Patient097C  | Patient123A |
| 11585 | Patient097E  | Patient123D |
| 11585 | Patient097E  | Patient145A |
| 11585 | Patient099A  | Patient230A |
| 11585 | Patient099B  | Patient123A |
| 11585 | Patient099C  | Patient230A |
| 11585 | Patient108G  | Patient123A |
| 11585 | Patient108H  | Patient150B |
| 11585 | Patient109A  | Patient213A |
| 11585 | Patient109C  | Patient123A |
| 11585 | Patient109D  | Patient161B |
| 11585 | Patient121A  | Patient246C |

|       |              |             |
|-------|--------------|-------------|
| 11585 | Patient123A  | Patient236A |
| 11585 | Patient123B  | Patient222B |
| 11585 | Patient141C  | Patient196A |
| 11585 | Patient141C  | Patient196C |
| 11585 | Patient141C  | Patient222A |
| 11585 | Patient145C  | Patient196B |
| 11585 | Patient145C  | Patient196E |
| 11585 | Patient173A  | Patient247B |
| 11585 | Patient173A  | Patient247C |
| 11585 | Patient184   | Patient261A |
| 11585 | Patient196A  | Patient230A |
| 11585 | Patient196C  | Patient230A |
| 11585 | Patient218B  | Patient230B |
| 11585 | Patient230A  | Patient265  |
| 11585 | Patient230E  | Patient236A |
| 11586 | Patient021A1 | Patient026F |
| 11586 | Patient021A1 | Patient230F |
| 11586 | Patient021A2 | Patient066E |
| 11586 | Patient021A2 | Patient092H |
| 11586 | Patient021A2 | Patient230B |
| 11586 | Patient023   | Patient120A |
| 11586 | Patient026B  | Patient236B |
| 11586 | Patient032A  | Patient149B |
| 11586 | Patient032A  | Patient201A |
| 11586 | Patient032B  | Patient247A |
| 11586 | Patient034A  | Patient108D |
| 11586 | Patient034A  | Patient246A |
| 11586 | Patient034B  | Patient099A |
| 11586 | Patient034B  | Patient099C |
| 11586 | Patient034B  | Patient222A |
| 11586 | Patient034C  | Patient127B |
| 11586 | Patient034C  | Patient201E |
| 11586 | Patient034D  | Patient099D |
| 11586 | Patient034D  | Patient109A |
| 11586 | Patient034D  | Patient201B |
| 11586 | Patient034E  | Patient127A |
| 11586 | Patient045D  | Patient230F |
| 11586 | Patient066E  | Patient218B |
| 11586 | Patient066E  | Patient236B |
| 11586 | Patient079C  | Patient150C |
| 11586 | Patient081A1 | Patient127A |
| 11586 | Patient081A2 | Patient184  |
| 11586 | Patient081A2 | Patient246A |
| 11586 | Patient081A2 | Patient246C |
| 11586 | Patient081B  | Patient201A |
| 11586 | Patient081B  | Patient263B |
| 11586 | Patient081E  | Patient247A |
| 11586 | Patient081F  | Patient246B |
| 11586 | Patient092G  | Patient187  |
| 11586 | Patient097B  | Patient123C |

|       |              |             |
|-------|--------------|-------------|
| 11586 | Patient099A  | Patient123A |
| 11586 | Patient099B  | Patient230E |
| 11586 | Patient099B  | Patient261B |
| 11586 | Patient099C  | Patient123A |
| 11586 | Patient108A  | Patient123B |
| 11586 | Patient108D  | Patient150A |
| 11586 | Patient108H  | Patient261D |
| 11586 | Patient109B  | Patient213A |
| 11586 | Patient109D  | Patient261B |
| 11586 | Patient120C  | Patient232D |
| 11586 | Patient123A  | Patient222A |
| 11586 | Patient123B  | Patient218B |
| 11586 | Patient123C  | Patient187  |
| 11586 | Patient127A  | Patient145C |
| 11586 | Patient141A  | Patient196A |
| 11586 | Patient141A  | Patient196C |
| 11586 | Patient141A  | Patient222A |
| 11586 | Patient141A  | Patient236A |
| 11586 | Patient141D  | Patient247A |
| 11586 | Patient145A  | Patient236B |
| 11586 | Patient222A  | Patient261B |
| 11586 | Patient222D  | Patient230A |
| 11586 | Patient222F  | Patient261B |
| 11586 | Patient252A  | Patient261B |
| 11587 | Patient021A1 | Patient066D |
| 11587 | Patient021A1 | Patient066F |
| 11587 | Patient021A2 | Patient026B |
| 11587 | Patient026F  | Patient187  |
| 11587 | Patient026F  | Patient222B |
| 11587 | Patient034B  | Patient196B |
| 11587 | Patient034B  | Patient196E |
| 11587 | Patient034B  | Patient222E |
| 11587 | Patient034B  | Patient222F |
| 11587 | Patient034C  | Patient108D |
| 11587 | Patient034C  | Patient246A |
| 11587 | Patient034D  | Patient108F |
| 11587 | Patient034E  | Patient127B |
| 11587 | Patient034E  | Patient201E |
| 11587 | Patient066F  | Patient187  |
| 11587 | Patient079A1 | Patient123D |
| 11587 | Patient081A1 | Patient099D |
| 11587 | Patient081A1 | Patient127B |
| 11587 | Patient081A2 | Patient196D |
| 11587 | Patient092D  | Patient246D |
| 11587 | Patient092G  | Patient109C |
| 11587 | Patient092G  | Patient222B |
| 11587 | Patient099A  | Patient230E |
| 11587 | Patient099A  | Patient261B |
| 11587 | Patient099B  | Patient141C |
| 11587 | Patient099C  | Patient230E |

|       |              |             |
|-------|--------------|-------------|
| 11587 | Patient099C  | Patient261B |
| 11587 | Patient108F  | Patient161B |
| 11587 | Patient108H  | Patient123A |
| 11587 | Patient109A  | Patient161B |
| 11587 | Patient109A  | Patient261B |
| 11587 | Patient109D  | Patient150B |
| 11587 | Patient109E  | Patient123A |
| 11587 | Patient109E  | Patient261D |
| 11587 | Patient123A  | Patient222F |
| 11587 | Patient123D  | Patient236B |
| 11587 | Patient127B  | Patient145C |
| 11587 | Patient141B  | Patient222A |
| 11587 | Patient141B  | Patient236A |
| 11587 | Patient141C  | Patient196B |
| 11587 | Patient141C  | Patient196E |
| 11587 | Patient141C  | Patient222F |
| 11587 | Patient145C  | Patient201E |
| 11587 | Patient149B  | Patient261A |
| 11587 | Patient187   | Patient230B |
| 11587 | Patient196A  | Patient261B |
| 11587 | Patient196B  | Patient230A |
| 11587 | Patient196C  | Patient261B |
| 11587 | Patient196E  | Patient230A |
| 11587 | Patient201A  | Patient261A |
| 11587 | Patient222E  | Patient261B |
| 11588 | Patient021A1 | Patient066E |
| 11588 | Patient021A1 | Patient092H |
| 11588 | Patient021A1 | Patient192F |
| 11588 | Patient021A1 | Patient230B |
| 11588 | Patient026A  | Patient218A |
| 11588 | Patient026B  | Patient218B |
| 11588 | Patient026B  | Patient222B |
| 11588 | Patient032A  | Patient246C |
| 11588 | Patient032A  | Patient263B |
| 11588 | Patient032B  | Patient247B |
| 11588 | Patient032B  | Patient247C |
| 11588 | Patient034A  | Patient149B |
| 11588 | Patient034A  | Patient196D |
| 11588 | Patient034A  | Patient201A |
| 11588 | Patient034A  | Patient247E |
| 11588 | Patient034B  | Patient265  |
| 11588 | Patient034C  | Patient196D |
| 11588 | Patient034D  | Patient109B |
| 11588 | Patient034E  | Patient108D |
| 11588 | Patient034E  | Patient246A |
| 11588 | Patient066D  | Patient187  |
| 11588 | Patient066E  | Patient187  |
| 11588 | Patient079A1 | Patient145A |
| 11588 | Patient079A2 | Patient123D |
| 11588 | Patient079B  | Patient123C |

|       |              |             |
|-------|--------------|-------------|
| 11588 | Patient081A2 | Patient201A |
| 11588 | Patient081B  | Patient246B |
| 11588 | Patient081E  | Patient247B |
| 11588 | Patient081E  | Patient247C |
| 11588 | Patient092D  | Patient246E |
| 11588 | Patient097B  | Patient123B |
| 11588 | Patient097C  | Patient123C |
| 11588 | Patient099A  | Patient141C |
| 11588 | Patient099B  | Patient123C |
| 11588 | Patient099B  | Patient141A |
| 11588 | Patient099C  | Patient141C |
| 11588 | Patient103B  | Patient247D |
| 11588 | Patient108D  | Patient145C |
| 11588 | Patient108F  | Patient261B |
| 11588 | Patient108G  | Patient123C |
| 11588 | Patient109B  | Patient161B |
| 11588 | Patient109B  | Patient261B |
| 11588 | Patient123A  | Patient252A |
| 11588 | Patient123B  | Patient187  |
| 11588 | Patient141A  | Patient196B |
| 11588 | Patient141A  | Patient196E |
| 11588 | Patient141A  | Patient222E |
| 11588 | Patient141A  | Patient222F |
| 11588 | Patient141A  | Patient265  |
| 11588 | Patient141B  | Patient196A |
| 11588 | Patient141B  | Patient196C |
| 11588 | Patient141C  | Patient201B |
| 11588 | Patient141C  | Patient265  |
| 11588 | Patient141D  | Patient247B |
| 11588 | Patient141D  | Patient247C |
| 11588 | Patient145A  | Patient218A |
| 11588 | Patient196D  | Patient261A |
| 11588 | Patient201B  | Patient230A |
| 11588 | Patient222A  | Patient230E |
| 11588 | Patient222F  | Patient230E |
| 11588 | Patient236A  | Patient261D |
| 11588 | Patient246A  | Patient261A |
| 11588 | Patient252B  | Patient261B |
| 11588 | Patient261B  | Patient265  |
| 11589 | Patient026A  | Patient236B |
| 11589 | Patient034B  | Patient109D |
| 11589 | Patient034B  | Patient222D |
| 11589 | Patient034C  | Patient149B |
| 11589 | Patient034C  | Patient201A |
| 11589 | Patient034D  | Patient127A |
| 11589 | Patient034E  | Patient196D |
| 11589 | Patient034E  | Patient247E |
| 11589 | Patient074C  | Patient232B |
| 11589 | Patient079A1 | Patient150C |
| 11589 | Patient079A2 | Patient145A |

|       |              |             |
|-------|--------------|-------------|
| 11589 | Patient079B  | Patient261B |
| 11589 | Patient081A1 | Patient201E |
| 11589 | Patient081A2 | Patient263B |
| 11589 | Patient081F  | Patient247A |
| 11589 | Patient092G  | Patient097B |
| 11589 | Patient092G  | Patient108G |
| 11589 | Patient092G  | Patient109E |
| 11589 | Patient099A  | Patient123C |
| 11589 | Patient099A  | Patient141A |
| 11589 | Patient099B  | Patient261D |
| 11589 | Patient099C  | Patient123C |
| 11589 | Patient099C  | Patient141A |
| 11589 | Patient099D  | Patient230A |
| 11589 | Patient109A  | Patient150B |
| 11589 | Patient109C  | Patient123C |
| 11589 | Patient120D  | Patient196F |
| 11589 | Patient121A  | Patient246B |
| 11589 | Patient123A  | Patient196A |
| 11589 | Patient123A  | Patient196C |
| 11589 | Patient123A  | Patient222E |
| 11589 | Patient123C  | Patient222A |
| 11589 | Patient123C  | Patient236A |
| 11589 | Patient123D  | Patient218A |
| 11589 | Patient131   | Patient181B |
| 11589 | Patient141C  | Patient222E |
| 11589 | Patient145C  | Patient247E |
| 11589 | Patient196B  | Patient261B |
| 11589 | Patient196E  | Patient261B |
| 11589 | Patient201B  | Patient261B |
| 11589 | Patient222D  | Patient261B |
| 11589 | Patient230F  | Patient236A |
| 11589 | Patient247E  | Patient261A |
| 11590 | Patient021A1 | Patient026B |
| 11590 | Patient021A2 | Patient026A |
| 11590 | Patient021A2 | Patient092G |
| 11590 | Patient026A  | Patient218B |
| 11590 | Patient026A  | Patient222B |
| 11590 | Patient026B  | Patient187  |
| 11590 | Patient026F  | Patient236A |
| 11590 | Patient032A  | Patient184  |
| 11590 | Patient032B  | Patient246D |
| 11590 | Patient032B  | Patient246E |
| 11590 | Patient034A  | Patient263B |
| 11590 | Patient034B  | Patient099D |
| 11590 | Patient034B  | Patient109A |
| 11590 | Patient034B  | Patient201B |
| 11590 | Patient034C  | Patient247E |
| 11590 | Patient034D  | Patient127B |
| 11590 | Patient034D  | Patient201E |
| 11590 | Patient034E  | Patient149B |



|       |              |             |
|-------|--------------|-------------|
| 11590 | Patient034E  | Patient201A |
| 11590 | Patient045D  | Patient230B |
| 11590 | Patient074B  | Patient232B |
| 11590 | Patient079A2 | Patient150C |
| 11590 | Patient079B  | Patient092G |
| 11590 | Patient081A2 | Patient246B |
| 11590 | Patient092G  | Patient099B |
| 11590 | Patient092G  | Patient108H |
| 11590 | Patient092G  | Patient252F |
| 11590 | Patient097C  | Patient123B |
| 11590 | Patient097D  | Patient123D |
| 11590 | Patient097D  | Patient145A |
| 11590 | Patient099A  | Patient261D |
| 11590 | Patient099B  | Patient141B |
| 11590 | Patient099C  | Patient261D |
| 11590 | Patient099D  | Patient123A |
| 11590 | Patient108A  | Patient145A |
| 11590 | Patient108D  | Patient213A |
| 11590 | Patient108G  | Patient123B |
| 11590 | Patient108H  | Patient123C |
| 11590 | Patient109C  | Patient123B |
| 11590 | Patient109D  | Patient261D |
| 11590 | Patient109E  | Patient123C |
| 11590 | Patient120D  | Patient222C |
| 11590 | Patient123A  | Patient189E |
| 11590 | Patient123A  | Patient201B |
| 11590 | Patient123A  | Patient252B |
| 11590 | Patient123A  | Patient265  |
| 11590 | Patient123B  | Patient236A |
| 11590 | Patient123C  | Patient222F |
| 11590 | Patient141A  | Patient201B |
| 11590 | Patient141B  | Patient196B |
| 11590 | Patient141B  | Patient196E |
| 11590 | Patient141B  | Patient201B |
| 11590 | Patient141B  | Patient222E |
| 11590 | Patient141B  | Patient222F |
| 11590 | Patient141B  | Patient265  |
| 11590 | Patient141C  | Patient222D |
| 11590 | Patient141D  | Patient246D |
| 11590 | Patient141D  | Patient246E |
| 11590 | Patient145C  | Patient149B |
| 11590 | Patient145C  | Patient201A |
| 11590 | Patient157   | Patient192F |
| 11590 | Patient196A  | Patient230E |
| 11590 | Patient196C  | Patient230E |
| 11590 | Patient222E  | Patient230E |
| 11590 | Patient222F  | Patient261D |
| 11590 | Patient230A  | Patient247E |
| 11590 | Patient230E  | Patient265  |
| 11590 | Patient246C  | Patient261A |

|       |              |              |
|-------|--------------|--------------|
| 11590 | Patient252A  | Patient261D  |
| 11590 | Patient261A  | Patient263B  |
| 11591 | Patient026F  | Patient099B  |
| 11591 | Patient026F  | Patient196A  |
| 11591 | Patient026F  | Patient196C  |
| 11591 | Patient026F  | Patient222F  |
| 11591 | Patient034A  | Patient246C  |
| 11591 | Patient034B  | Patient108F  |
| 11591 | Patient034C  | Patient263B  |
| 11591 | Patient034D  | Patient108D  |
| 11591 | Patient034D  | Patient246A  |
| 11591 | Patient066D  | Patient108B1 |
| 11591 | Patient066D  | Patient108B2 |
| 11591 | Patient066F  | Patient108B1 |
| 11591 | Patient066F  | Patient108B2 |
| 11591 | Patient074A  | Patient232B  |
| 11591 | Patient074D  | Patient232B  |
| 11591 | Patient079B  | Patient123B  |
| 11591 | Patient079C  | Patient150A  |
| 11591 | Patient081A1 | Patient149B  |
| 11591 | Patient081A1 | Patient184   |
| 11591 | Patient081A1 | Patient246A  |
| 11591 | Patient081A1 | Patient246C  |
| 11591 | Patient081B  | Patient247A  |
| 11591 | Patient081E  | Patient246D  |
| 11591 | Patient081E  | Patient246E  |
| 11591 | Patient081F  | Patient247B  |
| 11591 | Patient081F  | Patient247C  |
| 11591 | Patient099A  | Patient141B  |
| 11591 | Patient099B  | Patient123B  |
| 11591 | Patient099C  | Patient141B  |
| 11591 | Patient099D  | Patient261B  |
| 11591 | Patient100A  | Patient173A  |
| 11591 | Patient109A  | Patient261D  |
| 11591 | Patient109B  | Patient150B  |
| 11591 | Patient109D  | Patient123A  |
| 11591 | Patient120B  | Patient196F  |
| 11591 | Patient123A  | Patient189A  |
| 11591 | Patient123A  | Patient196B  |
| 11591 | Patient123A  | Patient196E  |
| 11591 | Patient123B  | Patient222A  |
| 11591 | Patient123C  | Patient252A  |
| 11591 | Patient123D  | Patient222B  |
| 11591 | Patient126C  | Patient213B  |
| 11591 | Patient127A  | Patient230A  |
| 11591 | Patient127B  | Patient141C  |
| 11591 | Patient127B  | Patient230A  |
| 11591 | Patient131   | Patient181A  |
| 11591 | Patient141A  | Patient222D  |
| 11591 | Patient173A  | Patient247E  |

|       |              |              |
|-------|--------------|--------------|
| 11591 | Patient196A  | Patient261D  |
| 11591 | Patient196C  | Patient261D  |
| 11591 | Patient201E  | Patient230A  |
| 11591 | Patient222A  | Patient261D  |
| 11591 | Patient222E  | Patient261D  |
| 11591 | Patient222F  | Patient230F  |
| 11592 | Patient021A1 | Patient092G  |
| 11592 | Patient026A  | Patient187   |
| 11592 | Patient026F  | Patient099C  |
| 11592 | Patient032A  | Patient246B  |
| 11592 | Patient034B  | Patient109B  |
| 11592 | Patient034C  | Patient246C  |
| 11592 | Patient034D  | Patient196D  |
| 11592 | Patient034D  | Patient247E  |
| 11592 | Patient034E  | Patient263B  |
| 11592 | Patient066E  | Patient108B1 |
| 11592 | Patient066E  | Patient108B2 |
| 11592 | Patient081A1 | Patient196D  |
| 11592 | Patient092G  | Patient097C  |
| 11592 | Patient092G  | Patient099A  |
| 11592 | Patient092G  | Patient109D  |
| 11592 | Patient099A  | Patient123B  |
| 11592 | Patient099C  | Patient123B  |
| 11592 | Patient099D  | Patient230E  |
| 11592 | Patient108D  | Patient161B  |
| 11592 | Patient108D  | Patient261B  |
| 11592 | Patient108F  | Patient150B  |
| 11592 | Patient108F  | Patient261D  |
| 11592 | Patient108H  | Patient123B  |
| 11592 | Patient109A  | Patient123A  |
| 11592 | Patient109B  | Patient261D  |
| 11592 | Patient109E  | Patient123B  |
| 11592 | Patient120B  | Patient222C  |
| 11592 | Patient123A  | Patient189B  |
| 11592 | Patient123A  | Patient222D  |
| 11592 | Patient123B  | Patient222F  |
| 11592 | Patient123C  | Patient196A  |
| 11592 | Patient123C  | Patient196C  |
| 11592 | Patient123C  | Patient222E  |
| 11592 | Patient127A  | Patient141C  |
| 11592 | Patient127B  | Patient141A  |
| 11592 | Patient131   | Patient220B  |
| 11592 | Patient141B  | Patient222D  |
| 11592 | Patient141C  | Patient247E  |
| 11592 | Patient145A  | Patient218B  |
| 11592 | Patient145C  | Patient246A  |
| 11592 | Patient159   | Patient173A  |
| 11592 | Patient164   | Patient246A  |
| 11592 | Patient196B  | Patient230E  |
| 11592 | Patient196E  | Patient230E  |

|       |              |             |
|-------|--------------|-------------|
| 11592 | Patient201B  | Patient230E |
| 11592 | Patient222A  | Patient230F |
| 11592 | Patient252B  | Patient261D |
| 11592 | Patient261D  | Patient265  |
| 11593 | Patient021A1 | Patient026A |
| 11593 | Patient026F  | Patient099A |
| 11593 | Patient026F  | Patient196B |
| 11593 | Patient026F  | Patient196E |
| 11593 | Patient034A  | Patient184  |
| 11593 | Patient034B  | Patient127A |
| 11593 | Patient034D  | Patient149B |
| 11593 | Patient034D  | Patient201A |
| 11593 | Patient034E  | Patient246C |
| 11593 | Patient066D  | Patient236A |
| 11593 | Patient074E  | Patient232B |
| 11593 | Patient079B  | Patient261D |
| 11593 | Patient081A1 | Patient201A |
| 11593 | Patient081A2 | Patient247A |
| 11593 | Patient081B  | Patient247B |
| 11593 | Patient081B  | Patient247C |
| 11593 | Patient081F  | Patient246D |
| 11593 | Patient092G  | Patient222F |
| 11593 | Patient092G  | Patient236A |
| 11593 | Patient097B  | Patient213A |
| 11593 | Patient099B  | Patient230F |
| 11593 | Patient099D  | Patient123C |
| 11593 | Patient099D  | Patient141A |
| 11593 | Patient099D  | Patient141C |
| 11593 | Patient108A  | Patient123D |
| 11593 | Patient109B  | Patient123A |
| 11593 | Patient120A  | Patient159  |
| 11593 | Patient123B  | Patient252A |
| 11593 | Patient123C  | Patient189E |
| 11593 | Patient123C  | Patient252B |
| 11593 | Patient123C  | Patient265  |
| 11593 | Patient123D  | Patient218B |
| 11593 | Patient127A  | Patient141A |
| 11593 | Patient127A  | Patient230E |
| 11593 | Patient127A  | Patient261B |
| 11593 | Patient145A  | Patient187  |
| 11593 | Patient145C  | Patient246C |
| 11593 | Patient145C  | Patient263B |
| 11593 | Patient149B  | Patient230A |
| 11593 | Patient196B  | Patient261D |
| 11593 | Patient196E  | Patient261D |
| 11593 | Patient201B  | Patient261D |
| 11593 | Patient222D  | Patient261D |
| 11593 | Patient222E  | Patient230F |
| 11593 | Patient230B  | Patient236A |
| 11593 | Patient246B  | Patient261A |

|       |              |             |
|-------|--------------|-------------|
| 11593 | Patient252F  | Patient261B |
| 11594 | Patient026F  | Patient222A |
| 11594 | Patient026F  | Patient222E |
| 11594 | Patient034B  | Patient127B |
| 11594 | Patient034B  | Patient201E |
| 11594 | Patient034C  | Patient184  |
| 11594 | Patient066E  | Patient236A |
| 11594 | Patient066F  | Patient236A |
| 11594 | Patient079A1 | Patient150A |
| 11594 | Patient081A1 | Patient263B |
| 11594 | Patient081F  | Patient246E |
| 11594 | Patient092G  | Patient099C |
| 11594 | Patient092G  | Patient196C |
| 11594 | Patient092G  | Patient222A |
| 11594 | Patient099D  | Patient261D |
| 11594 | Patient109C  | Patient145A |
| 11594 | Patient109D  | Patient123C |
| 11594 | Patient123A  | Patient127A |
| 11594 | Patient123A  | Patient201E |
| 11594 | Patient123B  | Patient196A |
| 11594 | Patient123B  | Patient196C |
| 11594 | Patient123B  | Patient222E |
| 11594 | Patient123C  | Patient189A |
| 11594 | Patient123C  | Patient196B |
| 11594 | Patient123C  | Patient196E |
| 11594 | Patient123C  | Patient201B |
| 11594 | Patient123D  | Patient187  |
| 11594 | Patient127B  | Patient141B |
| 11594 | Patient127B  | Patient230E |
| 11594 | Patient127B  | Patient261B |
| 11594 | Patient141A  | Patient201E |
| 11594 | Patient141B  | Patient247E |
| 11594 | Patient145C  | Patient196D |
| 11594 | Patient164   | Patient246C |
| 11594 | Patient196A  | Patient230F |
| 11594 | Patient196C  | Patient230F |
| 11594 | Patient201A  | Patient230A |
| 11594 | Patient201E  | Patient261B |
| 11594 | Patient230F  | Patient265  |
| 11594 | Patient247E  | Patient261B |
| 11595 | Patient026B  | Patient236A |
| 11595 | Patient032A  | Patient247A |
| 11595 | Patient034A  | Patient246B |
| 11595 | Patient034B  | Patient108D |
| 11595 | Patient034B  | Patient246A |
| 11595 | Patient034D  | Patient263B |
| 11595 | Patient034E  | Patient184  |
| 11595 | Patient066D  | Patient099B |
| 11595 | Patient066F  | Patient099B |
| 11595 | Patient066F  | Patient222F |

|       |              |             |
|-------|--------------|-------------|
| 11595 | Patient079A2 | Patient150A |
| 11595 | Patient081A1 | Patient246B |
| 11595 | Patient081A2 | Patient247B |
| 11595 | Patient081A2 | Patient247C |
| 11595 | Patient081B  | Patient246D |
| 11595 | Patient081B  | Patient246E |
| 11595 | Patient092G  | Patient109A |
| 11595 | Patient092G  | Patient189E |
| 11595 | Patient092G  | Patient196A |
| 11595 | Patient092G  | Patient265  |
| 11595 | Patient092H  | Patient157  |
| 11595 | Patient097B  | Patient123D |
| 11595 | Patient097B  | Patient145A |
| 11595 | Patient099A  | Patient230F |
| 11595 | Patient099C  | Patient230F |
| 11595 | Patient099D  | Patient141B |
| 11595 | Patient108F  | Patient123A |
| 11595 | Patient108G  | Patient145A |
| 11595 | Patient109A  | Patient123C |
| 11595 | Patient121A  | Patient246D |
| 11595 | Patient123A  | Patient127B |
| 11595 | Patient123A  | Patient252F |
| 11595 | Patient123B  | Patient201B |
| 11595 | Patient123B  | Patient252B |
| 11595 | Patient123B  | Patient265  |
| 11595 | Patient123C  | Patient189B |
| 11595 | Patient123C  | Patient222D |
| 11595 | Patient126C  | Patient189E |
| 11595 | Patient127A  | Patient141B |
| 11595 | Patient131   | Patient224B |
| 11595 | Patient141A  | Patient247E |
| 11595 | Patient141C  | Patient196D |
| 11595 | Patient141C  | Patient201E |
| 11595 | Patient145A  | Patient236A |
| 11595 | Patient145C  | Patient184  |
| 11595 | Patient173B  | Patient222D |
| 11595 | Patient184   | Patient261B |
| 11595 | Patient201B  | Patient230F |
| 11595 | Patient222A  | Patient230B |
| 11595 | Patient222D  | Patient230F |
| 11595 | Patient222F  | Patient230B |
| 11596 | Patient021A2 | Patient092E |
| 11596 | Patient021A2 | Patient121A |
| 11596 | Patient026B  | Patient099B |
| 11596 | Patient026B  | Patient196A |
| 11596 | Patient026B  | Patient196C |
| 11596 | Patient026B  | Patient222F |
| 11596 | Patient026F  | Patient265  |
| 11596 | Patient034B  | Patient196D |
| 11596 | Patient034B  | Patient247E |

|       |             |             |
|-------|-------------|-------------|
| 11596 | Patient034C | Patient246B |
| 11596 | Patient034D | Patient246C |
| 11596 | Patient066D | Patient099A |
| 11596 | Patient066D | Patient099C |
| 11596 | Patient066D | Patient222A |
| 11596 | Patient066D | Patient222F |
| 11596 | Patient066E | Patient099B |
| 11596 | Patient066F | Patient099A |
| 11596 | Patient066F | Patient099C |
| 11596 | Patient092G | Patient189A |
| 11596 | Patient092G | Patient189B |
| 11596 | Patient092G | Patient222E |
| 11596 | Patient097C | Patient145A |
| 11596 | Patient099B | Patient145A |
| 11596 | Patient099B | Patient230B |
| 11596 | Patient099D | Patient123B |
| 11596 | Patient104B | Patient126C |
| 11596 | Patient108D | Patient150B |
| 11596 | Patient108D | Patient261D |
| 11596 | Patient109D | Patient123B |
| 11596 | Patient109E | Patient145A |
| 11596 | Patient120D | Patient263A |
| 11596 | Patient121A | Patient246E |
| 11596 | Patient123B | Patient189E |
| 11596 | Patient123B | Patient196B |
| 11596 | Patient123B | Patient196E |
| 11596 | Patient126C | Patient189A |
| 11596 | Patient141A | Patient196D |
| 11596 | Patient141B | Patient201E |
| 11596 | Patient145A | Patient252A |
| 11596 | Patient159  | Patient192F |
| 11596 | Patient196D | Patient230A |
| 11596 | Patient222E | Patient230B |
| 11596 | Patient230A | Patient246A |
| 11596 | Patient230E | Patient247E |
| 11597 | Patient026A | Patient236A |
| 11597 | Patient026B | Patient099C |
| 11597 | Patient026F | Patient099D |
| 11597 | Patient026F | Patient201B |
| 11597 | Patient026F | Patient222D |
| 11597 | Patient032A | Patient247B |
| 11597 | Patient032A | Patient247C |
| 11597 | Patient034B | Patient149B |
| 11597 | Patient034B | Patient201A |
| 11597 | Patient034E | Patient246B |
| 11597 | Patient066D | Patient196A |
| 11597 | Patient066D | Patient196C |
| 11597 | Patient066D | Patient222E |
| 11597 | Patient066E | Patient222A |
| 11597 | Patient066E | Patient222F |

|       |              |             |
|-------|--------------|-------------|
| 11597 | Patient066F  | Patient196A |
| 11597 | Patient066F  | Patient196C |
| 11597 | Patient066F  | Patient222A |
| 11597 | Patient066F  | Patient222E |
| 11597 | Patient079B  | Patient123D |
| 11597 | Patient081A2 | Patient246D |
| 11597 | Patient092G  | Patient099D |
| 11597 | Patient092G  | Patient109B |
| 11597 | Patient092H  | Patient159  |
| 11597 | Patient097C  | Patient123D |
| 11597 | Patient099A  | Patient145A |
| 11597 | Patient099A  | Patient230B |
| 11597 | Patient099B  | Patient123D |
| 11597 | Patient099C  | Patient145A |
| 11597 | Patient099C  | Patient230B |
| 11597 | Patient108D  | Patient123A |
| 11597 | Patient108G  | Patient123D |
| 11597 | Patient108H  | Patient145A |
| 11597 | Patient109A  | Patient123B |
| 11597 | Patient109B  | Patient123C |
| 11597 | Patient109C  | Patient123D |
| 11597 | Patient120C  | Patient196F |
| 11597 | Patient123A  | Patient149B |
| 11597 | Patient123B  | Patient189A |
| 11597 | Patient123B  | Patient222D |
| 11597 | Patient123C  | Patient127A |
| 11597 | Patient123C  | Patient201E |
| 11597 | Patient123C  | Patient252F |
| 11597 | Patient123D  | Patient236A |
| 11597 | Patient126A  | Patient131  |
| 11597 | Patient126C  | Patient189B |
| 11597 | Patient127A  | Patient261D |
| 11597 | Patient141A  | Patient149B |
| 11597 | Patient141A  | Patient201A |
| 11597 | Patient141C  | Patient149B |
| 11597 | Patient141C  | Patient201A |
| 11597 | Patient145C  | Patient246B |
| 11597 | Patient149B  | Patient261B |
| 11597 | Patient164   | Patient246B |
| 11597 | Patient184   | Patient230A |
| 11597 | Patient192A  | Patient247D |
| 11597 | Patient195   | Patient247D |
| 11597 | Patient196A  | Patient230B |
| 11597 | Patient196B  | Patient230F |
| 11597 | Patient196C  | Patient230B |
| 11597 | Patient196E  | Patient230F |
| 11597 | Patient201A  | Patient261B |
| 11597 | Patient201E  | Patient230E |
| 11597 | Patient230A  | Patient246C |
| 11597 | Patient230A  | Patient263B |



|       |              |             |
|-------|--------------|-------------|
| 11597 | Patient230B  | Patient265  |
| 11597 | Patient252F  | Patient261D |
| 11598 | Patient021A1 | Patient092E |
| 11598 | Patient021A1 | Patient121A |
| 11598 | Patient021A2 | Patient092A |
| 11598 | Patient026A  | Patient099B |
| 11598 | Patient026A  | Patient196A |
| 11598 | Patient026A  | Patient196C |
| 11598 | Patient026A  | Patient222F |
| 11598 | Patient026B  | Patient099A |
| 11598 | Patient026B  | Patient196B |
| 11598 | Patient026B  | Patient196E |
| 11598 | Patient026B  | Patient222A |
| 11598 | Patient032A  | Patient246D |
| 11598 | Patient034A  | Patient247A |
| 11598 | Patient034D  | Patient184  |
| 11598 | Patient066D  | Patient265  |
| 11598 | Patient066E  | Patient099A |
| 11598 | Patient066E  | Patient099C |
| 11598 | Patient066E  | Patient196A |
| 11598 | Patient066E  | Patient196C |
| 11598 | Patient066E  | Patient222E |
| 11598 | Patient066F  | Patient222D |
| 11598 | Patient066F  | Patient265  |
| 11598 | Patient074C  | Patient232A |
| 11598 | Patient074C  | Patient232C |
| 11598 | Patient079B  | Patient145A |
| 11598 | Patient079B  | Patient150C |
| 11598 | Patient081A1 | Patient247A |
| 11598 | Patient081A2 | Patient246E |
| 11598 | Patient092G  | Patient108F |
| 11598 | Patient092G  | Patient196B |
| 11598 | Patient092G  | Patient196E |
| 11598 | Patient092G  | Patient201B |
| 11598 | Patient092G  | Patient222D |
| 11598 | Patient099A  | Patient123D |
| 11598 | Patient099C  | Patient123D |
| 11598 | Patient099D  | Patient230F |
| 11598 | Patient108F  | Patient123C |
| 11598 | Patient109B  | Patient123B |
| 11598 | Patient120A  | Patient196F |
| 11598 | Patient120C  | Patient222C |
| 11598 | Patient123A  | Patient201A |
| 11598 | Patient123A  | Patient247E |
| 11598 | Patient123C  | Patient127B |
| 11598 | Patient123D  | Patient222A |
| 11598 | Patient127B  | Patient261D |
| 11598 | Patient141A  | Patient246A |
| 11598 | Patient141B  | Patient196D |
| 11598 | Patient141C  | Patient246A |

|       |              |             |
|-------|--------------|-------------|
| 11598 | Patient141C  | Patient246C |
| 11598 | Patient145A  | Patient252B |
| 11598 | Patient149B  | Patient230E |
| 11598 | Patient196D  | Patient261B |
| 11598 | Patient201B  | Patient230B |
| 11598 | Patient201E  | Patient261D |
| 11598 | Patient222D  | Patient230B |
| 11598 | Patient246A  | Patient261B |
| 11598 | Patient247A  | Patient261A |
| 11598 | Patient247E  | Patient261D |
| 11599 | Patient026B  | Patient222E |
| 11599 | Patient026F  | Patient127A |
| 11599 | Patient026F  | Patient201E |
| 11599 | Patient032A  | Patient246E |
| 11599 | Patient034C  | Patient247A |
| 11599 | Patient066D  | Patient196B |
| 11599 | Patient066D  | Patient196E |
| 11599 | Patient066D  | Patient201B |
| 11599 | Patient066D  | Patient222D |
| 11599 | Patient066E  | Patient265  |
| 11599 | Patient066F  | Patient196B |
| 11599 | Patient066F  | Patient196E |
| 11599 | Patient066F  | Patient201B |
| 11599 | Patient074B  | Patient232A |
| 11599 | Patient074B  | Patient232C |
| 11599 | Patient074C  | Patient232E |
| 11599 | Patient092G  | Patient127A |
| 11599 | Patient092G  | Patient157  |
| 11599 | Patient108H  | Patient123D |
| 11599 | Patient109E  | Patient123D |
| 11599 | Patient120A  | Patient222C |
| 11599 | Patient123B  | Patient127A |
| 11599 | Patient123B  | Patient127B |
| 11599 | Patient123B  | Patient189B |
| 11599 | Patient123B  | Patient201E |
| 11599 | Patient123D  | Patient252A |
| 11599 | Patient141A  | Patient246C |
| 11599 | Patient141B  | Patient149B |
| 11599 | Patient141B  | Patient201A |
| 11599 | Patient145A  | Patient222A |
| 11599 | Patient145A  | Patient222F |
| 11599 | Patient184   | Patient261D |
| 11599 | Patient196B  | Patient230B |
| 11599 | Patient196E  | Patient230B |
| 11599 | Patient201A  | Patient230E |
| 11599 | Patient230F  | Patient247E |
| 11599 | Patient247C  | Patient261A |
| 11600 | Patient021A1 | Patient092A |
| 11600 | Patient021A2 | Patient121B |
| 11600 | Patient026A  | Patient099A |

|       |              |             |
|-------|--------------|-------------|
| 11600 | Patient026A  | Patient099C |
| 11600 | Patient026A  | Patient196E |
| 11600 | Patient026A  | Patient222E |
| 11600 | Patient026B  | Patient201B |
| 11600 | Patient026B  | Patient222D |
| 11600 | Patient026B  | Patient265  |
| 11600 | Patient026F  | Patient127B |
| 11600 | Patient034A  | Patient247B |
| 11600 | Patient034A  | Patient247C |
| 11600 | Patient034B  | Patient246C |
| 11600 | Patient034B  | Patient263B |
| 11600 | Patient034D  | Patient246B |
| 11600 | Patient034E  | Patient247A |
| 11600 | Patient066D  | Patient099D |
| 11600 | Patient066E  | Patient201B |
| 11600 | Patient066E  | Patient222D |
| 11600 | Patient066F  | Patient099D |
| 11600 | Patient074A  | Patient232A |
| 11600 | Patient074A  | Patient232C |
| 11600 | Patient074B  | Patient232E |
| 11600 | Patient074D  | Patient232A |
| 11600 | Patient074D  | Patient232C |
| 11600 | Patient081A1 | Patient247B |
| 11600 | Patient081A1 | Patient247C |
| 11600 | Patient092G  | Patient127B |
| 11600 | Patient103D  | Patient157  |
| 11600 | Patient104A  | Patient126C |
| 11600 | Patient108D  | Patient123C |
| 11600 | Patient108F  | Patient123B |
| 11600 | Patient109D  | Patient145A |
| 11600 | Patient120B  | Patient263A |
| 11600 | Patient123A  | Patient246A |
| 11600 | Patient123A  | Patient246C |
| 11600 | Patient123B  | Patient252F |
| 11600 | Patient123C  | Patient149B |
| 11600 | Patient123D  | Patient222F |
| 11600 | Patient126C  | Patient252D |
| 11600 | Patient126D  | Patient220B |
| 11600 | Patient127A  | Patient230F |
| 11600 | Patient141A  | Patient184  |
| 11600 | Patient141B  | Patient246A |
| 11600 | Patient141C  | Patient246B |
| 11600 | Patient141C  | Patient263B |
| 11600 | Patient145A  | Patient222E |
| 11600 | Patient145A  | Patient265  |
| 11600 | Patient145C  | Patient247A |
| 11600 | Patient184   | Patient230E |
| 11600 | Patient192C  | Patient247D |
| 11600 | Patient201E  | Patient230F |
| 11600 | Patient222D  | Patient230E |

|       |              |             |
|-------|--------------|-------------|
| 11600 | Patient230E  | Patient246A |
| 11600 | Patient246C  | Patient261B |
| 11600 | Patient246E  | Patient261A |
| 11600 | Patient247B  | Patient261A |
| 11600 | Patient261B  | Patient263B |
| 11601 | Patient026A  | Patient196B |
| 11601 | Patient034A  | Patient246D |
| 11601 | Patient034C  | Patient247B |
| 11601 | Patient034C  | Patient247C |
| 11601 | Patient066E  | Patient099D |
| 11601 | Patient066E  | Patient196B |
| 11601 | Patient066E  | Patient196E |
| 11601 | Patient074A  | Patient232E |
| 11601 | Patient074D  | Patient232E |
| 11601 | Patient079C  | Patient150B |
| 11601 | Patient092G  | Patient108D |
| 11601 | Patient099D  | Patient145A |
| 11601 | Patient099D  | Patient230B |
| 11601 | Patient123A  | Patient196D |
| 11601 | Patient123A  | Patient263B |
| 11601 | Patient123C  | Patient201A |
| 11601 | Patient123D  | Patient189E |
| 11601 | Patient123D  | Patient196A |
| 11601 | Patient123D  | Patient196C |
| 11601 | Patient123D  | Patient222E |
| 11601 | Patient123D  | Patient252B |
| 11601 | Patient127B  | Patient230F |
| 11601 | Patient141A  | Patient246B |
| 11601 | Patient141A  | Patient263B |
| 11601 | Patient141B  | Patient246C |
| 11601 | Patient141C  | Patient184  |
| 11601 | Patient145A  | Patient196A |
| 11601 | Patient145A  | Patient196C |
| 11601 | Patient145A  | Patient201B |
| 11601 | Patient149B  | Patient261D |
| 11601 | Patient164   | Patient246D |
| 11601 | Patient196D  | Patient230E |
| 11601 | Patient201A  | Patient261D |
| 11601 | Patient230A  | Patient246B |
| 11601 | Patient246D  | Patient261A |
| 11602 | Patient021A1 | Patient121B |
| 11602 | Patient026A  | Patient201B |
| 11602 | Patient026A  | Patient222A |
| 11602 | Patient026A  | Patient222D |
| 11602 | Patient026A  | Patient265  |
| 11602 | Patient026F  | Patient196D |
| 11602 | Patient034A  | Patient246E |
| 11602 | Patient034E  | Patient247B |
| 11602 | Patient034E  | Patient247C |
| 11602 | Patient045D  | Patient258E |

|       |              |             |
|-------|--------------|-------------|
| 11602 | Patient074E  | Patient232A |
| 11602 | Patient074E  | Patient232C |
| 11602 | Patient081A1 | Patient246D |
| 11602 | Patient092G  | Patient201E |
| 11602 | Patient099D  | Patient123D |
| 11602 | Patient108D  | Patient123B |
| 11602 | Patient109A  | Patient145A |
| 11602 | Patient123B  | Patient149B |
| 11602 | Patient123C  | Patient247E |
| 11602 | Patient123D  | Patient189A |
| 11602 | Patient123D  | Patient201B |
| 11602 | Patient123D  | Patient265  |
| 11602 | Patient141B  | Patient184  |
| 11602 | Patient145A  | Patient222D |
| 11602 | Patient145C  | Patient247B |
| 11602 | Patient145C  | Patient247C |
| 11602 | Patient149B  | Patient230F |
| 11602 | Patient164   | Patient246E |
| 11602 | Patient196D  | Patient261D |
| 11602 | Patient230E  | Patient263B |
| 11602 | Patient246A  | Patient261D |
| 11603 | Patient021A2 | Patient092B |
| 11603 | Patient026B  | Patient099D |
| 11603 | Patient034B  | Patient184  |
| 11603 | Patient034C  | Patient246D |
| 11603 | Patient034C  | Patient246E |
| 11603 | Patient034D  | Patient247A |
| 11603 | Patient034E  | Patient246D |
| 11603 | Patient066D  | Patient127A |
| 11603 | Patient066F  | Patient127A |
| 11603 | Patient074E  | Patient232E |
| 11603 | Patient079B  | Patient150A |
| 11603 | Patient081A1 | Patient246E |
| 11603 | Patient108F  | Patient145A |
| 11603 | Patient109B  | Patient145A |
| 11603 | Patient109D  | Patient123D |
| 11603 | Patient123B  | Patient201A |
| 11603 | Patient123C  | Patient246A |
| 11603 | Patient123C  | Patient246C |
| 11603 | Patient123D  | Patient189B |
| 11603 | Patient123D  | Patient196B |
| 11603 | Patient123D  | Patient196E |
| 11603 | Patient127A  | Patient230B |
| 11603 | Patient127B  | Patient230B |
| 11603 | Patient141B  | Patient246B |
| 11603 | Patient141B  | Patient263B |
| 11603 | Patient145A  | Patient196B |
| 11603 | Patient145A  | Patient196E |
| 11603 | Patient145A  | Patient252F |
| 11603 | Patient145C  | Patient246D |

|       |              |             |
|-------|--------------|-------------|
| 11603 | Patient192B  | Patient247D |
| 11603 | Patient201A  | Patient230F |
| 11603 | Patient201E  | Patient230B |
| 11603 | Patient230A  | Patient247A |
| 11603 | Patient230B  | Patient247E |
| 11603 | Patient246B  | Patient261B |
| 11603 | Patient246C  | Patient261D |
| 11604 | Patient026A  | Patient099D |
| 11604 | Patient026B  | Patient127A |
| 11604 | Patient026B  | Patient201E |
| 11604 | Patient026F  | Patient149B |
| 11604 | Patient026F  | Patient189E |
| 11604 | Patient026F  | Patient201A |
| 11604 | Patient034B  | Patient246B |
| 11604 | Patient034E  | Patient246E |
| 11604 | Patient066D  | Patient127B |
| 11604 | Patient066D  | Patient201E |
| 11604 | Patient066E  | Patient127A |
| 11604 | Patient066F  | Patient127B |
| 11604 | Patient066F  | Patient201E |
| 11604 | Patient074C  | Patient232D |
| 11604 | Patient079A1 | Patient150B |
| 11604 | Patient092G  | Patient247E |
| 11604 | Patient092G  | Patient263B |
| 11604 | Patient109A  | Patient123D |
| 11604 | Patient123A  | Patient184  |
| 11604 | Patient123B  | Patient246A |
| 11604 | Patient123B  | Patient247E |
| 11604 | Patient123C  | Patient196D |
| 11604 | Patient123C  | Patient263B |
| 11604 | Patient123D  | Patient222D |
| 11604 | Patient145C  | Patient246E |
| 11604 | Patient230E  | Patient246C |
| 11604 | Patient261D  | Patient263B |
| 11605 | Patient021A1 | Patient092B |
| 11605 | Patient026A  | Patient201E |
| 11605 | Patient026B  | Patient127B |
| 11605 | Patient026F  | Patient184  |
| 11605 | Patient026F  | Patient189A |
| 11605 | Patient026F  | Patient246C |
| 11605 | Patient034D  | Patient247B |
| 11605 | Patient034D  | Patient247C |
| 11605 | Patient066E  | Patient127B |
| 11605 | Patient066E  | Patient201E |
| 11605 | Patient074B  | Patient232D |
| 11605 | Patient079A2 | Patient150B |
| 11605 | Patient092E  | Patient157  |
| 11605 | Patient092G  | Patient149B |
| 11605 | Patient109B  | Patient123D |
| 11605 | Patient123A  | Patient246B |

|       |             |             |
|-------|-------------|-------------|
| 11605 | Patient123B | Patient246C |
| 11605 | Patient127A | Patient145A |
| 11605 | Patient141A | Patient247A |
| 11605 | Patient141C | Patient247A |
| 11605 | Patient145A | Patient247E |
| 11605 | Patient149B | Patient230B |
| 11605 | Patient173B | Patient196D |
| 11605 | Patient173B | Patient246A |
| 11605 | Patient173B | Patient246C |
| 11605 | Patient196D | Patient230F |
| 11605 | Patient230A | Patient247B |
| 11605 | Patient230A | Patient247C |
| 11606 | Patient026A | Patient127A |
| 11606 | Patient026F | Patient189B |
| 11606 | Patient026F | Patient246A |
| 11606 | Patient026F | Patient247E |
| 11606 | Patient026F | Patient263B |
| 11606 | Patient034D | Patient246D |
| 11606 | Patient066D | Patient247E |
| 11606 | Patient066F | Patient196D |
| 11606 | Patient066F | Patient247E |
| 11606 | Patient074A | Patient232D |
| 11606 | Patient092G | Patient196D |
| 11606 | Patient092G | Patient201A |
| 11606 | Patient097E | Patient192D |
| 11606 | Patient103E | Patient157  |
| 11606 | Patient120C | Patient263A |
| 11606 | Patient123B | Patient196D |
| 11606 | Patient123B | Patient263B |
| 11606 | Patient123D | Patient127A |
| 11606 | Patient123D | Patient201E |
| 11606 | Patient123D | Patient252F |
| 11606 | Patient127B | Patient145A |
| 11606 | Patient145A | Patient201E |
| 11606 | Patient184  | Patient230F |
| 11606 | Patient201A | Patient230B |
| 11606 | Patient230E | Patient247A |
| 11606 | Patient230F | Patient246A |
| 11606 | Patient230F | Patient263B |
| 11607 | Patient026A | Patient127B |
| 11607 | Patient026B | Patient189E |
| 11607 | Patient026B | Patient196D |
| 11607 | Patient026B | Patient247E |
| 11607 | Patient034B | Patient247A |
| 11607 | Patient034D | Patient246E |
| 11607 | Patient066D | Patient149B |
| 11607 | Patient066D | Patient201A |
| 11607 | Patient066E | Patient247E |
| 11607 | Patient066F | Patient149B |
| 11607 | Patient066F | Patient201A |

|       |             |             |
|-------|-------------|-------------|
| 11607 | Patient074D | Patient232D |
| 11607 | Patient092A | Patient157  |
| 11607 | Patient097A | Patient192D |
| 11607 | Patient108D | Patient145A |
| 11607 | Patient108F | Patient123D |
| 11607 | Patient120A | Patient263A |
| 11607 | Patient123C | Patient184  |
| 11607 | Patient123D | Patient127B |
| 11607 | Patient126C | Patient220A |
| 11607 | Patient141A | Patient247B |
| 11607 | Patient141A | Patient247C |
| 11607 | Patient141B | Patient247A |
| 11607 | Patient141C | Patient247B |
| 11607 | Patient141C | Patient247C |
| 11607 | Patient192E | Patient247D |
| 11607 | Patient230A | Patient246D |
| 11607 | Patient230F | Patient246C |
| 11607 | Patient246B | Patient261D |
| 11608 | Patient026B | Patient149B |
| 11608 | Patient026B | Patient189A |
| 11608 | Patient026B | Patient201A |
| 11608 | Patient066D | Patient196D |
| 11608 | Patient066E | Patient149B |
| 11608 | Patient066E | Patient201A |
| 11608 | Patient123C | Patient246B |
| 11608 | Patient196D | Patient230B |
| 11608 | Patient230A | Patient246E |
| 11608 | Patient230B | Patient246A |
| 11608 | Patient230B | Patient263B |
| 11608 | Patient230E | Patient246B |
| 11608 | Patient230E | Patient247B |
| 11608 | Patient230E | Patient247C |
| 11608 | Patient247A | Patient261B |
| 11609 | Patient026A | Patient196D |
| 11609 | Patient026A | Patient247E |
| 11609 | Patient026B | Patient189B |
| 11609 | Patient034B | Patient247B |
| 11609 | Patient034B | Patient247C |
| 11609 | Patient066D | Patient184  |
| 11609 | Patient066D | Patient246A |
| 11609 | Patient066E | Patient196D |
| 11609 | Patient066F | Patient184  |
| 11609 | Patient066F | Patient246A |
| 11609 | Patient079C | Patient161B |
| 11609 | Patient092A | Patient159  |
| 11609 | Patient099E | Patient126C |
| 11609 | Patient108A | Patient235A |
| 11609 | Patient108D | Patient123D |
| 11609 | Patient123A | Patient247A |
| 11609 | Patient123B | Patient184  |



|       |              |             |
|-------|--------------|-------------|
| 11609 | Patient123D  | Patient149B |
| 11609 | Patient141B  | Patient247B |
| 11609 | Patient141B  | Patient247C |
| 11609 | Patient141C  | Patient246E |
| 11609 | Patient145A  | Patient149B |
| 11609 | Patient145A  | Patient201A |
| 11609 | Patient184   | Patient230B |
| 11609 | Patient247C  | Patient261B |
| 11610 | Patient026A  | Patient149B |
| 11610 | Patient026A  | Patient189E |
| 11610 | Patient026A  | Patient201A |
| 11610 | Patient026B  | Patient184  |
| 11610 | Patient026B  | Patient246A |
| 11610 | Patient026B  | Patient246C |
| 11610 | Patient026F  | Patient246B |
| 11610 | Patient034B  | Patient246D |
| 11610 | Patient066D  | Patient246C |
| 11610 | Patient066D  | Patient263B |
| 11610 | Patient066E  | Patient184  |
| 11610 | Patient066E  | Patient246A |
| 11610 | Patient066F  | Patient246C |
| 11610 | Patient066F  | Patient263B |
| 11610 | Patient074E  | Patient232D |
| 11610 | Patient079A1 | Patient161B |
| 11610 | Patient092E  | Patient159  |
| 11610 | Patient092G  | Patient184  |
| 11610 | Patient109C  | Patient235A |
| 11610 | Patient123A  | Patient246D |
| 11610 | Patient123B  | Patient246B |
| 11610 | Patient123D  | Patient201A |
| 11610 | Patient123D  | Patient247E |
| 11610 | Patient141A  | Patient246E |
| 11610 | Patient141C  | Patient246D |
| 11610 | Patient173B  | Patient246B |
| 11610 | Patient230B  | Patient246C |
| 11610 | Patient246D  | Patient261B |
| 11610 | Patient246E  | Patient261B |
| 11610 | Patient247B  | Patient261B |
| 11611 | Patient023   | Patient181B |
| 11611 | Patient026A  | Patient184  |
| 11611 | Patient026A  | Patient189A |
| 11611 | Patient026B  | Patient263B |
| 11611 | Patient034B  | Patient246E |
| 11611 | Patient066E  | Patient246C |
| 11611 | Patient066E  | Patient263B |
| 11611 | Patient123A  | Patient247B |
| 11611 | Patient123A  | Patient247C |
| 11611 | Patient126C  | Patient222B |
| 11611 | Patient141A  | Patient246D |
| 11611 | Patient145A  | Patient246A |

|       |              |             |
|-------|--------------|-------------|
| 11611 | Patient181B  | Patient246A |
| 11611 | Patient230F  | Patient246B |
| 11612 | Patient026A  | Patient189B |
| 11612 | Patient026A  | Patient246A |
| 11612 | Patient026A  | Patient246C |
| 11612 | Patient074C  | Patient196F |
| 11612 | Patient079A2 | Patient161B |
| 11612 | Patient092B  | Patient157  |
| 11612 | Patient097D  | Patient192D |
| 11612 | Patient123A  | Patient246E |
| 11612 | Patient123C  | Patient247A |
| 11612 | Patient123D  | Patient246A |
| 11612 | Patient123D  | Patient246C |
| 11612 | Patient126C  | Patient218A |
| 11612 | Patient141B  | Patient246D |
| 11612 | Patient141B  | Patient246E |
| 11612 | Patient145A  | Patient196D |
| 11612 | Patient145A  | Patient246C |
| 11612 | Patient145A  | Patient263B |
| 11612 | Patient224B  | Patient246A |
| 11612 | Patient247A  | Patient261D |
| 11613 | Patient023   | Patient173A |
| 11613 | Patient026A  | Patient263B |
| 11613 | Patient026C  | Patient045D |
| 11613 | Patient026F  | Patient247A |
| 11613 | Patient074B  | Patient196F |
| 11613 | Patient074C  | Patient222C |
| 11613 | Patient079B  | Patient150B |
| 11613 | Patient079C  | Patient220B |
| 11613 | Patient108G  | Patient235A |
| 11613 | Patient109D  | Patient235A |
| 11613 | Patient123C  | Patient246D |
| 11613 | Patient123D  | Patient196D |
| 11613 | Patient123D  | Patient263B |
| 11613 | Patient159   | Patient195  |
| 11613 | Patient181A  | Patient246A |
| 11613 | Patient246D  | Patient261D |
| 11613 | Patient247C  | Patient261D |
| 11614 | Patient023   | Patient181A |
| 11614 | Patient066D  | Patient246B |
| 11614 | Patient066F  | Patient246B |
| 11614 | Patient074A  | Patient196F |
| 11614 | Patient074B  | Patient222C |
| 11614 | Patient074D  | Patient196F |
| 11614 | Patient103D  | Patient247D |
| 11614 | Patient108H  | Patient235A |
| 11614 | Patient109E  | Patient235A |
| 11614 | Patient123B  | Patient247A |
| 11614 | Patient123C  | Patient247B |
| 11614 | Patient123C  | Patient247C |

|       |              |             |
|-------|--------------|-------------|
| 11614 | Patient126C  | Patient236B |
| 11614 | Patient145A  | Patient184  |
| 11614 | Patient230B  | Patient246B |
| 11614 | Patient230F  | Patient247A |
| 11614 | Patient246E  | Patient261D |
| 11614 | Patient247B  | Patient261D |
| 11615 | Patient026A  | Patient045D |
| 11615 | Patient026B  | Patient246B |
| 11615 | Patient026F  | Patient247B |
| 11615 | Patient026F  | Patient247C |
| 11615 | Patient066E  | Patient246B |
| 11615 | Patient074A  | Patient222C |
| 11615 | Patient074D  | Patient222C |
| 11615 | Patient092B  | Patient159  |
| 11615 | Patient120D  | Patient126D |
| 11615 | Patient123B  | Patient246D |
| 11615 | Patient123C  | Patient246E |
| 11615 | Patient126C  | Patient218B |
| 11615 | Patient173B  | Patient246D |
| 11615 | Patient230E  | Patient246D |
| 11615 | Patient230E  | Patient246E |
| 11615 | Patient230F  | Patient247B |
| 11615 | Patient230F  | Patient247C |
| 11616 | Patient097B  | Patient192D |
| 11616 | Patient123B  | Patient247B |
| 11616 | Patient123B  | Patient247C |
| 11616 | Patient123D  | Patient184  |
| 11616 | Patient145A  | Patient246B |
| 11616 | Patient230B  | Patient247A |
| 11617 | Patient026A  | Patient246B |
| 11617 | Patient026B  | Patient247A |
| 11617 | Patient026F  | Patient246D |
| 11617 | Patient026F  | Patient246E |
| 11617 | Patient092G  | Patient247A |
| 11617 | Patient123B  | Patient246E |
| 11617 | Patient123D  | Patient246B |
| 11617 | Patient173B  | Patient246E |
| 11617 | Patient230F  | Patient246D |
| 11618 | Patient021A2 | Patient126C |
| 11618 | Patient026B  | Patient045D |
| 11618 | Patient026F  | Patient045D |
| 11618 | Patient074E  | Patient196F |
| 11618 | Patient079A1 | Patient220B |
| 11618 | Patient079A2 | Patient220B |
| 11618 | Patient092G  | Patient247B |
| 11618 | Patient097C  | Patient192D |
| 11618 | Patient103A  | Patient246A |
| 11618 | Patient120B  | Patient126D |
| 11618 | Patient126C  | Patient187  |
| 11618 | Patient181B  | Patient247A |

|       |              |             |
|-------|--------------|-------------|
| 11618 | Patient230B  | Patient247B |
| 11618 | Patient230B  | Patient247C |
| 11618 | Patient230F  | Patient246E |
| 11619 | Patient021A1 | Patient126C |
| 11619 | Patient026A  | Patient247A |
| 11619 | Patient026B  | Patient247B |
| 11619 | Patient026B  | Patient247C |
| 11619 | Patient066D  | Patient247A |
| 11619 | Patient066F  | Patient247A |
| 11619 | Patient074E  | Patient222C |
| 11619 | Patient079B  | Patient161B |
| 11619 | Patient092G  | Patient247C |
| 11619 | Patient109A  | Patient235A |
| 11619 | Patient145A  | Patient247A |
| 11619 | Patient192A  | Patient213B |
| 11619 | Patient192F  | Patient247D |
| 11619 | Patient230B  | Patient246E |
| 11620 | Patient026B  | Patient246D |
| 11620 | Patient045D  | Patient066D |
| 11620 | Patient045D  | Patient066E |
| 11620 | Patient066D  | Patient246D |
| 11620 | Patient066F  | Patient246D |
| 11620 | Patient092G  | Patient246C |
| 11620 | Patient103E  | Patient247D |
| 11620 | Patient109B  | Patient235A |
| 11620 | Patient181A  | Patient247A |
| 11620 | Patient181B  | Patient247B |
| 11620 | Patient181B  | Patient247C |
| 11620 | Patient192C  | Patient213B |
| 11620 | Patient224B  | Patient247A |
| 11620 | Patient230B  | Patient246D |
| 11621 | Patient023   | Patient235C |
| 11621 | Patient026A  | Patient247B |
| 11621 | Patient026C  | Patient097A |
| 11621 | Patient026C  | Patient097E |
| 11621 | Patient066D  | Patient246E |
| 11621 | Patient066D  | Patient247B |
| 11621 | Patient066D  | Patient247C |
| 11621 | Patient066E  | Patient246D |
| 11621 | Patient066E  | Patient247A |
| 11621 | Patient066F  | Patient246E |
| 11621 | Patient066F  | Patient247B |
| 11621 | Patient079C  | Patient121A |
| 11621 | Patient092G  | Patient246A |
| 11621 | Patient097A  | Patient258E |
| 11621 | Patient097E  | Patient258E |
| 11621 | Patient104B  | Patient192C |
| 11621 | Patient108F  | Patient235A |
| 11621 | Patient123D  | Patient247A |
| 11621 | Patient145A  | Patient247B |

|       |              |             |
|-------|--------------|-------------|
| 11621 | Patient145A  | Patient247C |
| 11622 | Patient026A  | Patient246D |
| 11622 | Patient026A  | Patient247C |
| 11622 | Patient026B  | Patient246E |
| 11622 | Patient045D  | Patient066F |
| 11622 | Patient066E  | Patient246E |
| 11622 | Patient066E  | Patient247B |
| 11622 | Patient066E  | Patient247C |
| 11622 | Patient066F  | Patient247C |
| 11622 | Patient079C  | Patient121B |
| 11622 | Patient099B  | Patient126C |
| 11622 | Patient108A  | Patient220B |
| 11622 | Patient120C  | Patient126D |
| 11622 | Patient123D  | Patient246D |
| 11622 | Patient145A  | Patient246D |
| 11622 | Patient181A  | Patient247B |
| 11622 | Patient181A  | Patient247C |
| 11622 | Patient192B  | Patient213B |
| 11622 | Patient224B  | Patient247B |
| 11622 | Patient224B  | Patient247C |
| 11623 | Patient023   | Patient195  |
| 11623 | Patient074C  | Patient263A |
| 11623 | Patient092H  | Patient247D |
| 11623 | Patient099A  | Patient126C |
| 11623 | Patient100A  | Patient126A |
| 11623 | Patient104B  | Patient192A |
| 11623 | Patient104B  | Patient192B |
| 11623 | Patient108D  | Patient235A |
| 11623 | Patient123D  | Patient247B |
| 11623 | Patient123D  | Patient247C |
| 11623 | Patient126C  | Patient236A |
| 11623 | Patient145A  | Patient246E |
| 11624 | Patient026A  | Patient246E |
| 11624 | Patient074B  | Patient263A |
| 11624 | Patient079A1 | Patient121A |
| 11624 | Patient079B  | Patient220B |
| 11624 | Patient099C  | Patient126C |
| 11624 | Patient123D  | Patient246E |
| 11624 | Patient126A  | Patient246A |
| 11624 | Patient126C  | Patient222F |
| 11624 | Patient192C  | Patient252D |
| 11625 | Patient026C  | Patient097D |
| 11625 | Patient074A  | Patient263A |
| 11625 | Patient074D  | Patient263A |
| 11625 | Patient079A1 | Patient121B |
| 11625 | Patient079A2 | Patient121A |
| 11625 | Patient092G  | Patient246B |
| 11625 | Patient104A  | Patient192C |
| 11625 | Patient108B1 | Patient220B |
| 11625 | Patient109C  | Patient220B |

|       |              |             |
|-------|--------------|-------------|
| 11625 | Patient121A  | Patient252A |
| 11625 | Patient126C  | Patient196C |
| 11625 | Patient192A  | Patient252D |
| 11626 | Patient023   | Patient224B |
| 11626 | Patient045D  | Patient126C |
| 11626 | Patient079A2 | Patient121B |
| 11626 | Patient097D  | Patient258E |
| 11626 | Patient103A  | Patient247A |
| 11626 | Patient104A  | Patient192A |
| 11626 | Patient108B2 | Patient220B |
| 11626 | Patient121B  | Patient252A |
| 11626 | Patient126C  | Patient196A |
| 11626 | Patient126C  | Patient222A |
| 11626 | Patient126C  | Patient222E |
| 11627 | Patient021A2 | Patient103A |
| 11627 | Patient023   | Patient235B |
| 11627 | Patient099D  | Patient126C |
| 11627 | Patient104A  | Patient192B |
| 11627 | Patient108G  | Patient220B |
| 11627 | Patient109E  | Patient220B |
| 11627 | Patient120D  | Patient157  |
| 11627 | Patient121A  | Patient252B |
| 11627 | Patient126C  | Patient196E |
| 11627 | Patient126C  | Patient222D |
| 11627 | Patient126C  | Patient265  |
| 11628 | Patient103A  | Patient247B |
| 11628 | Patient103A  | Patient247C |
| 11628 | Patient108B2 | Patient235C |
| 11628 | Patient121B  | Patient252B |
| 11628 | Patient126C  | Patient196B |
| 11628 | Patient181A  | Patient247E |
| 11628 | Patient192A  | Patient220A |
| 11628 | Patient192E  | Patient213B |
| 11628 | Patient224B  | Patient247E |
| 11628 | Patient252A  | Patient258E |
| 11629 | Patient021A1 | Patient103A |
| 11629 | Patient074E  | Patient263A |
| 11629 | Patient100A  | Patient120D |
| 11629 | Patient108B1 | Patient235C |
| 11629 | Patient108H  | Patient220B |
| 11629 | Patient109D  | Patient220B |
| 11629 | Patient159   | Patient224B |
| 11629 | Patient192C  | Patient220A |
| 11630 | Patient026C  | Patient097B |
| 11630 | Patient092G  | Patient246D |
| 11630 | Patient100A  | Patient103B |
| 11630 | Patient104B  | Patient192E |
| 11630 | Patient126C  | Patient201B |
| 11630 | Patient181B  | Patient247E |
| 11630 | Patient192B  | Patient252D |

|       |              |             |
|-------|--------------|-------------|
| 11630 | Patient224A  | Patient246A |
| 11630 | Patient252B  | Patient258E |
| 11631 | Patient097B  | Patient258E |
| 11631 | Patient097E  | Patient220B |
| 11631 | Patient100A  | Patient103C |
| 11631 | Patient109A  | Patient220B |
| 11631 | Patient109B  | Patient220B |
| 11631 | Patient126C  | Patient127A |
| 11631 | Patient159   | Patient181A |
| 11631 | Patient192B  | Patient220A |
| 11632 | Patient026C  | Patient097C |
| 11632 | Patient092G  | Patient246E |
| 11632 | Patient097A  | Patient220B |
| 11632 | Patient121A  | Patient252F |
| 11632 | Patient126A  | Patient247A |
| 11632 | Patient126C  | Patient127B |
| 11633 | Patient097A  | Patient121A |
| 11633 | Patient097A  | Patient121B |
| 11633 | Patient097C  | Patient258E |
| 11633 | Patient097E  | Patient121B |
| 11633 | Patient103B  | Patient131  |
| 11633 | Patient108B2 | Patient235B |
| 11633 | Patient121B  | Patient252F |
| 11633 | Patient126C  | Patient201E |
| 11633 | Patient192E  | Patient252D |
| 11634 | Patient092E  | Patient247D |
| 11634 | Patient099E  | Patient192A |
| 11634 | Patient103A  | Patient247E |
| 11634 | Patient104A  | Patient192E |
| 11634 | Patient108B1 | Patient235B |
| 11634 | Patient120A  | Patient236B |
| 11634 | Patient126A  | Patient247B |
| 11634 | Patient126A  | Patient247C |
| 11634 | Patient126C  | Patient196D |
| 11635 | Patient079B  | Patient121A |
| 11635 | Patient092A  | Patient247D |
| 11635 | Patient103A  | Patient159  |
| 11635 | Patient103C  | Patient131  |
| 11635 | Patient108F  | Patient220B |
| 11635 | Patient120B  | Patient157  |
| 11635 | Patient126C  | Patient149B |
| 11635 | Patient126C  | Patient247E |
| 11635 | Patient159   | Patient181B |
| 11635 | Patient252F  | Patient258E |
| 11636 | Patient023   | Patient126A |
| 11636 | Patient079B  | Patient121B |
| 11636 | Patient108A  | Patient192A |
| 11636 | Patient108D  | Patient220B |
| 11636 | Patient126C  | Patient246C |
| 11637 | Patient099E  | Patient192C |

|       |              |             |
|-------|--------------|-------------|
| 11637 | Patient108A  | Patient192C |
| 11637 | Patient126C  | Patient201A |
| 11637 | Patient126C  | Patient246A |
| 11637 | Patient192A  | Patient218A |
| 11637 | Patient192E  | Patient220A |
| 11638 | Patient097A  | Patient192A |
| 11638 | Patient097A  | Patient192C |
| 11638 | Patient097D  | Patient121A |
| 11638 | Patient097D  | Patient121B |
| 11638 | Patient104B  | Patient120A |
| 11638 | Patient108B1 | Patient181B |
| 11638 | Patient108B2 | Patient181B |
| 11638 | Patient120A  | Patient213B |
| 11638 | Patient126C  | Patient263B |
| 11638 | Patient173A  | Patient213B |
| 11638 | Patient224A  | Patient247A |
| 11639 | Patient097E  | Patient121A |
| 11639 | Patient097E  | Patient192A |
| 11639 | Patient097E  | Patient192C |
| 11639 | Patient103B  | Patient246A |
| 11639 | Patient192A  | Patient236B |
| 11639 | Patient192C  | Patient236B |
| 11640 | Patient079C  | Patient235A |
| 11640 | Patient097A  | Patient235C |
| 11640 | Patient097B  | Patient220B |
| 11640 | Patient097D  | Patient220B |
| 11640 | Patient103C  | Patient246A |
| 11640 | Patient108B1 | Patient181A |
| 11640 | Patient108B2 | Patient181A |
| 11640 | Patient109C  | Patient192A |
| 11640 | Patient120C  | Patient157  |
| 11640 | Patient192C  | Patient218A |
| 11640 | Patient224A  | Patient247B |
| 11640 | Patient224A  | Patient247C |
| 11641 | Patient092B  | Patient247D |
| 11641 | Patient097C  | Patient220B |
| 11641 | Patient097E  | Patient192B |
| 11641 | Patient097E  | Patient235C |
| 11641 | Patient099E  | Patient192B |
| 11641 | Patient108B1 | Patient173A |
| 11641 | Patient108G  | Patient192A |
| 11641 | Patient108G  | Patient192C |
| 11641 | Patient109C  | Patient192C |
| 11641 | Patient120A  | Patient252D |
| 11641 | Patient192B  | Patient236B |
| 11641 | Patient192F  | Patient213B |
| 11642 | Patient097B  | Patient121A |
| 11642 | Patient097B  | Patient121B |
| 11642 | Patient097D  | Patient192A |
| 11642 | Patient100A  | Patient120B |



|       |              |             |
|-------|--------------|-------------|
| 11642 | Patient104A  | Patient120A |
| 11642 | Patient104B  | Patient173A |
| 11642 | Patient104B  | Patient192F |
| 11642 | Patient108B2 | Patient173A |
| 11642 | Patient108H  | Patient192A |
| 11642 | Patient109E  | Patient192A |
| 11642 | Patient120A  | Patient222B |
| 11642 | Patient126C  | Patient246B |
| 11642 | Patient192A  | Patient218B |
| 11642 | Patient192B  | Patient218A |
| 11642 | Patient192C  | Patient218B |
| 11643 | Patient079A1 | Patient235A |
| 11643 | Patient079A2 | Patient235A |
| 11643 | Patient092H  | Patient213B |
| 11643 | Patient097A  | Patient192B |
| 11643 | Patient097E  | Patient217A |
| 11643 | Patient108A  | Patient192B |
| 11643 | Patient108H  | Patient192C |
| 11643 | Patient109C  | Patient192B |
| 11643 | Patient173A  | Patient252D |
| 11643 | Patient189B  | Patient195  |
| 11644 | Patient045D  | Patient192D |
| 11644 | Patient079C  | Patient192A |
| 11644 | Patient097A  | Patient217A |
| 11644 | Patient097A  | Patient217C |
| 11644 | Patient097D  | Patient192C |
| 11644 | Patient099E  | Patient192E |
| 11644 | Patient108G  | Patient192B |
| 11644 | Patient109E  | Patient192B |
| 11644 | Patient109E  | Patient192C |
| 11644 | Patient120D  | Patient247D |
| 11644 | Patient126C  | Patient184  |
| 11644 | Patient173A  | Patient236B |
| 11644 | Patient187   | Patient192A |
| 11644 | Patient189A  | Patient195  |
| 11644 | Patient192B  | Patient218B |
| 11645 | Patient079C  | Patient192C |
| 11645 | Patient097A  | Patient217B |
| 11645 | Patient097A  | Patient217E |
| 11645 | Patient097A  | Patient217F |
| 11645 | Patient097A  | Patient217H |
| 11645 | Patient097C  | Patient121A |
| 11645 | Patient097C  | Patient121B |
| 11645 | Patient097E  | Patient217C |
| 11645 | Patient108H  | Patient192B |
| 11645 | Patient126A  | Patient159  |
| 11645 | Patient126A  | Patient247E |
| 11645 | Patient126C  | Patient247A |
| 11645 | Patient173A  | Patient222B |
| 11645 | Patient187   | Patient192C |

|       |              |             |
|-------|--------------|-------------|
| 11645 | Patient189E  | Patient195  |
| 11645 | Patient192F  | Patient252D |
| 11646 | Patient026C  | Patient252A |
| 11646 | Patient092H  | Patient104B |
| 11646 | Patient097A  | Patient217D |
| 11646 | Patient097A  | Patient217I |
| 11646 | Patient097A  | Patient235B |
| 11646 | Patient097E  | Patient217B |
| 11646 | Patient097E  | Patient217E |
| 11646 | Patient097E  | Patient217F |
| 11646 | Patient097E  | Patient217H |
| 11646 | Patient100A  | Patient120C |
| 11646 | Patient104A  | Patient173A |
| 11646 | Patient104A  | Patient192F |
| 11646 | Patient108A  | Patient192D |
| 11646 | Patient108A  | Patient192E |
| 11646 | Patient109D  | Patient192A |
| 11646 | Patient120A  | Patient236A |
| 11646 | Patient192A  | Patient222B |
| 11647 | Patient079A1 | Patient192A |
| 11647 | Patient079A1 | Patient192C |
| 11647 | Patient092H  | Patient252D |
| 11647 | Patient097A  | Patient192E |
| 11647 | Patient097B  | Patient192A |
| 11647 | Patient097B  | Patient192C |
| 11647 | Patient097D  | Patient235C |
| 11647 | Patient097E  | Patient192E |
| 11647 | Patient097E  | Patient217D |
| 11647 | Patient097E  | Patient217I |
| 11647 | Patient097E  | Patient235B |
| 11647 | Patient103B  | Patient247A |
| 11647 | Patient109A  | Patient192A |
| 11647 | Patient109D  | Patient192C |
| 11647 | Patient126C  | Patient246D |
| 11647 | Patient126C  | Patient247B |
| 11647 | Patient126C  | Patient247C |
| 11647 | Patient187   | Patient192B |
| 11647 | Patient192A  | Patient252A |
| 11647 | Patient192E  | Patient218A |
| 11648 | Patient026C  | Patient252B |
| 11648 | Patient079A2 | Patient192A |
| 11648 | Patient079A2 | Patient192C |
| 11648 | Patient079C  | Patient192B |
| 11648 | Patient099B  | Patient192A |
| 11648 | Patient103C  | Patient247A |
| 11648 | Patient108B1 | Patient120A |
| 11648 | Patient108B2 | Patient120A |
| 11648 | Patient109A  | Patient192C |
| 11648 | Patient109B  | Patient192A |
| 11648 | Patient109B  | Patient192C |

|       |              |             |
|-------|--------------|-------------|
| 11648 | Patient120A  | Patient196D |
| 11648 | Patient120A  | Patient222F |
| 11648 | Patient120A  | Patient265  |
| 11648 | Patient131   | Patient224A |
| 11648 | Patient192A  | Patient196A |
| 11648 | Patient192A  | Patient196C |
| 11648 | Patient192C  | Patient196C |
| 11648 | Patient192C  | Patient222B |
| 11648 | Patient192C  | Patient252A |
| 11648 | Patient192E  | Patient236B |
| 11648 | Patient224A  | Patient247E |
| 11649 | Patient079A1 | Patient192B |
| 11649 | Patient079B  | Patient235A |
| 11649 | Patient097B  | Patient192B |
| 11649 | Patient097B  | Patient235C |
| 11649 | Patient097D  | Patient192B |
| 11649 | Patient097D  | Patient217A |
| 11649 | Patient097D  | Patient217C |
| 11649 | Patient097D  | Patient217H |
| 11649 | Patient099A  | Patient192A |
| 11649 | Patient099B  | Patient192C |
| 11649 | Patient103B  | Patient247B |
| 11649 | Patient103B  | Patient247C |
| 11649 | Patient109C  | Patient192E |
| 11649 | Patient109D  | Patient192B |
| 11649 | Patient120A  | Patient222A |
| 11649 | Patient126C  | Patient246E |
| 11649 | Patient159   | Patient224A |
| 11649 | Patient189E  | Patient192A |
| 11649 | Patient189E  | Patient192C |
| 11649 | Patient192A  | Patient222F |
| 11649 | Patient192A  | Patient236A |
| 11649 | Patient192C  | Patient196A |
| 11650 | Patient079A2 | Patient192B |
| 11650 | Patient092H  | Patient104A |
| 11650 | Patient097C  | Patient192A |
| 11650 | Patient097C  | Patient192C |
| 11650 | Patient097D  | Patient217B |
| 11650 | Patient097D  | Patient217E |
| 11650 | Patient097D  | Patient217F |
| 11650 | Patient099A  | Patient192C |
| 11650 | Patient099C  | Patient192A |
| 11650 | Patient103C  | Patient247B |
| 11650 | Patient103C  | Patient247C |
| 11650 | Patient108G  | Patient192E |
| 11650 | Patient109B  | Patient192B |
| 11650 | Patient109E  | Patient192E |
| 11650 | Patient120A  | Patient196C |
| 11650 | Patient189A  | Patient192A |
| 11650 | Patient189A  | Patient192C |

|       |             |             |
|-------|-------------|-------------|
| 11650 | Patient192A | Patient196B |
| 11650 | Patient192A | Patient196E |
| 11650 | Patient192A | Patient252B |
| 11650 | Patient192B | Patient196C |
| 11650 | Patient192B | Patient252A |
| 11650 | Patient192C | Patient222F |
| 11650 | Patient192C | Patient236A |
| 11650 | Patient192C | Patient252B |
| 11650 | Patient192E | Patient218B |
| 11650 | Patient192F | Patient220A |
| 11651 | Patient097B | Patient217A |
| 11651 | Patient097D | Patient217D |
| 11651 | Patient097D | Patient217I |
| 11651 | Patient099B | Patient192B |
| 11651 | Patient099C | Patient192C |
| 11651 | Patient099E | Patient120A |
| 11651 | Patient108F | Patient192A |
| 11651 | Patient108F | Patient192C |
| 11651 | Patient108H | Patient192E |
| 11651 | Patient109A | Patient192B |
| 11651 | Patient120A | Patient196A |
| 11651 | Patient120A | Patient220A |
| 11651 | Patient120A | Patient222E |
| 11651 | Patient120B | Patient247D |
| 11651 | Patient173A | Patient220A |
| 11651 | Patient189B | Patient192A |
| 11651 | Patient189E | Patient192B |
| 11651 | Patient192C | Patient196B |
| 11651 | Patient192C | Patient196E |
| 11652 | Patient097C | Patient235C |
| 11652 | Patient097D | Patient192E |
| 11652 | Patient097D | Patient235B |
| 11652 | Patient099A | Patient192B |
| 11652 | Patient108G | Patient192D |
| 11652 | Patient108H | Patient192D |
| 11652 | Patient109C | Patient192D |
| 11652 | Patient120C | Patient247D |
| 11652 | Patient189A | Patient192B |
| 11652 | Patient192A | Patient222A |
| 11652 | Patient192B | Patient196A |
| 11652 | Patient192B | Patient222B |
| 11652 | Patient192B | Patient222F |
| 11652 | Patient192B | Patient236A |
| 11652 | Patient192B | Patient252B |
| 11652 | Patient192C | Patient222A |
| 11652 | Patient192D | Patient252A |
| 11653 | Patient026C | Patient252F |
| 11653 | Patient045D | Patient217A |
| 11653 | Patient045D | Patient217C |
| 11653 | Patient079C | Patient192E |

|       |              |             |
|-------|--------------|-------------|
| 11653 | Patient097B  | Patient217C |
| 11653 | Patient097C  | Patient192B |
| 11653 | Patient099C  | Patient192B |
| 11653 | Patient108D  | Patient192A |
| 11653 | Patient108D  | Patient192C |
| 11653 | Patient108F  | Patient192B |
| 11653 | Patient120A  | Patient196B |
| 11653 | Patient120A  | Patient196E |
| 11653 | Patient173A  | Patient218A |
| 11653 | Patient189B  | Patient192B |
| 11653 | Patient189B  | Patient192C |
| 11653 | Patient192A  | Patient222E |
| 11653 | Patient192A  | Patient265  |
| 11653 | Patient192B  | Patient196B |
| 11653 | Patient192B  | Patient196E |
| 11653 | Patient192B  | Patient222A |
| 11653 | Patient192C  | Patient222E |
| 11654 | Patient045D  | Patient195  |
| 11654 | Patient045D  | Patient217B |
| 11654 | Patient045D  | Patient217E |
| 11654 | Patient045D  | Patient217F |
| 11654 | Patient045D  | Patient217H |
| 11654 | Patient079C  | Patient258E |
| 11654 | Patient092E  | Patient213B |
| 11654 | Patient097A  | Patient217J |
| 11654 | Patient097B  | Patient217B |
| 11654 | Patient097B  | Patient217E |
| 11654 | Patient097B  | Patient217F |
| 11654 | Patient097B  | Patient217H |
| 11654 | Patient097C  | Patient217A |
| 11654 | Patient099E  | Patient173A |
| 11654 | Patient120A  | Patient201B |
| 11654 | Patient120A  | Patient218A |
| 11654 | Patient173A  | Patient236A |
| 11654 | Patient187   | Patient192E |
| 11654 | Patient192C  | Patient265  |
| 11655 | Patient045D  | Patient217D |
| 11655 | Patient079A1 | Patient192E |
| 11655 | Patient097B  | Patient192E |
| 11655 | Patient097B  | Patient217D |
| 11655 | Patient097B  | Patient217I |
| 11655 | Patient097B  | Patient235B |
| 11655 | Patient097E  | Patient217J |
| 11655 | Patient099D  | Patient192A |
| 11655 | Patient108D  | Patient192B |
| 11655 | Patient109D  | Patient192E |
| 11655 | Patient109E  | Patient192D |
| 11655 | Patient173A  | Patient196D |
| 11655 | Patient192A  | Patient222D |
| 11655 | Patient192A  | Patient252F |

|       |              |             |
|-------|--------------|-------------|
| 11655 | Patient192B  | Patient222E |
| 11655 | Patient192B  | Patient265  |
| 11655 | Patient192C  | Patient201B |
| 11655 | Patient192C  | Patient222D |
| 11655 | Patient192C  | Patient252F |
| 11655 | Patient192D  | Patient252B |
| 11655 | Patient192E  | Patient222B |
| 11656 | Patient045D  | Patient217I |
| 11656 | Patient079A2 | Patient192E |
| 11656 | Patient079B  | Patient192A |
| 11656 | Patient092A  | Patient213B |
| 11656 | Patient092H  | Patient220A |
| 11656 | Patient097C  | Patient217C |
| 11656 | Patient099D  | Patient192C |
| 11656 | Patient099E  | Patient192F |
| 11656 | Patient109A  | Patient192D |
| 11656 | Patient109A  | Patient192E |
| 11656 | Patient109B  | Patient192E |
| 11656 | Patient127A  | Patient192A |
| 11656 | Patient192A  | Patient201B |
| 11656 | Patient192E  | Patient252A |
| 11657 | Patient079A1 | Patient258E |
| 11657 | Patient079B  | Patient192C |
| 11657 | Patient097C  | Patient217B |
| 11657 | Patient097C  | Patient217E |
| 11657 | Patient097C  | Patient217F |
| 11657 | Patient097C  | Patient217H |
| 11657 | Patient099B  | Patient192E |
| 11657 | Patient103C  | Patient159  |
| 11657 | Patient103C  | Patient247E |
| 11657 | Patient120A  | Patient201E |
| 11657 | Patient127A  | Patient192C |
| 11657 | Patient127B  | Patient192A |
| 11657 | Patient173A  | Patient218B |
| 11657 | Patient173A  | Patient222A |
| 11657 | Patient173A  | Patient222F |
| 11657 | Patient189E  | Patient192E |
| 11657 | Patient192B  | Patient201B |
| 11657 | Patient192B  | Patient252F |
| 11658 | Patient045D  | Patient173B |
| 11658 | Patient079A2 | Patient258E |
| 11658 | Patient079B  | Patient192B |
| 11658 | Patient092E  | Patient104B |
| 11658 | Patient092H  | Patient099E |
| 11658 | Patient097C  | Patient192E |
| 11658 | Patient097C  | Patient217D |
| 11658 | Patient097C  | Patient217I |
| 11658 | Patient097C  | Patient235B |
| 11658 | Patient099A  | Patient192E |
| 11658 | Patient099D  | Patient192B |

|       |             |             |
|-------|-------------|-------------|
| 11658 | Patient108A | Patient192F |
| 11658 | Patient109D | Patient192D |
| 11658 | Patient127B | Patient192C |
| 11658 | Patient173A | Patient196A |
| 11658 | Patient189A | Patient192E |
| 11658 | Patient192A | Patient201E |
| 11658 | Patient192B | Patient222D |
| 11658 | Patient192E | Patient222F |
| 11659 | Patient092A | Patient104B |
| 11659 | Patient092A | Patient252D |
| 11659 | Patient097A | Patient192F |
| 11659 | Patient097D | Patient217J |
| 11659 | Patient097E | Patient192F |
| 11659 | Patient099C | Patient192E |
| 11659 | Patient103B | Patient247E |
| 11659 | Patient108A | Patient121A |
| 11659 | Patient108F | Patient192E |
| 11659 | Patient109B | Patient192D |
| 11659 | Patient120A | Patient149B |
| 11659 | Patient120A | Patient218B |
| 11659 | Patient127A | Patient192B |
| 11659 | Patient173A | Patient196C |
| 11659 | Patient173A | Patient222E |
| 11659 | Patient189B | Patient192E |
| 11659 | Patient192A | Patient196D |
| 11659 | Patient192A | Patient247E |
| 11659 | Patient192C | Patient201E |
| 11659 | Patient192E | Patient196C |
| 11659 | Patient192E | Patient222A |
| 11659 | Patient192E | Patient236A |
| 11659 | Patient192E | Patient252B |
| 11659 | Patient192F | Patient218A |
| 11659 | Patient195  | Patient213B |
| 11660 | Patient097A | Patient173B |
| 11660 | Patient097E | Patient173B |
| 11660 | Patient108A | Patient121B |
| 11660 | Patient108F | Patient192D |
| 11660 | Patient127B | Patient192B |
| 11660 | Patient173A | Patient201B |
| 11660 | Patient173A | Patient265  |
| 11660 | Patient181B | Patient189E |
| 11660 | Patient192B | Patient201E |
| 11660 | Patient192C | Patient196D |
| 11660 | Patient192C | Patient247E |
| 11660 | Patient192D | Patient252F |
| 11660 | Patient192E | Patient196A |
| 11660 | Patient192F | Patient236B |
| 11661 | Patient026C | Patient108A |
| 11661 | Patient092B | Patient213B |
| 11661 | Patient092E | Patient252D |

|       |              |             |
|-------|--------------|-------------|
| 11661 | Patient092H  | Patient218A |
| 11661 | Patient108D  | Patient192E |
| 11661 | Patient120A  | Patient246C |
| 11661 | Patient149B  | Patient192A |
| 11661 | Patient149B  | Patient192C |
| 11661 | Patient173A  | Patient187  |
| 11661 | Patient173A  | Patient196B |
| 11661 | Patient173A  | Patient196E |
| 11661 | Patient181B  | Patient189A |
| 11661 | Patient192E  | Patient222E |
| 11661 | Patient192E  | Patient265  |
| 11662 | Patient079C  | Patient092H |
| 11662 | Patient092E  | Patient104A |
| 11662 | Patient092H  | Patient097A |
| 11662 | Patient092H  | Patient097E |
| 11662 | Patient103B  | Patient159  |
| 11662 | Patient108G  | Patient192F |
| 11662 | Patient120A  | Patient201A |
| 11662 | Patient189E  | Patient224B |
| 11662 | Patient192A  | Patient201A |
| 11662 | Patient192B  | Patient196D |
| 11662 | Patient192E  | Patient196B |
| 11662 | Patient192E  | Patient196E |
| 11663 | Patient045D  | Patient217J |
| 11663 | Patient092A  | Patient104A |
| 11663 | Patient097B  | Patient217J |
| 11663 | Patient108D  | Patient192D |
| 11663 | Patient109C  | Patient192F |
| 11663 | Patient120A  | Patient187  |
| 11663 | Patient120A  | Patient263B |
| 11663 | Patient149B  | Patient192B |
| 11663 | Patient181B  | Patient189B |
| 11663 | Patient184   | Patient192A |
| 11663 | Patient184   | Patient192C |
| 11663 | Patient189A  | Patient224B |
| 11663 | Patient192A  | Patient246A |
| 11663 | Patient192A  | Patient263B |
| 11663 | Patient192C  | Patient201A |
| 11663 | Patient192C  | Patient246A |
| 11663 | Patient192E  | Patient201B |
| 11663 | Patient192E  | Patient252F |
| 11663 | Patient192F  | Patient218B |
| 11664 | Patient079A1 | Patient092H |
| 11664 | Patient079B  | Patient192E |
| 11664 | Patient092B  | Patient104B |
| 11664 | Patient092H  | Patient252A |
| 11664 | Patient097D  | Patient192F |
| 11664 | Patient099D  | Patient192E |
| 11664 | Patient104B  | Patient195  |
| 11664 | Patient108G  | Patient121A |



|       |              |             |
|-------|--------------|-------------|
| 11664 | Patient108H  | Patient192F |
| 11664 | Patient109C  | Patient121B |
| 11664 | Patient109E  | Patient192F |
| 11664 | Patient173A  | Patient222D |
| 11664 | Patient181A  | Patient189E |
| 11664 | Patient189B  | Patient224B |
| 11664 | Patient192A  | Patient246C |
| 11664 | Patient192B  | Patient201A |
| 11664 | Patient192C  | Patient263B |
| 11664 | Patient192E  | Patient222D |
| 11665 | Patient023   | Patient220B |
| 11665 | Patient026C  | Patient108G |
| 11665 | Patient026C  | Patient109C |
| 11665 | Patient079A2 | Patient092H |
| 11665 | Patient079B  | Patient258E |
| 11665 | Patient079C  | Patient192F |
| 11665 | Patient092B  | Patient252D |
| 11665 | Patient092H  | Patient218B |
| 11665 | Patient092H  | Patient236B |
| 11665 | Patient097D  | Patient173B |
| 11665 | Patient108G  | Patient121B |
| 11665 | Patient120A  | Patient246B |
| 11665 | Patient127A  | Patient192E |
| 11665 | Patient173A  | Patient201E |
| 11665 | Patient181A  | Patient189A |
| 11665 | Patient184   | Patient192B |
| 11665 | Patient187   | Patient192F |
| 11665 | Patient189E  | Patient224A |
| 11665 | Patient192B  | Patient246A |
| 11665 | Patient192B  | Patient247E |
| 11665 | Patient192C  | Patient246C |
| 11666 | Patient092H  | Patient097D |
| 11666 | Patient092H  | Patient108A |
| 11666 | Patient097C  | Patient217J |
| 11666 | Patient099A  | Patient120A |
| 11666 | Patient099B  | Patient120A |
| 11666 | Patient108H  | Patient121A |
| 11666 | Patient109E  | Patient121B |
| 11666 | Patient127B  | Patient192E |
| 11666 | Patient173A  | Patient189E |
| 11666 | Patient181A  | Patient189B |
| 11666 | Patient189A  | Patient224A |
| 11666 | Patient192B  | Patient263B |
| 11666 | Patient192E  | Patient201E |
| 11666 | Patient195   | Patient252D |
| 11667 | Patient026C  | Patient108H |
| 11667 | Patient026C  | Patient109E |
| 11667 | Patient092E  | Patient220A |
| 11667 | Patient092H  | Patient252B |
| 11667 | Patient104A  | Patient195  |

|       |              |             |
|-------|--------------|-------------|
| 11667 | Patient108H  | Patient121B |
| 11667 | Patient173A  | Patient189A |
| 11667 | Patient189B  | Patient224A |
| 11667 | Patient192B  | Patient246C |
| 11667 | Patient192F  | Patient222B |
| 11668 | Patient074C  | Patient157  |
| 11668 | Patient079A1 | Patient192F |
| 11668 | Patient092A  | Patient220A |
| 11668 | Patient092B  | Patient104A |
| 11668 | Patient092H  | Patient187  |
| 11668 | Patient097B  | Patient192F |
| 11668 | Patient099C  | Patient120A |
| 11668 | Patient108A  | Patient258E |
| 11668 | Patient108B1 | Patient224B |
| 11668 | Patient108B2 | Patient224B |
| 11668 | Patient109D  | Patient192F |
| 11668 | Patient120A  | Patient222D |
| 11668 | Patient149B  | Patient173A |
| 11668 | Patient173A  | Patient189B |
| 11668 | Patient173A  | Patient201A |
| 11668 | Patient192A  | Patient246B |
| 11668 | Patient192C  | Patient246B |
| 11668 | Patient192E  | Patient247E |
| 11669 | Patient074A  | Patient157  |
| 11669 | Patient074B  | Patient157  |
| 11669 | Patient079A2 | Patient192F |
| 11669 | Patient092H  | Patient109C |
| 11669 | Patient092H  | Patient222B |
| 11669 | Patient099B  | Patient173A |
| 11669 | Patient109B  | Patient192F |
| 11669 | Patient149B  | Patient192E |
| 11669 | Patient192F  | Patient196C |
| 11669 | Patient192F  | Patient252A |
| 11670 | Patient092E  | Patient099E |
| 11670 | Patient097B  | Patient173B |
| 11670 | Patient099A  | Patient173A |
| 11670 | Patient099B  | Patient192F |
| 11670 | Patient099C  | Patient173A |
| 11670 | Patient103D  | Patient246A |
| 11670 | Patient109A  | Patient121A |
| 11670 | Patient109A  | Patient192F |
| 11670 | Patient109B  | Patient121A |
| 11670 | Patient109D  | Patient121B |
| 11670 | Patient173A  | Patient246C |
| 11670 | Patient189E  | Patient192F |
| 11670 | Patient192B  | Patient246B |
| 11670 | Patient192E  | Patient201A |
| 11670 | Patient192F  | Patient196A |
| 11670 | Patient195   | Patient247A |
| 11671 | Patient026C  | Patient109D |

|       |             |             |
|-------|-------------|-------------|
| 11671 | Patient074D | Patient157  |
| 11671 | Patient092A | Patient099E |
| 11671 | Patient092H | Patient097B |
| 11671 | Patient092H | Patient108G |
| 11671 | Patient092H | Patient109E |
| 11671 | Patient097C | Patient192F |
| 11671 | Patient099A | Patient192F |
| 11671 | Patient109A | Patient121B |
| 11671 | Patient109B | Patient121B |
| 11671 | Patient120A | Patient189A |
| 11671 | Patient120A | Patient189E |
| 11671 | Patient120A | Patient246D |
| 11671 | Patient173A | Patient263B |
| 11671 | Patient184  | Patient192E |
| 11671 | Patient189A | Patient192F |
| 11671 | Patient192A | Patient247A |
| 11671 | Patient192C | Patient247A |
| 11671 | Patient192E | Patient196D |
| 11671 | Patient192E | Patient246A |
| 11671 | Patient192F | Patient236A |
| 11671 | Patient192F | Patient252B |
| 11671 | Patient195  | Patient247E |
| 11672 | Patient026C | Patient109A |
| 11672 | Patient079C | Patient092E |
| 11672 | Patient092H | Patient099B |
| 11672 | Patient092H | Patient108H |
| 11672 | Patient099C | Patient192F |
| 11672 | Patient103A | Patient189B |
| 11672 | Patient103A | Patient189E |
| 11672 | Patient108F | Patient192F |
| 11672 | Patient108G | Patient258E |
| 11672 | Patient109C | Patient121A |
| 11672 | Patient120A | Patient189B |
| 11672 | Patient189B | Patient192F |
| 11672 | Patient192E | Patient263B |
| 11672 | Patient192F | Patient196B |
| 11672 | Patient192F | Patient196E |
| 11672 | Patient192F | Patient222A |
| 11672 | Patient195  | Patient222B |
| 11672 | Patient195  | Patient247B |
| 11672 | Patient195  | Patient247C |
| 11673 | Patient026C | Patient109B |
| 11673 | Patient079B | Patient092H |
| 11673 | Patient092A | Patient097A |
| 11673 | Patient092A | Patient218A |
| 11673 | Patient092B | Patient220A |
| 11673 | Patient092E | Patient097A |
| 11673 | Patient092E | Patient097E |
| 11673 | Patient092E | Patient218A |
| 11673 | Patient092H | Patient252F |

|       |              |             |
|-------|--------------|-------------|
| 11673 | Patient097C  | Patient173B |
| 11673 | Patient099D  | Patient120A |
| 11673 | Patient103A  | Patient189A |
| 11673 | Patient108B1 | Patient126A |
| 11673 | Patient108B2 | Patient126A |
| 11673 | Patient108F  | Patient121A |
| 11673 | Patient108F  | Patient121B |
| 11673 | Patient120A  | Patient246E |
| 11673 | Patient181A  | Patient222B |
| 11673 | Patient181B  | Patient213B |
| 11673 | Patient192A  | Patient247B |
| 11673 | Patient192A  | Patient247C |
| 11673 | Patient192B  | Patient247A |
| 11673 | Patient192C  | Patient247B |
| 11673 | Patient192C  | Patient247C |
| 11673 | Patient192E  | Patient246C |
| 11673 | Patient192F  | Patient222E |
| 11673 | Patient192F  | Patient222F |
| 11673 | Patient222B  | Patient224B |
| 11674 | Patient026C  | Patient108F |
| 11674 | Patient079C  | Patient092A |
| 11674 | Patient092A  | Patient097E |
| 11674 | Patient092H  | Patient097C |
| 11674 | Patient092H  | Patient099A |
| 11674 | Patient092H  | Patient109D |
| 11674 | Patient092H  | Patient222F |
| 11674 | Patient103B  | Patient189E |
| 11674 | Patient108D  | Patient192F |
| 11674 | Patient108H  | Patient258E |
| 11674 | Patient109C  | Patient258E |
| 11674 | Patient109E  | Patient121A |
| 11674 | Patient192A  | Patient246E |
| 11674 | Patient192F  | Patient265  |
| 11675 | Patient074E  | Patient157  |
| 11675 | Patient079A1 | Patient092E |
| 11675 | Patient092H  | Patient222A |
| 11675 | Patient092H  | Patient236A |
| 11675 | Patient099D  | Patient173A |
| 11675 | Patient103B  | Patient189A |
| 11675 | Patient103B  | Patient189B |
| 11675 | Patient108B2 | Patient195  |
| 11675 | Patient108D  | Patient121A |
| 11675 | Patient120A  | Patient127A |
| 11675 | Patient127A  | Patient173A |
| 11675 | Patient173A  | Patient246B |
| 11675 | Patient181A  | Patient213B |
| 11675 | Patient192A  | Patient246D |
| 11675 | Patient192B  | Patient247B |
| 11675 | Patient192B  | Patient247C |
| 11675 | Patient192C  | Patient246D |

|       |              |             |
|-------|--------------|-------------|
| 11675 | Patient192C  | Patient246E |
| 11675 | Patient192F  | Patient201B |
| 11675 | Patient195   | Patient220A |
| 11675 | Patient213B  | Patient224B |
| 11676 | Patient079A1 | Patient092A |
| 11676 | Patient079A2 | Patient092E |
| 11676 | Patient092A  | Patient252A |
| 11676 | Patient092B  | Patient099E |
| 11676 | Patient092E  | Patient236B |
| 11676 | Patient092H  | Patient099C |
| 11676 | Patient092H  | Patient196C |
| 11676 | Patient103C  | Patient189B |
| 11676 | Patient103C  | Patient189E |
| 11676 | Patient103E  | Patient246A |
| 11676 | Patient108B1 | Patient195  |
| 11676 | Patient108D  | Patient121B |
| 11676 | Patient109E  | Patient258E |
| 11676 | Patient127B  | Patient173A |
| 11676 | Patient192E  | Patient246B |
| 11676 | Patient192F  | Patient222D |
| 11676 | Patient192F  | Patient252F |
| 11676 | Patient195   | Patient218A |
| 11677 | Patient026C  | Patient108D |
| 11677 | Patient079A2 | Patient092A |
| 11677 | Patient079B  | Patient192F |
| 11677 | Patient092A  | Patient236B |
| 11677 | Patient092E  | Patient097D |
| 11677 | Patient092E  | Patient108A |
| 11677 | Patient092E  | Patient218B |
| 11677 | Patient092E  | Patient252A |
| 11677 | Patient092H  | Patient109A |
| 11677 | Patient092H  | Patient189E |
| 11677 | Patient092H  | Patient196A |
| 11677 | Patient092H  | Patient265  |
| 11677 | Patient103C  | Patient189A |
| 11677 | Patient120A  | Patient127B |
| 11677 | Patient120D  | Patient131  |
| 11677 | Patient181B  | Patient222B |
| 11677 | Patient192B  | Patient246E |
| 11677 | Patient217A  | Patient252A |
| 11678 | Patient079C  | Patient217C |
| 11678 | Patient092A  | Patient108A |
| 11678 | Patient092B  | Patient097E |
| 11678 | Patient092B  | Patient218A |
| 11678 | Patient092H  | Patient222E |
| 11678 | Patient099D  | Patient192F |
| 11678 | Patient103D  | Patient247A |
| 11678 | Patient109D  | Patient121A |
| 11678 | Patient127A  | Patient192F |
| 11678 | Patient192B  | Patient246D |

|       |              |             |
|-------|--------------|-------------|
| 11679 | Patient021A2 | Patient103D |
| 11679 | Patient079C  | Patient092B |
| 11679 | Patient079C  | Patient217A |
| 11679 | Patient079C  | Patient217B |
| 11679 | Patient079C  | Patient217E |
| 11679 | Patient079C  | Patient217F |
| 11679 | Patient079C  | Patient217H |
| 11679 | Patient092A  | Patient097D |
| 11679 | Patient092A  | Patient218B |
| 11679 | Patient092B  | Patient097A |
| 11679 | Patient092E  | Patient109C |
| 11679 | Patient092E  | Patient187  |
| 11679 | Patient092H  | Patient099D |
| 11679 | Patient092H  | Patient109B |
| 11679 | Patient092H  | Patient189A |
| 11679 | Patient092H  | Patient189B |
| 11679 | Patient099E  | Patient195  |
| 11679 | Patient104B  | Patient181B |
| 11679 | Patient104B  | Patient224B |
| 11679 | Patient109A  | Patient258E |
| 11679 | Patient127B  | Patient192F |
| 11679 | Patient192E  | Patient247A |
| 11679 | Patient195   | Patient196D |
| 11679 | Patient217C  | Patient252A |
| 11680 | Patient079A1 | Patient217A |
| 11680 | Patient079C  | Patient217D |
| 11680 | Patient079C  | Patient217I |
| 11680 | Patient092A  | Patient109C |
| 11680 | Patient092A  | Patient222B |
| 11680 | Patient092A  | Patient252B |
| 11680 | Patient092E  | Patient222B |
| 11680 | Patient092E  | Patient252B |
| 11680 | Patient092H  | Patient108F |
| 11680 | Patient092H  | Patient196B |
| 11680 | Patient092H  | Patient196E |
| 11680 | Patient092H  | Patient201B |
| 11680 | Patient092H  | Patient222D |
| 11680 | Patient103D  | Patient247B |
| 11680 | Patient103D  | Patient247C |
| 11680 | Patient109B  | Patient258E |
| 11680 | Patient109D  | Patient258E |
| 11680 | Patient173A  | Patient246D |
| 11680 | Patient181B  | Patient236B |
| 11680 | Patient192F  | Patient201E |
| 11680 | Patient192F  | Patient247E |
| 11680 | Patient217A  | Patient252B |
| 11680 | Patient217B  | Patient252A |
| 11680 | Patient217E  | Patient252A |
| 11680 | Patient217F  | Patient252A |
| 11680 | Patient217H  | Patient252A |

|       |              |             |
|-------|--------------|-------------|
| 11680 | Patient224B  | Patient236B |
| 11681 | Patient021A1 | Patient103D |
| 11681 | Patient026C  | Patient079C |
| 11681 | Patient079A1 | Patient092B |
| 11681 | Patient079A1 | Patient217C |
| 11681 | Patient079A2 | Patient217A |
| 11681 | Patient092A  | Patient187  |
| 11681 | Patient092B  | Patient252A |
| 11681 | Patient092E  | Patient109E |
| 11681 | Patient092H  | Patient127A |
| 11681 | Patient103A  | Patient213B |
| 11681 | Patient103A  | Patient222B |
| 11681 | Patient104B  | Patient181A |
| 11681 | Patient108F  | Patient258E |
| 11681 | Patient181A  | Patient252D |
| 11681 | Patient192E  | Patient247B |
| 11681 | Patient192E  | Patient247C |
| 11681 | Patient192F  | Patient196D |
| 11681 | Patient195   | Patient218B |
| 11681 | Patient195   | Patient236B |
| 11681 | Patient195   | Patient246A |
| 11681 | Patient217D  | Patient252A |
| 11681 | Patient217I  | Patient252A |
| 11681 | Patient224B  | Patient252D |
| 11682 | Patient023   | Patient224A |
| 11682 | Patient079A1 | Patient217B |
| 11682 | Patient079A1 | Patient217E |
| 11682 | Patient079A1 | Patient217F |
| 11682 | Patient079A1 | Patient217H |
| 11682 | Patient079A2 | Patient092B |
| 11682 | Patient079A2 | Patient217C |
| 11682 | Patient092A  | Patient097B |
| 11682 | Patient092A  | Patient109E |
| 11682 | Patient092B  | Patient236B |
| 11682 | Patient092E  | Patient097B |
| 11682 | Patient092E  | Patient108G |
| 11682 | Patient092H  | Patient127B |
| 11682 | Patient149B  | Patient192F |
| 11682 | Patient173A  | Patient246E |
| 11682 | Patient181A  | Patient236B |
| 11682 | Patient217C  | Patient252B |
| 11683 | Patient074C  | Patient100A |
| 11683 | Patient079A1 | Patient217D |
| 11683 | Patient079A1 | Patient217I |
| 11683 | Patient079A2 | Patient217B |
| 11683 | Patient079A2 | Patient217E |
| 11683 | Patient079A2 | Patient217F |
| 11683 | Patient079A2 | Patient217H |
| 11683 | Patient092A  | Patient108G |
| 11683 | Patient092B  | Patient097D |

|       |              |              |
|-------|--------------|--------------|
| 11683 | Patient092B  | Patient218B  |
| 11683 | Patient092E  | Patient099B  |
| 11683 | Patient092E  | Patient108H  |
| 11683 | Patient092H  | Patient108D  |
| 11683 | Patient104A  | Patient181B  |
| 11683 | Patient104A  | Patient224B  |
| 11683 | Patient181B  | Patient252D  |
| 11683 | Patient187   | Patient195   |
| 11683 | Patient192E  | Patient246E  |
| 11683 | Patient192F  | Patient201A  |
| 11683 | Patient217B  | Patient252B  |
| 11683 | Patient217F  | Patient252B  |
| 11683 | Patient217H  | Patient252B  |
| 11684 | Patient021A2 | Patient173A  |
| 11684 | Patient026C  | Patient079A1 |
| 11684 | Patient074B  | Patient100A  |
| 11684 | Patient074C  | Patient126D  |
| 11684 | Patient074C  | Patient131   |
| 11684 | Patient079A2 | Patient217D  |
| 11684 | Patient079A2 | Patient217I  |
| 11684 | Patient092A  | Patient099B  |
| 11684 | Patient092A  | Patient252F  |
| 11684 | Patient092B  | Patient108A  |
| 11684 | Patient092B  | Patient252B  |
| 11684 | Patient092E  | Patient099A  |
| 11684 | Patient092H  | Patient201E  |
| 11684 | Patient097A  | Patient103A  |
| 11684 | Patient103E  | Patient247A  |
| 11684 | Patient108D  | Patient258E  |
| 11684 | Patient192E  | Patient246D  |
| 11684 | Patient192F  | Patient246A  |
| 11684 | Patient192F  | Patient263B  |
| 11684 | Patient217D  | Patient252B  |
| 11684 | Patient217E  | Patient252B  |
| 11684 | Patient217I  | Patient252B  |
| 11685 | Patient021A2 | Patient103E  |
| 11685 | Patient023   | Patient103B  |
| 11685 | Patient026C  | Patient079A2 |
| 11685 | Patient074A  | Patient100A  |
| 11685 | Patient074A  | Patient131   |
| 11685 | Patient074B  | Patient126D  |
| 11685 | Patient074B  | Patient131   |
| 11685 | Patient074D  | Patient100A  |
| 11685 | Patient079B  | Patient092A  |
| 11685 | Patient079B  | Patient092E  |
| 11685 | Patient092A  | Patient097C  |
| 11685 | Patient092A  | Patient099A  |
| 11685 | Patient092A  | Patient108H  |
| 11685 | Patient092B  | Patient187   |
| 11685 | Patient092E  | Patient097C  |



|       |              |             |
|-------|--------------|-------------|
| 11685 | Patient092E  | Patient109D |
| 11685 | Patient092E  | Patient222F |
| 11685 | Patient092E  | Patient252F |
| 11685 | Patient097E  | Patient103A |
| 11685 | Patient103A  | Patient104B |
| 11685 | Patient104A  | Patient181A |
| 11685 | Patient217A  | Patient252F |
| 11686 | Patient021A1 | Patient173A |
| 11686 | Patient021A2 | Patient120A |
| 11686 | Patient074A  | Patient126D |
| 11686 | Patient074D  | Patient126D |
| 11686 | Patient074D  | Patient131  |
| 11686 | Patient092A  | Patient109D |
| 11686 | Patient092A  | Patient222F |
| 11686 | Patient092B  | Patient109C |
| 11686 | Patient092B  | Patient222B |
| 11686 | Patient092E  | Patient099C |
| 11686 | Patient092E  | Patient236A |
| 11686 | Patient092H  | Patient247E |
| 11686 | Patient092H  | Patient263B |
| 11686 | Patient103D  | Patient247E |
| 11686 | Patient103E  | Patient247B |
| 11686 | Patient103E  | Patient247C |
| 11686 | Patient126A  | Patient213B |
| 11686 | Patient173A  | Patient184  |
| 11686 | Patient184   | Patient192F |
| 11686 | Patient192F  | Patient246C |
| 11687 | Patient021A1 | Patient103E |
| 11687 | Patient021A2 | Patient195  |
| 11687 | Patient023   | Patient103C |
| 11687 | Patient074C  | Patient247D |
| 11687 | Patient092A  | Patient099C |
| 11687 | Patient092A  | Patient222A |
| 11687 | Patient092A  | Patient236A |
| 11687 | Patient092B  | Patient097B |
| 11687 | Patient092E  | Patient196C |
| 11687 | Patient092E  | Patient222A |
| 11687 | Patient092H  | Patient149B |
| 11687 | Patient103A  | Patient252D |
| 11687 | Patient103D  | Patient159  |
| 11687 | Patient181B  | Patient220A |
| 11687 | Patient217C  | Patient252F |
| 11687 | Patient220A  | Patient224B |
| 11687 | Patient235C  | Patient252A |
| 11688 | Patient021A1 | Patient120A |
| 11688 | Patient074B  | Patient247D |
| 11688 | Patient074E  | Patient100A |
| 11688 | Patient074E  | Patient126D |
| 11688 | Patient074E  | Patient131  |
| 11688 | Patient079C  | Patient217J |

|       |              |             |
|-------|--------------|-------------|
| 11688 | Patient092A  | Patient189E |
| 11688 | Patient092A  | Patient196C |
| 11688 | Patient092B  | Patient108G |
| 11688 | Patient092B  | Patient109E |
| 11688 | Patient092E  | Patient109A |
| 11688 | Patient092E  | Patient189E |
| 11688 | Patient092E  | Patient196A |
| 11688 | Patient092E  | Patient265  |
| 11688 | Patient092H  | Patient196D |
| 11688 | Patient092H  | Patient201A |
| 11688 | Patient103A  | Patient236B |
| 11688 | Patient120A  | Patient184  |
| 11688 | Patient181B  | Patient196D |
| 11688 | Patient196D  | Patient224B |
| 11688 | Patient217B  | Patient252F |
| 11688 | Patient217E  | Patient252F |
| 11688 | Patient217F  | Patient252F |
| 11688 | Patient217H  | Patient252F |
| 11689 | Patient021A1 | Patient195  |
| 11689 | Patient074A  | Patient247D |
| 11689 | Patient074D  | Patient247D |
| 11689 | Patient079B  | Patient217A |
| 11689 | Patient092A  | Patient109A |
| 11689 | Patient092A  | Patient189A |
| 11689 | Patient092A  | Patient196A |
| 11689 | Patient092A  | Patient265  |
| 11689 | Patient092B  | Patient099B |
| 11689 | Patient092B  | Patient108H |
| 11689 | Patient092B  | Patient252F |
| 11689 | Patient092E  | Patient189A |
| 11689 | Patient092E  | Patient222E |
| 11689 | Patient103A  | Patient104A |
| 11689 | Patient181B  | Patient236A |
| 11689 | Patient192F  | Patient246B |
| 11689 | Patient195   | Patient222A |
| 11689 | Patient195   | Patient236A |
| 11689 | Patient217D  | Patient252F |
| 11689 | Patient217I  | Patient252F |
| 11689 | Patient217J  | Patient252A |
| 11689 | Patient224B  | Patient236A |
| 11689 | Patient235C  | Patient252B |
| 11690 | Patient079B  | Patient092B |
| 11690 | Patient079B  | Patient217C |
| 11690 | Patient092B  | Patient097C |
| 11690 | Patient092B  | Patient099A |
| 11690 | Patient092E  | Patient099D |
| 11690 | Patient092E  | Patient108F |
| 11690 | Patient092E  | Patient109B |
| 11690 | Patient092E  | Patient189B |
| 11690 | Patient092E  | Patient196B |

|       |              |             |
|-------|--------------|-------------|
| 11690 | Patient092E  | Patient196E |
| 11690 | Patient120B  | Patient131  |
| 11690 | Patient181A  | Patient220A |
| 11690 | Patient181B  | Patient196C |
| 11690 | Patient218A  | Patient224B |
| 11691 | Patient079A1 | Patient217J |
| 11691 | Patient079B  | Patient217B |
| 11691 | Patient079B  | Patient217E |
| 11691 | Patient079B  | Patient217F |
| 11691 | Patient079B  | Patient217H |
| 11691 | Patient092A  | Patient108F |
| 11691 | Patient092A  | Patient189B |
| 11691 | Patient092A  | Patient196B |
| 11691 | Patient092A  | Patient196E |
| 11691 | Patient092A  | Patient222E |
| 11691 | Patient092B  | Patient109D |
| 11691 | Patient092B  | Patient222F |
| 11691 | Patient092E  | Patient201B |
| 11691 | Patient092E  | Patient222D |
| 11691 | Patient099B  | Patient195  |
| 11691 | Patient099E  | Patient224B |
| 11691 | Patient181A  | Patient196D |
| 11691 | Patient181B  | Patient222F |
| 11692 | Patient079A2 | Patient217J |
| 11692 | Patient079B  | Patient217D |
| 11692 | Patient092A  | Patient099D |
| 11692 | Patient092A  | Patient109B |
| 11692 | Patient092A  | Patient201B |
| 11692 | Patient092A  | Patient222D |
| 11692 | Patient092B  | Patient099C |
| 11692 | Patient092B  | Patient222A |
| 11692 | Patient092B  | Patient236A |
| 11692 | Patient092E  | Patient127A |
| 11692 | Patient092H  | Patient184  |
| 11692 | Patient099E  | Patient181A |
| 11692 | Patient103E  | Patient247E |
| 11692 | Patient126A  | Patient189E |
| 11692 | Patient181A  | Patient236A |
| 11692 | Patient181B  | Patient196A |
| 11692 | Patient192F  | Patient247A |
| 11692 | Patient217J  | Patient252B |
| 11692 | Patient222F  | Patient224B |
| 11692 | Patient235C  | Patient252F |
| 11693 | Patient045D  | Patient181A |
| 11693 | Patient092A  | Patient127A |
| 11693 | Patient092B  | Patient189E |
| 11693 | Patient092B  | Patient196C |
| 11693 | Patient092E  | Patient127B |
| 11693 | Patient099A  | Patient195  |
| 11693 | Patient103E  | Patient159  |

|       |              |             |
|-------|--------------|-------------|
| 11693 | Patient104B  | Patient126A |
| 11693 | Patient126A  | Patient189A |
| 11693 | Patient181A  | Patient218A |
| 11693 | Patient181B  | Patient222A |
| 11693 | Patient181B  | Patient222E |
| 11693 | Patient195   | Patient196A |
| 11693 | Patient213B  | Patient224A |
| 11693 | Patient222B  | Patient224A |
| 11693 | Patient235B  | Patient252A |
| 11694 | Patient079B  | Patient217I |
| 11694 | Patient079C  | Patient192D |
| 11694 | Patient092A  | Patient127B |
| 11694 | Patient092B  | Patient189A |
| 11694 | Patient092B  | Patient196A |
| 11694 | Patient092B  | Patient265  |
| 11694 | Patient092E  | Patient108D |
| 11694 | Patient099C  | Patient195  |
| 11694 | Patient120C  | Patient131  |
| 11694 | Patient181A  | Patient222A |
| 11694 | Patient181A  | Patient222F |
| 11694 | Patient181B  | Patient196B |
| 11694 | Patient181B  | Patient196E |
| 11694 | Patient181B  | Patient218A |
| 11694 | Patient181B  | Patient218B |
| 11694 | Patient192F  | Patient247B |
| 11694 | Patient192F  | Patient247C |
| 11694 | Patient195   | Patient196C |
| 11694 | Patient195   | Patient201B |
| 11694 | Patient195   | Patient222E |
| 11694 | Patient195   | Patient222F |
| 11694 | Patient195   | Patient265  |
| 11694 | Patient196A  | Patient224B |
| 11694 | Patient196C  | Patient224B |
| 11694 | Patient222A  | Patient224B |
| 11695 | Patient026C  | Patient079B |
| 11695 | Patient074E  | Patient247D |
| 11695 | Patient079A1 | Patient192D |
| 11695 | Patient092B  | Patient109A |
| 11695 | Patient092B  | Patient189B |
| 11695 | Patient092E  | Patient201E |
| 11695 | Patient097C  | Patient103A |
| 11695 | Patient126A  | Patient189B |
| 11695 | Patient181A  | Patient196A |
| 11695 | Patient181A  | Patient196C |
| 11695 | Patient181A  | Patient222E |
| 11695 | Patient181B  | Patient187  |
| 11695 | Patient218B  | Patient224B |
| 11695 | Patient222E  | Patient224B |
| 11695 | Patient235B  | Patient252B |
| 11696 | Patient045D  | Patient181B |

|       |              |             |
|-------|--------------|-------------|
| 11696 | Patient079A2 | Patient192D |
| 11696 | Patient092A  | Patient108D |
| 11696 | Patient092A  | Patient201E |
| 11696 | Patient092B  | Patient108F |
| 11696 | Patient092B  | Patient109B |
| 11696 | Patient092B  | Patient196B |
| 11696 | Patient092B  | Patient196E |
| 11696 | Patient092B  | Patient222E |
| 11696 | Patient099E  | Patient181B |
| 11696 | Patient103A  | Patient196D |
| 11696 | Patient103A  | Patient220A |
| 11696 | Patient126A  | Patient252D |
| 11696 | Patient181A  | Patient218B |
| 11696 | Patient181B  | Patient265  |
| 11696 | Patient192F  | Patient246D |
| 11696 | Patient192F  | Patient246E |
| 11696 | Patient195   | Patient196B |
| 11696 | Patient195   | Patient222D |
| 11696 | Patient196B  | Patient224B |
| 11696 | Patient196E  | Patient224B |
| 11696 | Patient224B  | Patient265  |
| 11697 | Patient021A2 | Patient224B |
| 11697 | Patient092B  | Patient099D |
| 11697 | Patient092B  | Patient201B |
| 11697 | Patient092B  | Patient222D |
| 11697 | Patient092E  | Patient247E |
| 11697 | Patient092E  | Patient263B |
| 11697 | Patient097D  | Patient103A |
| 11697 | Patient099D  | Patient195  |
| 11697 | Patient103A  | Patient236A |
| 11697 | Patient104A  | Patient126A |
| 11697 | Patient104B  | Patient224A |
| 11697 | Patient108A  | Patient217A |
| 11697 | Patient108A  | Patient217C |
| 11697 | Patient126A  | Patient222B |
| 11697 | Patient126A  | Patient236B |
| 11697 | Patient181A  | Patient196B |
| 11697 | Patient181A  | Patient196E |
| 11697 | Patient195   | Patient196E |
| 11697 | Patient201B  | Patient224B |
| 11697 | Patient217J  | Patient252F |
| 11698 | Patient021A2 | Patient181B |
| 11698 | Patient092B  | Patient127A |
| 11698 | Patient092E  | Patient149B |
| 11698 | Patient099E  | Patient103A |
| 11698 | Patient103A  | Patient218A |
| 11698 | Patient108A  | Patient217B |
| 11698 | Patient108A  | Patient217E |
| 11698 | Patient108A  | Patient217F |
| 11698 | Patient108A  | Patient217H |

|       |              |             |
|-------|--------------|-------------|
| 11698 | Patient181A  | Patient187  |
| 11698 | Patient181A  | Patient265  |
| 11698 | Patient181B  | Patient201B |
| 11698 | Patient181B  | Patient222D |
| 11698 | Patient187   | Patient224B |
| 11698 | Patient235B  | Patient252F |
| 11699 | Patient021A1 | Patient224B |
| 11699 | Patient092A  | Patient247E |
| 11699 | Patient092A  | Patient263B |
| 11699 | Patient092B  | Patient127B |
| 11699 | Patient092E  | Patient196D |
| 11699 | Patient092E  | Patient201A |
| 11699 | Patient092H  | Patient247A |
| 11699 | Patient108A  | Patient217D |
| 11699 | Patient108A  | Patient217I |
| 11699 | Patient108G  | Patient217A |
| 11699 | Patient109C  | Patient217A |
| 11699 | Patient181A  | Patient201B |
| 11699 | Patient222D  | Patient224B |
| 11699 | Patient224A  | Patient236B |
| 11700 | Patient021A1 | Patient181B |
| 11700 | Patient021A2 | Patient181A |
| 11700 | Patient079B  | Patient217J |
| 11700 | Patient079C  | Patient103A |
| 11700 | Patient092A  | Patient149B |
| 11700 | Patient092A  | Patient196D |
| 11700 | Patient092B  | Patient108D |
| 11700 | Patient092E  | Patient246C |
| 11700 | Patient092H  | Patient247B |
| 11700 | Patient092H  | Patient247C |
| 11700 | Patient103A  | Patient196A |
| 11700 | Patient103A  | Patient196C |
| 11700 | Patient108G  | Patient217C |
| 11700 | Patient120B  | Patient246A |
| 11700 | Patient127B  | Patient195  |
| 11701 | Patient092A  | Patient201A |
| 11701 | Patient092A  | Patient246C |
| 11701 | Patient092E  | Patient246A |
| 11701 | Patient103A  | Patient196B |
| 11701 | Patient103A  | Patient222A |
| 11701 | Patient103A  | Patient222F |
| 11701 | Patient103C  | Patient222B |
| 11701 | Patient104A  | Patient224A |
| 11701 | Patient108G  | Patient217B |
| 11701 | Patient108G  | Patient217E |
| 11701 | Patient108G  | Patient217F |
| 11701 | Patient108G  | Patient217H |
| 11701 | Patient108H  | Patient217A |
| 11701 | Patient109C  | Patient217C |
| 11701 | Patient109E  | Patient217A |

|       |              |             |
|-------|--------------|-------------|
| 11701 | Patient126A  | Patient196D |
| 11701 | Patient181A  | Patient222D |
| 11701 | Patient224A  | Patient252D |
| 11702 | Patient021A1 | Patient181A |
| 11702 | Patient092A  | Patient246A |
| 11702 | Patient092B  | Patient201E |
| 11702 | Patient092H  | Patient246C |
| 11702 | Patient103A  | Patient196E |
| 11702 | Patient103A  | Patient218B |
| 11702 | Patient103A  | Patient222E |
| 11702 | Patient108G  | Patient217D |
| 11702 | Patient108G  | Patient217I |
| 11702 | Patient109C  | Patient217B |
| 11702 | Patient109C  | Patient217E |
| 11702 | Patient109C  | Patient217F |
| 11702 | Patient109C  | Patient217H |
| 11702 | Patient126A  | Patient220A |
| 11702 | Patient127A  | Patient195  |
| 11702 | Patient181B  | Patient201E |
| 11702 | Patient201E  | Patient224B |
| 11703 | Patient045D  | Patient224B |
| 11703 | Patient079A1 | Patient103A |
| 11703 | Patient079A2 | Patient103A |
| 11703 | Patient092B  | Patient263B |
| 11703 | Patient092E  | Patient184  |
| 11703 | Patient092H  | Patient246A |
| 11703 | Patient103A  | Patient187  |
| 11703 | Patient103A  | Patient265  |
| 11703 | Patient108H  | Patient217C |
| 11703 | Patient109C  | Patient217D |
| 11703 | Patient109E  | Patient217C |
| 11703 | Patient120C  | Patient246A |
| 11703 | Patient195   | Patient201E |
| 11704 | Patient092A  | Patient184  |
| 11704 | Patient092B  | Patient149B |
| 11704 | Patient092B  | Patient247E |
| 11704 | Patient099B  | Patient181B |
| 11704 | Patient103A  | Patient201B |
| 11704 | Patient103A  | Patient252A |
| 11704 | Patient103B  | Patient213B |
| 11704 | Patient108H  | Patient217B |
| 11704 | Patient108H  | Patient217E |
| 11704 | Patient108H  | Patient217F |
| 11704 | Patient108H  | Patient217H |
| 11704 | Patient109C  | Patient217I |
| 11704 | Patient109E  | Patient217B |
| 11704 | Patient109E  | Patient217E |
| 11704 | Patient109E  | Patient217F |
| 11704 | Patient109E  | Patient217H |
| 11704 | Patient149B  | Patient195  |

|       |             |             |
|-------|-------------|-------------|
| 11704 | Patient181A | Patient201E |
| 11705 | Patient081E | Patient097E |
| 11705 | Patient092B | Patient196D |
| 11705 | Patient092B | Patient201A |
| 11705 | Patient092E | Patient246B |
| 11705 | Patient099A | Patient181B |
| 11705 | Patient099B | Patient224B |
| 11705 | Patient099C | Patient181B |
| 11705 | Patient103A | Patient108A |
| 11705 | Patient103C | Patient213B |
| 11705 | Patient108H | Patient217D |
| 11705 | Patient108H | Patient217I |
| 11705 | Patient109D | Patient217A |
| 11705 | Patient109E | Patient217D |
| 11705 | Patient109E | Patient217I |
| 11705 | Patient120D | Patient247A |
| 11705 | Patient149B | Patient181B |
| 11705 | Patient149B | Patient224B |
| 11705 | Patient181B | Patient201A |
| 11705 | Patient195  | Patient201A |
| 11705 | Patient201A | Patient224B |
| 11706 | Patient081E | Patient097A |
| 11706 | Patient092A | Patient246B |
| 11706 | Patient099A | Patient224B |
| 11706 | Patient099C | Patient224B |
| 11706 | Patient103A | Patient252B |
| 11706 | Patient103B | Patient104B |
| 11706 | Patient103B | Patient222B |
| 11706 | Patient109A | Patient217A |
| 11706 | Patient109B | Patient217A |
| 11706 | Patient120D | Patient247C |
| 11706 | Patient126A | Patient236A |
| 11706 | Patient195  | Patient263B |
| 11706 | Patient220A | Patient224A |
| 11707 | Patient079B | Patient192D |
| 11707 | Patient081F | Patient097A |
| 11707 | Patient092H | Patient246B |
| 11707 | Patient097B | Patient103A |
| 11707 | Patient099B | Patient181A |
| 11707 | Patient103C | Patient104B |
| 11707 | Patient108A | Patient217J |
| 11707 | Patient109D | Patient217C |
| 11707 | Patient120D | Patient247B |
| 11707 | Patient126A | Patient196C |
| 11707 | Patient149B | Patient181A |
| 11707 | Patient181A | Patient201A |
| 11707 | Patient181B | Patient246C |
| 11707 | Patient181B | Patient263B |
| 11707 | Patient184  | Patient195  |
| 11707 | Patient196D | Patient224A |



|       |              |             |
|-------|--------------|-------------|
| 11707 | Patient224B  | Patient263B |
| 11708 | Patient081F  | Patient097E |
| 11708 | Patient099A  | Patient181A |
| 11708 | Patient099C  | Patient181A |
| 11708 | Patient099E  | Patient126A |
| 11708 | Patient103A  | Patient222D |
| 11708 | Patient108B1 | Patient224A |
| 11708 | Patient108B2 | Patient224A |
| 11708 | Patient108F  | Patient217A |
| 11708 | Patient109A  | Patient217C |
| 11708 | Patient109B  | Patient217C |
| 11708 | Patient109D  | Patient217B |
| 11708 | Patient109D  | Patient217E |
| 11708 | Patient109D  | Patient217F |
| 11708 | Patient109D  | Patient217H |
| 11708 | Patient120D  | Patient246A |
| 11708 | Patient126A  | Patient196A |
| 11708 | Patient126A  | Patient222F |
| 11708 | Patient224A  | Patient236A |
| 11708 | Patient224B  | Patient246C |
| 11709 | Patient081B  | Patient097A |
| 11709 | Patient092E  | Patient247A |
| 11709 | Patient099D  | Patient181B |
| 11709 | Patient103A  | Patient201E |
| 11709 | Patient103C  | Patient252D |
| 11709 | Patient109A  | Patient217B |
| 11709 | Patient109A  | Patient217E |
| 11709 | Patient109A  | Patient217F |
| 11709 | Patient109A  | Patient217H |
| 11709 | Patient109B  | Patient217B |
| 11709 | Patient109B  | Patient217E |
| 11709 | Patient109B  | Patient217F |
| 11709 | Patient109B  | Patient217H |
| 11709 | Patient109D  | Patient217D |
| 11709 | Patient109D  | Patient217I |
| 11709 | Patient120B  | Patient247A |
| 11709 | Patient126A  | Patient196B |
| 11709 | Patient126A  | Patient196E |
| 11709 | Patient126A  | Patient222A |
| 11709 | Patient126A  | Patient222E |
| 11710 | Patient023   | Patient120D |
| 11710 | Patient081B  | Patient097E |
| 11710 | Patient092A  | Patient247A |
| 11710 | Patient092B  | Patient184  |
| 11710 | Patient099D  | Patient224B |
| 11710 | Patient103A  | Patient108G |
| 11710 | Patient103A  | Patient109C |
| 11710 | Patient103B  | Patient104A |
| 11710 | Patient103B  | Patient236B |
| 11710 | Patient108D  | Patient217A |

|       |              |             |
|-------|--------------|-------------|
| 11710 | Patient108F  | Patient217C |
| 11710 | Patient108G  | Patient217J |
| 11710 | Patient109A  | Patient217D |
| 11710 | Patient109A  | Patient217I |
| 11710 | Patient109B  | Patient217D |
| 11710 | Patient109B  | Patient217I |
| 11710 | Patient120B  | Patient247C |
| 11710 | Patient126A  | Patient218A |
| 11710 | Patient126A  | Patient218B |
| 11710 | Patient126A  | Patient265  |
| 11710 | Patient181A  | Patient246C |
| 11710 | Patient181A  | Patient263B |
| 11710 | Patient181B  | Patient246B |
| 11710 | Patient218A  | Patient224A |
| 11711 | Patient081A2 | Patient097A |
| 11711 | Patient092E  | Patient246D |
| 11711 | Patient092E  | Patient247B |
| 11711 | Patient103A  | Patient252F |
| 11711 | Patient103C  | Patient104A |
| 11711 | Patient103C  | Patient236B |
| 11711 | Patient108F  | Patient217B |
| 11711 | Patient108F  | Patient217E |
| 11711 | Patient108F  | Patient217F |
| 11711 | Patient108F  | Patient217H |
| 11711 | Patient109C  | Patient217J |
| 11711 | Patient120B  | Patient247B |
| 11711 | Patient127A  | Patient181B |
| 11711 | Patient127A  | Patient224B |
| 11711 | Patient222F  | Patient224A |
| 11711 | Patient224B  | Patient246B |
| 11712 | Patient081A2 | Patient097E |
| 11712 | Patient092A  | Patient246D |
| 11712 | Patient092A  | Patient247B |
| 11712 | Patient092A  | Patient247C |
| 11712 | Patient092E  | Patient246E |
| 11712 | Patient092E  | Patient247C |
| 11712 | Patient092H  | Patient246D |
| 11712 | Patient099B  | Patient103A |
| 11712 | Patient099D  | Patient181A |
| 11712 | Patient103A  | Patient108H |
| 11712 | Patient103A  | Patient109E |
| 11712 | Patient103A  | Patient201A |
| 11712 | Patient103B  | Patient252D |
| 11712 | Patient108D  | Patient217C |
| 11712 | Patient108F  | Patient217D |
| 11712 | Patient108F  | Patient217I |
| 11712 | Patient120C  | Patient247A |
| 11712 | Patient127B  | Patient224B |
| 11712 | Patient222A  | Patient224A |
| 11713 | Patient079B  | Patient103A |

|       |              |              |
|-------|--------------|--------------|
| 11713 | Patient081E  | Patient097D  |
| 11713 | Patient081F  | Patient097D  |
| 11713 | Patient092A  | Patient246E  |
| 11713 | Patient099A  | Patient103A  |
| 11713 | Patient099C  | Patient103A  |
| 11713 | Patient103A  | Patient149B  |
| 11713 | Patient108D  | Patient217B  |
| 11713 | Patient108D  | Patient217E  |
| 11713 | Patient108D  | Patient217F  |
| 11713 | Patient108D  | Patient217H  |
| 11713 | Patient108H  | Patient217J  |
| 11713 | Patient109E  | Patient217J  |
| 11713 | Patient120C  | Patient247C  |
| 11713 | Patient127B  | Patient181B  |
| 11713 | Patient181A  | Patient246B  |
| 11713 | Patient196A  | Patient224A  |
| 11713 | Patient196C  | Patient224A  |
| 11713 | Patient222E  | Patient224A  |
| 11714 | Patient081B  | Patient097D  |
| 11714 | Patient081E  | Patient097B  |
| 11714 | Patient092H  | Patient246E  |
| 11714 | Patient097E  | Patient126C  |
| 11714 | Patient099E  | Patient224A  |
| 11714 | Patient108D  | Patient217D  |
| 11714 | Patient108D  | Patient217I  |
| 11714 | Patient120C  | Patient247B  |
| 11714 | Patient126A  | Patient187   |
| 11714 | Patient126A  | Patient222D  |
| 11714 | Patient127A  | Patient181A  |
| 11714 | Patient218B  | Patient224A  |
| 11714 | Patient224A  | Patient265   |
| 11715 | Patient021A2 | Patient126A  |
| 11715 | Patient081E  | Patient097C  |
| 11715 | Patient081E  | Patient252A  |
| 11715 | Patient092B  | Patient247A  |
| 11715 | Patient103A  | Patient246C  |
| 11715 | Patient103A  | Patient263B  |
| 11715 | Patient120D  | Patient159   |
| 11715 | Patient196B  | Patient224A  |
| 11715 | Patient196E  | Patient224A  |
| 11716 | Patient021A1 | Patient126A  |
| 11716 | Patient081A1 | Patient097A  |
| 11716 | Patient081F  | Patient252A  |
| 11716 | Patient097A  | Patient126C  |
| 11716 | Patient103A  | Patient109D  |
| 11716 | Patient103B  | Patient108B1 |
| 11716 | Patient103B  | Patient108B2 |
| 11716 | Patient126A  | Patient201B  |
| 11716 | Patient126A  | Patient201E  |
| 11716 | Patient127B  | Patient181A  |

|       |              |              |
|-------|--------------|--------------|
| 11716 | Patient201B  | Patient224A  |
| 11717 | Patient081A1 | Patient097E  |
| 11717 | Patient081A2 | Patient097D  |
| 11717 | Patient081F  | Patient097B  |
| 11717 | Patient092B  | Patient247B  |
| 11717 | Patient092B  | Patient247C  |
| 11717 | Patient099D  | Patient103A  |
| 11717 | Patient103A  | Patient109A  |
| 11717 | Patient103B  | Patient196D  |
| 11717 | Patient103B  | Patient220A  |
| 11717 | Patient103C  | Patient108B1 |
| 11717 | Patient103C  | Patient108B2 |
| 11717 | Patient109D  | Patient217J  |
| 11717 | Patient120D  | Patient247E  |
| 11717 | Patient187   | Patient224A  |
| 11718 | Patient081E  | Patient252B  |
| 11718 | Patient081F  | Patient097C  |
| 11718 | Patient099B  | Patient126A  |
| 11718 | Patient103A  | Patient108F  |
| 11718 | Patient103A  | Patient109B  |
| 11718 | Patient103C  | Patient196D  |
| 11718 | Patient103C  | Patient220A  |
| 11718 | Patient109A  | Patient217J  |
| 11718 | Patient109B  | Patient217J  |
| 11718 | Patient126A  | Patient149B  |
| 11718 | Patient181B  | Patient184   |
| 11718 | Patient181B  | Patient246E  |
| 11718 | Patient222D  | Patient224A  |
| 11718 | Patient224B  | Patient246D  |
| 11718 | Patient224B  | Patient246E  |
| 11719 | Patient081B  | Patient097B  |
| 11719 | Patient081B  | Patient252A  |
| 11719 | Patient081F  | Patient252B  |
| 11719 | Patient092B  | Patient246C  |
| 11719 | Patient099A  | Patient126A  |
| 11719 | Patient099C  | Patient126A  |
| 11719 | Patient103A  | Patient246B  |
| 11719 | Patient103B  | Patient236A  |
| 11719 | Patient126A  | Patient246C  |
| 11719 | Patient181B  | Patient246D  |
| 11720 | Patient081B  | Patient097C  |
| 11720 | Patient092B  | Patient246A  |
| 11720 | Patient097D  | Patient126C  |
| 11720 | Patient103A  | Patient127A  |
| 11720 | Patient103C  | Patient196C  |
| 11720 | Patient103C  | Patient236A  |
| 11720 | Patient108F  | Patient217J  |
| 11720 | Patient120B  | Patient247E  |
| 11720 | Patient126A  | Patient201A  |
| 11720 | Patient181A  | Patient184   |

|       |              |             |
|-------|--------------|-------------|
| 11720 | Patient181A  | Patient246D |
| 11720 | Patient201E  | Patient224A |
| 11721 | Patient081A2 | Patient097B |
| 11721 | Patient097A  | Patient230A |
| 11721 | Patient103A  | Patient127B |
| 11721 | Patient103B  | Patient196A |
| 11721 | Patient103B  | Patient196C |
| 11721 | Patient103B  | Patient222F |
| 11721 | Patient103C  | Patient218A |
| 11721 | Patient126A  | Patient263B |
| 11721 | Patient181A  | Patient246E |
| 11722 | Patient023   | Patient120B |
| 11722 | Patient045D  | Patient126A |
| 11722 | Patient081A1 | Patient097D |
| 11722 | Patient081A2 | Patient097C |
| 11722 | Patient081A2 | Patient252A |
| 11722 | Patient081E  | Patient252F |
| 11722 | Patient097E  | Patient230A |
| 11722 | Patient099E  | Patient103C |
| 11722 | Patient103A  | Patient108D |
| 11722 | Patient103B  | Patient196B |
| 11722 | Patient103B  | Patient222E |
| 11722 | Patient103C  | Patient196A |
| 11722 | Patient103D  | Patient189E |
| 11722 | Patient108D  | Patient217J |
| 11722 | Patient184   | Patient224B |
| 11722 | Patient195   | Patient246C |
| 11723 | Patient081B  | Patient252B |
| 11723 | Patient081F  | Patient252F |
| 11723 | Patient099D  | Patient126A |
| 11723 | Patient103B  | Patient196E |
| 11723 | Patient103B  | Patient222A |
| 11723 | Patient103C  | Patient196B |
| 11723 | Patient103C  | Patient222A |
| 11723 | Patient103C  | Patient222F |
| 11723 | Patient103D  | Patient189A |
| 11723 | Patient103D  | Patient189B |
| 11723 | Patient120C  | Patient247E |
| 11724 | Patient092B  | Patient246B |
| 11724 | Patient097B  | Patient126C |
| 11724 | Patient103B  | Patient218A |
| 11724 | Patient103B  | Patient218B |
| 11724 | Patient103B  | Patient265  |
| 11724 | Patient103C  | Patient187  |
| 11724 | Patient103C  | Patient196E |
| 11724 | Patient149B  | Patient224A |
| 11724 | Patient201A  | Patient224A |
| 11725 | Patient023   | Patient120C |
| 11725 | Patient081A2 | Patient252B |
| 11725 | Patient099B  | Patient224A |

|       |              |             |
|-------|--------------|-------------|
| 11725 | Patient103A  | Patient246D |
| 11725 | Patient103B  | Patient187  |
| 11725 | Patient103C  | Patient218B |
| 11725 | Patient103C  | Patient222E |
| 11725 | Patient103C  | Patient265  |
| 11725 | Patient126A  | Patient127A |
| 11726 | Patient081A1 | Patient097B |
| 11726 | Patient097D  | Patient230A |
| 11726 | Patient099A  | Patient224A |
| 11726 | Patient099C  | Patient224A |
| 11726 | Patient103A  | Patient246E |
| 11726 | Patient103B  | Patient201B |
| 11726 | Patient126A  | Patient127B |
| 11726 | Patient126A  | Patient246B |
| 11726 | Patient195   | Patient246B |
| 11726 | Patient224A  | Patient246C |
| 11727 | Patient081A1 | Patient097C |
| 11727 | Patient081A1 | Patient252A |
| 11727 | Patient081B  | Patient252F |
| 11727 | Patient097C  | Patient126C |
| 11727 | Patient099E  | Patient103B |
| 11727 | Patient103C  | Patient201B |
| 11727 | Patient224A  | Patient263B |
| 11728 | Patient097E  | Patient230E |
| 11728 | Patient103C  | Patient222D |
| 11728 | Patient103E  | Patient189E |
| 11729 | Patient081A2 | Patient252F |
| 11729 | Patient097A  | Patient230E |
| 11729 | Patient103E  | Patient189A |
| 11729 | Patient103E  | Patient189B |
| 11730 | Patient026A  | Patient097E |
| 11730 | Patient081A1 | Patient252B |
| 11730 | Patient092B  | Patient246D |
| 11730 | Patient103A  | Patient184  |
| 11730 | Patient103B  | Patient201E |
| 11730 | Patient103B  | Patient222D |
| 11730 | Patient120B  | Patient159  |
| 11730 | Patient126A  | Patient246D |
| 11730 | Patient127A  | Patient224A |
| 11730 | Patient224A  | Patient246B |
| 11731 | Patient026A  | Patient097A |
| 11731 | Patient092B  | Patient246E |
| 11731 | Patient097A  | Patient230F |
| 11731 | Patient097B  | Patient230A |
| 11731 | Patient097D  | Patient230E |
| 11731 | Patient099D  | Patient224A |
| 11731 | Patient103C  | Patient201E |
| 11731 | Patient127B  | Patient224A |
| 11731 | Patient195   | Patient246D |
| 11732 | Patient097E  | Patient230F |

|       |              |             |
|-------|--------------|-------------|
| 11732 | Patient103D  | Patient222B |
| 11732 | Patient120C  | Patient159  |
| 11732 | Patient126A  | Patient246E |
| 11733 | Patient097C  | Patient230A |
| 11733 | Patient103B  | Patient201A |
| 11733 | Patient103D  | Patient213B |
| 11734 | Patient026A  | Patient097D |
| 11734 | Patient081A1 | Patient252F |
| 11734 | Patient097A  | Patient230B |
| 11734 | Patient097B  | Patient230E |
| 11734 | Patient103B  | Patient149B |
| 11734 | Patient103C  | Patient201A |
| 11735 | Patient097E  | Patient230B |
| 11735 | Patient099B  | Patient103B |
| 11735 | Patient103C  | Patient149B |
| 11735 | Patient195   | Patient246E |
| 11736 | Patient097A  | Patient103D |
| 11736 | Patient097A  | Patient141C |
| 11736 | Patient097D  | Patient230F |
| 11736 | Patient099A  | Patient103B |
| 11736 | Patient099B  | Patient103C |
| 11736 | Patient099C  | Patient103B |
| 11736 | Patient103B  | Patient246C |
| 11736 | Patient103B  | Patient263B |
| 11736 | Patient103D  | Patient104B |
| 11736 | Patient103E  | Patient213B |
| 11737 | Patient097A  | Patient141B |
| 11737 | Patient097C  | Patient230E |
| 11737 | Patient097E  | Patient103D |
| 11737 | Patient097E  | Patient141A |
| 11737 | Patient097E  | Patient141C |
| 11737 | Patient099A  | Patient103C |
| 11737 | Patient099C  | Patient103C |
| 11737 | Patient103C  | Patient246C |
| 11737 | Patient103C  | Patient263B |
| 11737 | Patient103D  | Patient252D |
| 11737 | Patient224A  | Patient246D |
| 11737 | Patient224A  | Patient246E |
| 11738 | Patient097A  | Patient141A |
| 11738 | Patient097E  | Patient141B |
| 11738 | Patient103D  | Patient236B |
| 11738 | Patient103E  | Patient222B |
| 11738 | Patient108A  | Patient235C |
| 11739 | Patient026A  | Patient097B |
| 11739 | Patient097D  | Patient230B |
| 11739 | Patient126A  | Patient184  |
| 11740 | Patient097D  | Patient141C |
| 11740 | Patient099D  | Patient103B |
| 11740 | Patient103B  | Patient246B |
| 11740 | Patient103D  | Patient104A |

|       |              |             |
|-------|--------------|-------------|
| 11740 | Patient173B  | Patient252A |
| 11741 | Patient026A  | Patient097C |
| 11741 | Patient097B  | Patient230F |
| 11741 | Patient097C  | Patient230F |
| 11741 | Patient099D  | Patient103C |
| 11741 | Patient103B  | Patient127A |
| 11741 | Patient103C  | Patient246B |
| 11741 | Patient184   | Patient224A |
| 11742 | Patient074C  | Patient246A |
| 11742 | Patient097A  | Patient103E |
| 11742 | Patient097D  | Patient141B |
| 11742 | Patient103B  | Patient127B |
| 11742 | Patient103C  | Patient127A |
| 11742 | Patient103E  | Patient104B |
| 11742 | Patient109C  | Patient235C |
| 11742 | Patient173B  | Patient252B |
| 11743 | Patient074A  | Patient246A |
| 11743 | Patient074B  | Patient246A |
| 11743 | Patient097D  | Patient141A |
| 11743 | Patient097E  | Patient103E |
| 11743 | Patient103C  | Patient127B |
| 11743 | Patient103E  | Patient252D |
| 11743 | Patient108A  | Patient235B |
| 11743 | Patient108G  | Patient235C |
| 11743 | Patient141C  | Patient252A |
| 11743 | Patient230A  | Patient252A |
| 11744 | Patient021A2 | Patient103B |
| 11744 | Patient026F  | Patient097E |
| 11744 | Patient074D  | Patient246A |
| 11744 | Patient097B  | Patient230B |
| 11744 | Patient103E  | Patient236B |
| 11744 | Patient141A  | Patient252A |
| 11745 | Patient097B  | Patient141A |
| 11745 | Patient097B  | Patient141C |
| 11745 | Patient097C  | Patient230B |
| 11745 | Patient108H  | Patient235C |
| 11745 | Patient109D  | Patient235C |
| 11745 | Patient141B  | Patient252A |
| 11745 | Patient230A  | Patient252B |
| 11745 | Patient230E  | Patient252A |
| 11746 | Patient021A1 | Patient103B |
| 11746 | Patient021A2 | Patient103C |
| 11746 | Patient097B  | Patient141B |
| 11746 | Patient097C  | Patient141A |
| 11746 | Patient097C  | Patient141C |
| 11746 | Patient103D  | Patient196D |
| 11746 | Patient103E  | Patient104A |
| 11746 | Patient109E  | Patient235C |
| 11746 | Patient141A  | Patient252B |
| 11746 | Patient141C  | Patient252B |



|       |              |             |
|-------|--------------|-------------|
| 11747 | Patient026B  | Patient097A |
| 11747 | Patient026B  | Patient097E |
| 11747 | Patient026F  | Patient097A |
| 11747 | Patient074E  | Patient246A |
| 11747 | Patient097C  | Patient103D |
| 11747 | Patient097C  | Patient141B |
| 11747 | Patient103B  | Patient246D |
| 11747 | Patient103B  | Patient246E |
| 11747 | Patient103C  | Patient246D |
| 11747 | Patient103D  | Patient236A |
| 11747 | Patient109C  | Patient235B |
| 11747 | Patient141B  | Patient252B |
| 11747 | Patient173B  | Patient252F |
| 11747 | Patient230E  | Patient252B |
| 11748 | Patient021A1 | Patient103C |
| 11748 | Patient103C  | Patient246E |
| 11748 | Patient103D  | Patient220A |
| 11748 | Patient108G  | Patient235B |
| 11749 | Patient021A2 | Patient224A |
| 11749 | Patient097D  | Patient103D |
| 11749 | Patient109E  | Patient235B |
| 11750 | Patient026F  | Patient097D |
| 11750 | Patient074C  | Patient247A |
| 11750 | Patient103D  | Patient196A |
| 11750 | Patient103D  | Patient196C |
| 11750 | Patient108H  | Patient235B |
| 11750 | Patient109A  | Patient235C |
| 11750 | Patient109D  | Patient235B |
| 11750 | Patient141A  | Patient252F |
| 11750 | Patient230A  | Patient252F |
| 11751 | Patient021A1 | Patient224A |
| 11751 | Patient026B  | Patient097D |
| 11751 | Patient074B  | Patient247A |
| 11751 | Patient074D  | Patient247A |
| 11751 | Patient103D  | Patient196B |
| 11751 | Patient103D  | Patient218A |
| 11751 | Patient109B  | Patient235C |
| 11751 | Patient141C  | Patient252F |
| 11752 | Patient074A  | Patient247A |
| 11752 | Patient074C  | Patient247B |
| 11752 | Patient074C  | Patient247C |
| 11752 | Patient079C  | Patient103D |
| 11752 | Patient099E  | Patient103D |
| 11752 | Patient103B  | Patient184  |
| 11752 | Patient103D  | Patient196E |
| 11752 | Patient103E  | Patient196D |
| 11752 | Patient141B  | Patient252F |
| 11752 | Patient230E  | Patient252F |
| 11752 | Patient230F  | Patient252A |
| 11753 | Patient026F  | Patient097B |

|       |              |             |
|-------|--------------|-------------|
| 11753 | Patient045D  | Patient120D |
| 11753 | Patient074B  | Patient247B |
| 11753 | Patient074B  | Patient247C |
| 11753 | Patient074D  | Patient247B |
| 11753 | Patient097C  | Patient103E |
| 11753 | Patient103C  | Patient184  |
| 11753 | Patient103D  | Patient222A |
| 11753 | Patient103D  | Patient222F |
| 11753 | Patient103E  | Patient236A |
| 11753 | Patient108F  | Patient235C |
| 11754 | Patient074A  | Patient247B |
| 11754 | Patient074A  | Patient247C |
| 11754 | Patient074D  | Patient247C |
| 11754 | Patient103D  | Patient222E |
| 11754 | Patient103D  | Patient252A |
| 11754 | Patient103E  | Patient220A |
| 11754 | Patient108A  | Patient141C |
| 11754 | Patient108D  | Patient235C |
| 11754 | Patient230F  | Patient252B |
| 11755 | Patient026F  | Patient097C |
| 11755 | Patient074E  | Patient247A |
| 11755 | Patient079A1 | Patient103D |
| 11755 | Patient079A2 | Patient103D |
| 11755 | Patient097D  | Patient103E |
| 11755 | Patient103D  | Patient187  |
| 11755 | Patient103D  | Patient218B |
| 11755 | Patient103D  | Patient265  |
| 11755 | Patient109A  | Patient235B |
| 11755 | Patient230B  | Patient252A |
| 11756 | Patient026B  | Patient097B |
| 11756 | Patient074C  | Patient159  |
| 11756 | Patient103D  | Patient201B |
| 11756 | Patient103D  | Patient252B |
| 11756 | Patient103E  | Patient196A |
| 11756 | Patient103E  | Patient196C |
| 11756 | Patient109B  | Patient235B |
| 11757 | Patient066D  | Patient097A |
| 11757 | Patient066F  | Patient097A |
| 11757 | Patient074A  | Patient159  |
| 11757 | Patient074B  | Patient159  |
| 11757 | Patient074E  | Patient247B |
| 11757 | Patient074E  | Patient247C |
| 11757 | Patient097A  | Patient173A |
| 11757 | Patient097E  | Patient173A |
| 11757 | Patient103D  | Patient108A |
| 11757 | Patient103E  | Patient196B |
| 11757 | Patient103E  | Patient218A |
| 11757 | Patient108A  | Patient141A |
| 11757 | Patient108A  | Patient141B |
| 11757 | Patient230B  | Patient252B |

|       |              |             |
|-------|--------------|-------------|
| 11758 | Patient026B  | Patient097C |
| 11758 | Patient066D  | Patient097E |
| 11758 | Patient066E  | Patient097A |
| 11758 | Patient066F  | Patient097E |
| 11758 | Patient074C  | Patient247E |
| 11758 | Patient079C  | Patient103E |
| 11758 | Patient099E  | Patient103E |
| 11758 | Patient103E  | Patient196E |
| 11758 | Patient108F  | Patient235B |
| 11759 | Patient045D  | Patient103C |
| 11759 | Patient045D  | Patient224A |
| 11759 | Patient066E  | Patient097E |
| 11759 | Patient074B  | Patient247E |
| 11759 | Patient097B  | Patient103D |
| 11759 | Patient103E  | Patient222A |
| 11759 | Patient103E  | Patient222F |
| 11759 | Patient108D  | Patient235B |
| 11759 | Patient109C  | Patient141C |
| 11759 | Patient120D  | Patient213B |
| 11760 | Patient074A  | Patient247E |
| 11760 | Patient074D  | Patient247E |
| 11760 | Patient081E  | Patient108A |
| 11760 | Patient081F  | Patient108A |
| 11760 | Patient103D  | Patient222D |
| 11760 | Patient103E  | Patient222E |
| 11760 | Patient103E  | Patient252A |
| 11760 | Patient108G  | Patient141C |
| 11760 | Patient109C  | Patient141A |
| 11760 | Patient230F  | Patient252F |
| 11761 | Patient079A1 | Patient103E |
| 11761 | Patient079A2 | Patient103E |
| 11761 | Patient081B  | Patient108A |
| 11761 | Patient103D  | Patient201E |
| 11761 | Patient103D  | Patient252F |
| 11761 | Patient103E  | Patient187  |
| 11761 | Patient103E  | Patient218B |
| 11761 | Patient103E  | Patient265  |
| 11761 | Patient108G  | Patient141A |
| 11761 | Patient108H  | Patient141C |
| 11761 | Patient109C  | Patient141B |
| 11762 | Patient045D  | Patient120B |
| 11762 | Patient066D  | Patient097D |
| 11762 | Patient066F  | Patient097D |
| 11762 | Patient081E  | Patient109C |
| 11762 | Patient103D  | Patient108G |
| 11762 | Patient103D  | Patient109C |
| 11762 | Patient103E  | Patient201B |
| 11762 | Patient103E  | Patient252B |
| 11762 | Patient108G  | Patient141B |
| 11762 | Patient108H  | Patient141A |

|       |              |             |
|-------|--------------|-------------|
| 11762 | Patient230B  | Patient252F |
| 11763 | Patient066E  | Patient097D |
| 11763 | Patient074E  | Patient159  |
| 11763 | Patient081E  | Patient108G |
| 11763 | Patient103E  | Patient108A |
| 11763 | Patient104B  | Patient120D |
| 11763 | Patient109E  | Patient141C |
| 11764 | Patient026A  | Patient252A |
| 11764 | Patient045D  | Patient103B |
| 11764 | Patient045D  | Patient120A |
| 11764 | Patient074D  | Patient159  |
| 11764 | Patient079C  | Patient081E |
| 11764 | Patient081A2 | Patient108A |
| 11764 | Patient103D  | Patient108H |
| 11764 | Patient103D  | Patient109E |
| 11764 | Patient103D  | Patient201A |
| 11764 | Patient108H  | Patient141B |
| 11764 | Patient109E  | Patient141A |
| 11764 | Patient109E  | Patient141B |
| 11765 | Patient066D  | Patient097B |
| 11765 | Patient066F  | Patient097B |
| 11765 | Patient074E  | Patient247E |
| 11765 | Patient079A1 | Patient081E |
| 11765 | Patient079C  | Patient081F |
| 11765 | Patient081E  | Patient108H |
| 11765 | Patient081E  | Patient109E |
| 11765 | Patient081F  | Patient108G |
| 11765 | Patient081F  | Patient109C |
| 11765 | Patient097B  | Patient103E |
| 11765 | Patient103D  | Patient149B |
| 11765 | Patient108B1 | Patient120D |
| 11765 | Patient108B2 | Patient120D |
| 11765 | Patient109D  | Patient141C |
| 11766 | Patient026A  | Patient252B |
| 11766 | Patient045D  | Patient120C |
| 11766 | Patient066E  | Patient097B |
| 11766 | Patient079A2 | Patient081E |
| 11766 | Patient079B  | Patient103D |
| 11766 | Patient081B  | Patient109C |
| 11766 | Patient099B  | Patient103D |
| 11766 | Patient103D  | Patient263B |
| 11766 | Patient103E  | Patient222D |
| 11766 | Patient109D  | Patient141A |
| 11767 | Patient079C  | Patient081B |
| 11767 | Patient081B  | Patient108G |
| 11767 | Patient099A  | Patient103D |
| 11767 | Patient099C  | Patient103D |
| 11767 | Patient103D  | Patient109D |
| 11767 | Patient103E  | Patient201E |
| 11767 | Patient103E  | Patient252F |

|       |              |              |
|-------|--------------|--------------|
| 11767 | Patient104A  | Patient120D  |
| 11767 | Patient120D  | Patient252D  |
| 11768 | Patient026F  | Patient252A  |
| 11768 | Patient066D  | Patient097C  |
| 11768 | Patient066F  | Patient097C  |
| 11768 | Patient079A1 | Patient081F  |
| 11768 | Patient081F  | Patient108H  |
| 11768 | Patient081F  | Patient109E  |
| 11768 | Patient103E  | Patient108G  |
| 11768 | Patient103E  | Patient109C  |
| 11768 | Patient108F  | Patient141A  |
| 11768 | Patient108F  | Patient141C  |
| 11768 | Patient109A  | Patient141A  |
| 11768 | Patient109A  | Patient141C  |
| 11768 | Patient109D  | Patient141B  |
| 11768 | Patient120D  | Patient236B  |
| 11769 | Patient066E  | Patient097C  |
| 11769 | Patient079A2 | Patient081F  |
| 11769 | Patient081A1 | Patient108A  |
| 11769 | Patient081A2 | Patient108G  |
| 11769 | Patient081A2 | Patient109C  |
| 11769 | Patient081B  | Patient108H  |
| 11769 | Patient081E  | Patient109A  |
| 11769 | Patient081E  | Patient109B  |
| 11769 | Patient081E  | Patient109D  |
| 11769 | Patient097C  | Patient173A  |
| 11769 | Patient103D  | Patient109A  |
| 11769 | Patient103D  | Patient109B  |
| 11769 | Patient103D  | Patient246C  |
| 11769 | Patient109B  | Patient141C  |
| 11770 | Patient045D  | Patient173A  |
| 11770 | Patient062   | Patient135   |
| 11770 | Patient079A1 | Patient081B  |
| 11770 | Patient079C  | Patient081A2 |
| 11770 | Patient081B  | Patient109E  |
| 11770 | Patient081E  | Patient108F  |
| 11770 | Patient097D  | Patient173A  |
| 11770 | Patient103D  | Patient108F  |
| 11770 | Patient103E  | Patient108H  |
| 11770 | Patient103E  | Patient109E  |
| 11770 | Patient103E  | Patient201A  |
| 11770 | Patient108A  | Patient173B  |
| 11770 | Patient108A  | Patient230A  |
| 11770 | Patient108F  | Patient141B  |
| 11770 | Patient109A  | Patient141B  |
| 11770 | Patient109B  | Patient141A  |
| 11771 | Patient026F  | Patient252B  |
| 11771 | Patient079A2 | Patient081B  |
| 11771 | Patient079C  | Patient235C  |
| 11771 | Patient099D  | Patient103D  |

|       |              |              |
|-------|--------------|--------------|
| 11771 | Patient103D  | Patient246B  |
| 11771 | Patient103E  | Patient149B  |
| 11771 | Patient109B  | Patient141B  |
| 11771 | Patient126C  | Patient252A  |
| 11772 | Patient023   | Patient074C  |
| 11772 | Patient026A  | Patient252F  |
| 11772 | Patient079B  | Patient103E  |
| 11772 | Patient081A2 | Patient108H  |
| 11772 | Patient081A2 | Patient109E  |
| 11772 | Patient081F  | Patient109A  |
| 11772 | Patient081F  | Patient109B  |
| 11772 | Patient081F  | Patient109D  |
| 11772 | Patient099B  | Patient103E  |
| 11772 | Patient103E  | Patient263B  |
| 11772 | Patient108D  | Patient141A  |
| 11772 | Patient108D  | Patient141C  |
| 11772 | Patient120B  | Patient236B  |
| 11773 | Patient023   | Patient074A  |
| 11773 | Patient023   | Patient074B  |
| 11773 | Patient026A  | Patient108A  |
| 11773 | Patient026B  | Patient252A  |
| 11773 | Patient079A1 | Patient081A2 |
| 11773 | Patient079C  | Patient141C  |
| 11773 | Patient081B  | Patient109A  |
| 11773 | Patient081B  | Patient109D  |
| 11773 | Patient081F  | Patient108F  |
| 11773 | Patient099A  | Patient103E  |
| 11773 | Patient099C  | Patient103E  |
| 11773 | Patient103D  | Patient127A  |
| 11773 | Patient103E  | Patient109D  |
| 11773 | Patient108A  | Patient230E  |
| 11773 | Patient120B  | Patient213B  |
| 11774 | Patient023   | Patient074D  |
| 11774 | Patient079A1 | Patient235C  |
| 11774 | Patient079A2 | Patient081A2 |
| 11774 | Patient079A2 | Patient235C  |
| 11774 | Patient079C  | Patient081A1 |
| 11774 | Patient079C  | Patient141A  |
| 11774 | Patient079C  | Patient230A  |
| 11774 | Patient081A1 | Patient108G  |
| 11774 | Patient081A1 | Patient109C  |
| 11774 | Patient081B  | Patient109B  |
| 11774 | Patient103D  | Patient108D  |
| 11774 | Patient103D  | Patient127B  |
| 11774 | Patient104B  | Patient120B  |
| 11774 | Patient108D  | Patient141B  |
| 11774 | Patient109C  | Patient230A  |
| 11774 | Patient120D  | Patient220A  |
| 11774 | Patient126C  | Patient252B  |
| 11775 | Patient026B  | Patient252B  |

|       |              |              |
|-------|--------------|--------------|
| 11775 | Patient079C  | Patient141B  |
| 11775 | Patient081B  | Patient108F  |
| 11775 | Patient081E  | Patient108D  |
| 11775 | Patient103E  | Patient109A  |
| 11775 | Patient103E  | Patient246C  |
| 11775 | Patient108G  | Patient230A  |
| 11775 | Patient109C  | Patient173B  |
| 11776 | Patient023   | Patient074E  |
| 11776 | Patient026F  | Patient252F  |
| 11776 | Patient079A1 | Patient141A  |
| 11776 | Patient079A1 | Patient141C  |
| 11776 | Patient079C  | Patient230E  |
| 11776 | Patient079C  | Patient235B  |
| 11776 | Patient081A2 | Patient109A  |
| 11776 | Patient081A2 | Patient109B  |
| 11776 | Patient081A2 | Patient109D  |
| 11776 | Patient103E  | Patient108F  |
| 11776 | Patient103E  | Patient109B  |
| 11776 | Patient108G  | Patient173B  |
| 11776 | Patient120C  | Patient236B  |
| 11776 | Patient120D  | Patient222B  |
| 11777 | Patient026A  | Patient108G  |
| 11777 | Patient026A  | Patient109C  |
| 11777 | Patient079A1 | Patient081A1 |
| 11777 | Patient079A1 | Patient230A  |
| 11777 | Patient079A2 | Patient141A  |
| 11777 | Patient079A2 | Patient141C  |
| 11777 | Patient079B  | Patient081E  |
| 11777 | Patient081A1 | Patient108H  |
| 11777 | Patient081A1 | Patient109E  |
| 11777 | Patient081A2 | Patient108F  |
| 11777 | Patient099D  | Patient103E  |
| 11777 | Patient099E  | Patient120D  |
| 11777 | Patient103E  | Patient246B  |
| 11777 | Patient108G  | Patient230E  |
| 11777 | Patient108H  | Patient230A  |
| 11777 | Patient109E  | Patient230A  |
| 11777 | Patient120C  | Patient213B  |
| 11778 | Patient074C  | Patient104B  |
| 11778 | Patient079A1 | Patient141B  |
| 11778 | Patient079A1 | Patient230E  |
| 11778 | Patient079A2 | Patient081A1 |
| 11778 | Patient079A2 | Patient230A  |
| 11778 | Patient081F  | Patient108D  |
| 11778 | Patient103D  | Patient246D  |
| 11778 | Patient103D  | Patient246E  |
| 11778 | Patient104A  | Patient120B  |
| 11778 | Patient104B  | Patient120C  |
| 11778 | Patient108A  | Patient230F  |
| 11778 | Patient108H  | Patient173B  |

|       |              |             |
|-------|--------------|-------------|
| 11778 | Patient108H  | Patient230E |
| 11778 | Patient109E  | Patient173B |
| 11778 | Patient120B  | Patient252D |
| 11779 | Patient026A  | Patient108H |
| 11779 | Patient026A  | Patient109E |
| 11779 | Patient074B  | Patient104B |
| 11779 | Patient074C  | Patient104A |
| 11779 | Patient079A2 | Patient141B |
| 11779 | Patient079A2 | Patient230E |
| 11779 | Patient103E  | Patient127A |
| 11779 | Patient120B  | Patient222B |
| 11779 | Patient120D  | Patient196D |
| 11779 | Patient120D  | Patient236A |
| 11779 | Patient126C  | Patient252F |
| 11780 | Patient026B  | Patient252F |
| 11780 | Patient026F  | Patient108A |
| 11780 | Patient074A  | Patient104B |
| 11780 | Patient074B  | Patient104A |
| 11780 | Patient074D  | Patient104B |
| 11780 | Patient079A1 | Patient235B |
| 11780 | Patient079A2 | Patient235B |
| 11780 | Patient079B  | Patient081F |
| 11780 | Patient079B  | Patient235C |
| 11780 | Patient081B  | Patient108D |
| 11780 | Patient097B  | Patient173A |
| 11780 | Patient103E  | Patient108D |
| 11780 | Patient103E  | Patient127B |
| 11780 | Patient108B1 | Patient120B |
| 11780 | Patient108B2 | Patient120B |
| 11781 | Patient026B  | Patient108A |
| 11781 | Patient026F  | Patient109C |
| 11781 | Patient074A  | Patient104A |
| 11781 | Patient074D  | Patient104A |
| 11781 | Patient081A1 | Patient109A |
| 11781 | Patient081A1 | Patient109B |
| 11781 | Patient081A1 | Patient109D |
| 11781 | Patient109D  | Patient230A |
| 11781 | Patient120C  | Patient222B |
| 11781 | Patient120D  | Patient222A |
| 11781 | Patient120D  | Patient222F |
| 11782 | Patient079B  | Patient081B |
| 11782 | Patient081A1 | Patient108F |
| 11782 | Patient081A2 | Patient108D |
| 11782 | Patient104A  | Patient120C |
| 11782 | Patient108A  | Patient230B |
| 11782 | Patient109D  | Patient173B |
| 11782 | Patient120C  | Patient252D |
| 11782 | Patient120D  | Patient196C |
| 11782 | Patient120D  | Patient218A |
| 11782 | Patient120D  | Patient265  |



|       |              |              |
|-------|--------------|--------------|
| 11783 | Patient026A  | Patient109D  |
| 11783 | Patient026F  | Patient108G  |
| 11783 | Patient026F  | Patient108H  |
| 11783 | Patient079C  | Patient230F  |
| 11783 | Patient103D  | Patient184   |
| 11783 | Patient108F  | Patient230A  |
| 11783 | Patient108G  | Patient230F  |
| 11783 | Patient109A  | Patient173B  |
| 11783 | Patient109A  | Patient230A  |
| 11783 | Patient120B  | Patient236A  |
| 11783 | Patient120D  | Patient196A  |
| 11783 | Patient120D  | Patient222E  |
| 11784 | Patient026A  | Patient109A  |
| 11784 | Patient026F  | Patient109E  |
| 11784 | Patient074E  | Patient104B  |
| 11784 | Patient079B  | Patient081A2 |
| 11784 | Patient103E  | Patient246E  |
| 11784 | Patient108B1 | Patient120C  |
| 11784 | Patient108B2 | Patient120C  |
| 11784 | Patient108F  | Patient173B  |
| 11784 | Patient108F  | Patient230E  |
| 11784 | Patient109B  | Patient173B  |
| 11784 | Patient109B  | Patient230A  |
| 11784 | Patient109C  | Patient230F  |
| 11784 | Patient120B  | Patient196C  |
| 11784 | Patient120B  | Patient196D  |
| 11784 | Patient120B  | Patient222F  |
| 11784 | Patient120D  | Patient218B  |
| 11785 | Patient026A  | Patient109B  |
| 11785 | Patient026B  | Patient108G  |
| 11785 | Patient074E  | Patient104A  |
| 11785 | Patient079A1 | Patient230F  |
| 11785 | Patient079B  | Patient141A  |
| 11785 | Patient079B  | Patient141C  |
| 11785 | Patient079C  | Patient230B  |
| 11785 | Patient103E  | Patient246D  |
| 11785 | Patient108H  | Patient230F  |
| 11785 | Patient109A  | Patient230E  |
| 11785 | Patient109B  | Patient230E  |
| 11785 | Patient120D  | Patient196B  |
| 11785 | Patient120D  | Patient196E  |
| 11786 | Patient026B  | Patient109C  |
| 11786 | Patient079A2 | Patient230F  |
| 11786 | Patient079B  | Patient230A  |
| 11786 | Patient079B  | Patient235B  |
| 11786 | Patient109C  | Patient230B  |
| 11786 | Patient109E  | Patient230F  |
| 11786 | Patient120B  | Patient222A  |
| 11786 | Patient120B  | Patient265   |
| 11786 | Patient120D  | Patient187   |

|       |              |              |
|-------|--------------|--------------|
| 11787 | Patient026B  | Patient108H  |
| 11787 | Patient026F  | Patient109D  |
| 11787 | Patient079B  | Patient141B  |
| 11787 | Patient079B  | Patient230E  |
| 11787 | Patient081A1 | Patient108D  |
| 11787 | Patient108D  | Patient230A  |
| 11787 | Patient108G  | Patient230B  |
| 11787 | Patient109C  | Patient230E  |
| 11787 | Patient120B  | Patient196A  |
| 11787 | Patient120B  | Patient220A  |
| 11787 | Patient120B  | Patient222E  |
| 11787 | Patient120C  | Patient236A  |
| 11788 | Patient026A  | Patient108F  |
| 11788 | Patient026B  | Patient109E  |
| 11788 | Patient026F  | Patient109A  |
| 11788 | Patient079A1 | Patient230B  |
| 11788 | Patient108D  | Patient173B  |
| 11788 | Patient108D  | Patient230E  |
| 11788 | Patient120C  | Patient196D  |
| 11788 | Patient120C  | Patient222F  |
| 11788 | Patient120D  | Patient201B  |
| 11789 | Patient026A  | Patient108D  |
| 11789 | Patient074C  | Patient189E  |
| 11789 | Patient079A2 | Patient230B  |
| 11789 | Patient079B  | Patient081A1 |
| 11789 | Patient103E  | Patient184   |
| 11789 | Patient108H  | Patient230B  |
| 11789 | Patient109D  | Patient230F  |
| 11789 | Patient109E  | Patient230B  |
| 11789 | Patient120B  | Patient196B  |
| 11789 | Patient120B  | Patient196E  |
| 11789 | Patient120C  | Patient222A  |
| 11790 | Patient026F  | Patient109B  |
| 11790 | Patient074B  | Patient189E  |
| 11790 | Patient074C  | Patient189A  |
| 11790 | Patient099B  | Patient120D  |
| 11790 | Patient099E  | Patient120B  |
| 11790 | Patient109E  | Patient230E  |
| 11790 | Patient120C  | Patient196C  |
| 11790 | Patient120C  | Patient265   |
| 11790 | Patient120D  | Patient201E  |
| 11790 | Patient120D  | Patient222D  |
| 11791 | Patient026B  | Patient109D  |
| 11791 | Patient066D  | Patient252A  |
| 11791 | Patient066F  | Patient252A  |
| 11791 | Patient074A  | Patient189E  |
| 11791 | Patient074B  | Patient189A  |
| 11791 | Patient074C  | Patient189B  |
| 11791 | Patient074D  | Patient189E  |
| 11791 | Patient099A  | Patient120D  |

|       |             |              |
|-------|-------------|--------------|
| 11791 | Patient109A | Patient230F  |
| 11791 | Patient120B | Patient201B  |
| 11791 | Patient120C | Patient196A  |
| 11791 | Patient120C | Patient220A  |
| 11791 | Patient120C | Patient222E  |
| 11791 | Patient120D | Patient149B  |
| 11792 | Patient026F | Patient079C  |
| 11792 | Patient026F | Patient108F  |
| 11792 | Patient066E | Patient252A  |
| 11792 | Patient074A | Patient189A  |
| 11792 | Patient074B | Patient189B  |
| 11792 | Patient074D | Patient189A  |
| 11792 | Patient099C | Patient120D  |
| 11792 | Patient099E | Patient120C  |
| 11792 | Patient108F | Patient230F  |
| 11792 | Patient109B | Patient230F  |
| 11793 | Patient026B | Patient079C  |
| 11793 | Patient026B | Patient109A  |
| 11793 | Patient026B | Patient109B  |
| 11793 | Patient026F | Patient079A1 |
| 11793 | Patient066D | Patient252B  |
| 11793 | Patient066F | Patient252B  |
| 11793 | Patient074A | Patient189B  |
| 11793 | Patient074D | Patient189B  |
| 11793 | Patient097E | Patient181B  |
| 11793 | Patient109D | Patient230B  |
| 11793 | Patient109D | Patient230E  |
| 11793 | Patient120C | Patient196B  |
| 11793 | Patient120C | Patient196E  |
| 11793 | Patient120D | Patient263B  |
| 11794 | Patient026F | Patient079A2 |
| 11794 | Patient026F | Patient108D  |
| 11794 | Patient066E | Patient252B  |
| 11794 | Patient079B | Patient230F  |
| 11794 | Patient079C | Patient173B  |
| 11794 | Patient097A | Patient181A  |
| 11794 | Patient120B | Patient201E  |
| 11794 | Patient120B | Patient218A  |
| 11795 | Patient026B | Patient108F  |
| 11795 | Patient074E | Patient189E  |
| 11795 | Patient097A | Patient181B  |
| 11795 | Patient097E | Patient181A  |
| 11795 | Patient108D | Patient230F  |
| 11795 | Patient108F | Patient230B  |
| 11795 | Patient109A | Patient230B  |
| 11795 | Patient120B | Patient149B  |
| 11795 | Patient120C | Patient201B  |
| 11795 | Patient120D | Patient201A  |
| 11796 | Patient026B | Patient079A1 |
| 11796 | Patient074E | Patient189A  |

|       |              |              |
|-------|--------------|--------------|
| 11796 | Patient079A1 | Patient173B  |
| 11796 | Patient097E  | Patient126A  |
| 11796 | Patient099D  | Patient120D  |
| 11796 | Patient109B  | Patient230B  |
| 11796 | Patient120B  | Patient187   |
| 11796 | Patient120C  | Patient218A  |
| 11796 | Patient120D  | Patient189A  |
| 11796 | Patient120D  | Patient189E  |
| 11797 | Patient026B  | Patient079A2 |
| 11797 | Patient026B  | Patient108D  |
| 11797 | Patient074E  | Patient189B  |
| 11797 | Patient079A2 | Patient173B  |
| 11797 | Patient079B  | Patient230B  |
| 11797 | Patient120B  | Patient218B  |
| 11797 | Patient120B  | Patient246C  |
| 11797 | Patient120D  | Patient189B  |
| 11798 | Patient066D  | Patient252F  |
| 11798 | Patient066F  | Patient252F  |
| 11798 | Patient097A  | Patient126A  |
| 11798 | Patient120C  | Patient201E  |
| 11799 | Patient026A  | Patient079C  |
| 11799 | Patient074C  | Patient222B  |
| 11799 | Patient108D  | Patient230B  |
| 11799 | Patient120B  | Patient201A  |
| 11799 | Patient120B  | Patient263B  |
| 11799 | Patient120C  | Patient149B  |
| 11799 | Patient120D  | Patient127A  |
| 11800 | Patient066E  | Patient252F  |
| 11800 | Patient074B  | Patient222B  |
| 11800 | Patient120D  | Patient127B  |
| 11801 | Patient074A  | Patient222B  |
| 11801 | Patient120B  | Patient246B  |
| 11801 | Patient120C  | Patient218B  |
| 11801 | Patient120C  | Patient246C  |
| 11802 | Patient021A2 | Patient120D  |
| 11802 | Patient026A  | Patient079A1 |
| 11802 | Patient026F  | Patient079B  |
| 11802 | Patient074D  | Patient222B  |
| 11802 | Patient120B  | Patient222D  |
| 11802 | Patient120C  | Patient187   |
| 11803 | Patient026A  | Patient079A2 |
| 11803 | Patient074B  | Patient213B  |
| 11803 | Patient074C  | Patient213B  |
| 11803 | Patient097C  | Patient181B  |
| 11803 | Patient099A  | Patient120B  |
| 11803 | Patient099B  | Patient120B  |
| 11803 | Patient120C  | Patient201A  |
| 11803 | Patient120C  | Patient263B  |
| 11804 | Patient021A1 | Patient120D  |
| 11804 | Patient074D  | Patient213B  |

|       |             |              |
|-------|-------------|--------------|
| 11805 | Patient074A | Patient213B  |
| 11805 | Patient097C | Patient181A  |
| 11805 | Patient099C | Patient120B  |
| 11805 | Patient120C | Patient246B  |
| 11805 | Patient120D | Patient246C  |
| 11806 | Patient026B | Patient079B  |
| 11807 | Patient074C | Patient252D  |
| 11807 | Patient074E | Patient213B  |
| 11807 | Patient074E | Patient222B  |
| 11807 | Patient079B | Patient173B  |
| 11807 | Patient099A | Patient120C  |
| 11807 | Patient099B | Patient120C  |
| 11807 | Patient120B | Patient189A  |
| 11807 | Patient120B | Patient189E  |
| 11807 | Patient120B | Patient246D  |
| 11808 | Patient074B | Patient252D  |
| 11808 | Patient074C | Patient108B1 |
| 11808 | Patient074C | Patient108B2 |
| 11808 | Patient097D | Patient181A  |
| 11808 | Patient120C | Patient222D  |
| 11809 | Patient074A | Patient252D  |
| 11809 | Patient074B | Patient108B1 |
| 11809 | Patient074B | Patient108B2 |
| 11809 | Patient074C | Patient236B  |
| 11809 | Patient097C | Patient126A  |
| 11809 | Patient097D | Patient181B  |
| 11809 | Patient099C | Patient120C  |
| 11809 | Patient120B | Patient189B  |
| 11809 | Patient120B | Patient246E  |
| 11809 | Patient120D | Patient184   |
| 11809 | Patient120D | Patient246B  |
| 11810 | Patient074A | Patient108B1 |
| 11810 | Patient074A | Patient108B2 |
| 11810 | Patient074B | Patient236B  |
| 11810 | Patient074D | Patient108B1 |
| 11810 | Patient074D | Patient108B2 |
| 11810 | Patient074D | Patient252D  |
| 11810 | Patient099D | Patient120B  |
| 11811 | Patient066D | Patient079C  |
| 11811 | Patient066F | Patient079C  |
| 11811 | Patient074A | Patient236B  |
| 11811 | Patient074D | Patient236B  |
| 11811 | Patient120B | Patient127A  |
| 11811 | Patient120C | Patient246D  |
| 11812 | Patient026A | Patient079B  |
| 11812 | Patient074E | Patient108B1 |
| 11812 | Patient074E | Patient108B2 |
| 11812 | Patient097D | Patient126A  |
| 11812 | Patient120C | Patient189A  |
| 11812 | Patient120C | Patient189E  |

|       |              |              |
|-------|--------------|--------------|
| 11813 | Patient066E  | Patient079C  |
| 11813 | Patient120B  | Patient127B  |
| 11813 | Patient120C  | Patient189B  |
| 11813 | Patient120C  | Patient246E  |
| 11814 | Patient066D  | Patient079A1 |
| 11814 | Patient066F  | Patient079A1 |
| 11814 | Patient074E  | Patient252D  |
| 11814 | Patient097B  | Patient181B  |
| 11814 | Patient099D  | Patient120C  |
| 11815 | Patient021A2 | Patient120B  |
| 11815 | Patient066D  | Patient079A2 |
| 11815 | Patient066E  | Patient079A1 |
| 11815 | Patient066F  | Patient079A2 |
| 11815 | Patient074E  | Patient236B  |
| 11815 | Patient120C  | Patient127A  |
| 11816 | Patient066E  | Patient079A2 |
| 11816 | Patient074C  | Patient196D  |
| 11816 | Patient074C  | Patient220A  |
| 11816 | Patient097B  | Patient181A  |
| 11816 | Patient108A  | Patient126C  |
| 11816 | Patient120D  | Patient246D  |
| 11817 | Patient021A1 | Patient120B  |
| 11817 | Patient074B  | Patient196D  |
| 11817 | Patient074B  | Patient220A  |
| 11817 | Patient120C  | Patient127B  |
| 11817 | Patient120D  | Patient246E  |
| 11818 | Patient074A  | Patient196D  |
| 11818 | Patient074A  | Patient220A  |
| 11818 | Patient074C  | Patient099E  |
| 11818 | Patient074C  | Patient236A  |
| 11818 | Patient074D  | Patient196D  |
| 11818 | Patient074D  | Patient220A  |
| 11818 | Patient109C  | Patient126C  |
| 11819 | Patient021A2 | Patient120C  |
| 11819 | Patient066D  | Patient108A  |
| 11819 | Patient074B  | Patient099E  |
| 11819 | Patient074B  | Patient218A  |
| 11819 | Patient074B  | Patient236A  |
| 11819 | Patient074C  | Patient218A  |
| 11819 | Patient097A  | Patient103C  |
| 11819 | Patient097B  | Patient126A  |
| 11820 | Patient066E  | Patient108A  |
| 11820 | Patient074A  | Patient099E  |
| 11820 | Patient074A  | Patient236A  |
| 11820 | Patient074C  | Patient196A  |
| 11820 | Patient074C  | Patient196C  |
| 11820 | Patient074D  | Patient236A  |
| 11820 | Patient097E  | Patient103B  |
| 11820 | Patient097E  | Patient103C  |
| 11820 | Patient108G  | Patient126C  |

|       |              |             |
|-------|--------------|-------------|
| 11820 | Patient109E  | Patient126C |
| 11821 | Patient021A1 | Patient120C |
| 11821 | Patient074A  | Patient218A |
| 11821 | Patient074B  | Patient196A |
| 11821 | Patient074B  | Patient196C |
| 11821 | Patient074C  | Patient222F |
| 11821 | Patient074D  | Patient099E |
| 11821 | Patient074E  | Patient196D |
| 11821 | Patient074E  | Patient220A |
| 11821 | Patient108H  | Patient126C |
| 11822 | Patient066F  | Patient108A |
| 11822 | Patient074A  | Patient196A |
| 11822 | Patient074A  | Patient196C |
| 11822 | Patient074B  | Patient222F |
| 11822 | Patient074C  | Patient196B |
| 11822 | Patient074C  | Patient196E |
| 11822 | Patient074C  | Patient222A |
| 11822 | Patient074C  | Patient222E |
| 11822 | Patient074D  | Patient196A |
| 11822 | Patient074D  | Patient196C |
| 11822 | Patient074D  | Patient218A |
| 11822 | Patient097A  | Patient103B |
| 11822 | Patient120B  | Patient184  |
| 11823 | Patient074A  | Patient222F |
| 11823 | Patient074B  | Patient196B |
| 11823 | Patient074B  | Patient196E |
| 11823 | Patient074B  | Patient218B |
| 11823 | Patient074B  | Patient222A |
| 11823 | Patient074B  | Patient222E |
| 11823 | Patient074C  | Patient218B |
| 11823 | Patient074D  | Patient222F |
| 11823 | Patient074E  | Patient236A |
| 11824 | Patient066D  | Patient079B |
| 11824 | Patient066D  | Patient108G |
| 11824 | Patient066D  | Patient109C |
| 11824 | Patient066F  | Patient079B |
| 11824 | Patient066F  | Patient108G |
| 11824 | Patient066F  | Patient109C |
| 11824 | Patient074A  | Patient196B |
| 11824 | Patient074A  | Patient196E |
| 11824 | Patient074A  | Patient222A |
| 11824 | Patient074A  | Patient222E |
| 11824 | Patient074C  | Patient201B |
| 11824 | Patient074C  | Patient265  |
| 11824 | Patient074D  | Patient196B |
| 11824 | Patient074D  | Patient196E |
| 11824 | Patient074D  | Patient222A |
| 11824 | Patient074D  | Patient222E |
| 11824 | Patient097A  | Patient120A |
| 11824 | Patient097E  | Patient120A |

|       |             |             |
|-------|-------------|-------------|
| 11824 | Patient109D | Patient126C |
| 11825 | Patient066E | Patient079B |
| 11825 | Patient066E | Patient108G |
| 11825 | Patient074A | Patient218B |
| 11825 | Patient074B | Patient201B |
| 11825 | Patient074B | Patient265  |
| 11825 | Patient074C | Patient187  |
| 11825 | Patient074D | Patient218B |
| 11825 | Patient074E | Patient196A |
| 11825 | Patient074E | Patient196C |
| 11825 | Patient074E | Patient218A |
| 11826 | Patient066D | Patient108H |
| 11826 | Patient066D | Patient109E |
| 11826 | Patient066E | Patient109C |
| 11826 | Patient066F | Patient108H |
| 11826 | Patient066F | Patient109E |
| 11826 | Patient074A | Patient201B |
| 11826 | Patient074A | Patient265  |
| 11826 | Patient074B | Patient187  |
| 11826 | Patient074D | Patient265  |
| 11826 | Patient074E | Patient099E |
| 11826 | Patient120C | Patient184  |
| 11827 | Patient066E | Patient108H |
| 11827 | Patient074A | Patient187  |
| 11827 | Patient074C | Patient222D |
| 11827 | Patient074E | Patient196B |
| 11827 | Patient074E | Patient196E |
| 11827 | Patient074E | Patient222A |
| 11827 | Patient074E | Patient222E |
| 11827 | Patient074E | Patient222F |
| 11827 | Patient109A | Patient126C |
| 11827 | Patient109B | Patient126C |
| 11827 | Patient120A | Patient252A |
| 11828 | Patient066E | Patient109E |
| 11828 | Patient074B | Patient222D |
| 11828 | Patient074D | Patient187  |
| 11828 | Patient074E | Patient218B |
| 11829 | Patient074A | Patient222D |
| 11829 | Patient074C | Patient201E |
| 11829 | Patient074D | Patient201B |
| 11829 | Patient074E | Patient265  |
| 11829 | Patient108F | Patient126C |
| 11830 | Patient066D | Patient109D |
| 11830 | Patient066F | Patient109D |
| 11830 | Patient074B | Patient201E |
| 11830 | Patient074D | Patient222D |
| 11830 | Patient097C | Patient103B |
| 11830 | Patient097C | Patient103C |
| 11830 | Patient120A | Patient252B |
| 11831 | Patient066D | Patient109A |



|       |             |             |
|-------|-------------|-------------|
| 11831 | Patient066E | Patient109D |
| 11831 | Patient066F | Patient109A |
| 11831 | Patient074A | Patient201E |
| 11831 | Patient074D | Patient201E |
| 11831 | Patient074E | Patient201B |
| 11831 | Patient108D | Patient126C |
| 11832 | Patient066D | Patient108F |
| 11832 | Patient066D | Patient109B |
| 11832 | Patient066E | Patient109A |
| 11832 | Patient066F | Patient108F |
| 11832 | Patient066F | Patient109B |
| 11832 | Patient074C | Patient099B |
| 11832 | Patient074C | Patient201A |
| 11832 | Patient074D | Patient099B |
| 11832 | Patient074E | Patient187  |
| 11832 | Patient097D | Patient103C |
| 11833 | Patient066E | Patient109B |
| 11833 | Patient074B | Patient099B |
| 11833 | Patient074B | Patient201A |
| 11833 | Patient074C | Patient099A |
| 11833 | Patient074C | Patient099C |
| 11833 | Patient074C | Patient149B |
| 11833 | Patient074E | Patient222D |
| 11834 | Patient066E | Patient108F |
| 11834 | Patient074A | Patient099B |
| 11834 | Patient074A | Patient201A |
| 11834 | Patient074B | Patient099A |
| 11834 | Patient074B | Patient099C |
| 11834 | Patient074B | Patient149B |
| 11834 | Patient074D | Patient201A |
| 11834 | Patient074E | Patient201E |
| 11834 | Patient120A | Patient252F |
| 11835 | Patient074A | Patient099A |
| 11835 | Patient074A | Patient099C |
| 11835 | Patient074A | Patient149B |
| 11835 | Patient074D | Patient099A |
| 11835 | Patient074D | Patient099C |
| 11835 | Patient074D | Patient149B |
| 11836 | Patient066D | Patient108D |
| 11836 | Patient066F | Patient108D |
| 11836 | Patient074C | Patient263B |
| 11836 | Patient097C | Patient120A |
| 11836 | Patient097D | Patient103B |
| 11837 | Patient066E | Patient108D |
| 11837 | Patient074B | Patient263B |
| 11837 | Patient074C | Patient099D |
| 11837 | Patient074E | Patient099B |
| 11837 | Patient074E | Patient201A |
| 11838 | Patient074A | Patient263B |
| 11838 | Patient074B | Patient099D |

|       |              |             |
|-------|--------------|-------------|
| 11838 | Patient074D  | Patient263B |
| 11838 | Patient074E  | Patient099C |
| 11838 | Patient074E  | Patient149B |
| 11838 | Patient079C  | Patient126C |
| 11839 | Patient074A  | Patient099D |
| 11839 | Patient074C  | Patient246C |
| 11839 | Patient074D  | Patient099D |
| 11839 | Patient074E  | Patient099A |
| 11839 | Patient097A  | Patient224A |
| 11839 | Patient097E  | Patient224A |
| 11840 | Patient074B  | Patient246C |
| 11840 | Patient079A1 | Patient126C |
| 11841 | Patient074A  | Patient246C |
| 11841 | Patient074C  | Patient127A |
| 11841 | Patient074D  | Patient246C |
| 11841 | Patient074E  | Patient263B |
| 11841 | Patient079A2 | Patient126C |
| 11842 | Patient074B  | Patient127A |
| 11842 | Patient074C  | Patient127B |
| 11842 | Patient074C  | Patient246B |
| 11842 | Patient074E  | Patient099D |
| 11842 | Patient097B  | Patient103B |
| 11842 | Patient097B  | Patient103C |
| 11843 | Patient074A  | Patient127A |
| 11843 | Patient074B  | Patient127B |
| 11843 | Patient074B  | Patient246B |
| 11843 | Patient074D  | Patient127A |
| 11844 | Patient074A  | Patient127B |
| 11844 | Patient074A  | Patient246B |
| 11844 | Patient074D  | Patient127B |
| 11844 | Patient074D  | Patient246B |
| 11844 | Patient074E  | Patient246C |
| 11846 | Patient074E  | Patient127A |
| 11847 | Patient074C  | Patient246D |
| 11847 | Patient074E  | Patient127B |
| 11847 | Patient097D  | Patient120A |
| 11847 | Patient181B  | Patient252A |
| 11848 | Patient074B  | Patient246D |
| 11848 | Patient074C  | Patient246E |
| 11848 | Patient074E  | Patient246B |
| 11848 | Patient097C  | Patient224A |
| 11849 | Patient074A  | Patient246D |
| 11849 | Patient074B  | Patient246E |
| 11850 | Patient074A  | Patient246E |
| 11850 | Patient074C  | Patient184  |
| 11850 | Patient074D  | Patient246D |
| 11850 | Patient074D  | Patient246E |
| 11850 | Patient079B  | Patient126C |
| 11850 | Patient173A  | Patient252A |
| 11850 | Patient181A  | Patient252A |

|       |              |             |
|-------|--------------|-------------|
| 11851 | Patient045D  | Patient074C |
| 11851 | Patient074B  | Patient184  |
| 11851 | Patient181B  | Patient252B |
| 11852 | Patient045D  | Patient074B |
| 11852 | Patient074A  | Patient184  |
| 11852 | Patient074D  | Patient184  |
| 11852 | Patient173A  | Patient252B |
| 11853 | Patient045D  | Patient074A |
| 11853 | Patient074E  | Patient246D |
| 11853 | Patient074E  | Patient246E |
| 11853 | Patient181A  | Patient252B |
| 11854 | Patient021A1 | Patient074C |
| 11854 | Patient021A2 | Patient074C |
| 11854 | Patient045D  | Patient074D |
| 11854 | Patient097D  | Patient224A |
| 11855 | Patient021A1 | Patient074A |
| 11855 | Patient021A1 | Patient074B |
| 11855 | Patient021A2 | Patient074A |
| 11855 | Patient021A2 | Patient074B |
| 11855 | Patient074E  | Patient184  |
| 11855 | Patient097B  | Patient120A |
| 11856 | Patient021A1 | Patient074D |
| 11856 | Patient021A2 | Patient074D |
| 11856 | Patient181B  | Patient252F |
| 11857 | Patient173A  | Patient252F |
| 11858 | Patient181A  | Patient252F |
| 11859 | Patient021A1 | Patient074E |
| 11859 | Patient021A2 | Patient074E |
| 11859 | Patient045D  | Patient074E |
| 11860 | Patient097B  | Patient224A |
| 11861 | Patient079C  | Patient120A |
| 11864 | Patient079A1 | Patient120A |
| 11864 | Patient079A2 | Patient120A |
| 11864 | Patient097A  | Patient224B |
| 11865 | Patient097E  | Patient224B |
| 11866 | Patient126A  | Patient252A |
| 11869 | Patient108A  | Patient181A |
| 11869 | Patient126A  | Patient252B |
| 11870 | Patient108A  | Patient181B |
| 11872 | Patient079C  | Patient195  |
| 11872 | Patient126A  | Patient252F |
| 11873 | Patient079B  | Patient120A |
| 11873 | Patient109C  | Patient181B |
| 11874 | Patient108G  | Patient181B |
| 11875 | Patient097C  | Patient224B |
| 11875 | Patient108A  | Patient120A |
| 11875 | Patient108G  | Patient181A |
| 11875 | Patient108H  | Patient181B |
| 11875 | Patient109C  | Patient181A |
| 11876 | Patient079A1 | Patient195  |

|       |              |             |
|-------|--------------|-------------|
| 11876 | Patient079A2 | Patient195  |
| 11876 | Patient224B  | Patient252A |
| 11877 | Patient097D  | Patient224B |
| 11878 | Patient108H  | Patient181A |
| 11878 | Patient109E  | Patient181A |
| 11878 | Patient109E  | Patient181B |
| 11879 | Patient109D  | Patient181B |
| 11879 | Patient224B  | Patient252B |
| 11880 | Patient108A  | Patient173A |
| 11880 | Patient108G  | Patient120A |
| 11880 | Patient109A  | Patient181B |
| 11880 | Patient109C  | Patient120A |
| 11881 | Patient109B  | Patient181B |
| 11881 | Patient109E  | Patient120A |
| 11882 | Patient108F  | Patient181B |
| 11882 | Patient108H  | Patient120A |
| 11882 | Patient109D  | Patient181A |
| 11883 | Patient109A  | Patient181A |
| 11883 | Patient109B  | Patient181A |
| 11884 | Patient079B  | Patient195  |
| 11884 | Patient108F  | Patient181A |
| 11884 | Patient224B  | Patient252F |
| 11885 | Patient108D  | Patient181B |
| 11886 | Patient097A  | Patient195  |
| 11886 | Patient108G  | Patient173A |
| 11886 | Patient109B  | Patient120A |
| 11886 | Patient109C  | Patient173A |
| 11886 | Patient109D  | Patient120A |
| 11887 | Patient097B  | Patient224B |
| 11887 | Patient108D  | Patient181A |
| 11887 | Patient109A  | Patient120A |
| 11888 | Patient097E  | Patient195  |
| 11888 | Patient108H  | Patient173A |
| 11889 | Patient108F  | Patient120A |
| 11889 | Patient109E  | Patient173A |
| 11889 | Patient224A  | Patient252A |
| 11890 | Patient097D  | Patient195  |
| 11890 | Patient121A  | Patient222D |
| 11891 | Patient195   | Patient252A |
| 11891 | Patient224A  | Patient252B |
| 11892 | Patient108D  | Patient120A |
| 11892 | Patient109D  | Patient173A |
| 11893 | Patient109A  | Patient173A |
| 11893 | Patient195   | Patient252B |
| 11894 | Patient108F  | Patient173A |
| 11894 | Patient109B  | Patient173A |
| 11896 | Patient097B  | Patient195  |
| 11896 | Patient108A  | Patient224B |
| 11896 | Patient121A  | Patient196D |
| 11896 | Patient195   | Patient252F |

|       |              |             |
|-------|--------------|-------------|
| 11896 | Patient224A  | Patient252F |
| 11897 | Patient097C  | Patient195  |
| 11898 | Patient108D  | Patient173A |
| 11900 | Patient103B  | Patient252A |
| 11900 | Patient103C  | Patient252A |
| 11900 | Patient109C  | Patient224B |
| 11902 | Patient079C  | Patient224B |
| 11902 | Patient103B  | Patient252B |
| 11902 | Patient108G  | Patient224B |
| 11903 | Patient079C  | Patient173A |
| 11903 | Patient103C  | Patient252B |
| 11903 | Patient108H  | Patient224B |
| 11903 | Patient109E  | Patient224B |
| 11905 | Patient079A1 | Patient224B |
| 11905 | Patient079A2 | Patient224B |
| 11906 | Patient079A1 | Patient173A |
| 11906 | Patient079A2 | Patient173A |
| 11906 | Patient103C  | Patient252F |
| 11906 | Patient109D  | Patient224B |
| 11907 | Patient103B  | Patient252F |
| 11908 | Patient079C  | Patient181A |
| 11908 | Patient079C  | Patient181B |
| 11908 | Patient109A  | Patient224B |
| 11909 | Patient079A1 | Patient181B |
| 11909 | Patient079A2 | Patient181B |
| 11910 | Patient108F  | Patient224B |
| 11910 | Patient109B  | Patient224B |
| 11911 | Patient079A1 | Patient181A |
| 11911 | Patient079A2 | Patient181A |
| 11912 | Patient108A  | Patient126A |
| 11914 | Patient079B  | Patient224B |
| 11914 | Patient108D  | Patient224B |
| 11914 | Patient109C  | Patient126A |
| 11915 | Patient108G  | Patient126A |
| 11916 | Patient108H  | Patient126A |
| 11917 | Patient079B  | Patient173A |
| 11917 | Patient109E  | Patient126A |
| 11919 | Patient079B  | Patient181B |
| 11919 | Patient109D  | Patient126A |
| 11921 | Patient079B  | Patient181A |
| 11922 | Patient109A  | Patient126A |
| 11923 | Patient108A  | Patient195  |
| 11923 | Patient108F  | Patient126A |
| 11923 | Patient109B  | Patient126A |
| 11926 | Patient108D  | Patient126A |
| 11928 | Patient108G  | Patient195  |
| 11929 | Patient109C  | Patient195  |
| 11930 | Patient108H  | Patient195  |
| 11931 | Patient109E  | Patient195  |
| 11933 | Patient079C  | Patient126A |

|       |              |             |
|-------|--------------|-------------|
| 11933 | Patient109D  | Patient195  |
| 11934 | Patient109B  | Patient195  |
| 11935 | Patient079A1 | Patient126A |
| 11935 | Patient079A2 | Patient126A |
| 11935 | Patient109A  | Patient195  |
| 11936 | Patient108F  | Patient195  |
| 11938 | Patient108D  | Patient195  |
| 11940 | Patient108A  | Patient224A |
| 11942 | Patient109C  | Patient224A |
| 11944 | Patient108G  | Patient224A |
| 11944 | Patient109E  | Patient224A |
| 11945 | Patient079B  | Patient126A |
| 11946 | Patient103C  | Patient108A |
| 11946 | Patient108H  | Patient224A |
| 11948 | Patient109D  | Patient224A |
| 11950 | Patient103B  | Patient108A |
| 11950 | Patient109A  | Patient224A |
| 11950 | Patient120D  | Patient252A |
| 11951 | Patient103B  | Patient109C |
| 11951 | Patient103C  | Patient108G |
| 11951 | Patient108F  | Patient224A |
| 11951 | Patient109B  | Patient224A |
| 11952 | Patient103B  | Patient108G |
| 11952 | Patient103C  | Patient109C |
| 11952 | Patient120D  | Patient252B |
| 11953 | Patient103B  | Patient108H |
| 11953 | Patient103C  | Patient108H |
| 11953 | Patient103C  | Patient109E |
| 11955 | Patient103B  | Patient109E |
| 11956 | Patient097E  | Patient120D |
| 11956 | Patient108D  | Patient224A |
| 11957 | Patient103B  | Patient109D |
| 11957 | Patient103C  | Patient109D |
| 11957 | Patient120D  | Patient252F |
| 11958 | Patient097A  | Patient120D |
| 11958 | Patient103B  | Patient109A |
| 11958 | Patient103C  | Patient109A |
| 11959 | Patient103B  | Patient108F |
| 11959 | Patient103B  | Patient109B |
| 11959 | Patient103C  | Patient108F |
| 11960 | Patient097A  | Patient120B |
| 11960 | Patient097E  | Patient120B |
| 11961 | Patient103C  | Patient109B |
| 11963 | Patient103B  | Patient108D |
| 11963 | Patient103C  | Patient108D |
| 11963 | Patient120B  | Patient252A |
| 11964 | Patient097A  | Patient120C |
| 11964 | Patient097E  | Patient120C |
| 11965 | Patient120B  | Patient252B |
| 11967 | Patient120C  | Patient252A |

|       |              |             |
|-------|--------------|-------------|
| 11968 | Patient097C  | Patient120D |
| 11969 | Patient120C  | Patient252B |
| 11970 | Patient120B  | Patient252F |
| 11972 | Patient097C  | Patient120B |
| 11972 | Patient097D  | Patient120D |
| 11973 | Patient074C  | Patient252A |
| 11973 | Patient074C  | Patient252B |
| 11974 | Patient074B  | Patient252A |
| 11974 | Patient074B  | Patient252B |
| 11974 | Patient120C  | Patient252F |
| 11975 | Patient074A  | Patient252A |
| 11975 | Patient074A  | Patient252B |
| 11975 | Patient074D  | Patient252A |
| 11975 | Patient074D  | Patient252B |
| 11976 | Patient097C  | Patient120C |
| 11978 | Patient074E  | Patient252A |
| 11978 | Patient074E  | Patient252B |
| 11978 | Patient079C  | Patient103C |
| 11978 | Patient097B  | Patient120D |
| 11980 | Patient079C  | Patient103B |
| 11981 | Patient079A1 | Patient103B |
| 11981 | Patient079A1 | Patient103C |
| 11981 | Patient079A2 | Patient103B |
| 11981 | Patient079A2 | Patient103C |
| 11983 | Patient074C  | Patient252F |
| 11983 | Patient097D  | Patient120B |
| 11984 | Patient074B  | Patient252F |
| 11984 | Patient079C  | Patient120D |
| 11985 | Patient074A  | Patient252F |
| 11985 | Patient074D  | Patient252F |
| 11986 | Patient074C  | Patient097A |
| 11986 | Patient079A1 | Patient120D |
| 11986 | Patient079A2 | Patient120D |
| 11987 | Patient074B  | Patient097A |
| 11987 | Patient074C  | Patient097E |
| 11987 | Patient097D  | Patient120C |
| 11988 | Patient074A  | Patient097A |
| 11988 | Patient074B  | Patient097E |
| 11988 | Patient074E  | Patient252F |
| 11989 | Patient074A  | Patient097E |
| 11989 | Patient074D  | Patient097A |
| 11989 | Patient074D  | Patient097E |
| 11991 | Patient079B  | Patient103B |
| 11991 | Patient079B  | Patient103C |
| 11991 | Patient097B  | Patient120B |
| 11992 | Patient074E  | Patient097E |
| 11993 | Patient074E  | Patient097A |
| 11994 | Patient079C  | Patient224A |
| 11995 | Patient079A1 | Patient224A |
| 11995 | Patient079A2 | Patient224A |

|       |              |             |
|-------|--------------|-------------|
| 11995 | Patient079B  | Patient120D |
| 11995 | Patient097B  | Patient120C |
| 11996 | Patient079C  | Patient120B |
| 11997 | Patient074C  | Patient097C |
| 11998 | Patient074B  | Patient097C |
| 11999 | Patient074A  | Patient097C |
| 11999 | Patient074D  | Patient097C |
| 11999 | Patient079A1 | Patient120B |
| 11999 | Patient079A2 | Patient120B |
| 11999 | Patient108A  | Patient120D |
| 12000 | Patient074C  | Patient097D |
| 12000 | Patient079C  | Patient120C |
| 12001 | Patient074B  | Patient097D |
| 12001 | Patient109C  | Patient120D |
| 12001 | Patient109E  | Patient120D |
| 12002 | Patient074A  | Patient097D |
| 12002 | Patient074E  | Patient097C |
| 12002 | Patient108G  | Patient120D |
| 12003 | Patient074D  | Patient097D |
| 12003 | Patient079A1 | Patient120C |
| 12003 | Patient079A2 | Patient120C |
| 12003 | Patient108H  | Patient120D |
| 12005 | Patient079B  | Patient224A |
| 12007 | Patient074E  | Patient097D |
| 12007 | Patient109D  | Patient120D |
| 12008 | Patient079B  | Patient120B |
| 12008 | Patient109A  | Patient120D |
| 12008 | Patient109B  | Patient120D |
| 12009 | Patient074C  | Patient097B |
| 12010 | Patient074B  | Patient097B |
| 12011 | Patient074A  | Patient097B |
| 12011 | Patient074D  | Patient097B |
| 12011 | Patient108A  | Patient120B |
| 12011 | Patient108F  | Patient120D |
| 12012 | Patient079B  | Patient120C |
| 12013 | Patient108D  | Patient120D |
| 12014 | Patient074E  | Patient097B |
| 12015 | Patient108A  | Patient120C |
| 12016 | Patient108G  | Patient120B |
| 12016 | Patient109C  | Patient120B |
| 12018 | Patient108H  | Patient120B |
| 12019 | Patient109E  | Patient120B |
| 12020 | Patient108G  | Patient120C |
| 12020 | Patient109C  | Patient120C |
| 12021 | Patient109E  | Patient120C |
| 12022 | Patient108H  | Patient120C |
| 12022 | Patient109B  | Patient120B |
| 12022 | Patient109D  | Patient120B |
| 12023 | Patient109A  | Patient120B |
| 12026 | Patient108F  | Patient120B |



|       |             |              |
|-------|-------------|--------------|
| 12026 | Patient109B | Patient120C  |
| 12026 | Patient109D | Patient120C  |
| 12027 | Patient109A | Patient120C  |
| 12028 | Patient108D | Patient120B  |
| 12030 | Patient108F | Patient120C  |
| 12032 | Patient108D | Patient120C  |
| 12037 | Patient074C | Patient079C  |
| 12038 | Patient074B | Patient079C  |
| 12039 | Patient074A | Patient079C  |
| 12040 | Patient074C | Patient079A1 |
| 12040 | Patient074C | Patient079A2 |
| 12040 | Patient074D | Patient079C  |
| 12041 | Patient074B | Patient079A1 |
| 12041 | Patient074B | Patient079A2 |
| 12042 | Patient074A | Patient079A1 |
| 12042 | Patient074A | Patient079A2 |
| 12042 | Patient074D | Patient079A1 |
| 12042 | Patient074D | Patient079A2 |
| 12044 | Patient074C | Patient108A  |
| 12044 | Patient074E | Patient079C  |
| 12045 | Patient074B | Patient108A  |
| 12045 | Patient074E | Patient079A1 |
| 12045 | Patient074E | Patient079A2 |
| 12046 | Patient074A | Patient108A  |
| 12047 | Patient074D | Patient108A  |
| 12049 | Patient074C | Patient079B  |
| 12049 | Patient074C | Patient108G  |
| 12049 | Patient074C | Patient109C  |
| 12050 | Patient074B | Patient079B  |
| 12050 | Patient074B | Patient108G  |
| 12050 | Patient074B | Patient109C  |
| 12051 | Patient074A | Patient079B  |
| 12051 | Patient074A | Patient108G  |
| 12051 | Patient074A | Patient109C  |
| 12051 | Patient074C | Patient108H  |
| 12051 | Patient074C | Patient109E  |
| 12051 | Patient074D | Patient079B  |
| 12051 | Patient074D | Patient109C  |
| 12051 | Patient074E | Patient108A  |
| 12052 | Patient074B | Patient108H  |
| 12052 | Patient074B | Patient109E  |
| 12052 | Patient074D | Patient108G  |
| 12053 | Patient074A | Patient108H  |
| 12053 | Patient074A | Patient109E  |
| 12053 | Patient074D | Patient108H  |
| 12053 | Patient074D | Patient109E  |
| 12054 | Patient074E | Patient079B  |
| 12054 | Patient074E | Patient109C  |
| 12055 | Patient074C | Patient109D  |
| 12055 | Patient074E | Patient108G  |

|       |             |             |
|-------|-------------|-------------|
| 12056 | Patient074B | Patient109D |
| 12056 | Patient074C | Patient109A |
| 12056 | Patient074E | Patient108H |
| 12056 | Patient074E | Patient109E |
| 12057 | Patient074A | Patient109D |
| 12057 | Patient074B | Patient109A |
| 12057 | Patient074C | Patient108F |
| 12057 | Patient074C | Patient109B |
| 12057 | Patient074D | Patient109D |
| 12058 | Patient074A | Patient109A |
| 12058 | Patient074B | Patient108F |
| 12058 | Patient074B | Patient109B |
| 12058 | Patient074D | Patient109A |
| 12059 | Patient074A | Patient108F |
| 12059 | Patient074A | Patient109B |
| 12059 | Patient074D | Patient108F |
| 12059 | Patient074D | Patient109B |
| 12060 | Patient074E | Patient109D |
| 12061 | Patient074C | Patient108D |
| 12061 | Patient074E | Patient109A |
| 12062 | Patient074B | Patient108D |
| 12062 | Patient074E | Patient108F |
| 12062 | Patient074E | Patient109B |
| 12063 | Patient074A | Patient108D |
| 12063 | Patient074D | Patient108D |
| 12066 | Patient074E | Patient108D |
| 15546 | Patient056  | Patient135  |
| 15580 | Patient135  | Patient201C |
| 15580 | Patient135  | Patient254  |
| 15585 | Patient135  | Patient201D |
| 15594 | Patient091B | Patient135  |
| 15595 | Patient066B | Patient135  |
| 15605 | Patient135  | Patient191  |
| 15651 | Patient005  | Patient135  |
| 15683 | Patient056  | Patient062  |
| 15700 | Patient062  | Patient091B |
| 15722 | Patient062  | Patient066B |
| 15782 | Patient062  | Patient201C |
| 15784 | Patient062  | Patient201D |
| 15856 | Patient005  | Patient062  |
| 15964 | Patient062  | Patient191  |
| 16007 | Patient062  | Patient254  |
| 18388 | Patient062  | Patient149A |
| 18406 | Patient135  | Patient149A |
| 18464 | Patient056  | Patient149A |
| 18554 | Patient091B | Patient149A |
| 18607 | Patient022A | Patient056  |
| 18618 | Patient022A | Patient135  |
| 18632 | Patient149A | Patient201C |
| 18634 | Patient149A | Patient201D |

|       |              |              |
|-------|--------------|--------------|
| 18635 | Patient022A  | Patient091B  |
| 18647 | Patient066B  | Patient149A  |
| 18657 | Patient005   | Patient022A  |
| 18658 | Patient022A  | Patient066B  |
| 18661 | Patient022A  | Patient062   |
| 18663 | Patient005   | Patient149A  |
| 18688 | Patient022A  | Patient201C  |
| 18692 | Patient022A  | Patient201D  |
| 18832 | Patient022A  | Patient254   |
| 18872 | Patient032D  | Patient135   |
| 18885 | Patient022A  | Patient191   |
| 18900 | Patient072   | Patient135   |
| 18944 | Patient135   | Patient251   |
| 18950 | Patient135   | Patient146   |
| 18985 | Patient091A  | Patient135   |
| 18994 | Patient092C  | Patient135   |
| 18996 | Patient149A  | Patient254   |
| 18997 | Patient135   | Patient189C2 |
| 18999 | Patient135   | Patient189C1 |
| 19025 | Patient135   | Patient194   |
| 19028 | Patient013   | Patient135   |
| 19036 | Patient114   | Patient135   |
| 19041 | Patient149A  | Patient191   |
| 19042 | Patient135   | Patient258A1 |
| 19042 | Patient135   | Patient258G  |
| 19043 | Patient135   | Patient258D  |
| 19043 | Patient135   | Patient258F  |
| 19044 | Patient092D  | Patient135   |
| 19044 | Patient135   | Patient258B  |
| 19045 | Patient135   | Patient258A2 |
| 19057 | Patient053A1 | Patient135   |
| 19072 | Patient090   | Patient135   |
| 19075 | Patient100B  | Patient135   |
| 19079 | Patient135   | Patient258E  |
| 19083 | Patient135   | Patient179   |
| 19084 | Patient081C  | Patient135   |
| 19085 | Patient135   | Patient261G  |
| 19089 | Patient135   | Patient217F  |
| 19090 | Patient135   | Patient217A  |
| 19091 | Patient135   | Patient176   |
| 19093 | Patient135   | Patient217B  |
| 19093 | Patient135   | Patient217C  |
| 19093 | Patient135   | Patient217E  |
| 19093 | Patient135   | Patient217I  |
| 19094 | Patient133   | Patient135   |
| 19094 | Patient135   | Patient217D  |
| 19094 | Patient135   | Patient217H  |
| 19096 | Patient081D  | Patient135   |
| 19096 | Patient135   | Patient217J  |
| 19099 | Patient062   | Patient092C  |

|       |              |             |
|-------|--------------|-------------|
| 19099 | Patient135   | Patient235A |
| 19101 | Patient058   | Patient135  |
| 19101 | Patient135   | Patient193  |
| 19102 | Patient135   | Patient241  |
| 19104 | Patient022B  | Patient135  |
| 19104 | Patient135   | Patient141F |
| 19109 | Patient026C  | Patient135  |
| 19110 | Patient135   | Patient141G |
| 19113 | Patient135   | Patient230C |
| 19114 | Patient032D  | Patient062  |
| 19115 | Patient135   | Patient230G |
| 19116 | Patient135   | Patient167  |
| 19117 | Patient135   | Patient207  |
| 19118 | Patient089A1 | Patient135  |
| 19122 | Patient135   | Patient164  |
| 19123 | Patient135   | Patient145B |
| 19124 | Patient135   | Patient261E |
| 19125 | Patient135   | Patient242  |
| 19126 | Patient032E  | Patient135  |
| 19129 | Patient032C  | Patient135  |
| 19129 | Patient089A2 | Patient135  |
| 19130 | Patient081B  | Patient135  |
| 19133 | Patient088   | Patient135  |
| 19133 | Patient135   | Patient206  |
| 19134 | Patient081E  | Patient135  |
| 19135 | Patient081A1 | Patient135  |
| 19135 | Patient081F  | Patient135  |
| 19135 | Patient135   | Patient261C |
| 19136 | Patient081A2 | Patient135  |
| 19137 | Patient031   | Patient062  |
| 19138 | Patient135   | Patient141D |
| 19138 | Patient135   | Patient171  |
| 19150 | Patient032D  | Patient056  |
| 19151 | Patient062   | Patient072  |
| 19151 | Patient135   | Patient141A |
| 19151 | Patient135   | Patient141B |
| 19151 | Patient135   | Patient230D |
| 19152 | Patient135   | Patient202  |
| 19153 | Patient135   | Patient261A |
| 19154 | Patient135   | Patient141C |
| 19155 | Patient032B  | Patient135  |
| 19156 | Patient032D  | Patient066B |
| 19157 | Patient120A  | Patient135  |
| 19157 | Patient135   | Patient161B |
| 19157 | Patient135   | Patient261B |
| 19160 | Patient029   | Patient135  |
| 19161 | Patient032D  | Patient091B |
| 19161 | Patient135   | Patient230A |
| 19162 | Patient069   | Patient135  |
| 19162 | Patient086C  | Patient135  |

|       |              |             |
|-------|--------------|-------------|
| 19163 | Patient032A  | Patient135  |
| 19163 | Patient034A  | Patient135  |
| 19163 | Patient135   | Patient192D |
| 19163 | Patient135   | Patient220B |
| 19164 | Patient128   | Patient135  |
| 19165 | Patient005   | Patient032D |
| 19166 | Patient034B  | Patient135  |
| 19166 | Patient135   | Patient230E |
| 19167 | Patient034C  | Patient135  |
| 19167 | Patient034E  | Patient135  |
| 19167 | Patient135   | Patient145C |
| 19167 | Patient135   | Patient261D |
| 19168 | Patient034D  | Patient135  |
| 19168 | Patient066B  | Patient092C |
| 19169 | Patient005   | Patient251  |
| 19169 | Patient135   | Patient181B |
| 19169 | Patient135   | Patient224B |
| 19170 | Patient091B  | Patient092C |
| 19171 | Patient055   | Patient135  |
| 19171 | Patient062   | Patient091A |
| 19171 | Patient135   | Patient230F |
| 19172 | Patient005   | Patient092C |
| 19172 | Patient103A  | Patient135  |
| 19173 | Patient053A1 | Patient056  |
| 19173 | Patient056   | Patient072  |
| 19173 | Patient066F  | Patient135  |
| 19174 | Patient135   | Patient181A |
| 19178 | Patient026D  | Patient135  |
| 19178 | Patient055   | Patient056  |
| 19178 | Patient066D  | Patient135  |
| 19178 | Patient066E  | Patient135  |
| 19178 | Patient135   | Patient230B |
| 19179 | Patient026E  | Patient135  |
| 19179 | Patient121A  | Patient135  |
| 19179 | Patient135   | Patient238  |
| 19181 | Patient086A  | Patient135  |
| 19181 | Patient135   | Patient145A |
| 19181 | Patient135   | Patient180  |
| 19182 | Patient032D  | Patient201C |
| 19182 | Patient086E  | Patient135  |
| 19183 | Patient053A1 | Patient066B |
| 19183 | Patient056   | Patient092C |
| 19183 | Patient066B  | Patient072  |
| 19184 | Patient121B  | Patient135  |
| 19185 | Patient086B  | Patient135  |
| 19187 | Patient032D  | Patient201D |
| 19187 | Patient062   | Patient194  |
| 19187 | Patient135   | Patient183A |
| 19188 | Patient135   | Patient183D |
| 19190 | Patient045A  | Patient135  |

|       |              |              |
|-------|--------------|--------------|
| 19191 | Patient005   | Patient053A1 |
| 19191 | Patient045C  | Patient135   |
| 19194 | Patient045B  | Patient135   |
| 19194 | Patient056   | Patient251   |
| 19194 | Patient062   | Patient092D  |
| 19194 | Patient072   | Patient091B  |
| 19195 | Patient005   | Patient072   |
| 19195 | Patient135   | Patient177   |
| 19195 | Patient135   | Patient224A  |
| 19196 | Patient053A1 | Patient091B  |
| 19196 | Patient135   | Patient183B  |
| 19198 | Patient135   | Patient235E  |
| 19199 | Patient062   | Patient146   |
| 19199 | Patient135   | Patient235F  |
| 19202 | Patient135   | Patient183C  |
| 19203 | Patient135   | Patient150C  |
| 19204 | Patient103D  | Patient135   |
| 19205 | Patient031   | Patient135   |
| 19206 | Patient103C  | Patient135   |
| 19206 | Patient135   | Patient183E  |
| 19207 | Patient072   | Patient201C  |
| 19208 | Patient092C  | Patient201C  |
| 19208 | Patient103E  | Patient135   |
| 19208 | Patient135   | Patient150A  |
| 19209 | Patient072   | Patient201D  |
| 19211 | Patient053C  | Patient135   |
| 19211 | Patient103B  | Patient135   |
| 19212 | Patient013   | Patient062   |
| 19212 | Patient092C  | Patient201D  |
| 19213 | Patient074D  | Patient135   |
| 19213 | Patient135   | Patient213A  |
| 19214 | Patient074B  | Patient135   |
| 19215 | Patient053A2 | Patient135   |
| 19216 | Patient053B  | Patient135   |
| 19216 | Patient062   | Patient075   |
| 19216 | Patient074C  | Patient135   |
| 19217 | Patient074A  | Patient135   |
| 19218 | Patient123A  | Patient135   |
| 19218 | Patient123C  | Patient135   |
| 19218 | Patient135   | Patient150B  |
| 19220 | Patient074E  | Patient135   |
| 19221 | Patient013   | Patient056   |
| 19221 | Patient123B  | Patient135   |
| 19222 | Patient053A1 | Patient201C  |
| 19224 | Patient026A  | Patient135   |
| 19225 | Patient053A1 | Patient201D  |
| 19225 | Patient126A  | Patient135   |
| 19226 | Patient026F  | Patient135   |
| 19227 | Patient062   | Patient251   |
| 19229 | Patient123D  | Patient135   |

|       |              |             |
|-------|--------------|-------------|
| 19230 | Patient005   | Patient055  |
| 19230 | Patient092G  | Patient135  |
| 19230 | Patient092H  | Patient135  |
| 19231 | Patient026B  | Patient135  |
| 19232 | Patient126C  | Patient135  |
| 19237 | Patient091B  | Patient092D |
| 19237 | Patient135   | Patient195  |
| 19237 | Patient135   | Patient235C |
| 19237 | Patient201C  | Patient251  |
| 19239 | Patient066B  | Patient092D |
| 19240 | Patient201D  | Patient251  |
| 19243 | Patient135   | Patient235B |
| 19244 | Patient005   | Patient092D |
| 19246 | Patient056   | Patient220B |
| 19248 | Patient135   | Patient192A |
| 19251 | Patient053A1 | Patient062  |
| 19251 | Patient090   | Patient091B |
| 19253 | Patient056   | Patient090  |
| 19253 | Patient135   | Patient173A |
| 19253 | Patient135   | Patient192C |
| 19255 | Patient056   | Patient092D |
| 19256 | Patient055   | Patient091B |
| 19256 | Patient135   | Patient192E |
| 19257 | Patient135   | Patient192B |
| 19258 | Patient092E  | Patient135  |
| 19258 | Patient135   | Patient173B |
| 19260 | Patient005   | Patient090  |
| 19260 | Patient092A  | Patient135  |
| 19261 | Patient092B  | Patient135  |
| 19262 | Patient007A  | Patient135  |
| 19265 | Patient007B  | Patient135  |
| 19265 | Patient135   | Patient192F |
| 19266 | Patient056   | Patient242  |
| 19266 | Patient062   | Patient207  |
| 19272 | Patient056   | Patient192D |
| 19272 | Patient062   | Patient090  |
| 19274 | Patient091B  | Patient251  |
| 19275 | Patient056   | Patient241  |
| 19277 | Patient055   | Patient066B |
| 19283 | Patient092D  | Patient201C |
| 19285 | Patient022B  | Patient062  |
| 19285 | Patient055   | Patient062  |
| 19285 | Patient056   | Patient235A |
| 19285 | Patient062   | Patient133  |
| 19287 | Patient005   | Patient013  |
| 19287 | Patient062   | Patient128  |
| 19287 | Patient066B  | Patient090  |
| 19287 | Patient092D  | Patient201D |
| 19290 | Patient056   | Patient258F |
| 19290 | Patient062   | Patient261G |

|       |             |              |
|-------|-------------|--------------|
| 19290 | Patient066B | Patient258F  |
| 19290 | Patient201C | Patient207   |
| 19291 | Patient056  | Patient258B  |
| 19291 | Patient066B | Patient258B  |
| 19291 | Patient066B | Patient258D  |
| 19292 | Patient031  | Patient056   |
| 19292 | Patient066B | Patient258A1 |
| 19292 | Patient066B | Patient258A2 |
| 19292 | Patient091B | Patient220B  |
| 19292 | Patient201D | Patient207   |
| 19293 | Patient056  | Patient258A2 |
| 19293 | Patient056  | Patient258G  |
| 19293 | Patient066B | Patient258G  |
| 19294 | Patient033  | Patient135   |
| 19294 | Patient056  | Patient258A1 |
| 19294 | Patient056  | Patient258D  |
| 19298 | Patient120B | Patient135   |
| 19299 | Patient062  | Patient189C1 |
| 19300 | Patient055  | Patient201C  |
| 19301 | Patient056  | Patient128   |
| 19301 | Patient091B | Patient258A1 |
| 19301 | Patient091B | Patient258F  |
| 19302 | Patient056  | Patient258E  |
| 19302 | Patient062  | Patient189C2 |
| 19302 | Patient091B | Patient258B  |
| 19302 | Patient091B | Patient258D  |
| 19302 | Patient120D | Patient135   |
| 19303 | Patient055  | Patient201D  |
| 19303 | Patient062  | Patient141G  |
| 19303 | Patient066B | Patient258E  |
| 19303 | Patient091B | Patient258A2 |
| 19303 | Patient201C | Patient258F  |
| 19304 | Patient091B | Patient258G  |
| 19304 | Patient120C | Patient135   |
| 19304 | Patient201C | Patient258B  |
| 19304 | Patient201C | Patient258D  |
| 19305 | Patient201C | Patient258A1 |
| 19305 | Patient201C | Patient258A2 |
| 19305 | Patient201C | Patient258G  |
| 19305 | Patient201D | Patient258F  |
| 19306 | Patient201D | Patient258D  |
| 19307 | Patient066B | Patient192D  |
| 19307 | Patient201D | Patient258A2 |
| 19307 | Patient201D | Patient258B  |
| 19307 | Patient201D | Patient258G  |
| 19308 | Patient062  | Patient242   |
| 19308 | Patient201D | Patient258A1 |
| 19309 | Patient091B | Patient207   |
| 19310 | Patient062  | Patient086C  |
| 19311 | Patient062  | Patient206   |



|       |             |              |
|-------|-------------|--------------|
| 19312 | Patient013  | Patient066B  |
| 19313 | Patient056  | Patient207   |
| 19314 | Patient062  | Patient145B  |
| 19314 | Patient091B | Patient258E  |
| 19316 | Patient026C | Patient056   |
| 19316 | Patient056  | Patient217A  |
| 19317 | Patient062  | Patient086A  |
| 19317 | Patient062  | Patient086E  |
| 19317 | Patient062  | Patient167   |
| 19318 | Patient058  | Patient062   |
| 19318 | Patient062  | Patient086B  |
| 19318 | Patient062  | Patient141F  |
| 19318 | Patient062  | Patient230C  |
| 19318 | Patient062  | Patient241   |
| 19319 | Patient013  | Patient201C  |
| 19319 | Patient091B | Patient192D  |
| 19320 | Patient013  | Patient201D  |
| 19321 | Patient062  | Patient261E  |
| 19322 | Patient056  | Patient217B  |
| 19322 | Patient056  | Patient217E  |
| 19322 | Patient056  | Patient217F  |
| 19322 | Patient056  | Patient217I  |
| 19322 | Patient062  | Patient176   |
| 19323 | Patient056  | Patient217D  |
| 19323 | Patient062  | Patient258A1 |
| 19323 | Patient066B | Patient217A  |
| 19323 | Patient201C | Patient258E  |
| 19324 | Patient032E | Patient062   |
| 19324 | Patient056  | Patient217C  |
| 19324 | Patient056  | Patient217H  |
| 19324 | Patient062  | Patient258F  |
| 19324 | Patient201D | Patient258E  |
| 19325 | Patient062  | Patient258A2 |
| 19325 | Patient062  | Patient261C  |
| 19326 | Patient062  | Patient258B  |
| 19327 | Patient032C | Patient062   |
| 19327 | Patient062  | Patient230G  |
| 19327 | Patient062  | Patient258G  |
| 19327 | Patient091B | Patient217A  |
| 19328 | Patient056  | Patient217J  |
| 19329 | Patient013  | Patient091B  |
| 19329 | Patient056  | Patient141G  |
| 19330 | Patient028  | Patient135   |
| 19330 | Patient056  | Patient206   |
| 19330 | Patient062  | Patient258D  |
| 19330 | Patient072  | Patient254   |
| 19330 | Patient192D | Patient201C  |
| 19330 | Patient192D | Patient201D  |
| 19331 | Patient062  | Patient081C  |
| 19331 | Patient066B | Patient217B  |

|       |              |              |
|-------|--------------|--------------|
| 19331 | Patient066B  | Patient217E  |
| 19331 | Patient066B  | Patient217F  |
| 19331 | Patient066B  | Patient217I  |
| 19332 | Patient005   | Patient031   |
| 19332 | Patient056   | Patient146   |
| 19332 | Patient066B  | Patient217D  |
| 19332 | Patient201C  | Patient217A  |
| 19333 | Patient062   | Patient089A1 |
| 19333 | Patient066B  | Patient217C  |
| 19333 | Patient066B  | Patient217H  |
| 19334 | Patient062   | Patient081D  |
| 19334 | Patient075   | Patient135   |
| 19335 | Patient005   | Patient128   |
| 19335 | Patient066B  | Patient235A  |
| 19335 | Patient086C  | Patient201C  |
| 19335 | Patient091B  | Patient217B  |
| 19335 | Patient091B  | Patient217E  |
| 19335 | Patient091B  | Patient217F  |
| 19335 | Patient091B  | Patient217I  |
| 19335 | Patient201D  | Patient217A  |
| 19336 | Patient066B  | Patient086C  |
| 19336 | Patient091B  | Patient217D  |
| 19337 | Patient062   | Patient088   |
| 19337 | Patient062   | Patient261A  |
| 19337 | Patient066B  | Patient217J  |
| 19337 | Patient090   | Patient201C  |
| 19337 | Patient091B  | Patient217C  |
| 19337 | Patient091B  | Patient217H  |
| 19338 | Patient026C  | Patient066B  |
| 19338 | Patient062   | Patient089A2 |
| 19338 | Patient066B  | Patient141G  |
| 19338 | Patient086C  | Patient091B  |
| 19338 | Patient086C  | Patient201D  |
| 19339 | Patient028   | Patient062   |
| 19339 | Patient053C  | Patient062   |
| 19339 | Patient066B  | Patient241   |
| 19339 | Patient091B  | Patient235A  |
| 19340 | Patient005   | Patient141G  |
| 19340 | Patient090   | Patient201D  |
| 19340 | Patient201C  | Patient217B  |
| 19340 | Patient201C  | Patient217E  |
| 19340 | Patient201C  | Patient217F  |
| 19341 | Patient026C  | Patient091B  |
| 19341 | Patient053A2 | Patient062   |
| 19341 | Patient056   | Patient081B  |
| 19341 | Patient091B  | Patient217J  |
| 19341 | Patient201C  | Patient217D  |
| 19342 | Patient053B  | Patient062   |
| 19342 | Patient056   | Patient081C  |
| 19342 | Patient066B  | Patient220B  |

|       |              |              |
|-------|--------------|--------------|
| 19342 | Patient201C  | Patient217C  |
| 19342 | Patient201C  | Patient217H  |
| 19342 | Patient201C  | Patient217I  |
| 19343 | Patient062   | Patient261D  |
| 19343 | Patient201C  | Patient241   |
| 19343 | Patient201D  | Patient217B  |
| 19343 | Patient201D  | Patient217E  |
| 19343 | Patient201D  | Patient217F  |
| 19344 | Patient062   | Patient145C  |
| 19344 | Patient091B  | Patient241   |
| 19344 | Patient201C  | Patient206   |
| 19344 | Patient201D  | Patient217D  |
| 19345 | Patient062   | Patient261B  |
| 19345 | Patient201D  | Patient217C  |
| 19345 | Patient201D  | Patient217H  |
| 19345 | Patient201D  | Patient217I  |
| 19346 | Patient056   | Patient120A  |
| 19346 | Patient056   | Patient202   |
| 19346 | Patient201C  | Patient217J  |
| 19346 | Patient201D  | Patient206   |
| 19347 | Patient022B  | Patient056   |
| 19347 | Patient086A  | Patient201C  |
| 19347 | Patient086E  | Patient201C  |
| 19347 | Patient201D  | Patient241   |
| 19348 | Patient053C  | Patient056   |
| 19348 | Patient056   | Patient081A1 |
| 19348 | Patient056   | Patient081E  |
| 19348 | Patient056   | Patient081F  |
| 19348 | Patient056   | Patient261G  |
| 19348 | Patient066B  | Patient086A  |
| 19348 | Patient066B  | Patient086E  |
| 19349 | Patient005   | Patient207   |
| 19349 | Patient056   | Patient081A2 |
| 19349 | Patient056   | Patient081D  |
| 19349 | Patient201D  | Patient217J  |
| 19350 | Patient031   | Patient066B  |
| 19350 | Patient056   | Patient086C  |
| 19350 | Patient062   | Patient093D  |
| 19350 | Patient062   | Patient183D  |
| 19350 | Patient086A  | Patient201D  |
| 19350 | Patient086E  | Patient201D  |
| 19350 | Patient091B  | Patient141G  |
| 19351 | Patient062   | Patient145A  |
| 19351 | Patient086B  | Patient201C  |
| 19352 | Patient005   | Patient086C  |
| 19352 | Patient053A2 | Patient056   |
| 19352 | Patient066B  | Patient081B  |
| 19352 | Patient066B  | Patient086B  |
| 19352 | Patient135   | Patient196F  |
| 19353 | Patient026C  | Patient201C  |

|       |              |              |
|-------|--------------|--------------|
| 19353 | Patient053B  | Patient056   |
| 19353 | Patient062   | Patient179   |
| 19353 | Patient062   | Patient258E  |
| 19353 | Patient086A  | Patient091B  |
| 19353 | Patient086E  | Patient091B  |
| 19354 | Patient005   | Patient146   |
| 19354 | Patient066B  | Patient261G  |
| 19354 | Patient086B  | Patient201D  |
| 19354 | Patient201C  | Patient235A  |
| 19355 | Patient026C  | Patient201D  |
| 19355 | Patient062   | Patient141D  |
| 19355 | Patient066B  | Patient081C  |
| 19356 | Patient005   | Patient258F  |
| 19356 | Patient032A  | Patient062   |
| 19356 | Patient062   | Patient081A2 |
| 19356 | Patient062   | Patient081B  |
| 19356 | Patient201D  | Patient235A  |
| 19357 | Patient005   | Patient258B  |
| 19357 | Patient005   | Patient258D  |
| 19357 | Patient005   | Patient261G  |
| 19357 | Patient034C  | Patient062   |
| 19357 | Patient053C  | Patient066B  |
| 19357 | Patient062   | Patient066A  |
| 19357 | Patient062   | Patient158   |
| 19357 | Patient086B  | Patient091B  |
| 19358 | Patient005   | Patient258A1 |
| 19358 | Patient005   | Patient258A2 |
| 19358 | Patient056   | Patient141F  |
| 19358 | Patient062   | Patient081A1 |
| 19358 | Patient091B  | Patient261G  |
| 19359 | Patient005   | Patient258G  |
| 19359 | Patient032B  | Patient062   |
| 19359 | Patient038   | Patient062   |
| 19359 | Patient056   | Patient086A  |
| 19359 | Patient056   | Patient086E  |
| 19359 | Patient062   | Patient093E  |
| 19359 | Patient066B  | Patient081A2 |
| 19359 | Patient066B  | Patient081E  |
| 19360 | Patient005   | Patient206   |
| 19360 | Patient062   | Patient081E  |
| 19360 | Patient062   | Patient081F  |
| 19360 | Patient062   | Patient094A  |
| 19360 | Patient062   | Patient094B  |
| 19360 | Patient062   | Patient094C  |
| 19360 | Patient066B  | Patient081A1 |
| 19360 | Patient066B  | Patient081D  |
| 19360 | Patient135   | Patient222C  |
| 19361 | Patient053A2 | Patient066B  |
| 19362 | Patient034A  | Patient062   |
| 19362 | Patient045D  | Patient135   |

|       |              |              |
|-------|--------------|--------------|
| 19362 | Patient053B  | Patient066B  |
| 19362 | Patient056   | Patient133   |
| 19362 | Patient062   | Patient183B  |
| 19362 | Patient066B  | Patient081F  |
| 19363 | Patient056   | Patient086B  |
| 19363 | Patient062   | Patient093A  |
| 19363 | Patient066B  | Patient133   |
| 19364 | Patient005   | Patient086A  |
| 19364 | Patient005   | Patient086E  |
| 19364 | Patient081B  | Patient091B  |
| 19365 | Patient031   | Patient091B  |
| 19365 | Patient034E  | Patient062   |
| 19365 | Patient062   | Patient114   |
| 19366 | Patient062   | Patient123A  |
| 19367 | Patient034D  | Patient062   |
| 19367 | Patient062   | Patient183E  |
| 19367 | Patient066B  | Patient141F  |
| 19367 | Patient081C  | Patient091B  |
| 19367 | Patient135   | Patient263A  |
| 19368 | Patient005   | Patient053C  |
| 19368 | Patient005   | Patient086B  |
| 19368 | Patient062   | Patient183C  |
| 19368 | Patient141G  | Patient201C  |
| 19369 | Patient005   | Patient141F  |
| 19369 | Patient056   | Patient167   |
| 19370 | Patient056   | Patient173A  |
| 19370 | Patient056   | Patient176   |
| 19370 | Patient081E  | Patient091B  |
| 19371 | Patient053C  | Patient091B  |
| 19371 | Patient056   | Patient230G  |
| 19371 | Patient062   | Patient093C  |
| 19371 | Patient062   | Patient183A  |
| 19371 | Patient066B  | Patient167   |
| 19371 | Patient091B  | Patient141F  |
| 19372 | Patient005   | Patient053A2 |
| 19372 | Patient034B  | Patient062   |
| 19372 | Patient056   | Patient075   |
| 19372 | Patient056   | Patient141A  |
| 19372 | Patient056   | Patient230C  |
| 19373 | Patient005   | Patient053B  |
| 19373 | Patient091B  | Patient133   |
| 19374 | Patient056   | Patient141C  |
| 19374 | Patient056   | Patient141D  |
| 19374 | Patient066B  | Patient230C  |
| 19374 | Patient081A1 | Patient091B  |
| 19374 | Patient081A2 | Patient091B  |
| 19374 | Patient081D  | Patient091B  |
| 19374 | Patient081F  | Patient091B  |
| 19374 | Patient141G  | Patient201D  |
| 19375 | Patient053A2 | Patient091B  |

|       |             |             |
|-------|-------------|-------------|
| 19375 | Patient056  | Patient141B |
| 19375 | Patient062  | Patient123C |
| 19375 | Patient062  | Patient164  |
| 19375 | Patient062  | Patient193  |
| 19375 | Patient062  | Patient220B |
| 19376 | Patient005  | Patient133  |
| 19376 | Patient005  | Patient230C |
| 19376 | Patient005  | Patient241  |
| 19376 | Patient053B | Patient091B |
| 19376 | Patient091B | Patient167  |
| 19377 | Patient056  | Patient194  |
| 19377 | Patient062  | Patient123B |
| 19377 | Patient066B | Patient173B |
| 19377 | Patient091B | Patient230C |
| 19378 | Patient005  | Patient176  |
| 19378 | Patient066B | Patient230G |
| 19379 | Patient091B | Patient173B |
| 19380 | Patient056  | Patient121B |
| 19380 | Patient056  | Patient161B |
| 19380 | Patient062  | Patient092G |
| 19380 | Patient062  | Patient092H |
| 19380 | Patient062  | Patient196F |
| 19380 | Patient066B | Patient164  |
| 19381 | Patient005  | Patient167  |
| 19381 | Patient005  | Patient230G |
| 19381 | Patient056  | Patient145B |
| 19381 | Patient062  | Patient263A |
| 19381 | Patient066B | Patient251  |
| 19382 | Patient007A | Patient062  |
| 19382 | Patient026E | Patient056  |
| 19382 | Patient062  | Patient100B |
| 19382 | Patient066A | Patient135  |
| 19382 | Patient091B | Patient230G |
| 19382 | Patient201C | Patient220B |
| 19383 | Patient005  | Patient258E |
| 19383 | Patient007B | Patient062  |
| 19383 | Patient026D | Patient056  |
| 19383 | Patient062  | Patient123D |
| 19383 | Patient066B | Patient141D |
| 19383 | Patient201C | Patient261G |
| 19385 | Patient032E | Patient056  |
| 19385 | Patient056  | Patient230A |
| 19385 | Patient056  | Patient261E |
| 19386 | Patient091B | Patient164  |
| 19386 | Patient201D | Patient220B |
| 19387 | Patient066B | Patient121A |
| 19388 | Patient032C | Patient056  |
| 19388 | Patient056  | Patient145C |
| 19388 | Patient056  | Patient261A |
| 19388 | Patient066B | Patient141A |

|       |             |             |
|-------|-------------|-------------|
| 19388 | Patient066B | Patient145B |
| 19388 | Patient091B | Patient141D |
| 19389 | Patient031  | Patient201C |
| 19389 | Patient056  | Patient150C |
| 19389 | Patient081B | Patient201C |
| 19389 | Patient201D | Patient261G |
| 19390 | Patient005  | Patient141D |
| 19390 | Patient026E | Patient062  |
| 19390 | Patient056  | Patient230E |
| 19390 | Patient066B | Patient121B |
| 19390 | Patient066B | Patient261E |
| 19390 | Patient091B | Patient145B |
| 19391 | Patient005  | Patient145B |
| 19391 | Patient062  | Patient093B |
| 19391 | Patient062  | Patient217A |
| 19391 | Patient066B | Patient161B |
| 19391 | Patient081C | Patient201C |
| 19391 | Patient091B | Patient141A |
| 19392 | Patient005  | Patient261E |
| 19392 | Patient026D | Patient062  |
| 19392 | Patient032B | Patient056  |
| 19392 | Patient056  | Patient121A |
| 19392 | Patient091B | Patient161B |
| 19393 | Patient031  | Patient201D |
| 19393 | Patient032E | Patient066B |
| 19393 | Patient066B | Patient141C |
| 19393 | Patient066B | Patient207  |
| 19393 | Patient091B | Patient121A |
| 19393 | Patient091B | Patient261E |
| 19394 | Patient056  | Patient230D |
| 19394 | Patient056  | Patient230F |
| 19394 | Patient062  | Patient217C |
| 19394 | Patient062  | Patient222C |
| 19394 | Patient066B | Patient145C |
| 19394 | Patient066B | Patient261A |
| 19394 | Patient081B | Patient201D |
| 19394 | Patient091B | Patient121B |
| 19395 | Patient056  | Patient173B |
| 19395 | Patient062  | Patient217H |
| 19395 | Patient062  | Patient217I |
| 19395 | Patient066B | Patient141B |
| 19395 | Patient091B | Patient141C |
| 19395 | Patient091B | Patient150C |
| 19396 | Patient005  | Patient032E |
| 19396 | Patient032C | Patient066B |
| 19396 | Patient056  | Patient261B |
| 19396 | Patient062  | Patient217D |
| 19396 | Patient062  | Patient217E |
| 19396 | Patient062  | Patient217F |
| 19396 | Patient081C | Patient201D |

|       |              |             |
|-------|--------------|-------------|
| 19396 | Patient081E  | Patient201C |
| 19396 | Patient091B  | Patient145C |
| 19396 | Patient201C  | Patient202  |
| 19397 | Patient056   | Patient145A |
| 19397 | Patient056   | Patient150A |
| 19397 | Patient056   | Patient261C |
| 19397 | Patient062   | Patient094D |
| 19397 | Patient062   | Patient217B |
| 19397 | Patient066B  | Patient150C |
| 19397 | Patient091B  | Patient141B |
| 19397 | Patient091B  | Patient261A |
| 19397 | Patient128   | Patient201C |
| 19397 | Patient141F  | Patient201C |
| 19398 | Patient005   | Patient220B |
| 19398 | Patient026C  | Patient062  |
| 19398 | Patient032E  | Patient091B |
| 19398 | Patient081D  | Patient201C |
| 19399 | Patient005   | Patient032C |
| 19399 | Patient005   | Patient261A |
| 19399 | Patient032A  | Patient056  |
| 19399 | Patient032B  | Patient066B |
| 19399 | Patient056   | Patient261D |
| 19399 | Patient062   | Patient217J |
| 19399 | Patient081A1 | Patient201C |
| 19399 | Patient081A2 | Patient201C |
| 19399 | Patient081F  | Patient201C |
| 19399 | Patient201D  | Patient202  |
| 19400 | Patient005   | Patient192D |
| 19400 | Patient026E  | Patient066B |
| 19400 | Patient034A  | Patient056  |
| 19400 | Patient128   | Patient201D |
| 19401 | Patient026D  | Patient066B |
| 19401 | Patient026E  | Patient091B |
| 19401 | Patient032B  | Patient091B |
| 19401 | Patient032C  | Patient091B |
| 19401 | Patient056   | Patient181A |
| 19401 | Patient056   | Patient181B |
| 19401 | Patient081E  | Patient201D |
| 19402 | Patient005   | Patient145C |
| 19402 | Patient007A  | Patient056  |
| 19402 | Patient066B  | Patient261C |
| 19403 | Patient026D  | Patient091B |
| 19403 | Patient066B  | Patient261B |
| 19403 | Patient081D  | Patient201D |
| 19403 | Patient141F  | Patient201D |
| 19404 | Patient034C  | Patient056  |
| 19404 | Patient034E  | Patient056  |
| 19404 | Patient062   | Patient094E |
| 19404 | Patient066B  | Patient230A |
| 19404 | Patient081A2 | Patient201D |



|       |              |             |
|-------|--------------|-------------|
| 19404 | Patient081F  | Patient201D |
| 19404 | Patient091B  | Patient150A |
| 19405 | Patient034D  | Patient056  |
| 19405 | Patient056   | Patient230B |
| 19405 | Patient066B  | Patient145A |
| 19405 | Patient081A1 | Patient201D |
| 19405 | Patient201C  | Patient230C |
| 19406 | Patient005   | Patient032B |
| 19406 | Patient005   | Patient261C |
| 19406 | Patient007B  | Patient056  |
| 19406 | Patient056   | Patient150B |
| 19406 | Patient066B  | Patient261D |
| 19406 | Patient091B  | Patient230A |
| 19406 | Patient091B  | Patient261B |
| 19406 | Patient133   | Patient201C |
| 19406 | Patient141A  | Patient201C |
| 19407 | Patient056   | Patient103C |
| 19407 | Patient056   | Patient235F |
| 19407 | Patient062   | Patient104B |
| 19407 | Patient091B  | Patient145A |
| 19407 | Patient091B  | Patient261C |
| 19408 | Patient032A  | Patient066B |
| 19408 | Patient056   | Patient066E |
| 19408 | Patient056   | Patient066F |
| 19408 | Patient066B  | Patient146  |
| 19408 | Patient066B  | Patient150A |
| 19408 | Patient066B  | Patient230E |
| 19408 | Patient141D  | Patient201C |
| 19409 | Patient034B  | Patient056  |
| 19409 | Patient056   | Patient066D |
| 19409 | Patient056   | Patient213A |
| 19409 | Patient056   | Patient235E |
| 19409 | Patient062   | Patient177  |
| 19409 | Patient167   | Patient201C |
| 19409 | Patient201C  | Patient230G |
| 19410 | Patient005   | Patient261B |
| 19410 | Patient026A  | Patient056  |
| 19410 | Patient034A  | Patient066B |
| 19410 | Patient034C  | Patient066B |
| 19410 | Patient054   | Patient062  |
| 19410 | Patient056   | Patient235C |
| 19410 | Patient062   | Patient092A |
| 19410 | Patient062   | Patient204  |
| 19410 | Patient091B  | Patient230E |
| 19410 | Patient091B  | Patient261D |
| 19410 | Patient141C  | Patient201C |
| 19410 | Patient201D  | Patient230C |
| 19411 | Patient026F  | Patient056  |
| 19411 | Patient053C  | Patient201C |
| 19411 | Patient056   | Patient235B |

|       |              |             |
|-------|--------------|-------------|
| 19411 | Patient062   | Patient104A |
| 19411 | Patient062   | Patient247D |
| 19411 | Patient066B  | Patient230D |
| 19411 | Patient133   | Patient201D |
| 19411 | Patient141A  | Patient201D |
| 19412 | Patient005   | Patient261D |
| 19412 | Patient034E  | Patient066B |
| 19412 | Patient062   | Patient180  |
| 19412 | Patient066B  | Patient230F |
| 19412 | Patient091B  | Patient183A |
| 19412 | Patient167   | Patient201D |
| 19413 | Patient005   | Patient022B |
| 19413 | Patient005   | Patient145A |
| 19413 | Patient026B  | Patient056  |
| 19413 | Patient032A  | Patient091B |
| 19413 | Patient062   | Patient092E |
| 19413 | Patient091B  | Patient146  |
| 19413 | Patient141D  | Patient201D |
| 19414 | Patient005   | Patient217A |
| 19414 | Patient034D  | Patient066B |
| 19414 | Patient053A2 | Patient201C |
| 19414 | Patient062   | Patient213B |
| 19414 | Patient091B  | Patient230D |
| 19414 | Patient141B  | Patient201C |
| 19415 | Patient005   | Patient032A |
| 19415 | Patient034A  | Patient091B |
| 19415 | Patient034C  | Patient091B |
| 19415 | Patient045B  | Patient056  |
| 19415 | Patient053B  | Patient201C |
| 19415 | Patient056   | Patient074B |
| 19415 | Patient056   | Patient123A |
| 19415 | Patient062   | Patient092B |
| 19415 | Patient201D  | Patient230G |
| 19416 | Patient005   | Patient034A |
| 19416 | Patient005   | Patient235F |
| 19416 | Patient038   | Patient135  |
| 19416 | Patient045A  | Patient056  |
| 19416 | Patient053C  | Patient201D |
| 19416 | Patient091B  | Patient230F |
| 19416 | Patient141C  | Patient201D |
| 19417 | Patient005   | Patient034C |
| 19417 | Patient034E  | Patient091B |
| 19417 | Patient045C  | Patient056  |
| 19417 | Patient062   | Patient157  |
| 19417 | Patient062   | Patient192A |
| 19417 | Patient062   | Patient192C |
| 19417 | Patient066B  | Patient066F |
| 19417 | Patient066B  | Patient150B |
| 19417 | Patient201C  | Patient261E |
| 19418 | Patient005   | Patient235E |

|       |              |             |
|-------|--------------|-------------|
| 19418 | Patient034B  | Patient066B |
| 19418 | Patient056   | Patient074D |
| 19418 | Patient056   | Patient103B |
| 19418 | Patient056   | Patient123C |
| 19418 | Patient056   | Patient183D |
| 19418 | Patient056   | Patient224A |
| 19418 | Patient062   | Patient066E |
| 19418 | Patient062   | Patient066F |
| 19418 | Patient066B  | Patient066E |
| 19418 | Patient091B  | Patient150B |
| 19418 | Patient164   | Patient201C |
| 19419 | Patient005   | Patient034E |
| 19419 | Patient005   | Patient075  |
| 19419 | Patient034D  | Patient091B |
| 19419 | Patient053A2 | Patient201D |
| 19419 | Patient066B  | Patient123A |
| 19419 | Patient091B  | Patient206  |
| 19419 | Patient145B  | Patient201C |
| 19420 | Patient005   | Patient026C |
| 19420 | Patient005   | Patient183A |
| 19420 | Patient053B  | Patient201D |
| 19420 | Patient056   | Patient074A |
| 19420 | Patient056   | Patient074C |
| 19420 | Patient066B  | Patient066D |
| 19420 | Patient066F  | Patient091B |
| 19420 | Patient141B  | Patient201D |
| 19420 | Patient146   | Patient201C |
| 19421 | Patient005   | Patient034D |
| 19421 | Patient005   | Patient183D |
| 19421 | Patient045A  | Patient066B |
| 19421 | Patient056   | Patient123B |
| 19421 | Patient056   | Patient183A |
| 19421 | Patient056   | Patient183E |
| 19421 | Patient062   | Patient066D |
| 19421 | Patient062   | Patient192B |
| 19421 | Patient062   | Patient246A |
| 19421 | Patient066E  | Patient091B |
| 19422 | Patient005   | Patient177  |
| 19422 | Patient005   | Patient217B |
| 19422 | Patient005   | Patient217E |
| 19422 | Patient005   | Patient217F |
| 19422 | Patient005   | Patient217I |
| 19422 | Patient045B  | Patient066B |
| 19422 | Patient056   | Patient123D |
| 19422 | Patient056   | Patient183C |
| 19422 | Patient062   | Patient103A |
| 19422 | Patient062   | Patient210  |
| 19422 | Patient066B  | Patient123C |
| 19422 | Patient161B  | Patient201C |
| 19422 | Patient164   | Patient201D |

|       |             |             |
|-------|-------------|-------------|
| 19422 | Patient201D | Patient261E |
| 19423 | Patient005  | Patient217D |
| 19423 | Patient032B | Patient201C |
| 19423 | Patient032E | Patient201C |
| 19423 | Patient034B | Patient091B |
| 19423 | Patient056  | Patient103A |
| 19423 | Patient062  | Patient192E |
| 19423 | Patient066D | Patient091B |
| 19424 | Patient005  | Patient183C |
| 19424 | Patient005  | Patient183E |
| 19424 | Patient005  | Patient217C |
| 19424 | Patient005  | Patient217H |
| 19424 | Patient045C | Patient066B |
| 19424 | Patient056  | Patient183B |
| 19424 | Patient056  | Patient224B |
| 19424 | Patient062  | Patient126E |
| 19424 | Patient066B | Patient123D |
| 19424 | Patient066B | Patient230B |
| 19424 | Patient091B | Patient123A |
| 19424 | Patient091B | Patient202  |
| 19424 | Patient145B | Patient201D |
| 19425 | Patient005  | Patient034B |
| 19425 | Patient005  | Patient123A |
| 19425 | Patient062  | Patient192F |
| 19425 | Patient066B | Patient242  |
| 19426 | Patient005  | Patient183B |
| 19426 | Patient026F | Patient066B |
| 19426 | Patient032C | Patient201C |
| 19426 | Patient056  | Patient126C |
| 19426 | Patient066B | Patient123B |
| 19426 | Patient066B | Patient183A |
| 19426 | Patient091B | Patient230B |
| 19426 | Patient146  | Patient201D |
| 19427 | Patient056  | Patient177  |
| 19427 | Patient062  | Patient099E |
| 19427 | Patient066B | Patient183D |
| 19427 | Patient091B | Patient123C |
| 19427 | Patient091B | Patient183D |
| 19427 | Patient161B | Patient201D |
| 19428 | Patient005  | Patient123C |
| 19428 | Patient005  | Patient217J |
| 19428 | Patient026A | Patient066B |
| 19428 | Patient032B | Patient201D |
| 19428 | Patient032E | Patient201D |
| 19428 | Patient062  | Patient247E |
| 19428 | Patient066B | Patient092H |
| 19428 | Patient066B | Patient176  |
| 19428 | Patient150C | Patient201C |
| 19429 | Patient005  | Patient103A |
| 19429 | Patient026F | Patient091B |

|       |             |             |
|-------|-------------|-------------|
| 19429 | Patient045A | Patient091B |
| 19429 | Patient056  | Patient126A |
| 19429 | Patient062  | Patient236B |
| 19429 | Patient062  | Patient247A |
| 19429 | Patient066B | Patient092G |
| 19430 | Patient026A | Patient091B |
| 19430 | Patient045B | Patient091B |
| 19430 | Patient062  | Patient235E |
| 19430 | Patient062  | Patient247B |
| 19430 | Patient066B | Patient183C |
| 19430 | Patient066B | Patient183E |
| 19430 | Patient091B | Patient183C |
| 19430 | Patient091B | Patient183E |
| 19430 | Patient091B | Patient242  |
| 19430 | Patient201C | Patient230A |
| 19430 | Patient201C | Patient261A |
| 19430 | Patient201C | Patient261C |
| 19431 | Patient005  | Patient123B |
| 19431 | Patient026B | Patient066B |
| 19431 | Patient032C | Patient201D |
| 19431 | Patient056  | Patient074E |
| 19431 | Patient056  | Patient192A |
| 19431 | Patient056  | Patient195  |
| 19431 | Patient062  | Patient192D |
| 19431 | Patient062  | Patient247C |
| 19431 | Patient066B | Patient192A |
| 19431 | Patient091B | Patient092H |
| 19431 | Patient091B | Patient123B |
| 19431 | Patient091B | Patient123D |
| 19431 | Patient145C | Patient201C |
| 19431 | Patient201C | Patient242  |
| 19432 | Patient005  | Patient081C |
| 19432 | Patient005  | Patient092H |
| 19432 | Patient005  | Patient123D |
| 19432 | Patient032A | Patient201C |
| 19432 | Patient045C | Patient091B |
| 19432 | Patient066B | Patient183B |
| 19432 | Patient091B | Patient092G |
| 19432 | Patient173B | Patient201C |
| 19433 | Patient005  | Patient081B |
| 19433 | Patient005  | Patient092G |
| 19433 | Patient005  | Patient194  |
| 19433 | Patient034C | Patient201C |
| 19433 | Patient062  | Patient235F |
| 19433 | Patient150C | Patient201D |
| 19433 | Patient201D | Patient242  |
| 19434 | Patient026B | Patient091B |
| 19434 | Patient034A | Patient201C |
| 19434 | Patient091B | Patient183B |
| 19434 | Patient121B | Patient201C |

|       |             |              |
|-------|-------------|--------------|
| 19434 | Patient135  | Patient204   |
| 19435 | Patient062  | Patient232B  |
| 19435 | Patient091B | Patient176   |
| 19435 | Patient173B | Patient201D  |
| 19435 | Patient201D | Patient261A  |
| 19436 | Patient005  | Patient235A  |
| 19436 | Patient034E | Patient201C  |
| 19436 | Patient056  | Patient092H  |
| 19436 | Patient145C | Patient201D  |
| 19436 | Patient201D | Patient230A  |
| 19436 | Patient201D | Patient261C  |
| 19437 | Patient032A | Patient201D  |
| 19437 | Patient056  | Patient092G  |
| 19437 | Patient056  | Patient192C  |
| 19438 | Patient033  | Patient062   |
| 19438 | Patient034A | Patient201D  |
| 19438 | Patient034C | Patient201D  |
| 19438 | Patient034D | Patient201C  |
| 19438 | Patient045A | Patient062   |
| 19438 | Patient045C | Patient062   |
| 19438 | Patient056  | Patient192B  |
| 19438 | Patient062  | Patient230D  |
| 19438 | Patient066B | Patient192B  |
| 19438 | Patient072  | Patient191   |
| 19438 | Patient091B | Patient128   |
| 19439 | Patient005  | Patient081D  |
| 19439 | Patient005  | Patient081E  |
| 19439 | Patient062  | Patient141A  |
| 19439 | Patient062  | Patient232C  |
| 19439 | Patient062  | Patient236A  |
| 19439 | Patient066B | Patient126C  |
| 19439 | Patient121B | Patient201D  |
| 19439 | Patient150A | Patient201C  |
| 19439 | Patient201C | Patient261B  |
| 19440 | Patient062  | Patient189A  |
| 19440 | Patient062  | Patient189B  |
| 19440 | Patient062  | Patient232D  |
| 19440 | Patient062  | Patient232E  |
| 19440 | Patient091B | Patient192A  |
| 19440 | Patient121A | Patient201C  |
| 19441 | Patient034E | Patient201D  |
| 19441 | Patient045B | Patient062   |
| 19441 | Patient062  | Patient220A  |
| 19441 | Patient062  | Patient232A  |
| 19441 | Patient062  | Patient252D  |
| 19442 | Patient005  | Patient081A1 |
| 19442 | Patient005  | Patient081A2 |
| 19442 | Patient005  | Patient081F  |
| 19442 | Patient034B | Patient201C  |
| 19442 | Patient062  | Patient189E  |

|       |             |             |
|-------|-------------|-------------|
| 19442 | Patient062  | Patient238  |
| 19442 | Patient066B | Patient192C |
| 19442 | Patient145A | Patient201C |
| 19442 | Patient201C | Patient261D |
| 19443 | Patient034D | Patient201D |
| 19443 | Patient056  | Patient192E |
| 19443 | Patient056  | Patient192F |
| 19443 | Patient062  | Patient120A |
| 19443 | Patient062  | Patient141B |
| 19443 | Patient091B | Patient126C |
| 19444 | Patient062  | Patient196A |
| 19444 | Patient062  | Patient201B |
| 19444 | Patient062  | Patient230A |
| 19444 | Patient121A | Patient201D |
| 19444 | Patient150A | Patient201D |
| 19445 | Patient062  | Patient265  |
| 19445 | Patient120A | Patient201C |
| 19445 | Patient176  | Patient201C |
| 19445 | Patient201D | Patient261B |
| 19446 | Patient056  | Patient092E |
| 19446 | Patient062  | Patient141C |
| 19446 | Patient062  | Patient218A |
| 19446 | Patient062  | Patient230E |
| 19446 | Patient066B | Patient192E |
| 19446 | Patient066B | Patient192F |
| 19446 | Patient066B | Patient235F |
| 19446 | Patient120A | Patient201D |
| 19447 | Patient034B | Patient201D |
| 19447 | Patient062  | Patient069  |
| 19447 | Patient062  | Patient205  |
| 19447 | Patient145A | Patient201D |
| 19448 | Patient026D | Patient201C |
| 19448 | Patient026E | Patient201C |
| 19448 | Patient026F | Patient062  |
| 19448 | Patient055  | Patient254  |
| 19448 | Patient062  | Patient222B |
| 19448 | Patient066B | Patient235E |
| 19448 | Patient091B | Patient192B |
| 19448 | Patient150B | Patient201C |
| 19448 | Patient201C | Patient230D |
| 19448 | Patient201D | Patient261D |
| 19449 | Patient062  | Patient196E |
| 19450 | Patient056  | Patient103E |
| 19451 | Patient062  | Patient099B |
| 19451 | Patient062  | Patient171  |
| 19451 | Patient062  | Patient201E |
| 19451 | Patient091B | Patient192C |
| 19451 | Patient176  | Patient201D |
| 19451 | Patient201C | Patient230B |
| 19452 | Patient056  | Patient103D |

|       |             |             |
|-------|-------------|-------------|
| 19452 | Patient062  | Patient159  |
| 19452 | Patient062  | Patient201A |
| 19452 | Patient062  | Patient218B |
| 19452 | Patient091B | Patient235F |
| 19453 | Patient026B | Patient062  |
| 19453 | Patient026D | Patient201D |
| 19453 | Patient026E | Patient201D |
| 19453 | Patient062  | Patient099A |
| 19453 | Patient062  | Patient150A |
| 19453 | Patient062  | Patient196B |
| 19453 | Patient062  | Patient196C |
| 19453 | Patient062  | Patient246C |
| 19453 | Patient066B | Patient092E |
| 19453 | Patient150B | Patient201D |
| 19453 | Patient201D | Patient230D |
| 19454 | Patient005  | Patient120A |
| 19454 | Patient091B | Patient235E |
| 19454 | Patient201C | Patient230F |
| 19455 | Patient005  | Patient192A |
| 19455 | Patient026A | Patient062  |
| 19455 | Patient062  | Patient103D |
| 19455 | Patient062  | Patient127A |
| 19456 | Patient007A | Patient066B |
| 19456 | Patient056  | Patient092A |
| 19456 | Patient062  | Patient246B |
| 19456 | Patient062  | Patient263B |
| 19456 | Patient066B | Patient235C |
| 19456 | Patient091B | Patient092E |
| 19456 | Patient091B | Patient192E |
| 19457 | Patient005  | Patient092E |
| 19457 | Patient005  | Patient103E |
| 19457 | Patient007B | Patient066B |
| 19457 | Patient056  | Patient120B |
| 19457 | Patient062  | Patient161B |
| 19457 | Patient062  | Patient230F |
| 19457 | Patient066B | Patient235B |
| 19457 | Patient091B | Patient192F |
| 19457 | Patient201C | Patient230E |
| 19457 | Patient201D | Patient230B |
| 19458 | Patient045A | Patient201C |
| 19458 | Patient062  | Patient099D |
| 19458 | Patient066B | Patient194  |
| 19458 | Patient126C | Patient201C |
| 19458 | Patient201D | Patient230F |
| 19459 | Patient005  | Patient103D |
| 19459 | Patient045B | Patient201C |
| 19459 | Patient056  | Patient120C |
| 19459 | Patient062  | Patient099C |
| 19459 | Patient066B | Patient092B |
| 19459 | Patient126C | Patient201D |



|       |             |             |
|-------|-------------|-------------|
| 19460 | Patient062  | Patient103E |
| 19460 | Patient091B | Patient235C |
| 19460 | Patient093D | Patient135  |
| 19461 | Patient005  | Patient141A |
| 19461 | Patient005  | Patient242  |
| 19461 | Patient045C | Patient201C |
| 19461 | Patient062  | Patient127B |
| 19461 | Patient062  | Patient187  |
| 19461 | Patient062  | Patient196D |
| 19461 | Patient062  | Patient222A |
| 19461 | Patient091B | Patient235B |
| 19461 | Patient123A | Patient201C |
| 19462 | Patient005  | Patient173A |
| 19462 | Patient005  | Patient192B |
| 19462 | Patient026A | Patient201C |
| 19462 | Patient026F | Patient201C |
| 19462 | Patient045A | Patient201D |
| 19462 | Patient091B | Patient092B |
| 19462 | Patient201D | Patient230E |
| 19463 | Patient005  | Patient092B |
| 19463 | Patient005  | Patient173B |
| 19463 | Patient045B | Patient201D |
| 19463 | Patient062  | Patient150C |
| 19463 | Patient062  | Patient222E |
| 19463 | Patient062  | Patient246D |
| 19463 | Patient135  | Patient210  |
| 19464 | Patient062  | Patient184  |
| 19464 | Patient066B | Patient092A |
| 19464 | Patient123C | Patient201C |
| 19465 | Patient005  | Patient141C |
| 19465 | Patient005  | Patient192C |
| 19465 | Patient045C | Patient201D |
| 19465 | Patient054  | Patient135  |
| 19465 | Patient056  | Patient120D |
| 19465 | Patient062  | Patient100A |
| 19465 | Patient062  | Patient126C |
| 19465 | Patient062  | Patient230B |
| 19465 | Patient066F | Patient201C |
| 19465 | Patient123A | Patient201D |
| 19466 | Patient007A | Patient201C |
| 19466 | Patient026A | Patient201D |
| 19466 | Patient026B | Patient201C |
| 19466 | Patient026F | Patient201D |
| 19466 | Patient066E | Patient201C |
| 19466 | Patient104B | Patient135  |
| 19466 | Patient135  | Patient205  |
| 19467 | Patient005  | Patient141B |
| 19467 | Patient062  | Patient149B |
| 19467 | Patient062  | Patient150B |
| 19468 | Patient005  | Patient026E |

|       |             |             |
|-------|-------------|-------------|
| 19468 | Patient005  | Patient092A |
| 19468 | Patient007A | Patient091B |
| 19468 | Patient056  | Patient092B |
| 19468 | Patient062  | Patient246E |
| 19468 | Patient091B | Patient092A |
| 19468 | Patient093C | Patient135  |
| 19468 | Patient123B | Patient201C |
| 19468 | Patient123C | Patient201D |
| 19469 | Patient005  | Patient026D |
| 19469 | Patient007B | Patient201C |
| 19469 | Patient062  | Patient222D |
| 19469 | Patient066D | Patient201C |
| 19469 | Patient123D | Patient201C |
| 19470 | Patient005  | Patient181B |
| 19470 | Patient005  | Patient192E |
| 19470 | Patient005  | Patient192F |
| 19470 | Patient026B | Patient201D |
| 19470 | Patient045D | Patient056  |
| 19470 | Patient062  | Patient222F |
| 19470 | Patient066F | Patient201D |
| 19470 | Patient093B | Patient135  |
| 19471 | Patient066B | Patient173A |
| 19471 | Patient066E | Patient201D |
| 19471 | Patient123B | Patient201D |
| 19471 | Patient173A | Patient201C |
| 19471 | Patient192A | Patient201C |
| 19472 | Patient062  | Patient195  |
| 19472 | Patient091B | Patient173A |
| 19472 | Patient091B | Patient194  |
| 19472 | Patient092H | Patient201C |
| 19473 | Patient007A | Patient201D |
| 19473 | Patient092G | Patient201C |
| 19473 | Patient093A | Patient135  |
| 19473 | Patient093E | Patient135  |
| 19473 | Patient123D | Patient201D |
| 19474 | Patient005  | Patient181A |
| 19474 | Patient066D | Patient201D |
| 19474 | Patient094B | Patient135  |
| 19474 | Patient094C | Patient135  |
| 19475 | Patient005  | Patient230A |
| 19475 | Patient066B | Patient120A |
| 19475 | Patient173A | Patient201D |
| 19475 | Patient192A | Patient201D |
| 19476 | Patient005  | Patient230E |
| 19476 | Patient007B | Patient091B |
| 19476 | Patient062  | Patient121A |
| 19476 | Patient092H | Patient201D |
| 19477 | Patient005  | Patient045A |
| 19477 | Patient007B | Patient201D |
| 19477 | Patient062  | Patient181A |

|       |             |             |
|-------|-------------|-------------|
| 19477 | Patient092G | Patient201D |
| 19477 | Patient094A | Patient135  |
| 19478 | Patient005  | Patient045B |
| 19478 | Patient005  | Patient091A |
| 19478 | Patient066B | Patient075  |
| 19478 | Patient066B | Patient195  |
| 19478 | Patient091B | Patient120A |
| 19478 | Patient192B | Patient201C |
| 19479 | Patient005  | Patient121A |
| 19479 | Patient005  | Patient161B |
| 19479 | Patient005  | Patient230D |
| 19479 | Patient022B | Patient091B |
| 19479 | Patient028  | Patient056  |
| 19479 | Patient045D | Patient062  |
| 19479 | Patient062  | Patient181B |
| 19479 | Patient183A | Patient201C |
| 19480 | Patient005  | Patient045C |
| 19480 | Patient056  | Patient196F |
| 19480 | Patient074B | Patient201C |
| 19480 | Patient075  | Patient091B |
| 19480 | Patient103C | Patient201C |
| 19480 | Patient183D | Patient201C |
| 19480 | Patient192C | Patient201C |
| 19481 | Patient241  | Patient254  |
| 19482 | Patient005  | Patient121B |
| 19482 | Patient062  | Patient121B |
| 19482 | Patient135  | Patient158  |
| 19482 | Patient183A | Patient201D |
| 19482 | Patient192B | Patient201D |
| 19483 | Patient022B | Patient201C |
| 19483 | Patient183C | Patient201C |
| 19483 | Patient183D | Patient201D |
| 19483 | Patient183E | Patient201C |
| 19483 | Patient192C | Patient201D |
| 19484 | Patient005  | Patient230F |
| 19484 | Patient045D | Patient091B |
| 19484 | Patient094D | Patient135  |
| 19484 | Patient192E | Patient201C |
| 19485 | Patient005  | Patient007A |
| 19485 | Patient056  | Patient210  |
| 19485 | Patient074B | Patient201D |
| 19485 | Patient074D | Patient201C |
| 19485 | Patient201C | Patient224A |
| 19486 | Patient029  | Patient062  |
| 19486 | Patient056  | Patient222C |
| 19486 | Patient103B | Patient201C |
| 19486 | Patient103C | Patient201D |
| 19486 | Patient183B | Patient201C |
| 19486 | Patient183C | Patient201D |
| 19486 | Patient183E | Patient201D |

|       |             |             |
|-------|-------------|-------------|
| 19487 | Patient074A | Patient201C |
| 19487 | Patient074C | Patient201C |
| 19487 | Patient192F | Patient201C |
| 19488 | Patient005  | Patient007B |
| 19488 | Patient022B | Patient201D |
| 19488 | Patient062  | Patient235A |
| 19488 | Patient192E | Patient201D |
| 19489 | Patient062  | Patient224B |
| 19489 | Patient094E | Patient135  |
| 19489 | Patient181B | Patient201C |
| 19489 | Patient183B | Patient201D |
| 19490 | Patient056  | Patient263A |
| 19490 | Patient066B | Patient210  |
| 19490 | Patient074D | Patient201D |
| 19490 | Patient103A | Patient201C |
| 19490 | Patient126A | Patient201C |
| 19490 | Patient201D | Patient224A |
| 19491 | Patient103B | Patient201D |
| 19491 | Patient126A | Patient201D |
| 19491 | Patient192F | Patient201D |
| 19492 | Patient005  | Patient126A |
| 19492 | Patient005  | Patient150C |
| 19492 | Patient074A | Patient201D |
| 19492 | Patient074C | Patient201D |
| 19492 | Patient181A | Patient201C |
| 19493 | Patient005  | Patient164  |
| 19493 | Patient091B | Patient195  |
| 19494 | Patient005  | Patient026F |
| 19494 | Patient056  | Patient091A |
| 19494 | Patient062  | Patient173B |
| 19494 | Patient092C | Patient191  |
| 19494 | Patient104A | Patient135  |
| 19494 | Patient201C | Patient224B |
| 19495 | Patient005  | Patient230B |
| 19495 | Patient103A | Patient201D |
| 19495 | Patient181B | Patient201D |
| 19495 | Patient201C | Patient213A |
| 19496 | Patient005  | Patient210  |
| 19496 | Patient066B | Patient128  |
| 19496 | Patient074E | Patient201C |
| 19496 | Patient092E | Patient201C |
| 19497 | Patient005  | Patient026A |
| 19497 | Patient062  | Patient126A |
| 19497 | Patient075  | Patient201C |
| 19498 | Patient005  | Patient103C |
| 19498 | Patient135  | Patient189A |
| 19498 | Patient135  | Patient189B |
| 19498 | Patient181A | Patient201D |
| 19498 | Patient201C | Patient235F |
| 19499 | Patient005  | Patient026B |

|       |             |              |
|-------|-------------|--------------|
| 19499 | Patient201D | Patient213A  |
| 19499 | Patient201D | Patient224B  |
| 19500 | Patient005  | Patient126C  |
| 19500 | Patient066B | Patient206   |
| 19500 | Patient092E | Patient201D  |
| 19500 | Patient100A | Patient135   |
| 19500 | Patient177  | Patient201C  |
| 19500 | Patient201C | Patient235E  |
| 19501 | Patient066B | Patient181B  |
| 19501 | Patient074E | Patient201D  |
| 19501 | Patient091B | Patient181B  |
| 19501 | Patient135  | Patient189E  |
| 19502 | Patient075  | Patient201D  |
| 19502 | Patient201D | Patient235F  |
| 19503 | Patient005  | Patient103B  |
| 19503 | Patient005  | Patient150A  |
| 19503 | Patient091B | Patient210   |
| 19503 | Patient135  | Patient213B  |
| 19504 | Patient005  | Patient224B  |
| 19504 | Patient092B | Patient201C  |
| 19504 | Patient126E | Patient135   |
| 19504 | Patient177  | Patient201D  |
| 19504 | Patient201D | Patient235E  |
| 19505 | Patient066B | Patient181A  |
| 19505 | Patient091B | Patient181A  |
| 19505 | Patient201C | Patient235C  |
| 19507 | Patient146  | Patient254   |
| 19508 | Patient066B | Patient103C  |
| 19508 | Patient092B | Patient201D  |
| 19508 | Patient201D | Patient235C  |
| 19509 | Patient201C | Patient235B  |
| 19510 | Patient066B | Patient213A  |
| 19510 | Patient092A | Patient201C  |
| 19511 | Patient091B | Patient103C  |
| 19512 | Patient005  | Patient150B  |
| 19513 | Patient091B | Patient213A  |
| 19513 | Patient092A | Patient201D  |
| 19513 | Patient126D | Patient135   |
| 19513 | Patient201D | Patient235B  |
| 19514 | Patient005  | Patient066F  |
| 19515 | Patient005  | Patient066E  |
| 19515 | Patient032D | Patient191   |
| 19515 | Patient066B | Patient091A  |
| 19515 | Patient066B | Patient103B  |
| 19515 | Patient091B | Patient224A  |
| 19515 | Patient103E | Patient201C  |
| 19516 | Patient062  | Patient108B1 |
| 19516 | Patient074D | Patient091B  |
| 19516 | Patient135  | Patient236B  |
| 19517 | Patient066B | Patient224A  |

|       |             |              |
|-------|-------------|--------------|
| 19517 | Patient091B | Patient103B  |
| 19517 | Patient103D | Patient201C  |
| 19518 | Patient005  | Patient066D  |
| 19518 | Patient062  | Patient108B2 |
| 19518 | Patient062  | Patient120B  |
| 19518 | Patient066B | Patient103A  |
| 19518 | Patient066B | Patient177   |
| 19518 | Patient074B | Patient091B  |
| 19518 | Patient135  | Patient159   |
| 19518 | Patient242  | Patient254   |
| 19520 | Patient005  | Patient235C  |
| 19520 | Patient062  | Patient120D  |
| 19520 | Patient099E | Patient135   |
| 19520 | Patient135  | Patient247D  |
| 19521 | Patient062  | Patient126D  |
| 19521 | Patient103E | Patient201D  |
| 19521 | Patient135  | Patient196C  |
| 19522 | Patient005  | Patient028   |
| 19522 | Patient005  | Patient038   |
| 19522 | Patient005  | Patient235B  |
| 19522 | Patient062  | Patient097D  |
| 19522 | Patient062  | Patient120C  |
| 19522 | Patient074A | Patient091B  |
| 19522 | Patient074C | Patient091B  |
| 19522 | Patient091B | Patient103A  |
| 19522 | Patient091B | Patient177   |
| 19523 | Patient045D | Patient201C  |
| 19523 | Patient103D | Patient201D  |
| 19523 | Patient135  | Patient201B  |
| 19523 | Patient195  | Patient201C  |
| 19524 | Patient022B | Patient066B  |
| 19525 | Patient045D | Patient201D  |
| 19525 | Patient062  | Patient097C  |
| 19525 | Patient135  | Patient232A  |
| 19525 | Patient135  | Patient232B  |
| 19525 | Patient135  | Patient232C  |
| 19526 | Patient062  | Patient097A  |
| 19526 | Patient066B | Patient126A  |
| 19527 | Patient066B | Patient224B  |
| 19527 | Patient135  | Patient196E  |
| 19527 | Patient135  | Patient232D  |
| 19527 | Patient135  | Patient232E  |
| 19527 | Patient135  | Patient236A  |
| 19528 | Patient005  | Patient224A  |
| 19528 | Patient062  | Patient103B  |
| 19528 | Patient091A | Patient091B  |
| 19528 | Patient195  | Patient201D  |
| 19529 | Patient062  | Patient103C  |
| 19529 | Patient091B | Patient126A  |
| 19529 | Patient091B | Patient224B  |

|       |              |             |
|-------|--------------|-------------|
| 19529 | Patient135   | Patient222D |
| 19530 | Patient062   | Patient097B |
| 19530 | Patient135   | Patient196A |
| 19530 | Patient135   | Patient196B |
| 19530 | Patient135   | Patient196D |
| 19530 | Patient135   | Patient201E |
| 19530 | Patient135   | Patient222E |
| 19530 | Patient135   | Patient252D |
| 19531 | Patient005   | Patient074B |
| 19531 | Patient062   | Patient108A |
| 19531 | Patient062   | Patient173A |
| 19531 | Patient074E  | Patient091B |
| 19531 | Patient135   | Patient201A |
| 19531 | Patient135   | Patient222B |
| 19532 | Patient005   | Patient195  |
| 19532 | Patient038   | Patient056  |
| 19532 | Patient135   | Patient222A |
| 19533 | Patient005   | Patient196F |
| 19533 | Patient056   | Patient066A |
| 19533 | Patient062   | Patient074B |
| 19533 | Patient062   | Patient097E |
| 19533 | Patient062   | Patient109C |
| 19534 | Patient005   | Patient074D |
| 19534 | Patient062   | Patient074A |
| 19534 | Patient062   | Patient109A |
| 19534 | Patient091A  | Patient201C |
| 19535 | Patient135   | Patient220A |
| 19536 | Patient005   | Patient074A |
| 19536 | Patient005   | Patient074C |
| 19536 | Patient062   | Patient074C |
| 19536 | Patient135   | Patient247E |
| 19537 | Patient028   | Patient091B |
| 19537 | Patient135   | Patient246A |
| 19537 | Patient135   | Patient265  |
| 19538 | Patient005   | Patient222C |
| 19538 | Patient062   | Patient224A |
| 19538 | Patient128   | Patient254  |
| 19538 | Patient135   | Patient247A |
| 19539 | Patient054   | Patient056  |
| 19539 | Patient091A  | Patient201D |
| 19539 | Patient108B2 | Patient135  |
| 19540 | Patient062   | Patient074D |
| 19540 | Patient062   | Patient108G |
| 19540 | Patient062   | Patient109B |
| 19540 | Patient135   | Patient157  |
| 19540 | Patient135   | Patient222F |
| 19540 | Patient135   | Patient246C |
| 19541 | Patient062   | Patient108D |
| 19541 | Patient062   | Patient108H |
| 19541 | Patient135   | Patient247C |

|       |              |             |
|-------|--------------|-------------|
| 19542 | Patient005   | Patient263A |
| 19542 | Patient062   | Patient074E |
| 19542 | Patient062   | Patient252B |
| 19543 | Patient062   | Patient109E |
| 19543 | Patient091B  | Patient196F |
| 19543 | Patient108B1 | Patient135  |
| 19543 | Patient127A  | Patient135  |
| 19543 | Patient135   | Patient218A |
| 19544 | Patient056   | Patient189B |
| 19544 | Patient062   | Patient109D |
| 19544 | Patient135   | Patient246B |
| 19545 | Patient005   | Patient074E |
| 19545 | Patient062   | Patient252A |
| 19545 | Patient062   | Patient252F |
| 19545 | Patient099D  | Patient135  |
| 19545 | Patient135   | Patient247B |
| 19546 | Patient062   | Patient108F |
| 19546 | Patient066B  | Patient103E |
| 19546 | Patient091B  | Patient222C |
| 19546 | Patient135   | Patient246D |
| 19547 | Patient091B  | Patient263A |
| 19547 | Patient127B  | Patient135  |
| 19547 | Patient135   | Patient184  |
| 19547 | Patient135   | Patient218B |
| 19548 | Patient023   | Patient135  |
| 19548 | Patient056   | Patient189A |
| 19548 | Patient062   | Patient213A |
| 19548 | Patient066B  | Patient103D |
| 19548 | Patient099A  | Patient135  |
| 19549 | Patient091B  | Patient103E |
| 19549 | Patient099B  | Patient135  |
| 19549 | Patient135   | Patient263B |
| 19550 | Patient005   | Patient066A |
| 19550 | Patient062   | Patient235C |
| 19550 | Patient099C  | Patient135  |
| 19551 | Patient056   | Patient189E |
| 19551 | Patient091B  | Patient103D |
| 19551 | Patient135   | Patient187  |
| 19554 | Patient194   | Patient201C |
| 19555 | Patient005   | Patient120D |
| 19555 | Patient079C  | Patient135  |
| 19555 | Patient108A  | Patient135  |
| 19555 | Patient135   | Patient246E |
| 19556 | Patient005   | Patient213A |
| 19556 | Patient079A1 | Patient135  |
| 19557 | Patient135   | Patient252B |
| 19558 | Patient079A2 | Patient135  |
| 19558 | Patient135   | Patient252A |
| 19559 | Patient062   | Patient235B |
| 19559 | Patient066B  | Patient202  |



|       |             |              |
|-------|-------------|--------------|
| 19559 | Patient079B | Patient135   |
| 19559 | Patient194  | Patient201D  |
| 19560 | Patient005  | Patient120B  |
| 19560 | Patient062  | Patient202   |
| 19560 | Patient135  | Patient149B  |
| 19560 | Patient135  | Patient252F  |
| 19560 | Patient220B | Patient254   |
| 19561 | Patient109A | Patient135   |
| 19562 | Patient005  | Patient120C  |
| 19562 | Patient023  | Patient062   |
| 19562 | Patient108D | Patient135   |
| 19563 | Patient108G | Patient135   |
| 19563 | Patient108H | Patient135   |
| 19564 | Patient097B | Patient135   |
| 19565 | Patient108F | Patient135   |
| 19565 | Patient109C | Patient135   |
| 19566 | Patient007A | Patient254   |
| 19566 | Patient090  | Patient254   |
| 19566 | Patient109B | Patient135   |
| 19566 | Patient120D | Patient201C  |
| 19567 | Patient097A | Patient135   |
| 19567 | Patient131  | Patient135   |
| 19568 | Patient097E | Patient135   |
| 19570 | Patient097D | Patient135   |
| 19570 | Patient109D | Patient135   |
| 19570 | Patient109E | Patient135   |
| 19570 | Patient120B | Patient201C  |
| 19570 | Patient120D | Patient201D  |
| 19571 | Patient007B | Patient254   |
| 19571 | Patient038  | Patient091B  |
| 19571 | Patient056  | Patient158   |
| 19571 | Patient097C | Patient135   |
| 19573 | Patient028  | Patient201C  |
| 19573 | Patient056  | Patient093C  |
| 19573 | Patient120C | Patient201C  |
| 19574 | Patient028  | Patient201D  |
| 19574 | Patient120B | Patient201D  |
| 19575 | Patient033  | Patient254   |
| 19575 | Patient045D | Patient066B  |
| 19577 | Patient120C | Patient201D  |
| 19578 | Patient005  | Patient202   |
| 19578 | Patient075  | Patient254   |
| 19578 | Patient254  | Patient258A1 |
| 19579 | Patient066B | Patient120D  |
| 19579 | Patient092C | Patient254   |
| 19580 | Patient254  | Patient258F  |
| 19581 | Patient062  | Patient131   |
| 19581 | Patient254  | Patient258A2 |
| 19581 | Patient254  | Patient258D  |
| 19582 | Patient091B | Patient120D  |

|       |              |              |
|-------|--------------|--------------|
| 19582 | Patient254   | Patient258B  |
| 19583 | Patient005   | Patient158   |
| 19583 | Patient033   | Patient066B  |
| 19584 | Patient066B  | Patient120B  |
| 19584 | Patient091A  | Patient254   |
| 19584 | Patient254   | Patient258G  |
| 19586 | Patient207   | Patient254   |
| 19587 | Patient056   | Patient094A  |
| 19587 | Patient066B  | Patient120C  |
| 19587 | Patient091B  | Patient120B  |
| 19587 | Patient196F  | Patient201C  |
| 19587 | Patient196F  | Patient201D  |
| 19588 | Patient033   | Patient201C  |
| 19589 | Patient005   | Patient045D  |
| 19589 | Patient021A1 | Patient135   |
| 19589 | Patient091B  | Patient120C  |
| 19590 | Patient021A2 | Patient062   |
| 19590 | Patient201C  | Patient222C  |
| 19591 | Patient021A1 | Patient062   |
| 19591 | Patient021A2 | Patient135   |
| 19591 | Patient056   | Patient189C1 |
| 19591 | Patient062   | Patient079C  |
| 19591 | Patient201D  | Patient222C  |
| 19592 | Patient005   | Patient189B  |
| 19592 | Patient033   | Patient201D  |
| 19593 | Patient056   | Patient093B  |
| 19594 | Patient013   | Patient191   |
| 19594 | Patient062   | Patient079B  |
| 19594 | Patient201C  | Patient263A  |
| 19594 | Patient201D  | Patient263A  |
| 19595 | Patient056   | Patient094D  |
| 19595 | Patient056   | Patient189C2 |
| 19596 | Patient033   | Patient091B  |
| 19596 | Patient062   | Patient079A2 |
| 19596 | Patient066A  | Patient091B  |
| 19597 | Patient062   | Patient079A1 |
| 19597 | Patient092D  | Patient191   |
| 19598 | Patient005   | Patient189A  |
| 19598 | Patient038   | Patient201C  |
| 19598 | Patient066B  | Patient074B  |
| 19598 | Patient133   | Patient254   |
| 19600 | Patient066B  | Patient074D  |
| 19601 | Patient005   | Patient189E  |
| 19602 | Patient056   | Patient094E  |
| 19602 | Patient066B  | Patient074A  |
| 19602 | Patient066B  | Patient074C  |
| 19603 | Patient055   | Patient191   |
| 19604 | Patient056   | Patient213B  |
| 19605 | Patient038   | Patient201D  |
| 19605 | Patient091B  | Patient189B  |

|       |              |              |
|-------|--------------|--------------|
| 19607 | Patient056   | Patient157   |
| 19608 | Patient005   | Patient204   |
| 19608 | Patient031   | Patient254   |
| 19608 | Patient066A  | Patient201C  |
| 19610 | Patient128   | Patient191   |
| 19610 | Patient164   | Patient254   |
| 19611 | Patient066B  | Patient074E  |
| 19612 | Patient056   | Patient100A  |
| 19612 | Patient091B  | Patient189A  |
| 19613 | Patient053A1 | Patient191   |
| 19613 | Patient066A  | Patient201D  |
| 19615 | Patient091B  | Patient189E  |
| 19617 | Patient150C  | Patient254   |
| 19619 | Patient150A  | Patient254   |
| 19620 | Patient026E  | Patient254   |
| 19620 | Patient066B  | Patient158   |
| 19621 | Patient045A  | Patient254   |
| 19621 | Patient056   | Patient104A  |
| 19622 | Patient021A2 | Patient056   |
| 19622 | Patient026D  | Patient254   |
| 19622 | Patient056   | Patient104B  |
| 19622 | Patient176   | Patient254   |
| 19623 | Patient005   | Patient093C  |
| 19623 | Patient021A1 | Patient056   |
| 19623 | Patient251   | Patient254   |
| 19624 | Patient045C  | Patient254   |
| 19625 | Patient056   | Patient126E  |
| 19625 | Patient056   | Patient131   |
| 19627 | Patient056   | Patient079A1 |
| 19628 | Patient005   | Patient054   |
| 19628 | Patient056   | Patient079C  |
| 19629 | Patient045B  | Patient254   |
| 19629 | Patient056   | Patient099E  |
| 19629 | Patient056   | Patient126D  |
| 19629 | Patient056   | Patient220A  |
| 19629 | Patient183A  | Patient254   |
| 19630 | Patient028   | Patient066B  |
| 19630 | Patient056   | Patient079A2 |
| 19630 | Patient056   | Patient108B1 |
| 19630 | Patient056   | Patient232B  |
| 19630 | Patient056   | Patient247D  |
| 19630 | Patient081C  | Patient254   |
| 19631 | Patient056   | Patient108B2 |
| 19631 | Patient056   | Patient159   |
| 19632 | Patient056   | Patient079B  |
| 19632 | Patient056   | Patient108A  |
| 19632 | Patient056   | Patient222B  |
| 19632 | Patient056   | Patient232A  |
| 19632 | Patient056   | Patient252B  |
| 19632 | Patient167   | Patient254   |

|       |             |              |
|-------|-------------|--------------|
| 19632 | Patient191  | Patient258A1 |
| 19633 | Patient056  | Patient097D  |
| 19633 | Patient056  | Patient196E  |
| 19633 | Patient056  | Patient236B  |
| 19633 | Patient066B | Patient196F  |
| 19634 | Patient005  | Patient093D  |
| 19634 | Patient056  | Patient097A  |
| 19634 | Patient056  | Patient108G  |
| 19634 | Patient056  | Patient232C  |
| 19634 | Patient091B | Patient158   |
| 19634 | Patient158  | Patient201C  |
| 19635 | Patient056  | Patient196A  |
| 19635 | Patient056  | Patient196B  |
| 19635 | Patient056  | Patient232E  |
| 19635 | Patient066B | Patient222C  |
| 19635 | Patient091B | Patient093C  |
| 19636 | Patient056  | Patient109A  |
| 19636 | Patient056  | Patient196C  |
| 19636 | Patient056  | Patient201E  |
| 19637 | Patient005  | Patient093A  |
| 19637 | Patient056  | Patient097C  |
| 19637 | Patient056  | Patient252D  |
| 19637 | Patient146  | Patient191   |
| 19637 | Patient183D | Patient254   |
| 19638 | Patient056  | Patient201A  |
| 19638 | Patient056  | Patient201B  |
| 19638 | Patient056  | Patient232D  |
| 19638 | Patient081D | Patient254   |
| 19638 | Patient191  | Patient258D  |
| 19638 | Patient191  | Patient258F  |
| 19639 | Patient056  | Patient097B  |
| 19639 | Patient056  | Patient108H  |
| 19639 | Patient056  | Patient252A  |
| 19639 | Patient066A | Patient066B  |
| 19639 | Patient191  | Patient258A2 |
| 19639 | Patient191  | Patient258B  |
| 19640 | Patient005  | Patient093B  |
| 19640 | Patient005  | Patient094C  |
| 19640 | Patient056  | Patient252F  |
| 19640 | Patient056  | Patient265   |
| 19640 | Patient066B | Patient263A  |
| 19640 | Patient150B | Patient254   |
| 19640 | Patient201C | Patient210   |
| 19641 | Patient056  | Patient108F  |
| 19641 | Patient056  | Patient247C  |
| 19641 | Patient158  | Patient201D  |
| 19642 | Patient056  | Patient097E  |
| 19642 | Patient056  | Patient247B  |
| 19642 | Patient056  | Patient247E  |
| 19642 | Patient191  | Patient258G  |

|       |             |              |
|-------|-------------|--------------|
| 19643 | Patient005  | Patient093E  |
| 19643 | Patient005  | Patient094D  |
| 19643 | Patient056  | Patient108D  |
| 19643 | Patient056  | Patient187   |
| 19643 | Patient056  | Patient246A  |
| 19643 | Patient056  | Patient247A  |
| 19643 | Patient206  | Patient254   |
| 19644 | Patient005  | Patient094B  |
| 19644 | Patient056  | Patient236A  |
| 19645 | Patient005  | Patient094A  |
| 19645 | Patient056  | Patient109B  |
| 19645 | Patient056  | Patient222A  |
| 19645 | Patient201D | Patient210   |
| 19646 | Patient005  | Patient205   |
| 19646 | Patient056  | Patient127A  |
| 19646 | Patient056  | Patient218A  |
| 19646 | Patient056  | Patient222E  |
| 19647 | Patient183B | Patient254   |
| 19648 | Patient056  | Patient109C  |
| 19648 | Patient056  | Patient184   |
| 19648 | Patient091B | Patient204   |
| 19648 | Patient141G | Patient254   |
| 19648 | Patient183E | Patient254   |
| 19649 | Patient005  | Patient094E  |
| 19649 | Patient183C | Patient254   |
| 19650 | Patient056  | Patient109E  |
| 19651 | Patient056  | Patient218B  |
| 19651 | Patient141F | Patient254   |
| 19652 | Patient056  | Patient222F  |
| 19653 | Patient056  | Patient263B  |
| 19653 | Patient091B | Patient093B  |
| 19653 | Patient254  | Patient261E  |
| 19653 | Patient254  | Patient261G  |
| 19654 | Patient032E | Patient254   |
| 19654 | Patient056  | Patient099A  |
| 19654 | Patient056  | Patient109D  |
| 19654 | Patient066B | Patient189C1 |
| 19654 | Patient091B | Patient094D  |
| 19654 | Patient091B | Patient189C1 |
| 19654 | Patient145B | Patient254   |
| 19655 | Patient056  | Patient099C  |
| 19655 | Patient056  | Patient099D  |
| 19655 | Patient230C | Patient254   |
| 19656 | Patient056  | Patient099B  |
| 19657 | Patient032C | Patient254   |
| 19657 | Patient056  | Patient127B  |
| 19657 | Patient066B | Patient189C2 |
| 19657 | Patient091B | Patient093D  |
| 19658 | Patient056  | Patient149B  |
| 19658 | Patient091B | Patient093A  |

|       |              |              |
|-------|--------------|--------------|
| 19658 | Patient091B  | Patient189C2 |
| 19659 | Patient054   | Patient091B  |
| 19659 | Patient056   | Patient246C  |
| 19660 | Patient005   | Patient213B  |
| 19660 | Patient191   | Patient202   |
| 19661 | Patient056   | Patient246B  |
| 19661 | Patient091B  | Patient094A  |
| 19661 | Patient194   | Patient254   |
| 19662 | Patient056   | Patient246E  |
| 19662 | Patient091B  | Patient094E  |
| 19663 | Patient091B  | Patient093E  |
| 19664 | Patient091B  | Patient094C  |
| 19664 | Patient230G  | Patient254   |
| 19665 | Patient189C1 | Patient201C  |
| 19665 | Patient191   | Patient258E  |
| 19666 | Patient005   | Patient104A  |
| 19666 | Patient091B  | Patient094B  |
| 19667 | Patient056   | Patient246D  |
| 19667 | Patient191   | Patient251   |
| 19668 | Patient189C1 | Patient201D  |
| 19668 | Patient189C2 | Patient201C  |
| 19668 | Patient254   | Patient261C  |
| 19669 | Patient038   | Patient066B  |
| 19670 | Patient005   | Patient104B  |
| 19670 | Patient005   | Patient126E  |
| 19670 | Patient091B  | Patient213B  |
| 19670 | Patient161B  | Patient254   |
| 19670 | Patient189C2 | Patient201D  |
| 19673 | Patient091B  | Patient104A  |
| 19674 | Patient023   | Patient056   |
| 19675 | Patient091B  | Patient104B  |
| 19676 | Patient026C  | Patient191   |
| 19677 | Patient005   | Patient099E  |
| 19677 | Patient091B  | Patient100A  |
| 19678 | Patient091B  | Patient159   |
| 19679 | Patient005   | Patient232B  |
| 19679 | Patient091A  | Patient191   |
| 19680 | Patient005   | Patient220A  |
| 19680 | Patient021A2 | Patient091B  |
| 19681 | Patient005   | Patient232A  |
| 19681 | Patient005   | Patient232D  |
| 19681 | Patient091B  | Patient126E  |
| 19682 | Patient021A1 | Patient091B  |
| 19682 | Patient177   | Patient254   |
| 19683 | Patient005   | Patient232C  |
| 19683 | Patient005   | Patient232E  |
| 19683 | Patient075   | Patient191   |
| 19683 | Patient079C  | Patient091B  |
| 19683 | Patient092D  | Patient254   |
| 19684 | Patient005   | Patient196A  |

|       |              |              |
|-------|--------------|--------------|
| 19684 | Patient005   | Patient201B  |
| 19684 | Patient005   | Patient222B  |
| 19684 | Patient005   | Patient236B  |
| 19684 | Patient189C1 | Patient233   |
| 19684 | Patient191   | Patient217A  |
| 19685 | Patient005   | Patient157   |
| 19685 | Patient005   | Patient159   |
| 19685 | Patient005   | Patient196E  |
| 19685 | Patient005   | Patient252D  |
| 19685 | Patient093D  | Patient201C  |
| 19685 | Patient189C2 | Patient233   |
| 19685 | Patient213A  | Patient254   |
| 19686 | Patient091B  | Patient099E  |
| 19686 | Patient091B  | Patient205   |
| 19686 | Patient093A  | Patient201C  |
| 19686 | Patient093D  | Patient201D  |
| 19687 | Patient005   | Patient196B  |
| 19687 | Patient091B  | Patient126D  |
| 19688 | Patient005   | Patient196C  |
| 19688 | Patient079A1 | Patient091B  |
| 19688 | Patient091B  | Patient232B  |
| 19688 | Patient093A  | Patient201D  |
| 19689 | Patient005   | Patient189C1 |
| 19689 | Patient066B  | Patient204   |
| 19689 | Patient091B  | Patient252D  |
| 19689 | Patient191   | Patient217C  |
| 19690 | Patient079A2 | Patient091B  |
| 19690 | Patient079B  | Patient091B  |
| 19690 | Patient091B  | Patient131   |
| 19690 | Patient091B  | Patient220A  |
| 19690 | Patient091B  | Patient222B  |
| 19690 | Patient094C  | Patient201C  |
| 19691 | Patient005   | Patient201E  |
| 19691 | Patient005   | Patient222A  |
| 19691 | Patient005   | Patient246A  |
| 19691 | Patient005   | Patient247D  |
| 19691 | Patient091B  | Patient108B1 |
| 19691 | Patient091B  | Patient157   |
| 19691 | Patient091B  | Patient201B  |
| 19691 | Patient091B  | Patient232A  |
| 19691 | Patient091B  | Patient232D  |
| 19691 | Patient094C  | Patient201D  |
| 19691 | Patient191   | Patient217D  |
| 19691 | Patient201C  | Patient204   |
| 19692 | Patient005   | Patient201A  |
| 19692 | Patient005   | Patient265   |
| 19692 | Patient090   | Patient191   |
| 19692 | Patient091B  | Patient108B2 |
| 19692 | Patient091B  | Patient236B  |
| 19692 | Patient191   | Patient217E  |

|       |             |              |
|-------|-------------|--------------|
| 19692 | Patient191  | Patient217F  |
| 19692 | Patient191  | Patient217H  |
| 19692 | Patient191  | Patient217I  |
| 19692 | Patient230D | Patient254   |
| 19693 | Patient005  | Patient189C2 |
| 19693 | Patient005  | Patient218A  |
| 19693 | Patient066B | Patient189B  |
| 19693 | Patient086C | Patient191   |
| 19693 | Patient091B | Patient108A  |
| 19693 | Patient091B | Patient196E  |
| 19693 | Patient091B | Patient232C  |
| 19693 | Patient091B | Patient232E  |
| 19693 | Patient093E | Patient201C  |
| 19693 | Patient191  | Patient217B  |
| 19694 | Patient005  | Patient187   |
| 19694 | Patient032D | Patient254   |
| 19694 | Patient066A | Patient254   |
| 19694 | Patient081C | Patient191   |
| 19694 | Patient081E | Patient191   |
| 19694 | Patient091B | Patient097D  |
| 19694 | Patient091B | Patient252B  |
| 19694 | Patient093E | Patient201D  |
| 19694 | Patient094A | Patient201C  |
| 19694 | Patient094B | Patient201C  |
| 19694 | Patient189B | Patient201C  |
| 19695 | Patient005  | Patient246B  |
| 19695 | Patient091B | Patient097A  |
| 19695 | Patient091B | Patient108G  |
| 19696 | Patient005  | Patient196D  |
| 19696 | Patient005  | Patient236A  |
| 19696 | Patient005  | Patient246C  |
| 19696 | Patient091B | Patient196A  |
| 19696 | Patient094B | Patient201D  |
| 19697 | Patient033  | Patient191   |
| 19697 | Patient091B | Patient196B  |
| 19697 | Patient091B | Patient246A  |
| 19697 | Patient091B | Patient247D  |
| 19697 | Patient094A | Patient201D  |
| 19697 | Patient189B | Patient201D  |
| 19698 | Patient005  | Patient127A  |
| 19698 | Patient005  | Patient247E  |
| 19698 | Patient066B | Patient189A  |
| 19698 | Patient091B | Patient196C  |
| 19698 | Patient091B | Patient201E  |
| 19698 | Patient201D | Patient204   |
| 19699 | Patient005  | Patient184   |
| 19699 | Patient005  | Patient222E  |
| 19699 | Patient005  | Patient246E  |
| 19699 | Patient091B | Patient109A  |
| 19699 | Patient189A | Patient201C  |



|       |             |             |
|-------|-------------|-------------|
| 19699 | Patient191  | Patient217J |
| 19700 | Patient091B | Patient201A |
| 19700 | Patient091B | Patient222A |
| 19700 | Patient091B | Patient265  |
| 19700 | Patient141G | Patient191  |
| 19701 | Patient005  | Patient222D |
| 19701 | Patient005  | Patient246D |
| 19701 | Patient081F | Patient191  |
| 19701 | Patient091B | Patient097C |
| 19701 | Patient189A | Patient201D |
| 19701 | Patient189E | Patient201C |
| 19702 | Patient054  | Patient201C |
| 19702 | Patient091B | Patient097E |
| 19702 | Patient091B | Patient108H |
| 19702 | Patient091B | Patient187  |
| 19702 | Patient091B | Patient247E |
| 19702 | Patient091B | Patient252A |
| 19702 | Patient091B | Patient252F |
| 19703 | Patient022B | Patient254  |
| 19703 | Patient031  | Patient191  |
| 19703 | Patient081D | Patient191  |
| 19703 | Patient091B | Patient097B |
| 19703 | Patient091B | Patient246C |
| 19704 | Patient005  | Patient247B |
| 19704 | Patient005  | Patient247C |
| 19704 | Patient066B | Patient189E |
| 19704 | Patient091B | Patient108D |
| 19704 | Patient091B | Patient108F |
| 19704 | Patient091B | Patient109C |
| 19704 | Patient091B | Patient218A |
| 19704 | Patient091B | Patient236A |
| 19704 | Patient091B | Patient246B |
| 19704 | Patient141F | Patient191  |
| 19704 | Patient189E | Patient201D |
| 19705 | Patient005  | Patient099A |
| 19705 | Patient005  | Patient099D |
| 19705 | Patient005  | Patient149B |
| 19705 | Patient005  | Patient218B |
| 19705 | Patient005  | Patient222F |
| 19705 | Patient005  | Patient247A |
| 19705 | Patient005  | Patient263B |
| 19705 | Patient081B | Patient191  |
| 19705 | Patient086E | Patient191  |
| 19705 | Patient100B | Patient201C |
| 19705 | Patient191  | Patient207  |
| 19706 | Patient005  | Patient099B |
| 19706 | Patient005  | Patient127B |
| 19706 | Patient086A | Patient191  |
| 19706 | Patient091B | Patient109E |
| 19706 | Patient091B | Patient127A |

|       |              |              |
|-------|--------------|--------------|
| 19706 | Patient091B  | Patient247C  |
| 19707 | Patient091B  | Patient109D  |
| 19707 | Patient091B  | Patient184   |
| 19707 | Patient091B  | Patient222E  |
| 19708 | Patient005   | Patient099C  |
| 19708 | Patient091B  | Patient109B  |
| 19708 | Patient091B  | Patient246D  |
| 19708 | Patient091B  | Patient246E  |
| 19708 | Patient091B  | Patient247B  |
| 19708 | Patient093C  | Patient201C  |
| 19708 | Patient191   | Patient261G  |
| 19709 | Patient054   | Patient201D  |
| 19709 | Patient091B  | Patient222D  |
| 19709 | Patient100B  | Patient201D  |
| 19709 | Patient133   | Patient191   |
| 19710 | Patient086B  | Patient191   |
| 19710 | Patient091B  | Patient247A  |
| 19710 | Patient093C  | Patient201D  |
| 19710 | Patient191   | Patient230C  |
| 19712 | Patient091B  | Patient222F  |
| 19712 | Patient091B  | Patient263B  |
| 19713 | Patient081A1 | Patient191   |
| 19713 | Patient081A2 | Patient191   |
| 19714 | Patient091B  | Patient149B  |
| 19715 | Patient066B  | Patient104A  |
| 19715 | Patient091B  | Patient127B  |
| 19715 | Patient091B  | Patient218B  |
| 19715 | Patient167   | Patient191   |
| 19716 | Patient066B  | Patient104B  |
| 19716 | Patient152B  | Patient189C1 |
| 19716 | Patient191   | Patient194   |
| 19717 | Patient066B  | Patient131   |
| 19717 | Patient091B  | Patient099B  |
| 19717 | Patient152B  | Patient189C2 |
| 19717 | Patient191   | Patient192D  |
| 19718 | Patient005   | Patient100A  |
| 19718 | Patient091B  | Patient099D  |
| 19719 | Patient091B  | Patient099A  |
| 19719 | Patient091B  | Patient099C  |
| 19719 | Patient141A  | Patient191   |
| 19719 | Patient152A  | Patient189C1 |
| 19719 | Patient191   | Patient230G  |
| 19720 | Patient091B  | Patient196D  |
| 19720 | Patient141D  | Patient191   |
| 19720 | Patient152A  | Patient189C2 |
| 19721 | Patient191   | Patient230A  |
| 19722 | Patient191   | Patient241   |
| 19723 | Patient005   | Patient033   |
| 19723 | Patient056   | Patient171   |
| 19723 | Patient141B  | Patient191   |

|       |             |             |
|-------|-------------|-------------|
| 19724 | Patient066B | Patient252B |
| 19725 | Patient056  | Patient238  |
| 19725 | Patient066B | Patient093C |
| 19725 | Patient066B | Patient205  |
| 19725 | Patient141C | Patient191  |
| 19725 | Patient191  | Patient235A |
| 19726 | Patient093B | Patient201C |
| 19727 | Patient094D | Patient201C |
| 19727 | Patient201C | Patient205  |
| 19729 | Patient093B | Patient201D |
| 19730 | Patient094D | Patient201D |
| 19730 | Patient145B | Patient191  |
| 19732 | Patient191  | Patient242  |
| 19732 | Patient191  | Patient261E |
| 19733 | Patient066B | Patient252A |
| 19733 | Patient201D | Patient205  |
| 19734 | Patient032C | Patient191  |
| 19734 | Patient056  | Patient069  |
| 19734 | Patient191  | Patient261A |
| 19735 | Patient032B | Patient191  |
| 19735 | Patient032E | Patient191  |
| 19735 | Patient094E | Patient201C |
| 19737 | Patient005  | Patient126D |
| 19737 | Patient066B | Patient252F |
| 19737 | Patient094E | Patient201D |
| 19737 | Patient164  | Patient191  |
| 19738 | Patient013  | Patient254  |
| 19738 | Patient158  | Patient254  |
| 19739 | Patient056  | Patient164  |
| 19739 | Patient157  | Patient201C |
| 19739 | Patient191  | Patient230D |
| 19740 | Patient191  | Patient230E |
| 19741 | Patient157  | Patient201D |
| 19741 | Patient201C | Patient247D |
| 19742 | Patient034C | Patient191  |
| 19742 | Patient056  | Patient179  |
| 19743 | Patient032A | Patient191  |
| 19744 | Patient066B | Patient093B |
| 19744 | Patient145C | Patient191  |
| 19744 | Patient191  | Patient230F |
| 19744 | Patient191  | Patient261B |
| 19744 | Patient201D | Patient247D |
| 19745 | Patient056  | Patient180  |
| 19745 | Patient121A | Patient191  |
| 19745 | Patient191  | Patient261C |
| 19745 | Patient191  | Patient261D |
| 19747 | Patient034A | Patient191  |
| 19747 | Patient066B | Patient094D |
| 19748 | Patient056  | Patient100B |
| 19748 | Patient066E | Patient191  |

|       |             |              |
|-------|-------------|--------------|
| 19748 | Patient191  | Patient230B  |
| 19749 | Patient034E | Patient191   |
| 19749 | Patient066B | Patient093D  |
| 19749 | Patient066D | Patient191   |
| 19749 | Patient066F | Patient191   |
| 19750 | Patient056  | Patient114   |
| 19751 | Patient034D | Patient191   |
| 19751 | Patient100A | Patient201C  |
| 19751 | Patient201C | Patient213B  |
| 19751 | Patient201C | Patient247E  |
| 19752 | Patient066B | Patient093A  |
| 19752 | Patient066B | Patient094E  |
| 19752 | Patient121B | Patient191   |
| 19753 | Patient145A | Patient191   |
| 19754 | Patient034B | Patient191   |
| 19754 | Patient100A | Patient201D  |
| 19754 | Patient201D | Patient213B  |
| 19754 | Patient201D | Patient247E  |
| 19755 | Patient201C | Patient246A  |
| 19756 | Patient005  | Patient079C  |
| 19756 | Patient066B | Patient093E  |
| 19756 | Patient066B | Patient094C  |
| 19757 | Patient054  | Patient066B  |
| 19757 | Patient066B | Patient094A  |
| 19757 | Patient104A | Patient201C  |
| 19757 | Patient126E | Patient201C  |
| 19757 | Patient201D | Patient246A  |
| 19758 | Patient005  | Patient079A1 |
| 19758 | Patient026D | Patient191   |
| 19758 | Patient026E | Patient191   |
| 19758 | Patient056  | Patient058   |
| 19758 | Patient066B | Patient094B  |
| 19758 | Patient161B | Patient191   |
| 19758 | Patient201C | Patient247B  |
| 19758 | Patient201C | Patient247C  |
| 19759 | Patient066B | Patient213B  |
| 19759 | Patient183A | Patient191   |
| 19759 | Patient201C | Patient247A  |
| 19760 | Patient005  | Patient079A2 |
| 19760 | Patient005  | Patient079B  |
| 19760 | Patient104A | Patient201D  |
| 19760 | Patient126E | Patient201D  |
| 19760 | Patient201D | Patient247C  |
| 19761 | Patient104B | Patient201C  |
| 19761 | Patient126D | Patient201C  |
| 19761 | Patient201D | Patient247A  |
| 19761 | Patient201D | Patient247B  |
| 19761 | Patient210  | Patient254   |
| 19762 | Patient056  | Patient193   |
| 19763 | Patient201C | Patient232B  |

|       |              |              |
|-------|--------------|--------------|
| 19764 | Patient053A1 | Patient254   |
| 19764 | Patient104B  | Patient201D  |
| 19764 | Patient126D  | Patient201D  |
| 19765 | Patient131   | Patient201C  |
| 19765 | Patient183D  | Patient191   |
| 19766 | Patient021A2 | Patient201C  |
| 19766 | Patient066B  | Patient100A  |
| 19766 | Patient201C  | Patient232A  |
| 19766 | Patient201C  | Patient232D  |
| 19766 | Patient201D  | Patient232B  |
| 19767 | Patient005   | Patient131   |
| 19767 | Patient021A1 | Patient201C  |
| 19767 | Patient045A  | Patient191   |
| 19767 | Patient053C  | Patient191   |
| 19768 | Patient099E  | Patient201C  |
| 19768 | Patient131   | Patient201D  |
| 19768 | Patient201C  | Patient232C  |
| 19768 | Patient201C  | Patient232E  |
| 19768 | Patient201D  | Patient232A  |
| 19768 | Patient201D  | Patient232D  |
| 19769 | Patient021A2 | Patient201D  |
| 19769 | Patient108B1 | Patient201C  |
| 19769 | Patient108B2 | Patient201C  |
| 19769 | Patient201C  | Patient220A  |
| 19770 | Patient021A1 | Patient201D  |
| 19770 | Patient045C  | Patient191   |
| 19770 | Patient053A2 | Patient191   |
| 19770 | Patient056   | Patient089A1 |
| 19770 | Patient079C  | Patient201C  |
| 19770 | Patient201D  | Patient232E  |
| 19771 | Patient066B  | Patient126E  |
| 19771 | Patient099E  | Patient201D  |
| 19771 | Patient108B2 | Patient201D  |
| 19771 | Patient201D  | Patient232C  |
| 19772 | Patient023   | Patient091B  |
| 19772 | Patient053B  | Patient191   |
| 19772 | Patient079A1 | Patient201C  |
| 19772 | Patient097A  | Patient201C  |
| 19772 | Patient108B1 | Patient201D  |
| 19772 | Patient201B  | Patient201C  |
| 19773 | Patient079C  | Patient201D  |
| 19773 | Patient097D  | Patient201C  |
| 19773 | Patient108A  | Patient201C  |
| 19773 | Patient183B  | Patient191   |
| 19773 | Patient201D  | Patient220A  |
| 19774 | Patient005   | Patient252B  |
| 19774 | Patient079A1 | Patient201D  |
| 19774 | Patient079A2 | Patient201C  |
| 19774 | Patient079B  | Patient201C  |
| 19774 | Patient201C  | Patient222B  |

|       |              |              |
|-------|--------------|--------------|
| 19775 | Patient045B  | Patient191   |
| 19775 | Patient066B  | Patient222B  |
| 19775 | Patient097A  | Patient201D  |
| 19775 | Patient108A  | Patient201D  |
| 19775 | Patient108G  | Patient201C  |
| 19775 | Patient159   | Patient201C  |
| 19775 | Patient183E  | Patient191   |
| 19775 | Patient201B  | Patient201D  |
| 19775 | Patient201C  | Patient236B  |
| 19775 | Patient201C  | Patient252D  |
| 19776 | Patient097D  | Patient201D  |
| 19776 | Patient201D  | Patient222B  |
| 19777 | Patient066B  | Patient079C  |
| 19777 | Patient066B  | Patient099E  |
| 19777 | Patient066B  | Patient246A  |
| 19777 | Patient079A2 | Patient201D  |
| 19777 | Patient079B  | Patient201D  |
| 19777 | Patient159   | Patient201D  |
| 19777 | Patient183C  | Patient191   |
| 19778 | Patient005   | Patient108B1 |
| 19778 | Patient066B  | Patient232B  |
| 19778 | Patient108G  | Patient201D  |
| 19778 | Patient150C  | Patient191   |
| 19778 | Patient196A  | Patient201C  |
| 19778 | Patient196E  | Patient201C  |
| 19778 | Patient201C  | Patient252B  |
| 19778 | Patient201D  | Patient236B  |
| 19778 | Patient201D  | Patient252D  |
| 19779 | Patient005   | Patient108B2 |
| 19779 | Patient066B  | Patient079A1 |
| 19779 | Patient066B  | Patient108B1 |
| 19779 | Patient066B  | Patient108B2 |
| 19779 | Patient066B  | Patient126D  |
| 19779 | Patient066B  | Patient232A  |
| 19779 | Patient066B  | Patient252D  |
| 19779 | Patient150A  | Patient191   |
| 19779 | Patient201C  | Patient201E  |
| 19780 | Patient007A  | Patient191   |
| 19780 | Patient056   | Patient088   |
| 19780 | Patient066B  | Patient108A  |
| 19780 | Patient066B  | Patient220A  |
| 19780 | Patient066B  | Patient232D  |
| 19780 | Patient066B  | Patient236B  |
| 19780 | Patient066B  | Patient247D  |
| 19780 | Patient109A  | Patient201C  |
| 19780 | Patient196A  | Patient201D  |
| 19780 | Patient196B  | Patient201C  |
| 19780 | Patient201A  | Patient201C  |
| 19781 | Patient005   | Patient108A  |
| 19781 | Patient005   | Patient252F  |

|       |             |              |
|-------|-------------|--------------|
| 19781 | Patient056  | Patient089A2 |
| 19781 | Patient066B | Patient079B  |
| 19781 | Patient066B | Patient159   |
| 19781 | Patient066B | Patient232E  |
| 19781 | Patient097C | Patient201C  |
| 19781 | Patient196C | Patient201C  |
| 19781 | Patient196E | Patient201D  |
| 19781 | Patient201D | Patient201E  |
| 19781 | Patient201D | Patient252B  |
| 19781 | Patient202  | Patient254   |
| 19782 | Patient007B | Patient191   |
| 19782 | Patient066B | Patient079A2 |
| 19782 | Patient066B | Patient097D  |
| 19782 | Patient066B | Patient232C  |
| 19782 | Patient097E | Patient201C  |
| 19782 | Patient108H | Patient201C  |
| 19782 | Patient201C | Patient222A  |
| 19783 | Patient005  | Patient108G  |
| 19783 | Patient005  | Patient252A  |
| 19783 | Patient066B | Patient097A  |
| 19783 | Patient066B | Patient108G  |
| 19783 | Patient066B | Patient246B  |
| 19783 | Patient066B | Patient246C  |
| 19783 | Patient066B | Patient247E  |
| 19783 | Patient097B | Patient201C  |
| 19783 | Patient108D | Patient201C  |
| 19783 | Patient109A | Patient201D  |
| 19783 | Patient120A | Patient191   |
| 19783 | Patient196B | Patient201D  |
| 19783 | Patient196C | Patient201D  |
| 19783 | Patient201A | Patient201D  |
| 19784 | Patient066B | Patient201B  |
| 19784 | Patient097C | Patient201D  |
| 19784 | Patient109C | Patient201C  |
| 19784 | Patient201C | Patient265   |
| 19784 | Patient201D | Patient222A  |
| 19785 | Patient066B | Patient196A  |
| 19785 | Patient066B | Patient196E  |
| 19785 | Patient097B | Patient201D  |
| 19785 | Patient097E | Patient201D  |
| 19785 | Patient108H | Patient201D  |
| 19785 | Patient201C | Patient218A  |
| 19786 | Patient066B | Patient246E  |
| 19786 | Patient108D | Patient201D  |
| 19786 | Patient109B | Patient201C  |
| 19786 | Patient109C | Patient201D  |
| 19786 | Patient109E | Patient201C  |
| 19786 | Patient171  | Patient201C  |
| 19786 | Patient187  | Patient201C  |
| 19786 | Patient201C | Patient252F  |

|       |             |             |
|-------|-------------|-------------|
| 19786 | Patient201D | Patient218A |
| 19786 | Patient201D | Patient265  |
| 19787 | Patient026F | Patient191  |
| 19787 | Patient066B | Patient196B |
| 19787 | Patient066B | Patient196C |
| 19787 | Patient066B | Patient201E |
| 19787 | Patient109D | Patient201C |
| 19787 | Patient114  | Patient201C |
| 19787 | Patient191  | Patient206  |
| 19787 | Patient201C | Patient236A |
| 19787 | Patient201C | Patient252A |
| 19788 | Patient005  | Patient109A |
| 19788 | Patient026A | Patient191  |
| 19788 | Patient066B | Patient109A |
| 19788 | Patient066B | Patient157  |
| 19788 | Patient109B | Patient201D |
| 19788 | Patient109E | Patient201D |
| 19788 | Patient127A | Patient201C |
| 19789 | Patient066B | Patient222A |
| 19789 | Patient066B | Patient246D |
| 19789 | Patient066B | Patient265  |
| 19789 | Patient171  | Patient201D |
| 19789 | Patient187  | Patient201D |
| 19789 | Patient196D | Patient201C |
| 19789 | Patient201C | Patient222E |
| 19789 | Patient201D | Patient252F |
| 19790 | Patient066B | Patient097C |
| 19790 | Patient066B | Patient097E |
| 19790 | Patient066B | Patient108H |
| 19790 | Patient066B | Patient201A |
| 19790 | Patient066B | Patient247C |
| 19790 | Patient109D | Patient201D |
| 19790 | Patient114  | Patient201D |
| 19790 | Patient184  | Patient201C |
| 19790 | Patient201D | Patient236A |
| 19790 | Patient201D | Patient252A |
| 19791 | Patient005  | Patient097A |
| 19791 | Patient005  | Patient097D |
| 19791 | Patient005  | Patient108H |
| 19791 | Patient066B | Patient108F |
| 19791 | Patient066B | Patient109C |
| 19791 | Patient066B | Patient187  |
| 19791 | Patient066B | Patient247B |
| 19791 | Patient127A | Patient201D |
| 19791 | Patient196D | Patient201D |
| 19791 | Patient201C | Patient222D |
| 19792 | Patient005  | Patient108D |
| 19792 | Patient005  | Patient108F |
| 19792 | Patient005  | Patient109C |
| 19792 | Patient026B | Patient191  |



|       |             |             |
|-------|-------------|-------------|
| 19792 | Patient066B | Patient097B |
| 19792 | Patient066B | Patient218A |
| 19792 | Patient066B | Patient236A |
| 19792 | Patient066B | Patient247A |
| 19792 | Patient126C | Patient191  |
| 19792 | Patient184  | Patient201D |
| 19792 | Patient201D | Patient222E |
| 19793 | Patient066B | Patient108D |
| 19793 | Patient066B | Patient109E |
| 19793 | Patient201D | Patient222D |
| 19794 | Patient005  | Patient109E |
| 19794 | Patient201C | Patient222F |
| 19794 | Patient201C | Patient246B |
| 19794 | Patient201C | Patient246C |
| 19795 | Patient005  | Patient109B |
| 19795 | Patient005  | Patient109D |
| 19795 | Patient066B | Patient109D |
| 19795 | Patient066B | Patient184  |
| 19795 | Patient099A | Patient201C |
| 19795 | Patient108F | Patient201C |
| 19795 | Patient201C | Patient263B |
| 19796 | Patient066B | Patient222D |
| 19796 | Patient099D | Patient201C |
| 19796 | Patient127B | Patient201C |
| 19796 | Patient149B | Patient201C |
| 19797 | Patient066B | Patient109B |
| 19797 | Patient066B | Patient127A |
| 19797 | Patient066B | Patient222E |
| 19797 | Patient099B | Patient201C |
| 19797 | Patient108F | Patient201D |
| 19797 | Patient201D | Patient222F |
| 19797 | Patient201D | Patient246B |
| 19797 | Patient201D | Patient246C |
| 19798 | Patient005  | Patient097C |
| 19798 | Patient005  | Patient097E |
| 19798 | Patient099A | Patient201D |
| 19798 | Patient099D | Patient201D |
| 19798 | Patient201C | Patient218B |
| 19798 | Patient201D | Patient263B |
| 19799 | Patient099C | Patient201C |
| 19799 | Patient127B | Patient201D |
| 19799 | Patient149B | Patient201D |
| 19799 | Patient201C | Patient246D |
| 19799 | Patient201C | Patient246E |
| 19799 | Patient201D | Patient218B |
| 19800 | Patient005  | Patient097B |
| 19800 | Patient099B | Patient201D |
| 19800 | Patient201D | Patient246E |
| 19801 | Patient099C | Patient201D |
| 19802 | Patient066B | Patient222F |

|       |              |             |
|-------|--------------|-------------|
| 19802 | Patient066B  | Patient263B |
| 19802 | Patient150B  | Patient191  |
| 19802 | Patient201D  | Patient246D |
| 19803 | Patient038   | Patient254  |
| 19803 | Patient066B  | Patient218B |
| 19803 | Patient092H  | Patient191  |
| 19803 | Patient191   | Patient220B |
| 19803 | Patient204   | Patient254  |
| 19805 | Patient066B  | Patient149B |
| 19805 | Patient092G  | Patient191  |
| 19806 | Patient023   | Patient201C |
| 19806 | Patient066B  | Patient099B |
| 19806 | Patient066B  | Patient099D |
| 19806 | Patient066B  | Patient127B |
| 19806 | Patient086C  | Patient254  |
| 19806 | Patient176   | Patient191  |
| 19807 | Patient066B  | Patient099C |
| 19807 | Patient091B  | Patient114  |
| 19808 | Patient066B  | Patient099A |
| 19808 | Patient123A  | Patient191  |
| 19809 | Patient023   | Patient201D |
| 19809 | Patient066B  | Patient114  |
| 19809 | Patient066B  | Patient196D |
| 19810 | Patient021A2 | Patient066B |
| 19810 | Patient191   | Patient192A |
| 19811 | Patient123C  | Patient191  |
| 19812 | Patient021A1 | Patient066B |
| 19812 | Patient114   | Patient233  |
| 19812 | Patient123B  | Patient191  |
| 19814 | Patient028   | Patient254  |
| 19814 | Patient192A  | Patient254  |
| 19816 | Patient191   | Patient192B |
| 19817 | Patient123D  | Patient191  |
| 19818 | Patient086E  | Patient254  |
| 19819 | Patient086A  | Patient254  |
| 19819 | Patient173B  | Patient191  |
| 19819 | Patient181B  | Patient191  |
| 19819 | Patient191   | Patient192C |
| 19820 | Patient005   | Patient023  |
| 19820 | Patient103A  | Patient191  |
| 19821 | Patient091B  | Patient238  |
| 19821 | Patient192B  | Patient254  |
| 19822 | Patient181A  | Patient191  |
| 19822 | Patient192C  | Patient254  |
| 19823 | Patient066B  | Patient171  |
| 19823 | Patient191   | Patient224B |
| 19824 | Patient066B  | Patient238  |
| 19824 | Patient086B  | Patient254  |
| 19824 | Patient091B  | Patient171  |
| 19827 | Patient191   | Patient192F |

|       |              |              |
|-------|--------------|--------------|
| 19829 | Patient191   | Patient192E  |
| 19830 | Patient092E  | Patient191   |
| 19832 | Patient053C  | Patient254   |
| 19832 | Patient191   | Patient195   |
| 19832 | Patient192F  | Patient254   |
| 19833 | Patient029   | Patient091B  |
| 19834 | Patient092A  | Patient191   |
| 19834 | Patient092B  | Patient191   |
| 19834 | Patient192E  | Patient254   |
| 19835 | Patient053A2 | Patient254   |
| 19835 | Patient066B  | Patient069   |
| 19835 | Patient193   | Patient201C  |
| 19836 | Patient053B  | Patient254   |
| 19837 | Patient005   | Patient058   |
| 19837 | Patient069   | Patient091B  |
| 19838 | Patient193   | Patient201D  |
| 19839 | Patient191   | Patient224A  |
| 19840 | Patient005   | Patient089A1 |
| 19840 | Patient103B  | Patient191   |
| 19841 | Patient103C  | Patient191   |
| 19841 | Patient189C1 | Patient215   |
| 19841 | Patient205   | Patient254   |
| 19842 | Patient189C2 | Patient208   |
| 19842 | Patient189C2 | Patient215   |
| 19843 | Patient026C  | Patient254   |
| 19843 | Patient058   | Patient201C  |
| 19844 | Patient091B  | Patient179   |
| 19844 | Patient191   | Patient235E  |
| 19845 | Patient005   | Patient021A2 |
| 19845 | Patient089A1 | Patient201C  |
| 19845 | Patient126A  | Patient191   |
| 19845 | Patient189C1 | Patient208   |
| 19846 | Patient005   | Patient021A1 |
| 19846 | Patient058   | Patient201D  |
| 19846 | Patient191   | Patient235F  |
| 19847 | Patient066B  | Patient179   |
| 19847 | Patient121A  | Patient254   |
| 19847 | Patient235A  | Patient254   |
| 19848 | Patient089A1 | Patient201D  |
| 19849 | Patient091B  | Patient180   |
| 19850 | Patient066B  | Patient100B  |
| 19850 | Patient091B  | Patient100B  |
| 19850 | Patient152A  | Patient179   |
| 19850 | Patient152B  | Patient179   |
| 19850 | Patient201C  | Patient238   |
| 19851 | Patient103D  | Patient191   |
| 19852 | Patient005   | Patient114   |
| 19853 | Patient005   | Patient089A2 |
| 19853 | Patient066B  | Patient180   |
| 19853 | Patient114   | Patient152A  |

|       |              |             |
|-------|--------------|-------------|
| 19853 | Patient114   | Patient152B |
| 19854 | Patient005   | Patient088  |
| 19854 | Patient069   | Patient201C |
| 19854 | Patient191   | Patient213A |
| 19854 | Patient201D  | Patient238  |
| 19854 | Patient217A  | Patient254  |
| 19855 | Patient177   | Patient191  |
| 19856 | Patient103E  | Patient191  |
| 19856 | Patient121B  | Patient254  |
| 19857 | Patient254   | Patient258E |
| 19858 | Patient069   | Patient201D |
| 19858 | Patient089A2 | Patient201C |
| 19859 | Patient029   | Patient201C |
| 19859 | Patient066B  | Patient193  |
| 19859 | Patient088   | Patient201C |
| 19859 | Patient217C  | Patient254  |
| 19860 | Patient058   | Patient215  |
| 19860 | Patient217H  | Patient254  |
| 19860 | Patient217I  | Patient254  |
| 19861 | Patient089A2 | Patient201D |
| 19861 | Patient217D  | Patient254  |
| 19862 | Patient088   | Patient201D |
| 19862 | Patient089A1 | Patient091B |
| 19862 | Patient091B  | Patient193  |
| 19862 | Patient093D  | Patient254  |
| 19862 | Patient094A  | Patient254  |
| 19862 | Patient217B  | Patient254  |
| 19862 | Patient217E  | Patient254  |
| 19862 | Patient217F  | Patient254  |
| 19863 | Patient029   | Patient201D |
| 19863 | Patient152A  | Patient238  |
| 19863 | Patient152B  | Patient238  |
| 19864 | Patient023   | Patient066B |
| 19864 | Patient179   | Patient201C |
| 19865 | Patient180   | Patient201C |
| 19867 | Patient093E  | Patient254  |
| 19867 | Patient152A  | Patient180  |
| 19867 | Patient152B  | Patient180  |
| 19867 | Patient189C1 | Patient191  |
| 19868 | Patient058   | Patient066B |
| 19868 | Patient179   | Patient201D |
| 19869 | Patient093A  | Patient254  |
| 19869 | Patient094B  | Patient254  |
| 19869 | Patient152A  | Patient171  |
| 19869 | Patient152B  | Patient171  |
| 19869 | Patient171   | Patient233  |
| 19869 | Patient217J  | Patient254  |
| 19870 | Patient058   | Patient091B |
| 19870 | Patient180   | Patient201D |
| 19870 | Patient189C2 | Patient191  |

|       |              |              |
|-------|--------------|--------------|
| 19871 | Patient094C  | Patient254   |
| 19872 | Patient058   | Patient258C1 |
| 19872 | Patient058   | Patient258C2 |
| 19872 | Patient066B  | Patient089A1 |
| 19873 | Patient029   | Patient066B  |
| 19875 | Patient191   | Patient235C  |
| 19876 | Patient054   | Patient254   |
| 19877 | Patient135   | Patient215   |
| 19879 | Patient005   | Patient069   |
| 19879 | Patient131   | Patient254   |
| 19879 | Patient179   | Patient233   |
| 19880 | Patient191   | Patient235B  |
| 19883 | Patient173A  | Patient191   |
| 19884 | Patient022B  | Patient191   |
| 19884 | Patient026F  | Patient254   |
| 19884 | Patient135   | Patient152A  |
| 19884 | Patient135   | Patient152B  |
| 19885 | Patient066B  | Patient088   |
| 19885 | Patient066B  | Patient089A2 |
| 19886 | Patient089A2 | Patient091B  |
| 19886 | Patient092H  | Patient254   |
| 19886 | Patient093C  | Patient254   |
| 19886 | Patient233   | Patient238   |
| 19887 | Patient026A  | Patient254   |
| 19887 | Patient026B  | Patient254   |
| 19887 | Patient088   | Patient091B  |
| 19888 | Patient045D  | Patient191   |
| 19888 | Patient092G  | Patient254   |
| 19889 | Patient081E  | Patient254   |
| 19892 | Patient235E  | Patient254   |
| 19893 | Patient081F  | Patient254   |
| 19893 | Patient180   | Patient233   |
| 19894 | Patient005   | Patient179   |
| 19894 | Patient235F  | Patient254   |
| 19895 | Patient069   | Patient198   |
| 19895 | Patient089A1 | Patient215   |
| 19896 | Patient069   | Patient152A  |
| 19896 | Patient069   | Patient152B  |
| 19897 | Patient081B  | Patient254   |
| 19898 | Patient029   | Patient152B  |
| 19898 | Patient088   | Patient215   |
| 19899 | Patient089A2 | Patient215   |
| 19900 | Patient029   | Patient152A  |
| 19900 | Patient120B  | Patient191   |
| 19902 | Patient120D  | Patient191   |
| 19903 | Patient066A  | Patient191   |
| 19904 | Patient005   | Patient193   |
| 19905 | Patient093B  | Patient254   |
| 19905 | Patient120C  | Patient191   |
| 19905 | Patient192D  | Patient254   |

|       |              |              |
|-------|--------------|--------------|
| 19906 | Patient135   | Patient198   |
| 19906 | Patient152A  | Patient193   |
| 19906 | Patient152B  | Patient193   |
| 19906 | Patient235C  | Patient254   |
| 19907 | Patient058   | Patient233   |
| 19907 | Patient089A1 | Patient258C1 |
| 19907 | Patient089A1 | Patient258C2 |
| 19907 | Patient120A  | Patient254   |
| 19908 | Patient081A2 | Patient254   |
| 19909 | Patient056   | Patient093D  |
| 19909 | Patient081A1 | Patient254   |
| 19909 | Patient158   | Patient191   |
| 19910 | Patient005   | Patient180   |
| 19910 | Patient058   | Patient152A  |
| 19910 | Patient058   | Patient152B  |
| 19910 | Patient069   | Patient233   |
| 19910 | Patient088   | Patient258C1 |
| 19910 | Patient088   | Patient258C2 |
| 19910 | Patient100B  | Patient152A  |
| 19910 | Patient100B  | Patient152B  |
| 19910 | Patient100B  | Patient233   |
| 19911 | Patient089A2 | Patient258C1 |
| 19911 | Patient089A2 | Patient258C2 |
| 19911 | Patient094D  | Patient254   |
| 19912 | Patient032B  | Patient254   |
| 19912 | Patient193   | Patient233   |
| 19913 | Patient056   | Patient093A  |
| 19913 | Patient092E  | Patient254   |
| 19913 | Patient232B  | Patient254   |
| 19914 | Patient029   | Patient233   |
| 19914 | Patient126C  | Patient254   |
| 19915 | Patient254   | Patient261A  |
| 19916 | Patient208   | Patient238   |
| 19916 | Patient235B  | Patient254   |
| 19917 | Patient056   | Patient093E  |
| 19917 | Patient092B  | Patient254   |
| 19917 | Patient123A  | Patient254   |
| 19918 | Patient092A  | Patient254   |
| 19918 | Patient126E  | Patient254   |
| 19919 | Patient056   | Patient094B  |
| 19919 | Patient056   | Patient094C  |
| 19919 | Patient056   | Patient204   |
| 19919 | Patient232D  | Patient254   |
| 19920 | Patient034C  | Patient254   |
| 19920 | Patient094E  | Patient254   |
| 19920 | Patient230A  | Patient254   |
| 19921 | Patient032A  | Patient254   |
| 19921 | Patient069   | Patient208   |
| 19921 | Patient108B2 | Patient254   |
| 19921 | Patient141D  | Patient254   |

|       |              |              |
|-------|--------------|--------------|
| 19921 | Patient232A  | Patient254   |
| 19921 | Patient232E  | Patient254   |
| 19921 | Patient238   | Patient258C1 |
| 19921 | Patient238   | Patient258C2 |
| 19922 | Patient033   | Patient056   |
| 19922 | Patient123B  | Patient254   |
| 19922 | Patient123C  | Patient254   |
| 19922 | Patient232C  | Patient254   |
| 19923 | Patient005   | Patient171   |
| 19923 | Patient005   | Patient238   |
| 19923 | Patient114   | Patient208   |
| 19924 | Patient089A1 | Patient152A  |
| 19924 | Patient089A1 | Patient152B  |
| 19924 | Patient108B1 | Patient254   |
| 19925 | Patient034A  | Patient254   |
| 19926 | Patient126D  | Patient254   |
| 19926 | Patient254   | Patient261B  |
| 19927 | Patient066E  | Patient254   |
| 19927 | Patient066F  | Patient254   |
| 19927 | Patient123D  | Patient254   |
| 19927 | Patient141A  | Patient254   |
| 19927 | Patient189C1 | Patient258C1 |
| 19927 | Patient189C1 | Patient258C2 |
| 19927 | Patient189C2 | Patient258C1 |
| 19927 | Patient189C2 | Patient258C2 |
| 19928 | Patient034B  | Patient254   |
| 19928 | Patient089A2 | Patient152A  |
| 19928 | Patient089A2 | Patient152B  |
| 19929 | Patient034D  | Patient254   |
| 19929 | Patient034E  | Patient254   |
| 19929 | Patient088   | Patient152A  |
| 19929 | Patient088   | Patient152B  |
| 19929 | Patient100B  | Patient208   |
| 19929 | Patient254   | Patient261D  |
| 19930 | Patient089A1 | Patient233   |
| 19930 | Patient179   | Patient215   |
| 19931 | Patient141B  | Patient254   |
| 19932 | Patient066D  | Patient254   |
| 19932 | Patient145C  | Patient254   |
| 19933 | Patient005   | Patient100B  |
| 19933 | Patient088   | Patient233   |
| 19933 | Patient141C  | Patient254   |
| 19934 | Patient022A  | Patient189C1 |
| 19934 | Patient022A  | Patient189C2 |
| 19934 | Patient089A2 | Patient233   |
| 19934 | Patient135   | Patient233   |
| 19935 | Patient230E  | Patient254   |
| 19936 | Patient191   | Patient210   |
| 19937 | Patient100B  | Patient258C1 |
| 19938 | Patient100B  | Patient258C2 |

|       |              |              |
|-------|--------------|--------------|
| 19939 | Patient114   | Patient254   |
| 19940 | Patient028   | Patient191   |
| 19941 | Patient135   | Patient258C1 |
| 19941 | Patient145A  | Patient254   |
| 19942 | Patient135   | Patient258C2 |
| 19943 | Patient069   | Patient254   |
| 19943 | Patient230F  | Patient254   |
| 19947 | Patient023   | Patient254   |
| 19947 | Patient029   | Patient258C1 |
| 19947 | Patient029   | Patient258C2 |
| 19947 | Patient069   | Patient149A  |
| 19947 | Patient126A  | Patient254   |
| 19947 | Patient171   | Patient258C1 |
| 19947 | Patient171   | Patient258C2 |
| 19947 | Patient230B  | Patient254   |
| 19948 | Patient120B  | Patient254   |
| 19948 | Patient191   | Patient196F  |
| 19950 | Patient120D  | Patient254   |
| 19950 | Patient193   | Patient208   |
| 19952 | Patient120C  | Patient254   |
| 19953 | Patient058   | Patient198   |
| 19953 | Patient069   | Patient215   |
| 19953 | Patient191   | Patient222C  |
| 19954 | Patient005   | Patient029   |
| 19954 | Patient135   | Patient208   |
| 19955 | Patient180   | Patient215   |
| 19958 | Patient114   | Patient215   |
| 19959 | Patient074D  | Patient191   |
| 19959 | Patient191   | Patient263A  |
| 19961 | Patient056   | Patient205   |
| 19962 | Patient029   | Patient254   |
| 19963 | Patient029   | Patient208   |
| 19963 | Patient074B  | Patient191   |
| 19964 | Patient173B  | Patient254   |
| 19965 | Patient074C  | Patient191   |
| 19967 | Patient074A  | Patient191   |
| 19967 | Patient089A1 | Patient198   |
| 19967 | Patient224B  | Patient254   |
| 19968 | Patient171   | Patient208   |
| 19969 | Patient181B  | Patient254   |
| 19970 | Patient181A  | Patient254   |
| 19971 | Patient022A  | Patient114   |
| 19971 | Patient089A2 | Patient198   |
| 19971 | Patient224A  | Patient254   |
| 19972 | Patient088   | Patient198   |
| 19972 | Patient189C1 | Patient198   |
| 19972 | Patient238   | Patient254   |
| 19973 | Patient189C2 | Patient198   |
| 19974 | Patient074E  | Patient191   |
| 19975 | Patient038   | Patient191   |



|       |              |             |
|-------|--------------|-------------|
| 19977 | Patient056   | Patient196D |
| 19980 | Patient103A  | Patient254  |
| 19984 | Patient179   | Patient208  |
| 19984 | Patient193   | Patient215  |
| 19987 | Patient056   | Patient222D |
| 19987 | Patient100B  | Patient254  |
| 19988 | Patient054   | Patient191  |
| 19988 | Patient103B  | Patient254  |
| 19990 | Patient103C  | Patient254  |
| 19990 | Patient191   | Patient204  |
| 19993 | Patient045D  | Patient254  |
| 19997 | Patient100B  | Patient198  |
| 19997 | Patient180   | Patient208  |
| 20000 | Patient171   | Patient198  |
| 20001 | Patient198   | Patient238  |
| 20003 | Patient173A  | Patient254  |
| 20003 | Patient191   | Patient238  |
| 20005 | Patient069   | Patient191  |
| 20005 | Patient094A  | Patient191  |
| 20007 | Patient029   | Patient198  |
| 20008 | Patient093D  | Patient191  |
| 20008 | Patient215   | Patient238  |
| 20010 | Patient103D  | Patient254  |
| 20011 | Patient093A  | Patient191  |
| 20013 | Patient093E  | Patient191  |
| 20014 | Patient103E  | Patient254  |
| 20016 | Patient094B  | Patient191  |
| 20016 | Patient189C1 | Patient254  |
| 20016 | Patient189C2 | Patient254  |
| 20017 | Patient094C  | Patient191  |
| 20018 | Patient100B  | Patient215  |
| 20019 | Patient104A  | Patient191  |
| 20019 | Patient171   | Patient215  |
| 20019 | Patient193   | Patient254  |
| 20021 | Patient100B  | Patient191  |
| 20021 | Patient104B  | Patient191  |
| 20021 | Patient196F  | Patient254  |
| 20024 | Patient180   | Patient191  |
| 20026 | Patient254   | Patient263A |
| 20027 | Patient029   | Patient191  |
| 20027 | Patient157   | Patient191  |
| 20029 | Patient114   | Patient191  |
| 20029 | Patient191   | Patient205  |
| 20029 | Patient222C  | Patient254  |
| 20030 | Patient179   | Patient191  |
| 20031 | Patient093C  | Patient191  |
| 20032 | Patient022A  | Patient171  |
| 20034 | Patient195   | Patient254  |
| 20041 | Patient022A  | Patient193  |
| 20041 | Patient100B  | Patient149A |

|       |              |              |
|-------|--------------|--------------|
| 20042 | Patient022A  | Patient058   |
| 20043 | Patient171   | Patient191   |
| 20044 | Patient022A  | Patient100B  |
| 20047 | Patient074D  | Patient254   |
| 20051 | Patient074B  | Patient254   |
| 20051 | Patient247D  | Patient254   |
| 20052 | Patient074C  | Patient254   |
| 20053 | Patient093B  | Patient191   |
| 20055 | Patient074A  | Patient254   |
| 20056 | Patient252B  | Patient254   |
| 20057 | Patient094D  | Patient191   |
| 20057 | Patient191   | Patient247D  |
| 20058 | Patient058   | Patient208   |
| 20058 | Patient149A  | Patient238   |
| 20058 | Patient157   | Patient254   |
| 20060 | Patient189B  | Patient191   |
| 20061 | Patient100A  | Patient191   |
| 20061 | Patient104B  | Patient254   |
| 20062 | Patient029   | Patient215   |
| 20062 | Patient074E  | Patient254   |
| 20063 | Patient104A  | Patient254   |
| 20063 | Patient191   | Patient213B  |
| 20063 | Patient246A  | Patient254   |
| 20064 | Patient189E  | Patient191   |
| 20065 | Patient191   | Patient193   |
| 20066 | Patient029   | Patient149A  |
| 20066 | Patient058   | Patient191   |
| 20066 | Patient189A  | Patient191   |
| 20066 | Patient252A  | Patient254   |
| 20068 | Patient089A1 | Patient191   |
| 20068 | Patient094E  | Patient191   |
| 20068 | Patient247A  | Patient254   |
| 20068 | Patient247E  | Patient254   |
| 20069 | Patient247B  | Patient254   |
| 20069 | Patient247C  | Patient254   |
| 20071 | Patient099E  | Patient191   |
| 20071 | Patient114   | Patient258C1 |
| 20072 | Patient114   | Patient258C2 |
| 20073 | Patient022A  | Patient089A2 |
| 20073 | Patient252F  | Patient254   |
| 20075 | Patient022A  | Patient089A1 |
| 20076 | Patient022A  | Patient088   |
| 20077 | Patient191   | Patient246A  |
| 20080 | Patient022A  | Patient179   |
| 20080 | Patient159   | Patient191   |
| 20082 | Patient191   | Patient247A  |
| 20082 | Patient191   | Patient247C  |
| 20084 | Patient088   | Patient191   |
| 20084 | Patient179   | Patient258C1 |
| 20084 | Patient179   | Patient258C2 |

|       |              |              |
|-------|--------------|--------------|
| 20086 | Patient089A1 | Patient208   |
| 20086 | Patient191   | Patient247B  |
| 20086 | Patient191   | Patient247E  |
| 20087 | Patient191   | Patient252D  |
| 20089 | Patient088   | Patient208   |
| 20089 | Patient089A2 | Patient208   |
| 20090 | Patient191   | Patient222B  |
| 20091 | Patient089A2 | Patient191   |
| 20093 | Patient191   | Patient232B  |
| 20094 | Patient126E  | Patient191   |
| 20094 | Patient213B  | Patient254   |
| 20095 | Patient191   | Patient201B  |
| 20095 | Patient191   | Patient220A  |
| 20095 | Patient191   | Patient232D  |
| 20097 | Patient180   | Patient258C1 |
| 20097 | Patient180   | Patient258C2 |
| 20097 | Patient189B  | Patient254   |
| 20097 | Patient191   | Patient236B  |
| 20098 | Patient191   | Patient196A  |
| 20098 | Patient191   | Patient232E  |
| 20099 | Patient191   | Patient232A  |
| 20100 | Patient099E  | Patient254   |
| 20100 | Patient126D  | Patient191   |
| 20100 | Patient189A  | Patient254   |
| 20100 | Patient191   | Patient232C  |
| 20101 | Patient131   | Patient191   |
| 20101 | Patient189E  | Patient254   |
| 20101 | Patient191   | Patient196E  |
| 20101 | Patient191   | Patient218A  |
| 20102 | Patient191   | Patient222A  |
| 20102 | Patient191   | Patient252B  |
| 20103 | Patient108A  | Patient191   |
| 20103 | Patient127A  | Patient191   |
| 20103 | Patient187   | Patient191   |
| 20104 | Patient079B  | Patient191   |
| 20104 | Patient193   | Patient258C1 |
| 20104 | Patient193   | Patient258C2 |
| 20104 | Patient246B  | Patient254   |
| 20105 | Patient159   | Patient254   |
| 20105 | Patient191   | Patient196B  |
| 20106 | Patient079A1 | Patient191   |
| 20106 | Patient079C  | Patient191   |
| 20106 | Patient191   | Patient196C  |
| 20107 | Patient079A2 | Patient191   |
| 20107 | Patient079B  | Patient254   |
| 20107 | Patient108A  | Patient254   |
| 20107 | Patient114   | Patient198   |
| 20107 | Patient191   | Patient201A  |
| 20107 | Patient220A  | Patient254   |
| 20108 | Patient099B  | Patient191   |

|       |              |              |
|-------|--------------|--------------|
| 20108 | Patient108B2 | Patient191   |
| 20108 | Patient191   | Patient222D  |
| 20108 | Patient191   | Patient236A  |
| 20108 | Patient191   | Patient265   |
| 20108 | Patient246C  | Patient254   |
| 20109 | Patient099A  | Patient191   |
| 20109 | Patient191   | Patient252A  |
| 20110 | Patient022A  | Patient238   |
| 20110 | Patient069   | Patient258C1 |
| 20110 | Patient069   | Patient258C2 |
| 20110 | Patient191   | Patient201E  |
| 20110 | Patient191   | Patient218B  |
| 20110 | Patient191   | Patient222E  |
| 20110 | Patient191   | Patient252F  |
| 20111 | Patient099D  | Patient191   |
| 20111 | Patient191   | Patient196D  |
| 20111 | Patient246E  | Patient254   |
| 20112 | Patient029   | Patient056   |
| 20112 | Patient079A1 | Patient254   |
| 20112 | Patient108G  | Patient191   |
| 20112 | Patient109A  | Patient191   |
| 20112 | Patient127B  | Patient191   |
| 20112 | Patient184   | Patient191   |
| 20112 | Patient246D  | Patient254   |
| 20113 | Patient079A2 | Patient254   |
| 20113 | Patient079C  | Patient254   |
| 20113 | Patient099C  | Patient191   |
| 20113 | Patient108B1 | Patient191   |
| 20114 | Patient108D  | Patient191   |
| 20114 | Patient191   | Patient222F  |
| 20116 | Patient108G  | Patient254   |
| 20116 | Patient109C  | Patient191   |
| 20116 | Patient222B  | Patient254   |
| 20117 | Patient100A  | Patient254   |
| 20117 | Patient108H  | Patient191   |
| 20117 | Patient109A  | Patient254   |
| 20117 | Patient252D  | Patient254   |
| 20118 | Patient109D  | Patient191   |
| 20118 | Patient191   | Patient263B  |
| 20118 | Patient236B  | Patient254   |
| 20119 | Patient109B  | Patient191   |
| 20120 | Patient062   | Patient233   |
| 20120 | Patient108F  | Patient191   |
| 20120 | Patient196A  | Patient254   |
| 20121 | Patient109C  | Patient254   |
| 20121 | Patient149B  | Patient191   |
| 20121 | Patient196E  | Patient254   |
| 20122 | Patient108D  | Patient254   |
| 20122 | Patient108H  | Patient254   |
| 20122 | Patient109E  | Patient191   |

|       |             |              |
|-------|-------------|--------------|
| 20123 | Patient201B | Patient254   |
| 20124 | Patient109D | Patient254   |
| 20124 | Patient218A | Patient254   |
| 20125 | Patient062  | Patient152A  |
| 20125 | Patient109E | Patient254   |
| 20126 | Patient179  | Patient198   |
| 20127 | Patient062  | Patient152B  |
| 20127 | Patient097D | Patient254   |
| 20127 | Patient109B | Patient254   |
| 20127 | Patient196B | Patient254   |
| 20127 | Patient196C | Patient254   |
| 20127 | Patient254  | Patient265   |
| 20128 | Patient108F | Patient254   |
| 20128 | Patient236A | Patient254   |
| 20129 | Patient097A | Patient254   |
| 20129 | Patient127A | Patient254   |
| 20130 | Patient149A | Patient189C2 |
| 20131 | Patient097C | Patient254   |
| 20131 | Patient187  | Patient254   |
| 20131 | Patient191  | Patient246B  |
| 20131 | Patient222A | Patient254   |
| 20132 | Patient149A | Patient189C1 |
| 20133 | Patient097B | Patient254   |
| 20133 | Patient201A | Patient254   |
| 20133 | Patient218B | Patient254   |
| 20133 | Patient254  | Patient263B  |
| 20134 | Patient114  | Patient149A  |
| 20134 | Patient184  | Patient254   |
| 20135 | Patient180  | Patient198   |
| 20135 | Patient191  | Patient246C  |
| 20135 | Patient191  | Patient246E  |
| 20135 | Patient196D | Patient254   |
| 20136 | Patient097D | Patient191   |
| 20136 | Patient099B | Patient254   |
| 20136 | Patient127B | Patient254   |
| 20136 | Patient201E | Patient254   |
| 20137 | Patient099A | Patient254   |
| 20137 | Patient222D | Patient254   |
| 20137 | Patient222E | Patient254   |
| 20138 | Patient023  | Patient191   |
| 20139 | Patient097A | Patient191   |
| 20139 | Patient099D | Patient254   |
| 20139 | Patient222F | Patient254   |
| 20140 | Patient022A | Patient180   |
| 20140 | Patient149B | Patient254   |
| 20141 | Patient191  | Patient246D  |
| 20142 | Patient097B | Patient191   |
| 20142 | Patient097C | Patient191   |
| 20143 | Patient022A | Patient069   |
| 20143 | Patient097E | Patient254   |

|       |              |              |
|-------|--------------|--------------|
| 20143 | Patient099C  | Patient254   |
| 20147 | Patient022A  | Patient029   |
| 20149 | Patient097E  | Patient191   |
| 20155 | Patient021A2 | Patient191   |
| 20162 | Patient021A1 | Patient191   |
| 20162 | Patient179   | Patient254   |
| 20165 | Patient193   | Patient198   |
| 20166 | Patient021A2 | Patient254   |
| 20168 | Patient021A1 | Patient254   |
| 20173 | Patient180   | Patient254   |
| 20181 | Patient089A1 | Patient149A  |
| 20184 | Patient149A  | Patient193   |
| 20187 | Patient171   | Patient254   |
| 20195 | Patient088   | Patient149A  |
| 20196 | Patient056   | Patient215   |
| 20196 | Patient089A2 | Patient149A  |
| 20200 | Patient058   | Patient149A  |
| 20219 | Patient062   | Patient198   |
| 20232 | Patient058   | Patient254   |
| 20232 | Patient066B  | Patient215   |
| 20237 | Patient062   | Patient208   |
| 20238 | Patient089A1 | Patient254   |
| 20241 | Patient091B  | Patient215   |
| 20251 | Patient062   | Patient258C1 |
| 20252 | Patient062   | Patient258C2 |
| 20254 | Patient088   | Patient254   |
| 20258 | Patient089A2 | Patient254   |
| 20258 | Patient149A  | Patient171   |
| 20267 | Patient062   | Patient215   |
| 20282 | Patient215   | Patient254   |
| 20289 | Patient056   | Patient233   |
| 20292 | Patient152B  | Patient254   |
| 20293 | Patient056   | Patient152A  |
| 20295 | Patient056   | Patient152B  |
| 20295 | Patient056   | Patient198   |
| 20295 | Patient152A  | Patient254   |
| 20301 | Patient198   | Patient254   |
| 20308 | Patient201C  | Patient215   |
| 20310 | Patient149A  | Patient233   |
| 20311 | Patient201D  | Patient215   |
| 20313 | Patient149A  | Patient152A  |
| 20318 | Patient149A  | Patient152B  |
| 20318 | Patient149A  | Patient179   |
| 20330 | Patient056   | Patient258C1 |
| 20330 | Patient056   | Patient258C2 |
| 20333 | Patient149A  | Patient180   |
| 20334 | Patient149A  | Patient198   |
| 20335 | Patient056   | Patient208   |
| 20347 | Patient066B  | Patient258C1 |
| 20347 | Patient066B  | Patient258C2 |

|       |             |              |
|-------|-------------|--------------|
| 20349 | Patient233  | Patient254   |
| 20357 | Patient091B | Patient258C1 |
| 20357 | Patient091B | Patient258C2 |
| 20366 | Patient005  | Patient233   |
| 20366 | Patient066B | Patient233   |
| 20368 | Patient091B | Patient233   |
| 20368 | Patient254  | Patient258C1 |
| 20368 | Patient254  | Patient258C2 |
| 20374 | Patient149A | Patient215   |
| 20390 | Patient091B | Patient208   |
| 20391 | Patient005  | Patient152A  |
| 20392 | Patient005  | Patient152B  |
| 20399 | Patient005  | Patient208   |
| 20405 | Patient191  | Patient215   |
| 20417 | Patient201C | Patient208   |
| 20420 | Patient201D | Patient208   |
| 20430 | Patient005  | Patient215   |
| 20430 | Patient066B | Patient152A  |
| 20431 | Patient066B | Patient152B  |
| 20431 | Patient201C | Patient258C1 |
| 20431 | Patient201C | Patient258C2 |
| 20434 | Patient005  | Patient258C1 |
| 20434 | Patient005  | Patient258C2 |
| 20434 | Patient066B | Patient208   |
| 20434 | Patient201C | Patient233   |
| 20434 | Patient201D | Patient258C1 |
| 20434 | Patient201D | Patient258C2 |
| 20437 | Patient066B | Patient198   |
| 20437 | Patient091B | Patient152A  |
| 20437 | Patient201D | Patient233   |
| 20438 | Patient091B | Patient152B  |
| 20445 | Patient072  | Patient189C1 |
| 20445 | Patient072  | Patient189C2 |
| 20446 | Patient091B | Patient198   |
| 20448 | Patient152B | Patient191   |
| 20452 | Patient152A | Patient191   |
| 20453 | Patient191  | Patient258C1 |
| 20453 | Patient191  | Patient258C2 |
| 20457 | Patient152A | Patient201C  |
| 20457 | Patient198  | Patient201C  |
| 20458 | Patient152B | Patient201C  |
| 20459 | Patient191  | Patient233   |
| 20460 | Patient152A | Patient201D  |
| 20460 | Patient198  | Patient201D  |
| 20461 | Patient152B | Patient201D  |
| 20474 | Patient191  | Patient198   |
| 20493 | Patient072  | Patient171   |
| 20502 | Patient072  | Patient193   |
| 20503 | Patient058  | Patient072   |
| 20503 | Patient072  | Patient100B  |

|       |              |              |
|-------|--------------|--------------|
| 20509 | Patient005   | Patient198   |
| 20510 | Patient072   | Patient238   |
| 20512 | Patient069   | Patient072   |
| 20513 | Patient072   | Patient114   |
| 20515 | Patient072   | Patient179   |
| 20518 | Patient029   | Patient072   |
| 20521 | Patient072   | Patient089A1 |
| 20523 | Patient072   | Patient180   |
| 20529 | Patient092C  | Patient114   |
| 20534 | Patient072   | Patient088   |
| 20536 | Patient072   | Patient089A2 |
| 20540 | Patient092C  | Patient193   |
| 20549 | Patient022A  | Patient215   |
| 20559 | Patient149A  | Patient258C1 |
| 20559 | Patient149A  | Patient258C2 |
| 20561 | Patient032D  | Patient114   |
| 20566 | Patient191   | Patient208   |
| 20567 | Patient032D  | Patient193   |
| 20567 | Patient208   | Patient254   |
| 20568 | Patient092C  | Patient189C2 |
| 20571 | Patient022A  | Patient152B  |
| 20573 | Patient158   | Patient189C1 |
| 20574 | Patient092C  | Patient189C1 |
| 20574 | Patient158   | Patient189C2 |
| 20575 | Patient022A  | Patient152A  |
| 20575 | Patient055   | Patient189C1 |
| 20575 | Patient055   | Patient189C2 |
| 20576 | Patient092C  | Patient238   |
| 20576 | Patient189C1 | Patient194   |
| 20577 | Patient022A  | Patient198   |
| 20577 | Patient189C2 | Patient194   |
| 20583 | Patient149A  | Patient208   |
| 20589 | Patient092C  | Patient100B  |
| 20595 | Patient069   | Patient092C  |
| 20595 | Patient189C1 | Patient210   |
| 20596 | Patient032D  | Patient100B  |
| 20596 | Patient189C2 | Patient210   |
| 20600 | Patient031   | Patient189C1 |
| 20600 | Patient031   | Patient189C2 |
| 20607 | Patient022A  | Patient233   |
| 20608 | Patient032D  | Patient238   |
| 20613 | Patient022A  | Patient258C1 |
| 20613 | Patient022A  | Patient258C2 |
| 20613 | Patient032D  | Patient069   |
| 20616 | Patient022A  | Patient208   |
| 20617 | Patient029   | Patient092C  |
| 20622 | Patient055   | Patient114   |
| 20626 | Patient066A  | Patient189C1 |
| 20626 | Patient133   | Patient189C1 |
| 20626 | Patient133   | Patient189C2 |



|       |              |              |
|-------|--------------|--------------|
| 20627 | Patient013   | Patient114   |
| 20627 | Patient066A  | Patient189C2 |
| 20628 | Patient092D  | Patient114   |
| 20630 | Patient028   | Patient189C1 |
| 20631 | Patient028   | Patient189C2 |
| 20631 | Patient031   | Patient089A1 |
| 20632 | Patient031   | Patient100B  |
| 20632 | Patient093E  | Patient189C1 |
| 20633 | Patient092D  | Patient193   |
| 20633 | Patient093A  | Patient189C1 |
| 20633 | Patient093E  | Patient189C2 |
| 20634 | Patient092C  | Patient171   |
| 20635 | Patient093A  | Patient189C2 |
| 20635 | Patient094A  | Patient189C1 |
| 20635 | Patient189C1 | Patient204   |
| 20636 | Patient093D  | Patient189C1 |
| 20636 | Patient094A  | Patient189C2 |
| 20636 | Patient189C2 | Patient204   |
| 20637 | Patient031   | Patient058   |
| 20637 | Patient093D  | Patient189C2 |
| 20638 | Patient094B  | Patient189C1 |
| 20638 | Patient094C  | Patient189C1 |
| 20639 | Patient029   | Patient032D  |
| 20639 | Patient094B  | Patient189C2 |
| 20639 | Patient094C  | Patient189C2 |
| 20642 | Patient031   | Patient088   |
| 20643 | Patient031   | Patient114   |
| 20645 | Patient031   | Patient179   |
| 20646 | Patient031   | Patient089A2 |
| 20647 | Patient091A  | Patient189C1 |
| 20648 | Patient031   | Patient171   |
| 20648 | Patient091A  | Patient189C2 |
| 20649 | Patient054   | Patient189C1 |
| 20649 | Patient167   | Patient189C1 |
| 20649 | Patient167   | Patient189C2 |
| 20650 | Patient054   | Patient189C2 |
| 20651 | Patient145B  | Patient189C2 |
| 20652 | Patient032D  | Patient189C2 |
| 20652 | Patient145B  | Patient189C1 |
| 20654 | Patient031   | Patient238   |
| 20657 | Patient031   | Patient193   |
| 20657 | Patient032D  | Patient189C1 |
| 20659 | Patient090   | Patient189C1 |
| 20659 | Patient090   | Patient189C2 |
| 20661 | Patient092D  | Patient189C2 |
| 20663 | Patient141G  | Patient189C1 |
| 20663 | Patient141G  | Patient189C2 |
| 20663 | Patient189C1 | Patient205   |
| 20664 | Patient183A  | Patient189C2 |
| 20664 | Patient189C2 | Patient205   |

|       |              |              |
|-------|--------------|--------------|
| 20665 | Patient183A  | Patient189C1 |
| 20667 | Patient092D  | Patient189C1 |
| 20668 | Patient093C  | Patient189C1 |
| 20669 | Patient092D  | Patient238   |
| 20669 | Patient093C  | Patient189C2 |
| 20670 | Patient183D  | Patient189C2 |
| 20672 | Patient141F  | Patient189C2 |
| 20672 | Patient183D  | Patient189C1 |
| 20673 | Patient189C2 | Patient261E  |
| 20674 | Patient141F  | Patient189C1 |
| 20674 | Patient189C1 | Patient261E  |
| 20677 | Patient189C2 | Patient261C  |
| 20678 | Patient013   | Patient193   |
| 20678 | Patient032E  | Patient189C2 |
| 20678 | Patient189C1 | Patient261C  |
| 20679 | Patient032E  | Patient189C1 |
| 20679 | Patient033   | Patient189C1 |
| 20679 | Patient183B  | Patient189C2 |
| 20680 | Patient183B  | Patient189C1 |
| 20681 | Patient013   | Patient100B  |
| 20681 | Patient032C  | Patient189C2 |
| 20681 | Patient033   | Patient189C2 |
| 20682 | Patient032C  | Patient189C1 |
| 20682 | Patient189C1 | Patient230C  |
| 20682 | Patient189C2 | Patient230C  |
| 20683 | Patient183E  | Patient189C2 |
| 20684 | Patient089A1 | Patient258F  |
| 20684 | Patient183E  | Patient189C1 |
| 20685 | Patient055   | Patient171   |
| 20685 | Patient183C  | Patient189C2 |
| 20686 | Patient092D  | Patient100B  |
| 20686 | Patient183C  | Patient189C1 |
| 20686 | Patient189C1 | Patient230G  |
| 20686 | Patient189C2 | Patient230G  |
| 20686 | Patient189C2 | Patient261G  |
| 20687 | Patient055   | Patient193   |
| 20687 | Patient069   | Patient092D  |
| 20687 | Patient089A1 | Patient258A2 |
| 20687 | Patient089A1 | Patient258B  |
| 20687 | Patient093B  | Patient189C1 |
| 20687 | Patient189C1 | Patient261G  |
| 20688 | Patient093B  | Patient189C2 |
| 20689 | Patient089A1 | Patient258A1 |
| 20690 | Patient038   | Patient189C1 |
| 20690 | Patient094D  | Patient189C1 |
| 20691 | Patient038   | Patient189C2 |
| 20691 | Patient089A1 | Patient258D  |
| 20691 | Patient094D  | Patient189C2 |
| 20692 | Patient055   | Patient058   |
| 20692 | Patient089A1 | Patient258G  |

|       |              |              |
|-------|--------------|--------------|
| 20694 | Patient126E  | Patient189C1 |
| 20695 | Patient126E  | Patient189C2 |
| 20696 | Patient013   | Patient238   |
| 20699 | Patient053A1 | Patient100B  |
| 20699 | Patient094E  | Patient189C1 |
| 20700 | Patient029   | Patient031   |
| 20700 | Patient055   | Patient100B  |
| 20700 | Patient094E  | Patient189C2 |
| 20701 | Patient013   | Patient069   |
| 20701 | Patient028   | Patient114   |
| 20701 | Patient072   | Patient215   |
| 20704 | Patient075   | Patient189C1 |
| 20705 | Patient075   | Patient189C2 |
| 20705 | Patient089A2 | Patient258F  |
| 20706 | Patient013   | Patient029   |
| 20706 | Patient031   | Patient180   |
| 20706 | Patient058   | Patient258F  |
| 20706 | Patient146   | Patient189C1 |
| 20706 | Patient189C2 | Patient251   |
| 20707 | Patient146   | Patient189C2 |
| 20708 | Patient058   | Patient258A1 |
| 20708 | Patient176   | Patient189C1 |
| 20708 | Patient176   | Patient189C2 |
| 20708 | Patient189C1 | Patient232D  |
| 20708 | Patient189C1 | Patient232E  |
| 20708 | Patient189C1 | Patient251   |
| 20709 | Patient058   | Patient258A2 |
| 20709 | Patient058   | Patient258B  |
| 20709 | Patient088   | Patient258F  |
| 20709 | Patient089A2 | Patient258A2 |
| 20709 | Patient089A2 | Patient258B  |
| 20709 | Patient189C2 | Patient232D  |
| 20709 | Patient189C2 | Patient232E  |
| 20710 | Patient089A2 | Patient258A1 |
| 20710 | Patient189C1 | Patient232A  |
| 20711 | Patient029   | Patient092D  |
| 20711 | Patient032D  | Patient171   |
| 20711 | Patient053A1 | Patient114   |
| 20711 | Patient189C1 | Patient232B  |
| 20711 | Patient189C2 | Patient232A  |
| 20712 | Patient189C2 | Patient232B  |
| 20713 | Patient028   | Patient171   |
| 20713 | Patient058   | Patient258D  |
| 20713 | Patient088   | Patient258A1 |
| 20713 | Patient088   | Patient258A2 |
| 20713 | Patient088   | Patient258B  |
| 20713 | Patient089A2 | Patient258D  |
| 20713 | Patient189C1 | Patient232C  |
| 20714 | Patient058   | Patient258G  |
| 20714 | Patient089A2 | Patient258G  |

|       |              |              |
|-------|--------------|--------------|
| 20714 | Patient189C2 | Patient232C  |
| 20717 | Patient088   | Patient258D  |
| 20718 | Patient088   | Patient258G  |
| 20719 | Patient053A1 | Patient193   |
| 20719 | Patient146   | Patient171   |
| 20720 | Patient053A1 | Patient238   |
| 20721 | Patient055   | Patient179   |
| 20723 | Patient028   | Patient089A1 |
| 20723 | Patient028   | Patient100B  |
| 20724 | Patient114   | Patient146   |
| 20725 | Patient114   | Patient222C  |
| 20726 | Patient028   | Patient029   |
| 20726 | Patient031   | Patient069   |
| 20728 | Patient055   | Patient089A1 |
| 20729 | Patient055   | Patient089A2 |
| 20729 | Patient133   | Patient171   |
| 20729 | Patient171   | Patient258F  |
| 20731 | Patient092D  | Patient171   |
| 20732 | Patient055   | Patient088   |
| 20732 | Patient114   | Patient196F  |
| 20732 | Patient171   | Patient258A1 |
| 20732 | Patient171   | Patient258A2 |
| 20732 | Patient171   | Patient258B  |
| 20733 | Patient028   | Patient193   |
| 20733 | Patient089A1 | Patient092C  |
| 20733 | Patient114   | Patient194   |
| 20734 | Patient053A1 | Patient069   |
| 20734 | Patient114   | Patient263A  |
| 20734 | Patient177   | Patient189C2 |
| 20735 | Patient177   | Patient189C1 |
| 20736 | Patient028   | Patient069   |
| 20736 | Patient028   | Patient179   |
| 20736 | Patient171   | Patient258D  |
| 20737 | Patient058   | Patient146   |
| 20737 | Patient090   | Patient171   |
| 20737 | Patient171   | Patient258G  |
| 20738 | Patient028   | Patient088   |
| 20738 | Patient028   | Patient238   |
| 20738 | Patient066A  | Patient171   |
| 20738 | Patient189C1 | Patient207   |
| 20738 | Patient189C2 | Patient207   |
| 20739 | Patient028   | Patient089A2 |
| 20740 | Patient089A1 | Patient146   |
| 20742 | Patient072   | Patient152B  |
| 20743 | Patient028   | Patient180   |
| 20743 | Patient033   | Patient058   |
| 20743 | Patient072   | Patient152A  |
| 20743 | Patient091A  | Patient171   |
| 20743 | Patient128   | Patient189C1 |
| 20743 | Patient146   | Patient193   |

|       |              |              |
|-------|--------------|--------------|
| 20744 | Patient072   | Patient198   |
| 20744 | Patient128   | Patient189C2 |
| 20744 | Patient171   | Patient251   |
| 20746 | Patient075   | Patient171   |
| 20747 | Patient033   | Patient089A1 |
| 20747 | Patient145B  | Patient171   |
| 20747 | Patient171   | Patient261G  |
| 20748 | Patient090   | Patient238   |
| 20748 | Patient141G  | Patient171   |
| 20748 | Patient167   | Patient171   |
| 20749 | Patient007A  | Patient058   |
| 20749 | Patient028   | Patient058   |
| 20749 | Patient146   | Patient179   |
| 20750 | Patient058   | Patient092C  |
| 20750 | Patient086C  | Patient238   |
| 20751 | Patient075   | Patient114   |
| 20753 | Patient007B  | Patient058   |
| 20753 | Patient013   | Patient189C2 |
| 20753 | Patient066A  | Patient179   |
| 20753 | Patient088   | Patient092C  |
| 20754 | Patient022B  | Patient189C1 |
| 20754 | Patient022B  | Patient189C2 |
| 20754 | Patient066A  | Patient114   |
| 20754 | Patient069   | Patient090   |
| 20755 | Patient033   | Patient069   |
| 20755 | Patient100B  | Patient210   |
| 20755 | Patient193   | Patient222C  |
| 20756 | Patient055   | Patient238   |
| 20756 | Patient089A2 | Patient092C  |
| 20756 | Patient090   | Patient179   |
| 20756 | Patient114   | Patient158   |
| 20757 | Patient013   | Patient189C1 |
| 20757 | Patient029   | Patient053A1 |
| 20757 | Patient114   | Patient133   |
| 20758 | Patient007A  | Patient089A1 |
| 20758 | Patient007B  | Patient089A1 |
| 20758 | Patient089A1 | Patient133   |
| 20759 | Patient158   | Patient171   |
| 20760 | Patient075   | Patient089A1 |
| 20760 | Patient086A  | Patient238   |
| 20760 | Patient100B  | Patient251   |
| 20760 | Patient141F  | Patient171   |
| 20760 | Patient171   | Patient210   |
| 20761 | Patient066A  | Patient238   |
| 20761 | Patient089A1 | Patient251   |
| 20761 | Patient114   | Patient164   |
| 20762 | Patient066A  | Patient180   |
| 20762 | Patient086B  | Patient238   |
| 20762 | Patient086E  | Patient238   |
| 20762 | Patient171   | Patient194   |

|       |              |              |
|-------|--------------|--------------|
| 20762 | Patient193   | Patient196F  |
| 20763 | Patient072   | Patient258C1 |
| 20763 | Patient072   | Patient258C2 |
| 20763 | Patient089A2 | Patient146   |
| 20763 | Patient100B  | Patient146   |
| 20763 | Patient100B  | Patient222C  |
| 20764 | Patient075   | Patient193   |
| 20764 | Patient090   | Patient180   |
| 20764 | Patient091A  | Patient114   |
| 20764 | Patient133   | Patient193   |
| 20764 | Patient238   | Patient251   |
| 20765 | Patient066A  | Patient069   |
| 20765 | Patient089A1 | Patient158   |
| 20766 | Patient058   | Patient075   |
| 20766 | Patient066A  | Patient089A1 |
| 20766 | Patient088   | Patient146   |
| 20766 | Patient114   | Patient210   |
| 20766 | Patient179   | Patient210   |
| 20766 | Patient193   | Patient263A  |
| 20767 | Patient114   | Patient251   |
| 20767 | Patient171   | Patient261E  |
| 20767 | Patient210   | Patient238   |
| 20768 | Patient029   | Patient222C  |
| 20768 | Patient072   | Patient233   |
| 20768 | Patient171   | Patient230C  |
| 20770 | Patient069   | Patient086C  |
| 20770 | Patient081C  | Patient089A1 |
| 20770 | Patient100B  | Patient196F  |
| 20770 | Patient193   | Patient251   |
| 20771 | Patient029   | Patient210   |
| 20771 | Patient033   | Patient088   |
| 20771 | Patient069   | Patient251   |
| 20771 | Patient089A1 | Patient090   |
| 20771 | Patient164   | Patient189C1 |
| 20771 | Patient164   | Patient189C2 |
| 20771 | Patient171   | Patient230G  |
| 20772 | Patient029   | Patient066A  |
| 20772 | Patient033   | Patient089A2 |
| 20772 | Patient164   | Patient193   |
| 20772 | Patient171   | Patient261C  |
| 20773 | Patient089A1 | Patient261G  |
| 20773 | Patient100B  | Patient194   |
| 20773 | Patient179   | Patient251   |
| 20774 | Patient066A  | Patient088   |
| 20774 | Patient066A  | Patient193   |
| 20774 | Patient100B  | Patient263A  |
| 20775 | Patient007A  | Patient089A2 |
| 20775 | Patient032D  | Patient089A1 |
| 20775 | Patient069   | Patient210   |
| 20775 | Patient089A1 | Patient145B  |

|       |              |              |
|-------|--------------|--------------|
| 20775 | Patient114   | Patient145B  |
| 20776 | Patient029   | Patient090   |
| 20776 | Patient075   | Patient088   |
| 20776 | Patient086C  | Patient100B  |
| 20776 | Patient114   | Patient167   |
| 20776 | Patient180   | Patient210   |
| 20777 | Patient032E  | Patient171   |
| 20777 | Patient069   | Patient222C  |
| 20777 | Patient089A1 | Patient141G  |
| 20777 | Patient089A1 | Patient167   |
| 20777 | Patient090   | Patient114   |
| 20777 | Patient091A  | Patient100B  |
| 20777 | Patient114   | Patient141G  |
| 20777 | Patient114   | Patient261G  |
| 20778 | Patient029   | Patient086C  |
| 20778 | Patient029   | Patient196F  |
| 20778 | Patient069   | Patient086A  |
| 20778 | Patient088   | Patient158   |
| 20779 | Patient007A  | Patient088   |
| 20779 | Patient007B  | Patient089A2 |
| 20779 | Patient029   | Patient251   |
| 20779 | Patient029   | Patient263A  |
| 20779 | Patient058   | Patient133   |
| 20779 | Patient091A  | Patient193   |
| 20779 | Patient238   | Patient258F  |
| 20780 | Patient066A  | Patient089A2 |
| 20780 | Patient069   | Patient086B  |
| 20780 | Patient069   | Patient086E  |
| 20780 | Patient081D  | Patient089A1 |
| 20780 | Patient090   | Patient100B  |
| 20781 | Patient032C  | Patient171   |
| 20781 | Patient088   | Patient133   |
| 20781 | Patient089A2 | Patient133   |
| 20781 | Patient089A2 | Patient158   |
| 20781 | Patient091A  | Patient179   |
| 20781 | Patient145B  | Patient193   |
| 20781 | Patient158   | Patient193   |
| 20781 | Patient167   | Patient193   |
| 20781 | Patient171   | Patient183A  |
| 20781 | Patient193   | Patient261G  |
| 20781 | Patient222C  | Patient238   |
| 20782 | Patient069   | Patient196F  |
| 20782 | Patient090   | Patient193   |
| 20782 | Patient180   | Patient251   |
| 20783 | Patient007B  | Patient088   |
| 20783 | Patient089A2 | Patient251   |
| 20783 | Patient238   | Patient258A1 |
| 20783 | Patient238   | Patient258A2 |
| 20783 | Patient238   | Patient258B  |
| 20784 | Patient058   | Patient091A  |

|       |              |              |
|-------|--------------|--------------|
| 20784 | Patient075   | Patient089A2 |
| 20785 | Patient088   | Patient251   |
| 20785 | Patient089A1 | Patient141F  |
| 20785 | Patient141G  | Patient193   |
| 20786 | Patient058   | Patient251   |
| 20786 | Patient069   | Patient091A  |
| 20786 | Patient075   | Patient179   |
| 20786 | Patient086A  | Patient100B  |
| 20787 | Patient066A  | Patient100B  |
| 20787 | Patient089A1 | Patient210   |
| 20787 | Patient114   | Patient141F  |
| 20787 | Patient171   | Patient183D  |
| 20787 | Patient238   | Patient258D  |
| 20788 | Patient029   | Patient086A  |
| 20788 | Patient058   | Patient081C  |
| 20788 | Patient069   | Patient263A  |
| 20788 | Patient086B  | Patient100B  |
| 20788 | Patient086E  | Patient100B  |
| 20788 | Patient089A1 | Patient091A  |
| 20788 | Patient238   | Patient258G  |
| 20789 | Patient055   | Patient180   |
| 20789 | Patient058   | Patient090   |
| 20789 | Patient092C  | Patient180   |
| 20790 | Patient029   | Patient086B  |
| 20790 | Patient029   | Patient086E  |
| 20790 | Patient032D  | Patient058   |
| 20790 | Patient055   | Patient069   |
| 20790 | Patient081C  | Patient088   |
| 20790 | Patient081C  | Patient089A2 |
| 20790 | Patient100B  | Patient258F  |
| 20790 | Patient196F  | Patient238   |
| 20791 | Patient038   | Patient171   |
| 20791 | Patient058   | Patient158   |
| 20791 | Patient088   | Patient090   |
| 20791 | Patient092C  | Patient179   |
| 20791 | Patient141F  | Patient193   |
| 20792 | Patient089A2 | Patient090   |
| 20792 | Patient193   | Patient210   |
| 20793 | Patient100B  | Patient258A1 |
| 20793 | Patient238   | Patient263A  |
| 20794 | Patient058   | Patient066A  |
| 20794 | Patient058   | Patient167   |
| 20794 | Patient058   | Patient261G  |
| 20794 | Patient072   | Patient208   |
| 20794 | Patient089A2 | Patient261G  |
| 20794 | Patient100B  | Patient258A2 |
| 20794 | Patient100B  | Patient258B  |
| 20794 | Patient158   | Patient238   |
| 20795 | Patient029   | Patient055   |
| 20795 | Patient029   | Patient091A  |



|       |              |              |
|-------|--------------|--------------|
| 20795 | Patient171   | Patient183B  |
| 20796 | Patient029   | Patient158   |
| 20796 | Patient058   | Patient145B  |
| 20796 | Patient088   | Patient261G  |
| 20796 | Patient089A1 | Patient230C  |
| 20796 | Patient089A1 | Patient261E  |
| 20796 | Patient189C2 | Patient247D  |
| 20797 | Patient032D  | Patient089A2 |
| 20797 | Patient088   | Patient210   |
| 20797 | Patient114   | Patient230C  |
| 20798 | Patient058   | Patient081D  |
| 20798 | Patient058   | Patient141G  |
| 20798 | Patient089A1 | Patient261C  |
| 20798 | Patient089A2 | Patient141G  |
| 20798 | Patient089A2 | Patient145B  |
| 20798 | Patient100B  | Patient258D  |
| 20798 | Patient114   | Patient261E  |
| 20799 | Patient091A  | Patient180   |
| 20799 | Patient100B  | Patient258G  |
| 20799 | Patient171   | Patient183E  |
| 20799 | Patient189C1 | Patient247D  |
| 20800 | Patient032D  | Patient088   |
| 20800 | Patient081D  | Patient088   |
| 20800 | Patient081D  | Patient089A2 |
| 20800 | Patient088   | Patient141G  |
| 20800 | Patient088   | Patient145B  |
| 20800 | Patient088   | Patient167   |
| 20800 | Patient089A2 | Patient167   |
| 20800 | Patient091A  | Patient238   |
| 20800 | Patient114   | Patient230G  |
| 20801 | Patient007A  | Patient100B  |
| 20801 | Patient029   | Patient194   |
| 20801 | Patient093E  | Patient114   |
| 20801 | Patient104A  | Patient189C2 |
| 20801 | Patient104B  | Patient189C2 |
| 20801 | Patient114   | Patient204   |
| 20801 | Patient114   | Patient261C  |
| 20801 | Patient171   | Patient183C  |
| 20802 | Patient089A1 | Patient230G  |
| 20802 | Patient089A2 | Patient210   |
| 20802 | Patient104A  | Patient114   |
| 20802 | Patient104B  | Patient114   |
| 20802 | Patient114   | Patient128   |
| 20802 | Patient193   | Patient194   |
| 20803 | Patient032E  | Patient089A1 |
| 20803 | Patient054   | Patient114   |
| 20803 | Patient093A  | Patient114   |
| 20803 | Patient100B  | Patient133   |
| 20803 | Patient114   | Patient145A  |
| 20803 | Patient193   | Patient261E  |

|       |              |              |
|-------|--------------|--------------|
| 20803 | Patient194   | Patient238   |
| 20804 | Patient053A1 | Patient189C2 |
| 20804 | Patient069   | Patient194   |
| 20804 | Patient094A  | Patient114   |
| 20804 | Patient104A  | Patient189C1 |
| 20804 | Patient104B  | Patient189C1 |
| 20804 | Patient133   | Patient238   |
| 20804 | Patient183A  | Patient238   |
| 20804 | Patient193   | Patient230C  |
| 20805 | Patient007B  | Patient100B  |
| 20805 | Patient032E  | Patient114   |
| 20805 | Patient075   | Patient100B  |
| 20805 | Patient158   | Patient179   |
| 20805 | Patient171   | Patient176   |
| 20805 | Patient179   | Patient194   |
| 20806 | Patient029   | Patient258F  |
| 20806 | Patient045A  | Patient089A1 |
| 20806 | Patient069   | Patient158   |
| 20806 | Patient089A1 | Patient164   |
| 20806 | Patient089A2 | Patient091A  |
| 20806 | Patient093D  | Patient114   |
| 20806 | Patient189C2 | Patient202   |
| 20806 | Patient189C2 | Patient247C  |
| 20807 | Patient026D  | Patient089A1 |
| 20807 | Patient032C  | Patient089A1 |
| 20807 | Patient032C  | Patient114   |
| 20807 | Patient045B  | Patient089A1 |
| 20807 | Patient058   | Patient194   |
| 20807 | Patient094B  | Patient114   |
| 20807 | Patient189C2 | Patient246A  |
| 20807 | Patient193   | Patient230G  |
| 20807 | Patient193   | Patient261C  |
| 20808 | Patient058   | Patient141F  |
| 20808 | Patient089A2 | Patient141F  |
| 20808 | Patient094C  | Patient114   |
| 20808 | Patient157   | Patient189C2 |
| 20808 | Patient189C1 | Patient247C  |
| 20809 | Patient026E  | Patient089A1 |
| 20809 | Patient045C  | Patient089A1 |
| 20809 | Patient053A1 | Patient189C1 |
| 20809 | Patient093E  | Patient171   |
| 20809 | Patient114   | Patient145C  |
| 20809 | Patient189C2 | Patient247A  |
| 20809 | Patient189C2 | Patient247B  |
| 20810 | Patient088   | Patient141F  |
| 20810 | Patient145A  | Patient193   |
| 20810 | Patient189C1 | Patient246A  |
| 20811 | Patient032E  | Patient193   |
| 20811 | Patient093A  | Patient171   |
| 20811 | Patient146   | Patient238   |

|       |              |              |
|-------|--------------|--------------|
| 20811 | Patient157   | Patient189C1 |
| 20811 | Patient189C1 | Patient202   |
| 20812 | Patient029   | Patient258A1 |
| 20812 | Patient029   | Patient258A2 |
| 20812 | Patient029   | Patient258B  |
| 20812 | Patient053A1 | Patient171   |
| 20812 | Patient058   | Patient210   |
| 20812 | Patient114   | Patient247D  |
| 20812 | Patient158   | Patient180   |
| 20812 | Patient183D  | Patient238   |
| 20812 | Patient189C1 | Patient247A  |
| 20812 | Patient189C1 | Patient247B  |
| 20813 | Patient088   | Patient091A  |
| 20813 | Patient094A  | Patient171   |
| 20814 | Patient089A1 | Patient194   |
| 20814 | Patient093D  | Patient171   |
| 20814 | Patient100B  | Patient258E  |
| 20815 | Patient007A  | Patient171   |
| 20815 | Patient032C  | Patient193   |
| 20815 | Patient058   | Patient261E  |
| 20815 | Patient100B  | Patient158   |
| 20815 | Patient114   | Patient141D  |
| 20815 | Patient145C  | Patient193   |
| 20815 | Patient189C2 | Patient247E  |
| 20816 | Patient029   | Patient258D  |
| 20816 | Patient089A1 | Patient093E  |
| 20816 | Patient094B  | Patient171   |
| 20816 | Patient167   | Patient238   |
| 20816 | Patient179   | Patient183A  |
| 20817 | Patient029   | Patient258G  |
| 20817 | Patient089A1 | Patient093A  |
| 20817 | Patient094C  | Patient171   |
| 20817 | Patient189C2 | Patient222C  |
| 20818 | Patient069   | Patient133   |
| 20818 | Patient114   | Patient261A  |
| 20818 | Patient141D  | Patient193   |
| 20818 | Patient189C1 | Patient206   |
| 20818 | Patient189C1 | Patient247E  |
| 20818 | Patient189C2 | Patient206   |
| 20819 | Patient007B  | Patient171   |
| 20819 | Patient058   | Patient261C  |
| 20819 | Patient088   | Patient261E  |
| 20819 | Patient089A1 | Patient094A  |
| 20819 | Patient089A2 | Patient230C  |
| 20819 | Patient089A2 | Patient261E  |
| 20819 | Patient100B  | Patient145B  |
| 20819 | Patient100B  | Patient261G  |
| 20819 | Patient183B  | Patient238   |
| 20820 | Patient058   | Patient230C  |
| 20820 | Patient089A1 | Patient093D  |

|       |              |              |
|-------|--------------|--------------|
| 20820 | Patient089A1 | Patient161B  |
| 20820 | Patient114   | Patient247C  |
| 20820 | Patient189C1 | Patient222C  |
| 20820 | Patient238   | Patient258E  |
| 20821 | Patient033   | Patient179   |
| 20821 | Patient088   | Patient230C  |
| 20821 | Patient089A2 | Patient261C  |
| 20821 | Patient100B  | Patient167   |
| 20821 | Patient133   | Patient180   |
| 20821 | Patient145B  | Patient238   |
| 20821 | Patient179   | Patient183D  |
| 20821 | Patient238   | Patient261G  |
| 20822 | Patient058   | Patient230G  |
| 20822 | Patient069   | Patient241   |
| 20822 | Patient086C  | Patient114   |
| 20822 | Patient089A1 | Patient094B  |
| 20822 | Patient089A1 | Patient183D  |
| 20822 | Patient114   | Patient246A  |
| 20822 | Patient114   | Patient247B  |
| 20822 | Patient180   | Patient183A  |
| 20822 | Patient180   | Patient194   |
| 20823 | Patient081C  | Patient171   |
| 20823 | Patient088   | Patient261C  |
| 20823 | Patient089A1 | Patient094C  |
| 20823 | Patient100B  | Patient141G  |
| 20823 | Patient114   | Patient247A  |
| 20823 | Patient123A  | Patient193   |
| 20823 | Patient183E  | Patient238   |
| 20824 | Patient033   | Patient238   |
| 20824 | Patient069   | Patient183A  |
| 20824 | Patient088   | Patient230G  |
| 20824 | Patient089A2 | Patient230G  |
| 20824 | Patient100B  | Patient207   |
| 20824 | Patient114   | Patient123A  |
| 20824 | Patient114   | Patient157   |
| 20824 | Patient123C  | Patient193   |
| 20824 | Patient189C2 | Patient196F  |
| 20824 | Patient193   | Patient261A  |
| 20825 | Patient013   | Patient152B  |
| 20825 | Patient038   | Patient114   |
| 20825 | Patient058   | Patient164   |
| 20825 | Patient114   | Patient123C  |
| 20825 | Patient183C  | Patient238   |
| 20826 | Patient013   | Patient152A  |
| 20826 | Patient029   | Patient133   |
| 20826 | Patient032E  | Patient058   |
| 20826 | Patient032E  | Patient089A2 |
| 20826 | Patient114   | Patient183A  |
| 20826 | Patient114   | Patient247E  |
| 20826 | Patient123B  | Patient193   |

|       |              |              |
|-------|--------------|--------------|
| 20827 | Patient032B  | Patient114   |
| 20827 | Patient034C  | Patient114   |
| 20827 | Patient086C  | Patient193   |
| 20827 | Patient089A1 | Patient183A  |
| 20827 | Patient114   | Patient123B  |
| 20827 | Patient114   | Patient261B  |
| 20827 | Patient141G  | Patient238   |
| 20827 | Patient171   | Patient204   |
| 20827 | Patient183A  | Patient193   |
| 20827 | Patient189C1 | Patient196F  |
| 20827 | Patient189C2 | Patient263A  |
| 20828 | Patient032A  | Patient114   |
| 20828 | Patient032E  | Patient088   |
| 20828 | Patient034A  | Patient114   |
| 20828 | Patient045A  | Patient058   |
| 20828 | Patient092G  | Patient114   |
| 20828 | Patient123D  | Patient193   |
| 20828 | Patient180   | Patient183D  |
| 20829 | Patient045A  | Patient089A2 |
| 20829 | Patient088   | Patient093E  |
| 20829 | Patient088   | Patient164   |
| 20829 | Patient089A2 | Patient164   |
| 20829 | Patient114   | Patient123D  |
| 20830 | Patient026D  | Patient089A2 |
| 20830 | Patient026D  | Patient171   |
| 20830 | Patient032C  | Patient058   |
| 20830 | Patient032C  | Patient088   |
| 20830 | Patient032C  | Patient089A2 |
| 20830 | Patient038   | Patient089A1 |
| 20830 | Patient045A  | Patient088   |
| 20830 | Patient045B  | Patient089A2 |
| 20830 | Patient069   | Patient183D  |
| 20830 | Patient088   | Patient093A  |
| 20830 | Patient089A2 | Patient093E  |
| 20830 | Patient092H  | Patient114   |
| 20830 | Patient104B  | Patient193   |
| 20830 | Patient114   | Patient205   |
| 20830 | Patient133   | Patient179   |
| 20830 | Patient189C1 | Patient263A  |
| 20831 | Patient045B  | Patient058   |
| 20831 | Patient089A1 | Patient183B  |
| 20831 | Patient089A2 | Patient093A  |
| 20831 | Patient104A  | Patient193   |
| 20831 | Patient114   | Patient183D  |
| 20831 | Patient114   | Patient261D  |
| 20831 | Patient146   | Patient180   |
| 20831 | Patient179   | Patient183B  |
| 20832 | Patient026D  | Patient058   |
| 20832 | Patient026D  | Patient088   |
| 20832 | Patient026E  | Patient089A2 |

|       |              |              |
|-------|--------------|--------------|
| 20832 | Patient026E  | Patient171   |
| 20832 | Patient032B  | Patient193   |
| 20832 | Patient033   | Patient180   |
| 20832 | Patient045C  | Patient089A2 |
| 20832 | Patient088   | Patient094A  |
| 20832 | Patient089A2 | Patient194   |
| 20832 | Patient164   | Patient180   |
| 20832 | Patient193   | Patient261B  |
| 20833 | Patient032A  | Patient193   |
| 20833 | Patient034C  | Patient193   |
| 20833 | Patient045B  | Patient088   |
| 20833 | Patient045C  | Patient058   |
| 20833 | Patient069   | Patient207   |
| 20833 | Patient088   | Patient093D  |
| 20833 | Patient089A1 | Patient183E  |
| 20833 | Patient089A2 | Patient094A  |
| 20833 | Patient092G  | Patient193   |
| 20833 | Patient114   | Patient176   |
| 20833 | Patient171   | Patient177   |
| 20833 | Patient183D  | Patient193   |
| 20834 | Patient026E  | Patient058   |
| 20834 | Patient026E  | Patient088   |
| 20834 | Patient034A  | Patient193   |
| 20834 | Patient034E  | Patient114   |
| 20834 | Patient069   | Patient146   |
| 20834 | Patient081D  | Patient171   |
| 20834 | Patient086A  | Patient114   |
| 20834 | Patient088   | Patient094B  |
| 20834 | Patient089A1 | Patient092D  |
| 20834 | Patient089A2 | Patient093D  |
| 20834 | Patient167   | Patient180   |
| 20835 | Patient034B  | Patient114   |
| 20835 | Patient045C  | Patient088   |
| 20835 | Patient088   | Patient094C  |
| 20835 | Patient089A1 | Patient150C  |
| 20835 | Patient092H  | Patient193   |
| 20835 | Patient093E  | Patient193   |
| 20835 | Patient100B  | Patient141F  |
| 20835 | Patient179   | Patient183E  |
| 20835 | Patient207   | Patient238   |
| 20836 | Patient034D  | Patient114   |
| 20836 | Patient086B  | Patient114   |
| 20836 | Patient086E  | Patient114   |
| 20836 | Patient089A1 | Patient176   |
| 20836 | Patient089A2 | Patient094B  |
| 20836 | Patient093C  | Patient114   |
| 20836 | Patient093D  | Patient193   |
| 20836 | Patient171   | Patient207   |
| 20837 | Patient033   | Patient171   |
| 20837 | Patient058   | Patient183A  |

|       |              |              |
|-------|--------------|--------------|
| 20837 | Patient075   | Patient238   |
| 20837 | Patient086A  | Patient193   |
| 20837 | Patient088   | Patient183A  |
| 20837 | Patient089A1 | Patient183C  |
| 20837 | Patient089A2 | Patient094C  |
| 20837 | Patient093A  | Patient193   |
| 20837 | Patient094A  | Patient193   |
| 20837 | Patient141F  | Patient238   |
| 20837 | Patient179   | Patient183C  |
| 20837 | Patient193   | Patient261D  |
| 20838 | Patient029   | Patient183A  |
| 20838 | Patient038   | Patient088   |
| 20838 | Patient069   | Patient145B  |
| 20838 | Patient069   | Patient167   |
| 20838 | Patient069   | Patient183B  |
| 20838 | Patient164   | Patient171   |
| 20838 | Patient164   | Patient179   |
| 20838 | Patient180   | Patient183B  |
| 20839 | Patient029   | Patient146   |
| 20839 | Patient034E  | Patient193   |
| 20839 | Patient053C  | Patient114   |
| 20839 | Patient069   | Patient261G  |
| 20839 | Patient086B  | Patient193   |
| 20839 | Patient086E  | Patient193   |
| 20839 | Patient089A2 | Patient183A  |
| 20839 | Patient100B  | Patient145A  |
| 20840 | Patient013   | Patient215   |
| 20840 | Patient034B  | Patient193   |
| 20840 | Patient038   | Patient193   |
| 20840 | Patient094B  | Patient193   |
| 20840 | Patient100B  | Patient261E  |
| 20840 | Patient114   | Patient183B  |
| 20841 | Patient034D  | Patient193   |
| 20841 | Patient058   | Patient093E  |
| 20841 | Patient089A1 | Patient150A  |
| 20841 | Patient176   | Patient193   |
| 20841 | Patient180   | Patient183E  |
| 20841 | Patient192A  | Patient193   |
| 20841 | Patient238   | Patient261A  |
| 20842 | Patient053B  | Patient114   |
| 20842 | Patient058   | Patient094A  |
| 20842 | Patient058   | Patient183D  |
| 20842 | Patient069   | Patient183E  |
| 20842 | Patient094C  | Patient193   |
| 20842 | Patient099E  | Patient189C2 |
| 20842 | Patient145B  | Patient180   |
| 20842 | Patient180   | Patient261G  |
| 20842 | Patient183B  | Patient193   |
| 20842 | Patient238   | Patient261E  |
| 20843 | Patient029   | Patient261G  |

|       |              |              |
|-------|--------------|--------------|
| 20843 | Patient053A2 | Patient114   |
| 20843 | Patient058   | Patient093A  |
| 20843 | Patient058   | Patient161B  |
| 20843 | Patient088   | Patient161B  |
| 20843 | Patient089A2 | Patient161B  |
| 20843 | Patient180   | Patient183C  |
| 20844 | Patient026C  | Patient100B  |
| 20844 | Patient029   | Patient167   |
| 20844 | Patient029   | Patient183D  |
| 20844 | Patient038   | Patient089A2 |
| 20844 | Patient053C  | Patient193   |
| 20844 | Patient058   | Patient093D  |
| 20844 | Patient069   | Patient183C  |
| 20844 | Patient089A1 | Patient204   |
| 20844 | Patient100B  | Patient261C  |
| 20844 | Patient114   | Patient183E  |
| 20844 | Patient167   | Patient179   |
| 20844 | Patient189C2 | Patient213B  |
| 20845 | Patient029   | Patient094A  |
| 20845 | Patient029   | Patient145B  |
| 20845 | Patient058   | Patient092D  |
| 20845 | Patient089A2 | Patient183D  |
| 20845 | Patient159   | Patient189C2 |
| 20845 | Patient192B  | Patient193   |
| 20846 | Patient013   | Patient198   |
| 20846 | Patient029   | Patient093A  |
| 20846 | Patient029   | Patient093E  |
| 20846 | Patient088   | Patient183D  |
| 20846 | Patient093C  | Patient171   |
| 20846 | Patient099E  | Patient189C1 |
| 20846 | Patient100B  | Patient145C  |
| 20846 | Patient100B  | Patient230C  |
| 20846 | Patient114   | Patient183C  |
| 20846 | Patient141G  | Patient180   |
| 20846 | Patient183E  | Patient193   |
| 20846 | Patient189C1 | Patient213B  |
| 20846 | Patient189C2 | Patient213A  |
| 20846 | Patient193   | Patient247D  |
| 20846 | Patient230C  | Patient238   |
| 20846 | Patient238   | Patient261C  |
| 20847 | Patient029   | Patient141G  |
| 20847 | Patient053B  | Patient193   |
| 20847 | Patient089A1 | Patient241   |
| 20847 | Patient114   | Patient192A  |
| 20847 | Patient189C1 | Patient213A  |
| 20847 | Patient192C  | Patient193   |
| 20847 | Patient230G  | Patient238   |
| 20848 | Patient032E  | Patient238   |
| 20848 | Patient033   | Patient114   |
| 20848 | Patient045A  | Patient171   |



|       |              |              |
|-------|--------------|--------------|
| 20848 | Patient053A2 | Patient193   |
| 20848 | Patient058   | Patient094B  |
| 20848 | Patient088   | Patient092D  |
| 20848 | Patient089A1 | Patient207   |
| 20848 | Patient159   | Patient189C1 |
| 20848 | Patient183C  | Patient193   |
| 20849 | Patient053C  | Patient189C2 |
| 20849 | Patient058   | Patient094C  |
| 20849 | Patient100B  | Patient230G  |
| 20849 | Patient145B  | Patient179   |
| 20849 | Patient179   | Patient261G  |
| 20849 | Patient189C1 | Patient258F  |
| 20849 | Patient238   | Patient261B  |
| 20850 | Patient089A1 | Patient150B  |
| 20850 | Patient100B  | Patient141D  |
| 20850 | Patient114   | Patient192B  |
| 20850 | Patient189C2 | Patient258F  |
| 20851 | Patient032E  | Patient100B  |
| 20851 | Patient045B  | Patient171   |
| 20851 | Patient058   | Patient183B  |
| 20851 | Patient088   | Patient204   |
| 20851 | Patient089A2 | Patient092D  |
| 20851 | Patient179   | Patient207   |
| 20851 | Patient193   | Patient247C  |
| 20852 | Patient029   | Patient093D  |
| 20852 | Patient032C  | Patient238   |
| 20852 | Patient092E  | Patient114   |
| 20852 | Patient093E  | Patient238   |
| 20852 | Patient100B  | Patient261A  |
| 20852 | Patient114   | Patient192C  |
| 20853 | Patient029   | Patient094B  |
| 20853 | Patient029   | Patient094C  |
| 20853 | Patient029   | Patient183B  |
| 20853 | Patient038   | Patient100B  |
| 20853 | Patient045C  | Patient171   |
| 20853 | Patient053B  | Patient189C2 |
| 20853 | Patient069   | Patient141F  |
| 20853 | Patient089A1 | Patient093C  |
| 20853 | Patient089A1 | Patient230D  |
| 20853 | Patient093A  | Patient238   |
| 20853 | Patient189B  | Patient189C2 |
| 20853 | Patient189C1 | Patient258A1 |
| 20853 | Patient189C1 | Patient258A2 |
| 20853 | Patient189C1 | Patient258B  |
| 20853 | Patient192E  | Patient193   |
| 20854 | Patient029   | Patient038   |
| 20854 | Patient053A2 | Patient189C2 |
| 20854 | Patient053C  | Patient189C1 |
| 20854 | Patient069   | Patient141G  |
| 20854 | Patient069   | Patient242   |

|       |              |              |
|-------|--------------|--------------|
| 20854 | Patient089A2 | Patient183B  |
| 20854 | Patient141G  | Patient179   |
| 20854 | Patient189A  | Patient189C2 |
| 20854 | Patient189C2 | Patient201B  |
| 20854 | Patient189C2 | Patient258A1 |
| 20854 | Patient189C2 | Patient258A2 |
| 20854 | Patient189C2 | Patient258B  |
| 20854 | Patient193   | Patient246A  |
| 20855 | Patient032C  | Patient100B  |
| 20855 | Patient032D  | Patient180   |
| 20855 | Patient058   | Patient183E  |
| 20855 | Patient088   | Patient183B  |
| 20855 | Patient094A  | Patient238   |
| 20855 | Patient128   | Patient215   |
| 20855 | Patient189B  | Patient189C1 |
| 20855 | Patient189C2 | Patient189E  |
| 20855 | Patient193   | Patient247A  |
| 20855 | Patient193   | Patient247B  |
| 20855 | Patient238   | Patient261D  |
| 20856 | Patient026C  | Patient238   |
| 20856 | Patient058   | Patient176   |
| 20856 | Patient088   | Patient150C  |
| 20856 | Patient089A2 | Patient183E  |
| 20856 | Patient093B  | Patient114   |
| 20856 | Patient093D  | Patient238   |
| 20856 | Patient171   | Patient205   |
| 20856 | Patient180   | Patient207   |
| 20856 | Patient192F  | Patient193   |
| 20857 | Patient029   | Patient141F  |
| 20857 | Patient029   | Patient183E  |
| 20857 | Patient038   | Patient058   |
| 20857 | Patient038   | Patient238   |
| 20857 | Patient045D  | Patient100B  |
| 20857 | Patient058   | Patient150C  |
| 20857 | Patient058   | Patient183C  |
| 20857 | Patient075   | Patient180   |
| 20857 | Patient088   | Patient176   |
| 20857 | Patient088   | Patient194   |
| 20857 | Patient092E  | Patient193   |
| 20857 | Patient092G  | Patient189C2 |
| 20857 | Patient100B  | Patient217A  |
| 20857 | Patient145A  | Patient238   |
| 20857 | Patient189A  | Patient189C1 |
| 20857 | Patient189C1 | Patient201B  |
| 20857 | Patient189C1 | Patient258D  |
| 20857 | Patient189C2 | Patient222A  |
| 20857 | Patient189C2 | Patient236B  |
| 20857 | Patient189C2 | Patient252D  |
| 20858 | Patient053B  | Patient189C1 |
| 20858 | Patient069   | Patient093E  |

|       |              |              |
|-------|--------------|--------------|
| 20858 | Patient069   | Patient094A  |
| 20858 | Patient088   | Patient150A  |
| 20858 | Patient088   | Patient183E  |
| 20858 | Patient089A2 | Patient150C  |
| 20858 | Patient089A2 | Patient204   |
| 20858 | Patient092H  | Patient189C2 |
| 20858 | Patient114   | Patient192E  |
| 20858 | Patient127A  | Patient189C2 |
| 20858 | Patient189C1 | Patient189E  |
| 20858 | Patient189C1 | Patient258G  |
| 20858 | Patient189C2 | Patient258D  |
| 20859 | Patient029   | Patient183C  |
| 20859 | Patient053A2 | Patient189C1 |
| 20859 | Patient058   | Patient150A  |
| 20859 | Patient069   | Patient093A  |
| 20859 | Patient069   | Patient261E  |
| 20859 | Patient089A2 | Patient176   |
| 20859 | Patient092A  | Patient114   |
| 20859 | Patient094B  | Patient238   |
| 20859 | Patient094C  | Patient238   |
| 20859 | Patient128   | Patient171   |
| 20859 | Patient141F  | Patient180   |
| 20859 | Patient189C2 | Patient258G  |
| 20859 | Patient193   | Patient204   |
| 20859 | Patient193   | Patient247E  |
| 20860 | Patient088   | Patient183C  |
| 20860 | Patient089A2 | Patient183C  |
| 20860 | Patient094D  | Patient114   |
| 20860 | Patient189C1 | Patient222A  |
| 20860 | Patient189C1 | Patient252D  |
| 20860 | Patient189C2 | Patient222B  |
| 20860 | Patient217A  | Patient238   |
| 20861 | Patient029   | Patient258E  |
| 20861 | Patient033   | Patient100B  |
| 20861 | Patient054   | Patient171   |
| 20861 | Patient089A2 | Patient150A  |
| 20861 | Patient100B  | Patient261B  |
| 20861 | Patient114   | Patient192F  |
| 20861 | Patient127A  | Patient189C1 |
| 20861 | Patient157   | Patient193   |
| 20861 | Patient189C1 | Patient236B  |
| 20862 | Patient032B  | Patient100B  |
| 20862 | Patient033   | Patient193   |
| 20862 | Patient034C  | Patient100B  |
| 20862 | Patient069   | Patient094B  |
| 20862 | Patient069   | Patient094C  |
| 20862 | Patient069   | Patient230C  |
| 20862 | Patient092G  | Patient189C1 |
| 20862 | Patient099E  | Patient114   |
| 20862 | Patient100B  | Patient217B  |

|       |              |              |
|-------|--------------|--------------|
| 20862 | Patient100B  | Patient217H  |
| 20862 | Patient100B  | Patient217I  |
| 20862 | Patient114   | Patient207   |
| 20862 | Patient127B  | Patient189C2 |
| 20862 | Patient145C  | Patient238   |
| 20862 | Patient180   | Patient230C  |
| 20863 | Patient032A  | Patient100B  |
| 20863 | Patient032D  | Patient179   |
| 20863 | Patient034A  | Patient100B  |
| 20863 | Patient069   | Patient093D  |
| 20863 | Patient069   | Patient261C  |
| 20863 | Patient092H  | Patient189C1 |
| 20863 | Patient100B  | Patient217C  |
| 20863 | Patient100B  | Patient217D  |
| 20863 | Patient100B  | Patient217F  |
| 20863 | Patient114   | Patient213B  |
| 20863 | Patient180   | Patient261E  |
| 20863 | Patient189C1 | Patient222B  |
| 20864 | Patient029   | Patient033   |
| 20864 | Patient092A  | Patient193   |
| 20864 | Patient092B  | Patient114   |
| 20864 | Patient114   | Patient159   |
| 20864 | Patient123A  | Patient238   |
| 20864 | Patient189C2 | Patient218A  |
| 20864 | Patient193   | Patient207   |
| 20864 | Patient217I  | Patient238   |
| 20865 | Patient032E  | Patient180   |
| 20865 | Patient058   | Patient128   |
| 20865 | Patient069   | Patient230G  |
| 20865 | Patient093E  | Patient100B  |
| 20865 | Patient093E  | Patient179   |
| 20865 | Patient123C  | Patient238   |
| 20865 | Patient127B  | Patient189C1 |
| 20865 | Patient141F  | Patient179   |
| 20865 | Patient189C2 | Patient196A  |
| 20865 | Patient217B  | Patient238   |
| 20865 | Patient217H  | Patient238   |
| 20866 | Patient029   | Patient261E  |
| 20866 | Patient032E  | Patient069   |
| 20866 | Patient038   | Patient069   |
| 20866 | Patient093A  | Patient100B  |
| 20866 | Patient093A  | Patient179   |
| 20866 | Patient093B  | Patient171   |
| 20866 | Patient100B  | Patient217E  |
| 20866 | Patient100B  | Patient261D  |
| 20866 | Patient189C1 | Patient218A  |
| 20866 | Patient217C  | Patient238   |
| 20866 | Patient217D  | Patient238   |
| 20866 | Patient217F  | Patient238   |
| 20867 | Patient029   | Patient230C  |

|       |              |              |
|-------|--------------|--------------|
| 20867 | Patient058   | Patient241   |
| 20867 | Patient088   | Patient093C  |
| 20867 | Patient089A2 | Patient093C  |
| 20867 | Patient099A  | Patient189C2 |
| 20867 | Patient099B  | Patient189C2 |
| 20867 | Patient123B  | Patient238   |
| 20867 | Patient180   | Patient261C  |
| 20867 | Patient189C2 | Patient201E  |
| 20868 | Patient034B  | Patient100B  |
| 20868 | Patient038   | Patient179   |
| 20868 | Patient069   | Patient145A  |
| 20868 | Patient092G  | Patient238   |
| 20868 | Patient093C  | Patient193   |
| 20868 | Patient094A  | Patient100B  |
| 20868 | Patient094A  | Patient179   |
| 20868 | Patient094D  | Patient171   |
| 20868 | Patient094E  | Patient114   |
| 20868 | Patient176   | Patient238   |
| 20868 | Patient189C1 | Patient196A  |
| 20869 | Patient029   | Patient261C  |
| 20869 | Patient032C  | Patient180   |
| 20869 | Patient034E  | Patient100B  |
| 20869 | Patient092B  | Patient193   |
| 20869 | Patient093D  | Patient100B  |
| 20869 | Patient093D  | Patient179   |
| 20869 | Patient104B  | Patient238   |
| 20869 | Patient123D  | Patient238   |
| 20869 | Patient128   | Patient179   |
| 20869 | Patient180   | Patient230G  |
| 20869 | Patient184   | Patient189C2 |
| 20869 | Patient217E  | Patient238   |
| 20870 | Patient032C  | Patient069   |
| 20870 | Patient058   | Patient204   |
| 20870 | Patient058   | Patient207   |
| 20870 | Patient069   | Patient104B  |
| 20870 | Patient089A1 | Patient177   |
| 20870 | Patient092H  | Patient238   |
| 20870 | Patient099A  | Patient189C1 |
| 20870 | Patient099B  | Patient189C1 |
| 20870 | Patient104A  | Patient238   |
| 20870 | Patient114   | Patient201B  |
| 20870 | Patient179   | Patient261E  |
| 20870 | Patient187   | Patient189C2 |
| 20870 | Patient189C1 | Patient201E  |
| 20870 | Patient189C2 | Patient196E  |
| 20870 | Patient189C2 | Patient201A  |
| 20870 | Patient189C2 | Patient236A  |
| 20870 | Patient189C2 | Patient246C  |
| 20871 | Patient029   | Patient032E  |
| 20871 | Patient029   | Patient207   |

|       |              |              |
|-------|--------------|--------------|
| 20871 | Patient029   | Patient230G  |
| 20871 | Patient034D  | Patient100B  |
| 20871 | Patient081C  | Patient238   |
| 20871 | Patient088   | Patient150B  |
| 20871 | Patient089A2 | Patient241   |
| 20871 | Patient094B  | Patient100B  |
| 20871 | Patient099C  | Patient189C2 |
| 20871 | Patient100B  | Patient192D  |
| 20871 | Patient114   | Patient121A  |
| 20871 | Patient141D  | Patient238   |
| 20871 | Patient189C2 | Patient196C  |
| 20871 | Patient189C2 | Patient222D  |
| 20872 | Patient045A  | Patient189C2 |
| 20872 | Patient058   | Patient150B  |
| 20872 | Patient069   | Patient104A  |
| 20872 | Patient069   | Patient261A  |
| 20872 | Patient094B  | Patient179   |
| 20872 | Patient094C  | Patient100B  |
| 20872 | Patient094C  | Patient179   |
| 20872 | Patient100B  | Patient204   |
| 20872 | Patient100B  | Patient217J  |
| 20872 | Patient184   | Patient189C1 |
| 20872 | Patient187   | Patient189C1 |
| 20872 | Patient189C2 | Patient218B  |
| 20872 | Patient189C2 | Patient222F  |
| 20873 | Patient045A  | Patient189C1 |
| 20873 | Patient089A1 | Patient093B  |
| 20873 | Patient089A2 | Patient150B  |
| 20873 | Patient089A2 | Patient207   |
| 20873 | Patient093E  | Patient180   |
| 20873 | Patient099D  | Patient189C2 |
| 20873 | Patient179   | Patient230C  |
| 20873 | Patient189C1 | Patient196E  |
| 20873 | Patient189C1 | Patient201A  |
| 20873 | Patient189C1 | Patient236A  |
| 20873 | Patient189C1 | Patient246C  |
| 20873 | Patient189C2 | Patient222E  |
| 20873 | Patient189C2 | Patient246E  |
| 20874 | Patient069   | Patient141D  |
| 20874 | Patient069   | Patient145C  |
| 20874 | Patient088   | Patient241   |
| 20874 | Patient089A1 | Patient205   |
| 20874 | Patient093A  | Patient180   |
| 20874 | Patient099C  | Patient189C1 |
| 20874 | Patient114   | Patient121B  |
| 20874 | Patient114   | Patient222A  |
| 20874 | Patient179   | Patient261C  |
| 20874 | Patient189C1 | Patient196C  |
| 20874 | Patient189C1 | Patient218B  |
| 20874 | Patient189C1 | Patient222D  |

|       |              |              |
|-------|--------------|--------------|
| 20874 | Patient189C2 | Patient196B  |
| 20875 | Patient029   | Patient032C  |
| 20875 | Patient032E  | Patient179   |
| 20875 | Patient038   | Patient180   |
| 20875 | Patient045B  | Patient189C2 |
| 20875 | Patient058   | Patient093C  |
| 20875 | Patient114   | Patient202   |
| 20875 | Patient114   | Patient236B  |
| 20875 | Patient121A  | Patient193   |
| 20875 | Patient128   | Patient238   |
| 20875 | Patient189C1 | Patient222F  |
| 20875 | Patient189C2 | Patient220A  |
| 20875 | Patient189C2 | Patient246B  |
| 20875 | Patient217J  | Patient238   |
| 20876 | Patient045B  | Patient189C1 |
| 20876 | Patient088   | Patient207   |
| 20876 | Patient089A1 | Patient094D  |
| 20876 | Patient089A2 | Patient230D  |
| 20876 | Patient099D  | Patient189C1 |
| 20876 | Patient114   | Patient177   |
| 20876 | Patient114   | Patient222B  |
| 20876 | Patient179   | Patient230G  |
| 20876 | Patient189C1 | Patient222E  |
| 20876 | Patient189C1 | Patient246E  |
| 20877 | Patient029   | Patient093C  |
| 20877 | Patient029   | Patient247D  |
| 20877 | Patient032B  | Patient238   |
| 20877 | Patient045C  | Patient189C2 |
| 20877 | Patient058   | Patient230D  |
| 20877 | Patient092D  | Patient180   |
| 20877 | Patient093D  | Patient180   |
| 20877 | Patient094E  | Patient171   |
| 20877 | Patient114   | Patient127A  |
| 20877 | Patient114   | Patient252D  |
| 20877 | Patient189C1 | Patient196B  |
| 20877 | Patient189C2 | Patient246D  |
| 20878 | Patient032A  | Patient238   |
| 20878 | Patient034C  | Patient238   |
| 20878 | Patient045C  | Patient189C1 |
| 20878 | Patient053A1 | Patient179   |
| 20878 | Patient088   | Patient230D  |
| 20878 | Patient094A  | Patient180   |
| 20878 | Patient100B  | Patient128   |
| 20878 | Patient100B  | Patient189B  |
| 20878 | Patient121B  | Patient193   |
| 20878 | Patient171   | Patient230D  |
| 20878 | Patient189C1 | Patient220A  |
| 20878 | Patient189C1 | Patient246B  |
| 20879 | Patient022B  | Patient114   |
| 20879 | Patient026D  | Patient238   |

|       |              |              |
|-------|--------------|--------------|
| 20879 | Patient032C  | Patient179   |
| 20879 | Patient034A  | Patient238   |
| 20879 | Patient053C  | Patient238   |
| 20879 | Patient069   | Patient128   |
| 20879 | Patient092D  | Patient179   |
| 20879 | Patient100B  | Patient189A  |
| 20879 | Patient128   | Patient180   |
| 20879 | Patient177   | Patient193   |
| 20879 | Patient204   | Patient238   |
| 20880 | Patient007A  | Patient238   |
| 20880 | Patient029   | Patient104B  |
| 20880 | Patient029   | Patient261A  |
| 20880 | Patient094B  | Patient180   |
| 20880 | Patient094C  | Patient180   |
| 20880 | Patient100B  | Patient123A  |
| 20880 | Patient114   | Patient196A  |
| 20880 | Patient189C1 | Patient246D  |
| 20880 | Patient189C2 | Patient192A  |
| 20881 | Patient026E  | Patient238   |
| 20881 | Patient053A1 | Patient180   |
| 20881 | Patient081D  | Patient238   |
| 20881 | Patient088   | Patient205   |
| 20881 | Patient100B  | Patient123C  |
| 20881 | Patient100B  | Patient189E  |
| 20881 | Patient189C2 | Patient263B  |
| 20881 | Patient189C2 | Patient265   |
| 20882 | Patient032A  | Patient069   |
| 20882 | Patient032B  | Patient069   |
| 20882 | Patient034C  | Patient069   |
| 20882 | Patient053B  | Patient238   |
| 20882 | Patient069   | Patient123A  |
| 20882 | Patient092E  | Patient189C2 |
| 20882 | Patient100B  | Patient176   |
| 20882 | Patient238   | Patient247D  |
| 20883 | Patient034A  | Patient069   |
| 20883 | Patient053A2 | Patient238   |
| 20883 | Patient069   | Patient123C  |
| 20883 | Patient069   | Patient204   |
| 20883 | Patient069   | Patient261B  |
| 20883 | Patient100B  | Patient123B  |
| 20883 | Patient114   | Patient127B  |
| 20884 | Patient007B  | Patient238   |
| 20884 | Patient029   | Patient247C  |
| 20884 | Patient034E  | Patient238   |
| 20884 | Patient114   | Patient187   |
| 20884 | Patient114   | Patient218A  |
| 20884 | Patient189C1 | Patient263B  |
| 20884 | Patient189C1 | Patient265   |
| 20885 | Patient029   | Patient045D  |
| 20885 | Patient029   | Patient104A  |



|       |              |              |
|-------|--------------|--------------|
| 20885 | Patient054   | Patient089A1 |
| 20885 | Patient069   | Patient123B  |
| 20885 | Patient081C  | Patient189C2 |
| 20885 | Patient088   | Patient093B  |
| 20885 | Patient089A1 | Patient094E  |
| 20885 | Patient089A1 | Patient242   |
| 20885 | Patient092G  | Patient100B  |
| 20885 | Patient100B  | Patient123D  |
| 20885 | Patient100B  | Patient164   |
| 20885 | Patient114   | Patient126E  |
| 20885 | Patient114   | Patient246C  |
| 20885 | Patient149B  | Patient189C2 |
| 20885 | Patient179   | Patient204   |
| 20885 | Patient189C1 | Patient192A  |
| 20886 | Patient029   | Patient204   |
| 20886 | Patient034D  | Patient238   |
| 20886 | Patient081C  | Patient189C1 |
| 20886 | Patient093C  | Patient238   |
| 20886 | Patient100B  | Patient104A  |
| 20886 | Patient100B  | Patient104B  |
| 20886 | Patient114   | Patient201E  |
| 20886 | Patient114   | Patient222D  |
| 20886 | Patient114   | Patient236A  |
| 20886 | Patient189C2 | Patient192B  |
| 20887 | Patient029   | Patient247A  |
| 20887 | Patient034B  | Patient238   |
| 20887 | Patient069   | Patient123D  |
| 20887 | Patient089A1 | Patient131   |
| 20887 | Patient089A2 | Patient093B  |
| 20887 | Patient092E  | Patient189C1 |
| 20887 | Patient092H  | Patient100B  |
| 20887 | Patient114   | Patient196C  |
| 20887 | Patient114   | Patient201A  |
| 20887 | Patient114   | Patient246E  |
| 20888 | Patient013   | Patient179   |
| 20888 | Patient029   | Patient247B  |
| 20888 | Patient069   | Patient261D  |
| 20888 | Patient089A2 | Patient205   |
| 20888 | Patient092A  | Patient189C2 |
| 20888 | Patient093B  | Patient193   |
| 20888 | Patient099A  | Patient114   |
| 20888 | Patient099B  | Patient114   |
| 20888 | Patient114   | Patient184   |
| 20888 | Patient149B  | Patient189C1 |
| 20888 | Patient189C2 | Patient192C  |
| 20888 | Patient192A  | Patient238   |
| 20888 | Patient193   | Patient205   |
| 20889 | Patient029   | Patient157   |
| 20889 | Patient029   | Patient261B  |
| 20889 | Patient034E  | Patient069   |

|       |              |              |
|-------|--------------|--------------|
| 20889 | Patient069   | Patient093C  |
| 20889 | Patient069   | Patient247D  |
| 20889 | Patient088   | Patient094D  |
| 20889 | Patient089A1 | Patient128   |
| 20889 | Patient089A1 | Patient213A  |
| 20889 | Patient114   | Patient196E  |
| 20889 | Patient114   | Patient222F  |
| 20889 | Patient114   | Patient246B  |
| 20889 | Patient176   | Patient180   |
| 20889 | Patient180   | Patient204   |
| 20890 | Patient029   | Patient247E  |
| 20890 | Patient034D  | Patient069   |
| 20890 | Patient089A2 | Patient094D  |
| 20890 | Patient114   | Patient222E  |
| 20891 | Patient013   | Patient171   |
| 20891 | Patient013   | Patient180   |
| 20891 | Patient026C  | Patient029   |
| 20891 | Patient029   | Patient145A  |
| 20891 | Patient034B  | Patient069   |
| 20891 | Patient045D  | Patient114   |
| 20891 | Patient058   | Patient177   |
| 20891 | Patient069   | Patient092G  |
| 20891 | Patient088   | Patient177   |
| 20891 | Patient189C1 | Patient192B  |
| 20891 | Patient189C2 | Patient261A  |
| 20891 | Patient192B  | Patient238   |
| 20892 | Patient069   | Patient092H  |
| 20892 | Patient069   | Patient176   |
| 20892 | Patient092E  | Patient238   |
| 20892 | Patient094D  | Patient193   |
| 20892 | Patient099C  | Patient114   |
| 20892 | Patient100B  | Patient183A  |
| 20892 | Patient114   | Patient196B  |
| 20892 | Patient114   | Patient218B  |
| 20892 | Patient114   | Patient246D  |
| 20892 | Patient126E  | Patient171   |
| 20892 | Patient128   | Patient193   |
| 20892 | Patient189C1 | Patient261A  |
| 20893 | Patient054   | Patient088   |
| 20893 | Patient089A2 | Patient177   |
| 20893 | Patient092A  | Patient189C1 |
| 20893 | Patient092B  | Patient189C2 |
| 20893 | Patient114   | Patient220A  |
| 20893 | Patient189C1 | Patient192C  |
| 20893 | Patient189C2 | Patient235F  |
| 20893 | Patient193   | Patient235F  |
| 20894 | Patient029   | Patient261D  |
| 20894 | Patient069   | Patient247C  |
| 20894 | Patient081D  | Patient189C2 |
| 20894 | Patient099D  | Patient114   |

|       |              |              |
|-------|--------------|--------------|
| 20894 | Patient114   | Patient235F  |
| 20894 | Patient176   | Patient179   |
| 20894 | Patient189C2 | Patient192E  |
| 20894 | Patient189C2 | Patient235E  |
| 20894 | Patient238   | Patient247C  |
| 20895 | Patient029   | Patient128   |
| 20895 | Patient058   | Patient093B  |
| 20895 | Patient069   | Patient246A  |
| 20895 | Patient081B  | Patient238   |
| 20895 | Patient081D  | Patient189C1 |
| 20895 | Patient081E  | Patient238   |
| 20895 | Patient088   | Patient131   |
| 20895 | Patient100B  | Patient247D  |
| 20895 | Patient123A  | Patient189C2 |
| 20895 | Patient159   | Patient193   |
| 20895 | Patient189C1 | Patient242   |
| 20895 | Patient192C  | Patient238   |
| 20895 | Patient193   | Patient235E  |
| 20896 | Patient029   | Patient093B  |
| 20896 | Patient069   | Patient247A  |
| 20896 | Patient081C  | Patient100B  |
| 20896 | Patient114   | Patient235E  |
| 20896 | Patient145A  | Patient189C2 |
| 20896 | Patient189C2 | Patient196D  |
| 20896 | Patient189C2 | Patient242   |
| 20897 | Patient029   | Patient145C  |
| 20897 | Patient029   | Patient176   |
| 20897 | Patient069   | Patient247B  |
| 20897 | Patient069   | Patient247E  |
| 20897 | Patient088   | Patient094E  |
| 20897 | Patient088   | Patient128   |
| 20897 | Patient099E  | Patient193   |
| 20897 | Patient114   | Patient189A  |
| 20897 | Patient114   | Patient189B  |
| 20897 | Patient114   | Patient232D  |
| 20897 | Patient114   | Patient232E  |
| 20897 | Patient123C  | Patient189C2 |
| 20897 | Patient161B  | Patient171   |
| 20897 | Patient238   | Patient241   |
| 20897 | Patient238   | Patient246A  |
| 20897 | Patient238   | Patient247A  |
| 20898 | Patient023   | Patient189C1 |
| 20898 | Patient054   | Patient193   |
| 20898 | Patient058   | Patient094D  |
| 20898 | Patient081A2 | Patient238   |
| 20898 | Patient089A1 | Patient126E  |
| 20898 | Patient092B  | Patient189C1 |
| 20898 | Patient114   | Patient263B  |
| 20898 | Patient189C1 | Patient235F  |
| 20898 | Patient193   | Patient213B  |

|       |              |              |
|-------|--------------|--------------|
| 20898 | Patient238   | Patient247B  |
| 20899 | Patient023   | Patient189C2 |
| 20899 | Patient029   | Patient075   |
| 20899 | Patient053C  | Patient100B  |
| 20899 | Patient054   | Patient089A2 |
| 20899 | Patient069   | Patient157   |
| 20899 | Patient081F  | Patient238   |
| 20899 | Patient089A2 | Patient094E  |
| 20899 | Patient092A  | Patient238   |
| 20899 | Patient093C  | Patient179   |
| 20899 | Patient100B  | Patient183D  |
| 20899 | Patient114   | Patient232A  |
| 20899 | Patient114   | Patient232B  |
| 20899 | Patient114   | Patient265   |
| 20899 | Patient123B  | Patient189C2 |
| 20899 | Patient189C1 | Patient192E  |
| 20899 | Patient189C1 | Patient196D  |
| 20899 | Patient189C1 | Patient235E  |
| 20899 | Patient189C2 | Patient192F  |
| 20899 | Patient192E  | Patient238   |
| 20900 | Patient029   | Patient094D  |
| 20900 | Patient058   | Patient205   |
| 20900 | Patient089A2 | Patient131   |
| 20900 | Patient093C  | Patient100B  |
| 20900 | Patient100B  | Patient205   |
| 20900 | Patient114   | Patient189E  |
| 20900 | Patient123A  | Patient189C1 |
| 20900 | Patient157   | Patient238   |
| 20901 | Patient022B  | Patient171   |
| 20901 | Patient029   | Patient081C  |
| 20901 | Patient029   | Patient141D  |
| 20901 | Patient094E  | Patient193   |
| 20901 | Patient100B  | Patient192A  |
| 20901 | Patient103A  | Patient114   |
| 20901 | Patient123D  | Patient189C2 |
| 20901 | Patient145A  | Patient189C1 |
| 20901 | Patient189C2 | Patient261B  |
| 20901 | Patient192F  | Patient238   |
| 20901 | Patient238   | Patient247E  |
| 20902 | Patient026D  | Patient189C2 |
| 20902 | Patient053B  | Patient100B  |
| 20902 | Patient069   | Patient075   |
| 20902 | Patient081B  | Patient100B  |
| 20902 | Patient100B  | Patient206   |
| 20902 | Patient123C  | Patient189C1 |
| 20902 | Patient145C  | Patient189C2 |
| 20902 | Patient177   | Patient238   |
| 20902 | Patient189C1 | Patient241   |
| 20902 | Patient189C1 | Patient261B  |
| 20903 | Patient026D  | Patient189C1 |

|       |              |              |
|-------|--------------|--------------|
| 20903 | Patient053A2 | Patient100B  |
| 20903 | Patient081A1 | Patient238   |
| 20903 | Patient089A2 | Patient128   |
| 20903 | Patient114   | Patient232C  |
| 20903 | Patient189C2 | Patient241   |
| 20903 | Patient193   | Patient201B  |
| 20904 | Patient026E  | Patient189C1 |
| 20904 | Patient026E  | Patient189C2 |
| 20904 | Patient081E  | Patient100B  |
| 20904 | Patient092B  | Patient238   |
| 20904 | Patient114   | Patient149B  |
| 20904 | Patient123B  | Patient189C1 |
| 20904 | Patient171   | Patient232D  |
| 20904 | Patient171   | Patient232E  |
| 20904 | Patient189C1 | Patient192F  |
| 20905 | Patient053A1 | Patient089A1 |
| 20905 | Patient093B  | Patient238   |
| 20905 | Patient100B  | Patient192B  |
| 20905 | Patient100B  | Patient247C  |
| 20905 | Patient150C  | Patient171   |
| 20905 | Patient189C2 | Patient261D  |
| 20905 | Patient193   | Patient222A  |
| 20906 | Patient054   | Patient058   |
| 20906 | Patient058   | Patient094E  |
| 20906 | Patient081D  | Patient100B  |
| 20906 | Patient103A  | Patient193   |
| 20906 | Patient123D  | Patient189C1 |
| 20906 | Patient150A  | Patient171   |
| 20906 | Patient171   | Patient232A  |
| 20906 | Patient189C1 | Patient261D  |
| 20907 | Patient045D  | Patient238   |
| 20907 | Patient058   | Patient131   |
| 20907 | Patient069   | Patient192A  |
| 20907 | Patient093C  | Patient180   |
| 20907 | Patient100B  | Patient183B  |
| 20907 | Patient100B  | Patient241   |
| 20907 | Patient145C  | Patient189C1 |
| 20907 | Patient171   | Patient232B  |
| 20907 | Patient193   | Patient236B  |
| 20907 | Patient193   | Patient252D  |
| 20908 | Patient029   | Patient032B  |
| 20908 | Patient029   | Patient034C  |
| 20908 | Patient029   | Patient123A  |
| 20908 | Patient045A  | Patient238   |
| 20908 | Patient069   | Patient093B  |
| 20908 | Patient081A2 | Patient100B  |
| 20908 | Patient081F  | Patient100B  |
| 20908 | Patient089A1 | Patient126D  |
| 20908 | Patient100B  | Patient247A  |
| 20908 | Patient100B  | Patient247B  |

|       |              |              |
|-------|--------------|--------------|
| 20908 | Patient193   | Patient222B  |
| 20908 | Patient205   | Patient238   |
| 20909 | Patient029   | Patient032A  |
| 20909 | Patient029   | Patient034A  |
| 20909 | Patient029   | Patient092G  |
| 20909 | Patient029   | Patient094E  |
| 20909 | Patient029   | Patient123C  |
| 20909 | Patient058   | Patient213A  |
| 20909 | Patient089A2 | Patient242   |
| 20909 | Patient092E  | Patient100B  |
| 20909 | Patient094D  | Patient238   |
| 20909 | Patient100B  | Patient192C  |
| 20909 | Patient127A  | Patient193   |
| 20909 | Patient171   | Patient232C  |
| 20910 | Patient013   | Patient258C1 |
| 20910 | Patient013   | Patient258C2 |
| 20910 | Patient029   | Patient092H  |
| 20910 | Patient045B  | Patient238   |
| 20910 | Patient088   | Patient213A  |
| 20910 | Patient164   | Patient238   |
| 20911 | Patient029   | Patient081D  |
| 20911 | Patient029   | Patient123B  |
| 20911 | Patient029   | Patient217A  |
| 20911 | Patient069   | Patient192B  |
| 20911 | Patient069   | Patient206   |
| 20911 | Patient100B  | Patient183E  |
| 20911 | Patient100B  | Patient246A  |
| 20911 | Patient128   | Patient258C2 |
| 20911 | Patient150C  | Patient189C2 |
| 20911 | Patient192D  | Patient238   |
| 20912 | Patient045C  | Patient238   |
| 20912 | Patient058   | Patient242   |
| 20912 | Patient069   | Patient094D  |
| 20912 | Patient081A1 | Patient100B  |
| 20912 | Patient088   | Patient126E  |
| 20912 | Patient088   | Patient242   |
| 20912 | Patient089A2 | Patient213A  |
| 20912 | Patient100B  | Patient247E  |
| 20912 | Patient128   | Patient258C1 |
| 20912 | Patient150A  | Patient189C2 |
| 20912 | Patient150C  | Patient189C1 |
| 20913 | Patient029   | Patient123D  |
| 20913 | Patient032A  | Patient189C2 |
| 20913 | Patient053C  | Patient069   |
| 20913 | Patient089A1 | Patient232D  |
| 20913 | Patient089A1 | Patient232E  |
| 20913 | Patient089A2 | Patient126E  |
| 20913 | Patient100B  | Patient183C  |
| 20913 | Patient100B  | Patient192E  |
| 20913 | Patient150A  | Patient189C1 |

|       |              |              |
|-------|--------------|--------------|
| 20913 | Patient206   | Patient238   |
| 20914 | Patient026D  | Patient029   |
| 20914 | Patient032B  | Patient189C2 |
| 20914 | Patient034C  | Patient189C2 |
| 20914 | Patient100B  | Patient157   |
| 20914 | Patient100B  | Patient192F  |
| 20914 | Patient127B  | Patient193   |
| 20914 | Patient141D  | Patient189C2 |
| 20914 | Patient171   | Patient206   |
| 20914 | Patient179   | Patient205   |
| 20914 | Patient193   | Patient196A  |
| 20915 | Patient029   | Patient034E  |
| 20915 | Patient029   | Patient217I  |
| 20915 | Patient034A  | Patient189C2 |
| 20915 | Patient069   | Patient092E  |
| 20915 | Patient069   | Patient192C  |
| 20915 | Patient069   | Patient205   |
| 20915 | Patient089A1 | Patient232A  |
| 20916 | Patient026E  | Patient029   |
| 20916 | Patient029   | Patient205   |
| 20916 | Patient029   | Patient217B  |
| 20916 | Patient029   | Patient217H  |
| 20916 | Patient053B  | Patient069   |
| 20916 | Patient089A1 | Patient232B  |
| 20916 | Patient092A  | Patient100B  |
| 20916 | Patient092C  | Patient233   |
| 20916 | Patient114   | Patient196D  |
| 20916 | Patient180   | Patient205   |
| 20916 | Patient189C1 | Patient220B  |
| 20916 | Patient189C2 | Patient220B  |
| 20916 | Patient193   | Patient246C  |
| 20917 | Patient029   | Patient034B  |
| 20917 | Patient029   | Patient034D  |
| 20917 | Patient029   | Patient217C  |
| 20917 | Patient029   | Patient217D  |
| 20917 | Patient029   | Patient217F  |
| 20917 | Patient053A2 | Patient069   |
| 20917 | Patient126E  | Patient193   |
| 20917 | Patient193   | Patient201E  |
| 20917 | Patient193   | Patient218A  |
| 20918 | Patient032A  | Patient189C1 |
| 20918 | Patient045D  | Patient193   |
| 20918 | Patient089A1 | Patient232C  |
| 20918 | Patient089A1 | Patient258E  |
| 20918 | Patient093B  | Patient179   |
| 20918 | Patient094E  | Patient238   |
| 20918 | Patient141D  | Patient189C1 |
| 20918 | Patient179   | Patient222C  |
| 20919 | Patient029   | Patient099E  |
| 20919 | Patient032B  | Patient189C1 |

|       |              |              |
|-------|--------------|--------------|
| 20919 | Patient034C  | Patient189C1 |
| 20919 | Patient069   | Patient192E  |
| 20919 | Patient150B  | Patient171   |
| 20920 | Patient029   | Patient126E  |
| 20920 | Patient029   | Patient217E  |
| 20920 | Patient034A  | Patient189C1 |
| 20920 | Patient034E  | Patient189C2 |
| 20920 | Patient069   | Patient094E  |
| 20920 | Patient093B  | Patient100B  |
| 20920 | Patient193   | Patient196C  |
| 20920 | Patient193   | Patient196E  |
| 20920 | Patient193   | Patient201A  |
| 20920 | Patient193   | Patient222D  |
| 20920 | Patient193   | Patient236A  |
| 20921 | Patient069   | Patient092A  |
| 20921 | Patient092B  | Patient100B  |
| 20921 | Patient184   | Patient193   |
| 20921 | Patient187   | Patient193   |
| 20921 | Patient193   | Patient222E  |
| 20921 | Patient193   | Patient222F  |
| 20921 | Patient193   | Patient246E  |
| 20922 | Patient029   | Patient164   |
| 20922 | Patient034D  | Patient189C2 |
| 20922 | Patient069   | Patient192F  |
| 20922 | Patient088   | Patient126D  |
| 20922 | Patient089A1 | Patient108B2 |
| 20922 | Patient094D  | Patient179   |
| 20923 | Patient029   | Patient189B  |
| 20923 | Patient034B  | Patient189C2 |
| 20923 | Patient058   | Patient126E  |
| 20923 | Patient089A2 | Patient126D  |
| 20923 | Patient092C  | Patient215   |
| 20923 | Patient094D  | Patient100B  |
| 20923 | Patient099B  | Patient193   |
| 20923 | Patient100B  | Patient141A  |
| 20923 | Patient100B  | Patient141B  |
| 20923 | Patient171   | Patient241   |
| 20923 | Patient193   | Patient246B  |
| 20923 | Patient193   | Patient246D  |
| 20924 | Patient100B  | Patient141C  |
| 20924 | Patient161B  | Patient189C2 |
| 20924 | Patient193   | Patient196B  |
| 20925 | Patient029   | Patient159   |
| 20925 | Patient029   | Patient189A  |
| 20925 | Patient029   | Patient213B  |
| 20925 | Patient034E  | Patient189C1 |
| 20925 | Patient053A1 | Patient058   |
| 20925 | Patient069   | Patient092B  |
| 20925 | Patient099A  | Patient193   |
| 20925 | Patient161B  | Patient189C1 |



|       |              |              |
|-------|--------------|--------------|
| 20925 | Patient180   | Patient222C  |
| 20925 | Patient193   | Patient218B  |
| 20926 | Patient029   | Patient189E  |
| 20926 | Patient029   | Patient217J  |
| 20926 | Patient088   | Patient232D  |
| 20926 | Patient088   | Patient232E  |
| 20926 | Patient089A1 | Patient108B1 |
| 20926 | Patient093B  | Patient180   |
| 20926 | Patient100B  | Patient230A  |
| 20927 | Patient034D  | Patient189C1 |
| 20927 | Patient053A1 | Patient089A2 |
| 20927 | Patient086C  | Patient189C2 |
| 20927 | Patient089A1 | Patient206   |
| 20927 | Patient089A2 | Patient232D  |
| 20927 | Patient089A2 | Patient232E  |
| 20927 | Patient099C  | Patient193   |
| 20927 | Patient121A  | Patient189C2 |
| 20927 | Patient150B  | Patient189C2 |
| 20928 | Patient029   | Patient192A  |
| 20928 | Patient034B  | Patient189C1 |
| 20928 | Patient053A1 | Patient088   |
| 20928 | Patient069   | Patient177   |
| 20928 | Patient088   | Patient232A  |
| 20928 | Patient092G  | Patient171   |
| 20928 | Patient099D  | Patient193   |
| 20928 | Patient150B  | Patient189C1 |
| 20928 | Patient179   | Patient196F  |
| 20928 | Patient179   | Patient263A  |
| 20928 | Patient193   | Patient220A  |
| 20929 | Patient029   | Patient241   |
| 20929 | Patient088   | Patient232B  |
| 20929 | Patient089A2 | Patient232A  |
| 20929 | Patient177   | Patient180   |
| 20929 | Patient179   | Patient206   |
| 20929 | Patient189B  | Patient193   |
| 20929 | Patient230A  | Patient238   |
| 20929 | Patient238   | Patient242   |
| 20930 | Patient088   | Patient232C  |
| 20930 | Patient089A2 | Patient232B  |
| 20930 | Patient092H  | Patient171   |
| 20930 | Patient114   | Patient258F  |
| 20930 | Patient126E  | Patient238   |
| 20930 | Patient189A  | Patient193   |
| 20931 | Patient007A  | Patient189C1 |
| 20931 | Patient022B  | Patient089A1 |
| 20931 | Patient026D  | Patient100B  |
| 20931 | Patient029   | Patient053C  |
| 20931 | Patient053C  | Patient171   |
| 20931 | Patient069   | Patient099E  |
| 20931 | Patient069   | Patient189A  |

|       |              |              |
|-------|--------------|--------------|
| 20931 | Patient069   | Patient189B  |
| 20931 | Patient086C  | Patient189C1 |
| 20931 | Patient094E  | Patient179   |
| 20931 | Patient121B  | Patient189C2 |
| 20931 | Patient177   | Patient179   |
| 20931 | Patient193   | Patient232D  |
| 20931 | Patient193   | Patient232E  |
| 20931 | Patient193   | Patient263B  |
| 20931 | Patient193   | Patient265   |
| 20932 | Patient026A  | Patient238   |
| 20932 | Patient029   | Patient192B  |
| 20932 | Patient058   | Patient126D  |
| 20932 | Patient089A2 | Patient232C  |
| 20932 | Patient094D  | Patient180   |
| 20932 | Patient094E  | Patient100B  |
| 20932 | Patient099E  | Patient238   |
| 20932 | Patient121A  | Patient189C1 |
| 20932 | Patient131   | Patient189C1 |
| 20932 | Patient189E  | Patient193   |
| 20933 | Patient029   | Patient053B  |
| 20933 | Patient029   | Patient092E  |
| 20933 | Patient108B2 | Patient189C1 |
| 20933 | Patient131   | Patient189C2 |
| 20933 | Patient141A  | Patient238   |
| 20933 | Patient141B  | Patient238   |
| 20933 | Patient171   | Patient258E  |
| 20933 | Patient193   | Patient232A  |
| 20934 | Patient007A  | Patient189C2 |
| 20934 | Patient026E  | Patient100B  |
| 20934 | Patient029   | Patient081B  |
| 20934 | Patient029   | Patient201B  |
| 20934 | Patient029   | Patient222A  |
| 20934 | Patient029   | Patient232E  |
| 20934 | Patient053B  | Patient171   |
| 20934 | Patient069   | Patient189E  |
| 20934 | Patient103D  | Patient114   |
| 20934 | Patient108B1 | Patient189C1 |
| 20934 | Patient108B2 | Patient189C2 |
| 20934 | Patient180   | Patient206   |
| 20934 | Patient193   | Patient232B  |
| 20935 | Patient029   | Patient053A2 |
| 20935 | Patient029   | Patient232D  |
| 20935 | Patient053A2 | Patient171   |
| 20935 | Patient054   | Patient238   |
| 20935 | Patient088   | Patient108B2 |
| 20935 | Patient100B  | Patient103A  |
| 20935 | Patient100B  | Patient220B  |
| 20935 | Patient108B1 | Patient189C2 |
| 20935 | Patient114   | Patient258A2 |
| 20935 | Patient114   | Patient258B  |

|       |              |              |
|-------|--------------|--------------|
| 20935 | Patient141C  | Patient238   |
| 20935 | Patient149B  | Patient193   |
| 20935 | Patient180   | Patient196F  |
| 20935 | Patient193   | Patient232C  |
| 20936 | Patient023   | Patient089A1 |
| 20936 | Patient026B  | Patient238   |
| 20936 | Patient026F  | Patient238   |
| 20936 | Patient029   | Patient081E  |
| 20936 | Patient029   | Patient192C  |
| 20936 | Patient029   | Patient232A  |
| 20936 | Patient086A  | Patient189C2 |
| 20936 | Patient089A2 | Patient108B2 |
| 20936 | Patient114   | Patient258A1 |
| 20936 | Patient121B  | Patient189C1 |
| 20936 | Patient159   | Patient238   |
| 20936 | Patient171   | Patient222C  |
| 20936 | Patient180   | Patient263A  |
| 20936 | Patient213B  | Patient238   |
| 20936 | Patient230D  | Patient238   |
| 20937 | Patient007B  | Patient189C1 |
| 20937 | Patient029   | Patient222B  |
| 20937 | Patient029   | Patient232B  |
| 20937 | Patient045A  | Patient100B  |
| 20937 | Patient058   | Patient232E  |
| 20937 | Patient069   | Patient126E  |
| 20937 | Patient069   | Patient159   |
| 20937 | Patient069   | Patient213B  |
| 20937 | Patient086E  | Patient189C2 |
| 20937 | Patient103D  | Patient193   |
| 20937 | Patient114   | Patient258E  |
| 20938 | Patient029   | Patient177   |
| 20938 | Patient058   | Patient232D  |
| 20938 | Patient058   | Patient258E  |
| 20938 | Patient100B  | Patient230B  |
| 20938 | Patient103E  | Patient114   |
| 20938 | Patient128   | Patient198   |
| 20938 | Patient189B  | Patient238   |
| 20939 | Patient022B  | Patient193   |
| 20939 | Patient029   | Patient081A2 |
| 20939 | Patient029   | Patient081F  |
| 20939 | Patient029   | Patient127A  |
| 20939 | Patient029   | Patient232C  |
| 20939 | Patient029   | Patient236B  |
| 20939 | Patient058   | Patient232A  |
| 20939 | Patient088   | Patient108B1 |
| 20939 | Patient094E  | Patient180   |
| 20939 | Patient100B  | Patient177   |
| 20939 | Patient114   | Patient258D  |
| 20939 | Patient173B  | Patient238   |
| 20940 | Patient007B  | Patient189C2 |

|       |              |              |
|-------|--------------|--------------|
| 20940 | Patient029   | Patient192E  |
| 20940 | Patient045B  | Patient100B  |
| 20940 | Patient058   | Patient232B  |
| 20940 | Patient086A  | Patient189C1 |
| 20940 | Patient086B  | Patient189C2 |
| 20940 | Patient089A1 | Patient217A  |
| 20940 | Patient089A2 | Patient108B1 |
| 20940 | Patient089A2 | Patient258E  |
| 20940 | Patient100B  | Patient242   |
| 20940 | Patient114   | Patient206   |
| 20940 | Patient114   | Patient258G  |
| 20940 | Patient189A  | Patient238   |
| 20941 | Patient026C  | Patient089A1 |
| 20941 | Patient086E  | Patient189C1 |
| 20941 | Patient089A1 | Patient220B  |
| 20941 | Patient103E  | Patient193   |
| 20941 | Patient189E  | Patient238   |
| 20942 | Patient029   | Patient092A  |
| 20942 | Patient045C  | Patient100B  |
| 20942 | Patient058   | Patient232C  |
| 20942 | Patient069   | Patient201B  |
| 20942 | Patient126E  | Patient179   |
| 20942 | Patient171   | Patient213A  |
| 20942 | Patient193   | Patient258F  |
| 20942 | Patient230B  | Patient238   |
| 20942 | Patient232E  | Patient238   |
| 20943 | Patient029   | Patient054   |
| 20943 | Patient029   | Patient127B  |
| 20943 | Patient029   | Patient192F  |
| 20943 | Patient029   | Patient252D  |
| 20943 | Patient086B  | Patient189C1 |
| 20943 | Patient171   | Patient196F  |
| 20943 | Patient232D  | Patient238   |
| 20943 | Patient235F  | Patient238   |
| 20944 | Patient023   | Patient088   |
| 20944 | Patient029   | Patient081A1 |
| 20944 | Patient069   | Patient121B  |
| 20944 | Patient128   | Patient152A  |
| 20944 | Patient128   | Patient152B  |
| 20944 | Patient193   | Patient206   |
| 20944 | Patient232A  | Patient238   |
| 20945 | Patient029   | Patient092B  |
| 20945 | Patient088   | Patient258E  |
| 20945 | Patient089A1 | Patient217B  |
| 20945 | Patient089A1 | Patient217H  |
| 20945 | Patient089A1 | Patient217I  |
| 20945 | Patient193   | Patient258A1 |
| 20945 | Patient222A  | Patient238   |
| 20945 | Patient222B  | Patient238   |
| 20945 | Patient232B  | Patient238   |

|       |              |              |
|-------|--------------|--------------|
| 20945 | Patient235E  | Patient238   |
| 20946 | Patient069   | Patient121A  |
| 20946 | Patient069   | Patient222A  |
| 20946 | Patient069   | Patient222B  |
| 20946 | Patient089A1 | Patient217C  |
| 20946 | Patient089A1 | Patient217D  |
| 20946 | Patient089A1 | Patient217F  |
| 20946 | Patient171   | Patient263A  |
| 20946 | Patient193   | Patient258A2 |
| 20946 | Patient193   | Patient258B  |
| 20947 | Patient007A  | Patient029   |
| 20947 | Patient029   | Patient192D  |
| 20947 | Patient029   | Patient196A  |
| 20947 | Patient029   | Patient218A  |
| 20947 | Patient069   | Patient232D  |
| 20947 | Patient069   | Patient236B  |
| 20947 | Patient100B  | Patient126E  |
| 20947 | Patient193   | Patient196D  |
| 20947 | Patient201B  | Patient238   |
| 20947 | Patient232C  | Patient238   |
| 20948 | Patient069   | Patient232E  |
| 20949 | Patient013   | Patient089A1 |
| 20949 | Patient029   | Patient099A  |
| 20949 | Patient029   | Patient099B  |
| 20949 | Patient029   | Patient206   |
| 20949 | Patient058   | Patient206   |
| 20949 | Patient089A1 | Patient217E  |
| 20949 | Patient099E  | Patient100B  |
| 20949 | Patient100B  | Patient213B  |
| 20949 | Patient189C1 | Patient230D  |
| 20949 | Patient189C2 | Patient230D  |
| 20949 | Patient230F  | Patient238   |
| 20950 | Patient023   | Patient089A2 |
| 20950 | Patient029   | Patient184   |
| 20950 | Patient029   | Patient201E  |
| 20950 | Patient029   | Patient222E  |
| 20950 | Patient029   | Patient222F  |
| 20950 | Patient058   | Patient108B2 |
| 20950 | Patient069   | Patient127A  |
| 20950 | Patient069   | Patient232A  |
| 20950 | Patient069   | Patient232B  |
| 20950 | Patient092C  | Patient258C1 |
| 20950 | Patient092C  | Patient258C2 |
| 20950 | Patient100B  | Patient159   |
| 20950 | Patient100B  | Patient230F  |
| 20950 | Patient126E  | Patient180   |
| 20950 | Patient193   | Patient258D  |
| 20950 | Patient193   | Patient258E  |
| 20951 | Patient013   | Patient058   |
| 20951 | Patient026A  | Patient100B  |

|       |              |              |
|-------|--------------|--------------|
| 20951 | Patient029   | Patient187   |
| 20951 | Patient029   | Patient201A  |
| 20951 | Patient029   | Patient236A  |
| 20951 | Patient058   | Patient108B1 |
| 20951 | Patient069   | Patient252D  |
| 20951 | Patient100B  | Patient230D  |
| 20951 | Patient100B  | Patient230E  |
| 20951 | Patient103A  | Patient238   |
| 20951 | Patient193   | Patient258G  |
| 20952 | Patient007B  | Patient029   |
| 20952 | Patient029   | Patient045A  |
| 20952 | Patient029   | Patient196C  |
| 20952 | Patient029   | Patient196E  |
| 20952 | Patient029   | Patient222D  |
| 20952 | Patient069   | Patient232C  |
| 20952 | Patient089A2 | Patient206   |
| 20952 | Patient092E  | Patient171   |
| 20953 | Patient022B  | Patient088   |
| 20953 | Patient022B  | Patient089A2 |
| 20953 | Patient029   | Patient099C  |
| 20953 | Patient058   | Patient220B  |
| 20953 | Patient127A  | Patient238   |
| 20953 | Patient145A  | Patient171   |
| 20953 | Patient230E  | Patient238   |
| 20953 | Patient238   | Patient252D  |
| 20954 | Patient100B  | Patient126C  |
| 20954 | Patient126D  | Patient189C1 |
| 20954 | Patient126D  | Patient189C2 |
| 20954 | Patient179   | Patient232E  |
| 20955 | Patient007A  | Patient193   |
| 20955 | Patient029   | Patient045B  |
| 20955 | Patient029   | Patient099D  |
| 20955 | Patient029   | Patient220A  |
| 20955 | Patient069   | Patient258F  |
| 20955 | Patient088   | Patient206   |
| 20955 | Patient089A1 | Patient217J  |
| 20955 | Patient100B  | Patient161B  |
| 20955 | Patient179   | Patient232D  |
| 20956 | Patient026B  | Patient100B  |
| 20956 | Patient029   | Patient196B  |
| 20956 | Patient029   | Patient218B  |
| 20956 | Patient066D  | Patient238   |
| 20956 | Patient069   | Patient127B  |
| 20956 | Patient069   | Patient196A  |
| 20956 | Patient100B  | Patient173B  |
| 20956 | Patient100B  | Patient202   |
| 20956 | Patient179   | Patient232A  |
| 20956 | Patient196A  | Patient238   |
| 20956 | Patient236B  | Patient238   |
| 20957 | Patient029   | Patient045C  |

|       |              |              |
|-------|--------------|--------------|
| 20957 | Patient054   | Patient179   |
| 20957 | Patient069   | Patient218A  |
| 20957 | Patient069   | Patient246C  |
| 20957 | Patient127B  | Patient238   |
| 20957 | Patient171   | Patient217A  |
| 20957 | Patient179   | Patient232B  |
| 20957 | Patient218A  | Patient238   |
| 20958 | Patient026F  | Patient100B  |
| 20958 | Patient054   | Patient069   |
| 20958 | Patient054   | Patient180   |
| 20958 | Patient069   | Patient103A  |
| 20958 | Patient069   | Patient196C  |
| 20958 | Patient069   | Patient201E  |
| 20958 | Patient089A1 | Patient222C  |
| 20958 | Patient100B  | Patient201B  |
| 20959 | Patient007B  | Patient193   |
| 20959 | Patient029   | Patient265   |
| 20959 | Patient066E  | Patient238   |
| 20959 | Patient069   | Patient187   |
| 20959 | Patient069   | Patient201A  |
| 20959 | Patient069   | Patient246E  |
| 20959 | Patient069   | Patient258A1 |
| 20959 | Patient069   | Patient258A2 |
| 20959 | Patient069   | Patient258B  |
| 20959 | Patient081C  | Patient114   |
| 20959 | Patient145C  | Patient171   |
| 20959 | Patient171   | Patient242   |
| 20959 | Patient179   | Patient232C  |
| 20960 | Patient007A  | Patient114   |
| 20960 | Patient054   | Patient100B  |
| 20960 | Patient069   | Patient196E  |
| 20960 | Patient092A  | Patient171   |
| 20960 | Patient099A  | Patient238   |
| 20960 | Patient099B  | Patient238   |
| 20960 | Patient184   | Patient238   |
| 20960 | Patient201E  | Patient238   |
| 20960 | Patient238   | Patient246C  |
| 20961 | Patient013   | Patient088   |
| 20961 | Patient023   | Patient058   |
| 20961 | Patient029   | Patient242   |
| 20961 | Patient029   | Patient263B  |
| 20961 | Patient069   | Patient099A  |
| 20961 | Patient069   | Patient099B  |
| 20961 | Patient069   | Patient184   |
| 20961 | Patient069   | Patient192D  |
| 20961 | Patient069   | Patient222D  |
| 20961 | Patient100B  | Patient222A  |
| 20961 | Patient120A  | Patient238   |
| 20961 | Patient171   | Patient217I  |
| 20961 | Patient187   | Patient238   |

|       |              |              |
|-------|--------------|--------------|
| 20961 | Patient201A  | Patient238   |
| 20961 | Patient222D  | Patient238   |
| 20961 | Patient238   | Patient246E  |
| 20962 | Patient058   | Patient217A  |
| 20962 | Patient066F  | Patient238   |
| 20962 | Patient069   | Patient222F  |
| 20962 | Patient069   | Patient236A  |
| 20962 | Patient100B  | Patient127A  |
| 20962 | Patient100B  | Patient232D  |
| 20962 | Patient100B  | Patient232E  |
| 20962 | Patient141D  | Patient171   |
| 20962 | Patient171   | Patient217B  |
| 20962 | Patient171   | Patient217H  |
| 20962 | Patient180   | Patient232E  |
| 20962 | Patient196C  | Patient238   |
| 20962 | Patient196E  | Patient238   |
| 20962 | Patient222E  | Patient238   |
| 20962 | Patient222F  | Patient238   |
| 20963 | Patient007B  | Patient114   |
| 20963 | Patient013   | Patient089A2 |
| 20963 | Patient026C  | Patient058   |
| 20963 | Patient069   | Patient218B  |
| 20963 | Patient069   | Patient222E  |
| 20963 | Patient069   | Patient246B  |
| 20963 | Patient069   | Patient246D  |
| 20963 | Patient069   | Patient258D  |
| 20963 | Patient088   | Patient220B  |
| 20963 | Patient089A2 | Patient217A  |
| 20963 | Patient114   | Patient192D  |
| 20963 | Patient114   | Patient217A  |
| 20963 | Patient123A  | Patient171   |
| 20963 | Patient171   | Patient217C  |
| 20963 | Patient171   | Patient217D  |
| 20963 | Patient171   | Patient217F  |
| 20963 | Patient180   | Patient232B  |
| 20963 | Patient180   | Patient232D  |
| 20963 | Patient238   | Patient246B  |
| 20964 | Patient022B  | Patient058   |
| 20964 | Patient026C  | Patient088   |
| 20964 | Patient026C  | Patient089A2 |
| 20964 | Patient026C  | Patient171   |
| 20964 | Patient029   | Patient100A  |
| 20964 | Patient032D  | Patient215   |
| 20964 | Patient069   | Patient196B  |
| 20964 | Patient069   | Patient220A  |
| 20964 | Patient069   | Patient258G  |
| 20964 | Patient081C  | Patient193   |
| 20964 | Patient092B  | Patient171   |
| 20964 | Patient099C  | Patient238   |
| 20964 | Patient100B  | Patient103D  |



|       |              |             |
|-------|--------------|-------------|
| 20964 | Patient100B  | Patient120A |
| 20964 | Patient100B  | Patient222B |
| 20964 | Patient100B  | Patient232A |
| 20964 | Patient123C  | Patient171  |
| 20964 | Patient161B  | Patient238  |
| 20964 | Patient180   | Patient232A |
| 20965 | Patient029   | Patient149B |
| 20965 | Patient069   | Patient099C |
| 20965 | Patient069   | Patient202  |
| 20965 | Patient089A2 | Patient220B |
| 20965 | Patient100B  | Patient232B |
| 20965 | Patient179   | Patient258F |
| 20965 | Patient236A  | Patient238  |
| 20966 | Patient028   | Patient215  |
| 20966 | Patient058   | Patient217I |
| 20966 | Patient088   | Patient217A |
| 20966 | Patient089A1 | Patient196F |
| 20966 | Patient100B  | Patient236B |
| 20966 | Patient100B  | Patient252D |
| 20966 | Patient123B  | Patient171  |
| 20966 | Patient171   | Patient217E |
| 20966 | Patient171   | Patient261A |
| 20966 | Patient193   | Patient202  |
| 20966 | Patient196B  | Patient238  |
| 20966 | Patient218B  | Patient238  |
| 20966 | Patient220A  | Patient238  |
| 20966 | Patient238   | Patient246D |
| 20967 | Patient029   | Patient230A |
| 20967 | Patient058   | Patient217B |
| 20967 | Patient058   | Patient217H |
| 20967 | Patient069   | Patient099D |
| 20967 | Patient089A2 | Patient217I |
| 20967 | Patient099D  | Patient238  |
| 20967 | Patient100B  | Patient232C |
| 20967 | Patient100B  | Patient235F |
| 20967 | Patient180   | Patient232C |
| 20968 | Patient022B  | Patient238  |
| 20968 | Patient029   | Patient141A |
| 20968 | Patient029   | Patient141B |
| 20968 | Patient058   | Patient217C |
| 20968 | Patient058   | Patient217D |
| 20968 | Patient058   | Patient217F |
| 20968 | Patient089A2 | Patient217B |
| 20968 | Patient089A2 | Patient217H |
| 20968 | Patient100B  | Patient103E |
| 20968 | Patient100B  | Patient127B |
| 20968 | Patient100B  | Patient196A |
| 20968 | Patient114   | Patient217F |
| 20968 | Patient114   | Patient217I |
| 20968 | Patient123D  | Patient171  |

|       |              |              |
|-------|--------------|--------------|
| 20969 | Patient029   | Patient230D  |
| 20969 | Patient032D  | Patient152B  |
| 20969 | Patient081D  | Patient114   |
| 20969 | Patient089A2 | Patient217C  |
| 20969 | Patient089A2 | Patient217D  |
| 20969 | Patient089A2 | Patient217F  |
| 20969 | Patient100B  | Patient235E  |
| 20969 | Patient114   | Patient217B  |
| 20969 | Patient114   | Patient217H  |
| 20969 | Patient150C  | Patient238   |
| 20969 | Patient179   | Patient258A1 |
| 20970 | Patient029   | Patient141C  |
| 20970 | Patient045D  | Patient089A1 |
| 20970 | Patient088   | Patient217F  |
| 20970 | Patient088   | Patient217I  |
| 20970 | Patient114   | Patient217C  |
| 20970 | Patient114   | Patient217D  |
| 20970 | Patient146   | Patient152B  |
| 20970 | Patient179   | Patient258A2 |
| 20970 | Patient179   | Patient258B  |
| 20970 | Patient193   | Patient217A  |
| 20971 | Patient032D  | Patient152A  |
| 20971 | Patient058   | Patient217E  |
| 20971 | Patient066D  | Patient100B  |
| 20971 | Patient088   | Patient217B  |
| 20971 | Patient088   | Patient217H  |
| 20971 | Patient100B  | Patient184   |
| 20971 | Patient150A  | Patient238   |
| 20971 | Patient171   | Patient220B  |
| 20972 | Patient069   | Patient265   |
| 20972 | Patient088   | Patient217C  |
| 20972 | Patient088   | Patient217D  |
| 20972 | Patient089A2 | Patient217E  |
| 20972 | Patient089A2 | Patient222C  |
| 20972 | Patient100A  | Patient238   |
| 20972 | Patient100B  | Patient121A  |
| 20972 | Patient100B  | Patient121B  |
| 20972 | Patient100B  | Patient201E  |
| 20972 | Patient100B  | Patient218A  |
| 20972 | Patient171   | Patient217J  |
| 20973 | Patient069   | Patient149B  |
| 20973 | Patient069   | Patient263B  |
| 20973 | Patient088   | Patient222C  |
| 20973 | Patient089A1 | Patient121A  |
| 20973 | Patient089A1 | Patient263A  |
| 20973 | Patient114   | Patient217E  |
| 20973 | Patient121B  | Patient238   |
| 20973 | Patient179   | Patient258D  |
| 20973 | Patient180   | Patient258F  |
| 20973 | Patient238   | Patient263B  |

|       |              |              |
|-------|--------------|--------------|
| 20973 | Patient238   | Patient265   |
| 20974 | Patient007A  | Patient179   |
| 20974 | Patient026A  | Patient029   |
| 20974 | Patient066E  | Patient100B  |
| 20974 | Patient069   | Patient235E  |
| 20974 | Patient069   | Patient235F  |
| 20974 | Patient081D  | Patient193   |
| 20974 | Patient100B  | Patient187   |
| 20974 | Patient100B  | Patient201A  |
| 20974 | Patient121A  | Patient238   |
| 20974 | Patient179   | Patient258G  |
| 20974 | Patient193   | Patient217I  |
| 20975 | Patient013   | Patient233   |
| 20975 | Patient026C  | Patient114   |
| 20975 | Patient088   | Patient217E  |
| 20975 | Patient099A  | Patient100B  |
| 20975 | Patient099B  | Patient100B  |
| 20975 | Patient100B  | Patient196C  |
| 20975 | Patient100B  | Patient196E  |
| 20975 | Patient100B  | Patient246C  |
| 20975 | Patient146   | Patient152A  |
| 20975 | Patient171   | Patient261B  |
| 20975 | Patient193   | Patient217B  |
| 20975 | Patient193   | Patient217H  |
| 20976 | Patient022B  | Patient100B  |
| 20976 | Patient032B  | Patient171   |
| 20976 | Patient100B  | Patient222D  |
| 20976 | Patient149B  | Patient238   |
| 20976 | Patient193   | Patient217C  |
| 20976 | Patient193   | Patient217D  |
| 20976 | Patient193   | Patient217F  |
| 20976 | Patient213A  | Patient238   |
| 20977 | Patient026B  | Patient029   |
| 20977 | Patient032D  | Patient233   |
| 20977 | Patient034C  | Patient171   |
| 20977 | Patient058   | Patient217J  |
| 20977 | Patient089A1 | Patient121B  |
| 20977 | Patient100B  | Patient236A  |
| 20977 | Patient100B  | Patient246E  |
| 20977 | Patient180   | Patient258A1 |
| 20977 | Patient180   | Patient258A2 |
| 20977 | Patient180   | Patient258B  |
| 20978 | Patient007B  | Patient179   |
| 20978 | Patient026F  | Patient029   |
| 20978 | Patient032A  | Patient171   |
| 20978 | Patient034A  | Patient171   |
| 20978 | Patient066F  | Patient100B  |
| 20978 | Patient089A2 | Patient217J  |
| 20978 | Patient100B  | Patient222E  |
| 20978 | Patient100B  | Patient222F  |

|       |              |              |
|-------|--------------|--------------|
| 20979 | Patient029   | Patient196D  |
| 20979 | Patient081B  | Patient114   |
| 20979 | Patient099C  | Patient100B  |
| 20979 | Patient100B  | Patient131   |
| 20979 | Patient100B  | Patient196B  |
| 20979 | Patient100B  | Patient246B  |
| 20979 | Patient114   | Patient217J  |
| 20979 | Patient171   | Patient261D  |
| 20979 | Patient193   | Patient217E  |
| 20980 | Patient029   | Patient230B  |
| 20980 | Patient081E  | Patient114   |
| 20980 | Patient089A2 | Patient196F  |
| 20980 | Patient100B  | Patient218B  |
| 20981 | Patient088   | Patient196F  |
| 20981 | Patient088   | Patient217J  |
| 20981 | Patient099D  | Patient100B  |
| 20981 | Patient100B  | Patient220A  |
| 20981 | Patient100B  | Patient246D  |
| 20981 | Patient103D  | Patient238   |
| 20981 | Patient131   | Patient171   |
| 20981 | Patient180   | Patient258D  |
| 20982 | Patient058   | Patient222C  |
| 20982 | Patient180   | Patient258G  |
| 20983 | Patient029   | Patient103A  |
| 20983 | Patient034E  | Patient171   |
| 20983 | Patient100B  | Patient235A  |
| 20983 | Patient128   | Patient208   |
| 20984 | Patient081A2 | Patient114   |
| 20984 | Patient081F  | Patient114   |
| 20984 | Patient150B  | Patient238   |
| 20985 | Patient022B  | Patient180   |
| 20985 | Patient034B  | Patient171   |
| 20985 | Patient034D  | Patient171   |
| 20985 | Patient045D  | Patient089A2 |
| 20985 | Patient045D  | Patient189C2 |
| 20985 | Patient081B  | Patient193   |
| 20985 | Patient081E  | Patient193   |
| 20985 | Patient089A2 | Patient263A  |
| 20985 | Patient103E  | Patient238   |
| 20985 | Patient146   | Patient215   |
| 20985 | Patient193   | Patient217J  |
| 20986 | Patient026C  | Patient193   |
| 20986 | Patient029   | Patient131   |
| 20986 | Patient029   | Patient230F  |
| 20986 | Patient045D  | Patient088   |
| 20986 | Patient088   | Patient263A  |
| 20986 | Patient100B  | Patient263B  |
| 20986 | Patient100B  | Patient265   |
| 20986 | Patient146   | Patient198   |
| 20987 | Patient092C  | Patient152B  |

|       |              |              |
|-------|--------------|--------------|
| 20987 | Patient196D  | Patient238   |
| 20988 | Patient045D  | Patient058   |
| 20988 | Patient045D  | Patient189C1 |
| 20988 | Patient069   | Patient103D  |
| 20988 | Patient100B  | Patient149B  |
| 20988 | Patient100B  | Patient224B  |
| 20988 | Patient215   | Patient263A  |
| 20989 | Patient029   | Patient230E  |
| 20989 | Patient029   | Patient235F  |
| 20989 | Patient032D  | Patient198   |
| 20989 | Patient058   | Patient121A  |
| 20989 | Patient058   | Patient196F  |
| 20989 | Patient069   | Patient196D  |
| 20989 | Patient081A1 | Patient114   |
| 20989 | Patient081A2 | Patient193   |
| 20989 | Patient081F  | Patient193   |
| 20989 | Patient103A  | Patient189C2 |
| 20989 | Patient114   | Patient213A  |
| 20990 | Patient092C  | Patient152A  |
| 20991 | Patient022B  | Patient029   |
| 20991 | Patient029   | Patient235E  |
| 20991 | Patient069   | Patient103E  |
| 20991 | Patient171   | Patient192A  |
| 20991 | Patient196F  | Patient215   |
| 20991 | Patient202   | Patient238   |
| 20992 | Patient029   | Patient202   |
| 20992 | Patient058   | Patient121B  |
| 20992 | Patient069   | Patient258E  |
| 20992 | Patient215   | Patient222C  |
| 20993 | Patient022B  | Patient179   |
| 20993 | Patient058   | Patient263A  |
| 20993 | Patient126D  | Patient171   |
| 20994 | Patient081A1 | Patient193   |
| 20994 | Patient081B  | Patient089A1 |
| 20994 | Patient089A2 | Patient121A  |
| 20994 | Patient100B  | Patient181A  |
| 20994 | Patient103A  | Patient189C1 |
| 20995 | Patient081E  | Patient089A1 |
| 20995 | Patient088   | Patient121A  |
| 20995 | Patient100B  | Patient181B  |
| 20995 | Patient224B  | Patient238   |
| 20995 | Patient235A  | Patient238   |
| 20996 | Patient022B  | Patient069   |
| 20996 | Patient045A  | Patient114   |
| 20996 | Patient100B  | Patient252B  |
| 20996 | Patient171   | Patient192B  |
| 20996 | Patient173A  | Patient238   |
| 20997 | Patient029   | Patient066D  |
| 20997 | Patient029   | Patient161B  |
| 20997 | Patient045A  | Patient193   |

|       |              |              |
|-------|--------------|--------------|
| 20997 | Patient089A2 | Patient121B  |
| 20997 | Patient100B  | Patient126A  |
| 20998 | Patient029   | Patient066E  |
| 20998 | Patient081F  | Patient089A1 |
| 20998 | Patient088   | Patient121B  |
| 20998 | Patient131   | Patient238   |
| 20998 | Patient220B  | Patient238   |
| 20999 | Patient045B  | Patient114   |
| 20999 | Patient100A  | Patient100B  |
| 20999 | Patient128   | Patient233   |
| 21000 | Patient045B  | Patient193   |
| 21000 | Patient081A2 | Patient089A1 |
| 21000 | Patient100B  | Patient150C  |
| 21000 | Patient171   | Patient192C  |
| 21001 | Patient045C  | Patient114   |
| 21002 | Patient029   | Patient066F  |
| 21002 | Patient032D  | Patient258C1 |
| 21002 | Patient032D  | Patient258C2 |
| 21002 | Patient045C  | Patient193   |
| 21002 | Patient045D  | Patient233   |
| 21002 | Patient075   | Patient198   |
| 21002 | Patient100B  | Patient150A  |
| 21002 | Patient193   | Patient213A  |
| 21003 | Patient028   | Patient258C1 |
| 21003 | Patient028   | Patient258C2 |
| 21003 | Patient081C  | Patient180   |
| 21003 | Patient100B  | Patient196D  |
| 21004 | Patient081A1 | Patient089A1 |
| 21004 | Patient100B  | Patient252F  |
| 21004 | Patient126C  | Patient238   |
| 21004 | Patient171   | Patient192E  |
| 21005 | Patient029   | Patient120A  |
| 21005 | Patient058   | Patient202   |
| 21005 | Patient100B  | Patient252A  |
| 21005 | Patient181A  | Patient238   |
| 21005 | Patient181B  | Patient238   |
| 21007 | Patient092C  | Patient198   |
| 21008 | Patient081C  | Patient179   |
| 21008 | Patient104A  | Patient171   |
| 21008 | Patient104B  | Patient171   |
| 21009 | Patient171   | Patient192F  |
| 21010 | Patient075   | Patient152A  |
| 21010 | Patient075   | Patient152B  |
| 21011 | Patient031   | Patient215   |
| 21011 | Patient086C  | Patient171   |
| 21011 | Patient089A1 | Patient192D  |
| 21012 | Patient058   | Patient081B  |
| 21012 | Patient100B  | Patient173A  |
| 21013 | Patient058   | Patient081E  |
| 21013 | Patient081D  | Patient180   |

|       |              |              |
|-------|--------------|--------------|
| 21013 | Patient081E  | Patient089A2 |
| 21013 | Patient089A1 | Patient145A  |
| 21013 | Patient104B  | Patient179   |
| 21013 | Patient238   | Patient252B  |
| 21014 | Patient029   | Patient103D  |
| 21014 | Patient081B  | Patient089A2 |
| 21014 | Patient103D  | Patient189C2 |
| 21014 | Patient104A  | Patient179   |
| 21014 | Patient192D  | Patient193   |
| 21015 | Patient029   | Patient150C  |
| 21015 | Patient066A  | Patient198   |
| 21015 | Patient081B  | Patient088   |
| 21015 | Patient100B  | Patient150B  |
| 21016 | Patient081E  | Patient088   |
| 21017 | Patient026C  | Patient069   |
| 21017 | Patient029   | Patient103E  |
| 21017 | Patient029   | Patient150A  |
| 21017 | Patient058   | Patient081A2 |
| 21017 | Patient081B  | Patient171   |
| 21017 | Patient103E  | Patient189C2 |
| 21018 | Patient029   | Patient126D  |
| 21018 | Patient029   | Patient252B  |
| 21018 | Patient058   | Patient081F  |
| 21018 | Patient066A  | Patient152A  |
| 21018 | Patient081D  | Patient179   |
| 21018 | Patient081E  | Patient171   |
| 21018 | Patient081F  | Patient089A2 |
| 21018 | Patient171   | Patient247D  |
| 21019 | Patient069   | Patient081C  |
| 21019 | Patient081A2 | Patient089A2 |
| 21019 | Patient089A1 | Patient145C  |
| 21019 | Patient103D  | Patient189C1 |
| 21019 | Patient171   | Patient202   |
| 21020 | Patient021A2 | Patient189C2 |
| 21020 | Patient029   | Patient220B  |
| 21020 | Patient081A2 | Patient088   |
| 21020 | Patient086A  | Patient171   |
| 21021 | Patient021A1 | Patient189C2 |
| 21021 | Patient089A1 | Patient235A  |
| 21021 | Patient238   | Patient252A  |
| 21021 | Patient238   | Patient252F  |
| 21022 | Patient029   | Patient121B  |
| 21022 | Patient058   | Patient081A1 |
| 21022 | Patient081F  | Patient088   |
| 21022 | Patient086E  | Patient171   |
| 21022 | Patient089A1 | Patient120A  |
| 21022 | Patient089A1 | Patient141D  |
| 21022 | Patient103E  | Patient189C1 |
| 21022 | Patient104B  | Patient180   |
| 21023 | Patient021A2 | Patient189C1 |

|       |              |              |
|-------|--------------|--------------|
| 21023 | Patient066A  | Patient152B  |
| 21023 | Patient081A2 | Patient171   |
| 21023 | Patient081F  | Patient171   |
| 21023 | Patient086B  | Patient171   |
| 21023 | Patient104A  | Patient180   |
| 21023 | Patient171   | Patient235F  |
| 21024 | Patient021A1 | Patient189C1 |
| 21024 | Patient081A1 | Patient089A2 |
| 21024 | Patient089A1 | Patient123A  |
| 21025 | Patient029   | Patient252F  |
| 21025 | Patient066A  | Patient215   |
| 21025 | Patient069   | Patient213A  |
| 21025 | Patient081A1 | Patient088   |
| 21025 | Patient100B  | Patient126D  |
| 21025 | Patient171   | Patient235E  |
| 21026 | Patient029   | Patient252A  |
| 21026 | Patient045D  | Patient152A  |
| 21026 | Patient089A1 | Patient092G  |
| 21026 | Patient089A1 | Patient123C  |
| 21027 | Patient029   | Patient126C  |
| 21027 | Patient029   | Patient173B  |
| 21027 | Patient029   | Patient235A  |
| 21027 | Patient081A1 | Patient171   |
| 21028 | Patient029   | Patient224B  |
| 21028 | Patient089A1 | Patient092H  |
| 21028 | Patient089A1 | Patient126C  |
| 21028 | Patient089A1 | Patient261A  |
| 21029 | Patient069   | Patient081D  |
| 21029 | Patient086C  | Patient179   |
| 21029 | Patient089A1 | Patient123B  |
| 21029 | Patient089A1 | Patient123D  |
| 21030 | Patient029   | Patient150B  |
| 21030 | Patient069   | Patient217A  |
| 21030 | Patient171   | Patient247C  |
| 21031 | Patient029   | Patient108B2 |
| 21031 | Patient045D  | Patient152B  |
| 21031 | Patient069   | Patient081B  |
| 21031 | Patient089A2 | Patient192D  |
| 21031 | Patient091A  | Patient215   |
| 21031 | Patient179   | Patient213A  |
| 21031 | Patient194   | Patient215   |
| 21032 | Patient089A1 | Patient202   |
| 21032 | Patient171   | Patient230A  |
| 21033 | Patient026A  | Patient171   |
| 21033 | Patient029   | Patient079A1 |
| 21033 | Patient029   | Patient108B1 |
| 21033 | Patient032A  | Patient089A1 |
| 21033 | Patient058   | Patient145A  |
| 21033 | Patient069   | Patient081E  |
| 21033 | Patient088   | Patient192D  |



|       |              |              |
|-------|--------------|--------------|
| 21033 | Patient089A1 | Patient104A  |
| 21033 | Patient089A1 | Patient104B  |
| 21033 | Patient171   | Patient246A  |
| 21033 | Patient171   | Patient247A  |
| 21033 | Patient171   | Patient247B  |
| 21034 | Patient029   | Patient079B  |
| 21034 | Patient034C  | Patient089A1 |
| 21034 | Patient053C  | Patient089A1 |
| 21034 | Patient069   | Patient217I  |
| 21034 | Patient089A1 | Patient141B  |
| 21034 | Patient100A  | Patient189C2 |
| 21034 | Patient126D  | Patient238   |
| 21035 | Patient032B  | Patient089A1 |
| 21035 | Patient034A  | Patient089A1 |
| 21035 | Patient066A  | Patient258C1 |
| 21035 | Patient066A  | Patient258C2 |
| 21035 | Patient069   | Patient217B  |
| 21035 | Patient069   | Patient217H  |
| 21035 | Patient079A1 | Patient238   |
| 21035 | Patient086C  | Patient180   |
| 21035 | Patient092D  | Patient233   |
| 21035 | Patient108B2 | Patient171   |
| 21036 | Patient026B  | Patient171   |
| 21036 | Patient026F  | Patient171   |
| 21036 | Patient029   | Patient079A2 |
| 21036 | Patient069   | Patient081A2 |
| 21036 | Patient069   | Patient217C  |
| 21036 | Patient069   | Patient217D  |
| 21036 | Patient069   | Patient217F  |
| 21036 | Patient089A1 | Patient141A  |
| 21036 | Patient089A1 | Patient247D  |
| 21036 | Patient089A2 | Patient145A  |
| 21036 | Patient092D  | Patient215   |
| 21036 | Patient141B  | Patient171   |
| 21036 | Patient179   | Patient247D  |
| 21037 | Patient028   | Patient198   |
| 21037 | Patient028   | Patient233   |
| 21037 | Patient029   | Patient079C  |
| 21037 | Patient029   | Patient181B  |
| 21037 | Patient053B  | Patient089A1 |
| 21037 | Patient069   | Patient081F  |
| 21037 | Patient079B  | Patient238   |
| 21037 | Patient089A1 | Patient141C  |
| 21037 | Patient089A1 | Patient261B  |
| 21037 | Patient108B1 | Patient171   |
| 21037 | Patient114   | Patient120A  |
| 21037 | Patient157   | Patient171   |
| 21037 | Patient179   | Patient202   |
| 21038 | Patient021A1 | Patient114   |
| 21038 | Patient021A2 | Patient114   |

|       |              |              |
|-------|--------------|--------------|
| 21038 | Patient026A  | Patient089A1 |
| 21038 | Patient028   | Patient152A  |
| 21038 | Patient029   | Patient181A  |
| 21038 | Patient053A2 | Patient089A1 |
| 21038 | Patient079A2 | Patient238   |
| 21038 | Patient100A  | Patient189C1 |
| 21038 | Patient171   | Patient247E  |
| 21039 | Patient058   | Patient145C  |
| 21039 | Patient058   | Patient192D  |
| 21039 | Patient069   | Patient217E  |
| 21039 | Patient079C  | Patient238   |
| 21039 | Patient086A  | Patient179   |
| 21039 | Patient088   | Patient145A  |
| 21039 | Patient088   | Patient202   |
| 21039 | Patient141A  | Patient171   |
| 21039 | Patient180   | Patient213A  |
| 21040 | Patient034E  | Patient089A1 |
| 21040 | Patient045D  | Patient069   |
| 21040 | Patient141C  | Patient171   |
| 21041 | Patient034B  | Patient089A1 |
| 21041 | Patient069   | Patient081A1 |
| 21041 | Patient086E  | Patient179   |
| 21041 | Patient089A1 | Patient230A  |
| 21041 | Patient089A1 | Patient261D  |
| 21041 | Patient100B  | Patient108B2 |
| 21042 | Patient026B  | Patient089A1 |
| 21042 | Patient034D  | Patient089A1 |
| 21042 | Patient058   | Patient141D  |
| 21042 | Patient058   | Patient235A  |
| 21042 | Patient066D  | Patient089A1 |
| 21042 | Patient086B  | Patient179   |
| 21042 | Patient089A2 | Patient145C  |
| 21042 | Patient089A2 | Patient202   |
| 21042 | Patient089A2 | Patient235A  |
| 21042 | Patient100B  | Patient108B1 |
| 21043 | Patient026F  | Patient089A1 |
| 21043 | Patient028   | Patient152B  |
| 21043 | Patient086C  | Patient089A1 |
| 21043 | Patient179   | Patient241   |
| 21044 | Patient031   | Patient233   |
| 21044 | Patient058   | Patient092G  |
| 21044 | Patient058   | Patient123A  |
| 21044 | Patient069   | Patient217J  |
| 21044 | Patient088   | Patient235A  |
| 21044 | Patient114   | Patient141B  |
| 21044 | Patient171   | Patient230B  |
| 21044 | Patient179   | Patient246A  |
| 21044 | Patient179   | Patient247C  |
| 21044 | Patient233   | Patient263A  |
| 21045 | Patient058   | Patient123C  |

|       |              |              |
|-------|--------------|--------------|
| 21045 | Patient066A  | Patient233   |
| 21045 | Patient066E  | Patient089A1 |
| 21045 | Patient079A1 | Patient100B  |
| 21045 | Patient088   | Patient141D  |
| 21045 | Patient088   | Patient145C  |
| 21045 | Patient089A2 | Patient120A  |
| 21045 | Patient089A2 | Patient141D  |
| 21045 | Patient180   | Patient247D  |
| 21046 | Patient029   | Patient108A  |
| 21046 | Patient075   | Patient215   |
| 21046 | Patient086A  | Patient180   |
| 21046 | Patient089A1 | Patient092E  |
| 21046 | Patient157   | Patient179   |
| 21046 | Patient179   | Patient247A  |
| 21046 | Patient222C  | Patient233   |
| 21047 | Patient058   | Patient092H  |
| 21047 | Patient058   | Patient123B  |
| 21047 | Patient069   | Patient173B  |
| 21047 | Patient086E  | Patient180   |
| 21047 | Patient088   | Patient092G  |
| 21047 | Patient088   | Patient104A  |
| 21047 | Patient088   | Patient104B  |
| 21047 | Patient088   | Patient120A  |
| 21047 | Patient089A2 | Patient104A  |
| 21047 | Patient089A2 | Patient104B  |
| 21047 | Patient089A2 | Patient123A  |
| 21047 | Patient114   | Patient141A  |
| 21047 | Patient179   | Patient247B  |
| 21048 | Patient053A1 | Patient233   |
| 21048 | Patient058   | Patient261A  |
| 21048 | Patient079B  | Patient100B  |
| 21048 | Patient086B  | Patient180   |
| 21048 | Patient103A  | Patient171   |
| 21048 | Patient114   | Patient141C  |
| 21048 | Patient126A  | Patient238   |
| 21048 | Patient171   | Patient192D  |
| 21048 | Patient258C1 | Patient263A  |
| 21048 | Patient258C2 | Patient263A  |
| 21049 | Patient031   | Patient152B  |
| 21049 | Patient058   | Patient120A  |
| 21049 | Patient058   | Patient123D  |
| 21049 | Patient066F  | Patient089A1 |
| 21049 | Patient079A2 | Patient100B  |
| 21049 | Patient088   | Patient092H  |
| 21049 | Patient089A2 | Patient092G  |
| 21049 | Patient089A2 | Patient123C  |
| 21049 | Patient146   | Patient233   |
| 21049 | Patient152A  | Patient263A  |
| 21050 | Patient031   | Patient152A  |
| 21050 | Patient053C  | Patient058   |

|       |              |              |
|-------|--------------|--------------|
| 21050 | Patient079C  | Patient100B  |
| 21050 | Patient088   | Patient123A  |
| 21050 | Patient088   | Patient247D  |
| 21050 | Patient089A2 | Patient247D  |
| 21050 | Patient100B  | Patient108A  |
| 21050 | Patient146   | Patient258C1 |
| 21050 | Patient179   | Patient247E  |
| 21050 | Patient180   | Patient241   |
| 21051 | Patient026D  | Patient114   |
| 21051 | Patient029   | Patient108D  |
| 21051 | Patient053A1 | Patient215   |
| 21051 | Patient058   | Patient104B  |
| 21051 | Patient058   | Patient126C  |
| 21051 | Patient066D  | Patient171   |
| 21051 | Patient088   | Patient123C  |
| 21051 | Patient089A1 | Patient247C  |
| 21051 | Patient089A2 | Patient092H  |
| 21051 | Patient089A2 | Patient126C  |
| 21051 | Patient089A2 | Patient261A  |
| 21051 | Patient146   | Patient258C2 |
| 21051 | Patient222C  | Patient258C1 |
| 21051 | Patient222C  | Patient258C2 |
| 21052 | Patient029   | Patient173A  |
| 21052 | Patient088   | Patient126C  |
| 21052 | Patient088   | Patient261A  |
| 21052 | Patient089A1 | Patient230B  |
| 21052 | Patient089A2 | Patient123B  |
| 21052 | Patient089A2 | Patient123D  |
| 21052 | Patient152A  | Patient222C  |
| 21052 | Patient180   | Patient246A  |
| 21053 | Patient026E  | Patient114   |
| 21053 | Patient066E  | Patient171   |
| 21053 | Patient086A  | Patient089A1 |
| 21053 | Patient088   | Patient123B  |
| 21053 | Patient092C  | Patient208   |
| 21053 | Patient126C  | Patient171   |
| 21053 | Patient141B  | Patient193   |
| 21053 | Patient152A  | Patient196F  |
| 21054 | Patient053B  | Patient058   |
| 21054 | Patient058   | Patient104A  |
| 21054 | Patient089A1 | Patient247A  |
| 21054 | Patient089A1 | Patient247B  |
| 21054 | Patient120C  | Patient238   |
| 21054 | Patient152B  | Patient263A  |
| 21054 | Patient157   | Patient180   |
| 21054 | Patient180   | Patient247C  |
| 21054 | Patient215   | Patient251   |
| 21055 | Patient029   | Patient109A  |
| 21055 | Patient045A  | Patient069   |
| 21055 | Patient053A2 | Patient058   |

|       |              |              |
|-------|--------------|--------------|
| 21055 | Patient053C  | Patient089A2 |
| 21055 | Patient086E  | Patient089A1 |
| 21055 | Patient088   | Patient123D  |
| 21055 | Patient089A1 | Patient092A  |
| 21055 | Patient100B  | Patient108D  |
| 21055 | Patient108B2 | Patient238   |
| 21055 | Patient196F  | Patient233   |
| 21056 | Patient032A  | Patient089A2 |
| 21056 | Patient032B  | Patient058   |
| 21056 | Patient034C  | Patient058   |
| 21056 | Patient053C  | Patient088   |
| 21056 | Patient058   | Patient141B  |
| 21056 | Patient086B  | Patient089A1 |
| 21056 | Patient100B  | Patient103B  |
| 21056 | Patient100B  | Patient103C  |
| 21056 | Patient120D  | Patient238   |
| 21056 | Patient180   | Patient247A  |
| 21057 | Patient032A  | Patient058   |
| 21057 | Patient032B  | Patient089A2 |
| 21057 | Patient034A  | Patient058   |
| 21057 | Patient034C  | Patient089A2 |
| 21057 | Patient045A  | Patient180   |
| 21057 | Patient058   | Patient261B  |
| 21057 | Patient066F  | Patient171   |
| 21057 | Patient089A1 | Patient192A  |
| 21057 | Patient089A2 | Patient141B  |
| 21057 | Patient108B1 | Patient238   |
| 21057 | Patient114   | Patient230A  |
| 21057 | Patient141A  | Patient193   |
| 21057 | Patient141C  | Patient193   |
| 21057 | Patient146   | Patient208   |
| 21057 | Patient152B  | Patient222C  |
| 21057 | Patient180   | Patient247B  |
| 21057 | Patient198   | Patient263A  |
| 21058 | Patient029   | Patient108G  |
| 21058 | Patient029   | Patient109B  |
| 21058 | Patient034A  | Patient089A2 |
| 21058 | Patient045A  | Patient179   |
| 21058 | Patient045B  | Patient069   |
| 21058 | Patient053B  | Patient089A2 |
| 21058 | Patient058   | Patient247D  |
| 21058 | Patient089A1 | Patient246A  |
| 21058 | Patient120B  | Patient238   |
| 21058 | Patient152B  | Patient196F  |
| 21059 | Patient032A  | Patient088   |
| 21059 | Patient053A2 | Patient089A2 |
| 21059 | Patient053B  | Patient088   |
| 21059 | Patient058   | Patient141A  |
| 21059 | Patient089A2 | Patient141A  |
| 21059 | Patient100B  | Patient109A  |

|       |              |              |
|-------|--------------|--------------|
| 21059 | Patient120A  | Patient171   |
| 21059 | Patient180   | Patient202   |
| 21060 | Patient007A  | Patient069   |
| 21060 | Patient026A  | Patient058   |
| 21060 | Patient026D  | Patient193   |
| 21060 | Patient032B  | Patient088   |
| 21060 | Patient034C  | Patient088   |
| 21060 | Patient045B  | Patient180   |
| 21060 | Patient045C  | Patient069   |
| 21060 | Patient053A2 | Patient088   |
| 21060 | Patient058   | Patient141C  |
| 21060 | Patient069   | Patient161B  |
| 21060 | Patient088   | Patient141B  |
| 21060 | Patient089A1 | Patient092B  |
| 21060 | Patient089A1 | Patient192C  |
| 21060 | Patient089A1 | Patient247E  |
| 21060 | Patient089A2 | Patient141C  |
| 21060 | Patient089A2 | Patient261B  |
| 21060 | Patient171   | Patient230F  |
| 21060 | Patient180   | Patient247E  |
| 21060 | Patient196F  | Patient258C1 |
| 21060 | Patient196F  | Patient258C2 |
| 21060 | Patient198   | Patient222C  |
| 21061 | Patient026A  | Patient089A2 |
| 21061 | Patient029   | Patient109D  |
| 21061 | Patient034A  | Patient088   |
| 21061 | Patient045B  | Patient179   |
| 21061 | Patient058   | Patient086C  |
| 21061 | Patient058   | Patient230A  |
| 21061 | Patient058   | Patient261D  |
| 21061 | Patient088   | Patient261B  |
| 21061 | Patient089A1 | Patient192B  |
| 21061 | Patient171   | Patient230E  |
| 21061 | Patient196F  | Patient198   |
| 21062 | Patient026A  | Patient088   |
| 21062 | Patient026E  | Patient193   |
| 21062 | Patient029   | Patient109E  |
| 21062 | Patient034E  | Patient058   |
| 21062 | Patient045C  | Patient180   |
| 21062 | Patient088   | Patient141A  |
| 21062 | Patient089A1 | Patient230F  |
| 21062 | Patient100B  | Patient108G  |
| 21062 | Patient100B  | Patient224A  |
| 21062 | Patient114   | Patient235A  |
| 21063 | Patient029   | Patient108F  |
| 21063 | Patient029   | Patient108H  |
| 21063 | Patient034B  | Patient058   |
| 21063 | Patient034E  | Patient089A2 |
| 21063 | Patient045C  | Patient179   |
| 21063 | Patient058   | Patient066D  |

|       |              |              |
|-------|--------------|--------------|
| 21063 | Patient088   | Patient141C  |
| 21063 | Patient089A1 | Patient157   |
| 21063 | Patient089A2 | Patient230A  |
| 21063 | Patient092D  | Patient258C1 |
| 21063 | Patient092D  | Patient258C2 |
| 21063 | Patient100B  | Patient109B  |
| 21064 | Patient007B  | Patient069   |
| 21064 | Patient026B  | Patient058   |
| 21064 | Patient029   | Patient109C  |
| 21064 | Patient034B  | Patient089A2 |
| 21064 | Patient034D  | Patient058   |
| 21064 | Patient088   | Patient230A  |
| 21064 | Patient089A2 | Patient261D  |
| 21065 | Patient026B  | Patient089A2 |
| 21065 | Patient026F  | Patient058   |
| 21065 | Patient034D  | Patient089A2 |
| 21065 | Patient053C  | Patient180   |
| 21065 | Patient058   | Patient066E  |
| 21065 | Patient066D  | Patient089A2 |
| 21065 | Patient088   | Patient247C  |
| 21065 | Patient088   | Patient261D  |
| 21065 | Patient114   | Patient242   |
| 21065 | Patient251   | Patient258C1 |
| 21065 | Patient251   | Patient258C2 |
| 21066 | Patient026B  | Patient088   |
| 21066 | Patient026F  | Patient089A2 |
| 21066 | Patient034E  | Patient088   |
| 21066 | Patient053B  | Patient180   |
| 21066 | Patient053C  | Patient179   |
| 21066 | Patient066D  | Patient088   |
| 21066 | Patient089A1 | Patient230E  |
| 21066 | Patient089A2 | Patient247C  |
| 21066 | Patient114   | Patient161B  |
| 21067 | Patient013   | Patient208   |
| 21067 | Patient026F  | Patient088   |
| 21067 | Patient034B  | Patient088   |
| 21067 | Patient053A2 | Patient180   |
| 21067 | Patient100B  | Patient108H  |
| 21067 | Patient114   | Patient230B  |
| 21067 | Patient210   | Patient215   |
| 21068 | Patient007A  | Patient180   |
| 21068 | Patient023   | Patient171   |
| 21068 | Patient034D  | Patient088   |
| 21068 | Patient066E  | Patient089A2 |
| 21068 | Patient086C  | Patient089A2 |
| 21068 | Patient088   | Patient247A  |
| 21068 | Patient088   | Patient247B  |
| 21068 | Patient089A1 | Patient173B  |
| 21068 | Patient089A2 | Patient247A  |
| 21068 | Patient089A2 | Patient247B  |

|       |              |              |
|-------|--------------|--------------|
| 21068 | Patient193   | Patient230A  |
| 21068 | Patient194   | Patient258C2 |
| 21069 | Patient029   | Patient126A  |
| 21069 | Patient053B  | Patient179   |
| 21069 | Patient058   | Patient066F  |
| 21069 | Patient058   | Patient092E  |
| 21069 | Patient066E  | Patient088   |
| 21069 | Patient075   | Patient208   |
| 21069 | Patient086C  | Patient088   |
| 21069 | Patient088   | Patient157   |
| 21069 | Patient089A1 | Patient192E  |
| 21069 | Patient089A2 | Patient092E  |
| 21069 | Patient100B  | Patient108F  |
| 21069 | Patient100B  | Patient109D  |
| 21069 | Patient194   | Patient258C1 |
| 21070 | Patient053A2 | Patient179   |
| 21070 | Patient100B  | Patient109E  |
| 21070 | Patient114   | Patient252B  |
| 21070 | Patient179   | Patient189B  |
| 21071 | Patient058   | Patient086A  |
| 21071 | Patient089A1 | Patient126A  |
| 21071 | Patient161B  | Patient193   |
| 21072 | Patient007B  | Patient180   |
| 21072 | Patient066D  | Patient114   |
| 21072 | Patient066F  | Patient089A2 |
| 21072 | Patient088   | Patient092E  |
| 21072 | Patient088   | Patient246A  |
| 21072 | Patient089A2 | Patient246A  |
| 21072 | Patient099E  | Patient171   |
| 21072 | Patient114   | Patient241   |
| 21072 | Patient171   | Patient213B  |
| 21072 | Patient180   | Patient235F  |
| 21072 | Patient189C2 | Patient252B  |
| 21073 | Patient058   | Patient086E  |
| 21073 | Patient058   | Patient230B  |
| 21073 | Patient066F  | Patient088   |
| 21073 | Patient069   | Patient150A  |
| 21073 | Patient088   | Patient247E  |
| 21073 | Patient089A1 | Patient192F  |
| 21073 | Patient100B  | Patient109C  |
| 21073 | Patient100B  | Patient213A  |
| 21073 | Patient108A  | Patient238   |
| 21073 | Patient179   | Patient189A  |
| 21073 | Patient193   | Patient235A  |
| 21074 | Patient021A2 | Patient193   |
| 21074 | Patient023   | Patient029   |
| 21074 | Patient026A  | Patient114   |
| 21074 | Patient045D  | Patient171   |
| 21074 | Patient058   | Patient086B  |
| 21074 | Patient069   | Patient150C  |



|       |              |              |
|-------|--------------|--------------|
| 21074 | Patient089A2 | Patient247E  |
| 21074 | Patient126C  | Patient193   |
| 21074 | Patient159   | Patient171   |
| 21074 | Patient179   | Patient189E  |
| 21074 | Patient179   | Patient235F  |
| 21074 | Patient233   | Patient251   |
| 21075 | Patient021A1 | Patient193   |
| 21075 | Patient023   | Patient114   |
| 21075 | Patient054   | Patient215   |
| 21075 | Patient058   | Patient247C  |
| 21075 | Patient066E  | Patient114   |
| 21075 | Patient069   | Patient235A  |
| 21075 | Patient089A2 | Patient230B  |
| 21075 | Patient114   | Patient126C  |
| 21075 | Patient179   | Patient242   |
| 21075 | Patient180   | Patient235E  |
| 21075 | Patient189C1 | Patient252B  |
| 21075 | Patient193   | Patient241   |
| 21075 | Patient210   | Patient258C1 |
| 21075 | Patient210   | Patient258C2 |
| 21076 | Patient029   | Patient097C  |
| 21076 | Patient029   | Patient097D  |
| 21076 | Patient058   | Patient092A  |
| 21076 | Patient058   | Patient192A  |
| 21076 | Patient066D  | Patient193   |
| 21076 | Patient088   | Patient092A  |
| 21076 | Patient088   | Patient230B  |
| 21076 | Patient114   | Patient150C  |
| 21077 | Patient029   | Patient097A  |
| 21077 | Patient058   | Patient247B  |
| 21077 | Patient086A  | Patient089A2 |
| 21077 | Patient089A2 | Patient157   |
| 21077 | Patient108D  | Patient238   |
| 21077 | Patient114   | Patient230F  |
| 21077 | Patient179   | Patient235E  |
| 21077 | Patient193   | Patient230B  |
| 21078 | Patient023   | Patient100B  |
| 21078 | Patient026B  | Patient114   |
| 21078 | Patient058   | Patient247A  |
| 21078 | Patient069   | Patient164   |
| 21078 | Patient089A2 | Patient092A  |
| 21078 | Patient089A2 | Patient192A  |
| 21078 | Patient097C  | Patient238   |
| 21078 | Patient097D  | Patient238   |
| 21078 | Patient099E  | Patient179   |
| 21078 | Patient114   | Patient150A  |
| 21078 | Patient189C2 | Patient252A  |
| 21078 | Patient189C2 | Patient252F  |
| 21078 | Patient224A  | Patient238   |
| 21079 | Patient026D  | Patient069   |

|       |              |              |
|-------|--------------|--------------|
| 21079 | Patient066F  | Patient114   |
| 21079 | Patient086E  | Patient089A2 |
| 21079 | Patient097A  | Patient238   |
| 21079 | Patient100A  | Patient114   |
| 21079 | Patient114   | Patient252A  |
| 21079 | Patient180   | Patient189B  |
| 21080 | Patient026F  | Patient114   |
| 21080 | Patient058   | Patient246A  |
| 21080 | Patient066E  | Patient193   |
| 21080 | Patient086B  | Patient089A2 |
| 21080 | Patient091A  | Patient233   |
| 21080 | Patient103D  | Patient171   |
| 21080 | Patient109A  | Patient238   |
| 21080 | Patient114   | Patient230E  |
| 21080 | Patient114   | Patient252F  |
| 21081 | Patient026A  | Patient193   |
| 21081 | Patient026E  | Patient069   |
| 21081 | Patient053A1 | Patient258C1 |
| 21081 | Patient053A1 | Patient258C2 |
| 21081 | Patient058   | Patient092B  |
| 21081 | Patient075   | Patient258C1 |
| 21081 | Patient075   | Patient258C2 |
| 21081 | Patient086A  | Patient088   |
| 21081 | Patient088   | Patient192A  |
| 21081 | Patient091A  | Patient198   |
| 21081 | Patient121A  | Patient171   |
| 21081 | Patient150C  | Patient193   |
| 21081 | Patient180   | Patient189A  |
| 21081 | Patient189C1 | Patient252A  |
| 21081 | Patient189C1 | Patient252F  |
| 21081 | Patient210   | Patient233   |
| 21082 | Patient029   | Patient097B  |
| 21082 | Patient092G  | Patient179   |
| 21082 | Patient092G  | Patient180   |
| 21082 | Patient092H  | Patient180   |
| 21082 | Patient103C  | Patient238   |
| 21082 | Patient150A  | Patient193   |
| 21082 | Patient171   | Patient201B  |
| 21082 | Patient179   | Patient213B  |
| 21082 | Patient180   | Patient189E  |
| 21082 | Patient180   | Patient242   |
| 21083 | Patient058   | Patient192B  |
| 21083 | Patient058   | Patient192C  |
| 21083 | Patient058   | Patient247E  |
| 21083 | Patient066F  | Patient193   |
| 21083 | Patient075   | Patient233   |
| 21083 | Patient086E  | Patient088   |
| 21083 | Patient088   | Patient092B  |
| 21083 | Patient089A2 | Patient092B  |
| 21083 | Patient089A2 | Patient192C  |

|       |              |              |
|-------|--------------|--------------|
| 21083 | Patient103B  | Patient238   |
| 21083 | Patient103E  | Patient171   |
| 21083 | Patient108G  | Patient238   |
| 21083 | Patient159   | Patient179   |
| 21084 | Patient031   | Patient258C1 |
| 21084 | Patient074D  | Patient100B  |
| 21084 | Patient086B  | Patient088   |
| 21084 | Patient089A2 | Patient192B  |
| 21084 | Patient092H  | Patient179   |
| 21084 | Patient109B  | Patient238   |
| 21084 | Patient171   | Patient222A  |
| 21084 | Patient235C  | Patient238   |
| 21085 | Patient026B  | Patient193   |
| 21085 | Patient031   | Patient258C2 |
| 21085 | Patient045D  | Patient179   |
| 21085 | Patient058   | Patient157   |
| 21085 | Patient058   | Patient230F  |
| 21085 | Patient088   | Patient192B  |
| 21085 | Patient089A2 | Patient230F  |
| 21085 | Patient097B  | Patient238   |
| 21085 | Patient121B  | Patient171   |
| 21085 | Patient171   | Patient222B  |
| 21086 | Patient023   | Patient238   |
| 21086 | Patient026D  | Patient179   |
| 21086 | Patient069   | Patient141A  |
| 21086 | Patient088   | Patient192C  |
| 21086 | Patient097D  | Patient100B  |
| 21087 | Patient026F  | Patient193   |
| 21087 | Patient045D  | Patient215   |
| 21087 | Patient066A  | Patient208   |
| 21087 | Patient069   | Patient141B  |
| 21087 | Patient091A  | Patient152A  |
| 21087 | Patient093A  | Patient198   |
| 21087 | Patient097C  | Patient100B  |
| 21087 | Patient097E  | Patient238   |
| 21087 | Patient099E  | Patient180   |
| 21087 | Patient127A  | Patient171   |
| 21087 | Patient235B  | Patient238   |
| 21088 | Patient026E  | Patient179   |
| 21088 | Patient029   | Patient097E  |
| 21088 | Patient058   | Patient230E  |
| 21088 | Patient088   | Patient230F  |
| 21088 | Patient089A1 | Patient235F  |
| 21088 | Patient089A2 | Patient230E  |
| 21088 | Patient091A  | Patient152B  |
| 21088 | Patient093D  | Patient198   |
| 21088 | Patient097A  | Patient100B  |
| 21088 | Patient108F  | Patient238   |
| 21088 | Patient108H  | Patient238   |
| 21088 | Patient109D  | Patient238   |

|       |              |              |
|-------|--------------|--------------|
| 21089 | Patient058   | Patient173B  |
| 21089 | Patient069   | Patient141C  |
| 21089 | Patient069   | Patient150B  |
| 21089 | Patient074B  | Patient100B  |
| 21089 | Patient086E  | Patient233   |
| 21089 | Patient108A  | Patient189C2 |
| 21089 | Patient109E  | Patient238   |
| 21089 | Patient171   | Patient252D  |
| 21089 | Patient193   | Patient230F  |
| 21090 | Patient086C  | Patient233   |
| 21090 | Patient089A1 | Patient235E  |
| 21090 | Patient114   | Patient131   |
| 21090 | Patient180   | Patient213B  |
| 21090 | Patient180   | Patient261A  |
| 21090 | Patient233   | Patient258F  |
| 21091 | Patient058   | Patient192E  |
| 21091 | Patient088   | Patient230E  |
| 21091 | Patient091A  | Patient258C2 |
| 21091 | Patient109C  | Patient238   |
| 21091 | Patient114   | Patient150B  |
| 21091 | Patient159   | Patient180   |
| 21091 | Patient171   | Patient236B  |
| 21092 | Patient069   | Patient230A  |
| 21092 | Patient074A  | Patient100B  |
| 21092 | Patient074C  | Patient100B  |
| 21092 | Patient089A2 | Patient173B  |
| 21092 | Patient089A2 | Patient192E  |
| 21092 | Patient091A  | Patient258C1 |
| 21092 | Patient108A  | Patient189C1 |
| 21092 | Patient120A  | Patient193   |
| 21092 | Patient127B  | Patient171   |
| 21092 | Patient152B  | Patient241   |
| 21092 | Patient171   | Patient196A  |
| 21092 | Patient179   | Patient222A  |
| 21092 | Patient179   | Patient222B  |
| 21092 | Patient193   | Patient230E  |
| 21092 | Patient195   | Patient238   |
| 21093 | Patient026D  | Patient180   |
| 21093 | Patient088   | Patient192E  |
| 21093 | Patient097B  | Patient100B  |
| 21093 | Patient100B  | Patient120C  |
| 21093 | Patient100B  | Patient120D  |
| 21093 | Patient108D  | Patient189C2 |
| 21093 | Patient179   | Patient201B  |
| 21093 | Patient233   | Patient258B  |
| 21094 | Patient086A  | Patient233   |
| 21094 | Patient088   | Patient173B  |
| 21094 | Patient089A2 | Patient126A  |
| 21094 | Patient093A  | Patient152A  |
| 21094 | Patient171   | Patient218A  |

|       |              |              |
|-------|--------------|--------------|
| 21094 | Patient233   | Patient258A1 |
| 21094 | Patient233   | Patient258A2 |
| 21094 | Patient233   | Patient258G  |
| 21095 | Patient026E  | Patient180   |
| 21095 | Patient058   | Patient126A  |
| 21095 | Patient058   | Patient192F  |
| 21095 | Patient088   | Patient126A  |
| 21095 | Patient093D  | Patient152A  |
| 21095 | Patient094A  | Patient198   |
| 21095 | Patient100B  | Patient120B  |
| 21095 | Patient152A  | Patient241   |
| 21095 | Patient189C2 | Patient258E  |
| 21096 | Patient031   | Patient198   |
| 21096 | Patient089A2 | Patient192F  |
| 21096 | Patient093E  | Patient198   |
| 21096 | Patient094B  | Patient198   |
| 21096 | Patient097E  | Patient100B  |
| 21096 | Patient108D  | Patient189C1 |
| 21096 | Patient114   | Patient230D  |
| 21096 | Patient150B  | Patient193   |
| 21096 | Patient171   | Patient181A  |
| 21096 | Patient171   | Patient181B  |
| 21096 | Patient171   | Patient201E  |
| 21096 | Patient171   | Patient246C  |
| 21096 | Patient180   | Patient192A  |
| 21096 | Patient233   | Patient258D  |
| 21097 | Patient086B  | Patient233   |
| 21097 | Patient089A1 | Patient224B  |
| 21097 | Patient109A  | Patient189C2 |
| 21097 | Patient171   | Patient187   |
| 21097 | Patient179   | Patient192A  |
| 21097 | Patient179   | Patient261A  |
| 21098 | Patient038   | Patient198   |
| 21098 | Patient074E  | Patient100B  |
| 21098 | Patient094C  | Patient198   |
| 21098 | Patient099A  | Patient171   |
| 21098 | Patient099B  | Patient171   |
| 21098 | Patient171   | Patient189B  |
| 21098 | Patient171   | Patient201A  |
| 21098 | Patient171   | Patient235A  |
| 21098 | Patient179   | Patient236B  |
| 21098 | Patient189C1 | Patient258E  |
| 21098 | Patient208   | Patient241   |
| 21099 | Patient088   | Patient192F  |
| 21099 | Patient089A1 | Patient213B  |
| 21099 | Patient093A  | Patient152B  |
| 21099 | Patient108A  | Patient114   |
| 21099 | Patient108G  | Patient189C2 |
| 21099 | Patient126A  | Patient171   |
| 21099 | Patient127A  | Patient179   |

|       |              |              |
|-------|--------------|--------------|
| 21099 | Patient171   | Patient189A  |
| 21099 | Patient171   | Patient196C  |
| 21099 | Patient171   | Patient196E  |
| 21099 | Patient171   | Patient222D  |
| 21099 | Patient179   | Patient252D  |
| 21099 | Patient180   | Patient261B  |
| 21100 | Patient089A1 | Patient100A  |
| 21100 | Patient093D  | Patient152B  |
| 21100 | Patient109A  | Patient189C1 |
| 21100 | Patient171   | Patient222F  |
| 21100 | Patient171   | Patient246E  |
| 21100 | Patient180   | Patient222A  |
| 21100 | Patient180   | Patient222B  |
| 21101 | Patient171   | Patient189E  |
| 21101 | Patient171   | Patient222E  |
| 21101 | Patient171   | Patient246B  |
| 21101 | Patient180   | Patient192B  |
| 21101 | Patient180   | Patient201B  |
| 21102 | Patient031   | Patient208   |
| 21102 | Patient094A  | Patient152A  |
| 21102 | Patient099C  | Patient171   |
| 21102 | Patient100B  | Patient195   |
| 21102 | Patient100B  | Patient235C  |
| 21102 | Patient108G  | Patient189C1 |
| 21102 | Patient109B  | Patient189C2 |
| 21102 | Patient171   | Patient184   |
| 21102 | Patient171   | Patient218B  |
| 21102 | Patient171   | Patient236A  |
| 21102 | Patient179   | Patient192B  |
| 21103 | Patient045D  | Patient180   |
| 21103 | Patient089A1 | Patient103A  |
| 21103 | Patient093E  | Patient152A  |
| 21103 | Patient094B  | Patient152A  |
| 21103 | Patient108D  | Patient114   |
| 21103 | Patient114   | Patient181B  |
| 21103 | Patient127B  | Patient179   |
| 21103 | Patient171   | Patient196B  |
| 21103 | Patient171   | Patient224B  |
| 21103 | Patient171   | Patient246D  |
| 21103 | Patient179   | Patient196A  |
| 21103 | Patient179   | Patient218A  |
| 21104 | Patient092E  | Patient180   |
| 21104 | Patient099D  | Patient171   |
| 21104 | Patient108B2 | Patient114   |
| 21104 | Patient108H  | Patient189C2 |
| 21104 | Patient180   | Patient261D  |
| 21105 | Patient029   | Patient213A  |
| 21105 | Patient079A1 | Patient189C2 |
| 21105 | Patient094C  | Patient152A  |
| 21105 | Patient109B  | Patient189C1 |

|       |              |              |
|-------|--------------|--------------|
| 21105 | Patient171   | Patient220A  |
| 21105 | Patient193   | Patient242   |
| 21105 | Patient193   | Patient252B  |
| 21106 | Patient069   | Patient173A  |
| 21106 | Patient089A1 | Patient099E  |
| 21106 | Patient089A1 | Patient181B  |
| 21106 | Patient092D  | Patient152B  |
| 21106 | Patient092E  | Patient179   |
| 21106 | Patient099A  | Patient179   |
| 21106 | Patient099B  | Patient179   |
| 21106 | Patient100B  | Patient235B  |
| 21106 | Patient108F  | Patient189C2 |
| 21106 | Patient179   | Patient192C  |
| 21106 | Patient179   | Patient261B  |
| 21106 | Patient207   | Patient233   |
| 21107 | Patient029   | Patient120C  |
| 21107 | Patient029   | Patient120D  |
| 21107 | Patient038   | Patient152A  |
| 21107 | Patient058   | Patient235F  |
| 21107 | Patient069   | Patient100A  |
| 21107 | Patient069   | Patient230B  |
| 21107 | Patient079A2 | Patient189C2 |
| 21107 | Patient088   | Patient159   |
| 21107 | Patient094A  | Patient152B  |
| 21107 | Patient108H  | Patient189C1 |
| 21107 | Patient109A  | Patient114   |
| 21107 | Patient109D  | Patient189C2 |
| 21107 | Patient114   | Patient181A  |
| 21107 | Patient179   | Patient184   |
| 21107 | Patient179   | Patient187   |
| 21107 | Patient179   | Patient246C  |
| 21107 | Patient180   | Patient252D  |
| 21108 | Patient023   | Patient193   |
| 21108 | Patient038   | Patient215   |
| 21108 | Patient054   | Patient258C1 |
| 21108 | Patient054   | Patient258C2 |
| 21108 | Patient079A1 | Patient189C1 |
| 21108 | Patient089A1 | Patient159   |
| 21108 | Patient089A1 | Patient181A  |
| 21108 | Patient092D  | Patient152A  |
| 21108 | Patient093E  | Patient152B  |
| 21108 | Patient094B  | Patient152B  |
| 21108 | Patient108B1 | Patient114   |
| 21108 | Patient109E  | Patient189C2 |
| 21108 | Patient179   | Patient201E  |
| 21108 | Patient179   | Patient222D  |
| 21108 | Patient180   | Patient192C  |
| 21108 | Patient180   | Patient236B  |
| 21108 | Patient193   | Patient230D  |
| 21108 | Patient198   | Patient210   |

|       |              |              |
|-------|--------------|--------------|
| 21108 | Patient207   | Patient215   |
| 21109 | Patient058   | Patient235E  |
| 21109 | Patient089A1 | Patient201B  |
| 21109 | Patient089A1 | Patient222A  |
| 21109 | Patient089A2 | Patient235F  |
| 21109 | Patient108F  | Patient189C1 |
| 21109 | Patient108G  | Patient114   |
| 21109 | Patient109B  | Patient114   |
| 21109 | Patient127A  | Patient180   |
| 21109 | Patient171   | Patient263B  |
| 21109 | Patient179   | Patient196C  |
| 21109 | Patient179   | Patient196E  |
| 21109 | Patient179   | Patient201A  |
| 21109 | Patient179   | Patient222E  |
| 21109 | Patient179   | Patient222F  |
| 21109 | Patient179   | Patient246E  |
| 21109 | Patient180   | Patient192E  |
| 21109 | Patient189C2 | Patient192D  |
| 21110 | Patient029   | Patient120B  |
| 21110 | Patient053A1 | Patient152B  |
| 21110 | Patient079A2 | Patient189C1 |
| 21110 | Patient079B  | Patient189C2 |
| 21110 | Patient079C  | Patient189C2 |
| 21110 | Patient088   | Patient235F  |
| 21110 | Patient094C  | Patient152B  |
| 21110 | Patient099C  | Patient179   |
| 21110 | Patient109C  | Patient189C2 |
| 21110 | Patient109D  | Patient189C1 |
| 21110 | Patient145A  | Patient180   |
| 21110 | Patient152A  | Patient210   |
| 21110 | Patient179   | Patient192E  |
| 21110 | Patient179   | Patient236A  |
| 21111 | Patient069   | Patient126C  |
| 21111 | Patient074D  | Patient238   |
| 21111 | Patient086C  | Patient215   |
| 21111 | Patient086E  | Patient215   |
| 21111 | Patient089A1 | Patient222B  |
| 21111 | Patient089A1 | Patient252B  |
| 21111 | Patient089A2 | Patient235E  |
| 21111 | Patient092A  | Patient180   |
| 21111 | Patient109E  | Patient189C1 |
| 21111 | Patient179   | Patient246B  |
| 21111 | Patient179   | Patient261D  |
| 21111 | Patient180   | Patient196A  |
| 21111 | Patient180   | Patient218A  |
| 21111 | Patient198   | Patient241   |
| 21111 | Patient207   | Patient258C1 |
| 21111 | Patient207   | Patient258C2 |
| 21112 | Patient038   | Patient152B  |
| 21112 | Patient038   | Patient258C1 |



|       |              |              |
|-------|--------------|--------------|
| 21112 | Patient038   | Patient258C2 |
| 21112 | Patient053A1 | Patient152A  |
| 21112 | Patient079B  | Patient189C1 |
| 21112 | Patient088   | Patient235E  |
| 21112 | Patient089A2 | Patient159   |
| 21112 | Patient093C  | Patient215   |
| 21112 | Patient114   | Patient173B  |
| 21112 | Patient171   | Patient265   |
| 21112 | Patient179   | Patient218B  |
| 21112 | Patient179   | Patient220A  |
| 21113 | Patient054   | Patient152A  |
| 21113 | Patient079C  | Patient189C1 |
| 21113 | Patient088   | Patient213B  |
| 21113 | Patient089A2 | Patient213B  |
| 21113 | Patient092A  | Patient179   |
| 21113 | Patient099D  | Patient179   |
| 21113 | Patient127B  | Patient180   |
| 21113 | Patient149B  | Patient171   |
| 21113 | Patient152B  | Patient251   |
| 21113 | Patient179   | Patient196B  |
| 21113 | Patient179   | Patient246D  |
| 21113 | Patient193   | Patient252F  |
| 21113 | Patient233   | Patient258E  |
| 21114 | Patient069   | Patient230F  |
| 21114 | Patient088   | Patient100A  |
| 21114 | Patient089A2 | Patient100A  |
| 21114 | Patient099A  | Patient180   |
| 21114 | Patient099B  | Patient180   |
| 21114 | Patient108H  | Patient114   |
| 21114 | Patient109C  | Patient189C1 |
| 21114 | Patient109D  | Patient114   |
| 21114 | Patient189C1 | Patient192D  |
| 21114 | Patient193   | Patient252A  |
| 21114 | Patient198   | Patient251   |
| 21115 | Patient038   | Patient233   |
| 21115 | Patient054   | Patient198   |
| 21115 | Patient086A  | Patient215   |
| 21115 | Patient089A1 | Patient196A  |
| 21115 | Patient109C  | Patient114   |
| 21115 | Patient109E  | Patient114   |
| 21115 | Patient152A  | Patient251   |
| 21115 | Patient152B  | Patient207   |
| 21115 | Patient152B  | Patient210   |
| 21115 | Patient179   | Patient192F  |
| 21115 | Patient180   | Patient184   |
| 21115 | Patient180   | Patient187   |
| 21115 | Patient180   | Patient192F  |
| 21115 | Patient180   | Patient222F  |
| 21115 | Patient180   | Patient246C  |
| 21116 | Patient089A1 | Patient236B  |

|       |              |              |
|-------|--------------|--------------|
| 21116 | Patient089A1 | Patient252D  |
| 21116 | Patient092B  | Patient180   |
| 21116 | Patient100A  | Patient171   |
| 21116 | Patient108F  | Patient114   |
| 21116 | Patient120A  | Patient189C2 |
| 21116 | Patient145A  | Patient179   |
| 21116 | Patient145C  | Patient180   |
| 21116 | Patient152A  | Patient207   |
| 21116 | Patient180   | Patient201E  |
| 21116 | Patient180   | Patient222D  |
| 21116 | Patient181B  | Patient193   |
| 21117 | Patient029   | Patient224A  |
| 21117 | Patient069   | Patient230E  |
| 21117 | Patient089A1 | Patient127A  |
| 21117 | Patient120A  | Patient189C1 |
| 21117 | Patient141D  | Patient180   |
| 21117 | Patient180   | Patient196C  |
| 21117 | Patient180   | Patient196E  |
| 21117 | Patient180   | Patient201A  |
| 21117 | Patient180   | Patient222E  |
| 21117 | Patient180   | Patient246E  |
| 21118 | Patient029   | Patient103C  |
| 21118 | Patient054   | Patient152B  |
| 21118 | Patient058   | Patient224B  |
| 21118 | Patient074B  | Patient238   |
| 21118 | Patient092B  | Patient179   |
| 21118 | Patient093D  | Patient215   |
| 21118 | Patient099C  | Patient180   |
| 21118 | Patient100A  | Patient193   |
| 21118 | Patient114   | Patient126A  |
| 21118 | Patient126A  | Patient193   |
| 21118 | Patient179   | Patient263B  |
| 21118 | Patient181A  | Patient193   |
| 21118 | Patient208   | Patient242   |
| 21119 | Patient029   | Patient103B  |
| 21119 | Patient074A  | Patient238   |
| 21119 | Patient074C  | Patient238   |
| 21119 | Patient089A2 | Patient099E  |
| 21119 | Patient093A  | Patient215   |
| 21119 | Patient114   | Patient224B  |
| 21119 | Patient180   | Patient236A  |
| 21119 | Patient180   | Patient246B  |
| 21120 | Patient034C  | Patient180   |
| 21120 | Patient058   | Patient100A  |
| 21120 | Patient069   | Patient131   |
| 21120 | Patient081B  | Patient189C2 |
| 21120 | Patient086B  | Patient215   |
| 21120 | Patient088   | Patient099E  |
| 21120 | Patient089A1 | Patient120C  |
| 21120 | Patient089A1 | Patient127B  |

|       |              |              |
|-------|--------------|--------------|
| 21120 | Patient089A1 | Patient252A  |
| 21120 | Patient089A1 | Patient252F  |
| 21120 | Patient089A2 | Patient224B  |
| 21120 | Patient149B  | Patient179   |
| 21120 | Patient173B  | Patient193   |
| 21120 | Patient180   | Patient218B  |
| 21120 | Patient180   | Patient220A  |
| 21121 | Patient021A2 | Patient069   |
| 21121 | Patient058   | Patient213B  |
| 21121 | Patient069   | Patient230D  |
| 21121 | Patient088   | Patient224B  |
| 21121 | Patient089A1 | Patient120D  |
| 21121 | Patient089A1 | Patient218A  |
| 21121 | Patient099D  | Patient180   |
| 21121 | Patient123A  | Patient180   |
| 21121 | Patient158   | Patient198   |
| 21121 | Patient180   | Patient196B  |
| 21122 | Patient034A  | Patient180   |
| 21122 | Patient058   | Patient099E  |
| 21122 | Patient058   | Patient159   |
| 21122 | Patient081E  | Patient189C2 |
| 21122 | Patient088   | Patient201B  |
| 21122 | Patient088   | Patient222A  |
| 21122 | Patient089A1 | Patient184   |
| 21122 | Patient089A2 | Patient222A  |
| 21122 | Patient093A  | Patient258C1 |
| 21122 | Patient093A  | Patient258C2 |
| 21122 | Patient123C  | Patient180   |
| 21122 | Patient145C  | Patient179   |
| 21122 | Patient179   | Patient265   |
| 21123 | Patient026A  | Patient069   |
| 21123 | Patient032B  | Patient180   |
| 21123 | Patient053A1 | Patient198   |
| 21123 | Patient058   | Patient103A  |
| 21123 | Patient089A1 | Patient201E  |
| 21123 | Patient089A1 | Patient222D  |
| 21123 | Patient089A1 | Patient246C  |
| 21123 | Patient089A2 | Patient201B  |
| 21123 | Patient093D  | Patient258C1 |
| 21123 | Patient093D  | Patient258C2 |
| 21123 | Patient131   | Patient193   |
| 21123 | Patient180   | Patient246D  |
| 21124 | Patient032A  | Patient180   |
| 21124 | Patient089A1 | Patient120B  |
| 21124 | Patient089A1 | Patient187   |
| 21124 | Patient089A1 | Patient196C  |
| 21124 | Patient089A1 | Patient196E  |
| 21124 | Patient089A1 | Patient222F  |
| 21124 | Patient090   | Patient258C1 |
| 21124 | Patient090   | Patient258C2 |

|       |              |              |
|-------|--------------|--------------|
| 21124 | Patient123A  | Patient179   |
| 21124 | Patient123B  | Patient180   |
| 21124 | Patient123C  | Patient179   |
| 21124 | Patient161B  | Patient180   |
| 21125 | Patient021A1 | Patient069   |
| 21125 | Patient026B  | Patient069   |
| 21125 | Patient081A2 | Patient189C2 |
| 21125 | Patient081B  | Patient189C1 |
| 21125 | Patient088   | Patient222B  |
| 21125 | Patient089A1 | Patient173A  |
| 21125 | Patient089A1 | Patient201A  |
| 21125 | Patient089A1 | Patient222E  |
| 21125 | Patient089A2 | Patient252B  |
| 21125 | Patient090   | Patient198   |
| 21126 | Patient058   | Patient181B  |
| 21126 | Patient074E  | Patient238   |
| 21126 | Patient081F  | Patient189C2 |
| 21126 | Patient088   | Patient252B  |
| 21126 | Patient089A2 | Patient103A  |
| 21126 | Patient092D  | Patient198   |
| 21126 | Patient094C  | Patient215   |
| 21126 | Patient123B  | Patient179   |
| 21126 | Patient123D  | Patient180   |
| 21126 | Patient152A  | Patient158   |
| 21126 | Patient171   | Patient196D  |
| 21126 | Patient180   | Patient263B  |
| 21127 | Patient026C  | Patient233   |
| 21127 | Patient026F  | Patient069   |
| 21127 | Patient029   | Patient195   |
| 21127 | Patient034E  | Patient180   |
| 21127 | Patient081E  | Patient189C1 |
| 21127 | Patient088   | Patient103A  |
| 21127 | Patient089A1 | Patient099A  |
| 21127 | Patient089A1 | Patient099B  |
| 21127 | Patient089A1 | Patient246E  |
| 21127 | Patient089A2 | Patient222B  |
| 21127 | Patient089A2 | Patient252D  |
| 21127 | Patient090   | Patient152B  |
| 21127 | Patient093C  | Patient198   |
| 21127 | Patient094B  | Patient215   |
| 21127 | Patient141B  | Patient189C2 |
| 21128 | Patient058   | Patient181A  |
| 21128 | Patient088   | Patient252D  |
| 21128 | Patient089A1 | Patient196B  |
| 21128 | Patient089A1 | Patient224A  |
| 21128 | Patient089A1 | Patient235C  |
| 21128 | Patient089A1 | Patient246B  |
| 21128 | Patient093B  | Patient215   |
| 21128 | Patient093E  | Patient215   |
| 21128 | Patient094A  | Patient215   |

|       |              |              |
|-------|--------------|--------------|
| 21128 | Patient094C  | Patient258C1 |
| 21128 | Patient094C  | Patient258C2 |
| 21128 | Patient120C  | Patient189C2 |
| 21128 | Patient123D  | Patient179   |
| 21128 | Patient141D  | Patient179   |
| 21128 | Patient149B  | Patient180   |
| 21129 | Patient029   | Patient235C  |
| 21129 | Patient034C  | Patient179   |
| 21129 | Patient034D  | Patient180   |
| 21129 | Patient079A1 | Patient089A1 |
| 21129 | Patient081A1 | Patient189C2 |
| 21129 | Patient088   | Patient127A  |
| 21129 | Patient088   | Patient181B  |
| 21129 | Patient088   | Patient196A  |
| 21129 | Patient089A1 | Patient218B  |
| 21129 | Patient089A1 | Patient236A  |
| 21129 | Patient089A2 | Patient127A  |
| 21129 | Patient089A2 | Patient181B  |
| 21129 | Patient089A2 | Patient196A  |
| 21129 | Patient090   | Patient152A  |
| 21129 | Patient094B  | Patient258C1 |
| 21129 | Patient094B  | Patient258C2 |
| 21129 | Patient108A  | Patient193   |
| 21129 | Patient120B  | Patient189C2 |
| 21129 | Patient120C  | Patient189C1 |
| 21129 | Patient120D  | Patient189C2 |
| 21129 | Patient189A  | Patient215   |
| 21129 | Patient193   | Patient224B  |
| 21129 | Patient215   | Patient258F  |
| 21130 | Patient034A  | Patient179   |
| 21130 | Patient058   | Patient252B  |
| 21130 | Patient069   | Patient120A  |
| 21130 | Patient089A1 | Patient246D  |
| 21130 | Patient089A2 | Patient236B  |
| 21130 | Patient093B  | Patient258C1 |
| 21130 | Patient093B  | Patient258C2 |
| 21130 | Patient120B  | Patient189C1 |
| 21130 | Patient120D  | Patient189C1 |
| 21130 | Patient180   | Patient265   |
| 21130 | Patient189B  | Patient215   |
| 21131 | Patient032B  | Patient179   |
| 21131 | Patient058   | Patient201B  |
| 21131 | Patient058   | Patient222A  |
| 21131 | Patient081A2 | Patient189C1 |
| 21131 | Patient081F  | Patient189C1 |
| 21131 | Patient086C  | Patient152B  |
| 21131 | Patient088   | Patient236B  |
| 21131 | Patient089A1 | Patient099C  |
| 21131 | Patient089A1 | Patient235B  |
| 21131 | Patient089A2 | Patient181A  |

|       |              |              |
|-------|--------------|--------------|
| 21131 | Patient093C  | Patient258C1 |
| 21131 | Patient093C  | Patient258C2 |
| 21131 | Patient141B  | Patient189C1 |
| 21131 | Patient152B  | Patient158   |
| 21131 | Patient189E  | Patient215   |
| 21132 | Patient026C  | Patient189C2 |
| 21132 | Patient032A  | Patient179   |
| 21132 | Patient089A1 | Patient220A  |
| 21132 | Patient108D  | Patient193   |
| 21132 | Patient141A  | Patient189C2 |
| 21132 | Patient158   | Patient215   |
| 21132 | Patient161B  | Patient179   |
| 21132 | Patient189C2 | Patient235A  |
| 21132 | Patient194   | Patient198   |
| 21133 | Patient029   | Patient235B  |
| 21133 | Patient058   | Patient252D  |
| 21133 | Patient079A2 | Patient089A1 |
| 21133 | Patient079B  | Patient089A1 |
| 21133 | Patient086C  | Patient152A  |
| 21133 | Patient086E  | Patient152B  |
| 21133 | Patient088   | Patient181A  |
| 21133 | Patient089A1 | Patient099D  |
| 21133 | Patient090   | Patient215   |
| 21133 | Patient090   | Patient233   |
| 21133 | Patient093C  | Patient152A  |
| 21133 | Patient093E  | Patient258C1 |
| 21133 | Patient093E  | Patient258C2 |
| 21133 | Patient094A  | Patient258C1 |
| 21133 | Patient094A  | Patient258C2 |
| 21133 | Patient097D  | Patient189C2 |
| 21133 | Patient114   | Patient126D  |
| 21133 | Patient141C  | Patient189C2 |
| 21133 | Patient204   | Patient215   |
| 21133 | Patient215   | Patient258B  |
| 21133 | Patient215   | Patient258G  |
| 21134 | Patient058   | Patient222B  |
| 21134 | Patient058   | Patient236B  |
| 21134 | Patient079C  | Patient089A1 |
| 21134 | Patient081A1 | Patient189C1 |
| 21134 | Patient086A  | Patient152B  |
| 21134 | Patient088   | Patient127B  |
| 21134 | Patient089A2 | Patient127B  |
| 21134 | Patient089A2 | Patient252A  |
| 21134 | Patient089A2 | Patient252F  |
| 21134 | Patient179   | Patient196D  |
| 21134 | Patient215   | Patient258A1 |
| 21134 | Patient215   | Patient258A2 |
| 21135 | Patient023   | Patient179   |
| 21135 | Patient034B  | Patient180   |
| 21135 | Patient034E  | Patient179   |

|       |              |              |
|-------|--------------|--------------|
| 21135 | Patient054   | Patient233   |
| 21135 | Patient086E  | Patient152A  |
| 21135 | Patient088   | Patient196C  |
| 21135 | Patient088   | Patient222D  |
| 21135 | Patient088   | Patient252A  |
| 21135 | Patient088   | Patient252F  |
| 21135 | Patient089A1 | Patient103C  |
| 21135 | Patient097A  | Patient189C2 |
| 21135 | Patient097D  | Patient189C1 |
| 21135 | Patient108B2 | Patient193   |
| 21135 | Patient126E  | Patient215   |
| 21135 | Patient215   | Patient258D  |
| 21136 | Patient058   | Patient127A  |
| 21136 | Patient086A  | Patient152A  |
| 21136 | Patient088   | Patient184   |
| 21136 | Patient088   | Patient187   |
| 21136 | Patient088   | Patient201E  |
| 21136 | Patient088   | Patient218A  |
| 21136 | Patient089A1 | Patient263B  |
| 21136 | Patient089A2 | Patient184   |
| 21136 | Patient089A2 | Patient218A  |
| 21136 | Patient094D  | Patient215   |
| 21136 | Patient094E  | Patient215   |
| 21136 | Patient121B  | Patient179   |
| 21136 | Patient141A  | Patient189C1 |
| 21136 | Patient150C  | Patient179   |
| 21136 | Patient150C  | Patient180   |
| 21136 | Patient152A  | Patient157   |
| 21136 | Patient208   | Patient258F  |
| 21136 | Patient233   | Patient241   |
| 21137 | Patient026C  | Patient189C1 |
| 21137 | Patient034D  | Patient179   |
| 21137 | Patient088   | Patient246C  |
| 21137 | Patient089A1 | Patient103B  |
| 21137 | Patient089A1 | Patient265   |
| 21137 | Patient089A2 | Patient201E  |
| 21137 | Patient089A2 | Patient222D  |
| 21137 | Patient089A2 | Patient246C  |
| 21137 | Patient097C  | Patient189C2 |
| 21137 | Patient109A  | Patient193   |
| 21137 | Patient121A  | Patient179   |
| 21137 | Patient121A  | Patient180   |
| 21137 | Patient141C  | Patient189C1 |
| 21137 | Patient189C1 | Patient235A  |
| 21138 | Patient069   | Patient126D  |
| 21138 | Patient086B  | Patient152B  |
| 21138 | Patient088   | Patient196E  |
| 21138 | Patient088   | Patient201A  |
| 21138 | Patient088   | Patient222F  |
| 21138 | Patient089A1 | Patient103D  |

|       |              |              |
|-------|--------------|--------------|
| 21138 | Patient089A1 | Patient108A  |
| 21138 | Patient089A2 | Patient187   |
| 21138 | Patient089A2 | Patient196C  |
| 21138 | Patient089A2 | Patient196E  |
| 21138 | Patient089A2 | Patient222F  |
| 21138 | Patient093C  | Patient152B  |
| 21138 | Patient094D  | Patient258C1 |
| 21138 | Patient094D  | Patient258C2 |
| 21138 | Patient094E  | Patient258C1 |
| 21138 | Patient094E  | Patient258C2 |
| 21138 | Patient097A  | Patient189C1 |
| 21138 | Patient108B1 | Patient193   |
| 21138 | Patient108G  | Patient193   |
| 21138 | Patient114   | Patient120B  |
| 21138 | Patient114   | Patient120C  |
| 21138 | Patient150A  | Patient180   |
| 21138 | Patient152A  | Patient194   |
| 21138 | Patient152B  | Patient194   |
| 21139 | Patient058   | Patient252F  |
| 21139 | Patient088   | Patient222E  |
| 21139 | Patient089A1 | Patient108D  |
| 21139 | Patient089A2 | Patient201A  |
| 21139 | Patient089A2 | Patient222E  |
| 21139 | Patient114   | Patient120D  |
| 21139 | Patient121B  | Patient180   |
| 21139 | Patient150A  | Patient179   |
| 21139 | Patient152A  | Patient247D  |
| 21140 | Patient086B  | Patient152A  |
| 21140 | Patient089A1 | Patient149B  |
| 21140 | Patient089A1 | Patient189A  |
| 21140 | Patient097C  | Patient189C1 |
| 21140 | Patient109B  | Patient193   |
| 21140 | Patient208   | Patient258A1 |
| 21140 | Patient208   | Patient258B  |
| 21141 | Patient034B  | Patient179   |
| 21141 | Patient058   | Patient127B  |
| 21141 | Patient058   | Patient196A  |
| 21141 | Patient058   | Patient252A  |
| 21141 | Patient069   | Patient252B  |
| 21141 | Patient086E  | Patient258C1 |
| 21141 | Patient086E  | Patient258C2 |
| 21141 | Patient088   | Patient099A  |
| 21141 | Patient088   | Patient099B  |
| 21141 | Patient088   | Patient246E  |
| 21141 | Patient089A1 | Patient103E  |
| 21141 | Patient089A1 | Patient109A  |
| 21141 | Patient089A1 | Patient189B  |
| 21141 | Patient089A2 | Patient099A  |
| 21141 | Patient089A2 | Patient099B  |
| 21141 | Patient089A2 | Patient246E  |



|       |              |              |
|-------|--------------|--------------|
| 21141 | Patient097B  | Patient189C2 |
| 21141 | Patient099E  | Patient215   |
| 21141 | Patient108H  | Patient193   |
| 21141 | Patient152B  | Patient157   |
| 21141 | Patient189C2 | Patient217A  |
| 21141 | Patient194   | Patient233   |
| 21141 | Patient198   | Patient207   |
| 21141 | Patient208   | Patient258A2 |
| 21141 | Patient208   | Patient258G  |
| 21142 | Patient058   | Patient218A  |
| 21142 | Patient058   | Patient246C  |
| 21142 | Patient086C  | Patient258C1 |
| 21142 | Patient086C  | Patient258C2 |
| 21142 | Patient088   | Patient196B  |
| 21142 | Patient088   | Patient246B  |
| 21142 | Patient089A1 | Patient189E  |
| 21142 | Patient089A2 | Patient196B  |
| 21142 | Patient089A2 | Patient246B  |
| 21142 | Patient171   | Patient173B  |
| 21142 | Patient180   | Patient196D  |
| 21142 | Patient208   | Patient210   |
| 21143 | Patient066D  | Patient069   |
| 21143 | Patient079A1 | Patient088   |
| 21143 | Patient079A1 | Patient089A2 |
| 21143 | Patient089A2 | Patient120C  |
| 21143 | Patient089A2 | Patient236A  |
| 21143 | Patient093B  | Patient198   |
| 21143 | Patient097E  | Patient189C2 |
| 21143 | Patient108F  | Patient193   |
| 21143 | Patient114   | Patient195   |
| 21143 | Patient157   | Patient215   |
| 21143 | Patient194   | Patient208   |
| 21143 | Patient208   | Patient258D  |
| 21144 | Patient058   | Patient201E  |
| 21144 | Patient058   | Patient224A  |
| 21144 | Patient066E  | Patient069   |
| 21144 | Patient069   | Patient220B  |
| 21144 | Patient088   | Patient120C  |
| 21144 | Patient088   | Patient218B  |
| 21144 | Patient088   | Patient236A  |
| 21144 | Patient088   | Patient246D  |
| 21144 | Patient089A1 | Patient108G  |
| 21144 | Patient089A2 | Patient120D  |
| 21144 | Patient089A2 | Patient218B  |
| 21144 | Patient089A2 | Patient246D  |
| 21144 | Patient097B  | Patient189C1 |
| 21144 | Patient109E  | Patient193   |
| 21144 | Patient152B  | Patient202   |
| 21144 | Patient152B  | Patient247D  |
| 21144 | Patient189C2 | Patient230A  |

|       |              |              |
|-------|--------------|--------------|
| 21144 | Patient213B  | Patient215   |
| 21145 | Patient058   | Patient184   |
| 21145 | Patient058   | Patient187   |
| 21145 | Patient058   | Patient196E  |
| 21145 | Patient088   | Patient099C  |
| 21145 | Patient088   | Patient120D  |
| 21145 | Patient089A2 | Patient099C  |
| 21145 | Patient089A2 | Patient224A  |
| 21145 | Patient109D  | Patient193   |
| 21145 | Patient120C  | Patient171   |
| 21145 | Patient152A  | Patient202   |
| 21145 | Patient180   | Patient230D  |
| 21145 | Patient189C2 | Patient217I  |
| 21146 | Patient058   | Patient173A  |
| 21146 | Patient058   | Patient196C  |
| 21146 | Patient058   | Patient246E  |
| 21146 | Patient086A  | Patient258C1 |
| 21146 | Patient086A  | Patient258C2 |
| 21146 | Patient088   | Patient120B  |
| 21146 | Patient088   | Patient220A  |
| 21146 | Patient088   | Patient224A  |
| 21146 | Patient089A1 | Patient109B  |
| 21146 | Patient089A2 | Patient220A  |
| 21146 | Patient093D  | Patient233   |
| 21146 | Patient097E  | Patient189C1 |
| 21146 | Patient109C  | Patient193   |
| 21146 | Patient120D  | Patient171   |
| 21146 | Patient131   | Patient179   |
| 21146 | Patient157   | Patient198   |
| 21146 | Patient189C1 | Patient217A  |
| 21146 | Patient189C2 | Patient217B  |
| 21146 | Patient201B  | Patient215   |
| 21146 | Patient215   | Patient232B  |
| 21146 | Patient215   | Patient236B  |
| 21147 | Patient026A  | Patient189C2 |
| 21147 | Patient058   | Patient120C  |
| 21147 | Patient058   | Patient201A  |
| 21147 | Patient058   | Patient222D  |
| 21147 | Patient058   | Patient222F  |
| 21147 | Patient058   | Patient235C  |
| 21147 | Patient079A2 | Patient088   |
| 21147 | Patient079A2 | Patient089A2 |
| 21147 | Patient079B  | Patient088   |
| 21147 | Patient079B  | Patient089A2 |
| 21147 | Patient088   | Patient099D  |
| 21147 | Patient089A2 | Patient099D  |
| 21147 | Patient089A2 | Patient120B  |
| 21147 | Patient093A  | Patient233   |
| 21147 | Patient120B  | Patient171   |
| 21147 | Patient121A  | Patient233   |

|       |              |              |
|-------|--------------|--------------|
| 21147 | Patient189C2 | Patient217C  |
| 21147 | Patient189C2 | Patient217D  |
| 21147 | Patient189C2 | Patient217F  |
| 21147 | Patient189C2 | Patient217H  |
| 21147 | Patient192D  | Patient233   |
| 21147 | Patient215   | Patient222A  |
| 21147 | Patient215   | Patient247D  |
| 21148 | Patient032D  | Patient208   |
| 21148 | Patient058   | Patient099B  |
| 21148 | Patient058   | Patient120D  |
| 21148 | Patient058   | Patient246B  |
| 21148 | Patient058   | Patient246D  |
| 21148 | Patient079C  | Patient088   |
| 21148 | Patient079C  | Patient089A2 |
| 21148 | Patient189C1 | Patient230A  |
| 21148 | Patient215   | Patient246A  |
| 21148 | Patient215   | Patient252D  |
| 21148 | Patient217A  | Patient233   |
| 21148 | Patient233   | Patient261G  |
| 21149 | Patient058   | Patient099A  |
| 21149 | Patient058   | Patient196B  |
| 21149 | Patient058   | Patient222E  |
| 21149 | Patient058   | Patient236A  |
| 21149 | Patient066F  | Patient069   |
| 21149 | Patient086B  | Patient258C1 |
| 21149 | Patient086B  | Patient258C2 |
| 21149 | Patient089A1 | Patient108H  |
| 21149 | Patient089A2 | Patient173A  |
| 21149 | Patient089A2 | Patient235C  |
| 21149 | Patient091A  | Patient208   |
| 21149 | Patient093B  | Patient152A  |
| 21149 | Patient158   | Patient208   |
| 21149 | Patient215   | Patient232E  |
| 21150 | Patient026B  | Patient189C2 |
| 21150 | Patient058   | Patient120B  |
| 21150 | Patient058   | Patient218B  |
| 21150 | Patient058   | Patient235B  |
| 21150 | Patient069   | Patient252F  |
| 21150 | Patient088   | Patient108A  |
| 21150 | Patient088   | Patient235C  |
| 21150 | Patient088   | Patient263B  |
| 21150 | Patient089A2 | Patient108A  |
| 21150 | Patient089A2 | Patient263B  |
| 21150 | Patient189C1 | Patient217I  |
| 21150 | Patient189C2 | Patient217E  |
| 21150 | Patient189C2 | Patient235C  |
| 21150 | Patient201A  | Patient215   |
| 21150 | Patient201E  | Patient215   |
| 21150 | Patient215   | Patient247A  |
| 21151 | Patient026F  | Patient189C2 |

|       |              |              |
|-------|--------------|--------------|
| 21151 | Patient028   | Patient208   |
| 21151 | Patient058   | Patient079A1 |
| 21151 | Patient079A1 | Patient114   |
| 21151 | Patient088   | Patient173A  |
| 21151 | Patient088   | Patient265   |
| 21151 | Patient089A1 | Patient108F  |
| 21151 | Patient089A1 | Patient196D  |
| 21151 | Patient089A2 | Patient265   |
| 21151 | Patient094D  | Patient198   |
| 21151 | Patient100A  | Patient233   |
| 21151 | Patient150B  | Patient179   |
| 21151 | Patient150B  | Patient180   |
| 21151 | Patient189C1 | Patient217B  |
| 21152 | Patient026A  | Patient189C1 |
| 21152 | Patient069   | Patient181A  |
| 21152 | Patient069   | Patient181B  |
| 21152 | Patient069   | Patient252A  |
| 21152 | Patient088   | Patient108D  |
| 21152 | Patient089A1 | Patient109D  |
| 21152 | Patient089A1 | Patient109E  |
| 21152 | Patient089A2 | Patient108D  |
| 21152 | Patient089A2 | Patient235B  |
| 21152 | Patient093B  | Patient233   |
| 21152 | Patient152A  | Patient246A  |
| 21152 | Patient189C1 | Patient217C  |
| 21152 | Patient189C1 | Patient217D  |
| 21152 | Patient189C1 | Patient217F  |
| 21152 | Patient189C1 | Patient217H  |
| 21152 | Patient215   | Patient247B  |
| 21152 | Patient215   | Patient247C  |
| 21152 | Patient215   | Patient263B  |
| 21152 | Patient258C1 | Patient261G  |
| 21152 | Patient258C2 | Patient261G  |
| 21153 | Patient058   | Patient099C  |
| 21153 | Patient058   | Patient220A  |
| 21153 | Patient079B  | Patient114   |
| 21153 | Patient088   | Patient189B  |
| 21153 | Patient088   | Patient235B  |
| 21153 | Patient089A2 | Patient189B  |
| 21153 | Patient093C  | Patient233   |
| 21153 | Patient094C  | Patient233   |
| 21153 | Patient094E  | Patient198   |
| 21153 | Patient114   | Patient220B  |
| 21153 | Patient152B  | Patient258F  |
| 21153 | Patient159   | Patient215   |
| 21153 | Patient179   | Patient230D  |
| 21153 | Patient189C2 | Patient235B  |
| 21153 | Patient215   | Patient232A  |
| 21153 | Patient215   | Patient232D  |
| 21153 | Patient217E  | Patient233   |

|       |              |              |
|-------|--------------|--------------|
| 21153 | Patient217H  | Patient233   |
| 21154 | Patient058   | Patient079C  |
| 21154 | Patient058   | Patient103D  |
| 21154 | Patient069   | Patient126A  |
| 21154 | Patient088   | Patient149B  |
| 21154 | Patient089A2 | Patient149B  |
| 21154 | Patient089A2 | Patient189A  |
| 21154 | Patient093B  | Patient152B  |
| 21154 | Patient094B  | Patient233   |
| 21154 | Patient196A  | Patient215   |
| 21154 | Patient215   | Patient232C  |
| 21154 | Patient217B  | Patient233   |
| 21154 | Patient217D  | Patient233   |
| 21154 | Patient217I  | Patient233   |
| 21155 | Patient026B  | Patient189C1 |
| 21155 | Patient029   | Patient074D  |
| 21155 | Patient058   | Patient079A2 |
| 21155 | Patient058   | Patient099D  |
| 21155 | Patient088   | Patient109A  |
| 21155 | Patient088   | Patient189A  |
| 21155 | Patient089A1 | Patient109C  |
| 21155 | Patient089A2 | Patient109A  |
| 21155 | Patient094A  | Patient233   |
| 21155 | Patient104A  | Patient215   |
| 21155 | Patient152A  | Patient258F  |
| 21155 | Patient189C1 | Patient217E  |
| 21155 | Patient189C1 | Patient235C  |
| 21155 | Patient189C2 | Patient230B  |
| 21155 | Patient196B  | Patient215   |
| 21155 | Patient215   | Patient236A  |
| 21155 | Patient215   | Patient247E  |
| 21155 | Patient215   | Patient258E  |
| 21155 | Patient217C  | Patient233   |
| 21155 | Patient217F  | Patient233   |
| 21156 | Patient021A2 | Patient100B  |
| 21156 | Patient026F  | Patient189C1 |
| 21156 | Patient058   | Patient079B  |
| 21156 | Patient058   | Patient103C  |
| 21156 | Patient079A2 | Patient114   |
| 21156 | Patient088   | Patient189E  |
| 21156 | Patient089A2 | Patient189E  |
| 21156 | Patient093E  | Patient233   |
| 21156 | Patient099A  | Patient215   |
| 21156 | Patient104B  | Patient215   |
| 21156 | Patient152A  | Patient247A  |
| 21156 | Patient152A  | Patient247B  |
| 21156 | Patient189C2 | Patient217J  |
| 21156 | Patient196C  | Patient215   |
| 21156 | Patient215   | Patient222B  |
| 21157 | Patient023   | Patient180   |

|       |              |              |
|-------|--------------|--------------|
| 21157 | Patient058   | Patient103B  |
| 21157 | Patient058   | Patient103E  |
| 21157 | Patient058   | Patient263B  |
| 21157 | Patient079C  | Patient114   |
| 21157 | Patient088   | Patient103C  |
| 21157 | Patient094D  | Patient152A  |
| 21157 | Patient100A  | Patient152A  |
| 21157 | Patient152A  | Patient247C  |
| 21157 | Patient152B  | Patient246A  |
| 21157 | Patient152B  | Patient258A1 |
| 21157 | Patient152B  | Patient258B  |
| 21157 | Patient198   | Patient247D  |
| 21157 | Patient208   | Patient251   |
| 21158 | Patient021A1 | Patient100B  |
| 21158 | Patient058   | Patient265   |
| 21158 | Patient088   | Patient108G  |
| 21158 | Patient089A2 | Patient103C  |
| 21158 | Patient089A2 | Patient108G  |
| 21158 | Patient152B  | Patient258A2 |
| 21158 | Patient152B  | Patient258G  |
| 21158 | Patient189C1 | Patient235B  |
| 21158 | Patient196E  | Patient215   |
| 21158 | Patient215   | Patient220A  |
| 21159 | Patient058   | Patient149B  |
| 21159 | Patient094E  | Patient152A  |
| 21159 | Patient131   | Patient180   |
| 21159 | Patient152A  | Patient258A1 |
| 21159 | Patient152A  | Patient258B  |
| 21159 | Patient189C1 | Patient230B  |
| 21159 | Patient215   | Patient222E  |
| 21160 | Patient058   | Patient108A  |
| 21160 | Patient069   | Patient224B  |
| 21160 | Patient088   | Patient109B  |
| 21160 | Patient089A2 | Patient103B  |
| 21160 | Patient089A2 | Patient109B  |
| 21160 | Patient094D  | Patient233   |
| 21160 | Patient094E  | Patient233   |
| 21160 | Patient108B2 | Patient179   |
| 21160 | Patient152A  | Patient258A2 |
| 21160 | Patient152A  | Patient258G  |
| 21160 | Patient152B  | Patient258D  |
| 21160 | Patient215   | Patient222D  |
| 21160 | Patient217J  | Patient233   |
| 21161 | Patient058   | Patient189B  |
| 21161 | Patient088   | Patient103B  |
| 21161 | Patient089A2 | Patient103D  |
| 21161 | Patient099B  | Patient215   |
| 21161 | Patient121B  | Patient233   |
| 21161 | Patient152B  | Patient242   |
| 21161 | Patient152B  | Patient247A  |

|       |              |              |
|-------|--------------|--------------|
| 21161 | Patient152B  | Patient247B  |
| 21161 | Patient184   | Patient215   |
| 21161 | Patient189C1 | Patient217J  |
| 21161 | Patient215   | Patient246C  |
| 21161 | Patient215   | Patient265   |
| 21162 | Patient029   | Patient074B  |
| 21162 | Patient058   | Patient189A  |
| 21162 | Patient088   | Patient103D  |
| 21162 | Patient094D  | Patient152B  |
| 21162 | Patient100A  | Patient152B  |
| 21162 | Patient127B  | Patient215   |
| 21162 | Patient152A  | Patient258D  |
| 21162 | Patient152B  | Patient247C  |
| 21162 | Patient187   | Patient215   |
| 21162 | Patient198   | Patient246A  |
| 21162 | Patient215   | Patient222F  |
| 21163 | Patient029   | Patient074A  |
| 21163 | Patient029   | Patient074C  |
| 21163 | Patient058   | Patient108D  |
| 21163 | Patient088   | Patient108H  |
| 21163 | Patient089A2 | Patient108H  |
| 21163 | Patient099C  | Patient215   |
| 21163 | Patient100A  | Patient215   |
| 21163 | Patient108B1 | Patient179   |
| 21163 | Patient127A  | Patient215   |
| 21163 | Patient149B  | Patient215   |
| 21163 | Patient158   | Patient233   |
| 21163 | Patient171   | Patient235C  |
| 21163 | Patient215   | Patient246B  |
| 21164 | Patient089A2 | Patient103E  |
| 21164 | Patient094E  | Patient152B  |
| 21164 | Patient152A  | Patient242   |
| 21164 | Patient158   | Patient258C1 |
| 21164 | Patient158   | Patient258C2 |
| 21164 | Patient215   | Patient246D  |
| 21165 | Patient058   | Patient189E  |
| 21165 | Patient088   | Patient103E  |
| 21165 | Patient088   | Patient108F  |
| 21165 | Patient088   | Patient109E  |
| 21165 | Patient088   | Patient196D  |
| 21165 | Patient089A2 | Patient108F  |
| 21165 | Patient089A2 | Patient196D  |
| 21165 | Patient099D  | Patient215   |
| 21165 | Patient213B  | Patient233   |
| 21166 | Patient088   | Patient109D  |
| 21166 | Patient089A2 | Patient109D  |
| 21166 | Patient089A2 | Patient109E  |
| 21166 | Patient133   | Patient215   |
| 21166 | Patient198   | Patient247A  |
| 21166 | Patient198   | Patient247B  |

|       |              |              |
|-------|--------------|--------------|
| 21167 | Patient053A1 | Patient208   |
| 21167 | Patient058   | Patient109A  |
| 21167 | Patient089A1 | Patient097D  |
| 21167 | Patient126D  | Patient193   |
| 21167 | Patient152A  | Patient213B  |
| 21167 | Patient198   | Patient247C  |
| 21168 | Patient058   | Patient108G  |
| 21168 | Patient069   | Patient103C  |
| 21168 | Patient089A1 | Patient097C  |
| 21168 | Patient108B2 | Patient180   |
| 21168 | Patient152A  | Patient247E  |
| 21168 | Patient171   | Patient235B  |
| 21169 | Patient029   | Patient074E  |
| 21169 | Patient058   | Patient109B  |
| 21169 | Patient081C  | Patient233   |
| 21169 | Patient088   | Patient109C  |
| 21169 | Patient089A1 | Patient097A  |
| 21169 | Patient089A2 | Patient109C  |
| 21169 | Patient114   | Patient173A  |
| 21169 | Patient189A  | Patient233   |
| 21169 | Patient205   | Patient215   |
| 21170 | Patient097D  | Patient114   |
| 21170 | Patient189C2 | Patient230F  |
| 21170 | Patient204   | Patient258C1 |
| 21170 | Patient204   | Patient258C2 |
| 21170 | Patient215   | Patient218A  |
| 21171 | Patient058   | Patient108H  |
| 21171 | Patient141G  | Patient233   |
| 21171 | Patient167   | Patient215   |
| 21171 | Patient189B  | Patient233   |
| 21171 | Patient189E  | Patient233   |
| 21171 | Patient233   | Patient235A  |
| 21172 | Patient069   | Patient103B  |
| 21172 | Patient097C  | Patient114   |
| 21172 | Patient108B1 | Patient180   |
| 21172 | Patient114   | Patient235C  |
| 21172 | Patient126E  | Patient258C1 |
| 21172 | Patient126E  | Patient258C2 |
| 21172 | Patient141G  | Patient258C1 |
| 21172 | Patient141G  | Patient258C2 |
| 21172 | Patient152B  | Patient213B  |
| 21172 | Patient230C  | Patient233   |
| 21173 | Patient032E  | Patient215   |
| 21173 | Patient058   | Patient108F  |
| 21173 | Patient152B  | Patient247E  |
| 21173 | Patient189C2 | Patient230E  |
| 21173 | Patient193   | Patient235C  |
| 21173 | Patient215   | Patient246E  |
| 21174 | Patient081E  | Patient233   |
| 21174 | Patient089A1 | Patient097B  |



|       |              |              |
|-------|--------------|--------------|
| 21174 | Patient092D  | Patient208   |
| 21174 | Patient097A  | Patient114   |
| 21174 | Patient230C  | Patient258C1 |
| 21174 | Patient230C  | Patient258C2 |
| 21175 | Patient026C  | Patient215   |
| 21175 | Patient032C  | Patient215   |
| 21175 | Patient058   | Patient109E  |
| 21175 | Patient058   | Patient196D  |
| 21175 | Patient069   | Patient224A  |
| 21175 | Patient081F  | Patient233   |
| 21175 | Patient104A  | Patient233   |
| 21175 | Patient114   | Patient235B  |
| 21175 | Patient126D  | Patient152A  |
| 21175 | Patient126D  | Patient233   |
| 21175 | Patient215   | Patient218B  |
| 21176 | Patient058   | Patient109C  |
| 21176 | Patient058   | Patient109D  |
| 21176 | Patient066D  | Patient189C2 |
| 21176 | Patient104B  | Patient233   |
| 21176 | Patient152B  | Patient258E  |
| 21176 | Patient173A  | Patient193   |
| 21176 | Patient189C1 | Patient230F  |
| 21177 | Patient081B  | Patient233   |
| 21177 | Patient089A1 | Patient097E  |
| 21177 | Patient126C  | Patient189C2 |
| 21177 | Patient189A  | Patient258C1 |
| 21177 | Patient189A  | Patient258C2 |
| 21177 | Patient189C1 | Patient230E  |
| 21178 | Patient097B  | Patient114   |
| 21178 | Patient152A  | Patient258E  |
| 21178 | Patient196D  | Patient215   |
| 21178 | Patient198   | Patient247E  |
| 21178 | Patient230G  | Patient233   |
| 21179 | Patient066E  | Patient189C2 |
| 21179 | Patient081D  | Patient233   |
| 21179 | Patient141F  | Patient233   |
| 21179 | Patient173B  | Patient189C2 |
| 21179 | Patient189B  | Patient258C1 |
| 21179 | Patient189B  | Patient258C2 |
| 21179 | Patient189E  | Patient258C1 |
| 21179 | Patient189E  | Patient258C2 |
| 21179 | Patient193   | Patient235B  |
| 21179 | Patient198   | Patient213B  |
| 21180 | Patient079A1 | Patient193   |
| 21180 | Patient081A2 | Patient233   |
| 21180 | Patient103B  | Patient114   |
| 21180 | Patient103C  | Patient114   |
| 21180 | Patient126D  | Patient152B  |
| 21180 | Patient133   | Patient258C1 |
| 21180 | Patient133   | Patient258C2 |

|       |              |              |
|-------|--------------|--------------|
| 21180 | Patient141F  | Patient258C1 |
| 21180 | Patient141F  | Patient258C2 |
| 21180 | Patient141G  | Patient215   |
| 21180 | Patient215   | Patient230C  |
| 21181 | Patient066D  | Patient189C1 |
| 21181 | Patient081A1 | Patient233   |
| 21181 | Patient088   | Patient097D  |
| 21181 | Patient089A1 | Patient195   |
| 21181 | Patient089A2 | Patient097D  |
| 21181 | Patient097E  | Patient114   |
| 21181 | Patient104B  | Patient152A  |
| 21181 | Patient230G  | Patient258C1 |
| 21181 | Patient230G  | Patient258C2 |
| 21181 | Patient232B  | Patient258C1 |
| 21181 | Patient232B  | Patient258C2 |
| 21181 | Patient233   | Patient247D  |
| 21182 | Patient021A2 | Patient238   |
| 21182 | Patient032A  | Patient215   |
| 21182 | Patient069   | Patient108B2 |
| 21182 | Patient079B  | Patient193   |
| 21182 | Patient088   | Patient097A  |
| 21182 | Patient088   | Patient097C  |
| 21182 | Patient089A2 | Patient097C  |
| 21182 | Patient126C  | Patient189C1 |
| 21182 | Patient198   | Patient204   |
| 21182 | Patient198   | Patient242   |
| 21182 | Patient215   | Patient261C  |
| 21182 | Patient215   | Patient261E  |
| 21182 | Patient232E  | Patient258C1 |
| 21182 | Patient232E  | Patient258C2 |
| 21183 | Patient066F  | Patient189C2 |
| 21183 | Patient079C  | Patient193   |
| 21183 | Patient089A2 | Patient097A  |
| 21183 | Patient099E  | Patient233   |
| 21183 | Patient104A  | Patient152A  |
| 21183 | Patient133   | Patient152B  |
| 21183 | Patient141B  | Patient233   |
| 21183 | Patient141D  | Patient233   |
| 21183 | Patient157   | Patient233   |
| 21184 | Patient021A1 | Patient238   |
| 21184 | Patient034A  | Patient215   |
| 21184 | Patient053C  | Patient233   |
| 21184 | Patient066E  | Patient189C1 |
| 21184 | Patient079A1 | Patient171   |
| 21184 | Patient079A2 | Patient193   |
| 21184 | Patient114   | Patient224A  |
| 21184 | Patient141A  | Patient233   |
| 21184 | Patient152A  | Patient189A  |
| 21184 | Patient152A  | Patient189E  |
| 21184 | Patient173B  | Patient189C1 |

|       |              |              |
|-------|--------------|--------------|
| 21184 | Patient213B  | Patient258C1 |
| 21184 | Patient213B  | Patient258C2 |
| 21185 | Patient021A2 | Patient089A1 |
| 21185 | Patient032B  | Patient215   |
| 21185 | Patient097A  | Patient152A  |
| 21185 | Patient133   | Patient152A  |
| 21185 | Patient141C  | Patient233   |
| 21185 | Patient145B  | Patient215   |
| 21185 | Patient215   | Patient261A  |
| 21185 | Patient215   | Patient261G  |
| 21185 | Patient230A  | Patient233   |
| 21186 | Patient026D  | Patient233   |
| 21186 | Patient058   | Patient097D  |
| 21186 | Patient069   | Patient108B1 |
| 21186 | Patient099E  | Patient152A  |
| 21186 | Patient103C  | Patient171   |
| 21186 | Patient104B  | Patient152B  |
| 21186 | Patient126D  | Patient215   |
| 21186 | Patient133   | Patient198   |
| 21186 | Patient141F  | Patient215   |
| 21186 | Patient152B  | Patient164   |
| 21186 | Patient152B  | Patient167   |
| 21186 | Patient152B  | Patient206   |
| 21186 | Patient164   | Patient233   |
| 21186 | Patient215   | Patient230G  |
| 21186 | Patient215   | Patient261D  |
| 21186 | Patient232A  | Patient258C1 |
| 21186 | Patient232A  | Patient258C2 |
| 21186 | Patient232D  | Patient258C1 |
| 21186 | Patient232D  | Patient258C2 |
| 21187 | Patient026C  | Patient152B  |
| 21187 | Patient026E  | Patient233   |
| 21187 | Patient053A2 | Patient233   |
| 21187 | Patient053B  | Patient233   |
| 21187 | Patient069   | Patient235C  |
| 21187 | Patient079B  | Patient171   |
| 21187 | Patient097A  | Patient233   |
| 21187 | Patient103B  | Patient171   |
| 21187 | Patient152A  | Patient189B  |
| 21187 | Patient152A  | Patient206   |
| 21187 | Patient183D  | Patient215   |
| 21187 | Patient232C  | Patient258C1 |
| 21187 | Patient232C  | Patient258C2 |
| 21187 | Patient233   | Patient236B  |
| 21188 | Patient021A1 | Patient089A1 |
| 21188 | Patient034E  | Patient215   |
| 21188 | Patient066F  | Patient189C1 |
| 21188 | Patient079A2 | Patient171   |
| 21188 | Patient088   | Patient097B  |
| 21188 | Patient089A2 | Patient097B  |

|       |              |              |
|-------|--------------|--------------|
| 21188 | Patient104A  | Patient152B  |
| 21188 | Patient152A  | Patient164   |
| 21188 | Patient152A  | Patient167   |
| 21188 | Patient171   | Patient252B  |
| 21188 | Patient201B  | Patient233   |
| 21188 | Patient222A  | Patient233   |
| 21188 | Patient233   | Patient252D  |
| 21189 | Patient026C  | Patient152A  |
| 21189 | Patient032B  | Patient233   |
| 21189 | Patient058   | Patient097A  |
| 21189 | Patient058   | Patient097C  |
| 21189 | Patient079C  | Patient171   |
| 21189 | Patient086C  | Patient198   |
| 21189 | Patient103B  | Patient193   |
| 21189 | Patient120C  | Patient193   |
| 21189 | Patient120D  | Patient193   |
| 21189 | Patient133   | Patient233   |
| 21189 | Patient152A  | Patient204   |
| 21189 | Patient152B  | Patient189A  |
| 21189 | Patient152B  | Patient189E  |
| 21189 | Patient181B  | Patient189C2 |
| 21189 | Patient189A  | Patient198   |
| 21189 | Patient189E  | Patient198   |
| 21190 | Patient032E  | Patient233   |
| 21190 | Patient097A  | Patient152B  |
| 21190 | Patient103C  | Patient193   |
| 21190 | Patient192D  | Patient215   |
| 21190 | Patient215   | Patient261B  |
| 21191 | Patient034D  | Patient215   |
| 21191 | Patient069   | Patient235B  |
| 21191 | Patient086E  | Patient198   |
| 21191 | Patient088   | Patient097E  |
| 21191 | Patient089A2 | Patient097E  |
| 21191 | Patient097D  | Patient152A  |
| 21191 | Patient099E  | Patient152B  |
| 21191 | Patient120B  | Patient193   |
| 21191 | Patient167   | Patient233   |
| 21191 | Patient167   | Patient258C1 |
| 21191 | Patient167   | Patient258C2 |
| 21191 | Patient171   | Patient224A  |
| 21191 | Patient181A  | Patient189C2 |
| 21191 | Patient201E  | Patient233   |
| 21191 | Patient208   | Patient261G  |
| 21191 | Patient233   | Patient246A  |
| 21192 | Patient032A  | Patient233   |
| 21192 | Patient034B  | Patient215   |
| 21192 | Patient086A  | Patient198   |
| 21192 | Patient104B  | Patient198   |
| 21192 | Patient126E  | Patient198   |
| 21192 | Patient126E  | Patient233   |

|       |              |              |
|-------|--------------|--------------|
| 21192 | Patient152A  | Patient236B  |
| 21192 | Patient152B  | Patient189B  |
| 21192 | Patient189B  | Patient198   |
| 21192 | Patient201A  | Patient233   |
| 21193 | Patient032C  | Patient233   |
| 21193 | Patient032E  | Patient258C1 |
| 21193 | Patient032E  | Patient258C2 |
| 21193 | Patient034C  | Patient215   |
| 21193 | Patient097B  | Patient233   |
| 21193 | Patient097D  | Patient233   |
| 21193 | Patient179   | Patient220B  |
| 21193 | Patient233   | Patient247C  |
| 21194 | Patient034A  | Patient233   |
| 21194 | Patient069   | Patient108A  |
| 21194 | Patient097B  | Patient152A  |
| 21194 | Patient104A  | Patient198   |
| 21194 | Patient152B  | Patient204   |
| 21194 | Patient167   | Patient198   |
| 21194 | Patient181A  | Patient189C1 |
| 21194 | Patient222B  | Patient233   |
| 21194 | Patient233   | Patient247B  |
| 21195 | Patient021A2 | Patient088   |
| 21195 | Patient058   | Patient097B  |
| 21195 | Patient079B  | Patient233   |
| 21195 | Patient126D  | Patient179   |
| 21195 | Patient181B  | Patient189C1 |
| 21195 | Patient183B  | Patient215   |
| 21195 | Patient230D  | Patient233   |
| 21195 | Patient233   | Patient247A  |
| 21196 | Patient021A1 | Patient233   |
| 21196 | Patient032C  | Patient258C1 |
| 21196 | Patient032C  | Patient258C2 |
| 21196 | Patient086B  | Patient198   |
| 21196 | Patient092G  | Patient233   |
| 21196 | Patient097C  | Patient152A  |
| 21196 | Patient097C  | Patient233   |
| 21196 | Patient097D  | Patient152B  |
| 21196 | Patient126E  | Patient152A  |
| 21196 | Patient152A  | Patient201E  |
| 21196 | Patient152B  | Patient192D  |
| 21196 | Patient171   | Patient252F  |
| 21196 | Patient193   | Patient224A  |
| 21196 | Patient233   | Patient263B  |
| 21197 | Patient021A1 | Patient152A  |
| 21197 | Patient021A2 | Patient233   |
| 21197 | Patient045C  | Patient233   |
| 21197 | Patient058   | Patient097E  |
| 21197 | Patient069   | Patient108D  |
| 21197 | Patient079A1 | Patient233   |
| 21197 | Patient099E  | Patient198   |

|       |              |              |
|-------|--------------|--------------|
| 21197 | Patient127B  | Patient233   |
| 21197 | Patient152A  | Patient252D  |
| 21197 | Patient152B  | Patient236B  |
| 21197 | Patient171   | Patient252A  |
| 21197 | Patient183D  | Patient233   |
| 21197 | Patient233   | Patient247E  |
| 21198 | Patient021A1 | Patient088   |
| 21198 | Patient021A2 | Patient152A  |
| 21198 | Patient034E  | Patient233   |
| 21198 | Patient045A  | Patient233   |
| 21198 | Patient079A2 | Patient233   |
| 21198 | Patient079C  | Patient233   |
| 21198 | Patient099A  | Patient233   |
| 21198 | Patient141D  | Patient215   |
| 21198 | Patient152A  | Patient192D  |
| 21198 | Patient152A  | Patient201A  |
| 21198 | Patient152A  | Patient220A  |
| 21198 | Patient193   | Patient220B  |
| 21198 | Patient233   | Patient261C  |
| 21198 | Patient233   | Patient261E  |
| 21199 | Patient053C  | Patient215   |
| 21199 | Patient092G  | Patient215   |
| 21199 | Patient097B  | Patient152B  |
| 21199 | Patient104A  | Patient258C1 |
| 21199 | Patient104A  | Patient258C2 |
| 21199 | Patient123A  | Patient215   |
| 21199 | Patient123B  | Patient215   |
| 21199 | Patient123C  | Patient215   |
| 21199 | Patient152A  | Patient222A  |
| 21199 | Patient152A  | Patient222B  |
| 21199 | Patient222E  | Patient233   |
| 21199 | Patient230F  | Patient233   |
| 21199 | Patient233   | Patient236A  |
| 21199 | Patient233   | Patient261A  |
| 21200 | Patient021A2 | Patient089A2 |
| 21200 | Patient034C  | Patient233   |
| 21200 | Patient092G  | Patient152B  |
| 21200 | Patient104B  | Patient258C1 |
| 21200 | Patient104B  | Patient258C2 |
| 21200 | Patient145B  | Patient258C2 |
| 21200 | Patient152A  | Patient201B  |
| 21200 | Patient159   | Patient233   |
| 21200 | Patient161B  | Patient233   |
| 21200 | Patient171   | Patient173A  |
| 21200 | Patient222D  | Patient233   |
| 21200 | Patient232B  | Patient233   |
| 21200 | Patient233   | Patient261D  |
| 21201 | Patient045B  | Patient233   |
| 21201 | Patient053A2 | Patient215   |
| 21201 | Patient053B  | Patient215   |

|       |              |              |
|-------|--------------|--------------|
| 21201 | Patient066D  | Patient233   |
| 21201 | Patient092H  | Patient233   |
| 21201 | Patient097C  | Patient152B  |
| 21201 | Patient097E  | Patient152A  |
| 21201 | Patient103A  | Patient180   |
| 21201 | Patient126E  | Patient152B  |
| 21201 | Patient127A  | Patient233   |
| 21201 | Patient145B  | Patient233   |
| 21201 | Patient145B  | Patient258C1 |
| 21201 | Patient149B  | Patient233   |
| 21201 | Patient152A  | Patient263B  |
| 21201 | Patient152B  | Patient201E  |
| 21201 | Patient171   | Patient195   |
| 21201 | Patient184   | Patient233   |
| 21201 | Patient198   | Patient232B  |
| 21201 | Patient230B  | Patient233   |
| 21201 | Patient233   | Patient246C  |
| 21202 | Patient021A1 | Patient152B  |
| 21202 | Patient034D  | Patient233   |
| 21202 | Patient069   | Patient109A  |
| 21202 | Patient079A1 | Patient152A  |
| 21202 | Patient092G  | Patient152A  |
| 21202 | Patient097E  | Patient233   |
| 21202 | Patient099E  | Patient258C1 |
| 21202 | Patient099E  | Patient258C2 |
| 21202 | Patient152B  | Patient252D  |
| 21202 | Patient187   | Patient233   |
| 21202 | Patient206   | Patient233   |
| 21202 | Patient233   | Patient246B  |
| 21203 | Patient021A1 | Patient089A2 |
| 21203 | Patient021A2 | Patient152B  |
| 21203 | Patient069   | Patient108G  |
| 21203 | Patient092H  | Patient215   |
| 21203 | Patient099B  | Patient233   |
| 21203 | Patient108B2 | Patient233   |
| 21203 | Patient108D  | Patient233   |
| 21203 | Patient145C  | Patient215   |
| 21203 | Patient152B  | Patient201A  |
| 21203 | Patient152B  | Patient220A  |
| 21203 | Patient183D  | Patient258C1 |
| 21203 | Patient183D  | Patient258C2 |
| 21203 | Patient183E  | Patient215   |
| 21203 | Patient189C2 | Patient224B  |
| 21203 | Patient198   | Patient236B  |
| 21203 | Patient205   | Patient258C1 |
| 21203 | Patient205   | Patient258C2 |
| 21203 | Patient206   | Patient258C1 |
| 21203 | Patient206   | Patient258C2 |
| 21203 | Patient220A  | Patient233   |
| 21203 | Patient222F  | Patient233   |

|       |              |              |
|-------|--------------|--------------|
| 21203 | Patient232E  | Patient233   |
| 21203 | Patient233   | Patient261B  |
| 21203 | Patient233   | Patient265   |
| 21203 | Patient258C1 | Patient261C  |
| 21203 | Patient258C1 | Patient261E  |
| 21203 | Patient258C2 | Patient261C  |
| 21203 | Patient258C2 | Patient261E  |
| 21204 | Patient034B  | Patient233   |
| 21204 | Patient069   | Patient109B  |
| 21204 | Patient079A2 | Patient152A  |
| 21204 | Patient079C  | Patient152A  |
| 21204 | Patient089A2 | Patient195   |
| 21204 | Patient150A  | Patient233   |
| 21204 | Patient152A  | Patient184   |
| 21204 | Patient152A  | Patient187   |
| 21204 | Patient152A  | Patient196B  |
| 21204 | Patient152A  | Patient246C  |
| 21204 | Patient152B  | Patient201B  |
| 21204 | Patient152B  | Patient222A  |
| 21204 | Patient152B  | Patient222B  |
| 21204 | Patient180   | Patient220B  |
| 21204 | Patient196A  | Patient233   |
| 21204 | Patient202   | Patient233   |
| 21204 | Patient230E  | Patient233   |
| 21205 | Patient069   | Patient097D  |
| 21205 | Patient074D  | Patient089A1 |
| 21205 | Patient079B  | Patient152A  |
| 21205 | Patient088   | Patient195   |
| 21205 | Patient099A  | Patient152A  |
| 21205 | Patient108B1 | Patient233   |
| 21205 | Patient123A  | Patient233   |
| 21205 | Patient127A  | Patient152A  |
| 21205 | Patient127B  | Patient152A  |
| 21205 | Patient141D  | Patient258C1 |
| 21205 | Patient141D  | Patient258C2 |
| 21205 | Patient152A  | Patient196A  |
| 21205 | Patient152A  | Patient196C  |
| 21205 | Patient152A  | Patient222E  |
| 21205 | Patient152A  | Patient246B  |
| 21205 | Patient157   | Patient258C1 |
| 21205 | Patient157   | Patient258C2 |
| 21205 | Patient173B  | Patient233   |
| 21205 | Patient183B  | Patient233   |
| 21205 | Patient193   | Patient195   |
| 21205 | Patient206   | Patient215   |
| 21205 | Patient233   | Patient246D  |
| 21206 | Patient033   | Patient152A  |
| 21206 | Patient033   | Patient152B  |
| 21206 | Patient066E  | Patient233   |
| 21206 | Patient069   | Patient097A  |



|       |              |              |
|-------|--------------|--------------|
| 21206 | Patient069   | Patient097C  |
| 21206 | Patient069   | Patient108F  |
| 21206 | Patient069   | Patient108H  |
| 21206 | Patient097E  | Patient152B  |
| 21206 | Patient099C  | Patient233   |
| 21206 | Patient123B  | Patient233   |
| 21206 | Patient123C  | Patient233   |
| 21206 | Patient126D  | Patient180   |
| 21206 | Patient149B  | Patient152A  |
| 21206 | Patient150C  | Patient233   |
| 21206 | Patient152A  | Patient196E  |
| 21206 | Patient152A  | Patient232B  |
| 21206 | Patient152A  | Patient236A  |
| 21206 | Patient152B  | Patient263B  |
| 21206 | Patient196B  | Patient233   |
| 21206 | Patient196C  | Patient233   |
| 21207 | Patient021A2 | Patient058   |
| 21207 | Patient066F  | Patient233   |
| 21207 | Patient069   | Patient109E  |
| 21207 | Patient074D  | Patient171   |
| 21207 | Patient079A1 | Patient152B  |
| 21207 | Patient097C  | Patient193   |
| 21207 | Patient097D  | Patient193   |
| 21207 | Patient099D  | Patient233   |
| 21207 | Patient108A  | Patient233   |
| 21207 | Patient109A  | Patient233   |
| 21207 | Patient121A  | Patient152B  |
| 21207 | Patient123D  | Patient215   |
| 21207 | Patient152A  | Patient222D  |
| 21207 | Patient152A  | Patient265   |
| 21207 | Patient183C  | Patient215   |
| 21207 | Patient198   | Patient201E  |
| 21207 | Patient232A  | Patient233   |
| 21207 | Patient233   | Patient252A  |
| 21207 | Patient236B  | Patient258C1 |
| 21207 | Patient236B  | Patient258C2 |
| 21208 | Patient021A1 | Patient058   |
| 21208 | Patient069   | Patient109D  |
| 21208 | Patient097A  | Patient193   |
| 21208 | Patient099B  | Patient152A  |
| 21208 | Patient099C  | Patient152A  |
| 21208 | Patient108G  | Patient233   |
| 21208 | Patient109B  | Patient233   |
| 21208 | Patient109C  | Patient233   |
| 21208 | Patient145A  | Patient215   |
| 21208 | Patient152A  | Patient222F  |
| 21208 | Patient152A  | Patient252A  |
| 21208 | Patient152B  | Patient232B  |
| 21208 | Patient189C1 | Patient224B  |
| 21208 | Patient196E  | Patient233   |

|       |              |              |
|-------|--------------|--------------|
| 21208 | Patient198   | Patient232E  |
| 21208 | Patient201B  | Patient258C1 |
| 21208 | Patient201B  | Patient258C2 |
| 21208 | Patient232C  | Patient233   |
| 21208 | Patient232D  | Patient233   |
| 21208 | Patient233   | Patient242   |
| 21208 | Patient233   | Patient252F  |
| 21209 | Patient069   | Patient109C  |
| 21209 | Patient079A2 | Patient152B  |
| 21209 | Patient079C  | Patient152B  |
| 21209 | Patient103A  | Patient179   |
| 21209 | Patient121A  | Patient152A  |
| 21209 | Patient152B  | Patient184   |
| 21209 | Patient152B  | Patient187   |
| 21209 | Patient152B  | Patient196B  |
| 21209 | Patient152B  | Patient246C  |
| 21209 | Patient183B  | Patient258C1 |
| 21209 | Patient183B  | Patient258C2 |
| 21209 | Patient198   | Patient201A  |
| 21209 | Patient198   | Patient220A  |
| 21209 | Patient198   | Patient232A  |
| 21209 | Patient198   | Patient252D  |
| 21209 | Patient222A  | Patient258C1 |
| 21209 | Patient222A  | Patient258C2 |
| 21209 | Patient233   | Patient252B  |
| 21209 | Patient247D  | Patient258C1 |
| 21209 | Patient247D  | Patient258C2 |
| 21209 | Patient258C1 | Patient261A  |
| 21209 | Patient258C2 | Patient261A  |
| 21210 | Patient026F  | Patient233   |
| 21210 | Patient069   | Patient097B  |
| 21210 | Patient079B  | Patient152B  |
| 21210 | Patient099A  | Patient152B  |
| 21210 | Patient108A  | Patient152A  |
| 21210 | Patient109A  | Patient152A  |
| 21210 | Patient127A  | Patient152B  |
| 21210 | Patient127B  | Patient152B  |
| 21210 | Patient152B  | Patient196A  |
| 21210 | Patient152B  | Patient196C  |
| 21210 | Patient152B  | Patient222E  |
| 21210 | Patient152B  | Patient246B  |
| 21210 | Patient198   | Patient201B  |
| 21210 | Patient198   | Patient222A  |
| 21210 | Patient204   | Patient208   |
| 21210 | Patient252D  | Patient258C1 |
| 21210 | Patient252D  | Patient258C2 |
| 21210 | Patient258C1 | Patient261D  |
| 21210 | Patient258C2 | Patient261D  |
| 21211 | Patient108B1 | Patient152A  |
| 21211 | Patient108B2 | Patient152A  |

|       |              |              |
|-------|--------------|--------------|
| 21211 | Patient108D  | Patient152A  |
| 21211 | Patient131   | Patient233   |
| 21211 | Patient149B  | Patient152B  |
| 21211 | Patient152A  | Patient246D  |
| 21211 | Patient152B  | Patient196E  |
| 21211 | Patient152B  | Patient220B  |
| 21211 | Patient152B  | Patient236A  |
| 21211 | Patient183A  | Patient215   |
| 21211 | Patient198   | Patient206   |
| 21211 | Patient198   | Patient222B  |
| 21211 | Patient198   | Patient232C  |
| 21211 | Patient201E  | Patient258C1 |
| 21211 | Patient201E  | Patient258C2 |
| 21211 | Patient218A  | Patient233   |
| 21212 | Patient074B  | Patient089A1 |
| 21212 | Patient141G  | Patient208   |
| 21212 | Patient150B  | Patient233   |
| 21212 | Patient152A  | Patient220B  |
| 21212 | Patient152A  | Patient252F  |
| 21212 | Patient152B  | Patient222D  |
| 21212 | Patient152B  | Patient265   |
| 21212 | Patient184   | Patient198   |
| 21212 | Patient198   | Patient263B  |
| 21212 | Patient201A  | Patient258C1 |
| 21212 | Patient201A  | Patient258C2 |
| 21212 | Patient215   | Patient217A  |
| 21213 | Patient074A  | Patient089A1 |
| 21213 | Patient074B  | Patient171   |
| 21213 | Patient074C  | Patient089A1 |
| 21213 | Patient099B  | Patient152B  |
| 21213 | Patient099C  | Patient152B  |
| 21213 | Patient099D  | Patient152A  |
| 21213 | Patient108F  | Patient233   |
| 21213 | Patient108H  | Patient233   |
| 21213 | Patient109D  | Patient233   |
| 21213 | Patient109E  | Patient233   |
| 21213 | Patient123D  | Patient233   |
| 21213 | Patient145C  | Patient233   |
| 21213 | Patient152A  | Patient232E  |
| 21213 | Patient152A  | Patient252B  |
| 21213 | Patient152B  | Patient222F  |
| 21213 | Patient152B  | Patient252A  |
| 21213 | Patient183E  | Patient233   |
| 21213 | Patient233   | Patient246E  |
| 21213 | Patient258C1 | Patient261B  |
| 21213 | Patient258C2 | Patient261B  |
| 21214 | Patient032B  | Patient258C1 |
| 21214 | Patient032B  | Patient258C2 |
| 21214 | Patient069   | Patient079A1 |
| 21214 | Patient074A  | Patient171   |

|       |              |              |
|-------|--------------|--------------|
| 21214 | Patient074C  | Patient171   |
| 21214 | Patient097B  | Patient193   |
| 21214 | Patient108G  | Patient152A  |
| 21214 | Patient109C  | Patient152A  |
| 21214 | Patient121A  | Patient258C1 |
| 21214 | Patient121A  | Patient258C2 |
| 21214 | Patient152A  | Patient232A  |
| 21214 | Patient198   | Patient232D  |
| 21214 | Patient220B  | Patient233   |
| 21215 | Patient021A2 | Patient029   |
| 21215 | Patient069   | Patient079B  |
| 21215 | Patient081C  | Patient208   |
| 21215 | Patient097E  | Patient193   |
| 21215 | Patient108A  | Patient152B  |
| 21215 | Patient109A  | Patient152B  |
| 21215 | Patient145A  | Patient233   |
| 21215 | Patient149B  | Patient198   |
| 21215 | Patient152B  | Patient261G  |
| 21215 | Patient187   | Patient198   |
| 21215 | Patient196B  | Patient198   |
| 21215 | Patient198   | Patient246C  |
| 21215 | Patient208   | Patient230C  |
| 21215 | Patient218B  | Patient233   |
| 21215 | Patient247B  | Patient258C1 |
| 21215 | Patient247B  | Patient258C2 |
| 21216 | Patient069   | Patient079C  |
| 21216 | Patient069   | Patient097E  |
| 21216 | Patient099A  | Patient198   |
| 21216 | Patient108B1 | Patient152B  |
| 21216 | Patient108B2 | Patient152B  |
| 21216 | Patient108D  | Patient152B  |
| 21216 | Patient127A  | Patient198   |
| 21216 | Patient127B  | Patient198   |
| 21216 | Patient152A  | Patient232C  |
| 21216 | Patient152A  | Patient246E  |
| 21216 | Patient152B  | Patient217A  |
| 21216 | Patient152B  | Patient232E  |
| 21216 | Patient152B  | Patient246D  |
| 21216 | Patient196A  | Patient198   |
| 21216 | Patient196C  | Patient198   |
| 21216 | Patient198   | Patient222E  |
| 21216 | Patient198   | Patient246B  |
| 21216 | Patient222B  | Patient258C1 |
| 21216 | Patient222B  | Patient258C2 |
| 21216 | Patient247A  | Patient258C1 |
| 21216 | Patient247A  | Patient258C2 |
| 21216 | Patient247C  | Patient258C1 |
| 21216 | Patient247C  | Patient258C2 |
| 21216 | Patient258C1 | Patient263B  |
| 21216 | Patient258C2 | Patient263B  |

|       |              |              |
|-------|--------------|--------------|
| 21217 | Patient026A  | Patient233   |
| 21217 | Patient152A  | Patient261G  |
| 21217 | Patient152B  | Patient232A  |
| 21217 | Patient152B  | Patient252F  |
| 21217 | Patient196E  | Patient198   |
| 21217 | Patient198   | Patient205   |
| 21217 | Patient198   | Patient236A  |
| 21217 | Patient204   | Patient233   |
| 21217 | Patient215   | Patient217C  |
| 21218 | Patient026B  | Patient233   |
| 21218 | Patient032A  | Patient258C1 |
| 21218 | Patient032A  | Patient258C2 |
| 21218 | Patient033   | Patient233   |
| 21218 | Patient069   | Patient079A2 |
| 21218 | Patient099A  | Patient258C1 |
| 21218 | Patient099A  | Patient258C2 |
| 21218 | Patient099D  | Patient152B  |
| 21218 | Patient108F  | Patient152A  |
| 21218 | Patient108H  | Patient152A  |
| 21218 | Patient109B  | Patient152A  |
| 21218 | Patient127B  | Patient258C1 |
| 21218 | Patient127B  | Patient258C2 |
| 21218 | Patient141F  | Patient208   |
| 21218 | Patient152A  | Patient217A  |
| 21218 | Patient152B  | Patient252B  |
| 21218 | Patient183C  | Patient233   |
| 21218 | Patient198   | Patient222D  |
| 21218 | Patient198   | Patient265   |
| 21218 | Patient215   | Patient217E  |
| 21219 | Patient021A1 | Patient029   |
| 21219 | Patient034A  | Patient258C1 |
| 21219 | Patient034A  | Patient258C2 |
| 21219 | Patient099B  | Patient198   |
| 21219 | Patient099C  | Patient198   |
| 21219 | Patient108G  | Patient152B  |
| 21219 | Patient109C  | Patient152B  |
| 21219 | Patient121B  | Patient152B  |
| 21219 | Patient126A  | Patient189C2 |
| 21219 | Patient152A  | Patient232D  |
| 21219 | Patient152B  | Patient232C  |
| 21219 | Patient179   | Patient258E  |
| 21219 | Patient183E  | Patient258C1 |
| 21219 | Patient183E  | Patient258C2 |
| 21219 | Patient198   | Patient222F  |
| 21219 | Patient215   | Patient217B  |
| 21219 | Patient215   | Patient217D  |
| 21219 | Patient215   | Patient217F  |
| 21219 | Patient215   | Patient217H  |
| 21219 | Patient215   | Patient217I  |
| 21219 | Patient220A  | Patient258C1 |

|       |             |              |
|-------|-------------|--------------|
| 21219 | Patient220A | Patient258C2 |
| 21219 | Patient236A | Patient258C1 |
| 21219 | Patient236A | Patient258C2 |
| 21219 | Patient247E | Patient258C1 |
| 21219 | Patient247E | Patient258C2 |
| 21220 | Patient074E | Patient089A1 |
| 21220 | Patient092G | Patient198   |
| 21220 | Patient109E | Patient152A  |
| 21220 | Patient131  | Patient152A  |
| 21220 | Patient149B | Patient258C1 |
| 21220 | Patient149B | Patient258C2 |
| 21220 | Patient152A | Patient159   |
| 21220 | Patient198  | Patient261G  |
| 21220 | Patient222E | Patient258C1 |
| 21220 | Patient222E | Patient258C2 |
| 21220 | Patient246A | Patient258C1 |
| 21220 | Patient246A | Patient258C2 |
| 21221 | Patient074E | Patient171   |
| 21221 | Patient109D | Patient152A  |
| 21221 | Patient121B | Patient152A  |
| 21221 | Patient121B | Patient258C1 |
| 21221 | Patient121B | Patient258C2 |
| 21221 | Patient152B | Patient217E  |
| 21221 | Patient152B | Patient217H  |
| 21221 | Patient152B | Patient246E  |
| 21221 | Patient159  | Patient258C1 |
| 21221 | Patient159  | Patient258C2 |
| 21221 | Patient183A | Patient233   |
| 21221 | Patient208  | Patient230G  |
| 21221 | Patient222D | Patient258C1 |
| 21221 | Patient222D | Patient258C2 |
| 21222 | Patient081D | Patient208   |
| 21222 | Patient127A | Patient258C1 |
| 21222 | Patient127A | Patient258C2 |
| 21222 | Patient152A | Patient218A  |
| 21222 | Patient152B | Patient217B  |
| 21222 | Patient152B | Patient217D  |
| 21222 | Patient152B | Patient217I  |
| 21222 | Patient152B | Patient232D  |
| 21222 | Patient198  | Patient246D  |
| 21223 | Patient034E | Patient258C1 |
| 21223 | Patient034E | Patient258C2 |
| 21223 | Patient058  | Patient074D  |
| 21223 | Patient099B | Patient258C1 |
| 21223 | Patient099B | Patient258C2 |
| 21223 | Patient108F | Patient152B  |
| 21223 | Patient108H | Patient152B  |
| 21223 | Patient109B | Patient152B  |
| 21223 | Patient133  | Patient208   |
| 21223 | Patient152A | Patient217E  |

|       |              |              |
|-------|--------------|--------------|
| 21223 | Patient152A  | Patient217H  |
| 21223 | Patient152B  | Patient217C  |
| 21223 | Patient152B  | Patient217F  |
| 21223 | Patient184   | Patient258C1 |
| 21223 | Patient184   | Patient258C2 |
| 21223 | Patient187   | Patient258C1 |
| 21223 | Patient187   | Patient258C2 |
| 21223 | Patient258C1 | Patient265   |
| 21223 | Patient258C2 | Patient265   |
| 21224 | Patient074D  | Patient114   |
| 21224 | Patient099D  | Patient198   |
| 21224 | Patient108A  | Patient171   |
| 21224 | Patient126A  | Patient189C1 |
| 21224 | Patient152A  | Patient205   |
| 21224 | Patient152A  | Patient217B  |
| 21224 | Patient152A  | Patient217D  |
| 21224 | Patient152A  | Patient217I  |
| 21224 | Patient152A  | Patient218B  |
| 21224 | Patient183C  | Patient258C1 |
| 21224 | Patient183C  | Patient258C2 |
| 21224 | Patient196A  | Patient258C1 |
| 21224 | Patient196A  | Patient258C2 |
| 21224 | Patient215   | Patient217J  |
| 21224 | Patient222F  | Patient258C1 |
| 21224 | Patient222F  | Patient258C2 |
| 21225 | Patient034C  | Patient258C1 |
| 21225 | Patient034C  | Patient258C2 |
| 21225 | Patient092G  | Patient258C1 |
| 21225 | Patient092G  | Patient258C2 |
| 21225 | Patient109E  | Patient152B  |
| 21225 | Patient123A  | Patient258C1 |
| 21225 | Patient123A  | Patient258C2 |
| 21225 | Patient131   | Patient152B  |
| 21225 | Patient152A  | Patient217C  |
| 21225 | Patient152A  | Patient217F  |
| 21225 | Patient152B  | Patient159   |
| 21225 | Patient152B  | Patient218A  |
| 21225 | Patient180   | Patient258E  |
| 21226 | Patient032E  | Patient208   |
| 21226 | Patient053C  | Patient258C1 |
| 21226 | Patient053C  | Patient258C2 |
| 21226 | Patient099C  | Patient258C1 |
| 21226 | Patient099C  | Patient258C2 |
| 21226 | Patient109D  | Patient152B  |
| 21226 | Patient123B  | Patient258C1 |
| 21226 | Patient123B  | Patient258C2 |
| 21226 | Patient123C  | Patient258C1 |
| 21226 | Patient123C  | Patient258C2 |
| 21226 | Patient126C  | Patient233   |
| 21226 | Patient196B  | Patient258C1 |

|       |              |              |
|-------|--------------|--------------|
| 21226 | Patient196B  | Patient258C2 |
| 21226 | Patient196C  | Patient258C1 |
| 21226 | Patient196C  | Patient258C2 |
| 21227 | Patient034B  | Patient258C1 |
| 21227 | Patient034B  | Patient258C2 |
| 21227 | Patient034D  | Patient258C1 |
| 21227 | Patient034D  | Patient258C2 |
| 21227 | Patient081C  | Patient152B  |
| 21227 | Patient093D  | Patient208   |
| 21227 | Patient099D  | Patient258C1 |
| 21227 | Patient099D  | Patient258C2 |
| 21227 | Patient108D  | Patient171   |
| 21227 | Patient152B  | Patient218B  |
| 21227 | Patient198   | Patient246E  |
| 21228 | Patient026D  | Patient208   |
| 21228 | Patient053A2 | Patient258C1 |
| 21228 | Patient053A2 | Patient258C2 |
| 21228 | Patient053B  | Patient258C1 |
| 21228 | Patient053B  | Patient258C2 |
| 21228 | Patient074D  | Patient088   |
| 21228 | Patient074D  | Patient089A2 |
| 21228 | Patient152B  | Patient217J  |
| 21228 | Patient179   | Patient235A  |
| 21228 | Patient183A  | Patient258C1 |
| 21228 | Patient183A  | Patient258C2 |
| 21228 | Patient196D  | Patient233   |
| 21228 | Patient196E  | Patient258C1 |
| 21228 | Patient196E  | Patient258C2 |
| 21229 | Patient032C  | Patient208   |
| 21229 | Patient055   | Patient215   |
| 21229 | Patient081C  | Patient152A  |
| 21229 | Patient092H  | Patient258C1 |
| 21229 | Patient092H  | Patient258C2 |
| 21229 | Patient093A  | Patient208   |
| 21229 | Patient152B  | Patient205   |
| 21230 | Patient026E  | Patient208   |
| 21230 | Patient058   | Patient074B  |
| 21230 | Patient109A  | Patient171   |
| 21230 | Patient152A  | Patient217J  |
| 21230 | Patient159   | Patient198   |
| 21230 | Patient218A  | Patient258C1 |
| 21230 | Patient218A  | Patient258C2 |
| 21230 | Patient246C  | Patient258C1 |
| 21230 | Patient246C  | Patient258C2 |
| 21231 | Patient026D  | Patient215   |
| 21231 | Patient058   | Patient074A  |
| 21231 | Patient058   | Patient074C  |
| 21231 | Patient074B  | Patient114   |
| 21231 | Patient081E  | Patient152B  |
| 21231 | Patient092A  | Patient233   |



|       |             |              |
|-------|-------------|--------------|
| 21231 | Patient167  | Patient208   |
| 21231 | Patient246B | Patient258C1 |
| 21231 | Patient246B | Patient258C2 |
| 21232 | Patient026E | Patient215   |
| 21232 | Patient069  | Patient120C  |
| 21232 | Patient074A | Patient114   |
| 21232 | Patient074C | Patient114   |
| 21232 | Patient074D | Patient193   |
| 21232 | Patient081F | Patient152B  |
| 21232 | Patient092A | Patient215   |
| 21232 | Patient145C | Patient258C2 |
| 21232 | Patient180  | Patient235A  |
| 21232 | Patient192C | Patient233   |
| 21233 | Patient069  | Patient120D  |
| 21233 | Patient081E | Patient152A  |
| 21233 | Patient103D | Patient180   |
| 21233 | Patient108G | Patient171   |
| 21233 | Patient145C | Patient258C1 |
| 21233 | Patient198  | Patient218A  |
| 21233 | Patient246D | Patient258C1 |
| 21233 | Patient246D | Patient258C2 |
| 21234 | Patient081B | Patient152B  |
| 21234 | Patient081F | Patient152A  |
| 21234 | Patient123D | Patient258C1 |
| 21234 | Patient123D | Patient258C2 |
| 21234 | Patient141G | Patient152B  |
| 21234 | Patient145A | Patient258C2 |
| 21234 | Patient152A | Patient196D  |
| 21234 | Patient179  | Patient192D  |
| 21234 | Patient218B | Patient258C1 |
| 21234 | Patient218B | Patient258C2 |
| 21235 | Patient069  | Patient120B  |
| 21235 | Patient074B | Patient088   |
| 21235 | Patient074B | Patient089A2 |
| 21235 | Patient090  | Patient208   |
| 21235 | Patient092E | Patient233   |
| 21235 | Patient109B | Patient171   |
| 21235 | Patient145A | Patient258C1 |
| 21235 | Patient198  | Patient218B  |
| 21236 | Patient074A | Patient088   |
| 21236 | Patient074A | Patient089A2 |
| 21236 | Patient074C | Patient088   |
| 21236 | Patient074C | Patient089A2 |
| 21236 | Patient081B | Patient152A  |
| 21236 | Patient092B | Patient233   |
| 21236 | Patient092E | Patient215   |
| 21236 | Patient094C | Patient208   |
| 21236 | Patient103E | Patient180   |
| 21236 | Patient141G | Patient152A  |
| 21236 | Patient152B | Patient230C  |

|       |              |              |
|-------|--------------|--------------|
| 21236 | Patient173A  | Patient189C2 |
| 21236 | Patient183D  | Patient208   |
| 21236 | Patient192A  | Patient233   |
| 21237 | Patient022B  | Patient215   |
| 21237 | Patient074E  | Patient114   |
| 21237 | Patient081A2 | Patient152B  |
| 21237 | Patient081D  | Patient152B  |
| 21237 | Patient092B  | Patient215   |
| 21237 | Patient093E  | Patient208   |
| 21237 | Patient097D  | Patient171   |
| 21238 | Patient058   | Patient074E  |
| 21238 | Patient081A1 | Patient152B  |
| 21238 | Patient094B  | Patient208   |
| 21238 | Patient108H  | Patient171   |
| 21238 | Patient152A  | Patient230C  |
| 21238 | Patient176   | Patient215   |
| 21239 | Patient023   | Patient069   |
| 21239 | Patient058   | Patient195   |
| 21239 | Patient074B  | Patient193   |
| 21239 | Patient081A2 | Patient152A  |
| 21239 | Patient081D  | Patient152A  |
| 21239 | Patient097A  | Patient171   |
| 21239 | Patient141G  | Patient198   |
| 21239 | Patient152B  | Patient196D  |
| 21239 | Patient180   | Patient192D  |
| 21240 | Patient069   | Patient195   |
| 21240 | Patient074A  | Patient193   |
| 21240 | Patient074C  | Patient193   |
| 21240 | Patient081A1 | Patient152A  |
| 21240 | Patient097C  | Patient171   |
| 21240 | Patient103D  | Patient179   |
| 21240 | Patient108F  | Patient171   |
| 21240 | Patient109D  | Patient171   |
| 21241 | Patient094A  | Patient208   |
| 21241 | Patient109E  | Patient171   |
| 21241 | Patient141F  | Patient152B  |
| 21241 | Patient145B  | Patient208   |
| 21241 | Patient173A  | Patient189C1 |
| 21241 | Patient192C  | Patient215   |
| 21241 | Patient198   | Patient230C  |
| 21241 | Patient246E  | Patient258C1 |
| 21241 | Patient246E  | Patient258C2 |
| 21242 | Patient192F  | Patient233   |
| 21242 | Patient202   | Patient258C1 |
| 21242 | Patient202   | Patient258C2 |
| 21242 | Patient208   | Patient261C  |
| 21242 | Patient208   | Patient261E  |
| 21242 | Patient233   | Patient235E  |
| 21243 | Patient074E  | Patient088   |
| 21243 | Patient074E  | Patient089A2 |

|       |              |              |
|-------|--------------|--------------|
| 21243 | Patient079A1 | Patient215   |
| 21243 | Patient103E  | Patient179   |
| 21243 | Patient141F  | Patient152A  |
| 21243 | Patient152B  | Patient230G  |
| 21243 | Patient183B  | Patient208   |
| 21243 | Patient196D  | Patient198   |
| 21243 | Patient233   | Patient235F  |
| 21244 | Patient026D  | Patient152B  |
| 21244 | Patient045C  | Patient208   |
| 21244 | Patient079A2 | Patient215   |
| 21244 | Patient079B  | Patient215   |
| 21244 | Patient079C  | Patient215   |
| 21244 | Patient097B  | Patient171   |
| 21244 | Patient109C  | Patient171   |
| 21244 | Patient176   | Patient208   |
| 21245 | Patient022B  | Patient258C1 |
| 21245 | Patient022B  | Patient258C2 |
| 21245 | Patient026E  | Patient152B  |
| 21245 | Patient045A  | Patient208   |
| 21245 | Patient054   | Patient208   |
| 21245 | Patient141D  | Patient152B  |
| 21245 | Patient152A  | Patient230G  |
| 21245 | Patient192B  | Patient233   |
| 21245 | Patient215   | Patient241   |
| 21246 | Patient026D  | Patient152A  |
| 21246 | Patient038   | Patient208   |
| 21246 | Patient141B  | Patient152B  |
| 21246 | Patient141F  | Patient198   |
| 21246 | Patient205   | Patient208   |
| 21247 | Patient026E  | Patient152A  |
| 21247 | Patient074E  | Patient193   |
| 21247 | Patient097E  | Patient171   |
| 21247 | Patient141A  | Patient152B  |
| 21247 | Patient141D  | Patient152A  |
| 21247 | Patient192A  | Patient215   |
| 21248 | Patient045B  | Patient208   |
| 21248 | Patient141B  | Patient152A  |
| 21248 | Patient141C  | Patient152B  |
| 21248 | Patient152B  | Patient230A  |
| 21248 | Patient196D  | Patient258C1 |
| 21248 | Patient196D  | Patient258C2 |
| 21248 | Patient198   | Patient230G  |
| 21248 | Patient207   | Patient208   |
| 21249 | Patient032B  | Patient152B  |
| 21249 | Patient141A  | Patient152A  |
| 21249 | Patient161B  | Patient208   |
| 21249 | Patient189C2 | Patient195   |
| 21249 | Patient215   | Patient230A  |
| 21250 | Patient141C  | Patient152A  |
| 21250 | Patient152A  | Patient230A  |

|       |              |              |
|-------|--------------|--------------|
| 21251 | Patient032B  | Patient152A  |
| 21251 | Patient053C  | Patient152B  |
| 21251 | Patient141B  | Patient215   |
| 21251 | Patient183E  | Patient208   |
| 21251 | Patient233   | Patient235C  |
| 21252 | Patient023   | Patient152A  |
| 21252 | Patient032A  | Patient152B  |
| 21252 | Patient032E  | Patient152B  |
| 21252 | Patient034A  | Patient152B  |
| 21252 | Patient045C  | Patient215   |
| 21252 | Patient093C  | Patient208   |
| 21252 | Patient141A  | Patient215   |
| 21252 | Patient141C  | Patient215   |
| 21252 | Patient192E  | Patient233   |
| 21252 | Patient205   | Patient233   |
| 21253 | Patient053A2 | Patient152B  |
| 21253 | Patient053B  | Patient152B  |
| 21253 | Patient053C  | Patient152A  |
| 21253 | Patient208   | Patient230D  |
| 21253 | Patient215   | Patient220B  |
| 21254 | Patient032A  | Patient152A  |
| 21254 | Patient032E  | Patient152A  |
| 21254 | Patient034A  | Patient152A  |
| 21254 | Patient045A  | Patient215   |
| 21254 | Patient176   | Patient258C1 |
| 21254 | Patient176   | Patient258C2 |
| 21254 | Patient189C1 | Patient195   |
| 21254 | Patient192F  | Patient215   |
| 21254 | Patient233   | Patient235B  |
| 21255 | Patient023   | Patient152B  |
| 21255 | Patient032C  | Patient152B  |
| 21255 | Patient053A2 | Patient152A  |
| 21255 | Patient053B  | Patient152A  |
| 21255 | Patient192B  | Patient215   |
| 21256 | Patient034E  | Patient152B  |
| 21256 | Patient081C  | Patient215   |
| 21256 | Patient103B  | Patient189C2 |
| 21256 | Patient103C  | Patient189C2 |
| 21256 | Patient183C  | Patient208   |
| 21257 | Patient026C  | Patient179   |
| 21257 | Patient026F  | Patient215   |
| 21257 | Patient032C  | Patient152A  |
| 21257 | Patient045B  | Patient215   |
| 21257 | Patient081B  | Patient180   |
| 21257 | Patient092A  | Patient258C1 |
| 21257 | Patient092A  | Patient258C2 |
| 21257 | Patient150A  | Patient208   |
| 21257 | Patient235E  | Patient258C1 |
| 21257 | Patient235E  | Patient258C2 |
| 21257 | Patient235F  | Patient258C2 |

|       |              |              |
|-------|--------------|--------------|
| 21258 | Patient021A2 | Patient179   |
| 21258 | Patient032E  | Patient198   |
| 21258 | Patient034E  | Patient152A  |
| 21258 | Patient152B  | Patient183D  |
| 21258 | Patient164   | Patient208   |
| 21258 | Patient235F  | Patient258C1 |
| 21259 | Patient021A1 | Patient179   |
| 21259 | Patient045C  | Patient152B  |
| 21259 | Patient081E  | Patient180   |
| 21259 | Patient150C  | Patient208   |
| 21259 | Patient152B  | Patient230D  |
| 21259 | Patient183A  | Patient208   |
| 21260 | Patient034C  | Patient152B  |
| 21260 | Patient034D  | Patient152B  |
| 21260 | Patient045A  | Patient152B  |
| 21260 | Patient055   | Patient208   |
| 21260 | Patient152A  | Patient183D  |
| 21260 | Patient189C2 | Patient224A  |
| 21261 | Patient032C  | Patient198   |
| 21261 | Patient045C  | Patient152A  |
| 21261 | Patient092E  | Patient258C1 |
| 21261 | Patient092E  | Patient258C2 |
| 21261 | Patient103C  | Patient189C1 |
| 21261 | Patient152A  | Patient230D  |
| 21261 | Patient152B  | Patient235A  |
| 21261 | Patient152B  | Patient261D  |
| 21261 | Patient215   | Patient242   |
| 21262 | Patient029   | Patient246A  |
| 21262 | Patient034C  | Patient152A  |
| 21262 | Patient034D  | Patient152A  |
| 21262 | Patient045A  | Patient152A  |
| 21262 | Patient066D  | Patient152B  |
| 21262 | Patient081B  | Patient179   |
| 21262 | Patient092B  | Patient258C1 |
| 21262 | Patient092B  | Patient258C2 |
| 21262 | Patient103B  | Patient189C1 |
| 21262 | Patient145B  | Patient152B  |
| 21262 | Patient152B  | Patient230F  |
| 21262 | Patient152B  | Patient261A  |
| 21262 | Patient179   | Patient217A  |
| 21263 | Patient026C  | Patient180   |
| 21263 | Patient045B  | Patient152B  |
| 21263 | Patient081A2 | Patient180   |
| 21263 | Patient152A  | Patient235A  |
| 21263 | Patient152A  | Patient261D  |
| 21263 | Patient152B  | Patient161B  |
| 21263 | Patient180   | Patient217A  |
| 21263 | Patient183D  | Patient198   |
| 21263 | Patient215   | Patient230B  |
| 21264 | Patient026A  | Patient215   |

|       |              |             |
|-------|--------------|-------------|
| 21264 | Patient034B  | Patient152B |
| 21264 | Patient066D  | Patient152A |
| 21264 | Patient081E  | Patient179  |
| 21264 | Patient081E  | Patient215  |
| 21264 | Patient081F  | Patient180  |
| 21264 | Patient081F  | Patient215  |
| 21264 | Patient108B2 | Patient215  |
| 21264 | Patient141D  | Patient198  |
| 21264 | Patient145B  | Patient152A |
| 21264 | Patient152A  | Patient230F |
| 21264 | Patient152A  | Patient261A |
| 21264 | Patient152B  | Patient230B |
| 21264 | Patient152B  | Patient230E |
| 21264 | Patient152B  | Patient261C |
| 21264 | Patient152B  | Patient261E |
| 21264 | Patient215   | Patient230F |
| 21265 | Patient045B  | Patient152A |
| 21265 | Patient150B  | Patient208  |
| 21265 | Patient152A  | Patient161B |
| 21265 | Patient152B  | Patient173B |
| 21265 | Patient176   | Patient233  |
| 21265 | Patient189C1 | Patient224A |
| 21265 | Patient192E  | Patient215  |
| 21265 | Patient215   | Patient230D |
| 21265 | Patient215   | Patient230E |
| 21266 | Patient026B  | Patient215  |
| 21266 | Patient034B  | Patient152A |
| 21266 | Patient081B  | Patient215  |
| 21266 | Patient152A  | Patient230B |
| 21266 | Patient152A  | Patient230E |
| 21266 | Patient152A  | Patient261C |
| 21266 | Patient152A  | Patient261E |
| 21266 | Patient152B  | Patient183B |
| 21266 | Patient152B  | Patient261B |
| 21267 | Patient066E  | Patient152B |
| 21267 | Patient081A1 | Patient180  |
| 21267 | Patient081A2 | Patient179  |
| 21267 | Patient108B1 | Patient215  |
| 21267 | Patient152A  | Patient173B |
| 21268 | Patient007A  | Patient152A |
| 21268 | Patient007A  | Patient152B |
| 21268 | Patient081D  | Patient215  |
| 21268 | Patient093B  | Patient208  |
| 21268 | Patient123A  | Patient152B |
| 21268 | Patient123B  | Patient152B |
| 21268 | Patient123C  | Patient152B |
| 21268 | Patient145B  | Patient198  |
| 21268 | Patient152A  | Patient183B |
| 21268 | Patient152A  | Patient261B |
| 21268 | Patient179   | Patient217B |

|       |              |             |
|-------|--------------|-------------|
| 21268 | Patient179   | Patient217I |
| 21269 | Patient007B  | Patient152A |
| 21269 | Patient007B  | Patient152B |
| 21269 | Patient053C  | Patient198  |
| 21269 | Patient066E  | Patient152A |
| 21269 | Patient066F  | Patient152B |
| 21269 | Patient081A2 | Patient215  |
| 21269 | Patient081F  | Patient179  |
| 21269 | Patient097A  | Patient215  |
| 21269 | Patient179   | Patient217H |
| 21269 | Patient180   | Patient217B |
| 21269 | Patient180   | Patient217I |
| 21270 | Patient032B  | Patient198  |
| 21270 | Patient069   | Patient074D |
| 21270 | Patient081A1 | Patient215  |
| 21270 | Patient092H  | Patient152B |
| 21270 | Patient123A  | Patient152A |
| 21270 | Patient123B  | Patient152A |
| 21270 | Patient123C  | Patient152A |
| 21270 | Patient150A  | Patient152B |
| 21270 | Patient161B  | Patient215  |
| 21270 | Patient179   | Patient217C |
| 21270 | Patient179   | Patient217D |
| 21270 | Patient179   | Patient217F |
| 21270 | Patient180   | Patient217H |
| 21270 | Patient198   | Patient261C |
| 21270 | Patient198   | Patient261E |
| 21271 | Patient033   | Patient208  |
| 21271 | Patient053A2 | Patient198  |
| 21271 | Patient053B  | Patient198  |
| 21271 | Patient066F  | Patient152A |
| 21271 | Patient108D  | Patient215  |
| 21271 | Patient152B  | Patient176  |
| 21271 | Patient180   | Patient217C |
| 21271 | Patient180   | Patient217D |
| 21271 | Patient180   | Patient217F |
| 21271 | Patient183B  | Patient198  |
| 21271 | Patient208   | Patient220B |
| 21271 | Patient258C1 | Patient258F |
| 21271 | Patient258C2 | Patient258F |
| 21272 | Patient055   | Patient152B |
| 21272 | Patient081A1 | Patient179  |
| 21272 | Patient092H  | Patient152A |
| 21272 | Patient150A  | Patient152A |
| 21272 | Patient150C  | Patient152B |
| 21273 | Patient026F  | Patient152B |
| 21273 | Patient032A  | Patient198  |
| 21273 | Patient066D  | Patient215  |
| 21273 | Patient145C  | Patient152B |
| 21273 | Patient152A  | Patient176  |

|       |              |              |
|-------|--------------|--------------|
| 21273 | Patient179   | Patient217E  |
| 21274 | Patient126C  | Patient215   |
| 21274 | Patient150C  | Patient152A  |
| 21274 | Patient180   | Patient217E  |
| 21274 | Patient208   | Patient258E  |
| 21275 | Patient026A  | Patient152B  |
| 21275 | Patient026B  | Patient152B  |
| 21275 | Patient026F  | Patient152A  |
| 21275 | Patient034A  | Patient198   |
| 21275 | Patient055   | Patient152A  |
| 21275 | Patient097D  | Patient215   |
| 21275 | Patient108A  | Patient215   |
| 21275 | Patient123D  | Patient152B  |
| 21275 | Patient145A  | Patient152B  |
| 21275 | Patient145C  | Patient152A  |
| 21275 | Patient176   | Patient198   |
| 21275 | Patient258B  | Patient258C1 |
| 21275 | Patient258B  | Patient258C2 |
| 21276 | Patient023   | Patient233   |
| 21276 | Patient094D  | Patient208   |
| 21276 | Patient094E  | Patient208   |
| 21276 | Patient108G  | Patient215   |
| 21276 | Patient109A  | Patient215   |
| 21276 | Patient109C  | Patient215   |
| 21276 | Patient152B  | Patient183E  |
| 21276 | Patient179   | Patient252B  |
| 21276 | Patient192C  | Patient258C1 |
| 21276 | Patient192C  | Patient258C2 |
| 21276 | Patient258A1 | Patient258C1 |
| 21276 | Patient258A1 | Patient258C2 |
| 21276 | Patient258A2 | Patient258C1 |
| 21276 | Patient258A2 | Patient258C2 |
| 21276 | Patient258C1 | Patient258G  |
| 21276 | Patient258C2 | Patient258G  |
| 21277 | Patient022B  | Patient233   |
| 21277 | Patient026A  | Patient152A  |
| 21277 | Patient026B  | Patient152A  |
| 21277 | Patient069   | Patient074B  |
| 21277 | Patient123D  | Patient152A  |
| 21277 | Patient145A  | Patient152A  |
| 21278 | Patient066E  | Patient215   |
| 21278 | Patient069   | Patient074A  |
| 21278 | Patient069   | Patient074C  |
| 21278 | Patient097B  | Patient215   |
| 21278 | Patient109B  | Patient215   |
| 21278 | Patient109E  | Patient215   |
| 21278 | Patient150B  | Patient152B  |
| 21278 | Patient152A  | Patient183E  |
| 21278 | Patient198   | Patient261A  |
| 21279 | Patient034E  | Patient198   |



|       |              |              |
|-------|--------------|--------------|
| 21279 | Patient055   | Patient198   |
| 21279 | Patient066F  | Patient215   |
| 21279 | Patient097C  | Patient215   |
| 21279 | Patient108F  | Patient215   |
| 21279 | Patient179   | Patient217J  |
| 21279 | Patient198   | Patient261D  |
| 21280 | Patient021A2 | Patient180   |
| 21280 | Patient108H  | Patient215   |
| 21280 | Patient109D  | Patient215   |
| 21280 | Patient150B  | Patient152A  |
| 21280 | Patient152B  | Patient183C  |
| 21280 | Patient180   | Patient217J  |
| 21280 | Patient192A  | Patient258C1 |
| 21280 | Patient192A  | Patient258C2 |
| 21280 | Patient258C1 | Patient258D  |
| 21280 | Patient258C2 | Patient258D  |
| 21281 | Patient021A1 | Patient180   |
| 21281 | Patient183E  | Patient198   |
| 21282 | Patient152A  | Patient183C  |
| 21282 | Patient198   | Patient261B  |
| 21283 | Patient034C  | Patient198   |
| 21283 | Patient034D  | Patient198   |
| 21283 | Patient152B  | Patient183A  |
| 21283 | Patient198   | Patient202   |
| 21284 | Patient069   | Patient074E  |
| 21284 | Patient097E  | Patient215   |
| 21284 | Patient126C  | Patient152B  |
| 21284 | Patient131   | Patient215   |
| 21284 | Patient150A  | Patient215   |
| 21284 | Patient173B  | Patient215   |
| 21284 | Patient179   | Patient252A  |
| 21284 | Patient179   | Patient252F  |
| 21285 | Patient021A1 | Patient258C1 |
| 21285 | Patient021A1 | Patient258C2 |
| 21285 | Patient034B  | Patient198   |
| 21285 | Patient126C  | Patient152A  |
| 21285 | Patient152A  | Patient183A  |
| 21285 | Patient183C  | Patient198   |
| 21286 | Patient021A2 | Patient258C1 |
| 21286 | Patient021A2 | Patient258C2 |
| 21286 | Patient120A  | Patient180   |
| 21286 | Patient192F  | Patient258C1 |
| 21286 | Patient192F  | Patient258C2 |
| 21286 | Patient215   | Patient235E  |
| 21287 | Patient123A  | Patient198   |
| 21287 | Patient123B  | Patient198   |
| 21287 | Patient123C  | Patient198   |
| 21287 | Patient150C  | Patient215   |
| 21287 | Patient215   | Patient235F  |
| 21288 | Patient183A  | Patient198   |

|       |             |              |
|-------|-------------|--------------|
| 21288 | Patient192D | Patient208   |
| 21289 | Patient177  | Patient208   |
| 21290 | Patient092H | Patient198   |
| 21290 | Patient100A | Patient179   |
| 21290 | Patient120A | Patient179   |
| 21291 | Patient026C | Patient208   |
| 21291 | Patient120A | Patient233   |
| 21291 | Patient177  | Patient215   |
| 21291 | Patient192B | Patient258C1 |
| 21291 | Patient192B | Patient258C2 |
| 21292 | Patient121A | Patient208   |
| 21292 | Patient150B | Patient215   |
| 21292 | Patient180  | Patient252B  |
| 21292 | Patient206  | Patient208   |
| 21293 | Patient055  | Patient233   |
| 21294 | Patient123D | Patient198   |
| 21294 | Patient145C | Patient198   |
| 21296 | Patient022B | Patient208   |
| 21296 | Patient145A | Patient198   |
| 21296 | Patient173A | Patient233   |
| 21297 | Patient045D | Patient198   |
| 21297 | Patient164  | Patient215   |
| 21297 | Patient192E | Patient258C1 |
| 21297 | Patient192E | Patient258C2 |
| 21298 | Patient055  | Patient258C1 |
| 21298 | Patient055  | Patient258C2 |
| 21298 | Patient074B | Patient233   |
| 21299 | Patient100A | Patient180   |
| 21299 | Patient180  | Patient252F  |
| 21300 | Patient092A | Patient152B  |
| 21300 | Patient152B | Patient192C  |
| 21300 | Patient180  | Patient252A  |
| 21300 | Patient181A | Patient233   |
| 21300 | Patient181B | Patient233   |
| 21300 | Patient215  | Patient252A  |
| 21300 | Patient215  | Patient252F  |
| 21301 | Patient074A | Patient233   |
| 21301 | Patient092E | Patient152B  |
| 21301 | Patient177  | Patient258C1 |
| 21301 | Patient177  | Patient258C2 |
| 21302 | Patient092A | Patient152A  |
| 21302 | Patient103A | Patient215   |
| 21302 | Patient152A | Patient192C  |
| 21302 | Patient215  | Patient252B  |
| 21302 | Patient224A | Patient233   |
| 21303 | Patient092E | Patient152A  |
| 21303 | Patient121B | Patient208   |
| 21303 | Patient152B | Patient192A  |
| 21303 | Patient224B | Patient233   |
| 21304 | Patient126D | Patient208   |

|       |              |              |
|-------|--------------|--------------|
| 21304 | Patient177   | Patient233   |
| 21305 | Patient045D  | Patient258C1 |
| 21305 | Patient045D  | Patient258C2 |
| 21305 | Patient074C  | Patient233   |
| 21305 | Patient092B  | Patient152B  |
| 21305 | Patient120A  | Patient215   |
| 21305 | Patient152A  | Patient192A  |
| 21307 | Patient021A1 | Patient215   |
| 21307 | Patient074D  | Patient189C2 |
| 21307 | Patient092B  | Patient152A  |
| 21307 | Patient258C1 | Patient258E  |
| 21307 | Patient258C2 | Patient258E  |
| 21308 | Patient021A2 | Patient215   |
| 21308 | Patient074D  | Patient233   |
| 21308 | Patient126A  | Patient233   |
| 21309 | Patient103A  | Patient233   |
| 21309 | Patient108A  | Patient179   |
| 21309 | Patient131   | Patient208   |
| 21309 | Patient195   | Patient215   |
| 21310 | Patient074E  | Patient233   |
| 21310 | Patient202   | Patient215   |
| 21311 | Patient074D  | Patient189C1 |
| 21312 | Patient103C  | Patient233   |
| 21312 | Patient152B  | Patient192B  |
| 21312 | Patient152B  | Patient192F  |
| 21313 | Patient074B  | Patient189C2 |
| 21313 | Patient108D  | Patient179   |
| 21314 | Patient152A  | Patient192B  |
| 21314 | Patient152A  | Patient192F  |
| 21315 | Patient033   | Patient258C2 |
| 21315 | Patient074A  | Patient189C2 |
| 21315 | Patient074C  | Patient189C2 |
| 21315 | Patient126E  | Patient208   |
| 21316 | Patient033   | Patient258C1 |
| 21316 | Patient208   | Patient217A  |
| 21317 | Patient053C  | Patient208   |
| 21317 | Patient074B  | Patient189C1 |
| 21318 | Patient103B  | Patient233   |
| 21318 | Patient108A  | Patient180   |
| 21318 | Patient109A  | Patient179   |
| 21318 | Patient120A  | Patient152B  |
| 21319 | Patient021A1 | Patient198   |
| 21319 | Patient021A2 | Patient198   |
| 21319 | Patient053A2 | Patient208   |
| 21319 | Patient053B  | Patient208   |
| 21319 | Patient074A  | Patient189C1 |
| 21319 | Patient074C  | Patient189C1 |
| 21319 | Patient108G  | Patient179   |
| 21319 | Patient121A  | Patient198   |
| 21319 | Patient192C  | Patient198   |

|       |              |              |
|-------|--------------|--------------|
| 21320 | Patient092A  | Patient198   |
| 21320 | Patient109B  | Patient179   |
| 21320 | Patient120A  | Patient152A  |
| 21320 | Patient215   | Patient235A  |
| 21321 | Patient092E  | Patient198   |
| 21321 | Patient152B  | Patient192E  |
| 21321 | Patient195   | Patient233   |
| 21321 | Patient208   | Patient217E  |
| 21321 | Patient208   | Patient217H  |
| 21321 | Patient208   | Patient232B  |
| 21322 | Patient074E  | Patient189C2 |
| 21322 | Patient192A  | Patient198   |
| 21322 | Patient208   | Patient217B  |
| 21322 | Patient208   | Patient217D  |
| 21322 | Patient208   | Patient217I  |
| 21323 | Patient152A  | Patient192E  |
| 21323 | Patient208   | Patient213A  |
| 21323 | Patient208   | Patient217C  |
| 21323 | Patient208   | Patient217F  |
| 21324 | Patient108D  | Patient180   |
| 21324 | Patient108H  | Patient179   |
| 21324 | Patient208   | Patient232E  |
| 21325 | Patient033   | Patient198   |
| 21325 | Patient092B  | Patient198   |
| 21325 | Patient108F  | Patient179   |
| 21325 | Patient109D  | Patient179   |
| 21326 | Patient074E  | Patient189C1 |
| 21326 | Patient086E  | Patient208   |
| 21326 | Patient109E  | Patient179   |
| 21327 | Patient021A2 | Patient171   |
| 21327 | Patient029   | Patient246C  |
| 21327 | Patient029   | Patient246E  |
| 21328 | Patient021A1 | Patient171   |
| 21328 | Patient086C  | Patient208   |
| 21328 | Patient108G  | Patient180   |
| 21328 | Patient109A  | Patient180   |
| 21328 | Patient109C  | Patient179   |
| 21328 | Patient208   | Patient217J  |
| 21328 | Patient208   | Patient232A  |
| 21328 | Patient208   | Patient232D  |
| 21329 | Patient208   | Patient232C  |
| 21330 | Patient029   | Patient246B  |
| 21330 | Patient103D  | Patient215   |
| 21331 | Patient086A  | Patient208   |
| 21331 | Patient109B  | Patient180   |
| 21331 | Patient121B  | Patient198   |
| 21331 | Patient192B  | Patient198   |
| 21331 | Patient192F  | Patient198   |
| 21332 | Patient152B  | Patient173A  |
| 21332 | Patient213A  | Patient233   |

|       |             |              |
|-------|-------------|--------------|
| 21333 | Patient029  | Patient246D  |
| 21333 | Patient103A | Patient258C1 |
| 21333 | Patient103A | Patient258C2 |
| 21333 | Patient108H | Patient180   |
| 21334 | Patient092G | Patient208   |
| 21334 | Patient103E | Patient215   |
| 21334 | Patient108F | Patient180   |
| 21334 | Patient109D | Patient180   |
| 21334 | Patient152A | Patient173A  |
| 21335 | Patient109E | Patient180   |
| 21335 | Patient152B | Patient235E  |
| 21336 | Patient074B | Patient152B  |
| 21336 | Patient086B | Patient208   |
| 21336 | Patient152B | Patient235F  |
| 21337 | Patient152A | Patient235E  |
| 21337 | Patient152B | Patient181A  |
| 21337 | Patient152B | Patient181B  |
| 21338 | Patient074B | Patient152A  |
| 21338 | Patient092H | Patient208   |
| 21338 | Patient103D | Patient233   |
| 21338 | Patient109C | Patient180   |
| 21338 | Patient152A | Patient235F  |
| 21338 | Patient152B | Patient224A  |
| 21338 | Patient173B | Patient179   |
| 21339 | Patient074A | Patient152B  |
| 21339 | Patient081C | Patient258C1 |
| 21339 | Patient081C | Patient258C2 |
| 21339 | Patient152A | Patient181A  |
| 21339 | Patient152A | Patient181B  |
| 21340 | Patient033  | Patient215   |
| 21340 | Patient152A | Patient224A  |
| 21340 | Patient192E | Patient198   |
| 21341 | Patient007A | Patient233   |
| 21341 | Patient074A | Patient152A  |
| 21341 | Patient103E | Patient233   |
| 21341 | Patient126A | Patient152B  |
| 21341 | Patient181A | Patient215   |
| 21341 | Patient181B | Patient215   |
| 21342 | Patient007B | Patient233   |
| 21342 | Patient026C | Patient258C1 |
| 21342 | Patient026C | Patient258C2 |
| 21343 | Patient074C | Patient152B  |
| 21343 | Patient100A | Patient258C1 |
| 21343 | Patient100A | Patient258C2 |
| 21343 | Patient126A | Patient152A  |
| 21343 | Patient152B | Patient224B  |
| 21343 | Patient173B | Patient180   |
| 21344 | Patient081E | Patient208   |
| 21344 | Patient152B | Patient177   |
| 21344 | Patient152B | Patient235C  |

|       |              |              |
|-------|--------------|--------------|
| 21345 | Patient074C  | Patient152A  |
| 21345 | Patient208   | Patient263A  |
| 21346 | Patient074D  | Patient152B  |
| 21346 | Patient152A  | Patient177   |
| 21346 | Patient152A  | Patient224B  |
| 21346 | Patient152A  | Patient235C  |
| 21346 | Patient192D  | Patient258C1 |
| 21346 | Patient192D  | Patient258C2 |
| 21346 | Patient198   | Patient235E  |
| 21347 | Patient081B  | Patient208   |
| 21347 | Patient081F  | Patient208   |
| 21347 | Patient198   | Patient235F  |
| 21348 | Patient023   | Patient215   |
| 21348 | Patient074D  | Patient152A  |
| 21348 | Patient074E  | Patient152B  |
| 21348 | Patient081A2 | Patient208   |
| 21348 | Patient103A  | Patient152B  |
| 21348 | Patient126D  | Patient258C1 |
| 21348 | Patient126D  | Patient258C2 |
| 21348 | Patient152B  | Patient235B  |
| 21348 | Patient177   | Patient198   |
| 21349 | Patient081D  | Patient258C1 |
| 21349 | Patient081D  | Patient258C2 |
| 21349 | Patient103C  | Patient152B  |
| 21349 | Patient215   | Patient224B  |
| 21350 | Patient074E  | Patient152A  |
| 21350 | Patient081A1 | Patient208   |
| 21350 | Patient100A  | Patient198   |
| 21350 | Patient103A  | Patient152A  |
| 21350 | Patient152A  | Patient235B  |
| 21350 | Patient208   | Patient222C  |
| 21352 | Patient103C  | Patient152A  |
| 21352 | Patient141A  | Patient180   |
| 21352 | Patient141B  | Patient180   |
| 21352 | Patient196F  | Patient208   |
| 21353 | Patient180   | Patient230A  |
| 21354 | Patient121A  | Patient215   |
| 21354 | Patient141C  | Patient180   |
| 21354 | Patient179   | Patient235C  |
| 21354 | Patient180   | Patient235C  |
| 21356 | Patient103B  | Patient152B  |
| 21357 | Patient022B  | Patient152B  |
| 21357 | Patient141A  | Patient179   |
| 21357 | Patient141B  | Patient179   |
| 21357 | Patient141D  | Patient208   |
| 21357 | Patient179   | Patient230A  |
| 21357 | Patient208   | Patient230A  |
| 21357 | Patient208   | Patient235A  |
| 21358 | Patient103B  | Patient152A  |
| 21358 | Patient179   | Patient235B  |

|       |              |              |
|-------|--------------|--------------|
| 21358 | Patient180   | Patient235B  |
| 21359 | Patient022B  | Patient152A  |
| 21359 | Patient126A  | Patient215   |
| 21359 | Patient141C  | Patient179   |
| 21360 | Patient103D  | Patient258C1 |
| 21360 | Patient103D  | Patient258C2 |
| 21360 | Patient141B  | Patient208   |
| 21361 | Patient022B  | Patient198   |
| 21361 | Patient032B  | Patient208   |
| 21361 | Patient081E  | Patient258C1 |
| 21361 | Patient081E  | Patient258C2 |
| 21361 | Patient108B2 | Patient208   |
| 21361 | Patient141A  | Patient208   |
| 21362 | Patient081B  | Patient258C1 |
| 21362 | Patient081B  | Patient258C2 |
| 21362 | Patient141C  | Patient208   |
| 21363 | Patient045D  | Patient208   |
| 21363 | Patient079A1 | Patient179   |
| 21363 | Patient081F  | Patient258C1 |
| 21363 | Patient081F  | Patient258C2 |
| 21363 | Patient103E  | Patient258C1 |
| 21363 | Patient103E  | Patient258C2 |
| 21363 | Patient217A  | Patient258C2 |
| 21364 | Patient032A  | Patient208   |
| 21364 | Patient034A  | Patient208   |
| 21364 | Patient108B1 | Patient208   |
| 21364 | Patient217A  | Patient258C1 |
| 21365 | Patient066D  | Patient180   |
| 21365 | Patient079B  | Patient179   |
| 21365 | Patient081A2 | Patient258C1 |
| 21365 | Patient081A2 | Patient258C2 |
| 21366 | Patient079A2 | Patient179   |
| 21366 | Patient081A1 | Patient258C1 |
| 21366 | Patient081A1 | Patient258C2 |
| 21366 | Patient092A  | Patient208   |
| 21366 | Patient152B  | Patient213A  |
| 21367 | Patient034E  | Patient208   |
| 21367 | Patient066E  | Patient180   |
| 21367 | Patient079C  | Patient179   |
| 21367 | Patient103A  | Patient198   |
| 21368 | Patient121B  | Patient215   |
| 21368 | Patient152A  | Patient213A  |
| 21368 | Patient180   | Patient230B  |
| 21368 | Patient217E  | Patient258C2 |
| 21368 | Patient217H  | Patient258C2 |
| 21368 | Patient217I  | Patient258C2 |
| 21369 | Patient026A  | Patient179   |
| 21369 | Patient217B  | Patient258C2 |
| 21369 | Patient217D  | Patient258C2 |
| 21369 | Patient217E  | Patient258C1 |

|       |              |              |
|-------|--------------|--------------|
| 21369 | Patient217H  | Patient258C1 |
| 21369 | Patient217I  | Patient258C1 |
| 21370 | Patient092E  | Patient208   |
| 21370 | Patient126D  | Patient198   |
| 21370 | Patient217B  | Patient258C1 |
| 21370 | Patient217C  | Patient258C2 |
| 21370 | Patient217D  | Patient258C1 |
| 21370 | Patient217F  | Patient258C2 |
| 21371 | Patient026B  | Patient179   |
| 21371 | Patient034C  | Patient208   |
| 21371 | Patient034D  | Patient208   |
| 21371 | Patient066F  | Patient180   |
| 21371 | Patient179   | Patient230B  |
| 21371 | Patient217C  | Patient258C1 |
| 21371 | Patient217F  | Patient258C1 |
| 21372 | Patient026F  | Patient179   |
| 21372 | Patient092B  | Patient208   |
| 21373 | Patient066D  | Patient179   |
| 21373 | Patient097D  | Patient179   |
| 21373 | Patient198   | Patient258F  |
| 21374 | Patient026A  | Patient180   |
| 21374 | Patient034B  | Patient208   |
| 21374 | Patient079A1 | Patient180   |
| 21374 | Patient097A  | Patient179   |
| 21374 | Patient097C  | Patient179   |
| 21374 | Patient208   | Patient230B  |
| 21375 | Patient007A  | Patient208   |
| 21375 | Patient066E  | Patient179   |
| 21375 | Patient074B  | Patient215   |
| 21375 | Patient120D  | Patient233   |
| 21375 | Patient123A  | Patient208   |
| 21375 | Patient152B  | Patient195   |
| 21375 | Patient217J  | Patient258C2 |
| 21376 | Patient007B  | Patient208   |
| 21376 | Patient026B  | Patient180   |
| 21376 | Patient074A  | Patient215   |
| 21376 | Patient079B  | Patient180   |
| 21376 | Patient103D  | Patient152B  |
| 21376 | Patient120C  | Patient233   |
| 21376 | Patient123B  | Patient208   |
| 21376 | Patient123C  | Patient208   |
| 21376 | Patient208   | Patient230F  |
| 21376 | Patient217J  | Patient258C1 |
| 21377 | Patient026F  | Patient180   |
| 21377 | Patient079A2 | Patient180   |
| 21377 | Patient152A  | Patient195   |
| 21377 | Patient173A  | Patient215   |
| 21377 | Patient198   | Patient258A1 |
| 21377 | Patient198   | Patient258B  |
| 21377 | Patient208   | Patient230E  |



|       |             |              |
|-------|-------------|--------------|
| 21378 | Patient026F | Patient208   |
| 21378 | Patient079C | Patient180   |
| 21378 | Patient097D | Patient180   |
| 21378 | Patient103D | Patient152A  |
| 21378 | Patient120B | Patient233   |
| 21378 | Patient180  | Patient230F  |
| 21378 | Patient198  | Patient258A2 |
| 21378 | Patient198  | Patient258G  |
| 21379 | Patient066D | Patient208   |
| 21379 | Patient066F | Patient179   |
| 21379 | Patient097A | Patient180   |
| 21379 | Patient097C | Patient180   |
| 21379 | Patient103E | Patient152B  |
| 21379 | Patient180  | Patient230E  |
| 21380 | Patient097B | Patient179   |
| 21380 | Patient198  | Patient258D  |
| 21381 | Patient074C | Patient215   |
| 21381 | Patient103E | Patient152A  |
| 21381 | Patient179  | Patient230F  |
| 21383 | Patient097E | Patient179   |
| 21383 | Patient103C | Patient215   |
| 21383 | Patient123D | Patient208   |
| 21383 | Patient173B | Patient208   |
| 21384 | Patient026B | Patient208   |
| 21384 | Patient066E | Patient208   |
| 21384 | Patient066F | Patient208   |
| 21384 | Patient179  | Patient230E  |
| 21384 | Patient215  | Patient235C  |
| 21385 | Patient074D | Patient215   |
| 21385 | Patient097B | Patient180   |
| 21385 | Patient126C | Patient208   |
| 21386 | Patient026A | Patient208   |
| 21387 | Patient097E | Patient180   |
| 21387 | Patient141B | Patient258C1 |
| 21387 | Patient141B | Patient258C2 |
| 21387 | Patient215  | Patient235B  |
| 21388 | Patient074E | Patient215   |
| 21388 | Patient141A | Patient258C1 |
| 21388 | Patient141A | Patient258C2 |
| 21389 | Patient126C | Patient179   |
| 21389 | Patient141C | Patient258C1 |
| 21389 | Patient141C | Patient258C2 |
| 21390 | Patient145C | Patient208   |
| 21390 | Patient230A | Patient258C1 |
| 21390 | Patient230A | Patient258C2 |
| 21391 | Patient026D | Patient258C1 |
| 21391 | Patient026D | Patient258C2 |
| 21391 | Patient103B | Patient215   |
| 21391 | Patient120A | Patient208   |
| 21391 | Patient230D | Patient258C1 |

|       |             |              |
|-------|-------------|--------------|
| 21391 | Patient230D | Patient258C2 |
| 21392 | Patient026E | Patient258C1 |
| 21392 | Patient026E | Patient258C2 |
| 21392 | Patient145A | Patient208   |
| 21392 | Patient235A | Patient258C1 |
| 21392 | Patient235A | Patient258C2 |
| 21393 | Patient097A | Patient258C1 |
| 21393 | Patient097A | Patient258C2 |
| 21393 | Patient120D | Patient215   |
| 21393 | Patient126C | Patient180   |
| 21394 | Patient241  | Patient258C1 |
| 21394 | Patient241  | Patient258C2 |
| 21395 | Patient103D | Patient198   |
| 21395 | Patient173A | Patient179   |
| 21395 | Patient215  | Patient224A  |
| 21396 | Patient023  | Patient208   |
| 21396 | Patient120C | Patient215   |
| 21397 | Patient103E | Patient198   |
| 21398 | Patient120B | Patient215   |
| 21398 | Patient192D | Patient198   |
| 21399 | Patient097D | Patient258C1 |
| 21399 | Patient097D | Patient258C2 |
| 21400 | Patient029  | Patient121A  |
| 21401 | Patient173A | Patient180   |
| 21402 | Patient097B | Patient258C1 |
| 21402 | Patient097B | Patient258C2 |
| 21402 | Patient097C | Patient258C1 |
| 21402 | Patient097C | Patient258C2 |
| 21402 | Patient120C | Patient180   |
| 21402 | Patient120D | Patient152B  |
| 21402 | Patient202  | Patient208   |
| 21402 | Patient213A | Patient258C1 |
| 21402 | Patient213A | Patient258C2 |
| 21402 | Patient230F | Patient258C1 |
| 21402 | Patient230F | Patient258C2 |
| 21404 | Patient120D | Patient152A  |
| 21404 | Patient120D | Patient180   |
| 21404 | Patient179  | Patient181A  |
| 21404 | Patient230B | Patient258C1 |
| 21404 | Patient230B | Patient258C2 |
| 21405 | Patient120C | Patient152B  |
| 21405 | Patient179  | Patient181B  |
| 21405 | Patient180  | Patient181A  |
| 21406 | Patient120B | Patient180   |
| 21407 | Patient120B | Patient152B  |
| 21407 | Patient120C | Patient152A  |
| 21407 | Patient161B | Patient258C1 |
| 21407 | Patient161B | Patient258C2 |
| 21407 | Patient180  | Patient181B  |
| 21408 | Patient097E | Patient258C1 |

|       |              |              |
|-------|--------------|--------------|
| 21408 | Patient097E  | Patient258C2 |
| 21408 | Patient108B2 | Patient258C1 |
| 21408 | Patient108B2 | Patient258C2 |
| 21408 | Patient120C  | Patient179   |
| 21409 | Patient120B  | Patient152A  |
| 21411 | Patient007A  | Patient215   |
| 21411 | Patient108B1 | Patient258C1 |
| 21411 | Patient108B1 | Patient258C2 |
| 21411 | Patient120D  | Patient179   |
| 21411 | Patient198   | Patient258E  |
| 21412 | Patient007B  | Patient215   |
| 21413 | Patient045C  | Patient258C2 |
| 21413 | Patient120B  | Patient179   |
| 21413 | Patient164   | Patient258C1 |
| 21413 | Patient164   | Patient258C2 |
| 21413 | Patient242   | Patient258C1 |
| 21413 | Patient242   | Patient258C2 |
| 21414 | Patient045A  | Patient258C2 |
| 21414 | Patient045C  | Patient258C1 |
| 21414 | Patient126A  | Patient208   |
| 21415 | Patient045A  | Patient258C1 |
| 21417 | Patient045B  | Patient258C2 |
| 21417 | Patient230E  | Patient258C1 |
| 21417 | Patient230E  | Patient258C2 |
| 21418 | Patient045B  | Patient258C1 |
| 21418 | Patient180   | Patient224B  |
| 21420 | Patient126C  | Patient258C1 |
| 21420 | Patient126C  | Patient258C2 |
| 21420 | Patient220B  | Patient258C1 |
| 21420 | Patient220B  | Patient258C2 |
| 21422 | Patient173A  | Patient208   |
| 21423 | Patient208   | Patient261A  |
| 21423 | Patient208   | Patient261D  |
| 21424 | Patient181B  | Patient208   |
| 21425 | Patient179   | Patient224B  |
| 21425 | Patient181A  | Patient208   |
| 21426 | Patient066D  | Patient258C1 |
| 21426 | Patient066D  | Patient258C2 |
| 21427 | Patient208   | Patient261B  |
| 21428 | Patient195   | Patient208   |
| 21429 | Patient026F  | Patient258C1 |
| 21429 | Patient026F  | Patient258C2 |
| 21429 | Patient192C  | Patient208   |
| 21430 | Patient192A  | Patient208   |
| 21431 | Patient066E  | Patient258C1 |
| 21431 | Patient066E  | Patient258C2 |
| 21431 | Patient126A  | Patient179   |
| 21431 | Patient198   | Patient252A  |
| 21431 | Patient208   | Patient224B  |
| 21432 | Patient066F  | Patient258C1 |

|       |              |              |
|-------|--------------|--------------|
| 21432 | Patient066F  | Patient258C2 |
| 21433 | Patient150A  | Patient258C1 |
| 21433 | Patient150A  | Patient258C2 |
| 21434 | Patient026C  | Patient198   |
| 21434 | Patient150C  | Patient258C1 |
| 21434 | Patient150C  | Patient258C2 |
| 21435 | Patient198   | Patient252F  |
| 21436 | Patient103A  | Patient208   |
| 21436 | Patient126A  | Patient180   |
| 21436 | Patient198   | Patient252B  |
| 21437 | Patient026B  | Patient258C1 |
| 21437 | Patient026B  | Patient258C2 |
| 21437 | Patient173B  | Patient258C1 |
| 21437 | Patient173B  | Patient258C2 |
| 21438 | Patient108D  | Patient258C1 |
| 21438 | Patient108D  | Patient258C2 |
| 21438 | Patient208   | Patient224A  |
| 21439 | Patient192B  | Patient208   |
| 21440 | Patient150B  | Patient258C1 |
| 21440 | Patient150B  | Patient258C2 |
| 21440 | Patient164   | Patient198   |
| 21441 | Patient192F  | Patient208   |
| 21441 | Patient208   | Patient235E  |
| 21442 | Patient026A  | Patient258C1 |
| 21442 | Patient026A  | Patient258C2 |
| 21442 | Patient108A  | Patient258C1 |
| 21442 | Patient108A  | Patient258C2 |
| 21442 | Patient120A  | Patient258C1 |
| 21442 | Patient120A  | Patient258C2 |
| 21442 | Patient208   | Patient235F  |
| 21443 | Patient081C  | Patient198   |
| 21443 | Patient097A  | Patient198   |
| 21443 | Patient103C  | Patient208   |
| 21443 | Patient109A  | Patient258C1 |
| 21443 | Patient109A  | Patient258C2 |
| 21444 | Patient108G  | Patient258C1 |
| 21444 | Patient108G  | Patient258C2 |
| 21444 | Patient109B  | Patient258C1 |
| 21444 | Patient109B  | Patient258C2 |
| 21444 | Patient109C  | Patient258C1 |
| 21444 | Patient109C  | Patient258C2 |
| 21445 | Patient131   | Patient258C1 |
| 21445 | Patient131   | Patient258C2 |
| 21446 | Patient108B1 | Patient198   |
| 21446 | Patient108B2 | Patient198   |
| 21446 | Patient192E  | Patient208   |
| 21447 | Patient208   | Patient247D  |
| 21448 | Patient108H  | Patient258C1 |
| 21448 | Patient108H  | Patient258C2 |
| 21448 | Patient109D  | Patient258C1 |

|       |              |              |
|-------|--------------|--------------|
| 21448 | Patient109D  | Patient258C2 |
| 21448 | Patient195   | Patient258C1 |
| 21448 | Patient195   | Patient258C2 |
| 21449 | Patient097D  | Patient198   |
| 21449 | Patient109E  | Patient258C1 |
| 21449 | Patient109E  | Patient258C2 |
| 21451 | Patient103B  | Patient208   |
| 21452 | Patient097B  | Patient198   |
| 21452 | Patient252F  | Patient258C1 |
| 21452 | Patient252F  | Patient258C2 |
| 21453 | Patient081D  | Patient198   |
| 21453 | Patient252A  | Patient258C1 |
| 21453 | Patient252A  | Patient258C2 |
| 21453 | Patient252B  | Patient258C1 |
| 21453 | Patient252B  | Patient258C2 |
| 21454 | Patient081E  | Patient198   |
| 21454 | Patient097C  | Patient198   |
| 21454 | Patient108A  | Patient198   |
| 21454 | Patient109A  | Patient198   |
| 21454 | Patient131   | Patient198   |
| 21454 | Patient198   | Patient220B  |
| 21455 | Patient081F  | Patient198   |
| 21455 | Patient104B  | Patient208   |
| 21455 | Patient108D  | Patient198   |
| 21457 | Patient045C  | Patient198   |
| 21457 | Patient081B  | Patient198   |
| 21457 | Patient104A  | Patient208   |
| 21458 | Patient045A  | Patient198   |
| 21458 | Patient108G  | Patient198   |
| 21458 | Patient109C  | Patient198   |
| 21459 | Patient097E  | Patient198   |
| 21460 | Patient081A2 | Patient198   |
| 21460 | Patient108F  | Patient258C1 |
| 21460 | Patient108F  | Patient258C2 |
| 21460 | Patient198   | Patient217A  |
| 21460 | Patient208   | Patient235C  |
| 21461 | Patient045B  | Patient198   |
| 21461 | Patient081A1 | Patient198   |
| 21461 | Patient208   | Patient235B  |
| 21462 | Patient108F  | Patient198   |
| 21462 | Patient108H  | Patient198   |
| 21462 | Patient109B  | Patient198   |
| 21462 | Patient141B  | Patient198   |
| 21463 | Patient141A  | Patient198   |
| 21463 | Patient208   | Patient246A  |
| 21464 | Patient109E  | Patient198   |
| 21464 | Patient141C  | Patient198   |
| 21465 | Patient100A  | Patient208   |
| 21465 | Patient109D  | Patient198   |
| 21465 | Patient198   | Patient217E  |

|       |              |              |
|-------|--------------|--------------|
| 21465 | Patient198   | Patient217H  |
| 21465 | Patient208   | Patient247E  |
| 21466 | Patient103D  | Patient208   |
| 21466 | Patient198   | Patient217B  |
| 21466 | Patient198   | Patient217D  |
| 21466 | Patient198   | Patient217I  |
| 21467 | Patient198   | Patient217C  |
| 21467 | Patient198   | Patient217F  |
| 21468 | Patient103E  | Patient208   |
| 21468 | Patient208   | Patient247B  |
| 21469 | Patient208   | Patient247A  |
| 21469 | Patient208   | Patient247C  |
| 21472 | Patient079A1 | Patient198   |
| 21472 | Patient157   | Patient208   |
| 21472 | Patient198   | Patient217J  |
| 21473 | Patient079A1 | Patient258C1 |
| 21473 | Patient079A1 | Patient258C2 |
| 21473 | Patient079B  | Patient258C1 |
| 21473 | Patient079B  | Patient258C2 |
| 21474 | Patient079A2 | Patient198   |
| 21474 | Patient079A2 | Patient258C1 |
| 21474 | Patient079A2 | Patient258C2 |
| 21474 | Patient079C  | Patient198   |
| 21474 | Patient079C  | Patient258C1 |
| 21474 | Patient079C  | Patient258C2 |
| 21475 | Patient079B  | Patient198   |
| 21475 | Patient198   | Patient230A  |
| 21476 | Patient007A  | Patient198   |
| 21476 | Patient120D  | Patient208   |
| 21477 | Patient007B  | Patient198   |
| 21477 | Patient198   | Patient213A  |
| 21477 | Patient208   | Patient213B  |
| 21477 | Patient235C  | Patient258C1 |
| 21477 | Patient235C  | Patient258C2 |
| 21479 | Patient120C  | Patient208   |
| 21479 | Patient198   | Patient230D  |
| 21479 | Patient213A  | Patient215   |
| 21480 | Patient235B  | Patient258C1 |
| 21480 | Patient235B  | Patient258C2 |
| 21481 | Patient103C  | Patient180   |
| 21483 | Patient026D  | Patient198   |
| 21483 | Patient103B  | Patient180   |
| 21483 | Patient120B  | Patient208   |
| 21483 | Patient180   | Patient224A  |
| 21484 | Patient026E  | Patient198   |
| 21484 | Patient208   | Patient252A  |
| 21486 | Patient103C  | Patient179   |
| 21486 | Patient208   | Patient252B  |
| 21487 | Patient103B  | Patient179   |
| 21489 | Patient179   | Patient224A  |

|       |             |              |
|-------|-------------|--------------|
| 21489 | Patient198  | Patient230F  |
| 21489 | Patient208  | Patient252F  |
| 21490 | Patient189A | Patient208   |
| 21491 | Patient126C | Patient198   |
| 21491 | Patient198  | Patient230B  |
| 21491 | Patient198  | Patient230E  |
| 21492 | Patient189B | Patient208   |
| 21492 | Patient189E | Patient208   |
| 21492 | Patient208  | Patient246B  |
| 21492 | Patient208  | Patient246C  |
| 21493 | Patient198  | Patient235A  |
| 21494 | Patient099E | Patient208   |
| 21497 | Patient161B | Patient198   |
| 21498 | Patient126A | Patient258C1 |
| 21498 | Patient126A | Patient258C2 |
| 21498 | Patient208  | Patient246D  |
| 21502 | Patient150A | Patient198   |
| 21502 | Patient173B | Patient198   |
| 21502 | Patient201B | Patient208   |
| 21504 | Patient150C | Patient198   |
| 21504 | Patient208  | Patient222A  |
| 21504 | Patient208  | Patient236B  |
| 21504 | Patient208  | Patient252D  |
| 21505 | Patient201E | Patient208   |
| 21505 | Patient208  | Patient246E  |
| 21506 | Patient180  | Patient195   |
| 21506 | Patient181A | Patient258C1 |
| 21506 | Patient181A | Patient258C2 |
| 21506 | Patient181B | Patient258C1 |
| 21506 | Patient181B | Patient258C2 |
| 21506 | Patient201A | Patient208   |
| 21507 | Patient097A | Patient208   |
| 21509 | Patient224B | Patient258C1 |
| 21509 | Patient224B | Patient258C2 |
| 21510 | Patient099A | Patient208   |
| 21510 | Patient150B | Patient198   |
| 21510 | Patient208  | Patient263B  |
| 21511 | Patient159  | Patient208   |
| 21512 | Patient208  | Patient220A  |
| 21512 | Patient208  | Patient222B  |
| 21513 | Patient196A | Patient208   |
| 21514 | Patient023  | Patient198   |
| 21514 | Patient097D | Patient208   |
| 21514 | Patient179  | Patient195   |
| 21514 | Patient196B | Patient208   |
| 21515 | Patient099B | Patient208   |
| 21515 | Patient127B | Patient208   |
| 21515 | Patient187  | Patient208   |
| 21515 | Patient196C | Patient208   |
| 21515 | Patient208  | Patient222E  |

|       |              |              |
|-------|--------------|--------------|
| 21517 | Patient097B  | Patient208   |
| 21517 | Patient099C  | Patient208   |
| 21517 | Patient196E  | Patient208   |
| 21517 | Patient208   | Patient222D  |
| 21517 | Patient208   | Patient265   |
| 21518 | Patient097C  | Patient208   |
| 21518 | Patient149B  | Patient208   |
| 21518 | Patient184   | Patient208   |
| 21518 | Patient196D  | Patient208   |
| 21518 | Patient208   | Patient236A  |
| 21519 | Patient099D  | Patient208   |
| 21519 | Patient208   | Patient222F  |
| 21520 | Patient026F  | Patient198   |
| 21520 | Patient127A  | Patient208   |
| 21521 | Patient026A  | Patient198   |
| 21521 | Patient026B  | Patient198   |
| 21523 | Patient097E  | Patient208   |
| 21524 | Patient173A  | Patient258C1 |
| 21524 | Patient173A  | Patient258C2 |
| 21524 | Patient208   | Patient218A  |
| 21526 | Patient074B  | Patient208   |
| 21527 | Patient074A  | Patient208   |
| 21528 | Patient208   | Patient218B  |
| 21529 | Patient074D  | Patient179   |
| 21531 | Patient066D  | Patient198   |
| 21532 | Patient074C  | Patient208   |
| 21533 | Patient079B  | Patient208   |
| 21534 | Patient074D  | Patient208   |
| 21534 | Patient079C  | Patient208   |
| 21534 | Patient120D  | Patient258C1 |
| 21534 | Patient120D  | Patient258C2 |
| 21535 | Patient023   | Patient258C1 |
| 21535 | Patient023   | Patient258C2 |
| 21535 | Patient079A1 | Patient208   |
| 21536 | Patient066E  | Patient198   |
| 21536 | Patient074B  | Patient179   |
| 21536 | Patient074D  | Patient180   |
| 21536 | Patient079A2 | Patient208   |
| 21536 | Patient120C  | Patient258C1 |
| 21536 | Patient120C  | Patient258C2 |
| 21537 | Patient074A  | Patient179   |
| 21537 | Patient074B  | Patient258C1 |
| 21537 | Patient074B  | Patient258C2 |
| 21537 | Patient074C  | Patient179   |
| 21537 | Patient103C  | Patient258C1 |
| 21537 | Patient103C  | Patient258C2 |
| 21538 | Patient066F  | Patient198   |
| 21538 | Patient074E  | Patient208   |
| 21538 | Patient120B  | Patient258C1 |
| 21538 | Patient120B  | Patient258C2 |



|       |              |              |
|-------|--------------|--------------|
| 21540 | Patient074A  | Patient258C1 |
| 21540 | Patient074A  | Patient258C2 |
| 21543 | Patient074B  | Patient180   |
| 21543 | Patient074E  | Patient179   |
| 21543 | Patient103B  | Patient258C1 |
| 21543 | Patient103B  | Patient258C2 |
| 21544 | Patient074A  | Patient180   |
| 21544 | Patient074C  | Patient180   |
| 21544 | Patient074C  | Patient258C1 |
| 21544 | Patient074C  | Patient258C2 |
| 21545 | Patient224A  | Patient258C1 |
| 21545 | Patient224A  | Patient258C2 |
| 21547 | Patient074D  | Patient258C1 |
| 21547 | Patient074D  | Patient258C2 |
| 21548 | Patient108D  | Patient208   |
| 21548 | Patient126A  | Patient198   |
| 21549 | Patient074E  | Patient258C1 |
| 21549 | Patient074E  | Patient258C2 |
| 21550 | Patient108A  | Patient208   |
| 21551 | Patient074E  | Patient180   |
| 21552 | Patient109A  | Patient208   |
| 21552 | Patient120A  | Patient198   |
| 21553 | Patient109B  | Patient208   |
| 21554 | Patient108G  | Patient208   |
| 21555 | Patient109C  | Patient208   |
| 21555 | Patient181A  | Patient198   |
| 21555 | Patient181B  | Patient198   |
| 21557 | Patient108F  | Patient208   |
| 21558 | Patient108H  | Patient208   |
| 21559 | Patient109D  | Patient208   |
| 21559 | Patient109E  | Patient208   |
| 21568 | Patient173A  | Patient198   |
| 21570 | Patient198   | Patient224B  |
| 21572 | Patient198   | Patient235C  |
| 21576 | Patient198   | Patient235B  |
| 21577 | Patient021A1 | Patient208   |
| 21577 | Patient021A2 | Patient208   |
| 21584 | Patient007A  | Patient258C1 |
| 21584 | Patient007A  | Patient258C2 |
| 21585 | Patient007B  | Patient258C1 |
| 21585 | Patient007B  | Patient258C2 |
| 21591 | Patient103C  | Patient198   |
| 21593 | Patient074B  | Patient198   |
| 21596 | Patient074A  | Patient198   |
| 21596 | Patient103B  | Patient198   |
| 21596 | Patient198   | Patient224A  |
| 21600 | Patient074C  | Patient198   |
| 21603 | Patient074D  | Patient198   |
| 21605 | Patient074E  | Patient198   |
| 21619 | Patient195   | Patient198   |

21639  
21642  
21644

Patient120D  
Patient120C  
Patient120B

Patient198  
Patient198  
Patient198
