# Supplementary material
Source: PubMed Central journal article supplement (PMC5483916)
Supplement: JCM.00164-17_zjm999095555s8.pdf [file JCM.00164-17_zjm999095555s8.pdf]

**Table S5.** Number of SNP differences between pairs of isolates from CF patients

| <b>SNP differences</b> | <b>Isolate 1</b> | <b>Isolate 2</b> |
|------------------------|------------------|------------------|
| 1                      | Patient196A      | Patient196B      |
| 1                      | Patient217B      | Patient217D      |
| 1                      | Patient217C      | Patient217D      |
| 2                      | Patient007A      | Patient007B      |
| 2                      | Patient034D      | Patient034E      |
| 2                      | Patient217B      | Patient217C      |
| 2                      | Patient222B      | Patient222C      |
| 2                      | Patient258B      | Patient258E      |
| 2                      | Patient258B      | Patient258G      |
| 2                      | Patient258D      | Patient258G      |
| 2                      | Patient258E      | Patient258G      |
| 3                      | Patient099C      | Patient099D      |
| 3                      | Patient108G      | Patient108H      |
| 3                      | Patient109C      | Patient109E      |
| 3                      | Patient196B      | Patient196F      |
| 3                      | Patient201C      | Patient201D      |
| 3                      | Patient217B      | Patient217E      |
| 3                      | Patient217C      | Patient217E      |
| 3                      | Patient217C      | Patient217F      |
| 3                      | Patient217C      | Patient217H      |
| 3                      | Patient258B      | Patient258D      |
| 3                      | Patient258D      | Patient258E      |
| 3                      | Patient261A      | Patient261B      |
| 4                      | Patient079B      | Patient079C      |
| 4                      | Patient097C      | Patient097D      |
| 4                      | Patient189A      | Patient189B      |
| 4                      | Patient217A      | Patient217C      |
| 4                      | Patient217A      | Patient217D      |
| 4                      | Patient217B      | Patient217F      |
| 4                      | Patient217D      | Patient217E      |
| 4                      | Patient217D      | Patient217H      |
| 4                      | Patient217E      | Patient217F      |
| 4                      | Patient230C      | Patient230E      |
| 4                      | Patient235C      | Patient235F      |
| 4                      | Patient236A      | Patient236B      |
| 4                      | Patient258B      | Patient258F      |
| 4                      | Patient258E      | Patient258F      |
| 4                      | Patient258F      | Patient258G      |
| 5                      | Patient053B      | Patient053C      |
| 5                      | Patient099C      | Patient099E      |
| 5                      | Patient150A      | Patient150B      |
| 5                      | Patient196A      | Patient196F      |
| 5                      | Patient201A      | Patient201B      |
| 5                      | Patient217A      | Patient217B      |
| 5                      | Patient217B      | Patient217H      |
| 5                      | Patient217D      | Patient217F      |
| 5                      | Patient222A      | Patient222C      |

|   |             |             |
|---|-------------|-------------|
| 5 | Patient230D | Patient230E |
| 5 | Patient232B | Patient232D |
| 5 | Patient258D | Patient258F |
| 6 | Patient066E | Patient066F |
| 6 | Patient086A | Patient086C |
| 6 | Patient097C | Patient097E |
| 6 | Patient097D | Patient097E |
| 6 | Patient099D | Patient099E |
| 6 | Patient109C | Patient109D |
| 6 | Patient109D | Patient109E |
| 6 | Patient126A | Patient126C |
| 6 | Patient126D | Patient126E |
| 6 | Patient173A | Patient173B |
| 6 | Patient196B | Patient196C |
| 6 | Patient196B | Patient196E |
| 6 | Patient217E | Patient217H |
| 6 | Patient224A | Patient224B |
| 6 | Patient230C | Patient230D |
| 6 | Patient230E | Patient230F |
| 6 | Patient232A | Patient232B |
| 6 | Patient232B | Patient232E |
| 6 | Patient232D | Patient232E |
| 6 | Patient247C | Patient247E |
| 6 | Patient261B | Patient261E |
| 6 | Patient263A | Patient263B |
| 7 | Patient032C | Patient032E |
| 7 | Patient034A | Patient034E |
| 7 | Patient045A | Patient045B |
| 7 | Patient081E | Patient081F |
| 7 | Patient086B | Patient086C |
| 7 | Patient099B | Patient099E |
| 7 | Patient196A | Patient196C |
| 7 | Patient196A | Patient196E |
| 7 | Patient196C | Patient196F |
| 7 | Patient217A | Patient217E |
| 7 | Patient217A | Patient217H |
| 7 | Patient217F | Patient217H |
| 7 | Patient222A | Patient222F |
| 7 | Patient230C | Patient230F |
| 7 | Patient232A | Patient232E |
| 7 | Patient232B | Patient232C |
| 8 | Patient086A | Patient086E |
| 8 | Patient099B | Patient099C |
| 8 | Patient127A | Patient127B |
| 8 | Patient150A | Patient150C |
| 8 | Patient189A | Patient189E |
| 8 | Patient217A | Patient217F |
| 8 | Patient222A | Patient222B |
| 8 | Patient232A | Patient232D |
| 8 | Patient232C | Patient232D |

|    |             |             |
|----|-------------|-------------|
| 8  | Patient235C | Patient235E |
| 8  | Patient235E | Patient235F |
| 8  | Patient247B | Patient247E |
| 9  | Patient034A | Patient034D |
| 9  | Patient045B | Patient045C |
| 9  | Patient086A | Patient086B |
| 9  | Patient097A | Patient097C |
| 9  | Patient099A | Patient099B |
| 9  | Patient099A | Patient099E |
| 9  | Patient099B | Patient099D |
| 9  | Patient123B | Patient123C |
| 9  | Patient150B | Patient150C |
| 9  | Patient152A | Patient152B |
| 9  | Patient196E | Patient196F |
| 9  | Patient222A | Patient222E |
| 9  | Patient222C | Patient222F |
| 9  | Patient230D | Patient230F |
| 9  | Patient232A | Patient232C |
| 9  | Patient247A | Patient247B |
| 9  | Patient247A | Patient247E |
| 9  | Patient247B | Patient247C |
| 9  | Patient252A | Patient252B |
| 9  | Patient261A | Patient261E |
| 10 | Patient045A | Patient045C |
| 10 | Patient066D | Patient066E |
| 10 | Patient086C | Patient086E |
| 10 | Patient094D | Patient094E |
| 10 | Patient097A | Patient097D |
| 10 | Patient099A | Patient099C |
| 10 | Patient189B | Patient189E |
| 10 | Patient196C | Patient196E |
| 10 | Patient217B | Patient217I |
| 10 | Patient217C | Patient217I |
| 10 | Patient232C | Patient232E |
| 10 | Patient247A | Patient247C |
| 11 | Patient032D | Patient032E |
| 11 | Patient034A | Patient034C |
| 11 | Patient066D | Patient066F |
| 11 | Patient086B | Patient086E |
| 11 | Patient092A | Patient092B |
| 11 | Patient123A | Patient123C |
| 11 | Patient183C | Patient183E |
| 11 | Patient217D | Patient217I |
| 11 | Patient217E | Patient217I |
| 11 | Patient222B | Patient222F |
| 11 | Patient222E | Patient222F |
| 12 | Patient032A | Patient032D |
| 12 | Patient034C | Patient034D |
| 12 | Patient034C | Patient034E |
| 12 | Patient074C | Patient074D |

|    |             |             |
|----|-------------|-------------|
| 12 | Patient092C | Patient092H |
| 12 | Patient092G | Patient092H |
| 12 | Patient097A | Patient097E |
| 12 | Patient104A | Patient104B |
| 12 | Patient123A | Patient123B |
| 12 | Patient141A | Patient141C |
| 12 | Patient141B | Patient141G |
| 12 | Patient181A | Patient181B |
| 12 | Patient217F | Patient217I |
| 12 | Patient218A | Patient218B |
| 12 | Patient222A | Patient222D |
| 13 | Patient026D | Patient026E |
| 13 | Patient032A | Patient032E |
| 13 | Patient074A | Patient074B |
| 13 | Patient092A | Patient092H |
| 13 | Patient092D | Patient092H |
| 13 | Patient099A | Patient099D |
| 13 | Patient145B | Patient145C |
| 13 | Patient183A | Patient183C |
| 13 | Patient217H | Patient217I |
| 13 | Patient222C | Patient222E |
| 13 | Patient222D | Patient222E |
| 14 | Patient032A | Patient032B |
| 14 | Patient074A | Patient074C |
| 14 | Patient093B | Patient093C |
| 14 | Patient097A | Patient097B |
| 14 | Patient149A | Patient149B |
| 14 | Patient217A | Patient217I |
| 14 | Patient222B | Patient222E |
| 14 | Patient222C | Patient222D |
| 14 | Patient247A | Patient247D |
| 14 | Patient252B | Patient252F |
| 15 | Patient092C | Patient092D |
| 15 | Patient092D | Patient092G |
| 15 | Patient094B | Patient094C |
| 15 | Patient217B | Patient217J |
| 15 | Patient217I | Patient217J |
| 15 | Patient222D | Patient222F |
| 15 | Patient252A | Patient252F |
| 15 | Patient261C | Patient261G |
| 16 | Patient032C | Patient032D |
| 16 | Patient092A | Patient092C |
| 16 | Patient092C | Patient092G |
| 16 | Patient103D | Patient103E |
| 16 | Patient141B | Patient141C |
| 16 | Patient141B | Patient141F |
| 16 | Patient201B | Patient201E |
| 16 | Patient217C | Patient217J |
| 16 | Patient217D | Patient217J |
| 16 | Patient222B | Patient222D |

|    |             |             |
|----|-------------|-------------|
| 17 | Patient074B | Patient074C |
| 17 | Patient092A | Patient092G |
| 17 | Patient094A | Patient094D |
| 17 | Patient108A | Patient108D |
| 17 | Patient123A | Patient123D |
| 17 | Patient217E | Patient217J |
| 17 | Patient217F | Patient217J |
| 18 | Patient026B | Patient026F |
| 18 | Patient032B | Patient032D |
| 18 | Patient092A | Patient092D |
| 18 | Patient092B | Patient092H |
| 18 | Patient097B | Patient097D |
| 18 | Patient183A | Patient183E |
| 18 | Patient230E | Patient230G |
| 18 | Patient235B | Patient235C |
| 18 | Patient247C | Patient247D |
| 19 | Patient032A | Patient032C |
| 19 | Patient032B | Patient032E |
| 19 | Patient081B | Patient081C |
| 19 | Patient092B | Patient092C |
| 19 | Patient094A | Patient094E |
| 19 | Patient097B | Patient097C |
| 19 | Patient230A | Patient230G |
| 19 | Patient230C | Patient230G |
| 19 | Patient230D | Patient230G |
| 19 | Patient235B | Patient235F |
| 19 | Patient247B | Patient247D |
| 20 | Patient081B | Patient081D |
| 20 | Patient092B | Patient092D |
| 20 | Patient120B | Patient120C |
| 20 | Patient141A | Patient141B |
| 20 | Patient192B | Patient192E |
| 20 | Patient217A | Patient217J |
| 20 | Patient217H | Patient217J |
| 20 | Patient230F | Patient230G |
| 21 | Patient092B | Patient092G |
| 21 | Patient097B | Patient097E |
| 21 | Patient108A | Patient108G |
| 21 | Patient121A | Patient121B |
| 21 | Patient183B | Patient183D |
| 21 | Patient201A | Patient201E |
| 21 | Patient252B | Patient252D |
| 22 | Patient074A | Patient074D |
| 22 | Patient093A | Patient093E |
| 22 | Patient108A | Patient108H |
| 22 | Patient108D | Patient108G |
| 22 | Patient123C | Patient123D |
| 23 | Patient074B | Patient074D |
| 23 | Patient120A | Patient120C |
| 23 | Patient141C | Patient141G |

|    |             |             |
|----|-------------|-------------|
| 23 | Patient141F | Patient141G |
| 23 | Patient235B | Patient235E |
| 24 | Patient032B | Patient032C |
| 24 | Patient081C | Patient081D |
| 24 | Patient093A | Patient093D |
| 24 | Patient123B | Patient123D |
| 24 | Patient247D | Patient247E |
| 25 | Patient108D | Patient108H |
| 25 | Patient141C | Patient141D |
| 25 | Patient230A | Patient230C |
| 25 | Patient230B | Patient230G |
| 26 | Patient093D | Patient093E |
| 26 | Patient103B | Patient103C |
| 26 | Patient108F | Patient108G |
| 26 | Patient109A | Patient109B |
| 26 | Patient120A | Patient120B |
| 26 | Patient141B | Patient141D |
| 26 | Patient145A | Patient145B |
| 26 | Patient196A | Patient196D |
| 27 | Patient108F | Patient108H |
| 27 | Patient141C | Patient141F |
| 27 | Patient145A | Patient145C |
| 27 | Patient196B | Patient196D |
| 27 | Patient252A | Patient252D |
| 28 | Patient192A | Patient192B |
| 28 | Patient230A | Patient230D |
| 28 | Patient230A | Patient230E |
| 28 | Patient252D | Patient252F |
| 29 | Patient026C | Patient026D |
| 29 | Patient141A | Patient141G |
| 29 | Patient196D | Patient196F |
| 30 | Patient074B | Patient074E |
| 31 | Patient074A | Patient074E |
| 31 | Patient108A | Patient108F |
| 31 | Patient108D | Patient108F |
| 31 | Patient141A | Patient141D |
| 31 | Patient141D | Patient141G |
| 31 | Patient196C | Patient196D |
| 31 | Patient230A | Patient230F |
| 32 | Patient109A | Patient109D |
| 32 | Patient230B | Patient230C |
| 32 | Patient261B | Patient261C |
| 32 | Patient261C | Patient261E |
| 33 | Patient141A | Patient141F |
| 33 | Patient196D | Patient196E |
| 33 | Patient261A | Patient261D |
| 34 | Patient026D | Patient026F |
| 34 | Patient081B | Patient081E |
| 34 | Patient109A | Patient109C |
| 34 | Patient109A | Patient109E |

|    |             |             |
|----|-------------|-------------|
| 34 | Patient109B | Patient109C |
| 34 | Patient109B | Patient109E |
| 34 | Patient261A | Patient261C |
| 34 | Patient261B | Patient261D |
| 35 | Patient026B | Patient026D |
| 35 | Patient074C | Patient074E |
| 35 | Patient081C | Patient081E |
| 35 | Patient141D | Patient141F |
| 35 | Patient230B | Patient230E |
| 36 | Patient081D | Patient081E |
| 36 | Patient109B | Patient109D |
| 36 | Patient230A | Patient230B |
| 36 | Patient230B | Patient230D |
| 36 | Patient246C | Patient246D |
| 37 | Patient026C | Patient026E |
| 37 | Patient081B | Patient081F |
| 37 | Patient081D | Patient081F |
| 37 | Patient093A | Patient093B |
| 37 | Patient093B | Patient093D |
| 37 | Patient183B | Patient183C |
| 38 | Patient081C | Patient081F |
| 38 | Patient093B | Patient093E |
| 38 | Patient230B | Patient230F |
| 39 | Patient103A | Patient103C |
| 39 | Patient261C | Patient261D |
| 39 | Patient261D | Patient261E |
| 40 | Patient026A | Patient026F |
| 40 | Patient093A | Patient093C |
| 41 | Patient026E | Patient026F |
| 41 | Patient074D | Patient074E |
| 41 | Patient092A | Patient092E |
| 41 | Patient093C | Patient093E |
| 41 | Patient261B | Patient261G |
| 41 | Patient261E | Patient261G |
| 42 | Patient026A | Patient026B |
| 42 | Patient026B | Patient026E |
| 42 | Patient026C | Patient026F |
| 42 | Patient092B | Patient092E |
| 42 | Patient093C | Patient093D |
| 42 | Patient192A | Patient192E |
| 42 | Patient235A | Patient235B |
| 42 | Patient235A | Patient235C |
| 43 | Patient026B | Patient026C |
| 43 | Patient120B | Patient120D |
| 43 | Patient183A | Patient183B |
| 43 | Patient183B | Patient183E |
| 43 | Patient183C | Patient183D |
| 43 | Patient192B | Patient192F |
| 43 | Patient246A | Patient246C |
| 44 | Patient261A | Patient261G |

|     |             |             |
|-----|-------------|-------------|
| 45  | Patient094A | Patient094B |
| 45  | Patient120A | Patient120D |
| 46  | Patient034A | Patient034B |
| 46  | Patient092E | Patient092H |
| 46  | Patient103A | Patient103B |
| 46  | Patient192A | Patient192F |
| 47  | Patient094A | Patient094C |
| 47  | Patient120C | Patient120D |
| 47  | Patient183A | Patient183D |
| 47  | Patient235A | Patient235F |
| 48  | Patient034B | Patient034E |
| 48  | Patient092D | Patient092E |
| 48  | Patient183D | Patient183E |
| 48  | Patient261D | Patient261G |
| 49  | Patient034B | Patient034D |
| 49  | Patient246A | Patient246B |
| 50  | Patient092C | Patient092E |
| 50  | Patient092E | Patient092G |
| 50  | Patient094B | Patient094D |
| 50  | Patient246A | Patient246E |
| 51  | Patient235A | Patient235E |
| 52  | Patient034B | Patient034C |
| 53  | Patient026A | Patient026D |
| 53  | Patient094C | Patient094D |
| 53  | Patient246C | Patient246E |
| 55  | Patient246B | Patient246C |
| 56  | Patient094B | Patient094E |
| 56  | Patient246A | Patient246D |
| 57  | Patient192E | Patient192F |
| 58  | Patient094C | Patient094E |
| 59  | Patient026A | Patient026C |
| 60  | Patient026A | Patient026E |
| 60  | Patient246B | Patient246E |
| 64  | Patient192A | Patient192C |
| 69  | Patient246D | Patient246E |
| 70  | Patient246B | Patient246D |
| 71  | Patient192B | Patient192C |
| 85  | Patient192C | Patient192E |
| 89  | Patient192C | Patient192F |
| 109 | Patient103A | Patient103D |
| 109 | Patient103C | Patient103D |
| 115 | Patient103A | Patient103E |
| 115 | Patient103C | Patient103E |
| 119 | Patient103B | Patient103D |
| 123 | Patient103B | Patient103E |
| 632 | Patient192A | Patient192D |
| 634 | Patient192C | Patient192D |
| 639 | Patient192B | Patient192D |
| 653 | Patient192D | Patient192E |
| 657 | Patient192D | Patient192F |

|       |             |             |
|-------|-------------|-------------|
| 10161 | Patient022A | Patient022B |
| 11079 | Patient066A | Patient066D |
| 11089 | Patient066A | Patient066E |
| 11089 | Patient066A | Patient066F |
| 11323 | Patient126C | Patient126D |
| 11352 | Patient045A | Patient045D |
| 11356 | Patient045B | Patient045D |
| 11356 | Patient045C | Patient045D |
| 11370 | Patient126C | Patient126E |
| 11375 | Patient220A | Patient220B |
| 11406 | Patient126A | Patient126D |
| 11453 | Patient126A | Patient126E |
| 11465 | Patient213A | Patient213B |
| 19417 | Patient066B | Patient066F |
| 19418 | Patient066B | Patient066E |
| 19420 | Patient066B | Patient066D |
| 19528 | Patient091A | Patient091B |
| 19639 | Patient066A | Patient066B |
| 19772 | Patient201B | Patient201C |
| 19775 | Patient201B | Patient201D |
| 19779 | Patient201C | Patient201E |
| 19780 | Patient201A | Patient201C |
| 19781 | Patient201D | Patient201E |
| 19783 | Patient201A | Patient201D |
| 20999 | Patient100A | Patient100B |
