# Supplementary material
Source: PubMed Central journal article supplement (PMC5483916)
Supplement: JCM.00164-17_zjm999095555s10.pdf [file JCM.00164-17_zjm999095555s10.pdf]

**Table S7** Times between isolates from the same patient

| <b>NumDif</b> | <b>Sample1</b> | <b>Sample2</b> | <b>Days</b> | <b>Diff per week</b> |
|---------------|----------------|----------------|-------------|----------------------|
| 1             | Patient196A    | Patient196B    | 163         | 0.0429447852761      |
| 2             | Patient007A    | Patient007B    | 35          | 0.4                  |
| 2             | Patient053A    | Patient053C    | 36          | 0.388888888889       |
| 2             | Patient217B    | Patient217C    | 107         | 0.130841121495       |
| 2             | Patient222B    | Patient222C    | 74          | 0.189189189189       |
| 2             | Patient258C    | Patient258G    | 189         | 0.0740740740741      |
| 3             | Patient053A    | Patient053D    | 107         | 0.196261682243       |
| 3             | Patient079A    | Patient079C    | 70          | 0.3                  |
| 3             | Patient217B    | Patient217D    | 182         | 0.115384615385       |
| 3             | Patient217C    | Patient217D    | 75          | 0.28                 |
| 3             | Patient217C    | Patient217E    | 188         | 0.11170212766        |
| 3             | Patient258C    | Patient258F    | 105         | 0.2                  |
| 3             | Patient258F    | Patient258G    | 84          | 0.25                 |
| 3             | Patient261A    | Patient261B    | 107         | 0.196261682243       |
| 4             | Patient079A    | Patient079D    | 168         | 0.166666666667       |
| 4             | Patient079C    | Patient079D    | 98          | 0.285714285714       |
| 4             | Patient097B    | Patient097C    | 132         | 0.212121212121       |
| 4             | Patient189A    | Patient189B    | 138         | 0.202898550725       |
| 4             | Patient217A    | Patient217C    | 147         | 0.190476190476       |
| 4             | Patient217B    | Patient217E    | 295         | 0.0949152542373      |
| 4             | Patient217D    | Patient217E    | 113         | 0.247787610619       |
| 4             | Patient236A    | Patient236B    | 91          | 0.307692307692       |
| 5             | Patient053C    | Patient053D    | 71          | 0.492957746479       |
| 5             | Patient150A    | Patient150B    | 94          | 0.372340425532       |
| 5             | Patient201A    | Patient201B    | 98          | 0.357142857143       |
| 5             | Patient217A    | Patient217B    | 107         | 0.327102803738       |
| 5             | Patient222A    | Patient222C    | 172         | 0.203488372093       |
| 5             | Patient258A    | Patient258C    | 98          | 0.357142857143       |
| 6             | Patient086A    | Patient086C    | 221         | 0.190045248869       |
| 6             | Patient196B    | Patient196C    | 103         | 0.407766990291       |
| 6             | Patient224A    | Patient224B    | 197         | 0.213197969543       |
| 6             | Patient232A    | Patient232B    | 107         | 0.392523364486       |
| 6             | Patient258A    | Patient258G    | 287         | 0.146341463415       |
| 6             | Patient263A    | Patient263B    | 198         | 0.212121212121       |
| 7             | Patient045A    | Patient045B    | 158         | 0.310126582278       |
| 7             | Patient086B    | Patient086C    | 104         | 0.471153846154       |
| 7             | Patient196A    | Patient196C    | 265         | 0.184905660377       |
| 7             | Patient232B    | Patient232C    | 132         | 0.371212121212       |
| 8             | Patient099B    | Patient099C    | 154         | 0.363636363636       |
| 8             | Patient127A    | Patient127B    | 162         | 0.345679012346       |
| 8             | Patient150A    | Patient150C    | 217         | 0.258064516129       |
| 8             | Patient217A    | Patient217E    | 335         | 0.167164179104       |
| 8             | Patient222A    | Patient222B    | 98          | 0.571428571429       |
| 8             | Patient258A    | Patient258F    | 203         | 0.275862068966       |
| 9             | Patient086A    | Patient086B    | 127         | 0.496062992126       |
| 9             | Patient099A    | Patient099B    | 91          | 0.692307692308       |
| 9             | Patient123B    | Patient123C    | 90          | 0.7                  |

|    |             |             |     |                |
|----|-------------|-------------|-----|----------------|
| 9  | Patient150B | Patient150C | 94  | 0.670212765957 |
| 9  | Patient152A | Patient152B | 147 | 0.428571428571 |
| 9  | Patient232A | Patient232C | 245 | 0.257142857143 |
| 9  | Patient247A | Patient247B | 90  | 0.7            |
| 9  | Patient247B | Patient247C | 112 | 0.5625         |
| 10 | Patient099A | Patient099C | 245 | 0.285714285714 |
| 10 | Patient247A | Patient247C | 202 | 0.346534653465 |
| 11 | Patient034A | Patient034C | 96  | 0.802083333333 |
| 11 | Patient092A | Patient092B | 193 | 0.39896373057  |
| 11 | Patient123A | Patient123C | 173 | 0.445086705202 |
| 12 | Patient104A | Patient104B | 91  | 0.923076923077 |
| 12 | Patient123A | Patient123B | 83  | 1.01204819277  |
| 12 | Patient141A | Patient141C | 205 | 0.409756097561 |
| 12 | Patient181A | Patient181B | 238 | 0.352941176471 |
| 12 | Patient218A | Patient218B | 280 | 0.3            |
| 12 | Patient222A | Patient222D | 257 | 0.326848249027 |
| 13 | Patient074A | Patient074B | 89  | 1.02247191011  |
| 13 | Patient145B | Patient145C | 92  | 0.989130434783 |
| 13 | Patient183A | Patient183C | 250 | 0.364          |
| 14 | Patient032A | Patient032B | 161 | 0.608695652174 |
| 14 | Patient074A | Patient074C | 245 | 0.4            |
| 14 | Patient108A | Patient108B | 100 | 0.98           |
| 14 | Patient149A | Patient149B | 81  | 1.20987654321  |
| 14 | Patient222C | Patient222D | 85  | 1.15294117647  |
| 16 | Patient141B | Patient141C | 112 | 1.0            |
| 16 | Patient222B | Patient222D | 159 | 0.704402515723 |
| 17 | Patient074B | Patient074C | 156 | 0.762820512821 |
| 17 | Patient108A | Patient108D | 224 | 0.53125        |
| 17 | Patient108B | Patient108D | 104 | 1.14423076923  |
| 17 | Patient123A | Patient123D | 286 | 0.416083916084 |
| 18 | Patient081A | Patient081C | 84  | 1.5            |
| 18 | Patient092A | Patient092C | 306 | 0.411764705882 |
| 18 | Patient097A | Patient097C | 247 | 0.51012145749  |
| 18 | Patient235B | Patient235C | 119 | 1.05882352941  |
| 19 | Patient032A | Patient032C | 308 | 0.431818181818 |
| 19 | Patient081C | Patient081D | 175 | 0.76           |
| 19 | Patient097A | Patient097B | 115 | 1.15652173913  |
| 20 | Patient081A | Patient081D | 259 | 0.540540540541 |
| 20 | Patient092B | Patient092C | 113 | 1.2389380531   |
| 20 | Patient141A | Patient141B | 93  | 1.50537634409  |
| 21 | Patient121A | Patient121B | 161 | 0.913043478261 |
| 22 | Patient123C | Patient123D | 113 | 1.36283185841  |
| 24 | Patient032B | Patient032C | 147 | 1.14285714286  |
| 24 | Patient123B | Patient123D | 203 | 0.827586206897 |
| 25 | Patient230A | Patient230C | 260 | 0.673076923077 |
| 26 | Patient103B | Patient103C | 84  | 2.16666666667  |
| 26 | Patient109A | Patient109B | 124 | 1.46774193548  |
| 26 | Patient120A | Patient120B | 105 | 1.73333333333  |
| 26 | Patient145A | Patient145B | 75  | 2.42666666667  |
| 27 | Patient145A | Patient145C | 167 | 1.13173652695  |

|    |             |             |     |                |
|----|-------------|-------------|-----|----------------|
| 28 | Patient192A | Patient192B | 98  | 2.0            |
| 32 | Patient230B | Patient230C | 140 | 1.6            |
| 32 | Patient261B | Patient261C | 104 | 2.15384615385  |
| 33 | Patient261A | Patient261D | 331 | 0.697885196375 |
| 34 | Patient261A | Patient261C | 211 | 1.12796208531  |
| 34 | Patient261B | Patient261D | 224 | 1.0625         |
| 36 | Patient230A | Patient230B | 120 | 2.1            |
| 37 | Patient183B | Patient183C | 129 | 2.00775193798  |
| 39 | Patient103A | Patient103C | 217 | 1.25806451613  |
| 39 | Patient261C | Patient261D | 120 | 2.275          |
| 42 | Patient026A | Patient026B | 90  | 3.26666666667  |
| 42 | Patient235A | Patient235B | 126 | 2.33333333333  |
| 42 | Patient235A | Patient235C | 245 | 1.2            |
| 43 | Patient026B | Patient026C | 77  | 3.90909090909  |
| 43 | Patient183A | Patient183B | 121 | 2.48760330579  |
| 43 | Patient246A | Patient246C | 202 | 1.4900990099   |
| 46 | Patient034A | Patient034B | 5   | 64.4           |
| 46 | Patient103A | Patient103B | 133 | 2.42105263158  |
| 49 | Patient246A | Patient246B | 90  | 3.81111111111  |
| 52 | Patient034B | Patient034C | 91  | 4.0            |
| 55 | Patient246B | Patient246C | 112 | 3.4375         |
| 59 | Patient026A | Patient026C | 167 | 2.47305389222  |
| 64 | Patient192A | Patient192C | 147 | 3.04761904762  |
| 71 | Patient192B | Patient192C | 41  | 12.1219512195  |
